# Supplementary material for: Multidimensional proteomics and explainable AI feature selection identify cross-platform lung cancer molecular signature in blood plasma
Source: Research Square preprint supplement (doi:10.21203/rs.3.rs-7660411/v1), 2025-10-31
Supplement: Supplementary file 1 [file 0275dac1e382e3215271c63f.xlsx]

## Sheet: HRF_202509151717_PEA_data
UniProt	Assay	Panel	OX_CF_00034 Pilot	OX_CF_00035 Pilot	OX_CF_00038 Pilot	OX_CF_00040 Pilot	OX_CF_00051 Pilot	OX_CF_00001 Pilot	OX_CF_00052 Pilot	OX_LC_00010 Pilot	OX_LC_00019 Pilot	OX_LC_00023 Pilot	OX_LC_00024 Pilot	OX_LC_00027 Pilot	OX_LC_00029 Pilot	OX_LC_00031 Pilot	OX_LC_00032 Pilot	OX_LC_00078 Pilot	OX_LC_00084 Pilot	OX_LC_00085 Pilot	OX_LC_00103 Pilot	OX_LC_00105 Pilot	OX_LC_00110 Pilot	OX_LC_00112 Pilot	OX_LC_00117 Pilot	OX_LC_00119 Pilot	OX_LC_00127 Pilot	OX_LC_00136 Pilot	OX_LC_00137 Pilot	OX_LC_00138 Pilot	OX_LC_00140 Pilot	OX_LC_00142 Pilot	OX_LC_00154 Pilot	OX_LC_00164 Pilot	OX_CF_00070 Pilot	OX_LC_00173 Pilot	OX_LC_00185 Pilot	OX_LC_00191 Pilot	OX_LC_00195 Pilot	OX_CF_00072 Pilot	OX_LC_00206 Pilot	OX_CF_00075 Pilot	OX_LC_00219 Pilot	OX_LC_00230 Pilot	OX_CF_00017 Pilot	OX_LC_00233 Pilot	OX_LC_00235 Pilot	OX_LC_00237 Pilot	OX_LC_00238 Pilot
A0FGR8	ESYT2	Neurology_II	1.6672	0.1198	-0.1413	-0.109	-0.963	-0.1752	-0.8694	0.2825	-0.3614	-0.5594	-0.4947	0.1288	0.2871	-0.1356	-0.0963	-0.8046	-0.6942	-0.8044	1.1865	-0.7512	-1.2044	1.0797	-0.7388	0.1426	-0.1527	0.1946	0.5143	-0.0901	1.2561	2.1373	0.1892	-0.4917	-0.8707	0.0112	1.9921	1.9075	0.7117	1.4863	-0.6995	-0.2217	-0.0112	-0.6751	-0.2625	-0.4342	1.7623	-0.4229	-0.5176
A1E959	ODAM	Neurology	0.4916	0.9375	-0.1472	1.4298	-0.1468	-0.1362	-0.2928	-0.1302	-1.5898	-0.4208	0.2582	0.0595	0.2174	0.2016	0.5061	-0.3613	0.2458	-0.7823	3.4459	0.4036	0.6921	-1.6728	0.9763	0.1055	0.503	-0.4619	-1.1027	-0.506	0.2131	1.3253	-0.6993	-0.4589	-0.0662	0.0246	0.7082	-0.7447	-0.3361	-0.141	0.6562	-1.2613	0.2641	-2.2911	0.663	0.2434	-0.4231	-1.2752	-0.0773
A1KZ92	PXDNL	Oncology_II	-0.8681	-0.6091	0.6465	0.2517	-0.4571	0.493	0.5008	-0.348	2.0644	0.83	-0.4099	0.472	0.6489	-0.1149	0.4418	0.2849	-0.1968	-0.5412	-0.5715	1.1259	-0.3195	-0.8924	-0.109	-0.468	0.0776	0.7942	-0.0536	0.3552	0.3363	0.5409	-0.3158	-0.0376	0.806	-0.548	-0.908	-0.2056	-0.4336	-0.498	1.2281	0.0875	-0.1881	-0.1032	-0.4508	-0.2323	-0.6821	0.3048	-0.5335
A1L4H1	SSC5D	Cardiometabolic	-0.8958	-0.2779	-0.0085	-0.3453	-0.4246	0.0689	-0.3505	-0.0711	1.2604	0.3091	0.0202	0.2864	-0.284	-0.0852	0.6607	0.4224	-0.3632	0.0134	-0.7414	0.2845	-0.2942	0.0076	0.2522	-0.0321	0.0705	-0.0518	0.6327	1.2704	0.1787	-0.3199	0.1178	-0.7947	-0.3485	-0.3271	0.0255	0.4385	0.163	0.0953	0.1966	-1.0527	-0.5474	-0.0024	0.9511	0.0024	0.9223	0.2327	0.3723
A4D1B5	GSAP	Oncology	-0.4086	2.195	-0.0581	-0.1094	-0.8276	0.6397	-0.7421	-0.2626	-0.4313	-0.5643	-0.7509	2.7585	0.3031	-0.5853	0.8539	-0.5548	2.1951	-1.1948	0.9289	5.7218	1.2135	0.7698	3.0237	0.5466	-0.4111	-0.4132	0.3432	-0.5227	0.8886	-0.6838	-0.3913	0.1313	1.4199	-0.2076	0.7294	3.6254	0.2211	0.6189	-0.0944	0.0266	0.948	1.0395	-0.0266	-0.5706	0.2013	5.3684	0.56
A6BM72	MEGF11	Cardiometabolic_II	0.3807	-0.0547	0.4679	-0.1118	-0.4028	0.3118	-0.0301	-0.3542	-0.0207	-0.1415	-0.1601	-0.0627	0.081	-0.1952	-0.0966	0.4376	-0.4118	-0.0271	0.7024	0.0823	1.8037	1.182	0.0395	-1.0967	-0.1218	0.3054	0.1346	0.3846	0.056	0.1805	-0.1627	0.5466	0.015	-0.0163	-0.2808	0.8195	2.1975	0.0115	0.2147	-0.3363	-0.3525	-0.4421	-0.554	-0.3906	0.7859	-0.1554	0.0872
A6NC86	PINLYP	Inflammation_II	0.0383	-0.6019	0.4075	0.3034	-1.154	0	0.392	0.9857	-0.1051	0.24	-0.9768	-0.2619	-0.7715	0.1586	0.3953	0.34	0.0641	-0.5809	-2.6557	-0.3404	0.4121	0.0549	1.2417	-1.3282	-0.2812	0.4577	0.3654	-1.5759	0.1177	0.733	-0.4212	-1.0769	0.3764	-1.0093	0.6536	0.1009	0.5341	0.4629	0.1018	-0.4756	-0.1705	-0.8958	-0.7073	0	0.4085	-0.8334	0.3853
A6NCE7	MAP1LC3B2	Cardiometabolic_II	0.22	-0.0812	-0.0339	-0.1966	-0.5654	-0.1438	6.7589	0.6174	-0.3212	0.0421	-0.3611	-0.3175	0.1903	1.2081	-0.4131	0.1457	-0.1703	-0.3312	0.0486	-0.3863	-0.4305	-0.4551	2.6775	0.0064	-0.0237	1.0921	0.1098	0.1985	0.3247	-0.1955	0.004	3.4686	0.5072	-0.5029	3.0308	-0.004	-0.0111	-0.6818	0.3007	-0.7416	-0.774	-0.5734	-0.0169	0.7727	0.2036	0.4195	0.1097
A6NDB9	PALM3	Cardiometabolic_II	-0.2458	0.0723	0.1907	0.2074	0.1681	-0.6925	-0.256	0.0625	-0.7625	0.1202	0.1392	-1.2872	-0.3806	-0.7044	0.5043	-0.3061	1.4102	0.2811	-0.5134	0.2221	-0.8666	-0.0039	1.0765	-0.5446	0.5239	1.8538	-0.4974	0.3676	0.4591	-0.2475	0.1548	1.0901	-0.2617	-0.4995	0.7436	0.4155	-0.1381	0.0729	0.15	-1.1667	-0.3175	0.1215	-0.2864	0.6622	0.3782	0.3367	-0.0705
A6NFN3	RBFOX3	Neurology_II	-0.8589	0.1913	0.041	-0.7688	-0.0756	-0.2663	-1.0306	1.0698	-0.1692	-0.0291	-0.0548	0.406	0.7745	0.5645	-0.4468	0.0155	-0.6422	-0.3203	3.614	-0.561	-0.6399	3.7863	-0.1924	0.3535	1.1574	1.4773	1.3077	1.6757	2.6766	2.8953	1.1316	0.6951	-0.7984	-0.2444	-0.6465	6.3339	0.3135	-0.7299	-0.41	-0.8456	-0.2797	0.5951	-0.5991	2.4158	3.819	-0.0174	0.2268
A6NGG8	PCARE	Neurology_II	0.6679	-0.3642	-0.2264	0.0849	1.1278	0.0955	0.0774	3.1672	-0.6837	-0.6239	-0.1216	-0.408	0.3505	-0.4513	-0.245	-0.5283	0.0547	2.427	0.0265	0.3037	5.7947	-0.1779	-0.0043	-0.1317	0.4619	0.8536	-0.8885	0.1323	-0.4872	-0.8683	-0.0519	-0.1528	-0.3923	-0.3035	-0.1878	0.0885	0.5791	1.2316	0.8291	-1.0162	-0.4968	-1.1842	-0.2547	-0.118	0.1597	-0.3712	0.0043
A6NGN9	IGLON5	Oncology_II	0.0571	0.2954	1.1565	-0.2702	-0.1093	-0.2714	-0.1286	8.7035	9.6864	0.3731	-0.1586	-0.5016	-0.0127	0.3884	0.307	0.4132	3.8123	0.0243	0.8268	-0.2625	0.3086	-0.0194	0.0134	-0.0542	-0.2908	0.0673	-0.1844	-0.1225	2.5068	-0.0047	-0.1449	0.2251	-0.1557	-0.0002	-0.0845	0.188	-0.037	-0.1183	0.2485	-0.5815	0.0312	-0.2265	-0.7074	-0.0771	-0.4787	1.0297	0.0093
A6NHS7	MANSC4	Cardiometabolic_II	-0.2472	-0.2647	-1.9217	0.7652	0.0214	-0.2813	0.7076	-0.063	0.0845	0.4216	-0.8024	0.7864	-0.0209	-1.2338	-0.4906	-0.6788	-0.0839	0.2663	0.4112	-0.6139	2.2672	-1.4965	2.0487	-1.364	-1.1762	3.238	1.148	-0.7707	1.0646	1.83	3.8577	1.6967	-0.2463	0.8123	0.5431	0.3936	2.1387	-0.9451	-0.0033	1.0583	-0.9389	-0.8994	0.6731	-0.4155	1.2918	0.2207	-1.1165
A6NI73	LILRA5	Cardiometabolic	-0.4761	-0.0737	-0.7611	-0.0293	0.2402	0.3828	-0.7551	0.4745	0.0889	-0.277	0.5742	0.6	0.5589	0.3521	0.1095	-0.0949	0.298	-0.0436	0.8432	0.1915	-0.5796	0.0344	-0.2077	-0.5343	0.6568	-0.0018	0.2438	0.1484	0.4198	0.1719	-0.6246	0.4767	-0.4199	-0.1905	0.3045	0.7868	0.1455	-0.7193	0.0061	-0.7496	-0.3039	0.0004	0.0179	0.1974	-0.0411	-0.6776	0.078
A6NLU5	VSTM2B	Oncology_II	-0.1011	0.1151	-0.3526	0.3747	0.3918	-0.0614	-0.7065	0.2233	-0.7925	-0.6219	0.3647	-0.6801	-0.8958	-0.6728	-0.1271	-0.1336	0.1501	-0.3172	0.2578	-0.547	0.274	-0.9754	-0.004	-0.2734	0.1087	1.0034	-0.5558	0.1648	0.4328	-0.184	2.3329	0.662	-0.4067	-0.2189	0.4981	0.7668	0.1054	1.7025	-0.0815	-0.4872	-1.1974	-0.0133	1.9957	0.535	0.1695	0.2497	-0.7216
A6NM11	LRRC37A2	Oncology_II	-1.1646	0.6613	0.0109	0.4775	0.0303	-0.017	0.1748	-0.3389	-0.5022	-0.4844	-0.1422	0.2832	0.0823	-0.7584	-0.858	0.8464	-0.3691	-1.0307	-0.2336	-0.5291	-0.6066	0.205	0.0382	-1.0704	-0.0542	-0.578	0.4946	-0.2612	0.7982	-0.1021	-0.1811	0.1643	0.6692	-0.0522	-0.2295	2.4382	-0.6182	0.1793	0.9923	-0.0109	0.5177	-0.4494	0.0625	0.1006	0.8827	0.1506	0.0885
A7E2Y1	MYH7B	Oncology_II	0.1386	-1.0467	-0.2304	-0.429	0.5064	-1.0482	-0.4865	0.0231	0.3131	-0.2127	-0.5924	0.0014	-0.0222	-0.4369	0.7885	-1.0686	-1.8936	0.6634	0.2385	-0.5052	-0.6007	-0.2696	0.1299	0.0563	0.2332	-0.6142	0.6014	-0.4966	-0.6897	-0.1312	-0.1755	1.7325	0.5599	0.0656	0.1325	0.0754	-0.0415	-0.088	-0.084	0.3681	-0.6056	0.0464	-0.5677	-0.2228	-0.6202	-0.5269	0.4004
A8MTB9	CEACAM18	Oncology_II	-1.1439	0.5425	0.0264	0.0596	1.0699	-0.4148	0.0072	0.0817	-0.5755	1.9133	0.3767	-0.4586	-0.5172	-0.6895	0.4922	-0.2068	-0.2767	-0.6598	0.1552	-0.2315	0.0664	0.0421	0.2213	-1.1866	0.893	1.4112	-0.2604	1.6243	0.3151	-0.5464	-0.271	-0.1788	0.2587	-0.2998	0.1491	0.4755	0.382	0.0897	-0.4924	-2.7276	0.1231	-0.8641	-0.5858	1.6795	-0.1845	0.8669	0.0012
A8MVW0	FAM171A2	Neurology_II	0.0103	5.2776	2.7039	-1.6641	-0.9412	-1.3479	-1.8475	2.5539	-1.2346	0.0508	1.7839	-1.7189	0.0023	-2.3351	-1.1981	-1.5033	-1.2634	1.1331	-1.2054	-0.8003	0.3989	-0.6594	1.8745	-0.445	-1.8856	0.4927	1.1489	-0.5033	1.3894	-0.5371	-0.0329	1.9101	-0.9327	-0.0428	2.1796	-0.0555	-1.1686	0.2277	1.806	-2.0912	1.0677	3.9716	0.0574	0.5807	0.2627	0.2893	0.1822
A8MVW5	HEPACAM2	Neurology_II	0.8371	0.1075	-0.3659	0.1166	0.2896	-0.4603	-0.2063	-0.7095	-0.4404	0.1794	-0.3021	-0.1514	-0.6416	-0.4579	-0.8201	0.2022	0.2752	-0.7449	0.4844	0.0552	0.2588	0.4242	0.3995	0.2989	0.3104	-0.6077	-0.1249	0.0628	0.3904	-0.0415	0.1508	0.9281	0.2632	0.2857	0.6522	2.5646	-0.0873	0.4976	-0.2238	0.3462	-0.1594	-0.2451	1.3254	-0.5507	-0.2079	-0.7375	-0.7453
A8MVZ5	BTNL10	Oncology_II	-0.3789	-0.5758	-0.2729	-0.2785	0.1549	-0.5265	-0.7188	-0.1675	0.4675	-0.4131	-0.0904	0.9521	0.4985	0.7046	-0.0975	0.1033	1.23	0.295	1.4418	0.5488	0.0534	0.2662	-0.4966	-0.3273	-0.9516	0.1776	-0.1318	-0.0746	-0.0819	0.1989	-0.4151	-0.0086	0.0954	-0.2794	-0.4866	0.5674	0.4247	-0.0833	0.0546	-0.1501	-0.2091	-0.4389	-0.1108	-0.3198	0.1621	-0.6994	-0.7017
A8MYV0	DCDC2C	Oncology_II	-0.3448	1.2098	0.3239	-0.0366	-0.4711	0.5244	0.5445	0.5464	0.2939	-1.2352	0.0442	-0.6065	-0.3486	-1.8417	1.5595	-0.3174	-0.9124	-1.6637	1.6006	-1.862	0.1464	-0.872	0.0109	-0.4122	-2.1239	2.4842	-0.7028	0.6767	-0.5137	0.0163	0.4894	1.2617	-0.6098	-1.083	0.139	-0.3596	-0.3355	-0.3688	-0.3393	-0.917	0.7641	1.4625	0.3384	0.6934	0.9763	-1.0603	0.8947
B0FP48	UPK3BL1	Oncology_II	2.1609	0.1476	0.2713	-0.4675	-0.0033	-1.0986	1.6822	0.857	0.1467	0.1199	0.1486	-0.7772	-0.9636	-1.2171	0.3137	-1.3904	-0.1026	1.76	0.6273	-0.1792	0.0074	0.0918	1.0025	0.1922	-0.5937	-0.6363	-0.1929	0.2306	1.0724	0.1573	0.8974	0.1383	0.9088	0.7587	-0.8499	0.1332	-0.3188	-1.3117	-0.2411	-1.2404	-0.0417	0.3236	-0.2151	0.7783	-0.227	1.0063	-0.6349
B1AKI9	ISM1	Inflammation	0.1906	-0.049	-0.0179	0.2731	-0.1976	-0.0235	-0.4011	-0.2914	-0.2534	0.594	-0.9408	-0.0969	0.5038	0.1071	-0.1233	-0.3533	-0.0015	-1.1149	-0.1302	-0.0969	-0.6053	-0.0168	0.4476	-0.1914	-0.1932	0.3801	-0.1481	0.2307	0.5005	1.169	0.1217	0.0015	-0.0696	0.2098	-0.7022	1.0356	0.3182	-0.3934	0.1819	-0.7893	-0.2735	0.1514	-0.4566	-0.145	0.4727	0.3495	-0.0732
B2RUY7	VWC2L	Neurology_II	-0.0261	0.074	-0.3291	-0.2896	-0.3638	0.1161	0.2044	-0.0174	-0.1024	-0.4394	0.3665	0.5066	-0.3935	0.4713	-0.0182	1.4233	-0.1818	-0.266	0.5861	0.8047	-0.0973	-0.2624	0.1564	-0.2033	0.1105	0.2071	-0.0124	0.2289	0.0848	0.49	-0.2204	3.2047	-0.2061	0.063	-0.0914	0.7109	-0.2066	-0.0352	0.518	-0.188	-0.4545	-0.2734	0.0934	0.0883	1.3721	-0.2034	-0.0139
B6A8C7	TARM1	Neurology_II	-0.0715	1.8732	-0.949	-0.3432	-0.4204	-0.2157	-5.1739	-0.2503	-0.1776	1.3287	0.2508	-0.7943	1.2383	-0.3579	3.3866	-1.1064	-2.5127	-0.1908	0.5384	-1.8155	-0.8281	-1.3071	-0.4511	-0.4028	-0.9092	0.4757	-1.0638	-0.0354	0.1619	2.8989	-0.1187	0.0709	-0.2524	-0.087	1.6148	1.2047	-0.6855	-1.4322	2.9144	-1.0539	-1.2371	0.1567	-0.0543	0.7582	0.3181	-0.6017	0.241
B6SEH8	ERVV-1	Cardiometabolic_II	-0.5771	0.14	-0.5244	-0.2609	0.2242	-0.0854	0.0358	-0.2627	-0.4013	-0.0329	0.4825	-0.2007	-0.6976	-0.6502	0.3931	-0.5051	-0.2199	-0.4278	0.1651	0.2153	0.1892	0.2022	1.1423	-1.1374	0.6694	0.0109	0.0858	0.0589	0.2569	0.5936	0.3034	0.9247	-0.2708	0.0357	-0.2568	0.1262	-0.0271	-0.0017	-0.11	-0.971	-0.7534	0.0615	-0.5151	0.1411	-0.043	0.2163	-0.4414
E2RYF7	HCG22	Cardiometabolic_II	-1.3346	1.192	0.5575	2.6497	1.2701	0.0232	-0.7159	0.4473	-1.3079	-0.5434	-0.9434	-1.4754	0.8597	-0.3561	-0.0094	0.3082	2.6135	-1.3321	-0.0156	0.2932	-0.4871	2.9676	-0.9291	-0.6238	0.4591	1.1656	-1.2703	0.3746	-0.6823	1.7096	0.5329	1.4811	0.6448	-0.7618	-0.868	-0.525	-1.3764	-1.7152	0.2333	-1.216	-1.0392	-0.6714	-0.8521	0.0898	-0.3054	0.9781	1.0315
I3L3R5	CCER2	Cardiometabolic_II	-0.466	-0.7257	-0.1002	0.8795	-0.898	0.389	0.4477	0.0292	-0.7275	-0.406	-0.9429	-0.3144	0.4565	0.8879	0.3095	-0.6772	-0.3175	-0.9611	0.1264	-1.6867	-0.4624	0.0855	0.0857	0.2866	-0.419	1.6319	0.533	0.0854	-0.1969	3.2213	0.0166	0.7085	0.5672	-0.906	0.1801	-0.084	1.3116	-0.6305	-0.6221	-0.7581	0.2442	-0.2544	-0.5649	-1.2498	1.1804	-1.0168	1.065
NTproBNP	NT-proBNP	Cardiometabolic	-0.8367	-0.0221	2.6372	-0.6832	2.0808	0.2823	-1.3395	-0.1095	-0.5309	1.6048	-0.3953	-0.5132	0.975	1.8613	-1.1341	-1.7959	-1.0784	-0.673	1.8865	-1.6274	0.1703	4.48	-0.0343	-0.7524	-0.6029	5.8993	-1.0679	0.9368	3.6747	5.5722	-0.2799	-0.0104	-0.3438	2.9479	1.5579	-0.4935	1.2668	-1.9869	1.0288	-1.128	0.3371	2.4842	-2.5659	0.0104	1.0242	1.2956	-1.2823
O00148	DDX39A	Inflammation_II	-0.2823	-0.5002	0.2077	-0.185	-0.4659	0.0552	0.1237	0.1592	0.1171	-0.1739	-0.3044	-0.1735	-0.2264	-0.1592	-0.0623	0.2689	0.1017	-0.5284	-0.1476	-0.2067	-0.3056	0.2965	-0.3035	0.245	0.0994	0.3815	0.4879	0.2835	0.1782	0.3535	0.4365	-0.3191	0.1282	0.6707	-0.011	1.3071	0.2219	0.4376	-0.2152	-0.2627	-0.0045	-0.4456	-0.3316	0.0656	0.5503	0.0518	-0.136
O00161	SNAP23	Cardiometabolic	1.6113	1.9216	-1.4108	0.9391	1.0472	0.5478	-0.6309	3.0126	0.2719	-1.225	-0.7951	0.8672	0.8269	-0.6755	-0.408	-1.6876	-1.38	-0.4229	-0.2304	-0.7828	-1.7032	0.0533	-0.7216	0.1089	0.4151	-0.0812	0.4296	-0.0575	1.7675	-0.0462	0.8997	-0.8394	0.7728	0.7453	3.5423	0.0462	-0.1524	4.897	-1.0881	0.9456	0.8102	1.8597	-0.7903	-0.827	1.5625	-0.2566	-0.254
O00175	CCL24	Inflammation	-0.3581	-0.5767	0.1671	0.0608	1.2632	0.6596	0.6545	-0.9752	-0.7753	-1.2503	-0.1838	-0.9412	0.0279	0.0185	-1.016	0.1155	1.7977	1.1509	0.4846	-1.6919	-1.3121	0.7153	0.1857	-0.3384	0.1054	-0.5354	-0.8815	-0.1561	0.5401	1.2443	0.5303	2.1733	0.5748	-0.3493	1.0541	0.9268	0.4658	0.5059	0.5209	-1.072	0.7884	-0.4214	-0.8637	-0.3847	-0.4542	-1.3545	0.0571
O00182	LGALS9	Inflammation	-0.4115	0.4628	-0.1192	-0.5212	-0.1831	0.1247	-0.415	0.1534	-0.8098	-0.1368	0.1005	-0.0645	0.331	0.4312	-0.2905	-0.2241	-0.3606	-0.7142	1.5547	-0.1781	0.1386	0.804	-0.1079	-0.9728	0.3482	1.0329	0.7076	0.3972	1.1149	1.1343	1.019	0.243	-0.2635	-0.0924	0.3954	1.0695	1.0021	-0.1391	0.1907	-0.4751	0.0278	0.1365	0.0124	-0.1631	0.6395	-0.5156	-0.2542
O00186	STXBP3	Oncology	2.0433	0.8239	-0.7017	0.3166	0.6547	1.0189	-0.5955	-0.5369	-0.5369	0.0219	-0.7401	-1.0599	-0.18	0.1002	0.1565	-0.4077	-0.2253	-0.9453	0.1379	-0.7091	-0.8721	-0.1863	-1.0694	-0.5761	0.3884	0.1324	0.5054	-0.2644	1.2081	0.42	1.1556	-0.9828	0.1546	-0.6441	0.4508	0.0923	0.3479	2.4471	-1.0943	-0.1642	-0.1449	-1.1062	-0.1692	-0.5697	0.2792	-0.0219	-0.7301
O00194	RAB27B	Cardiometabolic_II	2.3841	1.8841	-1.7857	0.0969	2.033	-0.3468	-0.7503	1.6634	0.1498	-1.0201	-0.5676	1.8154	1.4	-0.6855	-0.153	-1.5381	-1.8047	-0.4606	0.1934	-1.1762	-1.6485	0	-0.534	0.3159	0.8389	-0.3481	0.3643	0.2158	2.4995	-1.3178	0.3969	-1.6663	-0.8419	0.3604	3.5849	-0.2987	-0.3678	3.8057	-0.1734	1.5342	0.5468	-0.9912	-1.1033	-1.6726	2.8339	-1.5571	-0.3949
O00203	AP3B1	Oncology_II	-0.2456	-0.2438	-0.3028	-0.194	0.3487	0.0379	-0.9019	0.1863	-0.027	0.0092	-0.1904	-0.2583	-0.2684	-0.258	-0.3144	-0.4371	-0.238	-0.4568	4.1614	0.0836	0.0843	0.747	0.3582	-0.2546	0.1137	0.2763	0.2064	0.28	0.7179	1.2316	0.0039	0.9739	-0.5786	-0.7315	0.5538	2.1419	-0.0793	1.3133	0.1523	-0.4081	-0.4056	-0.5359	0.0154	0.0954	0.7285	-0.2439	-0.5388
O00206	TLR4	Inflammation_II	0.0015	0.2208	-0.3291	0.236	-0.2716	-0.3851	0.054	0.3295	0.4471	-0.2566	-0.2381	-0.217	0.3749	0.1459	-0.6713	0.4171	-0.4359	-0.2522	0.2595	-0.4458	-0.1928	-0.5059	0.0791	-0.2932	0.5479	0.1292	-0.4622	-0.6759	0.4456	-0.5942	0.2003	0.0811	0.0866	0.2372	0.1965	0.6156	-0.0015	0.0661	-0.3778	-0.2348	-0.4522	-0.132	0.2104	0.136	0.0762	-1.0925	0.3742
O00214	LGALS8	Neurology	0.5489	0.217	-0.374	0.2138	0.3495	0.0859	-0.2596	-0.2554	-0.166	0.1107	0.2436	0.1431	-0.0321	-0.1279	0.1628	-0.3922	-0.6658	-0.7361	0.5534	-0.2634	-0.2367	-0.2658	-0.1331	-0.019	0.5971	-0.1795	0.4441	0.0552	0.1405	0.0671	0.3009	0.1716	-0.6605	-0.624	0.9634	1.8876	0.2577	1.4388	-0.2008	-0.1885	-0.0314	-0.0303	-0.0923	-0.0291	0.5133	-0.6005	-0.0047
O00220	TNFRSF10A	Neurology	-1.1366	-0.2443	-0.0247	-0.1783	0.0043	-0.2063	-0.5074	0.8	-0.3607	-0.0043	-0.3358	0.4515	0.1261	0.739	-0.4882	-0.5502	-0.3829	-0.5174	0.8923	0.3166	-0.3482	1.8099	0.1715	-0.2345	0.49	0.8727	0.4268	0.3297	0.6023	1.9813	-0.0845	1.0898	-0.4619	-0.0599	0.907	0.5913	0.6435	-1.4065	-0.027	-0.5494	-0.0659	0.1916	-0.7502	-0.0866	0.5156	0.1102	-0.633
O00221	NFKBIE	Oncology	1.5418	0.0337	-0.1184	0.4209	-0.1698	0.1797	-0.4916	-0.176	-0.4435	-0.0923	-0.0021	0.0724	-0.0125	0.3261	0.685	0.1852	-0.5507	-0.6733	1.3235	0.0573	-0.1978	0.4041	-0.2578	-0.7108	-0.2883	0.9098	0.0016	0.3548	0.6271	1.475	0.7274	-0.201	0.4119	1.3407	-0.0304	1.6252	0.3055	0.4731	-0.7729	-1.2162	0.3199	-0.2935	0.3722	-0.5739	0.4501	0.1643	-0.1461
O00233	PSMD9	Oncology	0.2985	1.2927	0.3203	0.4367	-0.0731	1.5903	-1.6415	0.0313	0.4828	-0.5458	-0.2387	-0.2126	-1.148	-0.2749	0.5874	0.4124	0.4471	-0.2745	2.9228	0.0644	-0.5036	-0.0624	0.2158	0.2369	-0.0313	0.0686	-0.7427	-0.1707	0.9525	1.7606	0.7087	0.1852	-0.5566	-0.0935	-1.117	0.842	1.4027	-0.3422	-0.5547	-1.1703	1.6659	-0.9519	1.1425	-0.4784	-0.0605	0.5472	-0.6197
O00241	SIRPB1	Inflammation	-0.434	-0.2115	-0.2084	-0.2248	0.5409	0.8445	-1.0087	0.5455	-0.5605	0.0117	0.075	0.2175	-0.3414	0.3486	0.176	-0.3663	-0.0264	-0.6744	0.1642	-0.3578	-0.8861	0.404	0.4144	-1.1168	0.2994	1.9068	-0.2292	-0.0313	0.9611	2.169	0.2807	0.7341	0.0648	1.1825	-0.4471	-0.1616	0.3657	-0.3347	0.3084	0.0312	-1.0764	0.5013	-0.6395	0.1099	0.5477	0.0853	-0.8962
O00244	ATOX1	Oncology	1.0315	0.1331	-0.2043	0.9414	0.3772	1.1455	-0.1854	-0.2169	-0.7179	0.3409	-0.3985	-0.034	0.1645	0.1927	0.1948	-0.3368	-0.3177	-1.3379	1.7781	-0.4784	-0.9506	1.3275	-0.5707	-0.5062	-0.3455	1.242	1.2358	0.7366	1.3232	2.902	-0.0417	-0.1201	-0.6051	-0.0084	0.8093	1.3513	1.284	1.5963	-0.4661	-0.683	0.2562	-0.0666	-0.3878	-0.6818	1.1603	0.1651	-0.3875
O00253	AGRP	Inflammation	-0.0834	0.2955	0.1806	-1.4001	-1.1268	0.0816	0.3216	-0.451	-1.0927	-0.4529	-1.2832	0.3366	-0.6482	-0.2577	-0.8764	0.8377	-1.4659	-1.3071	0.2696	-0.7831	-0.5502	1.0734	-1.0151	-0.5731	0.4572	1.9671	0.9035	0.3397	0.5646	1.2077	-0.7637	0.3757	-0.7483	-0.511	1.0728	1.4736	0.2446	0.4158	-0.2062	-1.1754	-0.3973	0.2776	0.1526	0.0319	1.5881	-0.7877	-0.1791
O00273	DFFA	Inflammation	0.666	-0.2145	-0.4026	0.5434	0.1035	1.0759	-1.0809	-0.4126	0.0195	-0.2524	-0.4476	-0.4599	-0.4528	-0.5597	0.4566	-0.4684	-0.2798	-0.851	2.3996	-0.0456	-1.0126	0.1156	-0.07	-0.2667	-0.1871	0.1725	-0.1325	-0.1893	0.6848	1.0394	0.6792	0.8909	-0.033	0.3257	-0.1744	2.3193	0.6645	1.3136	-0.7406	-0.4307	0.4996	0.3126	0.3949	-0.5628	0.1903	-0.0443	-0.457
O00291	HIP1	Cardiometabolic_II	0.2942	0.0694	-0.4537	0.2747	0.1962	-0.1396	-0.3457	-0.3278	-0.2655	-0.0942	-0.289	-0.18	-0.0023	1.3922	1.3241	-0.1781	-0.2584	0.2256	0.4806	-0.5835	-0.0713	0.1222	-0.1752	-0.4051	-0.1935	0.7685	-0.4023	0.6866	0.3276	0.7169	0.7353	-0.0664	0.1387	-0.3624	-0.265	1.7913	-0.059	0.0483	0.307	-0.9056	-0.3362	-0.3774	-0.0559	-0.0659	0.7887	0.1057	-0.0079
O00292	LEFTY2	Oncology	-0.4768	0.2403	0.38	0.4056	-0.7998	0.2733	0.4003	-0.7562	0.0967	-0.6273	0.0058	0.696	-0.9112	-0.6607	-0.6836	-0.7882	-0.469	-0.9319	-0.3291	-1.3683	0.0328	-0.5714	0.4581	-0.4004	0.6973	0.1516	0.5658	0.669	1.6361	0.4029	-0.2317	-0.8188	-0.3278	-0.332	-0.6583	1.2789	0.8352	0.7145	-0.0888	-0.3299	-0.1265	0.0416	1.0871	-0.9045	1.2665	0.3463	-0.17
O00300	TNFRSF11B	Inflammation	-1.0286	0.5491	-0.0866	-0.0142	0.1929	-0.4048	-0.1197	0.4605	0.1637	0.2268	-0.7634	0.5163	0.3395	0.0607	-0.4433	-0.4336	-0.2225	-0.6412	0.7178	0.1275	-0.1872	0.913	0.7739	-0.5112	0.2006	0.8994	0.0618	0.5007	0.9167	0.9013	-0.0604	0.1569	-0.6364	-0.8287	0.2155	1.9482	0.2278	-0.8323	0.6425	-0.7568	-0.4647	-0.0342	-0.0949	-0.7399	0.356	-0.0033	-0.7789
O00308	WWP2	Neurology	0.013	0.3879	-0.2038	0.9197	0.1189	0.5106	-1.0959	-0.2236	0.1435	-0.2472	-0.2862	-0.2804	-0.2822	-0.0378	0.439	-0.068	0.0121	-0.2477	1.2784	0.4479	-0.7196	-0.1684	0.2486	-0.4571	-0.3191	-0.3818	0.3508	-0.3637	0.115	0.5859	0.8866	0.5727	-0.1117	-0.1578	-0.1701	3.0717	0.7607	1.5948	-0.8819	-0.349	0.4259	-0.0121	-0.0168	-0.1587	0.1701	-0.06	0.0494
O00337	SLC28A1	Oncology_II	3.5314	0.1228	-0.3875	0.5658	-0.0118	8.7776	-1.7849	-0.046	0.1341	0.9933	-0.9928	-0.7388	-0.6919	-0.1827	-0.9095	-0.5975	-0.0206	-0.1166	4.6703	0.2862	0.1841	0.4825	1.1324	-0.2853	-0.3661	0.0318	2.0618	0.4445	-0.9007	-0.3705	-0.918	-0.6741	-0.4937	-0.5167	0.6074	0.1317	-0.173	0.445	0.9336	-0.1803	-0.2802	-0.4774	-0.7968	-0.002	-0.4667	-0.8436	0.1567
O00339	MATN2	Inflammation	-0.5086	0.6106	0.1228	0.0151	0.5789	-0.0665	0.2219	-0.0699	0.1408	0.074	-0.1038	0.131	0.1477	0.0382	0.1542	0.1612	-0.0567	-0.3642	-0.0771	0.1245	-0.5294	-0.2175	-0.0603	-0.2189	0.3574	0.7402	0.0886	0.3802	0.7047	0.9259	0.0443	0.1263	-0.1312	-0.3574	-0.4389	1.7071	0.1898	-0.0198	-0.0643	-0.2804	-0.1707	-0.323	-0.3767	-0.0686	0.3945	0.0259	-0.1716
O00391	QSOX1	Inflammation_II	-0.6208	0.2153	0.6502	-0.0361	0.5214	0.0324	-0.3071	0.8364	0.0208	-0.0951	0.0287	0.1762	-0.1078	0.2129	-0.3217	0.1222	0.1355	-0.4106	0.0046	0.1628	0.1245	0.36	-0.9117	-0.4942	0.282	-0.0267	-0.0082	-0.1958	0.4341	0.6201	0.158	-0.0635	-0.6278	-0.1476	-0.3121	0.8877	0.1309	-0.3507	0.3259	-0.1812	-0.0046	-0.2695	-0.0439	-0.1675	0.1858	0.0691	-0.3143
O00399	DCTN6	Neurology	-0.2492	0.0811	-0.7524	-0.2132	-0.1839	0.0378	-1.6713	-0.1845	0.5165	-0.2801	-0.0356	-0.2799	0.0135	-0.0613	-0.3132	-0.2609	1.4857	-0.0676	1.6464	-0.0841	-0.1744	-0.4023	-0.3387	-0.9967	-0.5071	1.6522	-0.1082	-0.1484	0.0355	0.3146	-0.164	1.0665	-0.3873	-0.4446	1.3056	2.3034	0.8456	1.293	0.1412	-1.2825	-0.0135	0.0448	1.683	-0.0777	0.7239	-0.1777	-0.4118
O00401	WASL	Inflammation_II	1.9577	2.5837	1.8554	-2.0606	2.6064	-1.0176	0.8041	0.5516	1.5499	0.2509	-0.8315	-0.6376	-4.2283	3.106	3.6547	0.3001	1.3542	-0.2382	-1.705	-0.9972	0.3764	2.0909	1.114	-0.2016	-4.574	-1.7767	-0.3827	0.7653	2.4381	-0.5989	-0.9697	-1.3875	-0.3209	0.9915	-0.4348	-0.7726	-0.3525	-0.4201	-0.9186	-1.9853	-2.8407	-0.2249	3.4207	-0.8935	1.1697	2.7464	-1.0584
O00422	SAP18	Oncology_II	1.1441	-1.6939	1.6661	0.5346	-0.2443	-0.3007	0.1595	0.679	-0.2777	-0.4895	-0.3528	-0.3483	-1.4913	-1.0208	-0.2819	-0.6216	-0.3543	-0.93	0.0775	0.0588	-0.2024	0.9979	2.959	4.2269	0.0268	-0.4387	-1.4524	1.7227	4.6103	1.7173	0.1091	-1.3275	-0.7772	0.3806	0.1821	0.0323	0.8102	-0.9031	0.657	-0.2224	-0.1277	1.1758	-0.8927	-1.0612	-0.1903	0.0052	1.3506
O00425	IGF2BP3	Cardiometabolic_II	0.4496	-0.3158	-0.1702	0.1952	-0.0731	0.0601	0.3382	-0.0104	-0.4705	-0.5622	-0.6003	-0.5591	-0.7476	-0.929	-0.2276	-0.0925	-0.2732	-0.3758	1.1397	-0.174	1.6896	0.719	-0.0835	-0.1145	-0.2424	-0.3493	-0.2649	0.1607	0.5174	0.2041	0.0104	0.9037	1.2584	-0.2611	0.3571	2.3434	-0.2056	2.6262	0.1835	-0.0509	-0.4949	0.1744	0.1191	0.0933	0.3851	-0.4066	-0.6416
O00451	GFRA2	Oncology	-0.1768	-0.181	0.1441	0.0808	0.1072	0.079	0.0807	0.1528	-0.5593	-0.0829	0.0471	0.118	-0.2614	0.1515	-0.2517	-0.2252	-0.254	-0.4724	-0.1485	-0.1887	-0.8022	0.3532	-0.1991	-0.3672	0.2829	0.1283	-0.397	0.0296	-0.0406	0.3979	0.1766	0.4107	-0.41	-0.4698	-0.1829	-0.0798	0.1528	-0.2009	-0.1988	0.0205	-0.3987	0.2884	0.2061	0.0776	0.1658	0.1334	-0.2927
O00468	AGRN	Inflammation	-0.2929	0.8713	-0.1746	-0.2845	0.326	-0.0744	-0.2592	-0.1649	-0.3178	-0.0788	-0.3719	0.7667	0.5964	0.467	-0.1451	-0.0222	-0.1596	-0.5456	0.39	-0.1834	0.0911	1.0788	-0.1833	-0.7982	0.3366	1.6191	0.9289	0.1719	0.8772	3.1932	0.359	-0.5647	-0.6757	-0.2755	0.0271	0.9464	0.3106	-0.4522	0.5781	-0.497	-0.161	-0.5173	0.3099	0.0627	1.3696	-0.2473	-0.3802
O00533	CHL1	Cardiometabolic	-0.0252	0.5919	0.0743	-0.0535	0.0661	0.1903	-0.2542	0.4691	-0.166	-0.0565	-0.0052	0.534	0.8518	0.0641	-0.147	0.3151	-0.1879	-0.5506	0.2428	0.1354	-0.3456	0.5458	0.03	-0.6139	-0.0983	0.1442	-1.2588	0.1047	0.0244	-0.1455	-0.2507	0.2943	-0.0844	-0.2616	-0.3628	0.9176	-0.2675	-0.3708	-0.063	-0.0842	-0.0409	-0.0711	0.6384	-0.4072	0.298	0.3836	-0.4032
O00534	VWA5A	Oncology_II	1.2923	-0.3756	2.1787	1.6103	0.7096	0.6502	3.3771	-0.2838	-0.0494	1.0067	-0.6846	-1.0168	-0.5263	-0.3318	-0.6496	0.8414	-0.3115	0.6432	0.1693	0.3906	1.649	-0.343	4.8524	1.0572	0.6181	-0.0776	-0.6931	0.2249	-0.0078	-0.9139	0.7146	0.7859	-0.0761	-0.226	-0.8555	0.5511	0.1407	-0.0367	0.5089	8.881	-0.0935	-0.3089	-0.097	-0.1321	1.2674	-0.9482	0.855
O00548	DLL1	Oncology	-0.5589	0.3737	-0.1395	-0.0491	0.4643	0.2498	-0.3856	0.6245	-0.4014	-0.1514	0.1867	0.5463	0.1582	0.1516	0.2443	0.1449	-0.4633	-0.4266	0.6391	-0.4065	-0.9288	0.4955	0.0194	-0.584	0.8858	0.8788	0.3225	-0.2379	0.7701	1.4796	0.0324	0.7592	-0.3468	0.1859	0.4598	2.1575	-0.2128	-0.5402	-0.1864	-0.5225	0.0763	-0.2917	-0.4807	0.0591	0.7095	0.0469	-0.3784
O00559	EBAG9	Neurology	1.7365	0.0623	-0.8514	0.7454	0.6373	0.6969	-1.0514	-0.373	0.1474	-0.197	-0.6118	-0.5829	0.5646	-0.4662	0.3064	-0.9477	-0.3195	-0.7556	1.6295	-0.6334	-0.5707	0.231	-0.1759	-0.7441	-0.2535	0.0655	0.0094	-0.0589	0.2968	0.2064	0.437	0.2312	-0.2031	-0.5184	1.7866	1.2621	0.1319	2.8936	-0.4505	-0.4306	-0.0986	0.4494	-0.6302	-0.1863	0.45	-0.72	-0.2874
O00567	NOP56	Cardiometabolic_II	-0.7331	0.0646	4.4	3.9845	0.4008	0.4001	-0.538	-0.1143	0.694	-0.6488	-0.4074	0.2847	0.905	1.6166	-0.5813	-0.2912	0.1476	-0.3446	-0.3971	-0.8066	-0.1507	0.8984	0.5305	1.0074	-0.3673	0.4933	-0.2985	3.0004	-0.349	-0.0141	0.6085	1.7111	0.0005	-0.9986	0.7956	-0.7388	-0.1852	0.0835	0.1543	-0.4496	-0.7951	-0.5989	1.9847	0.7969	-0.172	0.9898	1.3111
O00584	RNASET2	Cardiometabolic	-0.2038	0.5382	0.2994	-0.126	0.241	0.1218	-0.2593	0.2599	-0.2551	-0.2875	-0.1972	0.3103	0.1662	0.1956	-0.2042	0.0305	-0.4185	-0.6911	1.0046	-0.1603	-0.7283	0.3591	-0.2649	-0.4274	0.402	2.0463	-0.0297	-0.0056	0.666	1.1758	0.2908	0.1881	-0.1614	-0.1332	0.0923	0.2668	0.6275	-0.1846	0.0282	-0.3264	-0.2332	-0.0279	0.1289	0.089	0.7406	0.0767	-0.2578
O00585	CCL21	Inflammation	-0.2883	0.4666	-0.0519	2.5298	0.4218	-0.7589	0.0394	-0.2276	-0.3488	4.2495	0.0602	0.2664	0.2562	-0.0096	0.3842	0.2308	0.0921	-0.0586	-0.5161	-0.5846	2.7304	-0.1145	-0.1583	-0.2268	0.2157	1.2899	0.0046	-0.1013	0.2572	0.4025	0.2202	-0.2456	0.194	0.141	-0.0307	-0.726	0.2663	-0.047	0.3168	-0.6633	-0.2802	-0.8046	0.0874	0.1974	0.4576	0.3386	0.516
O00592	PODXL	Oncology	0.2522	0.0067	-0.0388	-0.1274	0.0576	-0.0374	-0.2038	0.1314	0.053	0.056	0.0659	0.238	-0.1128	-0.0575	-0.0844	-0.0245	0.2671	-0.2399	0.0126	-0.2411	-0.0653	0.0631	-0.1067	0.0961	0.093	-0.0988	-0.2521	0.1921	0.1793	0.0518	-0.024	0.0312	0.0661	0.1951	-0.2032	-0.1559	-0.0426	-0.2402	-0.0265	-0.3804	0.1871	-0.2374	-0.0804	-0.0258	-0.2668	-0.2567	0.1032
O00602	FCN1	Inflammation_II	-1.0673	0.9836	-0.8318	-0.2719	-0.2746	-0.0518	-0.4262	0.4095	0.3577	0.1643	0.236	0.5364	-0.0613	0.5881	-0.2245	-0.4901	0.2271	-0.2608	0.7072	1.2	0.1308	0.0746	-0.06	-0.0196	0.3325	0.1527	0.767	0.5572	1.0512	0.872	-0.0207	-0.4139	-0.6417	-0.2301	0.2473	0.5076	0.908	-1.0075	-0.6792	-0.7273	0.3462	-0.4325	-0.4539	0.5365	0.3445	-0.7907	0.9016
O00622	CCN1	Oncology	0.2177	2.2964	1.9691	-1.0969	-0.3196	-0.1043	1.2004	-0.4056	-0.594	-1.0695	-0.8933	-0.6808	-1.9741	-0.3805	-2.1516	-0.2249	0.4544	-1.8094	-0.2131	-0.6259	0.5749	0.9147	-1.3937	-1.4696	-0.2693	-0.0871	0.1914	1.22	1.7065	-0.2585	-1.574	0.7304	-0.8552	-1.1959	1.9477	0.6341	0.5592	0.9309	0.231	-1.7255	0.2546	-0.6778	1.1603	-1.2496	-0.4146	-1.0848	0.3194
O00626	CCL22	Inflammation	-0.4317	1.4816	0.0396	-1.4379	-0.1759	-0.769	-0.562	0.4929	-0.4723	-0.5238	-0.145	0.7285	-0.0606	0.6945	0.5822	0.1107	0.5353	-1.1819	-0.7808	0.259	1.0906	-0.4345	-0.5193	-0.3628	0.7775	0.3535	0.8653	0.3921	0.4986	0.5858	0.314	-0.3549	-0.3222	-0.4179	0.7114	-0.1875	-0.4931	0.389	-0.3562	-1.0587	0.3035	-0.7449	-0.2733	-0.2621	0.7236	0.742	-0.5557
O00748	CES2	Oncology	-0.5747	-0.2289	-0.0449	0.1657	0.2084	0.1136	-0.0596	-0.2746	0.4683	-0.2007	-0.0967	1.5545	-0.6699	-0.1025	-1.0457	0.0377	-0.267	-1.1778	-1.0846	0.2517	-0.3086	0.8122	-0.6544	-0.8878	0.9022	-0.8634	1.0599	0.5023	0.2263	0.7036	-0.4496	-0.0434	0.382	-1.1249	-0.4276	-0.0347	-0.0758	-0.5817	0.8608	-0.9697	-0.5597	-0.9098	1.0825	-0.9233	-0.2204	-0.0035	-0.0709
O14503	BHLHE40	Neurology_II	-0.3132	-0.6475	-0.3182	0.2233	1.4092	0.0263	-1.6327	-2.0637	-0.3815	-0.2176	0.4464	-0.4783	-0.6894	0.0102	3.7441	-2.6167	-0.0518	0.3217	2.3577	1.3526	0.7373	-0.8542	-1.4266	1.4261	0.9416	-0.0722	-1.7607	1.0886	-1.5825	0.5829	0.8019	0.2135	-2.5313	2.3181	1.4039	0.5382	2.3026	0.8411	-0.3116	-6.0626	-1.5277	-0.0933	-1.3355	0.1537	0.8675	1.5979	0.8417
O14523	C2CD2L	Neurology	-1.1398	-0.0299	-0.3978	-0.0923	0.2323	0.1324	-1.133	-0.3088	-0.5685	0.3417	-1.4819	-0.0361	0.5897	-0.3655	0.0277	-0.1293	-0.8412	0.1706	1.6963	-0.013	0.7119	0.5666	-0.0473	0.2081	0.1475	0.2208	0.0651	0.1631	0.8817	0.1674	0.503	-0.297	-0.2003	0.5939	0.0908	1.9554	0.4662	0.3244	-0.3238	-0.5324	-0.0303	-0.061	-0.5518	-0.235	0.7907	0.3819	-0.3128
O14530	TXNDC9	Neurology_II	1.022	-0.0455	-0.124	0.2126	-0.341	0.3677	0.119	-0.0803	-0.1741	-0.3036	-0.1565	-0.0122	-0.1505	-0.2537	0.0309	-0.2169	-0.3104	0.6706	0.4315	2.4908	-0.1054	-0.3574	-0.2181	-0.1455	-0.2504	-0.1654	-0.0576	-0.1621	-0.086	0.2233	-0.56	-0.1419	-0.1657	-0.1543	0.3174	0.3759	0.0285	2.2325	0.1798	0.3522	-0.0528	-0.3071	0.4545	1.5233	0.1471	-0.2302	-0.3064
O14558	HSPB6	Oncology	-0.7922	1.6572	0.8654	-0.1694	0.0937	0.3678	0.4915	-0.3681	-0.7317	-0.2258	-0.2019	0.0726	-0.9346	-0.0173	-0.5351	0.35	-0.5593	-0.4877	0.9467	-0.4109	-0.6436	1.0609	-0.4171	-1.3786	0.7784	1.0976	0.3838	-0.0755	1.2837	2.3851	0.0013	0.8437	-0.2432	-0.1826	-0.4224	0.9408	0.8516	-0.1921	-0.3919	-0.5831	-0.2393	-0.4278	0.0602	-0.9708	-0.0645	-0.1405	-0.905
O14578	CIT	Neurology_II	-0.1743	-0.3771	-0.1446	-0.489	-0.4337	0.7627	-0.9516	0.3606	0.1886	-0.1635	-0.097	-0.0059	-0.0347	-0.1323	-0.0765	-0.1348	0.0059	-0.0757	3.2251	-0.0355	0.1087	2.2081	-0.6713	1.5049	0.256	0.2071	0.4625	0.9983	1.0421	1.2876	0.8847	-0.1504	-0.4449	0.3695	-0.2002	6.3848	0.7432	0.0727	-0.2721	0.8044	-0.16	0.0758	0.1936	0.7001	2.5439	-0.1048	-0.177
O14579	COPE	Neurology	2.0438	0.1638	0.5707	-0.1469	-0.3742	0.5516	-0.3866	0.2586	-0.4982	-0.3183	-0.9183	-1.5169	0.0195	-0.3838	0.4841	-0.1662	-0.7116	-0.0377	-0.0864	-0.6981	0.213	-0.8926	0.1184	1.6214	-0.7098	-0.7002	0.3535	0.4628	0.4727	-0.0383	0.2781	0.7175	-0.3342	0.9582	0.8891	1.1489	-0.0698	-0.4754	-0.7259	-1.3788	0.4619	-0.0425	0.4758	0.2012	0.3553	1.1091	-0.7093
O14594	NCAN	Neurology	-0.372	-0.3108	0.0571	0.5496	0.3452	0.556	0.4391	0.1614	-0.0137	-0.182	0.8838	0.8413	-0.6185	-0.7028	-0.9113	-0.3956	0.4429	-0.8828	0.9634	-0.3068	0.2771	-1.1412	0.2791	-0.3425	0.5831	0.0561	-0.176	-0.241	0.4776	0.5467	0.1101	-0.1583	0.0392	0.1885	-0.1139	-0.5582	-0.313	-0.1158	0.4751	0.2099	-0.6854	-0.5628	-0.2764	0.5571	0.2114	-0.08	-0.5388
O14618	CCS	Neurology	0.2569	0.078	-0.3062	0.2533	-0.4528	1.0341	-1.3196	-0.1751	0.5125	-0.1255	-0.0658	-0.2491	-0.6064	-0.1488	0.9182	0.1949	0.5798	-0.0746	1.7365	0.5898	-0.4456	-0.2589	0.1247	0.0028	-0.3991	0.3109	-0.53	0.0019	1.0259	0.9151	0.7925	0.48	-0.2752	-0.006	-0.3245	0.4549	1.3582	0.6009	-0.1552	-1.4464	0.9603	-0.7841	1.0566	-0.0019	-0.6054	0.7347	-0.0838
O14625	CXCL11	Neurology	0.2849	0.2414	-0.3036	-0.9399	-0.3786	0.9592	-1.287	0.2547	-0.3005	0.3773	-0.8909	0.1373	0.2401	-0.6774	-1.2027	-0.1533	0.3305	-2.0587	1.3273	-0.8375	0.0673	1.537	0.3627	-1.0973	0.7707	0.5193	-0.1659	-0.063	1.0251	-0.9141	0.8741	-0.6627	-0.0386	-0.0224	2.1099	0.5653	0.4763	1.0969	-1.5158	-0.3474	-0.1681	-0.5776	0.1298	0.211	1.084	0.2337	-1.3051
O14662	STX16	Oncology	0.2237	1.7065	-0.8322	-0.8213	-0.1706	1.2506	-0.5133	-1.1717	-0.7973	-0.68	-0.9204	-0.6538	0.317	-0.8951	0.4821	-0.2512	-0.4898	-1.1115	1.5755	-1.1763	0.919	0.4777	-0.1206	-1.226	0.0278	0.8484	-0.126	-0.6322	0.8083	0.7721	-1.1971	0.8021	0.9423	0.0939	-0.5977	0.688	-0.077	1.624	-1.532	-1.1198	0.4104	-0.5332	-0.2148	0.2402	1.8789	0.4073	0.2904
O14713	ITGB1BP1	Oncology	-0.3408	0.1614	-0.0539	0.3776	-0.4915	0.6913	0.1075	-0.1561	-1.2023	0.3599	0.0066	-1.1491	-0.0066	-1.8059	-0.0642	-0.5371	0.3193	0.308	-1.0161	-0.3058	0.2093	0.3905	-0.2176	-0.3082	-0.3063	1.1588	0.2276	-0.5831	0.5836	0.4237	0.2543	-0.7422	0.6574	0.1566	-0.7415	1.9285	-0.7156	0.7431	-0.4685	-1.9452	0.3688	-0.0123	-0.0642	0.4973	0.1395	0.2004	-0.041
O14717	TRDMT1	Oncology_II	1.8224	0.4323	1.6401	0.2232	0.0124	0.5454	-1.2361	-0.6288	-1.0618	1.5299	-0.5378	0.018	-0.5341	-0.3124	0.2664	-0.9051	-1.3052	-0.1695	0.1517	-0.2446	0.5692	-0.5923	0.5529	-0.6972	-0.067	-0.3879	0.04	0.3244	-0.003	-0.369	0.7497	0.3204	-0.6483	-0.8699	1.4381	-0.4352	-0.1375	1.949	-0.4525	-0.4641	-0.3685	-1.2437	-0.5354	0.2658	0.3639	-0.8457	-1.9206
O14737	PDCD5	Neurology	0.0389	-0.0709	-0.3831	0.1651	-0.3517	1.2792	-1.3449	-0.2145	0.4317	-0.2017	-0.3408	-0.554	-0.4348	-0.6639	0.5162	-0.206	0.0952	-1.0349	2.9536	-0.0107	-0.5487	-0.0477	-0.0641	-0.1438	0.1679	0.8891	0.3348	0.2676	1.3327	2.5537	0.7255	0.0107	-0.899	-0.2636	0.1393	2.6596	1.7228	0.8891	-0.2493	-1.1034	1.7805	-0.5616	0.6343	-0.0585	0.438	0.3215	-0.396
O14745	SLC9A3R1	Inflammation_II	1.3127	-0.5028	0.142	1.0178	0.8571	0.5669	-1.3244	1.8725	-0.525	0.4822	-0.8761	2.1509	0.082	-0.3431	-0.6192	-0.3162	-0.5323	-1.1316	0.4477	-0.4047	-1.2851	-0.123	0.5963	-0.8063	-0.5699	0.7817	-0.0205	0.3834	0.6176	0.6191	0.5572	0.0353	-0.1569	-0.2167	0.8523	1.099	-0.0192	2.4216	-0.8137	-0.3772	0.1018	-0.3539	-0.9133	-0.2915	0.6312	-0.5133	-0.2568
O14763	TNFRSF10B	Neurology	-0.9667	-0.2141	0.057	-0.5639	0.2283	0.0271	-0.8063	0.2633	-0.7497	-0.3362	-0.1258	0.4747	0.9461	0.3467	-0.5164	-0.0065	-0.2839	-1.3413	1.0871	-0.2179	0.0418	3.1336	-0.0473	-0.5902	0.1808	1.7594	0.7237	0.4899	0.4302	2.0684	-0.0622	0.4741	-1.0851	0.2656	0.1275	1.0956	0.2681	-0.8448	-0.6676	-1.1784	-0.4448	0.3474	-0.4441	0.0065	1.3662	0.076	-0.6365
O14773	TPP1	Inflammation	-0.1277	0.127	0.1413	-0.2475	0.4131	-0.687	-0.3874	0.5176	-0.0031	0.2841	-0.5665	0.4274	-0.0126	0.6339	-0.1152	-0.1233	-0.3169	-0.4518	0.0168	0.0827	-0.6068	-0.3573	-0.6482	0.0766	0.2346	0.0411	0.0981	-0.1865	0.6174	-0.0487	0.3623	-0.0247	-0.2352	0.2081	0.6223	0.5335	1.121	-0.3651	0.3362	-0.4488	0.2505	-0.2087	0.1322	-0.2032	0.7581	0.3488	-0.4165
O14786	NRP1	Cardiometabolic	-0.2627	-0.0368	0.2098	0.3219	0.3834	-0.0502	-0.3504	0.3405	0.1113	-0.0025	-0.1375	0.1425	0.0901	0.3041	0.2248	-0.2195	-0.4668	-0.2257	0.4994	-0.1562	-0.7175	0.526	-0.3226	-0.8098	0.2421	0.0132	0.2526	0.3505	0.2962	0.3996	-0.0247	0.7056	0.0025	-0.212	-0.2621	1.0543	0.181	-0.2555	-0.0537	-0.3451	0.3257	-0.0634	-0.0298	0.234	0.8901	0.2044	-0.2858
O14788	TNFSF11	Inflammation	0.6401	0.192	2.1316	-0.3244	1.744	-0.1974	0.4998	-0.9752	0.0085	-0.6741	-0.2728	0.183	-0.266	-0.4626	1.3304	-0.5278	-0.2969	0.2503	-1.4377	-0.5068	-0.1662	-0.539	0.3337	-0.3173	0.4212	-0.1567	-0.665	-0.5592	1.2184	-0.0085	0.1982	-0.8014	1.0566	0.7029	-0.9344	0.3662	0.0354	0.9957	0.1403	1.2012	0.8419	-1.4424	0.3195	1.4864	-1.0664	0.1275	1.1851
O14791	APOL1	Inflammation_II	-0.6965	1.1602	0.2188	-0.2648	-0.1794	-0.4478	-0.2175	-0.6605	2.1565	0.1777	0.4906	-0.0039	-0.0636	-0.2109	-0.2205	0.2183	-0.8054	-0.1181	-0.5018	1.1832	3.4665	-0.8968	-0.2492	-0.1594	0.0572	-0.9975	0.3835	-0.0806	0.9153	-0.1992	-0.6538	-0.0688	0.043	-0.3213	0.8073	0.915	0.5058	0.1269	-0.4902	0.0195	-0.2777	-0.5124	0.0039	0.3412	0.4214	-0.4243	0.2271
O14793	MSTN	Cardiometabolic	0.614	0.1596	0.1837	1.0644	0.6002	1.1771	0.2	-0.1299	-0.1081	-0.1802	-0.6998	-0.7557	-2.4719	-0.975	0.2452	1.0213	0.1239	-0.0588	-3.0674	-0.442	-0.8189	-2.2635	-0.7982	-0.0462	1.2771	-0.0266	0.0037	-0.7315	0.2895	2.3666	-0.9561	-1.4851	0.7728	-0.7471	-0.8575	-1.0578	0.5523	0.2556	0.4182	0.4764	-0.0573	-0.3556	0.0509	-0.2977	-1.0882	0.3342	0.4277
O14798	TNFRSF10C	Cardiometabolic	-1.1971	0.3863	-0.1322	-0.4388	0.7207	0.3763	-1.5813	0.6422	-1.1786	-0.0387	0.3465	-0.263	0.3506	-0.3567	0.0377	-0.9749	0.6637	0.0071	0.3487	-0.9702	-0.0337	0.3636	-0.6452	-0.1265	0.3865	0.3882	-0.0071	-0.6632	-0.0839	0.7309	0.6098	-0.2226	0.2079	0.0262	-1.7761	-0.4072	0.1532	-1.5575	0.0557	-0.3678	-0.0194	0.15	-0.7251	0.4643	0.6484	-0.3672	0.4113
O14828	SCAMP3	Oncology	-0.3663	0.2244	-0.1328	-0.3073	-0.2698	0.0907	-0.8652	0.3928	0.1257	-0.0331	-0.6165	0.0934	0.3615	-0.0126	-0.1502	-0.5909	-0.5892	-1.1577	2.1033	-0.4988	-0.5552	0.9473	-0.1907	-0.3058	-0.0657	1.184	0.346	-0.5264	1.3966	2.3187	0.0384	-0.6038	-1.0325	0.4574	0.8536	2.3658	0.6578	2.1682	-1.2269	-0.609	0.1508	-0.532	-0.5611	-0.2918	1.3852	-0.6423	-0.2715
O14836	TNFRSF13B	Inflammation	-0.4167	-0.156	0.0932	-0.3628	0.0009	-0.1227	0.5306	0.0132	-0.443	0.0083	-0.032	0.5401	0.8592	1.9093	0.0084	-0.7023	-0.0348	-0.7285	1.6797	-0.3056	-0.2605	0.2998	-0.8061	-1.328	0.0886	1.1735	0.447	-0.0593	0.3923	0.9794	-0.0142	0.2781	-0.3782	2.4349	-0.686	0.061	0.1431	0.3276	-0.3818	-0.2323	-0.3278	-0.8597	-0.2471	0.2903	0.0733	0.3153	-0.3793
O14841	OPLAH	Cardiometabolic_II	0.0267	0.1531	0.069	-0.0072	-0.3242	-0.0148	-0.4664	-0.1003	0.6476	0.0703	-0.6918	-0.3006	-0.4744	-0.4887	0.1216	-0.2883	0.1025	-0.0768	0.832	-0.2559	-0.0594	0.6538	0.0537	-0.2848	-0.1057	0.1478	-0.3608	1.7294	0.0014	-0.228	0.2507	2.2819	0.1237	-0.7489	0.3291	2.0062	0.2708	1.2378	-0.0602	-0.5501	0.474	-0.2233	-0.0123	0.0426	0.3183	-0.1198	-0.1104
O14867	BACH1	Inflammation	-0.2317	-0.3514	-0.0635	0.3589	0.1423	0.1517	-0.6763	0.0196	0.4014	-0.2194	-0.121	0.0706	0.1149	-0.3622	0.5839	-0.2061	-0.3356	-0.3242	1.4924	-0.1904	-0.3767	-0.4918	-0.1503	0.1122	-0.2319	0.4304	-0.417	0.1317	0.2412	0.7414	1.2492	0.1118	-0.162	0.2087	0.1824	1.8033	0.8549	0.7189	-0.3152	-0.5575	0.8549	-0.5999	0.1263	-0.0888	0.0859	-0.1188	-0.561
O14879	IFIT3	Oncology_II	-0.2113	0.5652	0.2295	0.8118	-0.0242	-0.8066	-0.3302	-0.0609	-0.4557	-0.0143	0.1505	-0.437	0.4007	-1.1711	0.588	-0.811	-0.1743	-0.2802	-0.2737	-0.1651	-0.1989	-0.7758	0.4135	-0.2088	0.2152	-0.0425	-0.0094	0.0204	0.028	-0.2154	3.254	0.0911	0.0947	-1.1653	0.1513	0.4043	0.1754	0.4859	0.0562	-0.1766	0.1682	-0.3095	-0.6336	0.2319	0.2206	0.2383	-0.5331
O14904	WNT9A	Inflammation	-0.2256	-0.2779	0.0477	-0.1736	0.0315	0.0596	0.0117	0.0544	0.0551	-0.074	0.1479	0.6078	-0.1545	0.2014	-0.2104	-0.162	-0.3724	-0.6667	0.2747	-0.472	-0.8429	0.5751	-0.1521	-0.2829	0.7634	1.1833	0.8287	0.2797	0.8821	2.373	0.0629	0.67	-0.5388	0.1932	-0.5707	-0.0117	0.2807	-0.1774	-0.3209	-0.5336	-0.0859	-0.1647	0.3221	-0.5678	0.84	0.404	-0.5219
O14917	PCDH17	Cardiometabolic	0.1232	0.0675	0.8761	0.1389	0.7694	0.3203	-0.467	0.7114	0.1962	0.5013	-0.264	0.347	-0.1378	-0.2911	-0.7215	0.0771	-1.0502	-0.477	0.5629	-0.4367	-1.1032	0.9031	-0.0974	-0.0644	0.4059	0.2579	-0.082	0.0646	0.9284	0.991	-0.2227	-0.1031	-0.1377	0.2675	-0.4376	2.971	0.1762	-0.4772	0.325	-0.5361	-0.0142	-0.034	0.4282	-0.101	2.4449	0.3004	-0.3986
O14933	UBE2L6	Cardiometabolic_II	-0.2516	-0.297	-0.185	-0.2364	-0.2585	0.5334	-1.2513	-0.3195	-0.55	-0.3756	-0.0207	0.1308	0.4523	0.1482	-0.1398	0.2594	-0.2363	-1.1215	2.1106	0.5978	-0.5647	0.3745	0.0452	-0.7651	0.4532	0.9339	0.0385	0.3312	1.0262	1.9718	1.2828	0.6974	-0.2043	-0.2512	-0.3154	2.2023	0.3303	0.5192	-0.751	-0.8303	0.3441	-0.5156	-0.1871	-0.7277	0.8932	0.1929	-0.4631
O14944	EREG	Neurology	0.5487	0.0796	0.0145	0.1928	0.3469	-0.6117	-0.7556	0.7528	-0.3122	0.0128	-0.4948	2.7036	-0.267	-0.3247	-0.6342	0.1761	-0.4355	-1.0197	0.275	-0.5043	0.7979	0.9213	-0.2534	0.0519	0.4968	0.2489	-0.3509	-0.7636	0.571	0.1378	-0.6079	1.0734	-0.0099	-0.7892	0.7811	-0.1823	-0.0732	0.7209	0.1111	-0.3433	0.3864	-0.2207	-0.7591	-0.623	-0.4875	-0.1985	0.1373
O14958	CASQ2	Cardiometabolic_II	-0.025	0.8141	-0.1819	0.2398	0.0763	-0.7723	-0.3743	0.5083	0.3063	0.1947	-0.2479	-0.5541	-0.6763	-0.4984	1.136	5.4882	2.8795	0.1053	-1.0683	-0.3281	-0.2817	-0.8304	0.2163	-0.4728	-0.3249	-0.6192	-0.2962	0.5204	0.133	-0.9121	-0.0004	-0.534	0.5327	-0.4265	-0.5306	0.9609	-0.0578	1.0012	0.4668	-1.3388	-0.7774	0.158	-0.7514	0.268	0.2293	0.1428	-0.4447
O14960	LECT2	Cardiometabolic_II	-0.6499	0.888	-0.698	-0.4624	-1.4776	-1.1039	2.2245	0.1813	0.5435	-1.3369	-0.9332	-0.1953	-1.1758	1.487	-0.9182	-1.7445	-1.2569	-2.3073	-0.1671	-0.4436	2.4515	-1.615	-0.4435	-1.035	1.3253	1.8564	1.5345	1.5518	1.8793	0.6298	0.5512	-0.7137	-0.0409	-0.6182	0.6438	-0.7299	0.2543	-1.0496	-0.4971	-0.8196	-0.2423	0.0409	-0.952	-2.5851	1.9695	0.9575	0.3985
O14964	HGS	Oncology	0.9003	-0.3769	-0.4263	0.4343	-0.143	0.624	-1.3903	-0.2503	0.2741	-0.7426	-0.453	-0.492	-0.4144	-0.4961	0.4027	-0.1635	-0.7116	-0.1878	2.6262	0.0162	-0.5352	0.5901	-0.5018	-0.1311	-0.2731	0.1639	-0.2875	-0.2581	0.5464	1.1122	0.2836	-0.3796	0.037	-0.5193	0.4294	0.7092	0.9147	1.8708	0.7671	-0.6633	0.9505	-0.6725	0.7181	-0.7884	3.1997	0.0786	-0.3838
O14967	CLGN	Neurology_II	1.0623	-1.2337	0.3361	0.2864	-0.1968	-0.1855	-0.3497	0.864	0.4828	0.26	-1.0447	0.856	0.5621	0.0243	0.0248	-0.6705	-0.8465	-0.0784	-0.2057	-0.3896	-0.565	-0.4029	-1.0289	0.5071	-0.2729	0.7824	0.0744	0.789	0.4859	2.8237	1.0137	2.5775	-0.3111	1.0024	-0.6442	4.3488	0.3976	-0.7756	-0.972	0.349	-0.8489	0.4891	-0.3235	-0.4454	1.1715	-0.1982	0.6484
O14974	PPP1R12A	Oncology	0.9073	1.8068	-0.8177	0.7257	1.0286	0.7234	3.4546	0.2208	-0.4025	-0.6278	-0.5292	0.4869	0.2034	-0.7183	0.0792	-0.8769	-0.7261	-0.2898	0.0138	-0.4241	-1.1249	0.1548	-0.434	-0.2012	-0.3156	-0.0366	0.2197	-0.3317	0.9859	0.3025	0.6949	-0.4703	-0.3298	-0.0008	2.3398	0.9666	0.0008	3.5813	-0.6913	0.4965	0.6929	-0.6186	-0.1662	-0.519	1.261	-0.6649	-0.3739
O15013	ARHGEF10	Neurology_II	0.5968	0.3035	-0.4842	0.2445	0.0818	-0.074	-0.6165	0.2417	-0.4366	-1.0014	-0.5684	0.5371	0.5099	0.0232	0.3058	-0.8175	-0.9718	-0.7431	0.3925	1.9504	1.1708	0.2909	-1.0985	-0.1999	-0.8154	0.362	-0.0698	0.2353	1.9485	-0.258	0.6144	3.9273	-0.9739	-0.2676	1.8626	0.7582	-0.3832	3.561	-0.6064	-0.4222	0.733	-0.9406	-0.1214	-0.428	1.3214	-0.583	2.3513
O15018	PDZD2	Cardiometabolic_II	-0.2101	-0.3817	0.0155	-0.2628	-0.171	0.0752	-0.6156	-0.0118	-0.9151	-0.2613	-0.0636	-0.5221	0.1385	-0.3064	-0.1315	-0.576	-0.5004	-1.4251	0.4111	-0.121	-0.0238	0.405	0.1688	0.0113	-0.3286	1.2105	0.2147	0.6455	1.4348	1.6168	-0.3401	-0.9122	0.4832	-0.8603	0.416	0.8813	0.0941	1.5146	-0.1283	-1.3782	0.8889	-0.2351	-1.0675	-0.7497	1.232	-0.1277	-0.5516
O15020	SPTBN2	Neurology_II	-0.0644	-0.4985	0.0374	-0.4681	-0.486	0.3625	-0.1577	0.8713	0.2116	-0.3202	-0.4525	-0.22	0.3135	-0.0544	1.0136	-1.9468	0.3392	-0.3385	1.4721	0.1759	-0.0239	0.4129	-0.4358	-0.0087	-0.2775	-0.003	0.0668	0.1967	0.5479	0.8748	0.0876	1.8415	-0.3398	-0.1626	-0.2441	2.3171	0.1674	-0.0335	-0.4127	-0.5094	-0.7564	-0.8798	0.2875	-0.174	-0.0992	0.2484	-0.3335
O15031	PLXNB2	Cardiometabolic	-0.5412	0.4397	0.2471	0.1806	0.1597	0.1901	0.0105	0.1675	0.1769	0.3718	-0.1765	-0.1152	-0.0233	0.0708	-0.4352	0.1004	-0.1497	-0.3753	-0.1712	0.2681	0.0151	-0.1087	0.017	-0.4018	0.0976	-0.2393	0.2118	0.3987	0.586	0.7713	0.2792	-0.142	-0.4384	-0.0647	0.1638	0.7547	0.3344	-0.3709	0.9147	-0.4306	-0.0668	-0.0191	0.0935	-0.411	1.3172	-0.0857	-0.076
O15078	CEP290	Oncology_II	-0.3388	0.1972	0.0548	0.1641	0.6319	-0.7377	-0.1107	0.7346	0.3054	0.221	0.6754	-0.7489	0.0265	-0.0827	0.7092	0.143	-0.143	-0.2788	0.5146	0.1221	-0.1987	-0.7724	1.2386	-0.9518	-0.0949	-0.0074	-0.8092	0.8521	0.0674	-0.4328	0.7685	0.4589	-0.8356	1.9954	-0.0158	0.5852	-0.1882	0.0259	0.0537	-1.1327	-0.1885	0.115	-0.1898	0.2082	0.9025	-0.5754	-0.2559
O15083	ERC2	Neurology_II	1.6392	2.1573	0.4389	0.636	1.3188	-0.492	0.0856	-0.0298	-0.4621	1.4527	-0.299	-0.2919	0.3944	-1.8745	-0.6106	-0.0909	-1.7316	-0.1268	0.5368	1.2544	0.1023	1.6522	-0.7639	-0.8158	0.6158	0.0164	-0.1126	-0.3646	-0.5763	-0.6268	0.113	0.7567	0.2312	-0.7101	1.095	2.3836	0.9321	0.9029	3.462	-0.0164	-0.7767	-4.939	0.0829	-0.2312	0.5059	-0.4012	0.462
O15116	LSM1	Oncology	-0.3182	0.7283	-0.346	-0.1128	0.1256	-0.2951	-0.79	0.6008	-0.1537	-0.221	-0.1233	-0.5671	0.0483	-0.2634	-0.0981	0.0193	0.8144	0.3473	0.6815	-0.2807	-0.0193	0.1547	0.3766	-0.462	-0.1075	-0.4865	-0.5828	0.4496	0.2258	0.137	0.1659	0.8198	0.7732	-0.7888	0.0287	0.9045	0.2064	-0.1921	0.6573	-0.3473	-0.2374	-0.5449	-0.3247	0.0671	-0.137	0.2421	-0.0572
O15117	FYB1	Neurology	2.4164	1.4523	-1.2999	1.5647	1.743	1.7875	-0.5387	0.5447	-0.1429	-1.2716	-0.4132	0.494	-0.244	-0.6446	0.3127	-1.2525	-1.4182	-0.3669	0.4029	-1.1269	-1.9617	-0.7014	-0.718	-0.1402	-0.8713	-1.1966	0.2777	-0.0707	1.6165	-0.5717	2.4021	-1.0875	0.0454	-0.0727	3.0944	-0.009	0.0579	4.6188	-0.4209	0.1678	1.6226	-1.2121	-0.352	-0.227	1.7497	-1.2331	-0.483
O15123	ANGPT2	Oncology	-1.1189	0.1689	0.7053	-0.7107	1.1578	-1.1018	0.2404	-0.2925	0.2146	0.135	-0.5675	-0.1946	0.8235	-0.1786	-0.3918	-0.6169	-0.3723	-1.0537	0.6922	0.5733	-0.8563	1.2662	-0.423	-0.7873	-0.233	1.3148	0.5555	0.5089	1.0586	0.8645	0.7515	0.2478	-0.3128	-0.4124	-0.0614	1.5681	-0.3315	-0.8272	0.4882	0.4908	0.1166	0.6848	-0.5366	0.6641	0.1627	-0.6691	0.2663
O15164	TRIM24	Oncology_II	-0.2693	0.342	0.5265	0.1838	0.3552	-1.2019	1.0743	0.1778	0.0663	0.3329	-0.4421	-1.5665	0.6255	-1.0781	0.8701	-0.4178	-0.3624	-0.0963	0.5407	-0.4361	-0.8794	-0.0242	0.542	-0.935	0.1651	-0.4642	0.6462	0.7849	0.463	-0.0123	0.784	0.5911	0.0149	-1.0758	0.1514	2.4903	0.3299	-0.1588	-0.257	0.2317	0.2692	0.2701	0.2056	0.4602	0.4346	0.5707	-0.0321
O15169	AXIN1	Inflammation	0.8427	0.5365	-0.7	0.4442	0.3803	0.2574	-1.0841	-0.0506	-0.1511	-1.1513	-0.4064	0.3033	0.2684	-0.1807	0.0378	-0.768	-1.0475	-0.8159	0.8405	-0.8098	-0.9942	0.2718	-0.7727	-0.1087	-0.2868	0.645	0.117	0.3498	0.8626	0.9387	0.7774	-0.3427	0.5765	0.1439	1.7346	0.9872	0.2522	2.6816	-1.1562	-0.4851	0.7615	-0.984	0.0928	-0.3624	1.1634	-0.2261	-0.6003
O15182	CETN3	Oncology_II	0.9545	0.0988	0.065	0.3578	0.266	0.4669	-0.0096	0.075	0.2361	-0.2894	-0.164	-0.0613	0.0263	-0.1267	-0.0579	-0.3187	-0.3415	-0.3979	0.7681	-0.1507	-0.3614	0.5784	-0.1832	-0.1203	0.0331	-0.0914	0.2952	0.0799	0.4205	0.0245	0.36	0.1059	-0.0263	0.0388	-0.1252	5.205	-0.0401	1.6739	-0.3601	-0.0606	0.0643	-0.1514	0	0.2008	1.1995	-0.5244	-0.0954
O15197	EPHB6	Neurology	-0.5191	-0.3673	-0.2771	0.033	0.8106	0.0512	-0.065	0.0974	-0.5822	-0.3096	0.1132	0.4605	-0.0226	-0.1393	0.0516	-0.3444	-0.2331	-0.8795	0.3133	-0.6877	-0.4751	0.2394	0.1221	-0.8293	0.7592	0.95	0.0716	-0.1483	0.7862	1.9275	0.3711	0.3859	-0.2744	0.1942	-0.6581	-0.0422	0.168	-0.3448	-0.6068	-0.7785	-0.421	0.1146	-0.4844	0.0168	0.383	0.4418	-0.4045
O15211	RGL2	Oncology_II	-0.195	0.5113	-0.5292	-0.6182	1.614	0.063	-0.4615	-0.1462	1.3273	-0.045	0.0786	-0.9957	-0.8895	-0.2664	0.1583	-0.6783	0.0464	0.7617	-0.6242	-0.5915	0.0744	0.0075	-0.5289	-1.5759	0.3029	-0.1945	-0.6722	0.3597	0.3181	0.3568	-1.3293	3.4778	-0.1758	0.4068	0.6119	1.1414	-0.4824	0.2427	1.7096	-1.9556	0.6319	-0.7226	0.1954	-0.4946	0.0356	-0.8581	-0.4538
O15212	PFDN6	Neurology_II	-0.2315	-0.143	1.1104	-0.7988	-0.5608	-4.0195	-2.7083	-7.3542	-0.8192	2.2205	0.1064	1.619	0.7379	-0.8785	2.3385	-0.4728	-0.2916	-0.417	0.9623	-0.552	0.0262	-2.2276	-1.626	-1.8233	-0.5372	-0.1116	-0.4518	0.6592	0.0148	-0.3186	-1.8983	-0.0631	0.2998	-0.6293	0.4786	0.362	-0.29	0.3555	0.0245	-0.9379	-0.0342	0.9837	-0.6899	0.9676	-3.1806	-0.9916	-0.433
O15213	WDR46	Oncology_II	-0.5016	0.7409	-0.117	-0.7138	-0.7151	-0.3142	-0.4958	-0.2048	-0.9339	-0.2008	-0.4831	-0.0423	0.1893	0.0408	0.0132	-1.1822	0.075	-0.878	1.9467	-0.0864	-0.2508	2.5142	-0.7954	-0.6371	0.7658	0.4218	0.8596	0.1826	0.906	0.6169	1.4882	0.0268	-0.3134	0.557	-0.522	4.0617	0.9504	-0.7177	-0.4766	-0.9937	0.0913	-0.1853	0.5805	1.85	0.9699	-0.8826	-0.3269
O15232	MATN3	Neurology	-0.4523	-0.3089	0.0658	0.0201	0.422	-0.3088	0.1497	0.3126	-0.1441	-0.6675	-0.3118	0.0664	0.5295	0.1813	-0.8925	0.1262	-0.3449	-0.3292	1.1731	-0.0352	-0.6187	1.2884	0.3856	-0.2579	0.0247	0.2308	-0.0147	0.3282	0.9407	1.0366	0.0841	-0.6807	-0.8237	-0.6211	-0.3957	0.5004	0.4147	-0.503	-0.8689	-0.0419	0.0752	-0.0897	-0.7282	0.3916	0.5129	-0.0073	-0.1635
O15234	CASC3	Neurology_II	1.1826	-0.4971	-0.4151	0.4434	-1.4562	0.6543	-0.116	-0.0589	-0.615	0.0024	-0.1514	-0.4427	-0.1087	-0.3808	0.3505	-0.8828	-0.0236	-0.3998	2.4588	0.3007	-0.7228	0.1634	-0.1373	-0.7748	0.6306	0.4815	-0.417	-0.0656	0.6286	1.283	0.1282	-0.3314	-0.3941	-0.3681	1.209	1.1168	0.8449	2.2336	-0.9373	-0.3222	0.6741	-0.3722	-0.1598	0.2027	0.5201	-0.3301	-0.7372
O15240	VGF	Neurology_II	-0.0838	-0.5886	-0.3655	0.1033	-0.077	0.0885	-0.0929	-0.7576	0.7454	-0.993	0.2122	0.4923	0.0736	-0.3358	0.0088	-0.3911	-0.1479	-0.7311	-0.1881	-0.1582	0.149	0.115	-0.3549	-0.4357	0.2428	1.1487	-0.3597	-0.0936	0.7112	1.8768	0.0189	0.5718	-0.3378	0.3177	0.5565	3.245	-0.1127	-0.4718	0.5245	-0.3234	0.0966	0.2713	-0.095	-0.2997	-0.2797	-0.5906	-0.8482
O15263	DEFB4A_DEFB4B	Oncology	-0.6078	1.8644	2.3864	-2.6859	-2.0044	-2.6824	-0.2405	-1.0456	0.8364	0.5103	-1.1031	-0.8148	-1.4221	-1.2681	-1.0261	1.3111	1.2385	-2.185	1.2911	-1.4739	-0.9045	1.0507	0.1703	-1.9745	1.9922	2.7938	-0.8468	1.7577	0.1976	-1.8701	-1.9555	1.9108	0.7731	-1.1784	3.1939	-1.3298	1.5849	1.3854	2.3559	-2.761	-1.4937	-0.0718	1.6792	-0.8891	-0.041	-2.2218	-0.4399
O15264	MAPK13	Oncology_II	-0.2492	-1.2435	0.3594	-0.9375	-0.3219	-0.9787	-1.2473	-0.3271	0.3921	0.1433	-0.418	0.3782	0.4298	-0.1093	-0.4753	0.3016	-0.4198	-0.8498	2.0085	0.1378	0.3115	2.3614	-1.0003	-0.9328	0.6568	1.2643	1.7452	-0.1032	1.9053	1.2299	2.1724	-0.3142	-0.4178	-0.074	0.7557	7.2224	1.2816	-0.7085	-0.1573	-0.4801	-0.1505	1.6232	-0.42	1.5506	3.3546	0.1927	0.7542
O15269	SPTLC1	Neurology_II	0.2748	-0.1305	-0.212	-0.3341	0.1267	-0.3895	0.016	-0.0373	-0.2934	0.21	0.0701	-0.0718	0.0006	-0.4336	-0.0602	-0.3151	-0.3393	-0.5074	1.0122	-0.0092	1.2459	1.3827	-0.3074	-0.5526	0.1576	0.5091	0.5437	0.685	0.6093	0.9714	0.7897	0.1573	0.829	-0.6594	-0.072	2.2891	0.2528	0.3874	-0.3726	-0.3467	-0.3334	-0.2666	0.3073	0.2698	0.9689	-0.3762	-0.358
O15305	PMM2	Cardiometabolic_II	1.4068	0.4088	-0.6093	-0.6624	0.2267	0.2223	-0.5894	0.5204	0.1029	-0.5905	-0.5878	-0.2151	-0.3126	-0.9341	0.0525	-0.4843	-0.2069	0.306	0.9458	0.1177	-0.366	-0.2312	0.1629	0.6217	-0.0911	0.2065	-0.1849	0.4274	0.5099	-0.3199	0.4873	0.3186	-0.6861	-0.6415	1.2446	1.302	-0.0978	2.3976	0.0598	-0.7179	0.1832	-1.1393	-0.3572	0.0072	0.3362	-0.1424	-0.3086
O15335	CHAD	Inflammation_II	-0.2319	0.6755	-0.0063	-0.3087	0.7646	0.1559	0.6495	0.1923	-0.7453	1.3288	0.5762	-0.1503	0.5489	-0.1961	-1.1458	0.6553	0.0084	-0.6933	-0.7134	0.0971	-1.2855	-1.4535	0.2885	0.215	-0.7135	1.5803	-0.7663	-0.736	0.6738	1.6708	-1.067	-2.0375	0.1425	-1.3113	-0.3878	-1.0902	-0.1589	0.0063	0.1289	-0.4504	0.4288	-0.9745	0.0063	-0.8982	0.8533	0.3432	0.9587
O15350	TP73	Neurology_II	0.3287	1.5179	0.0134	-1.0381	-0.0343	1.49	1.085	1.2129	0.9565	0.5311	-0.1494	-0.5272	-0.3089	-0.4049	1.9921	-0.3799	-0.0171	1.034	2.668	0.914	1.2159	0.9028	-1.2616	-1.0202	-0.897	-2.312	-0.2747	1.1691	1.7005	2.5131	0.8247	-1.2182	-0.0548	-0.4052	2.3823	2.4226	1.4177	-6.118	-0.365	-2.5894	0.1837	-0.6505	0.3122	0.7351	0.3903	-1.0236	1.6191
O15354	GPR37	Cardiometabolic	-1.1928	0.4269	0.0698	-0.31	-0.0681	0.6043	-0.3369	0.5598	-0.4559	-0.7523	-0.1541	-0.0919	0.0456	-2.0304	-0.2325	-0.3144	-0.8004	-1.2148	1.0471	-0.2483	-1.3292	1.3284	-0.5231	-0.7588	1.0075	3.197	1.833	0.5815	1.271	3.7272	-1.1856	0.031	-1.031	0.0483	0.758	1.7447	1.3404	0.6251	-0.1836	-1.4704	-0.6057	0.8129	-0.031	0.9242	1.706	0.0491	0.2019
O15357	INPPL1	Oncology	-0.3764	0.0929	-0.8728	-0.2799	-0.1404	0.3977	-0.676	0.3335	-0.3833	-1.0514	-0.9508	0.0596	0.2776	-0.2654	0.1578	-1.0462	-0.3954	-1.0185	1.1686	-0.8753	-1.6354	-0.0665	-0.3693	-0.9952	-0.3031	0.6942	-0.0977	0.6793	1.1588	0.7181	0.8235	-1.1986	0.2759	-0.0991	1.1817	1.4757	0.6517	1.8337	-0.7482	-2.1683	0.7199	-0.5995	0.4045	-0.6341	0.437	0.3773	-0.8897
O15382	BCAT2	Neurology_II	1.1824	0.6185	-0.0617	-0.3223	-0.2969	1.9562	1.4188	-0.7587	-0.3364	-0.2451	0.1485	-0.6558	-1.7215	-0.4607	0.0627	-0.5052	-0.363	-0.0179	0.4358	-1.236	0.0804	-1.6985	-1.0446	-1.1138	0.4441	-0.9341	-0.2303	0.537	0.0731	0.3693	-0.7097	1.839	-1.0537	-0.9639	0.1563	0.8471	-0.1819	-0.763	0.6467	2.5601	-0.6272	-0.5535	0.0946	0.3969	1.0053	2.7875	-0.9913
O15389	SIGLEC5	Neurology	-0.5643	0.0025	-0.0845	-0.0025	-1.5167	-0.7572	-7.1118	-6.5761	-0.0507	-1.5135	0.8149	1.0754	0.9716	0.6398	0.5255	0.1024	-2.3085	-0.1139	2.0484	-0.0099	-0.6592	-0.1037	1.2615	-7.316	1.767	1.9566	1.1516	0.7547	1.4059	1.86	-0.6171	0.3646	-0.1901	0.946	0.3121	1.8033	0.6179	-2.6693	0.2767	-0.6754	-2.3085	0.68	-0.7938	1.2125	0.9543	0.6792	-0.4497
O15394	NCAM2	Neurology	0.3544	0.6171	0.3565	-0.0999	0.701	-0.1946	0.0329	-0.1292	0.4166	0.2331	-0.2743	-0.1233	-0.1822	0.0439	-0.3676	0.0829	-0.0457	-0.0952	0.5193	-0.1388	0.2816	-0.1055	-0.11	-0.1699	0.4917	0.21	0.0742	-0.0691	0.9963	-0.117	-0.0269	-0.1757	0.4913	-0.2576	-0.861	-0.0484	-0.2348	-0.5613	0.1359	0.0421	0.2704	-0.4676	-0.058	-0.2343	-0.0308	0.403	-0.2151
O15400	STX7	Inflammation_II	1.1148	-0.2965	0.659	0.8549	-0.5766	1.0959	-1.0411	-0.1757	0.6396	-0.3486	-0.7366	-0.3011	-0.5204	0.0159	-0.0969	0.2089	-1.2629	-0.6231	2.8654	-0.3058	-1.078	0.5349	-0.6182	-0.8282	-0.0065	0.3759	-0.0834	-0.3231	0.9243	1.9471	0.2098	-0.5235	-0.5566	0.7391	0.0278	1.491	0.7787	0.4941	-0.7365	-0.2682	0.189	-0.219	0.7386	-0.7749	0.33	-1.0318	-0.9041
O15444	CCL25	Inflammation	-1.4076	0.2694	0.0829	0.0949	0.8247	0.3438	0.5349	-0.3025	-0.2011	0.161	-0.1075	1.7172	0.2994	-0.2473	-0.0503	1.3106	-0.3106	-1.7401	-0.2798	-1.2552	-0.9631	0.4614	-0.1815	-0.0104	0.8419	0.6548	-0.3	-0.4824	0.2916	1.1089	-1.0101	0.6552	0.0493	0.4835	0.7763	-0.5565	1.1925	-0.6848	-0.2257	-0.6195	-0.1543	-0.4008	0.3883	0.0104	-0.3111	1.5584	0.2838
O15455	TLR3	Inflammation	-0.0906	0.2426	0.3419	1.0588	0.3363	-1.5266	0.0042	-0.3063	-0.102	0.1402	-1.8559	0.1038	-1.5435	-0.5178	-1.4113	0.8536	-0.2191	-0.7816	-0.4553	-0.9931	0.4201	-0.5701	-0.1874	-0.67	-1.1604	0.1909	0.3552	-0.3901	0.6086	0.7598	-0.2941	0.0238	0.1887	-0.3403	-0.4029	-0.1326	0.5992	-0.1247	-1.4534	-1.5922	-1.8653	-0.7313	0.6216	-1.4151	0.4408	-0.8954	0.6206
O15467	CCL16	Cardiometabolic	-1.3283	1.1335	0.397	0.1541	0.0982	-0.331	-0.0595	-0.3363	-0.0999	0.2777	0.3482	0.087	0.0428	-1.0619	-0.1608	-0.1247	-0.2086	-0.1008	-0.7394	0.0709	0.0191	-0.603	0.2722	-0.1299	-0.2806	1.1715	-0.1828	0.8195	1.6067	1.838	-1.1843	0.2809	-0.6201	-0.1444	1.4063	1.1196	0.4794	0.0937	-0.4518	-0.1075	-0.0385	0.0694	0.3703	0.3742	1.1381	-0.0191	0.5177
O15496	PLA2G10	Neurology	-0.4658	-0.091	0.5999	-0.4279	0.2799	0.7424	-0.041	0.261	-0.2377	0.2852	0.8357	0.1212	1.5237	0.0364	-0.8834	0.2163	-0.1168	-0.6649	0.2284	-2.0446	-0.8481	-0.3826	1.2579	0.3282	1.2504	-0.5806	-1.1639	0.409	0.5515	1.1589	0.8747	1.2896	-0.6613	1.0178	0.5935	0.6234	-0.0644	-0.6066	0.4368	0.5536	1.0426	-0.7424	-0.0424	-0.0628	-0.636	-0.2692	0.3705
O43155	FLRT2	Neurology	-0.2338	0.2393	0.3385	0.3379	0.6016	0.0305	0.3758	-0.2949	0.3312	0.3045	-0.1892	-0.4971	-0.4339	-0.4159	0.161	0.09	0.15	-0.0758	-0.1931	0.5423	-0.3735	-0.5107	-0.3047	-0.1918	0.0295	0.7832	-0.0077	-0.1802	0.0068	0.7448	0.1277	-0.1331	-0.0209	0.1625	-0.2739	0.4735	0.2274	-0.4489	0.1554	0.152	-0.4527	0.2244	-0.4944	-0.0972	0.0998	0.162	0.3513
O43184	ADAM12	Inflammation_II	-0.7791	-0.1296	0.4305	-0.284	-0.2859	-0.8035	-0.9849	0.3237	0.3252	0.4737	-0.3862	0.3811	0.6877	-0.1553	-0.0403	0.6177	-0.9943	-0.8457	0.9906	-0.1161	-0.4199	3.1024	1.5251	-0.19	-0.0534	2.0308	0.9392	1.8642	1.0813	2.6869	0.3218	-0.3906	-1.1568	0.4133	0.2884	2.9082	0.3663	0.4675	-0.2774	-1.1321	-0.3494	-0.0153	-0.1066	-0.1654	2.1712	0.0153	0.3523
O43186	CRX	Cardiometabolic	4.8019	-0.5338	1.2745	0.1907	-1.1723	-1.6671	-0.8975	-0.8547	0.3728	-0.4037	-0.5109	-1.1447	0.9314	-0.3039	0.1689	0.592	-0.986	-0.4934	-0.5128	1.4794	0.6811	0.0042	-0.1578	0.4986	1.1415	-0.934	-0.4919	-1.2168	0.651	-0.5364	-0.7545	0.7138	0.3876	1.7615	-0.2544	0.9074	0.2612	3.2617	-0.0446	-0.029	-0.2066	4.5014	0.3218	6.282	-0.4868	-0.5465	0.0072
O43240	KLK10	Oncology	-0.118	0.6209	0.3939	-0.1432	0.4527	-0.3386	0.0586	-0.4056	-0.3044	0.1485	-0.6002	0.4229	0.2218	-0.1435	-0.3839	-0.2625	-0.1587	-1.1555	-0.9997	-0.6613	-0.0778	-0.0191	-0.9211	-0.1974	0.3126	0.2642	0.7729	0.3768	0.73	0.7734	-0.1532	0.7345	0.0191	-1.2762	0.6786	-0.2291	-0.073	-0.372	0.3941	-0.499	0.3597	-0.5916	-0.3124	-0.6269	0.3324	0.3158	0.1356
O43247	TEX33	Oncology_II	-0.283	1.2525	0.41	0.2551	-0.9022	-0.5763	0.2206	0.4635	0.0806	1.8985	0.1586	-0.2556	-0.4813	-1.3633	0.3376	-0.0824	0.3953	0.0139	-0.1434	-0.6559	0.3053	-0.611	-0.227	0.0072	0.2148	0.7379	-0.1643	0.7132	0.0116	0.6679	0.0341	0.7729	0.3318	0.9548	-0.4386	0.9349	0.306	-1.0382	-0.0169	-0.7669	-0.3114	-0.1192	0.8795	-1.0247	-0.0072	0.672	-0.6275
O43278	SPINT1	Neurology	-0.5703	-0.12	0.0071	-0.5729	0.2742	0.0144	-0.458	0.3984	0.2128	-0.0145	-0.3758	-0.1124	0.7207	-0.1122	-0.5804	-0.0246	-0.1157	-0.7912	1.1969	-0.063	0.7077	1.2672	-0.398	-0.2822	0.2109	-0.5383	0.3558	1.2175	0.7374	0.2548	-0.267	0.3864	0.1854	-0.2712	-0.2484	2.5851	-0.0301	-0.6738	-0.0002	-0.5586	-0.2226	-0.4898	-0.2517	0.0766	1.6376	0.2872	-0.1542
O43280	TREH	Cardiometabolic_II	-0.0518	0.3192	0.4847	1.6474	0.9765	0.312	0.4311	-1.0038	-0.4342	2.1454	-0.952	-0.8552	-2.1053	-0.108	-1.3983	0.6643	0.7295	-0.2316	-2.4202	0.8257	-0.3232	-1.3655	0.3388	-1.3549	-0.3849	-1.3786	-0.3932	-3.1445	-0.492	1.6338	-1.1431	-1.589	0.8353	-0.3815	0.4176	0.0012	0.9645	0.8123	1.5593	0.3142	-1.425	0.828	-0.0246	-0.0598	-0.9615	-0.2649	-0.3076
O43290	SART1	Cardiometabolic_II	-0.281	-0.0805	-0.381	0.324	-0.6453	-0.1028	-0.865	0.3022	0.1993	-0.4452	-0.5031	0.2319	0.0641	-0.0719	0.484	-0.229	-0.2709	-0.4411	2.2916	-0.4892	0.0648	2.1548	-0.4749	-0.0421	-0.0049	0.7544	0.4948	0.7463	0.8909	1.7114	1.1763	-0.2185	-0.2916	0.8015	-0.6097	3.6184	1.5896	-0.5479	-0.7473	-1.2959	0.5068	0.052	-0.0819	0.5984	1.6807	-0.1337	0.1091
O43291	SPINT2	Inflammation	-0.1059	-0.187	-0.4135	-0.2278	0.1426	0.1044	-0.3764	-0.0451	-1.4912	-0.4992	-0.0595	0.6739	0.2772	0.1711	-0.1603	-0.1584	-0.6264	-0.7955	1.0184	-0.6674	-1.898	1.16	-0.2258	-0.2159	0.3302	1.0966	0.3053	0.4337	0.6355	2.2489	0.1204	0.054	-0.2466	0.2023	0.617	1.5647	-0.0027	0.0439	-0.2844	-0.0564	0.3118	-0.3401	-0.3067	-0.1733	1.2243	-0.0761	-0.5548
O43312	MTSS1	Oncology_II	1.8511	1.4899	-0.6775	1.0639	-0.8767	0.2675	-0.3929	1.2947	-0.1032	-1.0893	-0.2693	1.3141	1.1866	-0.2505	-0.0239	-1.7093	0.0611	-0.3784	0.4921	0.0693	-0.3662	-0.4542	-0.311	-0.4609	-0.9221	0.1976	0.5838	0.5564	1.3623	0.178	0.5484	-0.8732	1.2094	-0.0685	3.1481	-0.1376	0.4921	4.7817	-1	-1.0821	0.6509	-1.1471	0.9886	-0.0389	2.9945	-0.266	-0.5235
O43320	FGF16	Inflammation_II	-0.4028	-0.1103	0.051	-0.2786	0.5874	-1.5026	-0.4729	0.5654	-0.7486	-0.3202	-0.1277	-0.5207	0.6002	-0.4512	-0.2645	-0.1106	-1.3069	-0.0196	-2.5843	-0.1199	1.3324	-1.1501	1.1439	-0.6156	-0.0747	0.3881	0.6161	-0.5041	-0.0397	0.1985	-0.023	-1.3737	-0.2156	0.2076	-0.7756	-0.5524	0.8608	0.0576	-0.7254	-0.4976	-0.1154	-0.3277	0.2605	0.5655	1.0779	-1.0537	0.3278
O43396	TXNL1	Neurology_II	-0.9054	0.0211	-0.3961	-0.6821	-0.8292	1.4073	0.5173	2.9326	-0.8553	-0.9837	0.7155	0.5815	-0.718	-0.934	-0.7633	0.0691	2.4164	2.4465	-1.206	0.372	-0.2729	-0.9563	1.3553	-1.3525	1.1973	1.065	0.5045	0.2044	0.827	-0.3879	-0.1039	1.0347	-1.1154	-0.5868	0.5461	0.3609	-0.671	0.4525	-0.6178	-1.6958	-0.6753	-0.0262	0.1553	0.0021	-0.5568	-0.1455	-0.366
O43399	TPD52L2	Inflammation_II	2.9323	0.8049	-1.3413	1.4078	2.8027	1.857	-1.0573	2.1715	-0.1367	-1.1081	-1.0991	0.359	-0.0697	-1.1929	0.0981	-1.6535	-2.3262	-1.161	0.8726	-1.2375	-2.3473	0.5617	-0.0567	-0.3251	0.583	-0.0405	-0.3381	-0.2934	0.9735	0.0097	-0.1929	-1.6353	0.4856	-0.5565	3.2322	0.1726	0.1286	4.3442	-1.0122	1.3423	0.1646	-0.6032	0.2428	-1.4967	1.6834	-0.8665	-1.1026
O43405	COCH	Cardiometabolic_II	-0.085	-0.3145	-0.1287	0.1135	-0.1149	-0.4627	-0.176	-0.2416	-0.0455	-0.6901	-0.4693	0.085	0.0322	-0.1308	0.1502	-0.0286	-0.0156	-0.6857	0.5338	0.2531	-0.3676	-0.327	-0.3354	-0.9215	-0.0946	1.3967	-0.0188	0.2089	0.8707	1.5784	0.2484	-0.1348	-0.0199	0.0271	0.2651	1.7541	0.369	0.6385	-0.2453	-0.1817	0.3733	-0.106	0.1449	-0.5019	0.0969	-0.5225	-0.3712
O43422	THAP12	Oncology_II	-0.8511	1.0336	-0.7173	-0.1735	0.1205	2.3667	-0.8997	-0.0049	-1.0384	-0.3478	0.1388	-0.7822	-0.4689	-0.2329	0.2666	0.5774	0.9342	0.0049	-0.3147	-0.0376	-0.3829	-0.7657	-0.1366	1.1253	0.0567	-0.6085	-1.9688	0.5715	0.2293	0.2798	0.5468	-0.0808	-1.1983	0.6079	0.8422	1.7845	0.1623	0.4994	-1.6652	4.894	0.4174	1.472	-0.2401	0.2577	0.0982	-0.0615	0.59
O43423	ANP32C	Cardiometabolic_II	-0.2321	0.3568	-0.1714	-0.2499	-0.3315	0.2021	-0.1217	-0.2463	0.1443	-0.3506	0.0526	-0.1342	0.027	-0.1127	0.0045	0.0993	0.344	-0.1689	0.0909	-0.3841	0.0622	0.1369	0.1631	-0.1493	-0.0563	-0.1663	-0.2733	3.5078	-0.1761	-0.0304	0.2881	-0.1614	-0.038	-0.2755	0.1417	0.2738	0.5373	-0.2807	0.1346	0.9386	-0.0585	0.0496	-0.2022	-0.0904	-0.1621	0.2105	0.5642
O43432	EIF4G3	Neurology_II	0.022	-0.081	-0.6352	0.0715	0.016	-0.4382	-0.5905	1.4951	0.2386	-0.1991	-0.3845	0.6757	0.8159	-0.5033	0.7619	-0.1359	0.1987	-0.016	0.3509	-0.5089	-0.6577	0.4809	-0.494	-0.0451	0.0443	0.6098	0.0632	0.6969	1.4714	-0.4738	0.9365	0.2499	-0.6996	0.0919	1.5514	0.0711	0.1551	2.6806	0.2436	-1.1509	0.3924	-1.7951	-0.55	-1.3722	1.6473	-0.7959	-0.7517
O43464	HTRA2	Oncology	0.3644	1.2687	-0.3059	-0.0642	0.3498	-0.1839	-0.3061	0.1574	-0.4564	0.5295	-0.3383	0.1776	-0.0753	-0.5348	-0.3737	-0.7111	-0.1389	-0.6054	0.7992	-0.1258	1.6804	-0.4487	-0.0489	-0.4518	-0.2668	-0.8892	0.2494	-0.8462	0.9209	0.006	-0.1044	0.565	-0.3334	-0.006	0.7389	3.4918	0.2114	1.8508	-0.7741	0.2695	-0.3687	-0.3041	0.2527	0.1043	0.4868	-0.248	-0.3496
O43474	KLF4	Neurology_II	-0.3165	-0.4654	0.4541	-0.0277	-0.2254	-0.5713	-0.866	-0.7123	0.4007	-0.5523	0.2955	0.6695	0.1699	-0.2806	0.0096	-0.366	0.265	-0.9596	1.4946	0.2043	-0.0375	0.6551	-1.3777	-0.5996	0.6038	-0.4076	1.0354	0.8754	1.4454	1.2208	-0.9288	0.1906	-0.0984	-0.759	0.6261	2.18	1.219	-0.4581	-0.4153	-0.1802	-0.0204	0.1934	-0.0911	1.2054	0.6628	0.3429	-0.0096
O43493	TGOLN2	Inflammation_II	-0.7658	-0.073	-0.1025	0.2494	0.347	-0.213	-0.2095	0.1823	-0.583	-0.2661	-0.1335	0.1875	0.095	-0.1507	0.0513	0.0557	-0.0584	-0.8833	0.4843	-0.5832	-0.8111	0.7131	0.2465	-0.9072	0.4533	1.1777	0.0633	0.364	0.6003	1.5164	0.4931	0.3309	-0.4944	-0.0332	-0.5392	0.0627	-0.0015	-0.445	0.0549	-0.4825	-0.08	0.0457	-0.2275	-0.4799	0.9486	0.4074	-0.1662
O43504	LAMTOR5	Oncology_II	-0.4091	0.1444	-0.0476	-0.3742	2.0135	-0.4564	-0.8975	-0.6519	-0.7464	-0.3728	-0.2605	0.1034	-0.1151	-0.4397	-0.8515	-0.0853	0.6162	-0.835	0.8769	0.057	-0.3581	0.3292	-0.4659	-1.1246	-0.192	0.8311	0.2036	0.0025	0.4588	1.4034	-0.1245	0.9748	0.4086	0.1271	-0.6753	3.8798	0.3814	0.5198	-0.4296	-1.2933	-0.3361	-0.526	-0.2825	-0.2808	1.3227	-0.1396	-0.0025
O43505	B4GAT1	Neurology	-0.3403	0.3712	0.1548	-0.0538	0.2267	-0.0974	0.4112	-0.1511	0.3797	-0.0048	0.3729	0.3999	-0.565	-0.3794	0.0682	-0.0606	-0.4144	-0.4069	0.0939	0.3779	-0.1691	-0.6924	-0.263	-0.4009	0.8295	-0.0363	0.0181	0.2976	0.5786	0.329	-0.7125	0.2136	-0.0787	-0.5433	0.3953	0.5513	0.2102	-0.0925	0.639	-0.3318	-0.0197	-0.2101	-0.1996	0.1023	0.9081	0.3811	-0.0206
O43508	TNFSF12	Inflammation	-0.0843	0.0357	0.3766	0.3014	0.7413	0.1135	0.3263	-0.2282	-0.0981	-0.1758	-0.0728	0.4843	-0.3344	-0.1488	-0.2975	-0.4424	0.2422	-0.5403	0.3078	-0.3992	-0.159	-0.4811	-0.167	-0.3392	0.7362	-0.2778	-0.0678	-0.2954	0.8605	0.0579	0.0483	0.1061	0.1301	-0.1305	0.2418	-0.7057	0.0662	0.229	0.3821	-0.1205	0.1878	-0.1216	-0.0616	0.1868	-0.0986	0.0204	-0.0273
O43524	FOXO3	Oncology	0.6073	-0.0848	-0.3187	-1.1446	-1.3628	1.448	-1.7567	-1.2469	-0.9346	-0.5592	-0.9521	-1.6385	-2.1999	0.7918	0.5126	0.0352	-0.552	-0.9442	3.9836	-0.1771	-1.7336	0.4878	-0.6483	0.8847	-0.0221	-1.0739	-2.0481	0.5383	0.2667	1.1323	0.8038	-0.2326	1.1784	-1.1454	0.8739	0.0221	1.2086	1.3976	-1.2557	-0.2315	0.361	0.4312	-0.7899	-0.959	-0.8995	0.6865	-0.3209
O43557	TNFSF14	Neurology	-0.3268	-0.4482	-0.5191	0.0074	-0.1967	-0.3132	-1.3355	1.8117	-0.2647	-0.2673	0.2004	-0.213	0.2419	-0.1117	0.3535	-0.913	-1.3437	-0.3377	0.2393	0.6244	-1.1538	0.6809	-0.0757	0.1532	-0.3542	-0.6583	0.6905	0.9377	-0.0076	-0.0357	0.5944	-0.0352	-0.8723	-0.2336	0.5869	0.3484	0.0076	0.7131	-1.1551	-1.2248	0.7254	-0.343	-0.0335	0.8657	0.7183	-0.7767	0.7374
O43561	LAT	Inflammation	2.6083	0.7902	-1.8428	0.6597	0.4133	0.9296	-0.3724	0.4997	0.0489	-1.5967	-1.0317	1.1174	-0.1798	-1.1575	0.123	-1.6659	-1.5408	-0.7177	0.7017	-1.8036	-1.086	0.1354	-1.2269	-0.0946	-0.8308	-0.1354	-0.3402	-0.0489	0.5309	0.5339	0.1519	0.0574	-0.4846	0.1455	2.9565	-0.5764	-0.0496	3.5165	-1.3832	1.1281	1.1901	-0.5491	-0.5178	-0.8424	1.5164	-1.1822	-0.9248
O43570	CA12	Oncology	-0.5736	0.1202	0.6728	0.0057	0.4977	-0.1477	-1.249	1.7174	-0.2665	-0.3538	-0.4287	0.3539	0.5601	0.7179	-0.222	0.1291	-0.1443	-0.8794	2.2508	-0.7538	-0.787	1.9755	0.3278	-0.1741	0.4866	0.3935	0.3289	1.3913	0.9997	1.1554	-0.2335	1.2688	0.3569	-0.3212	-0.5993	0.2049	-0.4142	-0.4785	-0.0259	-0.0013	-0.4695	-0.0333	-0.4137	0.1208	1.9136	-0.0634	-0.208
O43583	DENR	Inflammation_II	1.0762	-0.4094	-0.3484	0.621	-0.3162	1.1621	-1.391	0.1762	-0.3357	-0.0879	-1.0918	-0.6588	-0.387	-0.3862	-0.1661	-0.2306	0.035	0.356	2.1838	-0.2801	-0.8422	-0.5658	-0.7279	-0.4146	-0.2817	0.5082	-0.6965	-0.035	0.1966	1.0221	0.0406	0.475	0.2776	0.8573	-0.2242	1.5259	1.2425	1.3226	-0.7442	-1.1414	0.6908	-0.9014	0.5067	-0.8069	-0.3005	-0.4023	-0.6838
O43597	SPRY2	Inflammation	1.8361	-0.1191	0.0944	1.3694	0.3174	0.5973	-0.5675	0.4823	-1.452	-0.0702	-0.9899	0.4046	0.0971	-1.1937	-0.2479	-0.3929	-0.8672	-0.2654	-0.0585	-0.7708	-1.186	-0.2468	-0.9075	-0.261	-0.3131	0.503	-0.1121	-0.5819	0.3547	1.3925	0.051	-0.0093	-0.2394	-0.5464	1.5491	0.9807	-0.2534	3.6841	-0.3087	0.2319	0.312	-1.0291	0.0433	-1.1405	1.258	-0.1278	-0.9553
O43598	DNPH1	Inflammation	0.2581	0.4559	0.0033	0.0473	-0.927	1.0112	-1.3891	-0.0944	0.8092	-0.0903	-0.0645	-0.0408	-0.7395	-0.4749	0.8558	0.4541	0.1582	0.331	2.1601	0.0333	-0.1978	-0.655	-0.0509	0.2025	-0.207	0.0174	-0.9321	0.0651	1.11	1.5609	0.8694	0.6771	-0.5128	-0.2461	-0.2493	1.6323	1.1437	0.3202	-0.5776	-1.3865	1.5783	-1.276	0.776	-0.0222	-0.0871	0.4932	-0.5544
O43639	NCK2	Inflammation	2.655	0.7648	-0.6251	1.4636	0.8904	1.4686	-0.4483	0.7033	-0.0723	-0.569	-0.4667	0.1285	0.2349	-0.3004	0.0153	-0.4974	-0.6016	-0.3222	0.2092	-0.3623	-0.4699	-0.442	-0.2819	-0.0067	0.0168	-0.0839	-0.0591	-0.0199	0.8057	0.1086	0.1658	-0.4411	0.6007	0.0561	2.4525	0.0605	-0.1864	3.4963	-0.3755	0.8577	0.2377	-0.5991	2.5801	-0.3728	0.644	-0.1525	-0.499
O43653	PSCA	Oncology_II	-1.092	0.3332	-3.1795	-0.1533	-5.5413	2.8512	-4.0144	0.8463	-0.3868	-4.8487	-5.5957	1.6079	0.1541	2.5233	0.1431	-4.1218	1.0998	-1.3662	-4.6259	-0.408	-0.2055	1.6347	1.3198	-5.827	-5.6541	1.2304	0.5259	0.0286	0.4494	3.2563	-5.8459	1.3787	0.9777	-5.8432	-0.5739	-4.3348	-5.7155	0.2203	-0.1391	-1.0498	1.3503	0.3287	-1.8598	-2.1761	0.8829	1.0928	0.1571
O43663	PRC1	Oncology_II	-0.7107	0.8879	0.0971	2.4198	-0.6349	-0.2782	0.0744	0.4853	-0.0263	0.0042	-0.5455	-0.4539	-0.09	0.0877	0.9807	0.0227	-0.1006	-0.2939	-0.5464	-0.1065	-0.496	0.4314	-0.2393	-0.106	0.2193	0.2242	0.1821	0.836	-0.0389	0.0155	0.2485	-0.5534	-0.0042	-0.0233	-0.3261	3.4632	-0.5523	-1.5224	-0.4115	-0.6753	-0.3671	-0.1686	-0.7642	0.4876	0.362	0.4093	0.1006
O43665	RGS10	Neurology_II	2.0086	-0.071	0.5127	0.6003	0.2135	0.6638	-1.2041	-0.4719	2.1439	-0.4461	-0.7929	-0.0962	1.3874	1.0612	0.2521	0.0246	-0.5828	-0.047	0.7964	0.424	-1.1124	-0.3169	-0.5313	-0.6013	-0.3361	-0.201	-0.2049	0.1568	0.4291	0.2276	0.1325	0.0618	0.0649	-0.1057	1.1362	0.1821	0.3731	2.8316	-0.022	0.2715	0.4469	-1.0714	0.2847	-0.3911	-0.0212	-0.1125	-0.3474
O43681	GET3	Cardiometabolic_II	0.1129	-0.0113	-0.4466	-0.2489	-0.6239	0.3294	-0.3262	0.2073	0.2076	-0.8663	-0.7299	-1.0778	-0.1753	-0.6678	0.4563	-0.6346	3.054	-0.4359	2.1156	-0.5932	0.1629	0.3203	-0.0318	-0.4384	-0.799	0.2672	-0.7827	0.3311	-0.1147	0.5339	-0.1469	-0.047	0.3457	-0.6671	0.8673	0.4933	0.4133	1.3306	-1.1367	0.2222	0.1934	-0.6185	1.3081	-0.6192	-0.3404	1.1922	-0.714
O43699	SIGLEC6	Oncology	0.4669	0.3048	0.422	0.1983	0.2035	-0.118	0.294	-0.2137	-0.1191	0.344	-0.3026	0.2382	0.0896	0.2929	0.3118	-0.3805	-0.0029	0.0345	-1.3143	-0.236	-0.3218	-1.3928	-0.2451	-0.4275	-0.3439	-0.3056	1.1362	-0.5438	0.4143	0.1585	0.0722	0.152	-0.5776	2.4886	0.5772	0.1983	-0.0226	-0.4243	-0.4471	-0.2901	-0.3885	-0.5543	0.458	-0.2671	0.3791	-0.6224	-0.357
O43707	ACTN4	Inflammation	-0.2476	-0.0886	0.2444	0.5511	-0.1448	-0.107	-0.4217	-0.173	-0.1775	-0.3623	0.0179	0.2304	-0.106	0.0329	0.621	0.2982	0.2018	-0.0474	0.3609	0.0023	-0.2562	0.4921	0.1436	-0.1554	0.1355	0.743	0.2865	-0.2341	0.041	0.592	-0.0069	-0.1993	-0.3747	-0.0468	0.0241	0.0584	0.2895	-0.0588	0.0046	-0.445	-0.1532	-0.5339	-0.0912	-0.3208	0.3225	0.0653	-0.213
O43715	TRIAP1	Oncology	0.096	0.2413	-0.0647	-0.0444	-0.1048	0.0302	-0.1034	-0.1533	-0.3565	-0.1775	-0.2309	-0.002	0.002	-0.1466	-0.2664	-0.0801	-0.1007	-0.4875	0.9733	-0.1255	-0.1807	1.1976	-0.5505	-0.2579	0.4334	1.0568	0.3132	0.2083	0.4532	1.8727	0.2688	0.2344	-0.3261	-0.0682	0.0779	0.7889	0.276	0.7341	-0.4154	-0.1929	-0.2396	-0.4855	-0.2919	-0.2643	0.4182	0.009	-0.4164
O43734	TRAF3IP2	Cardiometabolic_II	0.0977	0.6596	0.0581	1.3777	-0.2557	-0.3371	-0.171	0.5829	-0.1042	-0.1973	0.0833	-0.1251	0.1725	0.3027	0.5445	-0.0704	-0.3006	0.1419	0.2817	0.3786	-0.4689	0.1899	0.6831	-0.4973	-0.5768	0.3529	0.0661	0.2105	-0.5194	0.3982	1.6953	2.2017	1.9657	-0.8171	-0.4326	0.3484	-0.0786	0.2144	-0.0234	0.2436	-0.278	0.181	0.6301	-0.0703	-0.1977	-0.4436	-0.6566
O43736	ITM2A	Inflammation	-0.3271	0.0247	0.494	0.226	-0.1496	0.2019	0.3551	0.9147	0.3129	0.0464	-0.5661	0.4422	1.5147	-2.108	0.5337	0.442	-0.7689	0.318	1.0751	-0.0964	-2.0609	-2.1376	-0.0042	-0.2089	-0.0033	-1.7985	-1.3832	-0.8507	-1.0859	1.4203	-0.9953	-2.4072	0.1731	-1.3451	0.3516	1.3065	-1.2428	-0.4461	-0.4336	0.4517	-1.9889	0.7406	-0.1641	0.514	0.0213	-0.0502	-0.4993
O43739	CYTH3	Oncology_II	-0.0194	-0.2212	-0.0786	-0.9804	0.1727	0.2989	-0.3888	0.8841	0.2462	-0.7641	0.1864	-0.1609	-0.6844	-1.1749	-0.7694	-0.3678	-0.4923	0.0552	0.116	-0.5355	0.5593	-1.2921	0.7198	-0.2598	0.5548	0.6652	-0.2455	-0.2221	0.3998	0.8877	0.2283	2.5168	-0.3375	-0.8022	-0.2495	-0.3556	0.0938	2.0842	-0.9753	-0.9344	-0.0192	-0.105	0.6833	0.099	0.6415	0.1274	-0.0847
O43752	STX6	Oncology	-0.4164	-0.0662	-0.2507	0.0121	-2.1178	-0.012	-1.1344	0.3153	-1.0248	-0.1797	-0.2302	-0.6129	0.1	0.4218	-0.2666	-0.4569	-0.3697	-0.437	2.3277	-0.6687	-2.0089	3.8471	-0.5267	0.16	-0.1761	0.638	-0.1143	3.6666	0.9157	1.7859	0.3803	-0.8934	-0.7162	-0.4057	0.0369	1.5157	0.4482	1.7439	-0.3816	-1.0557	-0.5117	0.7323	-0.4426	-0.1133	0.4396	-0.0781	0.012
O43768	ENSA	Oncology_II	0.5314	1.3653	-1.0851	0.7324	0.3343	1.1191	-0.5246	0.1151	-1.2785	1.3968	-0.4928	0.2022	0.002	-1.015	0.1964	-0.1417	-0.6006	-0.2181	1.0106	-0.1425	-0.3229	-0.508	0.2367	-0.4918	-0.3936	0.2665	0.3157	2.061	0.238	0.4984	-0.1229	2.244	-0.0654	-0.002	1.3752	-0.5478	-0.1277	1.754	-0.173	0.7061	0.4328	-0.3866	0.2833	-0.2274	-0.6728	-0.6932	-0.3729
O43776	NARS1	Neurology_II	1.2358	-0.1113	-0.4589	0.3984	0.4572	0.8861	-0.693	0.1052	-0.052	-0.3989	-0.714	0.025	-0.076	-0.7448	0.1354	-0.0462	-0.9628	-0.6261	0.8867	-0.5152	0.3211	-0.1701	-0.4178	-0.0387	-0.2525	-0.3451	-0.025	-0.2414	0.1174	-0.0801	0.3019	0.3553	-0.2537	0.3638	0.5927	1.5883	0.2734	1.6463	-1.023	-0.0523	0.2688	-0.3532	0.1259	-0.5082	0.4726	-0.426	-0.5238
O43805	SSNA1	Oncology_II	2.0226	-0.1387	-0.1101	0.4175	0.2271	0.8035	-1.7054	-0.3334	1.0183	-0.7247	-0.3247	-0.0508	-0.5209	-0.5988	0.0796	-0.7322	-0.4162	-0.3113	2.2135	-0.569	-0.5191	0.2154	0.0195	-0.4068	-0.1217	0.6902	-0.0787	-0.2966	0.7597	1.596	1.4835	-0.2162	-0.1754	0.2573	-0.1182	0.9029	0.8346	1.2864	-0.2571	-0.1518	0.6654	-0.3381	0.412	-0.42	0.3727	0.3295	-0.4444
O43854	EDIL3	Cardiometabolic	-0.4677	0.389	0.2792	-0.1533	0.0445	-0.604	0.3985	-0.5698	0.3056	-0.0976	-0.1146	0.8325	-0.5336	-0.0431	-0.6362	0.2466	0.029	-0.4772	-0.8658	-0.4203	-0.3116	-0.5387	0.0296	-0.6776	0.4595	-0.2839	0.4017	0.2721	0.2669	0.0726	-0.3925	-0.1093	-0.3683	-0.1606	-0.0826	-0.0926	-0.243	-0.2546	0.7911	-0.3773	0.4066	-0.517	-0.5308	-0.5731	0.4103	0.2577	0.2169
O43866	CD5L	Inflammation_II	-0.2829	0.2686	0.5757	0.5743	-0.0012	-0.0968	-0.8554	2.219	-0.401	0.1229	0.0792	-0.4264	0.5175	2.1282	-0.1019	-0.6763	-0.4665	-0.2759	0.7371	-0.8993	-0.3426	1.007	2.938	-0.7664	0.0764	0.5662	-0.6003	-0.3836	0.2835	-0.3226	-0.2808	-0.1655	0.5896	0.1281	-0.2498	0.2114	0.424	0.0447	-0.1046	-1.0113	-0.7814	0.1652	0.3572	0.3476	0.7797	0.879	0.0733
O43889	CREB3	Oncology_II	1.3621	0.1077	0.5385	0.129	0.6374	-0.32	-0.3765	0.3635	1.1587	1.4502	-0.3066	0.9362	0.347	-0.8149	0.3714	0.1724	-0.2102	-0.7014	0.1403	-1.5301	1.2021	-0.0803	0.3427	-0.0246	-0.2651	1.836	-0.2305	-0.3573	0.4252	-0.0625	-0.1389	3.0464	-0.2445	-0.2324	1.6841	0.2345	-0.7538	0.733	-0.2865	0.2529	-0.4342	0.1925	0.6951	-0.7329	0.1937	-0.2083	1.3316
O43895	XPNPEP2	Oncology	-1.7125	0.5363	1.0767	0.8727	1.7223	-1.0413	1.962	-0.4179	-1.2114	-0.0924	-1.7025	0.0573	0.0984	-1.0499	0.6355	-0.1445	-0.9403	-2.0694	-2.1452	1.7719	2.3848	-1.0903	0.6825	2.167	1.7745	-3.1555	-1.1394	0.4291	-0.4853	-0.5182	1.2409	-0.2186	1.0442	-0.5729	-1.9939	-0.5153	0.1866	2.1746	0.2982	-0.298	0.1152	1.8616	0.3989	-2.0223	0.5295	-1.8368	-1.0481
O43896	KIF1C	Cardiometabolic_II	-0.0062	-0.1339	1.8257	0.2444	-0.1878	0.0308	-0.2826	0.2594	-0.6755	-0.1802	-0.3988	0.0811	-0.4414	0.1489	0.1553	-0.2449	-0.323	-0.2507	1.0756	-0.0158	0.0946	0.7733	-0.2208	-0.1508	0.8243	1.1882	0.5616	0.3925	1.0066	2.2554	-0.1962	0.1092	-0.725	0.1966	-0.0462	0.4974	-0.2269	-0.0244	-0.1662	-0.5154	-0.079	-0.4897	0.1268	-0.8844	1.1439	0.2699	-0.8863
O43903	GAS2	Oncology_II	-0.4464	0.4055	0.4626	0.786	1.0482	0.3163	0.0383	-0.1654	-0.5605	-0.0351	-0.1842	-0.5569	-0.3952	-0.0527	0.2456	-0.0024	-0.6881	0.3412	-0.1643	0.0016	-0.8135	-0.4308	-0.6944	0.5442	0.2671	0.6196	-0.5832	3.1448	0.2482	0.4554	-0.0427	1.2038	0.5518	-0.2485	-0.9168	0.9098	0.5675	-0.4703	0.4304	-0.5917	-0.2187	-0.21	0.8827	-0.1999	-0.2561	-0.6427	-0.6599
O43915	VEGFD	Inflammation	-0.2184	-0.3374	1.3801	0.453	0.7287	0.1801	0.1022	0.2765	0.4351	0.4028	-0.3438	0.0236	0.5042	0.1064	-0.9307	-0.1923	-0.2379	-0.9696	0.2004	-0.3901	0.4197	-0.0486	-0.5023	-0.5542	0.1007	-0.1898	-0.1298	0.2778	0.7468	0.9202	-0.1374	0.0125	-0.634	0.0468	-0.3324	-0.2883	-0.1308	0.006	0.0598	0.111	0.1261	-0.6984	-0.4962	-0.1151	0.4075	0.6514	-0.0769
O43927	CXCL13	Neurology	-1.3411	0.1357	0.6034	-1.5171	0.7507	-0.7462	-0.7883	1.6607	1.1044	0.228	0.0492	0.3748	0.9253	1.0038	-0.0027	-0.5067	-0.1844	-1.4406	1.1125	0.1206	1.0709	2.3634	2.1882	-0.6205	-0.0899	1.2188	0.1109	1.1075	1.5184	-0.8708	0.132	-0.6938	-0.4932	-0.204	0.2571	1.035	0.3619	-0.5082	-0.3519	-0.8788	0.5307	-0.007	0.6933	-0.1053	2.2936	0.0033	0.7314
O60218	AKR1B10	Neurology_II	-1.2468	0.8631	-2.199	-0.4833	-0.0663	1.5513	-0.124	-0.6	0.7003	1.5797	0.9307	0.7701	0.3963	0.3625	-0.23	1.2709	-1.9654	0.2397	2.6945	-0.0047	-0.994	-0.1225	-0.9089	-1.9221	1.7439	-0.6138	1.9753	-0.467	0.0821	0.124	-1.4904	2.7286	0.1214	-0.4131	0.4948	4.5332	1.341	-1.1023	0.5425	-3.8369	-0.1213	-0.4706	0.6446	1.555	-0.0575	-0.6194	0.789
O60220	TIMM8A	Neurology_II	1.7956	0.3731	0.0514	0.6804	-0.04	-0.1593	-0.1262	-0.2301	-0.1587	-0.0478	-0.4546	0.2714	0.2133	-0.2848	-0.4129	-0.5029	-0.6015	-0.1476	1.201	-0.0883	-0.1085	0.4394	-0.3818	0.0041	-0.0206	-0.1688	0.3713	-0.1956	0.348	0.5022	0.0204	0.176	0.4682	-0.1797	0.6286	2.9405	0.1386	2.8184	1.0912	-0.0834	-0.3815	-0.1951	0.0003	0.5809	0.8608	-0.4032	-0.0003
O60232	ZNRD2	Oncology_II	1.711	-0.9425	-1.586	-0.8218	-0.9776	0.6564	-0.402	0.2404	0.623	0.7276	-0.7522	0.3574	-0.085	1.2978	-0.8453	0.0037	-1.0592	0.5881	3.7553	-0.1682	1.3316	0.8306	1.4197	0.6694	0.0843	-1.0112	3.1976	1.199	1.9594	1.4068	0.5127	0.1708	-0.1177	0.2725	0.2901	8.2161	0.6164	0.0206	-0.6134	-1.0297	-0.1821	-0.0694	-0.7495	1.4064	1.8853	-0.6766	-0.5356
O60234	GMFG	Cardiometabolic_II	2.3121	0.3323	-0.5296	1.5254	0.5783	1.3611	-0.8658	0.2257	-0.3971	-1.119	-0.4834	0.177	-0.0014	-0.181	0.1701	-0.5028	-0.4261	-0.8838	1.6254	0.2776	-1.4199	-0.7093	-0.4753	-0.2378	-0.3605	-0.1993	-0.536	-0.1358	0.4864	1.1389	1.3322	-0.9552	-0.1129	-1.3306	1.2298	0.3282	0.6571	3.1877	-0.6956	0.1845	0.4635	-1.5331	0.1856	-0.7849	0.6074	0.0235	-0.4794
O60235	TMPRSS11D	Neurology_II	-0.5694	-0.4318	0.0409	-0.2891	0.406	-0.5215	0.1615	-0.1733	0.2516	-0.2136	0.5688	-0.3039	0.8495	2.7166	0.2791	0.206	-0.1395	-1.0905	1.4523	0.0061	-0.7069	3.5709	-0.1824	-1.319	0.6647	1.8462	0.4786	0.8215	2.7194	2.5058	0.5636	1.1756	-0.2863	-1.0144	-0.3573	-0.6481	-0.2999	-0.0711	0.128	-0.1799	0.1179	-0.0506	-0.8919	1.8222	0.3452	-0.3707	-0.5002
O60237	PPP1R12B	Oncology_II	0.0006	0.2517	0.3445	0.6437	0.0433	-0.1677	-1.2406	1.0995	-0.1798	-0.0814	-0.6439	-0.7548	-0.1118	-0.7577	1.0981	0.0081	0.1351	0.0917	0.0567	1.6228	-1.1878	-0.221	-0.0622	-0.4806	-0.4706	0.8584	-0.4245	-0.1337	0.2203	0.6932	-0.1326	-0.5219	1.4036	0.1073	1.0106	0.8891	1.345	1.1598	-1.2723	-0.2212	1.5806	-1.2169	-0.5706	-0.1752	0.259	4.297	5.2313
O60238	BNIP3L	Inflammation_II	-0.0403	-0.2239	-0.1174	-0.5608	-0.5721	0.1543	-0.9789	-0.8901	-0.2912	0.0868	-0.434	-0.0066	0.2079	-0.1302	-0.3916	-0.8249	-0.5449	-0.1608	1.9738	-0.3765	-0.0646	0.6733	0.4445	-0.1349	0.1352	1.059	0.3403	0.5155	1.1789	2.3527	0.0066	0.1496	-0.7013	0.3244	-0.4563	1.3418	0.3484	0.3127	-0.6759	-0.9499	0.072	0.074	-0.4267	0.2889	0.562	-0.8433	-1.0021
O60240	PLIN1	Neurology	-0.1649	0.1594	-0.1499	-0.284	0.0704	-0.205	-0.4744	0.0449	-0.0608	0.6951	-0.7075	-0.1804	1.3387	-0.7347	0.5028	-0.2325	0.2864	0.25	2.0624	0.1801	-0.1518	0.6099	-0.1599	-0.1193	-0.0218	0.1491	0.4205	0.0303	-0.0486	0.7806	0.9146	0.1229	-0.8763	-0.0103	0.4827	0.788	0.772	0.8823	-0.1009	-1.1409	-0.6226	-0.1838	-0.2103	-0.3651	-0.3427	-0.3452	0.0532
O60242	ADGRB3	Neurology	0.0329	-0.1232	-0.2796	0.5972	0.9432	-0.4485	-0.2174	-0.1304	0.1695	-0.1376	-0.4277	0.3697	-0.5284	0.0438	-0.4684	-0.0371	0.1621	-0.6142	-0.0928	-0.2966	-0.2604	-0.1493	0.3886	-0.6086	0.5965	0.3099	0.7269	0.1993	0.1235	1.7728	0.5602	0.1184	-0.1422	0.2247	-0.0379	-0.5489	-0.1867	-0.2479	-0.1892	-0.1482	-0.0426	0.3171	0.1596	-0.6785	0.4747	0.2026	-0.8167
O60243	HS6ST1	Oncology	-0.5636	-0.9182	0.6416	0.0148	0.6172	0.1982	-0.5203	0.0151	-0.1087	0.2306	-0.2106	-0.5478	-0.4943	-0.4699	0.062	-0.2484	-0.3632	-0.6235	0.6663	-0.096	-0.7993	-0.4261	0.1322	-0.5061	-0.9407	0.0392	0.1068	-0.3801	0.4174	0.1097	-0.1888	-0.0872	-0.2436	0.2655	0.0048	1.5192	0.2057	-0.091	0.2902	-0.5579	0.1372	-0.1945	0.0838	0.2646	0.222	-0.0144	-0.3501
O60245	PCDH7	Oncology_II	-0.4212	0.3768	0.448	-0.2062	0.0099	0.4735	0.7036	0.1979	-0.3614	-0.2829	-0.44	0.5591	-0.6057	-0.1099	-0.591	0.2929	-0.5162	-0.6943	-0.3739	-0.4119	0.1022	-0.1396	-0.4473	-0.2549	0.275	1.0105	-0.0099	0.2204	0.4844	1.1282	1.882	0.681	-0.2482	-0.6426	0.2124	0.0129	0.5955	0.0691	-0.1465	-0.6183	-0.3049	0.0389	-0.2352	-0.0606	0.4942	0.0509	-0.0887
O60259	KLK8	Oncology	0.2961	0.7336	-0.0327	-0.1259	0.4212	-0.0022	-0.0774	-0.4788	-0.2318	0.015	-0.1971	0.9121	-0.2925	-0.1601	0.6176	0.2858	-0.2036	-0.818	-1.0737	-0.0448	-0.1134	-0.322	-0.4302	0.0029	0.7879	0.9382	0.4242	-0.1224	0.8449	2.0722	-0.3384	0.4709	0.4461	0.466	0.1022	-0.5939	0.5883	-0.0581	0.1986	0.3287	0.2487	-0.5143	-0.5981	-0.1086	-0.6587	-0.1988	-0.0993
O60279	SUSD5	Inflammation_II	-0.4053	0.2172	0.2758	-0.0386	0.9912	0.8669	0.138	0.2618	-0.7822	-0.0768	0.1344	0.3771	-0.3187	-0.1464	-0.4358	-0.0083	0.0035	-0.6002	0.0252	0.0182	-0.9007	0.2767	0.5338	-0.9945	0.2875	0.9706	-0.4457	0.0175	0.4506	1.0553	0.3771	0.2508	0.0688	-0.3401	-0.8139	-0.4269	0.1922	-0.3799	-0.6004	-0.3842	-0.4688	-0.0035	0.1809	-0.4459	0.4338	0.3947	-0.8228
O60437	PPL	Inflammation_II	-0.5988	-0.7101	-0.1421	-0.4636	-0.5031	-0.2258	-0.5962	1.0827	0.0083	0.7096	-0.6468	-0.0652	1.384	0.6779	0.1784	-0.2897	-0.1927	-0.7107	3.0921	0.0365	-0.5312	4.9945	0.3541	0.2909	1.5491	0.9297	1.5	2.1023	1.0036	1.8657	0.3919	0.0336	-0.1237	0.2861	-0.4197	4.0786	0.3037	-0.0541	-0.8559	-0.7067	0.1338	-0.0473	-0.1851	2.5087	1.8838	0.0577	0.5102
O60447	EVI5	Inflammation_II	0.1179	-0.4188	-1.3017	0.3974	-0.2389	0.4891	-1.2761	0.8182	-0.1056	0.5541	-0.4317	0.0725	0.037	-1.0285	-0.6283	-0.8187	-0.0201	-0.9084	0.0783	-1.5029	-1.4254	0.1844	-0.4999	-0.3126	-0.8246	0.1044	-0.2233	-0.3249	0.7285	0.5258	1.0053	-0.8336	-0.8499	0.3936	1.0828	2.2551	0.245	2.2326	-0.83	-0.7261	0.0842	-0.9545	-0.6624	-0.7498	0.813	-0.6164	-1.2727
O60449	LY75	Inflammation	-0.0465	0.0185	0.5939	0.9655	0.9191	0.6515	-0.3466	-0.1457	-0.0167	0.1334	-0.0316	0.3876	0.6568	-0.2548	-0.4333	-0.0676	0.2087	0.0879	-1.9367	-1.0239	-0.1978	-0.1632	-0.486	-0.2569	-0.2077	0.1016	-0.2551	-0.6819	0.3513	0.4681	-0.321	0.0365	0.8533	0.3226	-0.7968	-0.3944	0.3006	0.4119	0.4052	0.0388	-0.9932	-0.4372	-1.5937	0.1325	-0.7962	-0.2657	-0.1098
O60462	NRP2	Neurology	-0.6251	-0.0452	0.3796	0.3784	0.3328	0.3524	0.0777	0.2494	-0.1446	0.291	-0.0995	-0.2376	0.171	-0.1586	0.1942	-0.182	-0.3203	-0.5819	1.0468	-0.4844	0.2011	0.7817	-0.3202	-0.6778	0.0222	-0.0534	0.2308	0.4215	0.8673	0.2827	0.1433	-0.0834	-0.1861	-0.6782	-0.0712	2.4917	0.4382	-0.4222	0.6084	-0.587	-0.0138	-0.1257	-0.0431	0.0173	1.2983	0.3915	-0.2203
O60469	DSCAM	Neurology_II	0.0485	0.1095	0.3963	0.2971	0.2369	-0.4402	-0.3128	0.8557	0.5538	0.6423	0.2163	-0.3997	-0.074	-0.4825	0.138	0.9425	-0.4574	-0.2712	0.0046	-0.4932	-0.0485	-0.4574	-0.2718	-0.754	0.5854	-0.2375	0.136	-0.4189	1.1424	0.1664	-0.4526	-0.5308	0.8601	-0.5185	0.0539	1.4613	0.6105	0.5349	0.9381	-0.3982	-0.612	-0.1178	0.5459	-0.3736	1.265	-0.0651	-0.7263
O60476	MAN1A2	Cardiometabolic_II	-0.371	0.02	0.4682	0.0796	0.1265	-0.5214	0.4777	-0.0828	0.4662	-0.0049	-0.0993	0.8605	0.1632	0.0634	-0.0537	0.0008	-0.4717	-0.3463	0.9174	0.2549	-0.7154	0.0617	0.233	-0.3766	0.2	-0.0088	0.2296	0.983	0.6109	0.3124	-0.322	0.4698	-0.3213	-0.0643	0.4319	0.9277	0.5144	-0.1899	0.0282	-0.8232	-0.0531	0.0241	-0.0671	0.1862	0.9396	-0.0955	0.211
O60496	DOK2	Cardiometabolic	1.3068	0.9251	-0.4812	0.9102	0.7004	1.1351	-0.3549	2.0074	-0.5581	-0.8091	-0.5776	0.4783	0.5316	-0.3539	-0.4025	-0.8997	-0.9147	-0.997	0.0002	-0.6732	-0.468	-0.0002	-0.6792	-0.2516	0.2335	0.1367	0.1416	0.0566	1.6908	0.366	0.3206	-0.5558	0.0687	0.2119	2.783	-0.1116	0.001	3.8948	-0.2365	0.0411	0.0528	0.4402	-0.03	-0.7246	1.3759	-0.6484	-1.001
O60500	NPHS1	Inflammation_II	-0.239	0.9032	0.4225	0.113	0.2682	-0.7484	0.1121	-0.1396	0.7429	-0.5613	0.1462	2.3311	-0.7007	-0.9028	-0.7432	0.5623	0.2536	0.3328	-0.2485	-0.1399	0.6544	-0.1782	0.437	0.1964	-0.2091	-1.2063	-0.3519	-0.3869	-0.1206	-1.0344	0.2213	-0.0347	0.0529	-0.3057	-0.3565	0.1173	0.352	0.0244	0.5585	-0.2102	-0.4369	-0.9128	0.2994	0.0317	-1.0746	0.4255	0.164
O60502	OGA	Oncology_II	0.2865	0.1045	-0.0798	0.7149	0.3039	0.8101	-0.6025	-0.0195	-0.9752	-0.5653	-0.3197	-0.3271	-0.1841	-0.159	0.392	-0.3046	-0.3878	-0.5887	1.4135	-0.0133	-0.4585	0.1229	-0.074	0.1037	-0.0927	0.4751	-0.0753	-0.2602	0.7869	0.9595	0.9873	-0.0488	-0.208	-0.5085	0.5281	2.4793	0.7332	2.1241	-0.5157	-0.0602	0.6535	-0.357	0.4383	-0.7187	0.3668	0.0483	-0.6551
O60542	PSPN	Inflammation	0.3564	-0.219	1.4968	1.3756	1.4475	0.558	-1.7639	-0.2949	0.1619	-2.6398	1.1004	-0.7042	0.2746	1.0474	0.9186	0.9761	1.9574	0.6557	-2.266	0.5221	-1.5071	-2.3477	-0.7316	0.4221	0.9054	1.3923	-0.4789	-1.9478	0.6573	1.2144	-0.7282	0.1838	1.7395	0.161	1.3252	-2.4327	-1.4289	0.807	-1.0687	-0.5781	0.1361	0.4673	0.0763	0.5166	0.0538	-0.1928	0.327
O60575	SPINK4	Inflammation	-0.6502	0.1601	0.645	0.008	-0.6143	-0.3449	1.4871	-0.5608	-0.6332	-0.5155	-0.1411	0.8301	0.0626	-0.3319	-0.0701	0.277	-0.461	-2.2664	-0.5028	-0.008	-0.3538	0.4567	-0.2773	-0.8401	1.1619	1.3886	1.0959	-0.2944	0.3253	3.4631	0.2508	0.8748	-1.1136	1.395	1.7288	-0.2492	0.7682	-1.4554	-0.3123	-1.4404	-1.165	0.6339	-0.848	-0.882	0.9435	0.7838	-0.8692
O60603	TLR2	Oncology_II	-0.7467	-0.0808	-0.0152	-0.3687	-0.0825	-0.1097	-0.1536	-0.4863	-0.093	-0.246	-0.4029	-0.0995	0.1354	0.2669	0.275	-0.0023	-0.0589	-0.1497	0.2029	-0.0861	0.4637	0.5236	0.2355	-0.0163	0.2462	0.24	0.023	-0.1623	0.1247	0.1743	-0.0715	-0.0963	-0.1415	-0.6315	0.0494	0.3736	0.6053	0.0647	-0.0616	-0.9013	0.761	-1.1487	0.0369	0.2526	-0.9894	0.0764	-0.3216
O60609	GFRA3	Neurology	-0.0993	0.418	0.2005	0.5762	0.379	0.0233	0.405	-0.5268	-0.1592	-0.2701	0.3499	0.4437	-0.392	-0.2298	-0.6545	-0.0333	-0.0237	-0.3325	-0.9676	-0.351	-0.8246	-0.3936	-0.1602	0.2282	0.7587	-0.204	-0.1414	0.0408	0.4196	1.3031	-0.0703	0.2884	-0.251	-0.022	-0.3144	3.2999	0.7737	-0.219	-0.7315	0.133	0.3803	-0.2287	-0.1881	-0.706	0.3464	0.3762	-0.2419
O60635	TSPAN1	Cardiometabolic	-0.7831	-0.3722	0.6667	0.1367	-0.2656	-0.1572	-0.5219	-0.2506	2.1201	1.1818	-0.4525	-0.2129	-0.0888	0.0706	0.9668	0.001	1.7065	-0.4001	-0.0764	-0.6063	0.2484	0.9523	1.3514	0.484	2.708	-0.3281	1.8769	0.4242	2.116	-0.0806	-0.592	-0.3806	1.3018	1.6647	0.0601	1.2168	0.6291	-0.2906	-0.03	1.0331	0.9837	0.3554	0.0229	-0.1693	-0.0749	-0.4196	0.8134
O60662	KLHL41	Neurology_II	-0.6406	1.4782	1.0254	-0.309	0.8621	1.003	0.214	-0.6365	-0.1168	-0.1654	-0.2387	-0.8005	-0.9516	-0.951	-0.2053	0.2276	-0.1371	0.5282	0.7513	-0.4719	-0.0542	-0.0736	0.1018	-0.339	1.3625	0.2138	-0.3704	-0.4992	0.6782	1.2261	0.1299	0.6229	0.7315	-0.9702	-1.3604	4.8629	0.2275	-0.5108	-0.2364	-0.0449	-0.4922	-0.8962	0.1722	-0.7813	-0.6962	-0.3572	-0.2732
O60664	PLIN3	Cardiometabolic	-0.3709	0.1419	-0.0308	0.3372	0.2157	0.6733	-0.6818	0.3785	-0.4303	-0.4084	-0.4869	-0.0532	0.3401	-0.2393	0.2562	-0.143	0.0039	-0.6993	1.3962	-0.4244	-0.5021	0.6113	0.0329	-0.5668	0.2773	0.9501	-0.7847	-0.0347	0.8778	1.6615	0.5746	0.7375	-0.2647	-0.0408	-0.2601	0.4612	0.288	0.4547	-0.5734	-0.213	0.2217	-0.2567	-0.2473	-0.1167	1.033	0.5472	-0.1687
O60701	UGDH	Cardiometabolic_II	0.4095	0.3196	-0.1558	0.4972	-0.2658	-0.6712	0.3951	0.0903	-0.3802	-0.1441	-0.0124	-0.8572	-0.0439	1.4417	-0.4582	-0.4027	1.2242	-0.1281	-0.1212	-0.3028	0.449	-0.175	0.8813	-0.2312	-0.1558	1.5632	-0.2063	0.2029	0.4691	-0.1977	0.1592	3.5086	0.202	-0.6821	0.2742	0.3585	-0.0077	0.0077	-0.1844	-0.7851	-0.6948	-0.1124	-0.3641	0.3602	0.1037	0.7757	-0.1324
O60749	SNX2	Oncology_II	1.0221	-0.9498	0.5443	0.7751	0.3619	6.3206	-0.9633	0.1714	-0.6149	1.5951	-0.8004	-0.8954	-0.7671	-0.7252	0.1717	-0.2275	1.3013	-0.7388	2.199	-0.2755	-1.1036	1.452	0.0064	-0.6728	-0.2862	2.1766	-0.8821	0.0782	0.7574	0.322	-0.0707	-0.3648	-0.9358	0.1839	0.7655	-0.2087	0.1287	2.4877	-1.0028	0.6042	0.3461	0.1306	0.1276	-0.7314	-0.5282	-0.4152	-0.4427
O60760	HPGDS	Oncology	0.3596	0.1377	-0.1326	0.2887	-0.1738	0.6912	-0.0605	-0.2204	-0.799	0.0323	-0.3973	-0.0594	-0.2947	-0.3752	-0.1847	0.3854	0.3132	0.3347	-0.102	0.2051	0.4638	-0.9837	-0.8385	0.3874	0.2486	-0.695	0.2566	-0.7111	0.4613	0.7015	-0.6955	-1.2837	0.8879	0.3063	-0.4154	-0.7321	0.6484	-0.1623	-0.1371	-0.1168	-0.2543	-0.3273	-0.142	-0.3157	-0.7458	0.2729	0.7537
O60763	USO1	Oncology	1.2493	0.5475	-2.9204	1.0626	-0.2712	0.8216	-1.7786	1.0474	0.2623	-0.7235	-0.5653	0.4873	0.3088	-1.3218	0.3676	-0.519	-1.4775	-0.8564	3.1851	-0.9084	-1.4221	0.0112	-0.0823	0.5271	-0.6191	0.4899	-1.3687	-1.0039	1.7514	-0.345	0.7316	-0.9227	0.1045	-0.1593	1.6277	3.8323	0.2251	3.3285	-0.1373	-0.4877	1.7037	-0.6658	0.5049	-0.6635	1.8846	-0.1924	-0.0112
O60825	PFKFB2	Oncology	0.0367	-0.1014	-0.9714	0.9559	0.0521	0.6027	-2.0398	-0.0834	-1.7412	-0.9484	0.1783	-0.007	0.0815	0.1314	1.104	-0.1586	0.1617	-0.3878	1.7513	0.0162	-1.9795	0.4408	-0.0142	0.1936	-1.0029	0.3839	-0.5424	0.4716	0.3873	1.4368	1.6844	0.2436	-0.5869	-0.3437	-0.3701	0.7477	1.4179	1.6186	-1.2156	-1.0292	1.9133	-0.7256	0.4691	0.4447	-0.5288	0.5879	-0.0757
O60828	PQBP1	Oncology	-0.1753	-0.6106	-0.0175	-0.2936	-0.0328	-0.7338	0.2523	-0.702	-0.2124	-0.2799	-0.499	-0.8138	0.0835	0.4544	0.2684	-0.7247	0.2653	0.0034	1.4828	-0.1831	1.1142	0.2277	-0.4043	-0.1822	-0.2539	0.6166	-0.5315	-0.6426	0.3741	0.3681	1.0132	0.5048	0.9281	0.5011	0.3016	2.7299	0.7017	0.2558	-0.8416	-0.5395	0.1621	-0.0034	0.2671	-0.1544	0.4464	-0.3839	0.0934
O60869	EDF1	Neurology_II	0.7426	-1.4106	-0.5147	0.5605	-0.6235	0.7536	-0.4711	-0.5655	-0.3062	-0.0677	0.062	-0.9214	-0.629	0.001	-0.5269	-0.1655	-0.5904	-0.7192	0.6711	-1.5088	-1.5312	0.4565	-0.8776	0.1915	0.3119	0.2481	-0.3667	-0.1628	0.6801	1.1353	1.4747	-0.4619	-0.5151	0.3476	0.136	4.9555	0.4042	2.1037	-0.9172	-0.2651	-0.5411	0.4976	-0.5641	1.8269	1.3984	-0.2861	-0.5544
O60880	SH2D1A	Inflammation	0.1052	-0.1355	0.2349	0.2295	-0.4682	0.9585	-0.552	-0.2325	-0.4914	-0.7137	-0.38	-0.1988	-0.1156	0.3875	0.3249	-0.1038	0.1137	-1.0679	0.0347	-0.7342	-0.1444	0.6248	-0.4078	-0.923	0.3635	0.9674	-0.2732	0.2407	0.8143	1.4118	1.756	-0.1395	-0.3841	0.8603	0.8346	0.0291	0.3916	-0.1258	-0.7669	-0.5978	0.5494	-0.8188	-0.2776	-0.4958	0.5097	0.7197	-0.3807
O60884	DNAJA2	Inflammation	1.4067	0.3455	-0.4399	0.6061	0.1742	0.6943	-1.0682	0.0037	-0.0567	-0.5374	-0.6031	0.0213	-0.1904	-0.4418	-0.0322	-0.3561	-0.4209	-0.9956	1.494	-0.5978	-0.9243	0.6981	-0.2864	-0.3277	-0.1914	0.4734	0.0484	-0.01	0.9229	1.3667	0.5546	-0.0037	-0.4853	0.005	0.1356	2.3099	0.5991	2.6624	-0.7622	0.0608	0.4813	-0.7375	0.1599	-0.4968	1.2502	-0.6141	-0.5053
O60890	OPHN1	Neurology_II	1.4581	0.8665	1.8441	1.5003	1.9981	2.2353	-0.6454	0.6649	0.0364	-0.7031	-0.3903	0.1472	0.8378	-0.3741	-0.6662	-1.7324	-1.348	0.6918	1.2839	-1.0649	-1.1522	-0.0635	-0.2529	0.3554	-0.587	-0.0235	-0.0454	0.4404	0.6186	0.4615	0.4871	-0.2496	1.5048	0.488	2.6161	-0.2249	0.063	4.0605	-0.1849	0.1531	-0.1122	-1.0221	0.1269	-0.2576	0.7278	-0.671	-0.4619
O60907	TBL1X	Oncology	1.0008	-0.2617	-0.6584	0.8778	-0.2996	0.2806	0.2427	0.0436	-0.5641	-0.2248	-0.4746	0.9155	-0.3604	-0.5262	-0.0491	-0.9702	-0.78	-0.7624	0.8973	-0.8662	-0.5776	0.6386	-0.5801	-0.1742	-0.093	-0.399	0.1334	0.4497	0.9654	0.0181	-0.0256	1.6585	0.5635	1.6123	0.9596	4.226	-0.2626	1.7224	-0.4205	-0.683	-0.4187	-0.6848	-0.2143	0.1312	1.2555	-0.5818	-0.4107
O60911	CTSV	Oncology	0.1853	1.5448	0.5109	0.2813	0.0985	-0.0091	0.0034	-0.289	-0.0275	-0.018	-0.0067	0.2844	-0.6311	0.0414	-0.0902	-0.0196	0.4583	0.0698	-1.2979	-0.4648	0.3713	-1.1913	-0.7542	-0.8968	0.0455	-1.5549	-0.533	-0.9339	0.0699	-1.0623	-0.2636	-0.2822	1.2457	-0.6558	0.1888	1.7261	0.4942	0.0538	-0.2541	-0.0508	-0.5007	-0.1591	0.0221	-0.4774	-0.3187	0.3037	0.3192
O60934	NBN	Inflammation	0.5447	0.0184	0.2731	-0.2986	-0.5657	-0.4828	-1.3414	1.097	-0.1542	-0.1194	-0.7985	0.0238	-0.1171	-0.3503	0.4563	-0.3481	-0.1901	-0.2911	1.9218	-0.5556	-0.3898	1.4301	-0.1652	0.1562	-0.2196	0.4922	0.3418	0.5438	0.0125	1.4507	1.6655	-0.1562	-0.6001	0.9951	-0.4088	2.973	1.4027	-0.0557	-1.0127	-0.9262	1.0633	-0.2635	0.627	0.5751	1.4124	-0.0796	-0.2621
O60939	SCN2B	Neurology_II	-0.4407	-0.8013	-0.0033	0.595	-0.6263	-0.7887	-1.0248	0.0033	-0.5456	-0.9535	0.2995	-0.8966	-0.3198	-1.3804	0.3341	-1.1822	-1.9128	-0.1264	1.3464	0.1918	0.7428	-0.8625	-0.676	0.6288	0.342	-0.1795	-0.2425	0.6359	-0.1994	0.9544	0.018	0.961	-0.5918	-0.1701	0.3241	0.317	0.5472	-0.7338	0.2328	-1.0265	0.0061	0.1213	0.1589	0.4809	-0.458	-0.7656	0.0862
O60941	DTNB	Oncology_II	-0.5042	0.7927	0.5279	-0.3427	0.95	0.541	-0.2032	-0.1618	-0.2575	-0.0079	-0.1818	-0.0629	-0.0717	-0.0404	-0.635	0.231	-0.2451	-0.3484	1.6921	-0.1239	-0.335	1.6942	0.1026	-0.5411	0.9372	1.3604	0.6006	0.3906	1.5216	2.5254	0.1707	0.6999	-0.6268	-0.3699	-0.2329	4.9827	0.5228	0.4033	-0.1927	-0.3454	-0.0963	-0.6474	-0.1071	0.0941	1.2225	-0.3876	-0.4012
O75015	FCGR3B	Cardiometabolic	-1.3601	0.423	-0.0062	-0.4026	0.5086	0.7087	-1.0121	0.3528	-0.5038	-0.0081	0.3306	0.3829	-0.0568	-0.0117	-0.2653	0.1213	0.2114	0.0949	-0.4424	-0.0917	0.8174	0.3367	-0.2679	-0.773	0.3135	0.2816	-0.55	-0.1088	-0.0298	0.0119	0.5858	0.43	-0.1316	0.1237	-0.2907	0.0529	0	-1.9444	0.345	0.0266	-0.3268	-0.1336	0.2707	0.2883	0.5001	-0.4763	0.2736
O75023	LILRB5	Cardiometabolic	-0.0649	1.1367	0.4384	-0.3632	0.4624	0.9124	-0.0823	-0.0182	0.5787	-0.7166	0.4061	-2.0456	-2.5867	0.7479	0.4847	0.1395	-0.4606	-0.4802	-0.0353	-0.0046	-0.9362	0.1649	-2.0297	0.4545	1.0125	-0.2024	-0.5673	0.2205	-0.0431	0.6517	0.2281	0.1024	-0.6036	0.1284	0.4971	1.1502	0.3777	-0.0953	0.2005	-2.8775	-0.827	0.0799	-0.5088	0.6568	-0.1103	-0.0187	0.099
O75054	IGSF3	Oncology	-0.368	0.2869	0.7382	0.0655	0.2963	-0.4501	-0.2891	0.4184	0.2393	0.3478	-0.6353	-0.1844	-0.1365	-0.3878	0.0192	0.0049	-0.6338	-0.7642	0.0305	0.5209	-0.8207	0.5955	-0.4766	-0.5479	-0.348	-0.6557	0.094	0.1526	0.528	0.6522	-0.0081	-0.317	-0.0409	-0.754	-0.0361	2.4097	0.3041	-0.7218	0.3304	-0.4699	-0.392	-0.0024	0.537	-0.603	1.4749	-0.1895	0.6259
O75061	DNAJC6	Cardiometabolic_II	1.3776	0.552	-0.0106	0.213	0.2151	1.6669	-1.6063	0.2622	0.3808	-0.57	-0.2665	-0.387	-0.1045	-0.6316	0.3713	0.2431	0.4692	-0.8059	3.3268	0.2162	-1.2161	-0.2953	-0.1148	-0.1284	-0.2178	0.3446	-0.2622	0.0044	1.1866	1.8818	1.1461	-0.3397	-0.5051	-0.2435	1.1499	3.2924	1.1869	2.2743	-1.3409	-0.3002	1.2779	-0.0442	1.1388	-0.5964	0.295	0.1803	-1.3216
O75071	EFCAB14	Oncology_II	-0.1101	0.2119	0.4916	0.0074	0.4743	0.3031	0.1822	-0.0074	-0.6118	-0.2459	-0.1492	0.3428	-0.0256	0.3088	-0.3657	-0.3915	-0.4766	-1.1396	0.2719	-0.1913	-0.3646	1.0094	0.0285	-0.7203	0.4104	1.8678	0.448	1.0753	0.8015	2.5825	-0.1188	0.3102	-0.2051	0.3767	-0.0572	0.5072	0.2773	-0.1583	-0.5334	-0.266	-0.314	0.0829	0.1104	-0.7642	0.7679	-0.0653	-0.3356
O75077	ADAM23	Inflammation	-0.2657	-0.1195	0.4822	0.2165	0.5878	0.2076	0.5813	-1.3362	-0.9858	0.0132	-0.3218	0.3142	0.4504	0.0741	-0.2621	0.1371	0.289	-0.2309	0.4269	-0.3427	-0.3073	-0.205	-0.2654	-0.4075	0.7119	0.3501	-0.6476	-0.1311	0.5078	0.6626	0.2499	-0.4668	0.0591	-0.3617	-0.1476	-0.0195	0.4327	-0.4161	-0.0311	-0.016	-0.754	-0.1384	-0.7474	-0.6431	0.2748	0.6072	-0.0184
O75121	MFAP3L	Neurology_II	-0.8415	0.6753	0.2869	0.8625	0.0018	-0.4979	-0.2706	0.4338	0.2368	-0.0091	0.1545	1.856	0.6918	-0.5285	0.4763	-0.6046	-1.5276	2.5222	1.0521	-0.1963	0.1476	-0.2094	0.5265	2.5338	-0.5795	0.2192	-0.1575	-0.2972	1.0864	1.6562	5.4539	-0.6473	-0.8163	-0.2297	-0.5183	0.6156	0.3149	0.0985	-0.0059	-1.8933	0.1471	-0.1027	-0.0889	0.4569	-0.0325	-0.5956	-0.524
O75144	ICOSLG	Oncology	0.0068	-0.1238	-0.1097	-0.1758	0.5581	0.0334	0.2924	0.1713	-0.3554	-0.0141	0.2687	0.0576	-0.0549	0.0453	-0.2459	-0.2453	0.1164	-0.5922	-0.7267	-0.1896	-0.0283	-0.1498	-0.0852	0.2644	0.3839	0.0553	-0.162	-0.2253	0.2692	0.7826	-0.1452	0.5666	0.4292	0.009	-0.4758	-0.2254	0.0346	-0.2888	-0.2577	-0.1596	0.0064	0.0048	-0.096	-0.3297	-0.1397	0.18	0.0285
O75146	HIP1R	Neurology_II	-0.8908	-0.3694	-0.0852	-0.2092	0.1397	0.0005	-0.9281	0.4429	0.1664	-0.1355	-0.0005	0.2938	0.5915	0.2585	-0.2969	-0.1181	-0.307	-1.2132	2.4116	0.1203	-0.5807	3.6294	-0.131	1.1116	0.558	1.1267	0.7589	0.7644	1.9685	2.7156	1.221	0.0792	-1.2792	-0.1925	-0.8369	7.4129	0.3812	-0.8693	-0.416	0.2831	0.2484	-0.2406	-0.274	1.2944	2.5573	0.1821	0.0892
O75154	RAB11FIP3	Cardiometabolic_II	2.4609	1.2813	-1.0972	1.2795	1.7744	0.3498	-0.5557	1.2129	-0.1103	-1.7878	-0.4475	1.6291	0.7199	-0.6059	-0.0318	-1.7707	-1.5486	-0.6817	0.8924	-1.5119	-0.9868	-0.154	-0.5678	0.1231	0.0562	-0.0398	-0.1424	0.2987	2.6599	-0.1473	0.5092	-1.0527	0.8949	0.4495	3.312	-0.4893	-0.6459	4.751	-0.1861	1.014	0.5266	-1.2041	-0.0205	-1.4041	2.498	-1.0454	-0.2534
O75167	PHACTR2	Neurology_II	2.5298	0.6011	-0.7231	1.5556	0.7067	0.504	-0.6814	0.5191	-0.1827	-0.7177	-0.6008	-0.2447	0.482	-0.9853	0.2515	-0.9494	-0.6869	-0.7275	0.0723	4.6185	-0.7658	0.576	0.0787	0.4822	-0.3122	-0.7837	-0.4288	-0.2331	1.041	0.4367	0.7977	-0.3322	-0.1464	0.2237	2.3302	0.792	-0.0401	4.7866	-0.6802	0.4663	-0.06	-0.8063	0.0401	0.4869	1.2573	-0.8559	-0.3084
O75173	ADAMTS4	Inflammation_II	-0.6317	0.4434	-0.0183	-0.6306	-0.5076	-0.3002	-0.0265	-0.3364	-0.2787	0.1931	-0.4925	0.8039	0.6259	-0.0899	-0.431	-0.3078	-0.14	-0.979	1.0232	-0.4937	-0.1582	1.5408	-0.0046	-0.0966	0.3386	0.9014	0.833	0.4755	0.9165	1.6557	-0.2109	-0.7393	-0.6981	0.4334	0.7038	1.6452	0.2392	-0.0944	-0.0781	-0.8875	0.3284	0.1561	-0.3731	-0.6564	1.0586	-0.6325	-0.5084
O75190	DNAJB6	Inflammation_II	0.9743	-0.128	-0.1581	0.416	0.6784	0.538	-0.5346	0.726	-0.3322	-0.1915	-0.2804	-0.0451	0.0073	-0.3706	-0.2677	-0.1204	-0.223	-0.4886	1.1692	-0.2192	-0.4829	0.83	-0.1576	-0.4279	0.1091	0.4184	-0.049	0.0023	0.6473	0.9151	0.3927	-0.4994	-0.3014	-0.373	1.1319	1.4836	0.0383	1.8348	0.0544	0.0892	0.1469	-0.5575	-0.0356	-0.0388	1.474	-0.2758	-0.2739
O75223	GGCT	Cardiometabolic_II	1.1723	0.1188	-0.6818	0.0068	-0.4721	0.5593	-0.6557	-0.4388	-0.1111	-0.5445	-0.5682	-0.2949	-0.8709	-0.6172	0.3664	0.1906	-0.3631	-0.2612	2.0412	0.0275	-0.6658	0.0693	-0.2722	0.7042	-0.024	0.2464	-0.6874	-0.0068	1.3266	1.6311	1.1111	-0.1916	0.1742	-0.517	0.0917	2.3633	0.879	1.1502	-0.6014	-1.0472	0.7017	-1.2982	0.4061	-0.3421	0.5173	0.395	-0.4467
O75293	GADD45B	Oncology_II	0.0603	4.7906	0.1106	0.0467	0.0853	-0.4116	0.3545	-0.3333	0.2799	-0.2309	0.4498	-0.6629	-0.1892	-0.4147	0.3796	-0.1778	3.3893	0.0672	0.3879	-0.1227	-0.0297	-0.0535	0.6384	-0.0242	-0.004	0.4026	0.2152	0.1966	0.267	0.1954	0.5575	1.8792	-0.0506	-0.4191	1.6891	0.1188	0.158	-0.1349	-0.1752	-0.8768	-0.4242	0.0928	-0.001	0.3653	-0.0381	0.4427	-0.4603
O75312	ZPR1	Neurology_II	-0.3925	1.0642	0.1433	0.0062	-0.1441	0.3383	0.4582	-0.1646	-0.3128	0.4837	-1.0578	-0.2413	-0.1252	-1.6	1.0788	-0.3835	-0.2961	1.834	1.0365	-0.5178	0.3551	1.1817	1.4929	-0.2117	-0.4973	-0.2513	-0.6379	4.3787	-0.0062	0.1262	0.0221	2.028	-0.6088	-0.0229	-0.044	2.1332	-0.6744	-0.3025	1.4028	-0.7454	-0.0927	-0.0932	-0.1648	-0.1705	0.6081	0.3176	0.2514
O75326	SEMA7A	Cardiometabolic	0.0654	0.3636	0.6664	0.2348	0.5163	-0.0431	-0.2493	-0.057	0.0912	0.4968	-0.3767	0.335	-0.1527	-0.2673	-0.3693	0.2063	-0.0395	-0.3902	0.5075	0.0316	-0.0856	0.1504	-0.015	-0.8001	-0.4392	-0.2198	-0.0147	-0.0885	0.7838	0.5129	0.1142	-0.4999	0.157	2.0658	0.123	1.0205	0.419	-0.389	0.5943	-0.107	-0.1129	-0.2468	0.4454	-0.0619	1.0962	0.3357	-0.1352
O75330	HMMR	Oncology_II	0.1528	0.723	0.1524	1.7829	0.1386	0.1509	-0.0909	0.2521	-0.0118	0.0702	0.1691	-0.6591	-0.1867	-0.4818	-0.0009	-0.6953	0.0929	-0.1587	0.4121	0.0003	0.1243	-0.0374	0.2253	-0.2112	0.0852	-0.2061	0.2532	0.288	-0.2649	0.1826	0.0458	1.0091	-0.4614	-0.3632	-0.175	0.9814	-0.647	-0.0822	-0.4855	-1.2473	-0.2266	0.307	-0.1276	0.1036	0.2321	0.211	0.2429
O75339	CILP	Cardiometabolic_II	0.0981	0.5961	1.0647	-0.1827	-0.9084	0.0739	-0.3802	-0.196	0.5924	-0.7524	-0.6038	-0.3502	-1.0245	0.0488	0.7658	-0.7542	-0.5173	-0.7847	-0.9168	0.2565	-0.359	-0.0381	0.5279	-2.1305	1.5448	0.9523	0.4989	0.097	0.4532	0.8547	0.3664	-1.1832	0.2544	-1.3834	1.0182	0.0083	-0.3589	1.0338	-0.9745	-0.1576	-0.238	-0.1138	-0.9006	-1.1281	1.0761	0.4073	-0.434
O75340	PDCD6	Cardiometabolic	-0.5042	0.4126	0.0805	0.3627	-0.4237	0.1079	-0.5269	0.0887	0.1612	0.1307	-0.0767	0.15	0.226	-1.0997	-0.2877	-0.1423	-0.0303	-0.0631	0.6582	0.1544	0.226	0.0354	-0.1585	0.1268	0.326	-0.0085	0.3939	-0.8879	0.8514	0.8722	0.1806	0.0016	-0.992	-0.1862	-0.228	2.1008	-0.4362	-1.0093	0.2589	-0.2815	0.0192	0.1047	0.2268	-1.0753	0.6528	-0.0833	0.2713
O75347	TBCA	Inflammation_II	1.0268	-0.5104	-0.5492	0.8556	0.1888	0.7278	-2.1745	1.7179	0.0283	0.4028	-0.4708	-0.6293	-0.8726	-0.7869	0.4733	0.5416	0.2858	-0.4396	3.2877	-0.104	-0.8809	-0.2881	1.0759	-0.6962	-0.3077	0.6734	-0.8739	-0.344	1.1691	2.1722	0.7615	-0.4131	-1.1013	-0.8214	-0.0283	2.789	1.2522	1.9056	-1.6182	-1.513	1.5498	-1.0161	0.935	-0.5466	0.3465	0.3556	-0.8463
O75348	ATP6V1G1	Cardiometabolic_II	2.4276	-0.3454	0.2604	1.1176	-0.513	0.8397	-0.0214	-0.2523	-0.97	-1.2544	-0.9771	-1.316	-1.4854	-0.3103	-0.2382	-0.6192	0.5425	-1.4018	1.3147	1.2897	-1.0782	-0.2528	-0.7939	-0.4254	-0.6347	0.516	-0.1896	-0.4061	0.4662	0.7143	0.4084	1.691	0.2654	0.0402	1.167	1.9004	1.8687	2.6833	-1.2755	-0.1756	0.8138	-0.8673	1.5133	-0.9778	0.2723	-0.6856	-0.8755
O75351	VPS4B	Oncology_II	1.3801	-0.2891	0.0175	0.9984	0.82	0.9222	-0.0504	-0.5005	-0.4697	-0.4129	-0.0801	1.5822	0.1172	-0.0683	-0.437	0.0044	-1.0014	-0.7775	1.1135	-0.5823	-0.4909	0.3469	-0.0871	0.0042	-0.3826	-0.1721	-0.2058	-0.2816	0.6768	0.343	0.7678	1.2292	-0.2914	-0.5725	0.5176	1.4472	-0.5311	2.9487	-0.264	-0.1298	-0.3428	-0.1959	0.2704	0.1663	0.966	-0.3746	-0.1074
O75354	ENTPD6	Cardiometabolic	-0.7054	0.1852	0.3559	0.3176	0.0721	0.4329	0.1131	-0.1995	0.0026	0.0593	-0.2664	0.8481	-0.045	-1.1953	-0.2367	0.0734	-1.034	-0.4554	0.1524	-0.2244	-0.2599	-0.4023	-0.0093	0.0325	0.3709	0.0124	0.0669	0.0798	0.397	-0.0017	-0.1199	0.016	0.0017	-0.0477	0.0766	1.1275	0.064	-0.0726	0.272	-0.1521	-0.2859	0.0718	-0.0788	-0.2107	0.1546	-0.2097	-0.1106
O75356	ENTPD5	Cardiometabolic	0.0462	-0.2169	-0.4565	-0.1861	0.1276	-0.0868	-0.0276	0.3106	-0.3184	0.2862	0.1359	0.3853	-0.021	-0.2184	-0.0956	0.2244	0.0173	-0.3969	-0.0059	0.2858	0.0059	-0.4612	-0.1322	0.0315	0.3212	-0.3443	0.2185	-0.0371	0.3306	-0.1733	0.1103	0.0824	0.0645	-0.0778	0.1163	0.5235	-0.1532	0.1191	-0.059	-0.1182	0.1343	-0.0809	0.1236	0.0778	0.441	0.047	-0.1898
O75365	PTP4A3	Inflammation_II	-0.658	-0.5891	0	-0.2464	-0.8991	0.2195	-0.8022	-0.0552	-0.3511	-0.4037	-0.6548	-0.2651	1.5992	-0.8053	0.3307	0.0043	-0.2672	-0.4649	0.5743	-0.4337	-0.1764	-0.2623	2.5289	-0.859	1.0908	0.3546	0.2345	-0.1504	0.3286	0.9812	0.5778	0.424	1.7104	-0.4496	0.146	0.7565	0.2988	0.069	-0.4555	-1.1611	0.3607	-0.3509	0.4425	0.273	0.1129	-0.419	-0.2754
O75380	NDUFS6	Oncology	-0.0131	0.3615	-0.2471	0.0112	0.6667	-0.1807	-1.018	-0.6899	-1.0254	0.7391	0.0062	0.3857	-0.4353	-0.4254	-1.001	-0.0462	-1.5059	0.0102	2.5426	-0.8602	-2.1453	1.9482	-0.4398	-1.0241	1.1408	0.947	1.2953	0.4278	1.1105	2.2283	0.4615	-0.153	1.4335	0.2232	-0.3204	2.7124	0.7534	0.9464	-0.0742	-0.4321	-0.5427	-1.0392	-0.3782	-0.0644	0.4569	-0.8452	-0.5551
O75409	H2AP	Oncology_II	-0.1382	-0.3161	-0.3793	-0.2434	-0.0473	-0.3657	-0.4506	-0.2436	0.103	-1.0291	-0.332	-0.0381	-0.2398	-0.4891	-0.1263	-0.3825	0.0751	-0.2456	0.132	0.7959	0.2265	-0.2212	0.758	-0.105	0.126	0.1942	0.3754	0.3496	0.0534	0.5637	0.5156	0.6083	0.3954	-0.1985	0.3632	-0.0981	-0.2947	-0.1049	0.3421	-1.1694	-0.0249	-0.2705	0.0969	0.2362	0.3486	-0.2312	1.191
O75427	LRCH4	Cardiometabolic_II	-0.0648	-0.814	-0.4656	0.5998	0.6321	0.3546	-1.2793	-0.0597	0.1854	-0.6357	-0.7897	-0.1	-0.4008	0.1328	0.8027	-0.2223	-0.6757	-0.8177	0.465	-0.0768	-0.9385	0.1737	0.2962	0.426	-0.2304	0.677	0.8203	0.2062	0.8388	1.2515	1.7332	-0.8022	-0.9451	-0.438	0.1564	0.9645	1.0093	1.1807	-0.1541	-0.6941	1.56	-0.4812	0.5006	-0.7022	0.1091	-0.2857	-0.2424
O75460	ERN1	Oncology_II	-0.4665	0.4246	-0.8891	-0.0998	0.3156	-0.2533	0.0577	0.2953	-0.0928	0.6678	-0.8934	0.3888	0.563	-0.7365	-0.0328	-0.0285	-0.1256	-0.3974	-0.3813	0.6923	-0.3198	0.2324	0.28	0.0677	-0.3161	-0.2546	-0.1458	0.4553	-0.0522	-0.284	0.5983	-0.2879	-0.5799	-0.3538	0.1114	0.7466	-0.1638	0.5266	0.5398	-0.6319	-0.7499	-0.2157	-0.6601	-0.0008	0.4321	-0.6244	0.5591
O75462	CRLF1	Inflammation	-0.3065	0.4255	0.4458	-0.2515	0.1516	0.18	-0.3863	-0.0719	0.0322	-0.2709	-0.0445	-0.3827	-0.387	0.1705	-0.0848	0.0972	-0.4242	-0.2234	-0.5126	0.0128	-0.6526	-0.2278	0.0518	-0.0943	0.2999	-0.0775	0.2484	0.0491	0.5804	0.152	-0.3457	0.6063	0.2591	-0.1331	-0.1969	1.455	0.2365	-0.4886	0.1218	-1.1695	0.047	-0.2119	-0.7164	0.2424	0.2983	0.0217	0.0364
O75475	PSIP1	Inflammation	0.2141	-0.1373	-0.239	-0.1259	-0.2926	0.0799	-0.9425	-0.2751	0.6694	-0.0294	-0.0005	-0.6086	-0.0268	-0.34	0.2703	0.0224	-0.4569	-0.1898	1.8201	-0.4463	-0.3716	1.4739	-0.265	0.0005	0.0403	0.148	0.6833	0.4604	1.108	1.4207	1.8075	0.0454	-0.5311	0.2916	-1.2291	5.7537	0.8587	0.2727	-0.8991	-0.708	0.4165	0.3683	0.1543	2.3071	1.9667	-0.252	0.8343
O75493	CA11	Oncology	0.227	-0.2437	0.0647	0.342	0.0979	0.2704	-0.085	0.0247	3.4909	0.2937	-0.1215	-0.0272	-0.1709	-0.2135	-0.2197	-0.0848	1.5107	-0.0109	1.2409	-0.3366	-0.1521	-0.17	-0.4479	0.1299	-0.0275	-0.2027	-0.2203	-0.0155	0.2316	-0.0042	-0.1529	0.163	0.2448	0.2246	0.7316	-0.0301	-0.0437	-0.0465	0.3626	2.2811	0.0064	-0.0384	0.0042	-0.4597	-0.4234	0.444	-0.0394
O75506	HSBP1	Cardiometabolic_II	1.1257	-0.6081	-0.653	0.8279	0.1011	1.8485	-1.1666	0.1893	-0.0185	-0.5924	-0.4388	-0.2161	0.2889	-0.7735	-0.04	-0.8121	-0.5641	-0.6419	1.078	-0.7022	-0.7226	1.2346	-0.5486	0.6086	-0.2414	0.8211	0.5616	0.4417	1.0733	1.3507	1.3044	-0.0253	-1.3301	-0.3456	2.154	2.8161	0.4526	1.5015	-0.4675	0.0181	0.1572	-0.6606	-0.3563	-0.4776	0.4851	-0.2913	-0.4583
O75509	TNFRSF21	Neurology	-0.263	0.0571	0.2727	0.0807	0.5164	0.2271	-0.3378	-0.227	-0.4149	-0.0264	0.1627	0.2581	0.1839	-0.0148	-0.1854	-0.2929	0.1219	-0.5291	0.2088	-0.374	-0.4975	0.5546	-0.0185	-0.8039	0.6632	0.7441	-0.0195	0.1365	0.836	1.351	0.3863	0.8363	-0.4224	0.1879	-0.3739	1.6922	0.0078	-0.5595	0.1078	-0.5052	-0.5898	-0.2917	-0.112	-0.0454	0.3698	0.1036	-0.2423
O75521	ECI2	Cardiometabolic_II	1.644	0.067	0.2332	-0.2818	-0.4003	-0.6939	-0.4706	-0.6269	-0.4956	0.863	-0.2079	0.0967	4.0511	-1.2931	0.1747	-0.7366	-0.8743	-0.2327	0.4535	2.2653	-0.0015	0.4478	-0.2557	-0.9388	0.4527	-0.0248	0.3189	0.0881	0.3938	0.1134	0.8131	0.4438	-1.2109	-0.7881	0.7434	0.9453	0.2192	1.8552	-0.9816	-1.0174	-0.5214	-0.3767	-0.4379	1.2399	0.5861	0.7293	-0.2343
O75528	TADA3	Oncology_II	1.0134	0.1142	-0.3861	0.3102	-0.7058	0.8716	-1.434	-0.0854	-0.3458	-0.821	-0.5634	0.086	-0.9526	-0.4341	0.2737	-0.3182	-0.4847	-0.1035	0.8591	0.1073	-0.4747	-0.057	0.2222	-0.4805	-0.0145	-0.139	0.677	-0.4082	0.0954	0.1208	0.0406	-0.1765	-0.4478	-0.0309	0.6052	0.8845	0.4566	2.342	-0.1572	0.6942	0.1362	0.2067	0.273	-0.4762	0.6513	-0.143	-0.0886
O75534	CSDE1	Cardiometabolic_II	0.4246	0.0196	-0.4279	0.4128	0.6368	0.5717	-1.0366	0.1354	-0.6319	-0.1987	-0.8644	-0.0336	-0.3656	-0.8081	-0.6649	-0.2449	0.8276	2.6577	-0.6721	-1.1604	-0.3087	0.0338	0.0213	0.5084	-0.1462	0.9303	0.2394	0.0383	0.3937	0.2524	-0.1871	1.5801	0.6609	0.3945	0.9578	0.416	0.2802	1.8956	-0.7216	-1.2554	-0.0154	-0.544	-0.9953	-0.5028	0.4238	-0.4645	-0.2575
O75563	SKAP2	Inflammation	0.6901	1.7407	-1.36	0.2253	0.5498	0.5314	-1.3316	1.2654	-0.113	-1.1932	-0.3115	1.0755	0.5423	-0.965	-0.1701	-1.1395	-1.0809	-0.949	0.5107	-0.9259	-1.1256	0.4697	-0.4353	0.0435	0.9836	0.3332	0.3648	-0.2066	2.0054	0.1301	0.9543	-1.0272	-0.7382	-0.064	3.1816	0.0023	-0.4258	3.3241	-0.8449	-0.1697	0.714	-1.2313	-0.4439	-0.5831	2.6586	-0.8091	-0.6096
O75569	PRKRA	Oncology	0.7975	-0.9598	-0.3596	1.2786	0.7666	1.2168	-0.8946	-0.5076	0.2733	0.6032	-1.0553	-0.2069	-0.6387	-0.0195	0.3784	0.0195	-0.1763	-0.2268	3.4621	0.1181	-0.6797	-0.6867	-0.5249	-0.4119	-0.2462	0.194	-0.8335	-0.7049	0.1495	0.3652	0.6156	-0.1037	0.6169	0.5687	-0.2533	1.5895	1.3346	1.5216	-0.5679	0.2918	0.1828	0.0411	0.6525	0.105	-0.2917	0.088	-0.5092
O75592	MYCBP2	Neurology_II	-0.1835	-0.6739	1.2987	3.6386	-0.5313	0.1243	4.5155	0.0305	0.2994	-0.9983	-0.8451	-0.8667	-0.2226	-0.1435	-0.0568	-0.3999	-1.0098	-0.8366	1.4755	-0.0654	-0.8068	1.0038	-0.7804	-0.3813	-0.5499	0.4652	-0.3085	-0.0267	1.6619	1.0068	-0.5231	-0.1631	-0.4425	0.8695	0.0362	0.6267	0.6253	0.9697	1.0876	2.9585	0.4909	2.3447	-0.0659	0.0151	-0.0791	-0.5783	-0.4797
O75629	CREG1	Oncology	0.0786	1.0213	0.3264	-0.2336	0.365	-0.3932	-0.3359	0.8985	-0.0246	0.598	-0.4011	0.6175	0.021	-0.0714	-0.5761	-0.3244	-0.2248	-0.791	-0.1417	0.5452	0.0613	-0.0137	-0.3818	-0.0717	0.1081	-0.419	-0.1459	-0.7087	0.7109	-0.0766	0.0582	0.3997	0.0672	-0.2756	0.2655	1.0554	1.3617	-0.3529	0.1894	-0.773	-0.2045	-0.2858	0.761	-0.2907	0.7696	0.2285	-0.3141
O75631	UPK3A	Neurology_II	0.0237	-0.7371	0.5431	0.7499	-0.7245	-0.4495	-0.582	-0.192	-1.2309	0.0008	-0.1393	0.6154	-0.0869	0.4058	1.175	-0.3684	-0.1287	0.7554	0.5187	-0.1788	1.0788	-0.0809	-0.2479	-0.0292	0.1568	-0.1929	-0.2039	-0.0008	0.0876	-0.7818	0.3805	-0.5092	-0.6063	0.3683	-0.2413	0.3664	0.235	0.5227	0.3471	-1.1353	-0.2823	-1.6563	-0.202	0.2159	0.9801	-0.4812	-0.3856
O75665	OFD1	Oncology_II	0.0124	0.567	-0.1479	0.3659	0.0888	3.6545	-0.1194	0.359	-0.1975	-0.3844	-0.9957	-0.0124	-0.6941	-0.296	0.3656	0.1563	0.0147	0.2699	2.3169	-1.0286	3.3401	2.2064	-0.1804	-0.8959	-0.6367	0.2027	-0.4934	0.7217	-0.1431	0.6786	0.6182	0.1611	0.5671	-0.0607	-0.445	1.2909	-0.4982	-0.3321	-0.2816	-0.9865	-0.5896	-0.6725	0.2264	0.196	0.3725	-0.2829	-0.7651
O75688	PPM1B	Inflammation_II	-0.3776	-0.1541	0.0053	0.5458	0.2586	0.4262	-0.6188	0.6384	-0.4951	0.0747	-0.147	-0.6146	0.079	-1.3782	0.3142	-0.3236	-3.0668	-2.1761	0.3348	-2.058	-0.4208	0.499	0.823	-0.4351	-0.2469	-0.5582	0.4125	-0.0851	0.4549	0.5684	0.2918	1.5205	-0.4837	0.5391	-0.6792	2.73	-0.2817	0.3581	-0.7695	-1.0957	-0.5136	-0.3167	0.1969	-0.3134	0.6153	-0.5862	0.2048
O75695	RP2	Oncology	0.0709	-0.0021	-0.9321	-0.256	0.241	0.0986	-0.2051	0.048	0.1185	-0.0453	-0.1865	-0.1237	-0.1757	-0.3319	0.1115	-0.5948	-0.0604	-0.2036	0.9472	-0.0867	0.1404	-0.4249	-0.3137	-0.4158	0.18	-0.2974	0.1764	-0.0336	0.2462	0.3674	0.5022	-0.1197	-0.1476	-0.0592	-0.631	1.0322	0.5246	0.715	-0.553	-0.3283	-0.0678	-0.4173	-0.3127	-0.2228	-0.9995	0.0141	-0.6379
O75711	SCRG1	Cardiometabolic_II	-0.4496	0.473	0.2308	-0.2806	0.2091	-0.0743	0.3154	-0.1536	-0.2403	-0.089	0.0662	0.3319	0.4475	0.4101	-0.3161	0.3041	-0.1894	-1.2912	-0.5774	0.9622	-0.7186	0.2416	-0.6056	-0.4666	1.0302	1.8242	0.0064	0.853	1.1574	1.897	-0.0401	-0.1873	-0.4493	-0.0064	-0.3439	0.0157	1.0134	-0.4061	0.0803	-0.5851	-0.2287	-0.1425	0.0512	-0.2907	1.4308	0.2044	-0.4264
O75718	CRTAP	Neurology_II	0.6129	-0.017	0.2279	0.0035	0.3914	0.4677	-0.189	-0.1261	-0.1245	-0.2936	-0.4568	-0.0785	-0.0099	-0.297	-0.1645	0.268	-0.0022	-0.3292	0.0076	0.4929	0.4038	-0.5079	0.0274	-0.1183	-0.0243	-0.0636	0.5816	0.3224	-0.2123	-0.2861	0.4681	-0.0093	-0.5942	-0.0867	0.4749	-0.3398	-0.0687	1.3465	1.1588	0.6358	0.403	-0.5524	0.2732	0.0749	0.191	-0.5722	-0.1273
O75781	PALM	Oncology_II	-0.4649	0.3777	0.5417	0.306	0.3314	0.3455	0.0458	-0.2286	-0.88	0.2651	-0.1116	0.33	-0.0186	0.0728	-0.0082	-0.3165	-0.1393	-0.646	1.3481	-0.08	-0.2989	0.5833	-0.0922	-0.8953	0.6991	1.5329	0.8344	0.1707	0.7063	3.1255	0.0159	0.2033	-0.1085	-0.013	-0.2808	-0.0038	0.7237	-0.1751	-0.0174	-0.1799	-0.5829	-0.1914	-0.1495	0.0038	0.5623	-0.2011	-0.3695
O75787	ATP6AP2	Oncology	-0.0708	-0.0628	-0.0012	0.0954	0.0824	-0.1545	0.0932	-0.8037	-0.243	-0.0912	-0.5208	0.4506	-0.3436	-0.1859	-0.3299	0.0259	0.4098	-0.9228	0.703	-0.6101	0.5004	0.1758	0.8673	-0.0936	0.1059	0.719	0.5817	-0.5592	1.1747	0.7844	-0.1255	-0.6395	-0.0416	-0.1986	0.3196	1.5008	1.0251	-0.3635	0.0311	-1.1155	-0.5333	0.2577	0.3251	-0.2344	0.5722	0.2657	0.0073
O75791	GRAP2	Cardiometabolic	3.1063	1.5323	-1.1273	2.1029	1.7522	2.253	-0.6766	1.836	-0.0029	-1.5499	-0.7851	-0.0053	0.2126	-0.8486	0.0029	-1.4353	-1.2249	-1.1371	0.4261	-1.3658	-1.6534	-0.4332	-1.0443	-0.1155	0.1248	0.2718	-0.6108	0.0103	1.1681	0.0567	0.8628	-1.4835	0.8586	0.2563	3.3397	0.0423	-0.3413	4.7053	-1.1959	1.1253	0.8186	-0.3977	-0.1086	-1.12	1.161	-0.5623	-0.8363
O75792	RNASEH2A	Neurology_II	0.5859	0.2879	-0.4395	0.4257	-0.5285	-0.0061	-0.3958	-0.2178	-0.1671	0.1108	-0.5912	-0.7587	-0.2424	-0.2879	0.0611	-0.3026	-0.1765	-0.071	-0.0567	-0.0016	0.0016	0.7639	-0.4214	-0.417	0.9922	0.8459	-0.0441	-0.1729	0.606	0.2318	0.4529	0.474	-0.2615	-0.1115	0.3414	3.0939	0.3215	1.383	-0.2476	-0.3089	0.7795	-0.1896	0.8322	-0.1565	0.5205	-0.0698	-0.5444
O75794	CDC123	Oncology_II	-0.1515	0.375	-0.0655	-0.0857	0.7742	-0.7071	-0.6844	-0.1654	0.312	0.6302	0.1978	-1.0231	-0.1202	-0.312	0.6763	0.3853	-0.2915	-0.534	0.3759	0.1689	-0.3315	-0.4265	0.0539	-0.2948	0.3546	0.1617	0.4952	0.7045	-0.166	0.0719	0.679	1.7692	0.688	-0.6664	1.1372	0.8518	-0.1935	-0.3215	0.0756	-0.5751	0.279	-0.1849	-0.0292	0.2869	0.3795	-0.2747	0.0833
O75830	SERPINI2	Oncology_II	-0.8117	-0.1402	-0.91	-1.2434	0.69	0.0792	0.4789	-1.7095	-0.1396	0.4785	-0.4081	-0.5804	-0.2674	0.6498	-0.9181	0.1946	-1.8248	-1.7693	-1.1778	0.3707	-0.055	-2.799	1.0481	2.6091	-0.2564	-1.686	0.5822	-1.0146	-0.1619	-0.7595	-2.2475	-0.3092	0.0957	-0.2257	2.3981	1.5347	1.3224	1.1253	0.5308	-0.8634	-0.9356	0.3489	0.4462	0.0665	0.1154	-1.0898	-1.541
O75843	AP1G2	Oncology_II	1.4044	0.5704	-0.6864	0.4696	0.3353	0.6575	-0.7657	-0.0961	-0.5503	0.1965	-0.0877	0.425	-0.1806	-0.2358	0.2261	-0.958	-0.3808	1.4072	1.227	-0.3909	-0.5592	0.7062	-0.2811	-0.2832	-0.2359	0.5849	0.5079	0.1279	1.5569	0.6112	0.7283	-0.5604	0.2684	-0.29	0.5476	2.1697	-0.0017	2.621	-0.3865	-0.1418	0.6975	-1.118	0.1965	-0.8596	1.4328	-0.5191	-0.605
O75882-2	ATRN	Inflammation_II	-0.5944	0.0408	0.2894	0.2789	0.059	-0.0359	0.0659	-0.1026	-0.1211	-0.1772	0.0379	0.3242	-0.3505	0.1388	-0.1932	0.1639	0.0649	-0.5317	-0.3901	-0.08	0.1593	-0.3013	0.271	-0.0205	0.3848	-0.3201	0.3033	-0.0581	0.3448	-0.2239	-0.129	-0.7001	0.1472	-0.2642	0.0695	0.2085	-0.0286	0.1929	0.2402	-0.1629	-0.1727	0.0248	-0.3798	-0.09	0.2799	-0.0683	0.0071
O75888	TNFSF13	Inflammation	-0.3279	0.4487	0.1448	-0.2874	0.3787	0.2797	-0.7742	0.2459	-0.5522	-0.0091	-0.3418	0.5809	-0.1234	-0.5908	-0.5646	-0.3135	0.0091	-0.4863	0.0291	-0.1559	-0.5936	0.7488	-0.0605	-0.1004	0.9835	1.457	0.1568	0.5108	1.3013	2.4108	0.4693	-0.0262	-0.3492	-0.1424	0.0687	0.5954	0.6401	-0.2208	-0.0854	-0.4236	0.3396	-0.3473	-0.0248	0.1676	0.9618	-0.1563	-0.6912
O75940	SMNDC1	Oncology_II	-0.2011	0.0176	-0.3491	-0.3986	-0.4106	-0.224	-1.2896	0.2749	-0.141	-0.7046	-0.4936	-0.3136	-0.1055	0.016	0.5134	-0.5073	-0.3642	-1.0041	2.4211	-0.2668	-0.8973	2.5436	-0.3071	-0.1724	0.0914	0.6673	0.3437	0.5503	1.3309	1.9743	2.1607	0.1397	-0.9607	0.6953	-0.835	5.3338	1.2676	-0.4962	-1.0157	-1.2085	0.9099	-0.3264	0.4941	1.2607	2.897	0.1193	-0.1382
O76036	NCR1	Inflammation	0.1735	-0.1803	-0.3038	0.2617	0.5989	0.6461	-0.0086	-0.1505	-0.3899	-0.4472	-0.0669	0.6248	0.5749	0.1178	-0.3275	-0.0703	-0.1389	-0.2825	0.5214	-0.357	-0.1165	0.4046	0.1243	-0.7428	0.4413	1.6369	0.393	0.3109	0.3482	2.1657	0.6238	1.1352	-0.6739	0.678	0.1704	0.2324	0.4452	-0.0124	-0.7816	-0.5634	-0.2809	-0.0682	0.6266	0.3809	0.3326	-0.0734	-0.2638
O76038	SCGN	Inflammation	-0.5782	-0.6507	0.4204	0.7271	0.6002	0.2699	-0.1662	-0.7903	0.9678	-0.0486	0.5468	-0.0386	0.4419	-0.9289	-0.2765	-0.0899	0.2968	-0.6187	-1.0205	-0.8227	-1.3419	-1.4595	-0.5587	0.1236	0.6742	-0.3113	-0.4562	-0.063	0.0401	1.4113	-0.3409	0.4487	-0.9211	0.0047	0.2671	6.2556	0.4666	-0.7136	0.5983	0.7897	0.1539	-0.9231	-0.0731	0.2888	0.0298	1.4435	-0.3833
O76039	CDKL5	Neurology_II	0.5212	-0.2901	0.6814	1.4748	-0.4937	0.3695	-0.6652	0.246	-1.4424	-0.2281	-0.766	-1.2987	-0.1959	-0.717	0.2677	0.2027	0.2674	-0.4513	0.5208	0.2298	0.6959	3.0156	-0.1046	-0.1663	0.8309	-0.6363	3.1409	1.9892	-0.3602	0.7084	0.0544	-0.059	-0.358	-0.5161	-0.1266	-1.0662	0.2091	0.3396	-0.8409	-1.3752	-0.0668	-1.0115	-0.5403	0.6479	1.2843	-0.5826	-0.4384
O76061	STC2	Neurology	-0.5113	0.2649	0.4415	-0.2039	0.2774	0.2537	-0.4066	-0.031	-0.0839	-0.2864	0.0281	-0.4874	-0.2644	0.2536	-0.1831	0.1551	-0.378	-0.4603	-0.2917	0.1576	-1.5262	-0.0339	0.0467	-0.3912	0.409	0.2191	0.414	0.0639	0.7956	0.4886	-0.4676	0.8046	0.0938	-0.2527	-0.1545	2.2283	0.1655	-0.6734	0.203	-0.7112	-0.0052	-0.236	-0.8455	0.3948	0.4455	0.0846	0.1256
O76070	SNCG	Neurology	-1.1983	0.9975	0.8182	-0.3013	-0.2026	0.0886	0.5151	0.0335	-0.5027	0.9312	-0.6182	0.6158	-1.5814	1.326	-0.0435	-0.3331	-1.2721	-1.9955	1.5841	-1.5473	-0.2892	1.0453	0.0174	-0.675	0.5888	2.6337	0.8482	1.3234	1.0724	4.1697	0.7751	0.3857	0.3249	-0.0148	0.9473	2.8221	0.3733	0.0659	-0.0723	-1.3531	-1.3615	-0.1466	0.095	-0.3563	-0.0262	-0.3272	-0.5506
O76074	PDE5A	Inflammation_II	1.6907	0.8256	-1.0026	1.286	1.5306	1.5274	-0.8893	1.1895	0.1741	-0.2903	-0.4166	1.0405	0.5084	-0.5615	-0.1372	-1.5917	-0.8395	-0.5111	0.2086	-0.5951	-1.2504	0.1818	-0.1252	-0.2509	-0.6797	0.5758	-0.1316	0.1994	0.8193	-0.3637	1.0934	-0.922	0.4768	-0.0448	2.5954	2.1572	0.5407	4.0774	-0.5931	0.3836	0.5773	-0.0922	-0.107	-0.7021	1.8237	-0.4237	-1.3298
O76076	CCN5	Neurology	-0.78	1.0228	0.4638	0.1022	0.1659	0.0297	-0.3616	0.2581	-0.1338	-0.909	0.0046	0.5227	-0.2329	0.3573	-0.0056	-0.1946	-0.2642	-1.4734	0.7717	-0.2439	-0.4865	0.4735	-0.3817	-1.8359	0.7818	0.9391	0.5682	0.3372	1.2613	1.646	-0.095	-1.3467	-0.4113	-0.6688	-0.1962	0.1349	0.5214	0.3085	-0.4889	-0.2644	-0.3294	-0.5061	0.1433	-1.1413	1.4034	0.3735	-1.1199
O76096	CST7	Inflammation	-1.7133	-1.0542	-0.5859	0.7929	-0.8134	-0.4105	-0.3752	1.0251	0.5295	-1.7375	2.9362	0.7639	-0.4987	-0.0566	1.2276	-0.3989	-0.1747	-0.5818	2.1472	1.1534	-1.0118	1.3889	0.2618	0.2929	-0.43	0.3085	1.005	0.3033	0.1796	0.6445	-0.3038	0.2339	-0.3138	-0.7928	0.4339	-0.5073	1.3665	-0.7494	-0.4724	-1.74	1.2268	-0.2439	-0.3225	1.3368	0.9354	-0.5734	-0.368
O77932	DXO	Neurology_II	1.0274	-0.1207	-0.3208	0.5369	-0.0752	1.0564	-0.8892	-0.3719	0.3461	-0.0303	-0.4556	-0.1153	-0.4958	-0.53	0.365	-0.5491	0.0014	-0.4923	1.481	-0.3337	-0.2105	0.1783	-0.3584	-0.1317	-0.0014	-0.1773	-0.4069	0.0689	0.4928	1.2282	0.6773	-0.2247	-0.4897	-0.2271	-0.1302	4.4926	0.6815	1.4962	0.4341	-0.6291	0.6688	-0.074	0.7936	-0.2563	1.3997	-0.2145	-0.3683
O94760	DDAH1	Oncology	-0.2037	-0.1263	0.5139	0.0369	0.0311	0.8441	-0.5837	-0.4256	0.0435	-0.2204	-0.139	0.5763	-0.3997	-0.1444	0.2261	-0.1348	-0.335	-0.6452	-0.0874	-0.4411	-0.4785	-0.4093	-0.4644	0.2527	0.6527	0.1674	0.0925	-0.8444	0.6701	1.1223	0.0573	0.3875	-0.0866	-0.4348	-0.5165	3.5077	0.8512	0.0569	-0.38	-0.7828	0.2436	0.0077	-0.1962	-0.4125	-0.1163	0.1204	-0.7541
O94766	B3GAT3	Cardiometabolic_II	0.4152	-0.0959	0.417	0.0262	0.3621	-0.2886	-0.0156	-0.6105	0.5639	-0.1404	-0.6191	0.6088	-0.4462	0.024	0.1915	0.0387	0.1421	0.0771	0.2285	-0.0628	-0.0544	0.185	-0.628	-0.2777	0.4646	0.5381	-0.2328	1.2298	1.1437	0.9922	-0.7125	0.2148	0.105	0.5897	-0.1487	0.6883	-0.0027	0.0027	-0.2416	0.095	-0.4526	-0.1306	-0.4376	0.3918	0.2143	-1.2035	0.2332
O94779	CNTN5	Neurology	-0.1565	0.7956	0.81	1.0203	0.964	-0.4658	1.6056	-0.7199	-0.2108	0.0219	0.4913	-0.5152	-0.1325	1.1158	-0.7192	-0.5715	-0.0855	-0.6765	0.0606	-0.5098	0.0678	-0.5302	-0.9797	-0.0136	0.5456	-1.0644	-0.2218	-0.2022	1.0835	-0.6874	0.0496	-0.0893	0.8882	-0.4059	-1.0421	-0.08	0.0116	0.1122	0.463	0.6805	-0.5961	-0.6058	0.6331	-0.7049	-0.2472	0.0437	-0.8549
O94813	SLIT2	Neurology	0.909	-0.541	0.0739	-0.2599	0.3373	-0.6269	-1.0216	0.4192	-0.3811	-0.0542	-0.2723	0.0019	-1.4323	-0.0569	-0.261	-0.539	0.0083	-0.0019	0.1504	-0.5822	0.034	3.3893	0.1171	-1.06	0.6534	0.3585	0.4443	0.2502	0.2148	-0.2768	-0.3562	-0.0388	-0.2378	-0.2285	-0.3798	1.6843	0.2856	-0.1171	1.5224	-1.392	0.3634	-0.7851	0.0317	0.837	1.38	-0.2671	0.372
O94830	DDHD2	Neurology_II	0.3851	0.0894	0.272	0.5801	-0.1129	0.7104	-0.5684	-0.4713	-0.1944	-0.1034	-0.1854	0.3285	-0.1825	-0.704	-0.029	-0.3175	-0.431	-0.5918	1.2993	-0.1861	-0.285	-0.5602	-0.4674	-0.3913	-0.6368	-0.4253	0.7152	-0.1857	1.6771	0.3136	0.068	-0.2956	-0.1557	0.0874	0.2126	3.5385	0.9648	1.8278	-0.6063	-0.4817	-0.0392	-0.5656	-0.165	-0.7073	1.2737	0.0068	0.1878
O94856	NFASC	Inflammation	-0.1953	0.2923	0.6886	0.4195	0.2812	0.2938	-0.188	-0.4172	0.4383	0.3537	-0.0303	0.1216	-0.5225	-0.2539	-0.4005	0.2421	-0.2814	-0.2386	-0.4924	0.1859	-0.1408	-0.3862	0.0622	0.0882	0.2477	-0.3109	-0.286	-0.2373	0.9723	0.4576	-0.2784	-0.2393	-0.2032	-0.0822	0.3855	1.3995	0.5101	-0.0732	1.1428	0.0905	0.2546	-0.3802	-0.0079	-0.3996	0.7531	-0.252	-0.422
O94903	PLPBP	Cardiometabolic	0.7598	0.4005	-0.1449	0.5019	-0.0445	1.1052	-1.7016	0.1405	0.1726	-0.2868	-0.1603	-0.455	-0.8533	-0.7024	0.5424	0.4245	-0.2769	-0.5156	2.5352	0.1874	-0.5918	-0.4335	-0.4227	0.0324	0.2161	-0.1806	-0.4545	-0.3493	0.885	1.6045	0.9847	-0.1202	-0.6905	0.0123	0.2172	0.7042	0.9413	1.4841	-0.9243	-1.0262	1.0703	-0.8163	0.8364	-0.6197	0.2266	0.3442	-0.7788
O94907	DKK1	Neurology	0.2306	0.7613	-0.2857	0.1869	-0.2466	-0.6131	-0.3535	0.3161	-0.1584	-0.9409	-0.6977	0.5911	-0.6001	1.1883	0.0641	-0.6461	-0.4693	-1.2868	1.8285	-0.7315	-0.0443	1.7198	-0.6213	-0.4942	0.5751	0.7508	0.348	-0.3413	0.4012	1.2947	-0.5499	-1.0696	-0.4936	-0.3537	2.0683	-0.1478	-0.1601	0.8066	-0.0025	0.2339	1.2811	-0.6128	0.1356	-0.4824	0.4442	-0.1327	-0.73
O94916	NFAT5	Inflammation_II	0.1631	0.2524	-0.3746	-0.9574	0.4732	-0.2162	0.0932	1.3124	-0.7773	-0.3806	0.0428	0.4517	0.686	-0.5736	0.6955	-0.775	-0.3422	-1.6128	1.6212	-1.6901	-2.4402	0.8155	-0.4697	0.7835	-0.6026	-1.4188	-0.2348	-0.3248	1.4805	-0.0683	1.1042	0.7813	-0.9591	-0.2543	1.2994	-0.1621	-0.0242	3.0093	0.0242	-0.9238	-0.67	-0.5148	-0.701	0.4638	2.1428	-0.4984	0.0628
O94979	SEC31A	Cardiometabolic_II	2.0466	-0.1688	-0.248	1.0317	1.325	1.5644	-0.4682	0.3307	0.0652	-0.2447	-0.3542	-0.0652	-0.0919	-1.3858	-0.0075	-0.3961	0.0075	-0.5654	1.1902	-0.0869	-0.8421	-0.5188	-0.1758	0.2125	0.073	-0.0541	0.242	-0.1637	0.3464	0.1546	0.2078	0.8142	0.371	-0.0393	1.8412	2.0065	0.5265	3.158	-1.1414	1.2246	0.3727	-0.4579	0.1315	-0.1976	0.5584	-0.1849	-0.3722
O94986	CEP152	Oncology_II	-0.388	0.0065	0.0102	-0.1861	0.7477	0.1606	-0.7028	-0.5019	0.074	-0.8874	-0.5836	-0.2069	0.1233	-0.8929	0.0214	-0.5868	-0.1576	0.2179	0.0997	-0.1655	-0.1582	0.322	0.0519	-0.4481	0.498	-0.6358	0.0366	-0.1173	0.3145	0.2236	0.4747	-0.4851	-0.3232	-0.8266	-0.3109	1.8143	0.5036	-0.1426	-0.0486	-0.5072	0.1777	-1.2443	-0.2784	0.1149	0.5284	0.1193	0.3988
O94988	FAM13A	Oncology_II	-0.2169	0.219	-0.8218	-0.0661	-0.4471	0.5597	-0.9738	-0.1799	0.2671	-0.3804	-0.4581	-0.1478	-0.4067	-0.4648	0.3426	0.0699	-0.7939	-0.7698	1.931	-0.1001	-0.2432	0.3851	-0.2058	-0.4295	0.2466	0.2508	0.5899	0.1279	0.7504	0.6518	0.4361	-0.2025	-0.4345	-0.2325	0.74	2.9539	0.6054	1.8199	0.0033	-1.4554	0.7547	-0.6341	-0.0033	-0.5742	1.5379	0.1157	-0.6812
O94992	HEXIM1	Inflammation	0.1006	0.7078	-0.9173	0.0654	-0.2918	0.548	-1.0667	0.0935	0.0285	-0.4411	-0.2806	0.2085	-0.8561	-0.1603	0.0078	-0.7266	-1.0552	-0.6631	2.2304	-0.997	-1.6458	0.9012	-0.4012	0.0214	-0.0066	-0.0114	-0.0928	0.3552	0.8895	1.2618	0.3334	0.002	-0.2376	-0.1907	0.2427	1.9818	1.1074	1.8858	-1.1484	-0.717	0.3933	0.8244	-0.002	0.0475	1.1723	-0.415	-0.4177
O95049	TJP3	Neurology_II	0.302	-0.871	0.3461	-0.5038	0.5886	-0.7352	-0.0388	0.0828	0.2061	-0.0848	-0.1379	0.1964	-0.3867	0.0925	-0.0603	0.2387	1.1329	-0.0723	1.5735	-1.0984	0.6382	-0.7633	0.5874	-0.2744	-0.9859	-0.0162	-0.78	5.8482	0.0003	0.9619	0.006	-0.0915	0.5875	0.2679	0.1806	-0.1471	-0.6159	-0.0537	0.8013	-0.7247	-0.2709	2.8284	0.3729	-0.4302	1.6471	0.8408	1.5047
O95157	NXPH3	Inflammation_II	-0.2667	0.2895	0.3276	0.3067	0.7588	0.1238	0.1671	0.1696	-0.5043	-0.034	-0.4354	0.1204	-0.3302	-0.4298	-0.6415	-0.0743	-0.0079	-0.8975	-0.7084	-0.1515	-0.0657	-0.294	0.2559	-0.5496	0.2094	0.5527	-1.0618	-0.2849	1.4086	1.3649	0.0079	-0.3378	-0.1407	0.8264	-0.5793	1.1447	0.1602	-0.3713	0.2247	-0.1022	-0.5787	-0.455	-0.2188	-0.4957	-0.3421	0.4762	0.176
O95166	GABARAP	Oncology_II	-0.7016	-0.3758	-0.6355	0.4837	0.1714	-0.0481	0.299	-0.7071	-1.1229	1.1002	-0.1196	-0.4878	-0.6478	-0.4817	-0.2529	-0.3148	-0.5058	-0.5417	0.9718	-0.0985	0.2789	0.4563	-0.0836	-0.1114	0.2769	1.2429	-0.2035	-0.5696	0.258	2.1844	0.2607	0.2914	0.4392	0.7766	0.246	-0.0488	0.0783	0.5991	0.1094	-0.5087	0.0726	0.0437	0.1717	-0.0767	-0.4976	0.197	0.164
O95180	CACNA1H	Cardiometabolic_II	2.7098	0.4057	-0.2837	0.3253	0.8406	-0.9802	-0.1043	-0.0958	-0.199	-0.2144	-0.3022	0.1719	0.6817	0.3059	0.0043	-0.3914	-1.0783	0.2571	0.0659	-0.1718	0.1931	-0.4267	0.8517	0.5299	-0.6812	0.1731	0.4753	0.4258	0.3195	0.334	-0.0247	0.9694	-0.299	0.5397	-0.0857	0.4147	0.839	-0.0426	0.2538	-0.3933	-1.0312	-0.1351	-0.3101	0.8256	0.1046	0.0054	-0.3452
O95183	VAMP5	Cardiometabolic	0.2886	0.3061	0.2773	-0.2219	-0.2668	0.1577	-0.2565	0.3524	-0.4141	3.1354	-0.6651	0.0729	-0.0028	-0.0712	-0.1785	-0.4653	1.8751	-0.2889	-0.3281	-0.0255	0.2251	0.1239	0.9836	-0.4704	0.731	0.6284	0.2283	-0.0852	0.6083	0.9298	-0.1882	0.7859	-0.4822	-0.6535	-0.081	0.8059	0.0791	0.4877	0.057	-0.8439	0.2279	-0.3837	0.5012	-0.0071	0.2001	-0.7993	0.2649
O95196	CSPG5	Neurology_II	-0.3592	-0.2303	-1.3618	0.9863	0.3923	-0.0373	-0.5644	-0.0824	-0.3587	-0.3755	0.2623	-0.2834	-1.0143	-0.3646	-0.3652	0.3436	-0.4649	-0.8023	0.6733	-0.6085	0.1152	-0.7496	-0.3552	1.1439	0.4001	1.6391	0.0334	-0.0216	-0.3673	0.9027	0.0014	0.5975	-0.4839	-0.3793	0.1898	0.1868	0.3391	-0.5992	-0.1222	-0.6811	-0.6668	-0.0144	-0.8755	-0.3443	0.0698	0.0211	-0.7283
O95202	LETM1	Neurology_II	0.0043	-0.2374	-0.0244	-0.618	-0.0571	0.04	-1.1694	0.4684	0.3391	0.2937	-0.6673	0.4498	-0.2682	0.9624	-0.3903	-0.1297	-0.4018	-0.5064	2.7661	-1.1392	-0.8404	2.6736	-0.5881	0.5525	1.1893	0.8912	1.5153	0.7067	1.3093	2.4066	0.2623	0.8729	-1.0637	-0.5065	-0.0043	4.8051	0.0101	0.0161	-0.9074	-0.6127	-1.085	-0.1154	-0.154	1.299	2.0153	-0.0864	-0.1968
O95256	IL18RAP	Neurology	-0.1724	5.127	3.3902	1.1407	1.4541	-1.7719	4.4182	0.497	-1.1926	-0.3133	2.524	-2.2488	2.6247	0.9758	0.9463	-1.9112	0.5071	1.7177	-0.8947	-0.5203	-0.8617	4.9578	-0.2703	-0.9858	0.0765	0.8727	-0.9549	0.7711	-0.4837	-1.0862	1.6026	-0.5533	1.5739	-0.6899	-0.5658	-1.1154	0.4439	-0.1134	-1.4813	0.2784	0.9363	0.2646	1.5703	0.2571	0.4545	-0.5331	-0.9836
O95274	LYPD3	Oncology	0.0933	1.1592	0.2786	-0.4259	0.6326	-0.0953	-0.0792	0.3356	-0.0023	0.9337	-0.4489	-0.0018	0.3161	0.2815	-0.0266	-0.1851	-0.1531	-0.4331	1.9792	0.5879	-0.1133	2.1878	-0.66	-0.1629	0.0481	-0.5499	1.0863	2.789	0.2975	-0.2739	-0.6275	1.1638	0.5278	-0.5834	-0.1901	0.2896	-0.1035	-0.3357	0.6788	-0.626	-0.4259	0.8684	-0.6811	-0.0462	0.1423	-0.095	-0.4046
O95295	SNAPIN	Neurology_II	0.2485	0.2891	0.7162	0.3557	-0.8348	-0.6258	0.4542	-1.3605	-0.7191	-0.1879	-0.7271	0.0102	-0.7155	-0.1695	-0.3953	-0.2702	-0.0308	-0.295	0.3543	-0.168	-0.1544	-1.2538	-0.6151	-1.3319	-0.0393	-0.3064	0.5967	0.1061	0.8258	0.5511	-0.0908	-0.72	0.2552	-0.2556	0.2995	2.9688	1.6024	1.8972	-0.5134	-1.2294	-0.402	0.0952	-0.3864	-0.0102	0.8103	-0.4201	0.3681
O95372	LYPLA2	Neurology_II	-0.5583	-0.1604	0.3676	-1.8631	0.1904	-0.5162	0.2978	5.6797	-0.5511	0.435	0.609	-1.7983	-1.173	-0.7959	2.3764	-0.5249	-0.9232	1.3423	1.4278	0.2933	1.3955	-0.2722	0.5994	-0.7886	0.3847	0.0327	-1.1516	-0.1428	-0.8465	-1.058	1.4376	0.361	0.2522	-1.2975	-0.1764	-0.581	1.5005	3.8162	2.0413	-0.0613	-0.5947	0.041	-0.1454	-0.0327	0.1934	-1.3641	3.1055
O95379	TNFAIP8	Inflammation	-0.1406	0.5757	0.5352	-0.3968	0.2788	0.134	-0.6575	0.1813	0.2084	-0.8243	-0.0536	0.4632	-0.1915	-0.5482	1.0436	0.0783	-0.3089	-0.0532	0.8472	0.8497	-0.2901	-0.8166	0.7878	-1.1658	0.2397	0.1206	0.6492	-0.0183	0.1309	0.1154	0.8375	-0.4072	-0.3474	-0.1145	-0.8743	1.1533	0.6549	0.0473	0.0179	-1.0991	0.4535	-0.8563	1.2142	1.1979	0.4182	-0.4181	0.2347
O95388	CCN4	Oncology	-0.3379	0.3856	0.3628	0.0624	0.1373	0.0177	-0.1226	-0.0668	-0.2905	0.2873	-0.3733	0.3896	0.4467	0.1006	-0.0597	-0.0698	-0.1668	-1.246	0.5649	-0.053	-0.3552	1.4315	-0.0261	-0.1388	0.0889	1.2727	0.3721	0.9553	0.656	1.7712	-0.3614	0.0857	-0.5826	0.4931	-0.1449	0.6467	0.2855	-0.374	-0.1242	-0.2757	-0.2104	-0.2863	-0.384	-0.2481	1.5768	-0.0618	-0.0392
O95393	BMP10	Inflammation_II	-0.3943	0.2395	0.7256	0.0665	1.1976	-0.2271	-0.1891	1.0163	-0.5712	1.0278	-0.2575	0.4167	-0.359	-0.4088	-0.8139	0.0262	0.0519	-0.663	-0.2854	0.0048	0.0437	-0.3489	1.2175	-0.5761	0.5693	0.3423	-0.6494	-0.3797	0.7259	0.6422	0.2104	-0.1173	-0.3583	-0.1714	-0.6887	-0.4893	0.181	-0.126	0.1774	-0.5266	-0.3045	-0.6022	-0.3484	-0.7372	-0.9838	0.3987	-0.0356
O95407	TNFRSF6B	Neurology	-1.0314	0.4998	-0.4317	0.1231	0.4362	-0.0158	-0.7735	1.1446	-0.0975	0.4134	-0.888	0.7237	0.7721	0.1532	0.2984	-0.3824	-0.2848	-0.6309	1.7963	0.1465	-0.7162	3.2363	-0.0011	-0.0776	0.2696	1.5659	-0.3857	1.6356	0.4767	1.0042	-0.0649	0.7653	-0.2359	-0.2984	-0.9528	1.0657	0.7498	-0.7268	-0.8974	-1.2511	-0.2021	-0.0439	-0.4619	0.3228	1.9313	0.8376	-0.118
O95429	BAG4	Inflammation_II	-0.0353	-0.6528	0.1741	0.1534	-0.4444	-0.3328	-0.84	0.1283	-0.457	0.5057	-0.4862	-0.3193	0.0574	-0.231	-0.0003	-0.16	-0.0614	-0.7192	1.8646	-0.4825	-0.9446	0.7049	0.1977	-0.1917	0.282	0.6774	0.6184	0.1884	2.4462	1.6723	1.3391	-0.1997	-0.6856	0.1771	-0.2352	2.7444	0.4842	0.4141	-0.5899	-0.7961	-0.2213	-0.6959	-0.0802	0.4195	2.2474	0.0669	0.2062
O95433	AHSA1	Oncology_II	0.0412	-0.0159	-0.8557	-0.0465	-0.206	0.5459	-0.7299	-0.2218	-0.1747	1.4399	1.7036	-0.0729	1.1111	1.5381	-0.0797	0.3479	-0.2666	-0.5817	1.5793	-0.5859	-0.1926	0.2058	-0.2123	0.082	0.2202	-0.5392	0.0868	-0.3595	-0.0677	0.7626	0.006	0.6873	-0.8355	-0.3555	0.1718	0.366	-0.1193	0.6472	0.3606	-1.0183	0.111	-0.973	0.0182	-0.5987	-0.006	0.3243	0.1471
O95445	APOM	Cardiometabolic	-0.1234	1.409	0.0881	-0.4263	0.8451	-0.2774	0.519	-0.0758	-0.0363	0.2961	-0.1225	0.9997	-0.549	0.0722	-0.1167	-0.1719	-0.493	-0.577	0.0159	1.1388	0.003	-0.9594	-0.1156	-0.3167	0.1951	-0.9841	-0.0661	0.6105	0.1523	-0.3896	-0.4977	0.8723	0.1279	-0.2213	-0.3996	0.5474	-0.2155	0.201	-0.0922	-0.6134	-0.4395	0.1548	0.525	-0.1136	-0.0083	0.336	0.4076
O95466	FMNL1	Neurology	-0.7592	-1.236	0.2072	0.6494	0.4079	-0.2245	-0.9163	0.5024	-0.5705	-0.3231	-0.0855	-0.001	0.5378	-0.5097	1.8603	-0.4188	0.0078	-0.5756	0.1831	0.4214	-0.7073	-0.1708	-0.7959	-0.0622	0.001	0.1427	0.1533	0.2451	0.8458	0.8983	3.7329	0.0916	-0.8613	-0.6606	-0.7595	0.9244	0.2675	-0.0839	-0.6436	-0.5882	2.2358	-1.0088	0.3146	1.543	0.4116	-0.0989	1.0252
O95467	GNAS	Neurology_II	0.0063	-0.3926	0.3175	0.1712	0.1186	-0.1485	0.5148	-0.5468	-0.5455	-0.5666	0.1415	0.0398	-0.5563	-0.6973	-0.2395	0.1876	-0.2009	-0.2958	2.7695	-0.4467	-1.1381	-0.3138	-0.4017	-0.2919	0.2944	0.1996	0.0025	-0.4366	-0.4256	2.1578	-0.4682	0.0664	0.1001	-0.351	-0.2514	-0.3559	-0.3653	-0.2825	0.4937	0.0458	-0.6778	-0.1477	-0.4784	-0.0954	0.3671	1.2784	0.2295
O95497	VNN1	Inflammation_II	0.0507	1.7829	0.1416	-0.0938	-0.4087	-0.8553	-0.2214	-1.0654	0.6971	-0.2114	0.654	0.378	0.3006	-0.362	0.0741	0.5045	-1.5843	0.4975	-0.6916	1.4806	0.8762	-0.9796	0.4824	-1.1944	-0.4816	-0.8908	1.5036	-1.4146	1.5756	-1.186	0.7861	-0.3765	0.5851	-0.3364	1.1465	1.8867	0.2301	0.1131	0.3326	-1.0167	-0.8028	0.2408	1.1466	-0.1354	-0.9752	-0.4041	0.7472
O95498	VNN2	Oncology	-1.079	-0.2102	0.1488	0.0624	0.3345	-0.2406	-0.9595	0.4785	-0.6097	0.2564	0.1194	-0.2203	-0.2699	0.0215	-0.0256	-0.7258	0.123	0.1406	0.409	-0.1339	-1.5689	0.3552	-0.5801	0.0656	-0.32	0.0773	0.1348	0.0106	0.3614	0.0046	0.0867	-0.0925	-0.6738	-0.4204	-1.0579	-0.0164	0.1133	-0.3308	-0.0283	-1.3432	0.8051	0.0715	0.1107	-0.4174	0.7781	-0.3107	0.4426
O95502	NPTXR	Cardiometabolic	-0.3244	0.0015	0.1441	0.0215	0.6432	0.1517	0.1271	-0.2499	-0.2366	-0.7451	0.4556	0.3394	-0.5579	2.1083	-0.1858	-0.298	-0.2415	-0.6982	0.6901	0.242	-0.205	1.4535	-0.1749	-0.4807	0.5234	0.114	-0.5441	-0.0617	0.7529	1.0223	-0.3122	0.0242	-0.0952	-0.0723	-0.036	1.8391	0.0103	-0.3951	0.4122	0.2665	-0.1026	0.5555	-0.289	-0.286	0.4043	0.3562	-0.8651
O95544	NADK	Cardiometabolic	-0.9257	-0.1216	-0.1135	1.461	0.3799	-0.234	-1.3454	-0.0517	0.6098	-0.1719	-0.1263	-0.3431	0.0495	0.0518	0.9475	-0.8152	0.3867	-0.4762	1.4744	0.3437	-0.4019	-0.0101	0.1738	0.3477	1.0725	0.0693	0.9544	0.3799	0.6825	1.1938	2.5755	-0.6411	-0.8403	-0.915	-0.1579	2.5562	1.0818	-0.4362	-0.7523	-0.0064	1.6096	-0.6015	-0.0587	0.3092	0.9332	-0.4062	0.4351
O95630	STAMBP	Neurology	0.4525	-0.0746	-0.3926	0.268	-0.0315	1.0666	-1.2658	0.0328	0.1773	-0.5459	-0.5532	-0.028	-0.6778	-0.3659	0.5387	0.1457	-0.0028	-0.4699	2.6536	0.0592	-0.8147	-0.5027	-0.398	0.0742	0.1531	0.2546	-0.5382	-0.2065	-0.1711	1.5679	0.3286	0.2	-0.2998	-0.1779	-0.2064	1.3493	-0.049	1.5964	-0.7991	-0.7997	1.0008	-0.3209	0.4457	-0.2445	0.0028	0.6736	-0.3538
O95633	FSTL3	Inflammation	-0.9307	0.5194	0.325	-0.1178	0.4091	0.181	-0.3818	0.0334	-0.644	0.1071	-0.3475	0.2597	0.1535	0.4192	-0.1257	-0.3478	-0.57	-1.2285	0.1875	0.0023	-0.8552	1.0289	0.3984	-1.1429	0.5331	1.3173	0.5025	0.4149	1.1494	1.9661	0.4523	0.494	-0.6141	0.1153	-0.0023	0.6223	0.2235	-0.4111	-0.1645	-0.2423	-0.5592	-0.02	-0.0841	-0.2953	1.1728	-0.1286	-0.9819
O95644	NFATC1	Inflammation	-0.0146	-0.1327	0.4419	0.2262	-0.0243	-0.2039	-0.3184	-0.0076	0.0095	-0.3393	-0.0981	0.2697	-0.2317	-0.2285	-0.5405	-0.7156	-0.667	-0.6725	0.3886	-0.3828	-0.6546	0.5024	-0.291	-0.3784	0.23	0.5942	-0.1483	0.2994	0.8147	1.4462	0.9759	-0.3299	0.2567	1.1551	0.6223	0.0853	0.3743	1.6915	-0.7721	-0.8898	0.5526	-1.1061	0.1117	-0.4907	0.7492	0.0076	-0.2324
O95670	ATP6V1G2	Cardiometabolic_II	0.61	0.0495	-0.0436	-1.6968	-0.0952	0.4678	0.3871	-0.862	-0.1644	-1.3984	-2.013	0.2905	-5.8971	-1.5513	0.6026	-0.5295	-0.7358	4.871	1.9881	-0.8746	-0.6049	0.199	0.8205	0.5099	-1.6623	1.3125	0.0931	0.4392	0.0571	-1.2328	-0.3126	-0.89	-1.6536	0.1276	1.296	5.2679	1.2092	1.4827	2.9652	0.335	-0.8079	0.1137	0.995	1.2384	0.7316	-0.314	0.3234
O95684	CEP43	Cardiometabolic	1.5688	-0.3377	-1.0386	0.1526	1.1543	0.644	-0.9143	0.0853	0.0936	-0.0621	-0.6407	-0.2683	-0.6722	-0.3355	0.2903	0.0001	-0.7965	-0.6509	1.5975	-0.8539	-0.9345	-0.8326	0.3816	-0.7432	-0.6037	-0.781	0.5965	-0.3218	-0.0001	0.7301	0.4119	0.2753	0.0185	-0.5089	1.2649	2.0657	0.5087	2.4261	-0.0932	-0.4249	0.5103	-0.0903	0.4242	-1.3251	0.3306	0.135	-0.7942
O95696	BRD1	Oncology_II	5.994	1.4878	0.071	-0.3513	0.0495	-0.0678	0.1715	-0.7241	-1.0346	-1.7502	-0.678	-0.5896	-1.0985	-0.4936	-0.3574	-0.4025	-0.6503	-0.8041	0.1335	0.9275	0.2717	0.3238	-0.7308	-0.6563	0.4643	0.01	0.2007	0.215	-0.3864	-0.3277	-0.8301	1.1525	-0.5251	-0.7861	0.961	-0.4601	-0.0274	-1.0589	1.1005	-0.0962	-0.7846	-0.3336	-0.9401	0.5039	0.8061	-0.5983	-0.01
O95715	CXCL14	Inflammation	0.2812	-0.2618	1.0468	-0.4278	0.3501	-0.1236	-0.0896	0.4345	0.0326	0.0108	0.0167	0.6101	-0.2038	-0.3551	-0.2121	-0.334	0.2164	-0.842	0.287	0.0035	0.1636	-0.2741	-0.2357	-0.5543	0.2451	-0.2659	-0.01	0.3552	0.4978	1.09	-0.4361	0.2604	-0.2044	1.0503	0.6388	-0.3205	0.4571	0.6113	0.4638	0.1311	0.5984	-0.1683	0.106	-0.1687	0.5891	-0.2015	-0.5376
O95721	SNAP29	Oncology	0.8481	1.9545	-1.1847	-0.0199	0.2521	0.7023	-1.2201	0.5924	-0.4285	-0.9042	-0.553	0.7268	0.0885	-0.8903	0.1954	-0.8497	-1.1479	-0.5184	1.399	-0.4674	-1.6466	0.3474	-0.3492	-0.4352	-0.0005	0.1724	0.3924	-0.1909	1.0381	1.0393	0.2814	-1.2498	-0.4723	-0.4434	2.5642	0.6915	0.1911	3.8173	-1.3785	0.2588	0.7554	-0.598	-0.4472	-0.7602	1.4849	-0.6994	-0.7802
O95727	CRTAM	Neurology	-0.9605	0.1794	0.1519	0.1472	0.3313	-0.1232	-0.5187	0.3326	-0.7303	0.0496	-0.7633	-0.4494	0.9107	0.0012	-1.1207	-0.1908	0.0347	-0.4049	0.6555	-0.3226	0.2409	1.563	-0.8157	-1.3775	0.507	0.7711	0.1459	-0.376	1.064	0.0166	0.4934	0.1891	0.1101	1.2209	-0.1732	0.2243	-0.1481	-1.0947	-0.4577	0.2095	-0.3941	0.6687	-0.8211	0	0.5622	0.729	-0.7788
O95750	FGF19	Inflammation	-1.943	0.4728	1.3485	0.9049	0.9193	0.165	-0.8939	1.3909	1.1686	-1.2563	0.5428	-1.1506	-0.2619	0.2331	-1.6903	-0.4274	-0.8349	-1.0966	-0.1117	-2.6662	-1.4514	-0.9876	-2.4616	0.846	0.2394	0.2021	-0.3786	-0.9758	-0.1678	1.8038	-0.4521	-1.1951	-0.5144	0.2045	-0.0174	2.0392	-0.1143	-0.3847	-1.4381	0.1577	-1.3225	-0.7289	-0.5774	0.1953	0.9738	0.3452	0.9946
O95760	IL33	Inflammation	0.415	-0.579	0.0811	1.6608	-0.4369	0.3197	-0.1894	-0.1765	-0.8103	-0.1872	0.0916	0.6725	-0.2244	0.0485	0.6755	0.0204	-1.489	-1.2011	1.0443	0.0909	0.5363	0.6718	-0.3624	0.618	-0.2084	0.8584	0.6619	-0.0852	-0.15	0.5114	0.141	0.0185	-0.2328	0.097	0.2265	0.1901	0.1887	-0.4066	1.6359	-0.6886	0.3608	-0.5211	-1.2408	0.142	0.7336	-0.2546	-0.3757
O95777	LSM8	Oncology_II	1.4814	0.3466	0.4131	0.29	0.4649	1.1879	-0.3881	1.9428	-0.2425	-0.4771	-0.4783	-0.9175	-0.3102	-0.0629	2.0746	0.0946	0.579	0.2078	-0.3162	0.3626	0.1845	0.2415	0.287	0.4923	-1.0895	0.3269	-0.8794	0.3199	0.1715	-0.2832	-0.2158	5.6459	-0.0969	-0.5448	1.2335	0.3062	1.265	-0.2652	-0.1189	0.039	1.6357	-0.263	-0.9714	1.4453	1.5144	-0.1772	0.1114
O95786	DDX58	Oncology	0.286	-0.1842	-0.0863	0.6514	0.1358	1.0184	-0.8108	-0.1148	0.2567	-0.1284	0.5349	-0.1756	0.3062	-0.7028	0.2847	-0.5039	-0.4714	0.5593	1.5377	-0.2619	-0.6361	-0.4374	-0.3325	-0.3698	0.1332	-0.1543	-0.3697	-0.0385	0.0891	1.2381	3.782	-0.2419	0.2899	0.5522	-0.5649	1.0326	1.2481	0.9633	0.2365	-0.0254	0.8739	-0.8685	0.4675	-0.6107	-0.3714	-0.5811	-0.2578
O95793	STAU1	Oncology_II	0.6034	0.3405	-0.7114	-0.363	0.1006	-0.5579	-0.5959	-0.4142	-0.7273	-0.0821	-0.6864	0.805	0.0857	-0.4962	0.1643	-0.0831	-0.0586	1.3019	0.3199	-0.1592	-0.2192	0.0336	1.3849	1.1936	-0.4984	0.612	-0.0178	0.2017	0.1847	0.2903	-0.0755	-0.1945	-0.2546	-0.4422	0.5595	0.7563	-0.0457	0.6321	-0.2475	-0.6167	-0.0959	-0.1752	0.5301	-0.1616	0.4905	-0.7454	-0.5485
O95817	BAG3	Neurology	-0.0551	0.2808	0.0683	0.4396	0.9379	0.1663	-0.2193	-0.258	-0.8037	0.3724	-0.0389	-0.3932	-0.0041	-0.2202	0.3407	0.2975	0.2504	0.3339	-0.2886	-0.6556	-1.1289	-0.2852	-0.3665	-0.5832	0.5759	0.1037	-0.0801	-0.1705	0.8527	1.3984	0.3556	0.596	0.3476	0.0026	-0.6713	0.6898	0.4568	-0.0685	-0.415	0.1544	-0.2678	-1.0052	-0.6759	0.1782	-0.1416	0.0905	0.6955
O95825	CRYZL1	Cardiometabolic_II	1.3829	0.1957	-0.1494	0.8897	-0.0188	1.0021	-1.5559	0.052	0.3014	-0.7656	-0.5338	-0.0415	-0.4242	-0.6942	0.3722	0.0188	-0.3209	-0.3683	2.0194	-0.1768	-0.8109	-0.2955	-0.5132	0.1319	-0.4197	0.1302	-0.5061	-0.2868	0.9923	1.1826	0.6236	-0.5779	-0.2473	-0.0255	0.9678	3.3387	1.3211	2.8722	-0.8067	-0.8618	1.2379	-1.8761	0.551	-0.5044	0.7944	-0.5132	-0.4793
O95831	AIFM1	Oncology	0.2475	0.9215	0.2233	-0.0384	-1.5896	-0.3219	-0.5968	-0.0481	-0.5177	0.1311	-0.2387	-0.0923	-0.2553	-0.6112	-0.3268	-0.2464	-0.4762	-0.6332	-0.1561	-0.3794	-0.3678	-0.6894	-1.0093	0.286	0.0509	-0.6259	0.1334	-0.604	0.3271	0.4441	-0.5031	0.3389	-0.1549	0.1259	1.476	3.274	0.1675	3.4271	-0.002	0.5354	-0.2694	-0.8697	0.1438	0.2352	1.2142	-1.9062	0.463
O95835	LATS1	Inflammation_II	1.5578	-0.053	-0.3333	1.1953	-0.2297	0.3797	-1.8104	-0.308	0.3291	-1.7786	-1.2761	0.868	-0.9256	-1.1219	-0.251	-1.4245	-1.2231	-0.936	1.9292	-0.6928	-1.3976	0.4303	1.2234	-1.2765	0.1108	1.1589	0.1875	1.0972	0.7782	0.4771	0.7702	0.2797	0.1004	-0.0149	1.5006	1.1322	0.1627	2.8409	0.783	-0.5554	0.0149	0.1449	-0.4079	-0.5403	0.7532	-0.3267	-1.543
O95841	ANGPTL1	Cardiometabolic	-0.6107	0.0195	-0.0677	-0.2686	0.3209	-0.2594	-0.1815	0.1069	0.2558	0.3075	-0.3052	0.5629	0.0446	-0.3901	-0.0195	0.0985	-0.264	-0.1717	0.3098	0.6293	0.174	0.1303	0.4728	0.0474	0.0473	-0.132	-0.3105	0.3136	0.54	0.4333	0.1896	0.1414	-0.2867	-0.1405	-0.0263	1.1638	-0.3352	-0.3002	0.2605	-0.1283	0.1072	-0.7905	-0.1261	-0.2957	0.7319	0.312	-0.1982
O95858	TSPAN15	Cardiometabolic_II	0.3034	0.2385	0.1637	-0.2571	-0.532	-0.2925	2.0895	0.1614	-0.6049	-0.3559	-0.1039	-0.7825	-0.0067	-0.5185	0.7883	-0.3459	2.1345	0.3778	0.7037	-0.5448	0.2633	-0.5239	0.5604	0.3229	0.0703	-0.4945	1.4124	0.7029	0.2466	-0.2982	-0.3519	-0.4189	0.0861	-1.905	-0.4521	0.1942	0.2346	-0.1045	-0.2887	-0.977	-0.1691	1.5947	0.4921	0.2223	0.23	0.314	-0.5173
O95866	MPIG6B	Inflammation	1.4045	2.1828	-1.7203	-0.1976	0.1924	-0.4345	-0.8508	2.2136	0.0497	-1.3869	-0.2261	2.1918	0.1267	-1.1018	-0.2843	-1.5478	-1.1611	-1.4586	0.1413	-0.6027	-1.1712	0.4089	-1.0293	-0.121	2.7848	-0.0853	0.387	0.7133	1.9988	-0.4348	-0.0524	-1.271	-0.4699	0.5324	4.5888	0.1958	0.0006	4.0364	-1.9008	1.1644	0.8858	-0.9356	-1.2769	0.0188	2.508	-1.29	-0.0006
O95954	FTCD	Neurology_II	-0.6047	0.9065	1.2461	0.3817	-0.4944	0.2795	-0.1292	0.0946	-0.1632	1.4697	-0.3128	-0.7416	-0.7463	-0.0156	1.4037	0.7678	0.4386	-0.3089	-1.5079	0.9137	0.3164	-0.3314	-0.0793	-0.9799	0.5189	-1.0083	-0.2256	-1.0082	0.2142	0.2143	-0.4231	0.3931	0.4471	-0.0556	-0.4259	2.1265	0.8382	-0.4489	1.5616	-0.2638	-0.8594	-0.1357	0.9124	1.1334	-0.434	-1.3066	0.3453
O95965	ITGBL1	Cardiometabolic_II	-0.3786	0.1378	0.7678	0.1932	0.2084	0.1142	-0.206	-0.2613	-0.026	0.2781	-0.2908	0.1193	-0.5256	0.0104	0.4825	-0.3706	-0.641	-0.5614	-0.1444	-0.0705	-0.3881	-0.3774	0.8758	-0.6895	0.0208	0.4443	0.279	0.7992	1.2885	0.9888	0.7049	-0.7431	-0.0798	-0.6334	-0.0766	0.7314	0.1745	-0.0739	0.3909	-0.4594	-0.3177	0.1732	0.7536	-0.3279	0.9983	0.0706	-0.6729
O95971	CD160	Inflammation	-0.1058	-0.1775	0.1146	0.6421	1.0302	0.9589	0.278	-0.1654	-0.4151	-0.1733	0.2992	0.3478	0.7002	-0.0046	-0.2354	0.4765	0.2388	-0.208	-0.7166	-1.2042	-0.5681	0.941	0.5333	-1.3276	0.4737	1.7354	0.1664	-0.8658	0.6372	2.8006	0.2049	0.2522	-0.0459	1.4264	0.2438	-0.4843	0.1968	-0.5481	-0.1828	0.3024	-0.148	-0.4053	-0.1278	0.2624	0.0388	0.9029	-0.6008
O95980	RECK	Cardiometabolic_II	-0.0421	0.037	0.2569	-0.0677	0.1681	-0.0337	0.0448	-0.3301	0.0787	0.1205	-0.1458	0.0591	-0.0571	-0.0792	-0.1617	-0.0761	-0.0602	-0.2299	-0.1144	0.0879	0.2556	-0.5664	-0.3285	0.0226	0.1379	-0.0883	-0.0599	0.1271	-0.208	0.1325	0.3004	0.0087	0.1287	-0.4624	0.0124	-0.0479	0.1916	-0.1729	0.3706	-0.0629	-0.0678	-0.2102	-0.1811	-0.2763	0.143	0.0931	-0.0885
O95988	TCL1B	Cardiometabolic	-1.8149	-0.3558	0.7053	-0.277	-0.7089	0.6319	1.2146	-0.2016	3.3774	0.4828	0.7513	0.1972	1.3794	-0.0857	0.8907	-0.5884	2.7941	1.8422	0.2258	-0.3129	-0.1465	-0.0027	0.5809	-0.6344	-0.0643	2.5649	-0.4038	0.5959	0.1954	-0.1148	-0.1015	-0.8517	1.1781	-0.503	-0.3822	0.606	-0.5705	-0.7	0.7111	-0.4725	-1.6263	0.3473	-0.3966	-0.7068	1.3993	0.8174	-0.0753
O95994	AGR2	Neurology	-2.1408	-0.4901	-0.3956	0.2468	0.0751	-0.3796	-1.239	1.2527	-1.2359	-0.598	0.1615	1.2857	2.2693	-0.5814	-0.6837	-0.4673	1.7365	-0.0292	-0.5069	-1.6265	-2.8829	4.1874	-0.7515	1.8401	-0.3317	0.5741	1.4183	-1.1618	0.8963	3.7849	-0.9403	2.3476	-1.4131	0.7108	2.2237	0.0645	1.2147	-1.0557	0.3422	1.4553	0.6432	-0.7006	-0.5046	1.0879	3.8385	4.0817	-0.0391
O95997	PTTG1	Oncology_II	-0.2396	0.6367	-0.3919	0.3023	0.5449	0.01	-0.0623	1.7543	0.3251	-0.2177	0.5724	0.2522	0.2764	0.1468	0.0042	-0.0647	-0.4088	-1.163	0.0764	0.0344	-0.3291	0.4061	-0.4252	-0.4153	-0.0246	0.7778	-0.2595	0.1802	0.4479	0.638	-0.0174	0.4296	-0.444	-0.4775	-0.8654	2.4609	0.0826	-0.0939	0.5931	-1.029	0.0234	0.1878	-0.0256	-0.0042	0.3972	-0.031	0.0736
O95998	IL18BP	Cardiometabolic	-0.3991	0.181	-0.0846	-0.077	0.4208	0.3792	-0.6198	0.2728	-0.5582	0.0474	-0.5465	0.5369	0.2566	0.3051	-0.2618	0.0088	-0.2656	-1.0446	0.0522	-0.2084	-0.7599	0.5088	0.137	-0.7622	0.4414	1.0097	0.1432	0.3066	0.8655	0.7857	0.2412	0.781	-0.0661	0.4987	-0.1692	0.4176	0.0254	-0.5502	-0.1531	-0.3331	-0.2149	-0.0882	-0.0663	-0.1868	1.0082	0.2139	-0.5
O96007	MOCS2	Inflammation_II	0.0303	-0.1751	0.2125	-0.08	0.5819	0.3527	-0.2872	0.7689	-0.2928	0.424	0.0399	-0.0121	-0.4741	-0.5315	0.0565	0.3625	-0.6857	-0.4323	0.7875	-0.208	-0.5022	0.0081	0.2095	-0.6374	0.5861	-0.0764	-0.1796	-0.0175	0.1825	0.7167	0.0851	-0.1719	-0.3411	-0.2173	0.2584	4.197	0.6305	1.1118	-0.3124	-0.6931	-0.1252	-0.563	-0.1166	-0.8282	1.3289	-0.4365	-0.088
O96013	PAK4	Neurology	0.8607	0.2387	-0.0591	-0.192	0.116	-0.4027	-0.3846	0.0892	-0.3887	-0.0226	-0.2325	-0.3491	-0.4551	-0.7393	0.4133	2.0039	-0.0255	-0.1062	2.0664	0.8409	0.102	-0.2161	-0.5154	0.2487	-0.0708	-0.5514	-0.2368	0.6257	0.6492	0.5599	-0.2245	-0.8209	-0.333	-1.0205	0.3499	1.1453	0.3642	1.9598	-0.3448	0.0574	-0.4873	-0.0313	0.0686	-0.0428	0.2601	-0.1189	0.2802
O96017	CHEK2	Cardiometabolic	0.0813	-0.114	0.3973	-0.3536	-0.8	-0.7947	0.007	0.6275	0.4868	-0.5722	-0.0791	-0.3365	0.3366	-2.1362	0.9397	0.3413	-0.0371	-0.0403	1.3102	-0.7626	-0.028	0.4937	0.4808	-0.7598	0.2727	0.6099	0.0464	0.4991	0.2228	0.9992	0.9952	-1.2744	-0.2278	0.5662	-0.3632	2.9248	0.3379	-0.1086	-0.5045	-0.7917	0.3493	-0.4103	-0.1651	1.1734	0.9099	0.7409	0.7719
P00167	CYB5A	Oncology_II	1.2602	0.1509	0.4132	0.8571	0.0213	-0.6175	0.162	-0.5335	3.383	0.4242	-0.1742	-0.5742	2.6479	-1.0878	0.781	-0.3773	-0.7301	-0.7931	-0.7811	0.1704	1.0608	0.4297	-0.3051	-1.5761	0.1287	0.4206	-0.9022	0.4767	-0.1313	-0.775	2.6834	0.7477	-0.3865	-0.4737	-0.9975	0.6599	-0.796	-0.3091	1.5292	-1.3208	0.2129	-0.5925	-0.8816	0.66	0.4099	0.542	1.6163
P00325	ADH1B	Inflammation_II	-0.7618	0.4569	0.3746	-0.1144	-0.4157	0.3344	-0.2385	1.3263	-0.0877	1.7338	0.2427	-1.2249	-0.1205	-1.187	1.3616	0.1907	0.0423	0.1742	-2.996	0.9441	-0.1541	-1.9339	-0.0247	-1.4075	0.7187	-0.5124	0.1709	-0.4498	-0.2618	0.8606	-0.5738	0.0078	0.244	-0.2482	-0.2228	1.0329	-0.0431	0.2516	0.5717	-0.917	-0.9167	-0.8228	0.0859	0.4137	-1.2141	-1.1824	0.9502
P00352	ALDH1A1	Neurology	-0.3968	0.7633	-0.0089	0.3867	-0.637	0.577	-1.0782	-0.0972	0.0802	0.0762	-0.3275	-0.5571	-0.987	-0.3308	0.88	0.0684	0.3074	-0.1573	1.7737	0.5429	0.1104	-0.3506	-0.2199	-0.4458	0.4238	-0.121	0.3365	-0.1578	1.149	1.2011	0.8656	0.1234	-0.2283	-0.3811	-0.6634	1.8527	1.2176	-0.543	0.2457	-1.2222	0.9004	-0.9663	1.1474	-0.0023	-1.0116	-0.2083	0.1676
P00390	GSR	Inflammation_II	-0.3178	0.4052	-0.0566	0.3952	-0.0753	-0.0505	-0.2387	-0.3344	0.0602	0.0969	0.2045	-0.041	-0.0458	-0.1524	-0.0732	-0.3322	-0.0486	0.1279	2.4144	0.1675	0.0093	0.3962	-0.1355	-0.8099	0.6389	-0.0093	0.7422	0.479	0.8127	0.2615	0.3458	-0.1237	-0.1647	-0.432	-0.3677	4.6578	0.619	-0.1993	-0.1474	-0.2939	0.0125	0.2532	-0.2208	0.4065	0.4694	-0.337	0.0456
P00441	SOD1	Cardiometabolic	0.0817	0.0595	0.7668	-0.0698	-0.6303	0.6915	-1.0596	-0.0842	0.204	-0.4334	-0.4981	-0.2547	-0.8079	-0.4878	0.4719	0.1004	0.0182	-0.1336	1.7147	0.3623	-0.5563	-0.1426	0.0026	-0.141	-0.2076	0.3505	-0.3372	-0.1	0.7195	1.5062	0.4569	0.1256	0.2505	-0.3907	-0.2371	0.9712	0.4509	0.3356	-0.4403	-1.2059	0.9594	-0.955	0.9635	-0.0791	0.2104	0.3273	-0.7139
P00519	ABL1	Oncology	-0.229	-0.0025	0.0695	0.0099	-0.0251	0.14	-0.2859	-0.2277	-0.4775	-0.5144	-0.3503	0.0759	0.0022	0.0237	-0.1699	-0.4771	-0.3889	-1.1683	1.3678	-0.1585	-0.8158	0.6239	-0.4785	-0.8551	0.1205	1.3347	0.455	0.4539	1.1857	2.8396	0.1207	-0.2619	-0.5065	0.1354	0.1697	3.6382	0.6225	0.6901	-0.7193	-0.7342	0.0124	-0.1343	-0.1885	-0.2383	0.8861	-0.0725	-0.1402
P00533	EGFR	Cardiometabolic	-0.0562	1.3127	0.0424	-0.1028	0.4593	-0.0378	0.184	-0.1732	0.1766	-0.3133	0.3067	0.0856	-0.4181	-0.2046	-0.146	0.2257	-0.077	-0.2222	0.2407	0.6716	0.0924	-0.1708	-0.1829	0.0661	0.3766	-0.5366	0.1963	-0.0648	0.1124	0.1946	-0.1283	-0.2201	0.13	-0.2066	-0.1806	0.0894	0.0082	-0.0971	0.0719	-0.2814	-0.1564	-0.3346	0.3183	-0.0082	0.4242	-0.0306	0.0565
P00568	AK1	Cardiometabolic	0.198	-0.3516	-0.3422	0.4648	-0.7854	1.668	-2.0973	0.0077	0.8861	-0.6594	-0.3774	-0.5611	-1.085	-0.7621	1.1951	0.7551	0.6739	0.0251	3.4578	0.4235	-0.4015	-0.5445	-0.0228	0.4186	-0.0077	0.3569	-1.0111	0.1195	1.3207	2.2552	1.215	0.1024	-0.7216	-0.2554	-0.6367	0.5544	1.6358	0.9879	-0.4826	-1.7478	2.0947	-1.2096	1.2761	-0.1356	-1.023	0.9814	-0.6616
P00734	F2	Inflammation_II	-0.3558	0.1548	-0.0195	0.0484	0.2183	-0.1984	0.0069	0.8398	0.1412	0.0234	0.1622	0.0969	-0.1844	-0.0142	-0.1293	0.1333	-0.144	-0.2981	-0.0339	0.4697	-0.0069	-0.5937	0.6111	-0.0777	0.4677	-0.5046	0.2842	0.2779	0.1628	-0.175	0.1165	-0.038	-0.1089	-0.317	0.1136	0.9496	0.2419	0.2052	-0.0913	-0.4463	-0.1449	0.2821	0.1046	0.161	0.1534	-0.1616	-0.0922
P00736	C1R	Inflammation_II	-0.3022	-0.034	-0.2099	-0.2333	-0.0016	-0.1347	-0.2339	0.5625	0.189	0.1861	0.0016	0.1226	0.0089	-0.0398	0.1834	0.0452	-0.1082	0.0289	-0.2613	0.3018	0.0493	0.0494	0.7206	0.0101	0.1481	0.0359	0.0654	0.1306	0.2326	0.1239	0.0908	-0.2755	-0.0044	-0.2448	0.2297	0.1814	-0.0391	-0.1599	-0.0593	-0.3868	0.2646	-0.1034	-0.2274	0.3552	0.3142	-0.0017	0.2272
P00740	F9	Cardiometabolic	-0.4345	0.5446	0.2038	-0.1218	0.1044	-0.314	0.0821	0.1563	0.1227	-0.0069	0.2708	0.1647	-0.0022	0.0129	0.2874	-0.2369	-0.1217	-0.0871	0.3555	0.5139	-0.1934	0.2419	0.1535	0.0022	0.0039	-0.0639	0.0814	0.1667	0.4657	-0.1393	0.0356	0.1457	-0.157	-0.1879	-0.1546	0.3709	-0.0055	-0.0813	0.1124	-0.367	-0.0389	0.0428	0.4337	0.3341	0.571	-0.1466	0.041
P00742	F10	Inflammation_II	-0.1124	0.0839	-0.1746	0.1244	0.3341	-0.2664	-0.2253	-0.1101	0.1595	0.1104	0.2048	0.2458	-0.1525	-0.2055	-0.3004	0.1657	-0.4665	-0.0841	0.1709	0.1865	0.3125	-0.2094	0.0152	-0.2293	0.2202	-1.2812	0.1156	0.1868	0.1025	0.0307	0.0029	0.0489	-0.1294	-0.4037	0.2481	-0.2853	0.1137	0.0885	0.1967	-0.4873	-0.0814	-0.0922	-0.1869	0.1265	0.309	-0.1792	0.0637
P00746	CFD	Inflammation_II	-0.4998	0.0832	0.419	0.1419	0.284	0.0135	0.012	1.289	-0.7556	-0.3732	-0.4114	0.562	0.2981	0.0703	-0.0571	-0.1675	-0.2714	-0.5287	0.006	-0.3913	-0.0947	0.0708	1.5853	-0.9905	0.5788	1.5306	0.4761	-0.1144	1.2103	2.8142	0.3505	-0.5607	-0.2483	-0.2787	-0.0648	0.0587	0.5801	0.0222	-0.339	-0.2514	0.0702	-0.1087	-0.3523	-0.3464	0.7735	-0.0197	-0.1429
P00747	PLG	Inflammation_II	-0.3722	0.1953	-0.2142	-0.1365	0.3421	-0.2871	-0.0256	0.3456	0.3569	-0.2612	0.3262	0.6003	-0.1461	0.0369	0.0114	-0.1844	-0.3869	0.0227	-0.5577	0.4485	0.3902	-0.5806	-0.058	-0.0747	0.4934	-0.2554	0.3456	0.0522	0.3441	-0.0997	-0.0999	-0.4173	-0.1579	-0.38	0.597	0.3821	0.0567	0.0847	0.1765	-0.4092	0.2761	0.2186	-0.2479	0.2262	0.3978	-0.0036	0.0139
P00748	F12	Inflammation_II	-0.4126	0.4495	0.0348	0.2498	-0.6514	-0.7806	0.3194	0.7102	0.3788	-0.2908	0.0095	0.2688	-0.2205	0.2335	-0.6273	-0.4079	-0.5394	-0.7966	-0.2163	0.2612	0.3261	-0.5714	0.5677	-1.2119	-0.3429	-0.5676	0.3165	0.2845	0.6216	-0.3147	0.1673	-0.3295	0.1633	-0.5256	0.3459	-0.016	-0.973	0.3165	0.2493	-0.0763	-0.27	0.1572	0.3385	-0.4334	0.4683	-0.2867	-0.3023
P00749	PLAU	Neurology	-0.4177	0.3311	0.1269	-0.5438	0.3924	0.0148	-0.4857	-0.0614	-0.2453	0.0586	-0.0771	-0.2402	-0.1829	0.0669	0.0038	0.0115	-0.0886	-0.7186	0.5681	0.077	-0.5687	0.0899	-0.5339	-0.8395	1.0396	0.0441	0.2628	0.3118	0.8575	0.1011	0.0968	0.1927	0.0679	-0.148	-0.0714	1.2492	0.2918	-0.1532	0.1763	-0.4077	-0.462	-0.6354	0.0225	-0.1536	0.9388	0.0293	-0.0114
P00750	PLAT	Cardiometabolic	-1.1234	4.2292	0.915	-1.3152	-0.5353	-1.4886	-0.5381	2.5791	0.6173	0.4156	0.8611	-0.177	-0.9138	0.829	1.1623	-0.8971	0.8031	-1.4175	-0.5891	-1.0576	-0.7252	0.8783	0.3662	0.0058	2.1942	-0.2035	1.2082	1.1899	0.6276	0.3387	0.7305	0.2021	-1.0558	-1.1011	4.8003	-0.7592	2.2288	0.3057	0.8147	-0.9583	0.6377	-1.8393	-0.9747	-0.7599	1.0259	1.5659	-1.2388
P00751	CFB	Inflammation_II	-0.5569	-0.2318	-0.475	0.0265	-0.1536	-0.238	-0.0974	-0.3197	0.6892	0.0034	0.4095	0.2348	0.649	-0.0331	0.3064	-0.2262	-0.0814	0.3253	0.1275	0.6878	0.447	0.0285	-1.6543	0.255	0.442	-0.1742	0.7708	0.4236	0.5369	-0.0034	0.2134	-0.7941	-0.0398	-0.2065	0.7006	0.8381	0.147	-0.1326	0.1822	-0.7305	0.5175	0.3451	0.1644	0.6043	0.9838	-0.3271	0.239
P00797	REN	Cardiometabolic	-0.7754	-0.4828	-1.5271	-1.6253	0.4816	0.7081	0.0955	0.1436	1.4693	-1.432	1.4173	1.0992	0.4206	-0.0746	-0.2873	-0.3371	-0.451	-0.8632	-0.2616	-1.0583	-0.2167	-1.1241	0.0179	-0.2091	1.7378	0.0329	1.9681	0.2273	-0.1496	-0.1666	0.8659	-0.6062	-0.8428	2.3142	2.6762	0.1338	1.973	-1.3247	1.2736	0.1181	0.4958	0.2336	-0.2842	-1.7607	2.5159	-2.0944	-0.5238
P00813	ADA	Inflammation	-0.2582	0.3845	-0.0001	0.4422	0.0438	0.3387	0.038	-0.3468	-0.0268	-0.135	0.1406	-0.0769	-0.7308	0.1475	-0.2472	-0.0268	-0.3468	-0.3476	1.126	0.0263	-0.1426	0.2179	-0.5628	-0.0819	0.5571	0.4269	0.0318	0.0788	0.5191	0.4186	0.1512	0.1824	-0.1435	-0.1556	-0.6046	0.5227	0.6496	-0.3334	-0.0965	-0.6438	-0.1667	0.1446	0.1296	-0.3938	0.3541	-0.0988	-0.1058
P00915	CA1	Cardiometabolic	-0.0013	0.5533	-0.0771	0.3817	-0.6541	1.3046	-1.5834	0.0634	0.6062	-0.3469	-0.1156	-0.1731	-0.7606	-0.1687	0.8937	0.8172	0.2272	0.3038	2.0289	0.4187	-0.2494	0.0761	-0.003	0.1771	-0.3379	0.4282	-0.4518	0.4662	1.0107	1.6065	1.0543	0.4612	-0.6195	0.0013	-0.9236	0.4333	1.1807	-0.7688	-0.6803	-2.1506	1.462	-0.886	1.6256	0.2731	-0.8057	0.9256	-0.9782
P00918	CA2	Neurology	-0.0944	-0.0974	-0.0642	0.3252	-1.146	1.6557	-1.7391	0.1545	1.1205	-0.2894	0.0151	-0.443	-1.3159	-0.1105	1.097	0.9733	0.8925	-0.0162	3.5184	0.366	-0.3286	-0.0883	0.2508	0.2237	0.2471	0.8833	-0.342	0.3565	1.5567	2.2808	1.4013	0.3314	-0.9317	-0.0799	-0.9908	0.5383	1.9213	-0.459	-0.3785	-2.3375	1.9197	-0.8183	1.4828	0.3038	-0.6526	1.1037	-0.8112
P00966	ASS1	Cardiometabolic_II	0.234	1.2357	0.3052	0.7684	-0.4856	1.0153	-0.8089	-1.0524	-0.6562	-0.0207	-0.5256	-1.1732	-1.5454	-0.3348	0.826	-0.0216	0.4835	0.2599	-1.4702	-0.8905	0.5278	-0.961	-1.4169	-0.7097	0.7288	-1.1723	0.0959	-0.7629	0.3608	0.9404	-0.3559	-0.3718	0.4723	0.1328	-1.0069	1.2303	0.0455	0.2557	-0.0678	0.2076	-1.239	-1.3575	0.5556	0.4511	-0.4405	-0.8696	0.2927
P00995	SPINK1	Neurology	-1.704	0.2346	-0.4953	-0.6761	-0.0738	-0.1804	0.1214	-0.7984	-1.1644	-0.469	0.1427	1.0655	-0.0037	0.6318	1.2144	0.1441	-0.3082	-1.5351	0.3467	0.2765	-1.0799	1.606	0.1864	0.0568	-0.2951	2.2024	0.3027	-0.4546	1.4025	2.8832	0.2355	1.2138	-1.1213	-0.0518	1.7614	2.0393	0.8989	-1.3392	1.2107	-0.7836	0.019	0.0037	-1.7721	-0.8988	2.8141	0.2771	-0.21
P01008	SERPINC1	Inflammation_II	-0.1029	-0.0251	-0.1004	-0.0178	0.3388	-0.0599	0.2426	0.3526	-0.0799	0.199	0.2331	0.2073	-0.3223	-0.0018	-0.3916	0.3004	-0.1688	0.0719	-0.4051	0.1515	-0.1946	-0.7063	0.8331	0.195	0.3884	-0.3288	0.0593	0.1339	0.3966	0.1276	-0.1048	0.1644	-0.1326	-0.594	0.1397	0.2722	-0.091	0.2694	0.1995	-0.2022	0.0761	0.1863	-0.1952	0.2058	0.0698	0.0766	0.0692
P01009	SERPINA1	Inflammation_II	-0.6381	-0.0882	-0.1165	-0.1005	0.0785	-0.3141	-0.4714	1.1536	0.1623	-0.0404	0.0187	0.1381	0.3992	0.3789	1.613	-0.1079	-0.2513	-0.0067	0.37	0.2128	0.7284	1.2309	-1.1652	-0.0097	0.3391	0.9505	0.3767	0.5571	0.2396	-0.0346	0.0457	0.6088	-0.3338	-0.2013	0.0389	0.6388	0.0014	-0.3603	-0.0014	-0.4873	0.8851	0.1143	-0.0963	0.3248	0.8131	-0.1873	-0.0941
P01011	SERPINA3	Inflammation_II	-0.3273	-0.2979	-0.1818	-0.1099	-0.1082	-0.3096	-0.8061	0.0283	0.5692	-0.0809	0.4706	0.376	0.656	0.5231	0.3692	0.105	-0.2711	0.346	0.9197	0.4809	-0.3483	0.7794	-0.938	0.1284	0.5471	0.5464	0.6711	0.6787	0.4404	-0.1184	0.2282	0.5321	-0.2107	-0.4307	0.224	0.6409	0.0567	-0.1873	-0.1304	-0.5682	0.4746	0.4606	-0.0802	0.8156	0.9663	-0.1216	-0.0587
P01019	AGT	Inflammation_II	0.0322	0.1293	-0.0413	-0.3147	0.1627	0.1424	0.0758	-0.2875	0.0173	0.0824	0.2076	-0.0114	-0.0441	1.4284	-0.2126	-0.1014	-0.4066	-0.0414	-0.0868	-0.1046	0.7026	0.7726	-0.0291	0.0352	0.01	1.5545	0.5302	-0.0124	0.2325	-0.0845	0.4305	0.5212	-0.1682	0.1971	-0.0244	0.2377	0.5073	0.061	-0.0053	-0.128	0.9765	-0.0151	0.0382	-0.0263	0.2126	-0.144	0.0163
P01024	C3	Inflammation_II	0.11	-0.2306	-0.0132	0.3582	0.1063	0.1267	0.3937	0.1154	0.3126	-0.1407	0.0164	-0.0722	-0.3464	0.7702	-0.0901	-0.0748	0.1308	-0.0543	-0.2736	0.0943	1.7404	1.9726	0.4304	-0.2799	0.6629	1.9914	1.674	-0.0421	1.3798	-0.1322	0.3999	1.1661	0.076	-0.0431	0.0636	0.1435	0.7106	-0.1647	0.0995	0.0925	2.0248	0.0737	0.9566	-0.0149	0.1373	-0.507	-0.0703
P01031	C5	Inflammation_II	-0.2965	-0.2699	-0.1526	-0.0632	0.0779	-0.0841	-0.0291	0.64	0.2961	0.0854	0.007	-0.1928	-0.0019	-0.0274	0.2215	-0.0086	-0.0937	0.1234	0.1545	-0.0133	0.1994	-0.0593	1.2566	0.0645	0.5001	0.0019	0.2745	0.0328	0.4477	-0.0175	-0.1455	-0.1592	-0.2259	-0.4679	0.164	0.5723	-0.0807	0.0354	0.0324	-0.4057	0.1879	0.2598	0.1562	0.177	0.4253	-0.1863	0.2258
P01033	TIMP1	Cardiometabolic	-0.5825	0.2508	0.2887	-0.1768	0.3156	-0.5496	-0.4644	0.2798	-0.3547	0.1073	-0.6358	0.2523	0.6752	0.1883	-0.389	-0.2665	-0.6437	-0.7875	0.8733	0.0248	-0.8366	1.5264	-0.0467	-0.6119	0.0612	1.41	0.3254	0.4614	1.0308	0.4218	0.404	0.3995	-0.5874	-0.4291	-0.0187	0.9608	0.0267	-0.4781	-0.6427	-0.58	-0.0778	-0.2691	0.4671	0.0181	0.9122	-0.1931	-0.6566
P01034	CST3	Cardiometabolic	-0.63	0.6573	0.2647	-0.1421	0.2562	0.138	-0.133	0.345	-0.6697	-0.1653	-0.0187	0.729	0.4777	0.4861	-0.0013	-0.0154	-0.2508	-0.903	0.1927	-0.0939	-0.6368	1.0118	-0.012	-0.826	0.6624	1.509	0.5271	0.4139	1.0719	1.8437	0.3338	0.2795	-0.5905	-0.2325	0.203	0.4156	0.3806	-0.3324	-0.2337	-0.4116	-0.0309	-0.1837	0.3657	-0.0565	1.1074	0.0822	-0.1681
P01037	CST1	Inflammation_II	0.4805	-0.4756	-0.1943	0.0909	0.6446	-0.9197	-1.2177	0.5693	-0.6527	-1.6979	0.5289	1.9986	1.1297	-0.8855	-1.5187	5.9291	0.198	-1.64	1.6347	-0.8134	0.3931	0.5745	2.0658	-0.9977	1.3841	2.5399	-0.3236	2.4331	2.0614	3.5393	0.4141	0.1542	-0.048	-1.0007	-0.9388	1.8468	-0.4312	-1.487	-1.4077	-2.2033	-0.6496	-0.6386	-0.7953	0.0018	0.8055	0.9435	0.6669
P01100	FOS	Oncology_II	-0.2433	-0.1696	-0.938	0.0752	0.5373	-1.8105	0.0871	-0.2652	0.5567	0.4761	0.255	-1.9004	-0.1737	-0.8102	0.2646	-0.2818	-1.3018	0.4522	1.6253	0.3091	0.217	0.0647	0.2637	-0.5775	0.314	0.1953	0.21	0.1835	0.5071	1.066	0.1296	-0.5307	-0.1444	-0.5174	-0.9837	1.9937	0.7009	-0.7268	0.2806	-0.6721	-0.7842	0.3357	-1.0834	0.6988	1.2755	0.0729	-0.7133
P01112	HRAS	Oncology_II	-0.4113	0.2321	1.1239	0.0832	0.0872	-0.5312	0.0213	1.017	0.0686	-0.0695	-0.0445	-1.2812	0.666	0.3231	0.4462	-0.2444	-0.0039	-1.1998	0.3802	0.7637	0.5074	0.8578	0.2892	-0.1741	-0.1816	0.0628	-0.7358	-0.077	0.2431	0.4613	0.3658	4.0972	-0.4816	-0.9351	-0.3428	1.9392	-0.1528	-0.5961	0.6174	-0.5497	-0.1732	-0.2787	0.2157	0.447	3.9793	0.2972	-0.2804
P01127	PDGFB	Inflammation	1.296	2.3729	-1.7946	-0.3759	-0.0674	0.6135	-2.6648	0.9452	0.2302	-2.1971	-1.1129	2.2655	-2.5921	-2.6066	-0.2429	-2.8477	-0.2176	-1.2547	1.9706	-2.0993	0.1688	0.1925	-1.4316	0.3816	-0.4574	-2.4566	-0.735	-0.2875	1.0015	0.2996	-0.8923	-2.1368	-1.0412	0.3147	4.1929	-0.2889	0.8131	1.8245	-2.9254	1.3776	2.8639	-3.2645	-0.0072	-0.4889	1.4591	-3.263	-0.0431
P01130	LDLR	Cardiometabolic	-0.6018	1.3225	0.2633	0.0099	0.2651	-0.0749	-0.2339	-1.0561	-0.1212	0.996	-0.1687	-0.8794	-0.7654	-0.0099	-0.8777	1.8317	0.2524	-0.61	-0.1227	1.1364	1.0091	-0.0879	-0.3956	-0.6844	0.0981	-0.9501	0.6234	0.5301	-0.1339	0.1884	-0.2367	-0.523	-0.2804	-0.8211	0.7928	2.4021	0.133	0.9272	0.3608	-1.2532	0.1265	-0.028	0.2467	-0.3549	-0.5294	-0.0576	-0.3005
P01133	EGF	Inflammation	3.9963	2.1002	-0.9317	1.3494	1.2629	1.3442	-0.7638	0.7526	0.1066	-2.1363	-0.6672	1.313	0.3233	-1.3373	-0.3303	-1.9593	-1.5884	-0.7422	0.7989	-0.6936	-0.661	-0.2627	-1.0702	0.5381	0.9992	-1.5991	-0.2487	0.159	1.6827	-0.8857	0.5646	-1.8355	0.0187	-0.1118	4.4156	-0.8463	-0.5107	4.3806	-1.3112	1.9616	0.8992	-2.4785	0.4847	-1.4906	1.9116	-1.6132	-0.8938
P01135	TGFA	Inflammation	-0.3261	0.0192	0.1135	0.1902	-0.1101	-0.0396	-0.7191	0.4509	-0.2533	-0.3336	-0.0677	0.4481	0.3943	-0.0231	-0.0017	-0.2056	-0.3138	-0.6708	1.7227	-0.5143	-0.6585	1.8471	0.0213	-0.3242	0.3699	1.1343	0.1192	0.4581	0.2629	0.678	0.207	0.7094	-0.4836	0.2059	-0.0864	-0.3586	0.3223	-0.811	-0.3278	-0.6895	0.4554	-0.1354	-0.1846	0.2577	0.8257	0.0503	0.2288
P01137	TGFB1	Inflammation	-0.3871	-0.322	0.2864	0.1451	0.3576	-0.3323	-0.4998	0.0831	-0.3636	0.1827	-0.6339	0.358	-0.1059	0.2052	-0.2812	-0.5228	-0.5111	-1.1185	-0.2312	0.0483	-0.9241	0.5559	0.0035	-1.2916	0.2891	0.5054	-0.0848	-0.0116	1.1908	0.7342	0.3086	0.0126	-0.4729	0.0829	-0.0748	0.7323	0.0919	0.2914	-0.067	-0.1021	-0.189	-0.2932	0.009	0.3612	0.418	-0.0783	-0.0465
P01138	NGF	Neurology	0.062	0.0786	0.0104	0.0297	-0.0076	0.1044	0.0824	-0.1945	-0.0018	-0.0722	0.0306	0.0774	-0.0332	0.046	-0.056	0.0943	0.0271	-0.0998	-0.101	-0.0505	-0.0608	-0.1432	-0.0282	0.0879	0.0416	-0.031	0.0096	-0.1276	-0.1162	-0.0259	-0.0309	0.0208	0.0035	0.0373	0.0902	2.1777	-0.0584	0.0816	0.0168	0.0136	0.06	-0.0372	-0.042	-0.1091	-0.0589	0.0953	0.043
P01178	OXT	Neurology	0.6072	2.7131	-2.0068	0.6548	2.3622	0.2559	1.056	-1.8078	-2.1656	-1.2549	0.0027	1.3005	-2.4315	-1.0608	0.8573	-3.5297	-2.8959	0.6752	-0.9489	0.3766	-0.1128	0.8009	-2.2028	0.3928	-0.8379	-0.0179	2.243	-2.6387	1.6294	3.9811	-1.5068	-0.7512	-2.1573	-0.5201	0.1017	-0.8161	1.0011	-0.8187	-1.6837	0.7674	-3.3023	1.2712	2.8414	-0.5295	1.5892	-1.0871	0.6803
P01189	POMC	Cardiometabolic_II	0.2234	0.0477	-0.652	0.3505	0.4212	-0.8052	-0.6188	-0.0349	0.4751	0.2826	0.0891	0.6817	-0.0226	0.571	0.5459	0.5923	-1.4118	-0.9154	-0.7655	-1.9537	-1.7836	-0.8136	-1.412	0.5381	0.7928	-1.3549	-0.296	1.1189	2.0583	1.9677	0.2014	-1.5728	0.6834	0.0397	-0.2478	0.1773	1.923	-0.4456	0.1486	-0.213	-0.1134	-0.499	-0.2612	0.7613	-0.2303	0.5604	0.4882
P01210	PENK	Inflammation_II	-0.6669	0.0981	0.2306	-0.1135	1.31	0.1712	0.3305	0.6409	-0.59	0.6616	-0.041	0.7167	0.1361	0.1325	-0.4357	-0.0113	-0.1844	-0.9036	0.5997	-0.1831	0.2004	0.8696	0.571	-0.7087	0.6551	1.8723	-0.0669	-0.1393	0.8239	3.0601	0.039	-0.0241	-0.3898	-0.0714	0.1062	-0.2959	0.426	-0.3237	-0.074	-0.257	0.0505	-0.3445	-0.296	-0.4628	0.2107	-0.0134	-0.5601
P01222	TSHB	Cardiometabolic	-0.3826	0.9835	0.728	-0.2431	0.3772	-0.222	-0.69	-0.2292	-3.1323	0.0299	-0.7679	-0.8472	0.6355	-1.6223	-0.0989	1.5548	-0.8825	-2.7793	0.7391	0.0538	0.1952	2.1671	-0.648	-0.7038	0.333	-0.9391	-0.5894	0.2319	0.5344	0.0101	1.9201	-0.7921	-0.3859	-1.034	-0.2497	1.3696	0.3528	0.3241	-0.7673	-0.3137	-0.3454	0.6699	0.178	-2.3278	0.8566	0.9067	-1.1106
P01225	FSHB	Cardiometabolic_II	0.0104	-0.2085	0.3666	-0.1541	-0.0126	0.2705	1.8541	-0.122	-0.1964	0.707	0.1973	-0.1136	0.802	1.1305	-0.4686	-0.2006	-0.2228	-0.0151	1.5081	0.6384	0.4242	-0.308	-0.11	0.1509	0.5516	0.9821	0.1283	1.5443	-0.1978	0.9198	1.4478	-0.0871	-0.0318	-0.1812	1.0035	-0.3487	0.2312	-0.2967	1.1813	0.0589	-0.1481	1.1763	-0.2388	-0.2008	-0.0051	-0.1935	-0.4156
P01229	LHB	Oncology	-2.7865	-1.0406	-0.7592	-1.3223	0.506	0.5458	1.4474	2.3055	1.02	-0.5738	-1.4538	-0.0492	4.094	-0.5812	2.0039	-1.1264	0.1156	-0.912	2.5407	0.9934	0.7171	-0.1056	6.0608	-1.4911	-0.7306	0.1472	-0.8383	0.612	-1.2027	2.8025	0.4014	0.6503	0.0096	-1.4906	-0.1757	-2.4238	2.9669	1.7001	0.0151	-1.0259	-0.2271	-0.4283	1.4449	0.0134	0.4127	-0.7021	0.2972
P01236	PRL	Neurology	-0.5577	0.0061	0.9246	-0.6931	-0.7434	-0.5781	-0.0637	-0.8702	-0.3034	0.5774	0.2767	-0.5259	0.737	-0.4278	-0.7877	-0.0965	0.3422	-0.2437	-0.1129	0.6292	1.0271	-0.0099	0.3682	-1.201	1.0019	0.8166	1.9869	0.8767	0.5714	2.2218	0.2082	-1.3437	-0.1538	0.6426	-0.3681	0.9024	-1.4943	-1.4002	-1.061	1.0988	-1.054	0.268	-0.4384	1.739	0.7406	-0.2302	-1.5651
P01241	GH1	Cardiometabolic	1.1972	-1.9294	-1.0054	-0.7936	3.856	0.9253	0.1694	3.7185	2.2224	3.426	-1.4019	-1.3835	-0.8535	-1.3641	-1.5242	0.8745	-2.0926	-0.3848	0.8101	-0.0049	-1.0984	-0.5804	-0.2585	-1.3137	-1.014	-0.1222	-0.7438	1.3064	-0.6157	4.6658	0.0049	3.9128	1.4184	-0.9678	-1.711	0.9234	-3.6846	0.8865	1.5302	-1.7858	-3.0068	-1.7847	-0.1937	0.6827	1.6214	1.0566	-3.2187
P01242	GH2	Oncology	0.5689	0.1191	-0.6179	5.8508	1.1682	-1.2867	-0.2144	0.6473	-1.0206	0.3364	-0.9196	-0.0057	4.8437	-0.1675	0.075	1.3819	2.9843	-0.2648	1.3852	-0.3202	0.528	-0.1194	0.4878	0.2492	-0.5845	-0.9719	-0.0083	0.3029	-1.0089	-1.6384	0.4922	6.5615	2.0129	-2.0057	1.3939	-0.6968	3.0349	0.1356	0.4062	-0.6757	0.6827	-0.0363	-0.3742	-0.2377	-1.2562	2.4757	-0.662
P01258	CALCA	Neurology	-0.0433	-1.1952	0.8085	-0.0353	0.7855	-0.6019	-1.7426	0.5569	3.1137	-0.6117	-0.6117	0.0123	0.8745	3.2012	-0.375	0.1596	1.7633	-0.9791	1.1785	-1.051	-1.5051	0.0262	-0.6296	-0.2488	0.9476	3.2575	0.2165	0.5003	-0.1968	4.067	-0.8291	5.7258	0.7435	0.2525	0.7677	4.7068	0.0565	-0.7341	-0.53	-1.06	-0.753	-0.242	0.2554	0.8712	1.3813	-0.9827	0.7334
P01266	TG	Oncology_II	1.7549	-0.07	-0.6171	-0.6615	-0.1633	-0.2064	0.0352	0.0506	1.5917	-0.8988	1.7444	-0.7705	-0.0289	1.7485	0.2269	-1.6107	-0.3485	0.5584	1.1716	-1.0006	-0.8369	-0.3469	2.5308	-0.996	2.0108	3.8802	0.1909	2.3236	0.141	3.0939	0.2198	0.4076	-0.1539	-0.7436	0.2719	-0.376	1.0394	0.0988	-0.4695	-0.7917	-0.2092	-0.0994	-1.0701	0.4028	-0.0498	-0.6879	-0.6312
P01270	PTH	Neurology_II	0.7954	0.5146	2.4785	-0.1753	0.7928	1.0387	-0.439	-3.198	0.3571	-0.1082	-0.0027	-0.6247	-0.0688	-0.1853	-0.4982	0.86	-1.1555	-0.7097	-1.7496	1.2733	0.7698	-1.3879	-0.2628	0.1777	-0.3856	6.5213	-0.3856	-0.8132	2.0524	2.831	-1.1343	-1.2902	0.0691	-2.4727	0.8804	-1.633	0.7224	1.5304	-0.0658	-1.1184	-0.7861	0.1335	0.874	0.9405	-2.0556	-0.3591	0.4042
P01275	GCG	Oncology	-0.3037	3.6721	2.7906	0.8106	-1.1083	-0.6504	2.5485	-1.6718	-0.5722	-1.5363	-2.1972	-0.395	-2.455	-0.1433	-1.4717	1.2702	-0.5784	-1.1505	0.2602	-1.1262	-2.0935	2.0006	0.4286	-0.0892	2.1789	1.808	-0.3309	-1.5616	2.2586	1.0627	-2.8303	2.9905	0.1525	0.0782	3.648	-0.06	2.5283	0.9611	0.06	-1.2459	-1.1771	-0.2717	1.4702	0.4141	-0.1573	-1.0368	0.9849
P01298	PPY	Oncology	-0.2485	0.5737	0.6848	-1.1193	-0.107	-0.5914	0.1374	-0.6299	-0.4413	-2.406	0.5707	0.5592	-1.421	1.1998	0.6243	1.9302	-0.0204	-2.6606	-0.3074	-0.9164	-1.2551	2.1778	-0.8085	0.7578	1.8135	0.043	2.8135	0.7797	2.1335	2.5501	-2.7215	-3.3589	0.3422	-1.0928	-1.0501	0.801	1.4449	-1.3715	0.2517	-0.0794	0.9327	0.3778	1.405	1.3086	1.4953	-0.3765	0.0784
P01303	NPY	Oncology	0.0486	0.4066	0.306	-0.2259	0.3585	-0.114	0.2516	-1.1073	-1.2555	-0.5927	-1.251	0.4099	-1.4611	-0.6717	-1.3753	0.6084	-0.0056	-1.9746	-1.3314	-1.0587	-1.8124	-0.4867	-1.2703	-2.0246	0.0917	0.7201	0.7373	-0.0748	-0.1548	0.7956	-1.0208	0.8669	0.2638	-0.5407	1.4539	-0.6629	1.9077	0.6607	0.2307	-1.934	0.1357	0.7532	0.4656	-0.6528	-0.0219	-0.8779	0.299
P01350	GAST	Neurology_II	-0.7972	1.4557	0.5764	-1.7381	-0.9748	2.5578	-1.0815	2.0146	-2.3599	2.762	-1.1944	-2.0297	-1.1495	3.5983	-0.8652	-1.0235	3.2533	-2.4855	1.3094	-2.3356	-1.7714	-0.4064	3.1847	0.0242	0.4721	1.8388	-1.2605	-0.9666	-0.3291	2.7809	-0.5216	1.4523	-1.9178	0.6553	1.52	0.2138	1.8075	1.6238	2.1352	1.8491	2.4204	1.3915	-1.8225	1.8891	-2.0182	-0.1322	3.0764
P01375	TNF	Cardiometabolic	-0.5649	2.4088	-0.2884	0.069	-0.0931	0.2012	-0.4983	0.6639	0.0964	-0.0049	-0.2911	0.039	0.2006	-0.0641	-0.2171	0.5016	-0.4416	-1.065	-0.0934	-0.2565	0.9994	0.0292	-0.3055	0.0902	0.0871	-0.1223	-0.2199	-0.0809	-0.0042	0.4638	0.2556	0.0737	-0.7228	-0.217	0.2689	0.35	0.8889	0.3262	0.1616	-0.2812	-0.6077	-0.0952	0.7769	-0.4451	0.4147	-0.3209	-0.1819
P01375	TNF	Inflammation	-0.408	2.2107	-0.1587	-0.189	0.0817	-0.0276	-0.6615	0.4706	-0.1947	0.2386	-0.2486	0.0956	1.0559	-0.2591	-0.1721	0.6042	-0.1936	-0.2426	-0.1002	-0.4538	1.3102	0.3427	-0.1785	0.059	-0.3493	0.3385	-0.0063	-0.0129	0.6321	0.8339	0.6643	0.4314	-0.811	0.4102	-0.0205	0.8299	0.8556	0.0031	-0.076	-0.3163	-0.4642	-0.9606	0.9432	0.0836	0.367	0.4049	0.2234
P01375	TNF	Neurology	-1.0204	-0.1421	-0.5685	-0.2288	-0.4795	0.4863	-0.5168	0.2888	-0.5587	-0.033	0.1444	0.3492	0.7417	-0.2062	-0.5806	-0.0606	-0.1365	-1.1666	0.1935	-0.3419	-0.9629	0.8065	0.5634	-1.3075	0.44	0.5817	-0.0039	0.2955	0.5823	1.0644	0.6021	0.8937	-0.7458	0.2665	0.5765	1.354	0.6267	-0.4131	0.132	2.8172	-0.2974	0.1609	0.0039	-0.0085	0.8042	0.5016	-0.2874
P01375	TNF	Oncology	-1.011	2.1898	-0.3238	-0.6346	-0.1417	0.14	-1.0049	-0.3633	-0.1707	0.3362	-0.1014	-0.2165	0.8367	-0.0195	-0.3615	0.9193	-0.1538	-1.0532	0.494	-0.538	0.877	0.4642	-0.0576	0.3613	0.2361	0.2022	-0.0256	-0.0285	0.3843	0.7818	0.4321	0.3366	-0.2671	0.3887	0.328	0.2341	0.9061	0.0195	-0.1817	-0.5802	-0.4256	0.2619	0.9035	-0.1904	-0.204	0.8296	0.089
P01579	IFNG	Inflammation	-0.2616	-0.705	1.3225	-0.7557	0.1817	2.9286	-0.3751	0.0067	4.0161	0.5651	0.0541	1.1216	0.5022	-1.2834	-0.9918	-0.7912	0.7646	-0.5927	0.0515	0.354	0.0542	-0.5593	2.7195	-1.3709	-1.0998	2.9079	-0.0407	0.0782	1.297	0.1603	2.793	-0.6778	0.7644	1.0068	-0.0067	-3.8916	1.8756	1.2918	0.4404	-1.6636	-1.3862	-0.6224	-0.1223	0.9846	-0.8294	1.3016	-1.6924
P01583	IL1A	Inflammation	0.3008	-0.6186	0.5342	-0.0513	-0.9505	-0.1768	-0.4693	-0.1812	0.7186	0.4995	-0.2719	0.3985	0.5068	1.1618	0.2371	1.6361	-0.9125	-0.2612	0.8316	-0.0151	0.6283	0.3708	-0.0992	1.5618	-0.1236	0.0656	-0.1921	-0.2723	-0.5549	0.0449	-0.4704	-0.2537	0.8864	-0.2159	0.2734	-0.2382	-0.5297	0.0951	-0.7521	-0.3875	3.3334	2.1221	-0.5706	-0.098	0.3462	-0.1171	-0.5671
P01584	IL1B	Inflammation	0.1111	-0.5499	-1.2537	1.2292	-1.1376	-0.3741	-1.7409	1.2984	0.6983	0.4015	-0.4557	-0.4788	0.8052	0.7723	1.0545	-0.1622	-1.1381	-0.9643	3.1931	-1.4682	-0.6177	2.9888	0.5289	-0.7521	0.418	0.7623	1.4422	0.435	-1.0129	0.2749	0.2169	1.0375	-0.0287	-1.1338	0.9203	0.8068	1.0173	0.4331	-0.2173	-1.3358	1.9553	-0.5555	-1.5091	0.75	2.6248	-0.5285	1.2725
P01588	EPO	Inflammation	0.3349	0.2484	0.5911	0.1045	-0.3027	-0.8207	0.202	-2.4177	1.0394	2.2285	-0.9046	-2.2193	0.3778	0.7527	-1.2803	-0.2215	-1.3535	-1.9588	2.4734	-0.7648	0.4261	0.6309	-0.0753	0.2538	2.3602	3.1621	-0.7829	0.3901	1.2078	-1.0272	0.3076	2.2668	-0.7475	0.4555	0.0714	1.1949	0.4338	-0.8902	-1.9003	-0.4828	-0.3969	4.8542	-1.3708	0.3414	0.3081	-2.1958	-1.4822
P01589	IL2RA	Cardiometabolic	-0.5575	-0.1597	-0.3982	-0.4638	-0.0249	-0.2525	-0.7162	0.7554	-0.2926	-0.0655	0.0011	0.6028	1.0578	0.2806	0.8244	-0.289	-0.0463	-0.7142	1.272	-0.6272	-0.3054	1.0988	0.8896	-0.9106	0.3225	2.0371	0.0589	0.6466	0.6337	1.1562	0.6809	0.8841	-0.0011	1.1667	-0.1931	1.4604	0.3624	-0.9279	-0.4697	-0.5362	-0.386	0.1372	-0.0642	1.1999	1.1879	0.6608	0.2156
P01591	JCHAIN	Inflammation	0.1311	-0.1822	-0.3102	-0.0504	-0.2483	-0.2657	-0.0503	-0.1907	-0.2653	-0.6018	-0.2542	0.6137	0.3227	0.0236	-0.016	0.0553	-0.1127	-1.1353	0.5933	0.0585	0.0794	0.1626	0.5387	-0.3788	-0.1108	0.776	0.3329	-0.4856	-0.5264	0.9241	0.6669	0.0209	0.2312	0.4775	0.249	-0.1921	0	-0.2701	0.1754	0.0561	-0.3817	0.2112	0.2446	-0.5342	0.4952	-0.4655	-0.2355
P01730	CD4	Inflammation	-0.7631	0.0021	0.4319	0.3442	-0.012	-0.2893	-0.0776	0.2706	-0.4383	-0.1969	-0.0701	0.4928	0.4	0.3486	-0.267	0.1783	-0.3328	-0.8878	0.3684	0.0748	-1.0904	1.4828	-0.6556	-0.5184	0.5013	1.768	0.7828	0.5926	0.5444	1.4826	0.3683	0.2122	-0.4044	-0.1301	-0.0724	1.0815	0.6113	-0.0021	-0.4771	-0.4492	-0.0669	-0.1469	-0.1226	0.2355	1.7856	0.0238	0.0264
P01732	CD8A	Neurology	-0.6909	-0.5203	-0.0717	-0.4573	-0.3629	-0.1415	-0.0197	0.4501	-0.0926	0.8487	-0.1668	-0.2796	-0.0489	0.0966	-0.27	0.8425	-0.0145	-0.2865	0.8618	0.2235	-0.8483	0.4807	0.2644	-1.5812	0.2575	0.8229	0.2867	0.0519	1.3125	0.5124	-0.2676	2.0187	-0.2697	1.1905	0.4088	0.1813	-0.0434	0.0262	0.0469	0.4152	-0.6165	0.5171	0.3932	1.4778	0.5866	0.8835	0.422
P01833	PIGR	Neurology	-0.6621	-0.335	0.0532	-0.4877	-0.3288	0.2334	-0.5773	0.2791	-0.0157	0.4502	-0.3178	0.3117	-0.028	0.4838	1.0418	-0.1246	-0.6993	-0.9198	0.9138	-0.0966	1.4152	0.2472	0.0157	-1.0491	0.447	0.2992	0.4216	-0.3503	0.2696	1.6836	-0.3205	0.9738	1.6398	-0.0944	0.0873	1.5432	0.0266	-0.2822	0.378	-0.68	0.0766	-0.6684	-0.3486	-0.6292	0.1937	-0.0344	-0.2949
P01903	HLA-DRA	Inflammation	-0.3422	-0.1804	1.1076	0.1677	0.4564	0.0622	0.3139	-0.7279	0.1744	0.0509	0.0392	-0.0109	-1.333	0.0604	0.0318	1.0859	-0.7489	-0.8233	0.0487	-0.4303	-0.1238	-0.1915	-0.3097	-0.2984	0.5	-0.3878	-0.1316	0.081	0.9376	-0.1104	0.4319	1.0126	1.1862	-0.3213	-1.0572	0.6541	-0.2087	-0.8045	0.0168	0.6681	-0.7337	-1.0326	0.4479	-1.0124	0.486	0.1817	0.2651
P02008	HBZ	Cardiometabolic_II	0.3887	-0.1172	1.9604	1.2568	-0.4035	1.4015	-1.9684	-1.4464	-1.306	0.119	-1.5964	-0.9863	-2.1419	-1.5495	1.2235	1.7726	0.8079	2.2903	1.2431	0.9718	-0.9452	-1.7444	0.9907	1.0441	1.5687	-1.9023	-0.8434	-0.3863	1.9017	2.1309	2.8972	-1.4324	-2.5935	-0.9523	-2.0532	1.4677	1.4705	-0.6821	1.5952	0.2866	2.157	-0.0256	3.0242	0.3752	-0.5467	-2.0375	-1.6365
P02144	MB	Cardiometabolic	-0.3516	1.8184	0.7942	-0.2778	0.4832	0.7207	0.0609	-0.8497	-1.3179	-0.5527	-0.2493	-0.6081	-0.2773	-0.4322	-0.6367	0.7401	-0.2303	0.184	0.8435	-0.35	-1.0923	0.2043	-0.2194	-0.973	1.2865	1.1324	0.0144	-0.4131	1.4259	2.62	0.4844	-0.3343	-0.3692	-0.1171	-0.5725	1.1072	0.6868	0.6668	-0.3893	0.5137	-0.3423	-0.8111	0.2666	-0.6416	-0.5367	-0.3083	-0.6082
P02452	COL1A1	Cardiometabolic	-0.2306	0.5035	-0.0501	-0.0459	0.4238	0.2013	0.0391	-0.2324	0.0545	1.2149	-0.1339	-0.2218	0.7792	-0.011	-0.5083	0.5202	-0.1783	-0.7296	-0.0567	-0.165	-1.5414	1.0732	0.1192	0.4771	-0.9657	1.5572	-0.6791	1.3227	0.801	1.4696	-0.9472	-1.2695	-0.0632	-1.2398	-0.3771	1.4775	-0.3398	0.2972	0.5287	-0.0624	0.4352	-0.4514	-0.2535	-0.1736	1.1959	0.2892	0.6068
P02458	COL2A1	Cardiometabolic_II	0.7899	0.4881	0.0947	-0.1603	0.3551	0.2631	0.5717	0.1058	0.6666	0.1526	-0.2077	0.801	-0.4959	-0.2269	-1.0124	-0.2739	0.3533	-0.2474	-0.4884	-0.4201	-1.0175	-0.2019	-0.6793	-0.0784	-0.1754	-0.4828	-0.4843	0.2018	0.6488	-0.0774	-0.2679	-0.4538	0.308	-0.1029	1.9875	0.3454	0.8765	1.9388	-0.3944	0.9528	0.6954	-0.5796	0.1042	-0.4572	-0.1219	-0.1438	-0.272
P02461	COL3A1	Cardiometabolic_II	-0.1769	0.5919	0.3015	0.113	0.428	-0.0878	0.3749	-0.0692	0.1096	0.4779	-0.2259	-0.0097	0.1703	-0.4286	0.0084	0.1176	-0.3748	-0.4566	-1.0076	-0.2682	-0.2596	-0.48	-0.0044	-0.2409	0.0234	0.3903	0.6525	1.595	0.497	0.861	0.4287	-0.3258	-0.1953	-0.3822	0.0496	1.181	0.2263	0.0835	-0.4303	0.8408	-0.1925	-0.054	-0.3842	-0.1475	0.5827	-0.0531	0.1867
P02462	COL4A1	Cardiometabolic	0.0878	0.7038	0.7991	-0.2192	0.7048	0.3253	-0.6538	0.1109	0.1641	0.1708	-0.5107	0.4326	-0.2363	-0.7031	-0.2659	0.2397	-1.0131	-0.7016	0.2555	0.1312	0.1913	0.0508	-0.4729	-0.4592	0.5389	-0.0375	-0.2131	-0.5276	0.6009	0.1513	-0.2127	0.3104	-0.7026	-0.1527	-0.5508	3.1164	0.2018	-0.3062	0.1749	0.3269	-0.1501	0.0497	-0.406	-0.4163	1.2926	0.5765	-0.1336
P02533	KRT14	Neurology	0.5183	-0.0685	0.7504	-0.3782	-0.3874	-0.8295	-0.3931	1.3835	-0.3739	-0.5967	-0.2206	2.0834	-0.2324	0.2969	-0.0578	0.3256	0.2194	0.7111	2.3064	-0.3738	-0.1351	0.6664	0.0406	0.1195	0.7151	-0.8141	0.2369	1.94	1.1868	1.2249	-0.6063	-0.0517	0.1715	-0.2208	-0.5834	0.2469	0.6681	-0.2999	-0.4885	-0.8018	-0.6254	0.1965	0.0219	1.721	1.8067	-0.156	0.161
P02647	APOA1	Inflammation_II	-0.0572	0.4835	0.0009	-0.0549	0.3395	-0.283	0.1858	0.9153	-0.3391	0.0291	0.1246	0.649	-0.1516	-0.3865	-0.0946	-0.085	0.0516	-0.3457	-0.4863	0.2848	0.48	-0.4641	0.4286	-0.3089	0.3927	-0.2921	-0.1545	-0.138	0.2168	-0.0774	0.0941	-0.0397	-0.0009	-0.0773	-0.2329	0.1109	-0.1291	-0.2616	0.0968	-0.1834	-0.106	-0.1105	0.1344	-0.2834	-0.2138	0.1675	-0.1028
P02649	APOE	Inflammation_II	-0.5087	-0.1626	0.114	-0.2815	0.0206	-0.3678	0.1082	-0.8085	-0.0899	0.6102	0.0305	-0.0324	0.5965	0.1795	-0.4717	0.7528	-0.122	-0.3916	0.8805	0.5434	0.1046	0.21	0.0901	-0.1836	-0.1371	0.0429	-0.3808	0.3479	-0.0179	-0.0589	0.4853	-0.4132	-0.4608	-0.6179	0.0767	0.4744	-0.2888	-0.23	-0.4084	-0.645	0.036	0.155	-0.0278	0.1337	0.4676	0.2667	0.1793
P02652	APOA2	Inflammation_II	-0.0241	-0.6149	0.156	1.3859	0.0241	-0.2955	-0.6343	0.0888	-1.6425	-0.5849	-0.1964	-0.3766	-0.4331	0.1237	-0.422	-0.0769	0.1611	-1.0393	0.3772	-0.5035	-0.1933	0.081	-0.3693	-0.5846	1.2454	0.6576	-0.8491	0.4528	0.5675	2.4455	-0.5323	0.0639	-0.3273	-0.9649	-1.2883	0.6419	0.5819	-1.0061	-0.4767	-1.0869	-0.1694	0.1206	-0.5141	-0.5231	0.5105	0.1374	0.1409
P02654	APOC1	Inflammation_II	-0.3285	0.3959	0.1638	-0.3892	0.2328	-0.4354	-0.0835	0.1836	-0.0502	0.5395	-0.1974	0.2809	-0.0449	-0.3983	-0.0605	0.3937	-0.0955	-1.2421	-0.1808	0.3494	0.4391	-1.5069	0.6634	-0.3083	0.2875	-0.2165	-0.3398	0.4192	0.0003	0.2011	0.088	-0.365	-0.1598	-0.4613	-0.1114	0.1061	-0.0563	0.259	-0.2066	-1.1926	-0.3248	-0.4483	-0.4802	-0.1814	-0.4991	0.5495	0.3717
P02671	FGA	Inflammation_II	-0.666	-0.0066	0.1161	-0.3175	-0.1396	-0.7648	-0.5099	0.6574	0.9924	-0.1628	0.6955	0.366	-0.2006	0.4987	0.9129	0.2266	-0.2337	0.3776	0.7281	0.5759	-0.1323	0.2179	-0.4586	-0.1234	1.0936	0.6481	0.3214	0.8383	0.9115	0.5419	0.4676	-0.5818	-0.4939	-0.711	1.2735	0.5201	-0.0819	0.4009	0.0488	-0.5573	0.5293	-0.1305	-0.3146	0.4625	1.5711	0.328	-0.1189
P02730	SLC4A1	Cardiometabolic_II	-1.6502	0.5956	-0.0118	-1.6509	-2.5741	-1.9536	1.3115	-3.1425	3.3624	-2.397	2.3431	1.148	-2.7374	0.3344	1.0475	-0.0119	2.7682	1.7713	1.8812	2.5095	-0.4588	4.2129	-1.7573	-1.6864	0.8453	2.2279	1.1843	0.0452	1.5439	0.5823	0.0696	2.2804	-3.0988	-1.9026	2.0197	2.7757	-0.3651	0.7944	1.1253	-2.4675	-1.053	1.2506	2.021	0.1358	-2.6165	2.6816	0.9033
P02743	APCS	Inflammation_II	-1.0001	0.0328	-0.3216	0.1568	0.194	-0.4977	-1.1065	1.2493	0.6708	-1.3257	0.5386	0.0945	0.2912	0.1102	0.4439	0.3379	-0.1137	0.4324	-0.2027	0.7215	-0.1391	-0.5589	0.9547	0.4043	0.7048	-0.3546	0.6391	0.4209	0.7886	0.0006	0.3029	-0.9289	-0.1413	-0.7781	0.4135	0.4387	0.1286	-0.0006	-0.5358	-0.9446	0.6364	0.1781	-0.2588	0.6288	0.5806	-0.6228	0.4429
P02745	C1QA	Inflammation	-0.1921	-0.4069	-0.0381	-0.0296	-0.3471	0.5978	0.0738	0.1144	0.2131	0.439	0.0182	0.1981	0.0108	0.5631	-0.4468	-0.1047	-0.0768	-0.2226	0.3357	-0.0529	0.0166	0.0656	0.4932	-0.4771	-0.2086	0.4658	0.1743	-0.1651	0.4082	0.2511	0.2399	0.0559	0.0013	0.0978	0.6006	0.2554	0.3305	0.0125	-0.0052	-0.2244	-0.543	0.2149	-0.0467	0.2759	0.3877	0.1709	-0.2108
P02748	C9	Inflammation_II	-1.0235	-0.9861	-0.9097	-0.3324	-0.5368	-0.2569	-0.8869	0.3158	0.3432	-0.4579	0.2105	0.2982	0.7691	0.13	0.0855	0.2948	-0.711	0.3042	0.8628	0.0834	-0.2162	0.0794	0.2324	-0.2178	0.6024	0.1873	0.7605	0.0171	0.2326	-0.4947	0.5752	-0.7638	-0.4344	-0.8417	-0.8803	0.5486	0.0399	-0.5531	0.1176	-0.6025	0.3867	0.564	-0.354	0.9146	0.3767	-0.3155	0.2258
P02749	APOH	Neurology	-0.345	0.1696	0.0349	-0.3411	0.7495	0.5573	1.4155	0.4607	0.3931	-0.8639	-0.186	-0.3428	-0.2219	-0.3331	0.9924	-0.3125	0.2765	0.0729	0.4235	0.9179	-0.1369	-0.3921	0.4289	-0.3492	1.5703	0.7773	0.8624	-0.5449	0.7727	0.6137	-0.1575	-0.1971	-0.0893	-0.6119	0.377	1.0597	0.4122	-0.8344	0.3593	-0.1428	0.1096	-0.1697	0.0048	0.3436	1.2151	-0.0841	0.0261
P02750	LRG1	Inflammation_II	-1.5293	-0.2216	-0.2793	-0.9	-0.1178	-0.5545	-0.6113	0.5353	0.5179	-0.0112	0.5249	0.6254	1.3211	0.3454	0.8519	0.1033	-0.9283	0.1493	0.767	0.4334	-0.2854	0.9528	0.011	0.0604	0.7085	0.98	1.0551	0.8798	0.8104	0.3	0.3911	0.7244	-0.4174	-0.5155	0.4707	1.2209	-0.241	-0.1834	-0.6357	-0.7942	0.4236	0.6934	-0.0548	1.5467	2.0128	-0.1323	-0.011
P02751	FN1	Inflammation_II	0.104	0.6195	-0.4062	-0.0003	-0.5616	-0.121	-0.1695	0.3621	0.1209	-0.304	-0.0429	0.2686	-0.7844	0.0993	0.4493	-0.0523	0.337	-0.2886	-0.2845	0.2833	0.282	-0.5729	0.1104	-0.5497	0.2463	0.0068	0.2579	0.211	-0.0182	0.1732	-0.0944	-0.8262	-0.2184	-0.8344	0.6171	0.4568	0.3244	0.846	-0.3657	-0.6186	0.1008	0.0003	-0.2958	-0.3706	0.0433	-0.0165	-0.1167
P02760	AMBP	Oncology	-0.2456	0.0136	0.0237	0.0046	0.212	0.0283	0.2807	0.3466	-0.153	-0.1081	0.1921	0.2821	0.045	0.0549	-0.0665	0.0054	-0.0968	-0.1342	-0.101	-0.0281	-0.013	0.0722	0.0469	-0.2372	0.2449	0.4933	0.0682	0.297	0.0618	0.2434	0.0014	-0.1246	-0.3179	0.3329	0.0366	-0.4541	-0.0452	-0.0014	-0.0587	-0.1955	0.1019	0.0044	-0.0911	0.0848	0.2264	0.0026	-0.0321
P02763	ORM1	Inflammation_II	-0.8288	-0.2117	-0.3875	-0.8049	-0.2919	-0.4827	0.3004	0.0062	0.895	-0.1121	0.7283	0.2157	0.6376	0.3589	0.6795	0.2181	-0.2391	0.4547	0.6485	0.7162	-0.6676	0.3972	0.0352	-0.0062	0.3999	0.8222	0.881	0.7363	0.5171	-0.059	0.5059	0.7774	0.0924	-0.4868	0.4937	0.1356	-0.0487	-0.0903	-0.2719	-1.0764	0.3848	0.1859	-0.0586	1.2796	0.7065	-0.1193	0.4021
P02765	AHSG	Inflammation_II	-0.1006	0.0489	-0.0082	0.5146	-0.1548	-0.1451	-0.0124	-0.5293	-0.1192	-0.0521	0.1637	0.1572	-0.6484	-0.1433	-0.2945	0.2512	-0.0925	-0.2906	-0.8654	-0.0469	0.5529	-0.6251	-0.0992	-0.2654	0.2911	-0.2143	0.0137	-0.1361	0.3488	0.0192	-0.2902	-0.825	0.2682	-0.4102	0.0935	0.3205	0.0676	-0.3199	0.3214	-0.1845	-0.1945	0.0096	0.0414	-0.2309	-0.064	-0.4552	0.0027
P02766	TTR	Inflammation_II	0.1416	0.7346	0.5975	0.108	0.5667	-0.063	0.3588	0.7395	-0.5517	0.017	0.157	0.282	-0.9898	-0.5649	-0.6656	0.3215	0.1558	-0.5205	-2.1125	-0.2492	-0.1758	-1.9983	1.2848	-0.3957	0.6832	-0.3847	-0.5695	-0.6291	0.3402	0.4803	-0.477	0.1277	0.0124	-0.0737	-0.5335	-0.6488	0.3608	0.4351	-0.1047	0.1479	0.017	0.0216	-0.3967	-0.0821	-1.184	-0.0653	-0.2572
P02771	AFP	Neurology	0.8323	-0.037	0.3005	0.5299	0.7325	-1.2849	0.4009	0.1289	0.2204	0.5641	0.0008	0.4017	-0.6735	0.1227	-0.1016	0.4	-0.0401	-0.6885	-0.4812	0.5074	0.3618	-0.3157	-1.0225	1.2501	0.7055	-1.2501	-0.2236	-1.277	-0.1698	-0.9764	-0.2928	0.9495	0.2819	-0.4071	-0.3217	0.0252	0.7107	1.4427	-0.3455	-0.8614	-0.5172	-0.3386	0.4998	-0.5466	-0.9967	0.3621	-1.5103
P02774	GC	Inflammation_II	-0.3144	-0.0728	0.1882	0.5855	0.6298	-0.2541	0.4031	-0.3907	-0.3294	-0.1748	0.0517	0.1901	-0.31	0.3387	-0.31	0.4938	-0.3929	0.3715	-0.5834	-0.2077	0.5189	-0.2638	-1.8103	-0.2072	0.3856	0.2353	0.07	0.7379	0.6762	-0.1094	0.2564	-0.243	-0.5708	0.1208	0.4144	0.1096	0.3889	0.2414	0.2602	-0.5106	0.3456	0.0896	-0.2735	0.0051	-0.0249	0.3164	0.4168
P02775	PPBP	Inflammation_II	1.949	1.2444	-1.4237	-0.1909	0.212	0.0821	-2.7011	1.0561	0.158	-2.1881	-1.2829	1.7605	-1.8441	-1.4679	-0.1772	-2.4107	-1.3367	-1.1771	1.2442	-2.0903	0.2728	0.2545	-0.5067	0.1297	-1.8037	-1.2991	-0.1137	-0.2185	0.2771	-0.0067	-0.1021	-2.6413	-0.3564	0.3774	3.1752	-0.814	0.1356	1.9805	-2.8632	1.2202	1.8584	-2.8957	-0.0519	-1.0476	1.5931	-3.0149	-0.378
P02776	PF4	Inflammation_II	2.0965	1.5368	-1.4371	0.1144	0.2714	0.3845	-1.7286	1.3963	0.0946	-1.9791	-0.8734	2.1463	-1.3368	-1.5012	-0.1367	-2.5968	-1.8517	-1.0976	1.9186	-1.5744	0.5708	0.5808	-0.8105	-0.942	-1.1478	-0.9726	-0.2394	0.0223	0.445	0.0754	-0.5903	-1.8854	-0.1848	0.6417	3.4987	-0.3394	0.8127	2.1371	-1.1249	1.6079	2.8145	-1.6693	-0.654	-0.6674	1.5787	-1.5825	-0.3568
P02778	CXCL10	Inflammation	-1.0848	0.6017	0.279	-1.5374	-0.1353	1.3209	-0.4094	0.2164	0.0655	0.2094	-0.2211	0.6629	0.9999	-0.154	-1.5116	-0.7509	0.6423	-1.5747	0.9551	-0.5247	0.4372	0.7074	0.476	-0.6952	0.7723	1.2092	0.1336	1.2701	1.9386	-0.5826	1.1538	-0.8483	0.2251	-0.3894	0.9528	0.6884	-0.0744	0.0251	-0.5004	-0.5549	-0.2952	-0.42	-0.2993	-0.1284	1.6001	0.5558	-1.6627
P02786	TFRC	Cardiometabolic	-0.5051	-0.1952	0.0272	-0.225	0.1566	0.5849	-0.5637	0.3814	0.3641	0.567	-0.0061	-0.3014	-0.1742	0.2856	-0.4085	0.205	-0.5938	-0.0592	1.1607	0.2399	-0.032	0.7324	-0.2187	-0.1753	0.446	1.3583	0.7648	0.8355	0.5765	0.1808	0.9156	0.1448	0.4955	-0.4695	0.8535	1.3365	0.2755	-0.3833	-0.0628	-0.3397	-0.1134	1.0747	0.1164	0.0061	0.5816	-0.7489	-1.0234
P02787	TF	Inflammation_II	-0.298	0.6156	-0.0188	0.2399	0.3039	0.1712	0.2309	-0.0104	0.0797	0.5581	-0.0319	0.8798	-0.3941	0.0332	-0.5226	0.3519	0.0684	-0.0674	-1.0169	0.2872	0.0571	-0.3563	0.302	-0.0142	0.7238	-0.729	-0.4666	-0.2476	0.6696	-0.2726	-0.1564	-0.3216	0.2985	-0.5631	0.1862	-0.3146	0.6171	-0.0108	0.0873	-0.1604	-0.1758	0.3979	-0.0798	-0.3426	0.1995	0.148	-0.1887
P02818	BGLAP	Cardiometabolic_II	-0.2404	0.0812	-0.0677	-0.7963	0.0908	-1.19	2.0883	-0.2808	-0.0644	1.9695	-0.7027	-0.1057	0.5599	-0.1309	-0.0365	-0.7382	0.0582	-1.4548	1.2485	1.5329	-0.4604	-0.446	0.381	-0.8328	-1.6628	6.6601	0.3473	0.395	3.2118	5.6285	-1.2888	-1.239	0.3576	-1.2887	-1.3631	0.7301	-0.6935	0.9082	0.5583	-0.6419	0.3096	-1.1305	0.104	-0.1984	3.9713	0.5459	1.2475
P03372	ESR1	Inflammation_II	-0.9697	0.2897	-0.0288	-2.0162	-6.4721	1.3407	0.7685	-0.726	-1.0724	-0.6116	0.2013	-6.255	-0.1839	-0.4795	-0.0549	0.1914	-1.4769	-0.8438	-1.2236	-0.7168	0.464	0.3007	-0.5518	-0.3451	-0.3921	0.1803	3.0459	-0.6786	1.1487	0.3014	-1.0822	0.0962	-0.5585	0.9297	0.2502	-1.4287	0.6566	0.7174	-0.4256	-0.7774	-0.1922	-1.9681	0.278	0.016	0.2902	-0.6846	-0.2779
P03950	ANG	Cardiometabolic	-0.0502	0.6676	-0.2563	-0.1055	0.5793	-0.2098	-0.0467	0.2322	-0.1953	-0.1065	0.3072	0.2715	-0.021	0.062	0.7236	-0.0522	-0.7081	-0.1445	-0.5506	0.315	-0.887	0.3291	1.4236	0.0514	0.4196	0.2891	0.5543	0.487	0.5986	0.3689	-0.883	0.5463	-0.2881	-0.0298	0.1201	0.6321	-0.1795	0.0258	0.3832	-0.4506	-0.1445	-0.1295	-0.1705	0.2999	1.3018	0.0034	-0.08
P03951	F11	Inflammation_II	-0.5512	-0.1427	-0.1849	-0.3076	0.1779	-0.143	-0.0854	0.4897	0.4396	0.2072	0.46	-0.1319	-0.1406	0.3338	0.5897	0.1349	0.0275	0.2147	-0.2295	0.5477	-0.0126	-0.2834	1.3384	0.1723	0.4252	-0.3743	0.4757	0.0539	0.4786	-0.0439	-0.2054	-0.5449	-0.1874	-0.3971	0.4901	0.3839	0.1452	0.0219	0.1296	-0.5073	0.3614	-0.0797	-0.8135	0.2317	0.5759	-0.3135	0.3233
P03952	KLKB1	Inflammation_II	-0.2819	0.4518	0.017	0.1042	0.3292	-0.3589	0.213	0.3914	-0.0191	0.1381	0.2672	0.311	-0.422	-0.1243	0.2748	-0.1829	-0.2017	0.2042	-0.3836	0.1808	-0.2903	-0.5526	0.4092	-0.2016	0.3106	-0.6669	-0.1885	0.2755	0.6249	0.0812	-0.0123	-0.7039	-0.2382	-0.1109	0.3478	0.2278	0.0863	0.2885	0.2443	-0.5924	-0.2312	-0.3367	-0.5801	0.208	-0.0712	-0.0176	0.2261
P03956	MMP1	Inflammation	-0.0736	-0.7161	-2.8303	-1.165	-0.486	-0.666	0.641	1.7909	0.6816	-0.5619	0.1656	0.7365	-0.1889	-0.3022	0.6853	-0.3947	-1.9072	-0.3667	1.9227	0.0091	-0.9223	2.7445	-0.6887	-1.101	0.1033	-1.2016	0.5314	0.5429	0.7413	-0.1038	-1.1214	0.3947	-0.6236	0.8265	2.4796	0.1321	0.9182	-0.1625	-1.6371	0.3278	1.2142	-0.9699	-2.1025	0.7428	2.4792	-0.7058	0.1801
P04040	CAT	Inflammation_II	0.5249	0.4002	-0.0372	0.2081	-0.6557	0.7413	-0.7072	-0.5604	0.7047	-0.4032	-0.1724	-0.6133	-0.9244	-0.4688	0.5858	0.5303	0.1558	-0.4514	2.0889	0.6943	-0.5315	-0.0279	0.0307	0.5394	0.1085	-0.1493	-0.6186	-0.2756	1.0091	1.4525	1.134	-0.1996	-0.45	-0.3323	-0.2793	0.9146	1.5748	-0.2989	-0.3588	-1.2664	1.2632	-0.6637	1.0238	0.0503	-0.5179	0.6556	-0.2758
P04054	PLA2G1B	Cardiometabolic	-0.7023	-0.2147	-0.3879	-1.1332	0.3848	0.4551	0.6214	-1.0794	-0.5711	-0.7382	0.6061	-0.4164	0.5252	0.0302	0.5301	1.2938	-0.4689	-0.1076	-0.5511	0.4791	-0.0985	-1.6889	0.9209	1.093	0.9321	-0.3663	0.5552	-0.0809	0.5067	0.6607	-1.9969	-2.4927	0.1534	-0.6314	0.3019	1.833	0.6608	0.4361	-0.2027	-0.2876	-0.9386	-0.2652	-0.2101	0.3618	0.5138	0.2175	-0.5195
P04062	GBA	Neurology_II	-0.6697	-0.8844	-0.0651	0.0769	0.1701	0.1099	-1.6488	0.0843	0.0123	-1.3754	-0.3213	0.118	-1.1216	-0.1127	0.2541	-0.5354	-0.5167	-1.2525	0.3166	-0.0766	-0.059	0.1927	-1.7318	-0.8118	-0.0123	0.0701	0.7116	1.6391	0.4447	0.3616	0.1099	-0.5796	-0.5251	-0.1773	-1.1408	1.1221	-0.3462	0.2506	0.6406	-1.1141	-0.3268	0.5129	0.2025	1.6872	1.2121	-1.0955	-0.3521
P04066	FUCA1	Cardiometabolic	-0.4953	1.0727	-0.5556	0.8787	0.4552	0.276	-0.418	0.6836	-0.6456	0.784	-1.5236	0.7324	-1.4619	0.066	0.359	0.529	-0.4266	-1.8435	-0.4752	-0.605	-0.0025	-0.8683	-0.1612	0.3393	0.3765	-0.3393	-0.9238	-1.4465	0.7346	0.0881	-2.3323	1.0524	-0.6535	-0.534	0.473	0.0025	0.6651	-3.3037	0.249	-1.5089	0.413	-0.2874	0.8654	-0.4518	-0.5027	0.2727	0.2079
P04070	PROC	Cardiometabolic	-0.4413	0.7884	0.1355	-0.1531	0.0772	-0.4076	0.1978	-0.2595	-0.2478	0.4239	0.347	0.4887	-0.3065	-0.0109	-0.3758	-0.0071	-0.0953	-0.3647	0.126	0.3416	-0.0103	-0.5126	0.127	-0.0382	0.1073	-0.8896	-0.2882	0.4177	0.1676	-0.2653	-0.0057	0.4444	-0.4397	-0.3421	0.3789	0.995	0.0283	0.0331	0.1154	-0.3361	0.0183	-0.0317	0.3969	0.1393	0.284	-0.3118	0.1224
P04080	CSTB	Cardiometabolic	-0.3894	0.1884	0.2171	-0.4597	-0.525	0.0462	-0.9577	0.0971	-0.1545	-0.3454	-0.1648	-0.198	0.232	0.5977	-0.1436	-0.6724	0.2209	-0.4392	2.0213	0.1936	-0.3544	1.9572	-0.0812	0.2195	0.4396	2.0266	1.042	0.5717	1.343	2.4637	0.7403	0.2118	-0.8737	-0.144	0.0816	1.4082	1.0422	-0.086	-0.2015	-1.1994	-0.0574	-0.1421	0.1723	0.3163	1.4431	-0.2529	-0.1398
P04083	ANXA1	Inflammation_II	0.6817	-0.2412	0.1147	-0.2073	-0.0215	0.1079	-0.3218	-0.3054	0.0638	-0.3403	0.1516	-0.1439	0.0128	0.06	-0.496	4.2745	-0.1195	-0.2946	0.2809	0.0758	-0.0716	0.2204	-0.4857	0.2124	0.2351	0.1435	0.032	-0.1928	0.1947	0.4358	2.0437	-0.1862	-0.2494	-0.502	-0.077	0.0382	0.528	0.2741	-0.4332	-0.3461	0.2307	-0.2454	-0.0271	0.018	-0.0726	-0.0277	-0.258
P04085	PDGFA	Cardiometabolic	1.2008	1.5396	-0.5973	-0.0796	0.0398	0.1246	-1.4542	0.6412	0.372	-1.2457	-0.5486	1.4466	-1.3628	-1.1955	0.0022	-1.3583	-0.3046	-0.7496	1.2	-1.0037	-0.3714	0.3696	-0.9327	0.2436	-0.9621	-0.7851	-0.3587	-0.0358	0.6275	-0.0314	-0.2577	-1.527	-0.5282	0.3197	3.2277	-0.0022	0.3562	1.0187	-1.3256	0.7968	1.8622	-1.6306	0.2088	-0.6933	1.2949	-1.5184	-0.097
P04090	RLN2	Inflammation_II	-0.4032	-0.0496	0.0631	-0.1304	0.562	-0.3863	-0.4856	1.3358	0.1174	1.023	-0.518	-0.1939	-0.7147	1.7201	-0.6361	0.2621	-0.1502	-1.0682	0.1775	-1.0831	-0.5229	0.7046	0.4612	-0.4416	0.4228	1.0702	0.1514	0.0863	0.4991	0.9368	0.6048	-0.4263	-0.1964	-1.0675	-0.0922	1.4366	0.9898	0.1921	-1.1261	-0.1105	0.003	0.4571	-0.0091	-0.1851	0.7636	0.249	-0.7399
P04114	APOB	Inflammation_II	-0.2021	0.1479	-0.1967	0.3924	0.1288	-0.4712	0.0701	-0.0101	0.4849	-0.1377	-0.85	-0.4139	0.003	0.2675	-0.0836	-0.9335	-0.1437	-0.5123	0.4994	0.1978	0.8381	-0.6495	-0.003	-0.1936	0.2752	-0.5305	-0.4061	0.033	0.0758	-0.247	0.1799	-2.0779	-0.1883	-0.3813	0.1216	1.1406	0.1983	-0.814	0.0509	-0.4999	0.022	-0.2354	0.4336	-0.1136	0.2757	1.2215	0.2104
P04118	CLPS	Neurology	-0.4445	0.3341	-0.2932	-0.963	0.4863	0.2284	0.3371	-0.748	-0.7346	-0.1328	-0.1238	-0.6356	0.3891	0.8247	-1.4016	0.5071	-1.3787	-0.2622	0.1801	0.381	-1.2512	0.151	1.0287	-0.2296	0.2604	-0.685	0.3	0.437	1.6876	1.4287	-2.8978	-2.3034	-0.2914	-0.7995	1.5262	2.2872	1.6095	1.6966	1.1268	-1.4245	-0.0634	-0.2415	0.8422	0.199	0.39	-1.3308	-1.1029
P04141	CSF2	Cardiometabolic_II	-0.5934	-0.4164	-0.1874	-0.4379	0.2505	0.101	-0.1814	0.6537	-0.2672	0.2849	-1.278	-0.2183	0.8624	-0.61	-0.4283	-0.6509	-0.0734	-0.0318	1.8955	-0.358	0.467	0.7495	-0.8127	0.4721	0.037	0.2058	-0.3116	1.9055	0.0317	-0.3656	0.1246	0.2798	0.0304	-0.3643	1.0041	0.1746	-0.2765	-0.2043	0.0191	-1.7008	-0.6571	0.4434	-0.0519	0.8612	0.0925	0.6866	-0.5984
P04155	TFF1	Neurology	-1.5394	-0.9167	-0.6206	-0.5169	0.2354	0.6234	0.2225	-1.5276	-1.0151	0.6755	0.6855	0.8333	0.8694	2.7184	-1.09	-0.4546	1.2595	-2.3221	0.292	-0.9517	0.0755	0.3086	-0.152	-1.2919	-1.2483	2.2106	-0.6337	-0.1692	1.0437	4.0516	2.3176	0.989	-1.3685	-0.9786	-0.1703	3.4756	2.0034	-1.5821	2.7002	-0.0146	-0.1041	-1.2154	-1.0949	-0.555	-0.3746	1.4942	-0.9313
P04179	SOD2	Neurology	-0.4174	0.4876	-0.1034	-0.5938	-0.0525	0.1054	-0.0385	0.333	-0.0922	0.6766	0.2619	-0.3182	-0.2629	0.0562	-0.2363	-0.3883	-0.3378	-0.3349	1.6532	-0.2176	-0.2244	-0.5947	-0.441	0.4344	1.0658	-0.1143	1.0307	0.0095	0.5785	0.1186	-0.2782	0.4005	0.1677	-0.595	-0.2669	2.6992	0.1569	0.1165	-0.0629	-0.4438	-0.3056	-0.8203	-0.4979	0.9375	1.4528	-0.0548	0.1476
P04180	LCAT	Inflammation_II	-0.1115	0.1763	0.0976	0.1794	-0.1164	-0.1712	0.0803	-0.2313	0.1861	0.1274	0.0871	0.1533	-0.401	-0.0109	0.0462	0.2466	-0.1043	-0.2681	-0.1731	0.3232	0.2073	-0.6557	0.0472	-0.0076	0.3973	-0.2193	0.1528	-0.1401	0.4125	-0.0799	0.0626	-0.6685	0.0885	-0.355	0.5094	0.359	0.2658	-0.0387	0.2063	-0.3619	-0.1457	0.0614	-0.1658	0.05	-0.0403	-0.1539	0.1143
P04183	TK1	Oncology_II	-0.901	-0.1912	-0.4827	-0.2627	-0.0389	0.6352	-1.4423	-0.4209	0.2784	0.1073	2.0264	-0.7326	-0.3016	-0.2109	-0.1689	-0.8437	0.2394	-0.304	-1.0602	0.1776	-0.7877	0.1697	0.7125	-0.1058	-0.4036	0.2656	1.0654	0.6828	0.0284	0.6474	-0.0574	-1.6754	-1.0762	-1.2479	0.0416	3.6542	0.0374	-0.1559	0.316	-1.4291	-1.6997	0.7018	-0.0837	0.0526	-0.252	0.3568	0.533
P04196	HRG	Inflammation_II	-0.0468	0.0915	0.151	0.2751	0.1467	-0.3421	0.2422	1.4924	-0.1031	0.1725	-0.1855	0.3736	-0.4687	-0.0765	-0.3231	0.2856	-0.1766	-0.4679	-0.939	0.1878	0.0103	-1.1739	0.1445	-0.2748	0.4617	-0.3497	-0.2023	-0.1004	0.8447	0.2491	0.0225	-0.4481	0.129	-0.3294	0.3441	0.0567	0.1287	0.1607	-0.0172	-0.4888	0.1219	0.1026	0.0041	-0.2581	0.0374	0.2078	-0.0861
P04216	THY1	Neurology	-0.5019	-0.0975	0.609	-0.1231	-0.0713	0.355	-0.0012	0.0339	-0.3188	0.2025	-0.0583	-0.0201	0.2644	-0.1023	-0.188	-0.2553	-0.0196	-0.7397	-0.1309	0.4667	-0.1028	0.4827	-0.3494	-0.7293	0.578	1.6224	0.1065	0.1367	1.2299	2.5298	0.4076	-0.072	-0.0954	-0.0842	-0.1736	0.6102	-0.0466	-0.5558	0.1709	0.0687	-0.3467	0.3949	0.2785	-0.0045	0.5781	0.0806	-0.1752
P04217	A1BG	Inflammation_II	-0.2435	0.2632	-0.0917	-0.0552	0.2566	-0.2938	0.2421	0.2288	0.2073	-0.0348	0.1101	0.2445	-0.0276	0.192	-0.1059	-0.0967	-0.3665	-0.0809	-0.635	0.3501	0.4243	-0.1764	-0.1621	0.1472	0.3952	-0.2994	0.2689	0.2476	0.6885	-0.1148	0.3275	-0.0273	-0.1285	-0.228	0.3082	0.5339	0.2235	-0.0403	0.2456	-0.4065	0.0624	0.4203	-0.1227	0.0882	0.5247	0.3034	-0.0089
P04233	CD74	Neurology	-1.2096	-0.4271	0.0173	-0.3729	0.0966	0.0944	0.0825	0.0179	-0.6495	0.1157	-0.3509	0.3677	0.1217	0.0018	-0.4958	-0.0408	0.0765	-1.2096	0.4555	-0.2566	-0.0483	0.8649	0.1322	-1.3983	0.3712	1.2129	0.2956	-0.0018	0.833	1.1248	0.2563	0.3597	-0.522	0.2403	0.182	0.6313	-0.005	-0.6359	-0.2337	-0.5597	-0.4903	-0.2626	0.3738	-0.0216	0.6805	-0.0858	-0.6368
P04234	CD3D	Neurology_II	-0.3653	0.5315	0.9302	-0.2645	-0.0409	-0.8804	-0.4903	1.4225	-0.7018	0.7713	-0.4373	-0.3787	-0.4916	-0.3243	0.1858	-0.3321	-0.3013	-0.06	0.769	0.0436	-0.15	0.1876	0.1875	0.4701	-0.3155	0.1402	-0.2886	-0.2374	0.6002	0.0725	0.5182	0.1597	2.0953	-0.6504	-0.6364	0.3876	-0.3014	-1.9278	1.5237	-0.7514	-0.4667	0.8576	0.1003	0.7425	0.9063	0.2809	-0.7164
P04275	VWF	Cardiometabolic	-0.8572	1.8638	-2.328	-0.5067	-1.662	-0.8893	-1.6102	1.1087	0.4773	-1.0544	0.9787	1.4685	-1.0048	-0.0078	0.8871	-0.2649	0.5998	-0.5119	1.4846	1.0549	-0.7501	-0.1745	1.0705	0.5467	0.6778	-0.0697	1.0531	0.8831	-0.0719	0.4726	0.1925	-2.0825	-2.1077	-1.8242	1.0078	2.0125	0.8903	0.5946	-0.4119	-0.9801	-0.8859	-1.2281	-0.5516	-0.7952	1.6115	0.2916	-0.7606
P04278	SHBG	Inflammation_II	0.1976	0.4431	0.4506	0.3323	0.4553	-0.0409	-0.4191	-0.0224	-1.1368	-0.0663	-0.5815	0.9655	0.2214	0.0471	-1.0467	0.2437	-0.038	-0.3163	1.0094	-0.4167	1.3313	-0.3648	-0.0309	-0.4786	0.0515	-0.4038	-0.8117	-0.1589	-0.2694	0.8926	0.089	0.3661	-0.9429	0.048	-0.886	1.1156	-0.9222	-0.3609	-0.3768	-0.4743	-0.2893	0.0828	0.597	-0.5485	-0.0603	0.5209	-0.5346
P04406	GAPDH	Inflammation_II	-0.0363	0.2508	-0.6527	0.3121	-0.3256	0.1437	-0.8805	0.958	0.5025	0.0544	-0.8942	0.3544	-0.3151	-0.1047	-0.2063	-0.2355	-0.4368	-0.2086	0.982	-0.2429	-1.697	-0.3491	0.7139	-0.0092	0.1139	0.4935	-0.8063	-0.0369	0.841	0.9378	0.7711	-1.2536	0.0417	-1.0327	0.9606	1.1116	0.8254	1.2514	-0.1331	-1.1776	0.9379	-1.4446	-0.0235	0.1917	0.8118	0.123	-0.1642
P04439	HLA-A	Neurology_II	-0.4963	-0.0626	1.0428	-1.021	0.6653	-0.3271	-0.0484	0.4622	-0.5227	-0.0046	0.1854	-0.1501	0.9777	-0.2294	0.0117	-0.144	-0.8384	-1.119	0.6191	-0.6416	0.0046	1.1515	0.0798	0.1314	-0.3564	0.8301	-0.3754	0.1889	1.2393	0.9024	0.3732	1.4147	-0.4474	-0.3515	-0.4111	0.7689	0.3887	-0.0725	0.0358	-0.4554	-0.6062	-0.2181	-0.1593	-0.5175	0.3702	0.6016	-0.2735
P04626	ERBB2	Oncology	-0.0955	1.0609	0.1958	-0.1204	0.4161	-0.1442	-0.0018	0.0965	0.1044	0.3244	-0.2435	0.2534	-0.3641	-0.1584	-0.0917	-0.2224	-0.3374	-0.2194	-0.1069	0.8569	-0.2331	-0.2039	-0.6027	-0.0548	0.6481	-0.7199	0.002	0.1079	0.5242	-0.0326	-0.128	0.2575	0.0733	-0.2803	-0.2138	-0.1151	0.3014	-0.2136	0.3494	0.0018	-0.3119	-0.3774	0.4988	-0.362	-0.0138	0.031	0.1223
P04637	TP53	Oncology	-0.2868	-1.845	-0.4493	-0.3835	-2.182	0.3306	-0.7326	0.6309	-0.1415	-0.178	-0.1491	0.0678	0.6121	0.4323	-1.0033	0.6778	-0.4154	0.1868	3.4467	-1.1891	-1.5337	0.2425	1.1143	-0.9792	0.2527	-0.9022	0.765	-0.2017	0.9558	-0.0161	0.5522	-0.4329	-0.1898	0.6771	-0.374	3.6072	-0.7853	0.6403	0.3442	-0.7924	-1.5337	0.9727	-0.9195	0.4301	1.3399	0.4584	0.4222
P04746	AMY2A	Cardiometabolic	-0.7522	0.623	-0.1847	0.0479	0.2754	0.1426	-0.172	-0.7738	-0.1119	-0.4906	0.043	0.3041	2.4703	0.3119	-0.7695	0.7638	-0.3939	0.1251	-1.01	0.0259	-0.106	-1.2638	0.5748	0.4527	0.4336	-0.3329	-0.4702	-0.3536	0.2414	0.1984	-0.3075	-2.1581	0.6501	-0.5031	0.5481	1.2211	0.3735	0.1171	0.1515	-0.3569	-0.4715	-0.4483	0.6105	-0.3628	1.8642	0.2115	-0.0253
P04792	HSPB1	Cardiometabolic	2.0068	1.4541	-1.3929	0.8631	0.9726	0.9049	-1.483	2.0979	-0.1874	-1.4995	-0.7832	0.283	-0.09	-0.8582	-0.4554	-0.7703	-2.431	-0.0281	2.0295	0.5459	-1.9147	2.1665	-0.8865	-0.8212	-0.2259	0.1553	0.4297	0.7254	1.7084	0.1202	0.4303	-0.4219	0.0469	-0.4801	1.9921	1.041	-0.3883	2.9825	-0.8584	1.2933	-0.321	-0.0533	-0.169	0.2277	2.5369	-0.9946	-0.7762
P04808	RLN1	Neurology_II	0.4002	0.1389	-0.3233	2.0058	1.2044	-0.4595	-0.4369	1.7415	-0.2519	-0.324	-0.1714	-0.3692	-0.632	2.2659	0.3618	-0.3798	-0.2852	0.2555	0.0987	-0.3269	0.3689	3.2083	-0.5026	-0.358	-0.0412	0.1851	-0.0939	-0.0895	0.5608	-0.092	-0.2912	4.5719	-0.2863	-0.4728	-0.5512	1.5315	0.3522	-0.2631	0.117	-0.5187	-0.3825	0.1929	-0.7717	0.1088	0.0412	0.0581	0.0698
P05000	IFNW1	Cardiometabolic_II	0.05	0.8147	0.096	-0.1592	-0.0676	-0.2781	-0.7907	-0.3982	0.7805	-0.6237	0.2535	-0.5416	-0.5395	0.0604	1.3346	0.0539	0.3427	0.82	-0.0791	0.3014	-0.093	-0.2825	1.2635	0.6105	-0.1733	-0.091	-0.5126	0.9314	0.3604	-0.2718	0.4425	1.8982	-0.3946	-0.3759	-0.7842	-0.088	0.1374	0.1558	0.4215	0.97	-0.0792	-0.0336	0.1879	-0.4409	0.5317	0.1525	-0.3346
P05026	ATP1B1	Cardiometabolic_II	0.4533	-0.271	0.3142	-0.7163	-0.0542	-0.4711	-0.5604	0.1845	-0.1529	-0.0486	-0.1356	-0.2899	1.9261	0.8276	-0.2011	0.3481	0.0812	0.1808	0.8552	-0.8268	-0.0308	-0.5226	0.3222	-0.2837	0.1547	-0.5216	0.0981	-0.5178	0.2835	0.2355	0.4516	0.8543	0.5954	-0.6232	-0.4575	0.4573	-1.1241	-0.4922	-0.1606	-0.1906	-0.1108	-0.1793	0.2825	0.1122	0.1301	0.3364	-0.006
P05060	CHGB	Neurology	-0.4485	-0.9244	-0.1878	-0.0014	0.6899	0.2215	0.2341	-0.1698	-0.3247	-0.4952	0.4414	1.1143	-0.0023	0.2462	-0.2184	-0.5909	-0.3363	-0.9681	1.1509	-0.2393	-0.4663	0.9852	0.2768	-0.9265	1.0146	2.1704	0.3233	0.3983	0.762	2.9451	0.0385	0.9154	-0.5004	0.0365	-0.4133	3.7869	-0.2851	-0.5316	-0.1784	-0.3305	0.2534	0.1413	-0.0389	-0.2028	0.6555	-0.0635	-0.9115
P05067	APP	Neurology	0.3442	0.2691	-0.1646	-0.1513	-0.2544	-0.0435	-0.3208	0.0669	-0.1199	-0.4399	-0.3102	0.6212	-0.1715	-0.3302	-0.1716	-0.2889	-0.4864	-0.4553	1.1437	-0.1745	0.17	0.264	-0.5898	-0.0305	-0.2998	0.1029	0.0403	-0.0041	0.4326	0.4913	-0.2643	-0.0971	-0.0329	0.0912	1.758	1.5905	0.0982	0.475	-0.2206	0.2081	0.8148	-0.4842	-0.2128	-0.3004	0.873	-0.5994	-0.5081
P05089	ARG1	Oncology	0.1706	-0.1807	0.0126	0.1219	-0.2681	0.7904	-0.651	-0.3714	0.3254	-0.9661	0.3138	-0.6083	-0.7917	-0.4008	0.8248	0.5075	0.1942	-0.0962	1.1717	0.5334	0.1667	-0.8485	-0.1017	0.1665	-0.2083	0.3629	-1.0465	0.1153	0.6803	1.3293	1.2636	0.6851	-0.5099	0.056	-0.6893	0.2102	0.6898	-0.6331	-0.4424	-1.8732	1.0456	-0.2578	1.1468	0.1205	-1.5219	0.4672	0.0494
P05090	APOD	Inflammation_II	-0.2336	0.4688	0.1484	0.2549	1.1741	-0.2969	-0.8479	-0.1941	0.0098	-0.5692	-0.3825	0.2739	0.634	-0.2827	-0.1425	-0.061	0.1618	-0.3493	-0.0981	0.1907	-0.2103	-0.3265	2.0514	-0.6348	0.7014	0.3232	0.031	-0.1135	0.4997	-0.0989	-0.2061	0.2993	-0.0535	-0.1318	-0.8701	-0.5712	-0.1421	0.1659	-0.5694	-0.397	0.1652	-0.6573	-0.0785	0.1004	-0.0209	-0.214	-0.2948
P05091	ALDH2	Oncology_II	-0.4194	0.3669	0.4715	0.4945	0.6691	-0.352	-0.2681	-0.3067	-0.2508	1.0977	-0.2504	-0.9126	-0.4725	-0.4083	0.7092	-0.267	-0.0165	-0.3143	0.65	-0.4461	0.8663	0.3073	0.1612	-0.512	0.737	-0.0299	-0.598	-0.0048	0.3533	-0.3024	0.2213	0.6889	0.7374	-0.3814	-0.2567	2.2932	-0.1856	0.2394	1.1856	0.9391	-0.1502	-0.2652	0.4365	0.8281	0.1242	-0.453	0.3576
P05107	ITGB2	Cardiometabolic	-0.1016	0.5992	0.4257	0.4611	0.4789	0.2162	-0.3284	-0.3891	-0.0148	-0.0951	0.4429	-0.2502	-0.2933	0.0474	-0.6509	-0.2605	-0.2096	-0.4868	-0.5843	0.1965	0.1653	0.0849	-0.3835	-0.9965	0.3953	-0.2076	-0.1878	0.1197	0.7725	-0.1098	0.3532	0.3974	0.202	0.1096	0.2098	-0.0387	0.4918	-0.6455	0.4282	-0.1459	-0.4069	-0.443	0.0947	-0.4894	0.1649	-0.4253	-0.571
P05112	IL4	Inflammation	-0.2481	-0.3436	-0.9391	-4.9444	-0.4785	-0.0014	-4.4303	0.8017	-0.8078	-1.202	0.1107	-1.4193	0.0711	0.1824	-5.6933	-5.384	0.2168	-0.7079	1.9864	0.477	-5.2649	-0.0328	0.2539	-1.2745	-5.1208	0.5795	0.6979	0.0014	-5.1672	-1.9093	0.749	1.1171	-0.0143	0.2176	0.5523	-1.1013	1.9749	-1.1816	0.8526	0.9378	-0.3657	-0.4594	-0.6667	0.7524	-0.572	-0.2029	0.952
P05113	IL5	Inflammation	2.4073	-0.6277	-0.7263	1.1407	-1.7497	1.0074	-0.6822	1.3569	-0.4921	0.509	-1.7396	-0.2311	0.1074	-0.6563	-0.1634	-0.5861	-2.283	0.2337	0.0186	-2.392	-1.1797	-1.6832	0.0466	0.1826	0.5888	2.9238	-0.8773	1.2121	0.5553	-0.0872	-1.2951	-1.1467	-0.1695	-0.522	-0.0089	-2.1861	2.7857	5.6761	1.5415	-0.3928	-0.1676	-0.2696	0.9231	1.8051	2.5283	0.8242	0.3212
P05121	SERPINE1	Cardiometabolic	0.7179	2.822	0.6432	-0.3663	-0.956	-0.5159	-1.2301	-0.0886	0.0165	-0.4416	-1.0553	1.0453	-1.8508	1.2549	0.0943	-0.991	-0.7388	-1.5018	1.3028	0.1102	-0.6016	0.2209	-0.9092	-0.4989	-0.4276	-1.8936	-0.0246	0.0828	0.0653	0.0115	-0.7179	-1.4028	-0.3423	-0.224	2.7354	0.9026	0.9427	0.6439	-0.2931	0.7954	1.1227	-2.118	0.2486	-0.8028	1.1672	-1.7279	-0.8232
P05154	SERPINA5	Inflammation_II	0.0562	0.8147	0.5497	0.161	0.3511	0.0593	0.0478	0.6062	0.587	0.2412	-0.1075	-0.3264	-0.8096	-0.2449	-0.0924	-0.0114	-0.157	-0.3684	-1.7528	-0.0247	1.0585	-2.1018	2.1165	-0.4279	0.2566	0.0198	-0.2435	-0.4156	0.9165	0.2436	0.0169	-0.8934	-0.0418	-0.0181	0.0252	-0.0092	0.3079	0.0317	0.1835	-0.2106	0.0206	-0.2449	-0.1409	-0.4715	-0.9738	-0.2529	0.2724
P05155	SERPING1	Inflammation_II	-0.6424	-0.0829	-0.2322	-0.2013	0.3667	-0.3286	-0.2275	-0.3144	0.1449	-0.152	0.0655	0.4048	-0.0344	0.1922	-0.1801	0.0441	-0.1814	0.0017	0.0635	0.2768	0.1233	-0.2187	-0.8776	0.1326	0.3478	-0.15	0.2093	0.3404	0.2738	-0.1147	0.0105	0.3531	-0.354	-0.3085	0.2702	0.3779	-0.3229	0.0399	0.0143	-0.5712	0.0759	0.0625	-0.2296	0.3007	0.2239	0.1015	-0.038
P05156	CFI	Inflammation_II	-0.4714	-0.1353	-0.2573	-0.0673	-0.1031	-0.4873	-0.1461	0.7931	0.3277	-0.0864	0.1834	0.2843	0.2468	0.021	0.1109	0.0914	-0.2272	0.1589	-0.0654	0.3551	0.0314	-0.1272	0.2731	-0.1275	0.3753	0.0489	0.3025	0.1933	0.3077	0.0024	0.2173	-0.3219	0.0136	-0.4638	0.4849	0.6933	0.0639	-0.3352	0.2856	-0.4925	0.2973	0.2137	-0.6927	0.348	0.6568	-0.455	-0.0024
P05160	F13B	Inflammation_II	-0.2839	-0.099	0.1414	-0.1793	0.5082	-0.6188	-0.2571	0.9832	0.274	-0.1505	0.6449	-0.1191	-0.5161	0.1631	0.6343	0.5063	-0.2664	-0.0162	-0.7823	0.5986	-0.4234	-1.0382	0.1132	-0.6609	1.4998	-0.2647	-0.4979	0.0616	0.4852	0.5578	0.0433	-0.1769	-0.4487	-0.4427	0.6647	0.3437	0.1327	0.1794	-0.0498	-0.0321	-0.0639	-0.8784	-0.9042	-0.0056	0.1987	0.2551	0.02
P05164	MPO	Neurology	-0.2764	-0.1637	-0.108	-0.4216	0.0509	0.0798	-0.5363	-0.2342	-0.0387	-0.4863	0.0679	0.3824	-0.0984	-0.1524	1.134	-0.415	0.2125	-0.4122	1.2591	-0.1131	0.289	0.4563	-0.7004	1.4565	-0.3068	-0.3601	0.4543	0.2007	0.3201	0.6538	1.7377	-0.5277	0.8212	-0.1045	-0.6615	1.3317	0.5016	-0.381	0.0524	-0.6109	0.3845	-0.0406	-0.0111	0.1555	0.8172	-0.1278	0.0841
P05187	ALPP	Oncology	-2.4687	0.4309	-0.0302	-2.5321	3.7118	1.1058	-2.2783	-1.1987	-0.2933	-0.9681	-1.0948	2.1952	2.303	0.5982	-1.2384	1.2884	2.1514	-1.6114	-1.6743	-2.4666	1.066	-0.3526	-1.0413	0.3561	0.367	-0.232	-1.7251	0.6574	0.1785	-0.2178	0.1625	0.3871	-2.0931	-0.364	-2.2612	-0.9181	-0.4343	-1.2212	0.1251	-2.5572	1.7876	-1.874	-1.9351	-1.2168	-1.251	3.4118	0.6739
P05231	IL6	Cardiometabolic	-2.4736	-0.7656	-0.3637	-1.7139	-2.0618	-1.6047	0.3814	1.9846	2.2075	-0.5262	0.0004	0.5335	1.4802	1.1605	1.1381	-0.4742	-1.5067	1.0043	3.0432	3.0863	0.7969	2.4695	-0.261	0.5431	-0.6637	1.5927	1.137	1.9127	0.6618	-0.1391	0.8651	0.2812	0.2224	-1.2334	1.4154	2.1811	-0.6286	-1.9507	-0.3257	-1.9359	1.1324	1.2523	-0.3932	2.3872	2.5884	-1.1214	1.1545
P05231	IL6	Inflammation	-3.3765	-0.6027	-0.4008	-1.4912	-1.7486	-2.0624	0.2021	2.0459	2.2187	-0.7205	0.0449	0.368	1.5991	1.5647	1.2763	-0.639	-1.3638	0.9891	3.1861	3.0949	1.0104	2.6101	-0.1926	0.8932	-0.4778	1.6666	1.0898	1.8224	0.626	-0.2013	1.1771	0.4945	0.1806	-0.9607	1.1654	2.3245	-0.6548	-2.2487	-0.5084	-1.9156	1.0267	1.1904	-0.2322	2.4366	2.5308	-1.5306	1.14
P05231	IL6	Neurology	-3.0245	-0.6579	-0.6066	-1.5602	-1.5198	-1.6764	0.2938	2.1892	2.3133	-0.5401	-0.0635	0.4353	1.5279	1.3018	1.1461	-0.6588	-1.2968	0.9259	3.1163	3.1654	0.3615	2.5642	-0.0869	0.7194	-0.337	1.5581	0.9839	1.7327	0.6609	-0.1313	1.1715	0.3975	-0.0191	-0.9044	1.271	2.3092	-0.225	-1.9099	-0.3181	-2.1679	0.9862	1.5403	-0.4557	2.6507	2.4817	-1.0033	1.3075
P05231	IL6	Oncology	-3.0291	-0.6865	-0.4114	-1.9635	-1.8195	-1.5754	0.4654	2.0243	2.112	-0.7979	-0.1506	0.4427	1.3645	1.2613	1.21	-0.8024	-1.3482	0.6911	3.0735	3.0438	0.4936	2.5728	-0.1237	0.5594	-0.7474	1.4497	0.968	1.6613	0.7748	-0.1056	1.066	0.3456	0.246	-1.0054	1.052	2.0949	-0.5658	-1.9695	-0.3684	-1.9573	1.0171	1.3241	-0.3502	2.3113	2.4359	-1.278	1.15
P05305	EDN1	Cardiometabolic_II	-0.5597	-0.1378	0.6346	-0.3051	0.1643	-0.2208	0.2463	0.0354	-0.3101	0.154	-0.4	0.6474	0.2375	0.2793	-0.1448	-0.0464	-0.2981	-1.006	0.7868	0.2034	-1.3087	0.9277	-0.367	-0.7163	0.2852	0.8833	0.5831	-0.0836	0.7517	1.4301	0.3945	0.0248	-0.5016	0.0823	-0.3092	0.2034	0.3237	-0.237	-0.1544	-0.2567	0.3091	-0.2859	-0.619	0.2554	0.8352	0.2471	-0.0175
P05362	ICAM1	Cardiometabolic	-0.5243	0.1812	-0.1633	-0.5418	0.0147	-0.0232	-0.3506	0.3928	-0.0412	0.2397	-0.0627	0.1537	0.0231	0.001	-0.1643	-0.0576	0.0767	-0.6479	0.6608	0.4046	0.4617	0.843	-0.0657	-0.3408	0.3331	-0.2607	0.5498	0.394	0.6137	-0.5344	0.0151	0.3895	-0.1195	0.1975	-0.2607	1.0373	-0.225	-0.5439	0.2884	-0.9935	0.2082	-0.3673	0.3898	0.1113	0.5972	0.1164	-0.2223
P05412	JUN	Inflammation	-1.2288	-0.1153	-0.4311	-0.0521	-0.3935	-0.2819	-0.7498	0.4489	-0.0132	0.2237	-0.1484	0.1807	0.3128	0.109	-0.3207	0.1273	-0.7123	-0.7823	2.8317	-0.5225	-0.5157	1.5945	-0.3578	0.0765	0.7912	1.1507	1.2158	1.0618	1.5019	1.7536	1.0107	0.2371	-0.185	-0.28	0.0337	3.8926	0.443	-0.2119	-0.5571	-0.9044	-0.5135	-0.2663	-1.0208	1.201	2.1378	0.0104	0.0242
P05413	FABP3	Cardiometabolic_II	-1.0004	1.4432	0.6571	0.2985	0.1455	0.1947	-0.3165	-0.7142	-1.4653	0.0629	-0.5841	-0.1447	0.2792	0.5031	-0.4566	0.1286	-0.7078	-0.3939	2.2239	-0.0587	-1.1451	1.4842	-0.8788	-1.6995	0.9433	2.4152	0.5519	0.2491	1.9223	4.204	0.3354	0.1981	-1.0517	-0.0059	-0.4036	0.8399	1.4974	-0.2966	-0.0854	-0.2697	-0.8562	-0.105	-0.1765	-0.6507	0.3397	-0.1478	-1.055
P05451	REG1A	Cardiometabolic	-1.3239	0.3641	-0.1669	0.1438	0.3727	0.4508	0.0695	-0.9528	-0.7603	-0.7876	0.4331	1.0371	0.4359	-0.2124	0.0359	0.0889	-0.5417	-1.8141	0.1506	-1.0242	-1.5077	0.2313	0.4743	0.0499	1.2466	2.2216	0.0054	-0.2393	-0.3263	3.1301	-0.4887	1.0873	-0.6169	0.0228	0.6356	-0.0019	0.9231	-1.1879	0.1156	-0.4715	0.103	0.8981	-0.5017	-0.5925	0.0019	1.1098	-0.9833
P05452	CLEC3B	Inflammation_II	-0.0353	0.1347	0.2496	0.0377	0.5884	0.0963	0.1103	-0.0683	-0.3452	0.0812	-0.1148	0.0175	-0.3472	-0.1334	-0.1313	0.1267	0.187	-0.1104	-0.887	0.1631	-0.1541	-1.0404	-1.0567	-0.3516	0.3621	-0.1843	-0.2005	-0.7335	0.7452	0.2099	0.1282	-0.0874	0.0054	-0.0309	-0.5762	-0.2525	-0.1139	0.1123	0.0416	-0.0054	0.2649	-0.2923	-0.1995	0.0378	-0.5535	0.1975	0.3278
P05455	SSB	Neurology	0.5038	0.7178	0.0069	-0.3796	-0.3588	0.169	-0.1281	0.066	0.0619	-0.4526	-0.5554	-0.6376	-0.1014	0.1371	-0.0358	-0.5035	0.7641	-0.1965	0.6748	-0.139	0.4428	1.1062	0.0975	1.1464	-0.0234	2.331	-0.3179	0.1128	0.8975	0.4748	0.5926	2.8125	-0.5372	-0.6446	-0.2156	4.7997	0.2729	0.7033	-0.1215	-1.7137	-1.0563	0.3751	1.2152	0.9148	1.6281	0.6759	-0.0069
P05543	SERPINA7	Inflammation_II	-0.3058	0.0019	-0.2934	-0.156	0.0525	-0.4587	-0.2583	0.908	0.3505	0.1766	0.0439	-0.3385	0.0785	0.0535	-0.1995	0.2806	-0.3951	0.1216	-0.5616	0.2152	0.6093	-0.8366	-1.7627	0.0436	0.5318	-0.4433	0.5163	-0.6982	-0.005	0.0534	0.4253	-0.6107	-0.105	-0.814	0.0102	1.0267	0.1262	0.1502	0.1746	-0.5242	0.7729	0.5269	-0.6778	0.1918	0.0771	-0.3423	0.1194
P05546	SERPIND1	Inflammation_II	-0.8483	-0.1879	-0.2286	-0.5899	0.1185	-0.4199	-0.3966	1.3075	0.3292	0.239	0.3818	0.237	-0.0843	0.3192	-0.0065	0.1801	-0.1318	0.1509	-0.5488	0.491	0.2701	-0.7386	0.3453	-0.2799	0.5112	-0.1648	0.3932	0.1999	0.4908	0.3054	-0.0138	-0.2837	-0.3746	-0.8801	0.5659	0.2311	-0.2075	0.2654	0.4621	-0.8212	0.6175	-0.4434	-0.2034	0.3244	0.2036	-0.3257	0.4103
P05549	TFAP2A	Neurology_II	-0.6571	-0.5771	1.0558	-0.6741	-0.875	-0.7793	0.0795	-1.4848	0.2343	1.5823	-0.0983	0.3026	-0.0592	0.9905	0.9212	-0.8198	1.2142	0.1296	0.0083	1.063	0.5384	0.087	-0.3586	1.6585	0.5424	0.9076	1.5029	-1.0197	0.6652	0.0342	-0.7081	-0.7248	-0.245	-2.1495	-1.0468	0.3468	-0.5267	0.6028	-0.6296	-1.223	-2.3692	0.4063	-0.3326	0.9754	0.1432	-1.2752	0.3977
P05556	ITGB1	Cardiometabolic	-0.0307	0.7008	0.3733	0.0561	0.5431	-0.0024	0.0391	-0.2084	-0.2078	0.1306	0.0338	0.2852	-0.3265	0.0159	-0.3	-0.0934	-0.1197	-0.3083	-0.4324	0.0089	0.0685	-0.2536	-0.2932	-0.3279	0.3342	-0.3715	-0.0127	0.0053	0.9358	0.0741	0.1555	0.3055	0.0384	-0.1928	-0.1861	0.1894	0.0569	-0.1371	0.0436	-0.2594	-0.2363	-0.4362	0.1326	-0.2347	-0.1968	-0.0056	-0.3637
P05783	KRT18	Oncology	-0.3375	0.5748	0.1874	0.1092	-0.6408	0.1182	-0.4242	0.6385	-1.0249	0.4884	-0.2004	0.6594	0.5507	0.3123	0.058	-1.015	0.0193	-0.7073	2.2658	-0.9931	-0.9248	3.239	-0.2855	-0.128	1.3747	-0.1735	0.4611	0.7224	2.372	2.4027	0.4227	0.4265	0.1581	-0.2333	-0.1896	3.9208	1.1039	-0.0848	-0.2927	-0.1526	-0.2337	0.0643	0.5881	1.9429	2.5951	0.7695	1.2012
P05787	KRT8	Neurology_II	-0.3993	-0.1334	-0.1639	0.4424	-2.3966	-0.9078	-0.4619	-1.1328	0.0535	3.4396	0.5293	-0.4061	1.5497	0.4239	0.2529	-0.2631	1.4502	-1.2048	0.4794	-0.1681	0.4724	0.3187	-0.1225	-0.9554	-2.1362	-1.2516	-0.0744	-0.5593	0.7427	3.1264	-0.0882	0.1456	0.4701	0.0663	-0.6676	3.8399	2.2612	-1.4424	1.0582	-1.4117	-0.0923	-0.0755	-0.5705	1.3064	2.6682	0.8981	1.1956
P05937	CALB1	Oncology	0.1039	-0.4502	0.4054	-0.1288	0.534	0.5082	-0.0292	0.354	0.8112	-0.5788	-0.148	0.7645	0.0911	0.1667	-0.0164	0.3863	-0.2059	-0.9531	1.5932	-0.6994	-0.3495	0.6702	0.3066	-0.6187	0.2779	1.094	0.344	-0.1997	0.318	1.6081	1.3873	0.2846	-0.5413	0.0282	-0.7181	2.1777	-0.4053	-0.1553	-0.3067	-0.0896	-0.4939	-0.1594	-0.4305	2.1058	0.488	0.0972	0.3267
P05976	MYL1	Cardiometabolic_II	0.8791	-0.0062	0.0322	-0.3458	0.5845	0.2451	-0.569	-0.0222	-0.0249	0.1517	-0.2573	-0.5256	0.1474	-0.5506	0.2125	0.4646	0.3371	0.4003	0.4184	-0.0765	0.2361	-0.0971	0.3794	-0.4192	0.4238	0.4574	-0.132	0.1346	0.3265	1.0558	-0.1142	1.5337	0.0451	-0.3926	-0.5567	0.7168	0.545	-0.4901	0.0527	-0.2559	-0.7568	-0.2094	0.0062	-0.4868	0.2454	0.1188	-0.2978
P06127	CD5	Oncology	-0.2958	0.0848	-0.3298	0.2168	0.2933	0.4101	0.121	-0.0941	-0.7303	-0.223	-0.0344	0.0075	0.2173	0.5589	-0.253	0.0003	-0.3395	-0.9202	-0.5329	-0.5153	-0.15	0.4608	-0.2364	-0.947	0.136	0.9895	-0.5056	-0.0376	0.0984	1.4171	0.4647	0.5819	-0.2338	0.4336	-0.3613	1.8434	0.263	-0.4662	-0.3037	0.0146	-0.0804	-0.4067	0.0004	-0.0003	0.257	0.6209	-0.4865
P06132	UROD	Inflammation_II	0.8813	-0.0215	-0.1209	0.5313	0.3277	1.1064	-1.4295	0.1383	0.4069	-0.0334	-0.4056	-0.0405	-1.2709	-1.086	0.3529	0.6412	0.0364	-0.6657	2.1357	-0.0062	-0.6292	-0.868	0.654	-0.3437	-0.442	0.1233	-1.0437	-0.6206	0.5539	0.7989	0.6091	-0.3927	-0.5279	-1.0304	-0.3222	1.9135	1.5	1.1628	-0.919	-1.308	1.3237	-0.7637	0.6854	-0.5496	-0.5436	0.8681	-0.5829
P06213	INSR	Inflammation_II	0.1271	-0.2923	-0.1034	-0.0236	-0.0098	-0.0598	-0.0928	-0.1154	-0.1491	-0.0846	-0.0343	0.2064	0.1684	-0.0861	-0.1786	0.033	-0.277	-0.0418	0.2943	-0.1629	-0.0586	0.3385	0.0292	0.0383	0.1775	0.0218	0.1934	0.349	-0.0934	0.0352	0.0753	0.2361	-0.0404	0.127	0.1378	0.3624	-0.0502	0.1602	0.1725	-0.4043	-0.2149	0.0755	-0.146	-0.0081	0.4778	0.0019	-0.1882
P06276	BCHE	Inflammation_II	-0.2929	0.4428	0.0068	0.4792	0.0061	-0.2767	0.1902	-0.9	0.2838	0.1028	0.2753	-0.2499	-0.6384	-0.0774	0.0409	0.1799	0.2929	-0.0738	-1.2104	0.5423	-0.1929	-1.7939	-0.2663	-0.0497	0.3629	-0.4708	0.0922	0.1201	0.555	0.0138	0.3185	-0.405	-0.0298	-0.4711	-0.0061	-0.1069	0.5974	0.3867	0.1189	-0.0558	-0.0067	-0.232	0.3125	-0.1237	-1.1109	-0.4085	0.3782
P06280	GLA	Inflammation_II	-0.1059	0.5462	0.2956	0.4534	0.5007	-0.0075	-0.1054	0.4286	-0.0612	0.5846	-0.3108	0.3682	-0.2389	-0.0133	-0.0451	0.1201	-0.1479	-0.2647	-0.5512	-0.1843	0.15	-0.1197	0.4673	-0.2405	0.1057	-0.4182	-0.2995	0.0717	0.346	-0.2211	-0.4177	0.043	0.0031	-0.5224	0.965	1.1191	0.4998	0.3888	0.1853	-0.4142	0.1009	-0.3202	0.2467	-0.3737	0.597	-0.1272	0.2532
P06396	GSN	Inflammation_II	-0.0276	0.0998	0.2323	0.2231	0.1753	0.1392	0.2017	-0.398	-0.1553	-0.0824	0.1651	0.0732	-0.1887	0.3837	-0.0652	0.0945	-0.194	-0.0518	-0.3874	-0.1551	-0.0057	-0.7495	-0.2432	-0.3207	0.4075	-0.0367	-0.3387	-0.1092	0.3297	0.4742	0.0937	-0.3601	0.2114	-0.1454	-0.0371	-0.1714	0.0361	-0.0777	-0.1106	-0.1151	-0.0384	-0.1701	-0.1854	-0.0727	-0.2059	-0.4737	0.2016
P06401	PGR	Inflammation_II	0.422	-1.356	0.1961	-0.7922	-0.1639	-0.617	0.1454	-0.1547	0.0911	0.2492	1.1375	-0.3068	0.9859	0.1817	0.3655	-0.1193	-0.3752	0.1728	-0.4488	0.3681	-0.4662	-0.7341	0.9084	0.4035	3.6362	-0.0857	0.1828	0.313	0.4468	0.1526	1.6738	-0.615	-0.4915	0.072	0.538	0.1742	0.0015	-0.0528	-0.0058	-1.2981	0.2233	-0.1326	-0.4463	0.8856	0.1757	3.3906	0.5725
P06493	CDK1	Oncology_II	-0.21	0.0364	0.1163	-0.0914	-0.2313	0.6396	-0.7974	-0.3509	-0.0071	-0.0578	-0.0161	-0.744	0.1747	-0.5934	0.6219	-0.1518	-1.1326	-0.2241	1.6116	-0.1186	-0.1156	0.2617	-0.3293	-0.0039	0.0371	0.0012	1.0106	0.2626	0.0708	0.8673	0.6616	-0.3338	-0.4786	0.4199	-0.3872	4.0774	1.1495	0.2343	0.3063	0.0478	0.8264	-0.0854	0.6363	0.435	0.1929	0.2976	-0.6524
P06681	C2	Cardiometabolic	-0.3589	-0.2417	-0.0064	-0.032	0.2511	-0.162	0.1042	0.1419	0.3598	0.1058	0.1833	0.2338	0.1576	0.0896	-0.0648	-1.0261	-0.3099	-0.1264	0.1459	-0.4646	0.3008	-0.0106	-0.0557	-0.0786	0.1843	-0.0119	0.5261	0.3781	0.4777	0.1433	0.2069	-0.003	-0.4489	-0.3663	0.2236	0.626	0.0524	0.0602	0.3452	-0.5378	0.2462	0.0786	-0.4017	0.2278	0.6642	-0.5039	0.1447
P06727	APOA4	Inflammation_II	0.1248	0.3172	-0.0293	0.7266	1.0672	0.6809	0.6592	-0.1359	-0.5637	-0.004	-0.0276	1.238	-0.2725	-0.2397	0.1764	0.7382	-0.3428	-0.5745	-1.9908	-0.0738	-0.6428	-1.1643	-0.2194	-0.7178	0.713	0.328	-0.0393	-0.636	0.6671	1.4645	-0.2969	1.1702	0.1566	0.6505	0.4612	-1.2167	0.6131	-0.1709	0.4495	-0.4222	-0.224	-0.2324	0.0757	-0.9543	-0.0814	-0.4631	-0.0492
P06729	CD2	Cardiometabolic_II	0.0317	-0.893	-0.8335	-0.3907	0.4048	0.8631	-0.4823	1.6747	-0.6524	-0.8282	-1.0509	-0.5618	-0.6777	-0.3886	-0.6908	0.1146	-0.285	-0.714	-0.247	-0.6985	-0.1549	0.1675	-0.3432	-0.8759	-0.0459	1.0305	1.869	0.1631	2.492	0.5902	0.6411	0.9835	-0.3218	0.3298	0.2603	0.4631	1.0694	-0.7761	0.1505	-0.2678	-0.0008	-0.2446	-0.6954	-0.342	1.1991	0.067	0.3013
P06730	EIF4E	Inflammation_II	1.9158	-0.2601	-0.888	0.861	-0.6518	2.1353	-2.2994	0.6179	-0.021	0.4369	-0.8211	-0.7531	-0.5744	-0.2315	0.6159	0.3214	0.3403	-0.6749	4.5321	-0.2688	-0.6535	-0.393	-0.2843	-0.0846	-0.0222	-0.0057	-0.9063	-0.2394	1.5593	1.8029	0.9716	-0.5793	-1.5759	0.846	1.0332	-0.0323	1.6117	3.3529	-1.2725	-1.1378	1.703	-1.0233	1.3635	-0.7096	0.73	-0.3549	-0.0404
P06731	CEACAM5	Oncology	-1.1892	-0.2468	-1.6532	-0.6259	1.4783	0.2516	-2.2285	-1.8146	3.333	-0.603	-0.2473	1.0981	4.3373	0.4693	-2.7823	-0.0786	-0.5637	-1.2877	-1.3089	1.6923	1.0747	2.6748	-0.0083	3.0614	0.9841	1.032	3.8268	2.9209	0.9393	-1.0397	0.0554	1.5657	0.528	-1.4427	-0.2167	4.0089	-0.6028	-0.6867	0.8214	-2.5903	-0.1004	2.0465	-0.6443	0.0083	1.6187	4.1916	1.1992
P06733	ENO1	Neurology	1.0331	0.0238	-0.2762	-0.279	-0.0128	0.6767	-0.8038	0.1021	0.2425	-0.9486	-0.9897	-0.5062	0.0969	-0.6211	0.0128	-0.0971	-0.3972	-1.0085	1.8135	-0.472	-0.404	-0.3606	-1.1025	0.0181	0.0428	-0.0998	0.2467	0.6192	0.584	0.4451	0.6001	-0.656	0.4493	-1.3175	0.8253	4.3622	0.2613	2.1991	-0.6808	-0.7378	1.0077	-0.4829	0.2038	0.3613	1.5511	-0.6261	-0.271
P06734	FCER2	Neurology	0.2284	-0.7517	1.0948	0.183	0.8265	-0.7178	-0.593	0.3993	-0.5818	-1.3555	-0.1619	-0.4827	0.6782	0.3217	1.1309	-0.3678	-1.2284	-0.8084	0.1594	-0.3514	0.6726	-0.2347	-0.0533	-1.8276	-1.3479	1.9767	0.896	-0.2166	1.3422	2.0396	0.7495	-0.471	0.2432	0.2003	-0.5689	1.3053	0.457	0.0212	0.3375	-0.4271	-0.5964	-0.6735	1.7546	0.723	-0.5184	0.786	0.547
P06744	GPI	Inflammation_II	0.3719	0.2349	-0.4382	1.2754	-0.1939	0.0553	-0.6761	-0.22	0.4464	-0.2448	-0.247	-0.2069	-0.0361	-0.1148	0.1371	-0.9266	-0.4065	-0.0536	1.934	0.117	-0.3703	-0.5365	-0.24	-0.4071	-0.039	-0.3697	1.0457	0.1231	0.9882	0.3555	1.3284	-0.8844	-0.4515	-0.8121	0.408	5.1137	0.5872	1.1815	-0.6068	-0.1123	0.329	-0.1865	0.0361	0.6267	0.7131	-0.7987	0.3682
P06748	NPM1	Neurology	0.3749	0.5493	-0.0994	0.4103	0.012	-0.2647	-0.5977	-0.2935	0.4434	-0.3645	-0.5155	-0.2687	-0.4275	0.3508	1.1635	0.6492	-0.1255	-0.7714	0.3628	-0.3018	-0.6593	0.2963	0.1331	-0.0146	-0.6017	-0.7197	-0.3878	-0.4883	0.3359	1.2064	2.0762	-0.2437	-0.7724	2.1969	-0.7871	4.6312	0.9952	-0.2581	-0.6032	-1.2254	1.3779	0.1964	1.0584	-0.012	0.1526	0.0188	0.65
P06753	TPM3	Cardiometabolic_II	0.2036	1.5744	0.5161	1.17	1.064	0.1267	0.45	-0.2893	-0.7979	-0.3034	-0.2745	-0.7777	-0.9154	-0.6264	-0.6904	0.3719	-0.6646	1.4886	0.4102	-0.5649	-0.5822	-0.2596	-0.0923	-1.2298	2.3219	0.8437	-0.1326	-0.2689	0.5375	1.9442	4.7732	-1.322	-0.3753	0.8545	-0.6578	1.3207	-0.1232	-0.0975	0.3557	-0.5648	0.1079	-0.6097	0.034	0.2714	-0.6434	-0.5965	-1.5243
P06756	ITGAV	Oncology	0.1706	0.6171	0.4084	0.2975	0.5799	0.1231	0.6062	-0.6518	-0.2279	0.0568	0.0226	0.1947	-0.5494	-0.1591	-0.1239	0.0118	-0.0334	-0.3051	-1.0247	0.3819	0.0726	-0.335	-0.6584	-0.3111	0.0499	-0.6101	-0.3392	0.2169	0.2774	-0.0118	-0.2	0.1105	0.1425	-0.1572	-0.5642	-0.371	0.0161	-0.0933	-0.119	0.0227	-0.4437	-0.3012	0.0259	-0.4059	-0.5805	-0.1082	-0.0753
P06850	CRH	Oncology	-0.3882	-1.0404	-0.4654	0.0672	-1.2674	-1.5487	1.7952	0.0287	-0.2619	1.4335	-0.1832	1.5091	0.0851	0.2937	-0.7922	-0.1621	-1.7133	-0.9818	-0.2426	-1.5104	0.1982	0.7213	-0.0043	-1.5275	-1.3711	0.0163	0.0043	-0.1012	1.4923	-0.7789	0.0618	-0.6663	0.3401	0.1607	0.5212	-2.6632	-0.2779	2.1915	-0.3	0.613	1.2549	-0.9776	-0.4428	0.8671	-0.9235	0.378	-0.1819
P06858	LPL	Cardiometabolic	-0.0212	0.6288	0.6672	-1.2655	1.3546	0.6156	0.001	0.7979	-1.1726	0.4013	0.7592	-0.0807	0.3353	0.162	-0.2933	-0.4953	-0.095	-0.8544	-0.2016	-0.6181	-0.978	-0.1259	-0.7488	-0.4896	-0.3337	0.791	-0.2083	0.1841	1.2255	2.3317	0.8549	1.4255	-0.3922	0.6154	-0.8941	-1.367	-0.2936	-0.2737	0.3031	0.1521	0.3304	-0.1536	-0.5287	-1.5799	-1.6464	-0.1708	-0.0922
P06870	KLK1	Oncology	1.5152	1.0074	-0.5644	-0.9584	0.7565	0.69	-0.3602	-0.0169	-1.0764	-0.4299	-0.7016	0.415	0.0169	3.4291	-1.2612	-1.1194	-0.5743	0.9012	-1.2372	2.5933	3.184	1.3024	1.1811	0.8698	-0.1575	0.9599	3.0769	2.3218	2.7269	-0.1333	2.9484	3.5879	0.6574	-0.6005	3.0251	-0.5552	-0.2805	3.0408	1.4041	-1.0349	-1.4076	-1.1109	1.5947	-1.3933	-0.8938	-0.4062	-0.2476
P07093	SERPINE2	Cardiometabolic_II	1.2492	0.1117	-0.468	-0.1033	0.2647	-0.0551	-0.9306	0.1535	0.3053	-0.3765	-0.2934	2.6514	-0.8348	-0.7936	0.0037	-0.4825	-0.5223	-0.6657	1.0791	-1.0366	0.1036	-0.3355	-0.5494	0.6892	-0.7384	-0.9476	-0.2428	0.0545	0.073	-0.2584	-0.168	-0.9705	-0.0888	-0.0431	2.2355	0.0797	0.3577	2.0437	-0.337	0.7412	0.9209	-0.9238	0.1694	-0.6262	1.0642	-0.4695	0.1152
P07098	LIPF	Cardiometabolic_II	0.599	0.3309	0.2713	-0.2762	0.6328	1.6472	-0.0104	-0.7805	0.14	-0.1286	-0.4819	1.2724	-0.9956	-0.78	-0.5625	0.1424	0.3121	-0.9086	-0.2034	-0.6967	-0.5783	-1.583	0.3286	0.9661	0.8029	-1.0727	-0.9871	-0.4768	0.0325	1.4249	-0.0046	-0.0026	0.1506	-0.5681	0.2868	-1.399	0.8211	0.32	0.5704	0.2885	0.8076	0.5939	-0.1937	-0.1645	-0.2924	-0.2236	0.1691
P07108	DBI	Neurology	0.2828	-0.0832	-0.0699	-0.0356	-0.3074	0.1324	-0.3295	-0.1734	-0.5688	-0.2446	-0.3372	0.0558	-0.0919	0.0074	-0.0898	-0.3243	-0.2343	-0.8566	1.5655	-0.4123	-0.4579	0.9099	-0.4192	-0.7481	0.362	1.661	0.8307	0.075	1.2384	3.2272	0.4547	-0.2007	-0.391	-0.3463	0.26	1.5353	0.6911	0.9875	-0.7608	-0.387	-0.0973	-0.6136	0.052	-0.0031	1.215	-0.2731	-0.42
P07148	FABP1	Inflammation	-1.2924	1.2364	0.0161	0.4073	-0.8187	1.8412	-0.6325	-0.4232	-0.2791	-0.9163	1.055	2.1947	-0.4663	-0.3391	0.2339	1.8224	-1.0554	-0.8381	-1.4046	0.3682	-0.2447	1.3768	-1.2123	-2.5512	1.641	1.0607	2.0376	-1.2225	0.8425	4.5082	-0.0161	2.1668	-0.3255	-0.8892	1.2413	0.9614	1.8089	-1.8793	-0.6288	-0.8126	0.8551	-1.8192	0.5629	-0.7504	2.178	-0.4952	-1.5148
P07196	NEFL	Neurology	-1.2379	0.0298	-0.0298	1.1683	-0.4938	0.318	-0.5146	0.3931	0.4547	0.6728	-0.7397	0.3988	-0.0911	0.0681	-1.6596	-0.3853	-0.8371	-2.5153	2.3695	-0.5952	-0.3558	1.886	1.2988	0.0384	0.4751	2.1447	0.8208	0.5371	0.1334	2.2918	0.1012	0.9642	-0.6807	-0.2022	-0.6064	-0.8178	0.8111	2.6614	0.4517	-0.8096	0.2912	0.0828	-0.5225	0.1853	1.2235	0.0859	-1.8209
P07204	THBD	Cardiometabolic	-0.3089	-0.0975	0.4052	0.0443	0.806	0.3174	-0.1381	0.223	-0.5861	-0.1676	0.0566	0.1417	0.6075	0.0945	-0.1305	-0.0126	-0.1327	-0.584	1.4007	-0.5838	-0.6597	0.3432	0.1779	-0.5146	0.4854	0.8585	0.349	0.2788	0.6805	1.7299	-0.2637	0.2147	-0.264	0.4245	-0.3017	1.153	0.2954	-0.1686	-0.4421	-0.5147	-0.4152	-0.3127	-0.1705	0.241	1.0656	0.1733	-0.3669
P07225	PROS1	Inflammation_II	-0.5908	0.1452	-0.0135	0.0135	0.264	-0.3314	-0.232	0.9774	0.6101	-0.0829	0.2591	-0.1801	0.0673	-0.172	0.2246	-0.3342	-0.2427	0.0059	0.1788	0.653	-0.4455	-0.2793	0.2876	0.0572	0.6564	-1.2898	0.2048	0.5043	0.4306	0.1551	0.0906	-0.2741	-0.2714	-0.5948	0.4045	-0.033	0.3932	0.0825	-0.0464	-0.5286	0.255	0.0307	-0.2721	0.3991	0.7018	0.0763	0.1135
P07237	P4HB	Oncology	-0.1865	0.6796	-0.0444	-0.0349	0.3779	0.2401	-0.2432	0.4097	-0.2094	-0.7246	-0.0657	0.6442	-0.0802	-0.0521	0.4799	0.1937	-0.1431	-0.969	-0.1598	-0.089	-0.3461	0.4547	-0.1763	-0.6057	0.1422	-0.0423	0.4938	0.2414	0.4744	1.3383	-0.3432	-0.3543	-0.511	0.1109	0.9163	1.6943	-0.1005	0.5962	0.2183	-0.5369	-0.1621	-0.4215	-0.0955	-0.3469	0.8354	-0.2596	-0.2376
P07288	KLK3	Cardiometabolic_II	0.4098	0.6041	-0.9292	0.549	-0.1315	0.8104	-3.587	0.3271	2.8017	-3.9592	0.2295	-0.3191	-0.106	-2.8904	-0.1568	1.7888	1.5494	0.6443	-3.6758	-3.338	-3.6326	-2.102	1.4436	1.6688	4.0112	2.1764	2.0317	-3.0641	2.7613	-0.8447	-3.3304	-0.7574	1.334	1.3294	-1.0594	-0.4814	0.6555	0.0299	-3.959	2.6382	0.9147	1.5957	0.5709	-1.0555	-0.0299	1.1042	-0.8238
P07306	ASGR1	Neurology	-0.5873	-0.1158	-0.3725	-0.1444	0.1437	0.1499	-0.2203	0.5943	-0.6421	-0.0709	-0.1901	0.2834	0.1678	0.1976	0.107	0.0523	-0.1888	-0.7073	0.0909	0.4616	-0.2476	0.5372	0.2601	-0.417	0.331	0.9354	0.5846	0.4408	0.3119	1.27	0.062	0.2362	-0.8102	0.0594	-0.0034	0.6185	-0.0474	0.4079	-0.285	-0.5803	-0.3737	0.3524	-0.2794	0.1908	0.6206	0.0848	0.3188
P07307	ASGR2	Inflammation_II	-1.0188	-0.5023	-0.3976	0.1371	0.0123	-0.0021	-0.8765	1.406	-0.89	-0.4004	-0.0749	0.8958	0.7729	0.8021	-0.0538	-0.0333	-0.7327	-0.1191	0.9682	0.0578	-0.5496	1.1487	0.2452	-0.4738	-0.2593	1.5346	0.4087	1.2528	0.3191	1.7542	0.2769	-0.5942	-0.2872	0.208	-0.0253	1.4685	-0.1085	-0.4932	-0.3027	-0.7306	-0.3042	0.1689	0.1879	0.141	1.5164	0.3333	0.1421
P07311	ACYP1	Inflammation_II	0.5375	-0.3141	-0.0428	0.3044	-0.0784	0.8452	-1.1529	0.8303	0.5285	0.3609	-0.4097	-0.1226	-0.6529	-0.5394	0.7301	0.3274	0.1285	-0.2496	2.6132	0.6303	-0.5675	-0.5572	0.7128	-0.4087	-0.2372	0.8122	-0.4917	-0.3847	0.7996	1.5158	0.8887	-0.2151	-0.6855	-0.3843	-0.1226	2.6164	1.1455	0.8578	-0.4573	-1.5779	1.3156	-0.7771	0.8406	-0.4459	-0.1387	0.6538	-0.5092
P07320	CRYGD	Neurology_II	1.8809	0.8367	-1.3757	0.4983	-1.6682	0.2227	-1.8869	-1.8125	1.0584	-0.0717	-0.4377	0.1084	-0.6674	-0.9461	0.0046	-0.8626	-0.8821	0.5758	2.7086	0.93	-0.8991	-1.0799	-0.9926	-1.0179	-0.2806	-0.1405	-0.9317	-0.365	1.2585	1.8625	2.3322	-1.1758	-0.2485	0.4898	0.2634	0.6544	1.4058	1.4007	-1.147	-1.0158	0.6529	0.7756	2.9737	0.6043	0.3275	-0.6749	-0.4893
P07332	FES	Oncology	0.1659	-0.8911	-0.1724	0.1919	-1.736	0.6492	0.445	0.0355	-0.2688	0.4406	-0.3225	0.7192	-0.835	0.3414	-1.9221	0.6905	-0.3341	-0.5031	0.2599	0.0017	-0.366	-1.0216	-0.1459	-0.6881	0.2954	-0.0904	0.957	-0.1623	-0.8489	0.8905	0.7056	0.1632	-0.1622	0.6659	0.2633	0.0199	0.2307	0.0569	0.6913	0.0991	0.6239	-0.4427	-0.2392	0.3803	0.005	-3.0164	-0.6794
P07333	CSF1R	Inflammation_II	-0.1055	0.2894	-0.2249	0.8547	0.0944	0.214	-0.3229	-0.1375	0.1332	0.634	0.2419	-0.082	-0.2591	0.1371	-0.4712	-0.2754	0.0558	-0.5468	0.1297	-0.1988	-0.1264	0.6577	-0.2941	-1.6984	0.313	-0.3845	-0.2424	-0.7726	0.4162	0.653	0.6366	0.8535	-0.0936	0.2601	-0.209	0.6697	0.3024	-1.226	0.1258	-0.4964	-1.235	-0.9187	-0.0892	-0.2281	0.4645	-0.7043	-0.4138
P07339	CTSD	Cardiometabolic	-0.7827	0.4437	2.0331	0.3475	-0.2315	-0.4057	-0.5027	1.1345	0.9984	0.8396	-0.3423	0.4703	0.2222	0.5646	-0.1386	-0.299	-0.6976	-0.1491	0.5394	0.838	-0.4091	0.0027	-0.0027	-0.6401	-0.2283	-0.0169	0.2578	0.039	0.6277	-0.4269	0.2188	0.2409	0.4629	-0.4001	1.4313	0.7957	0.9122	-0.6752	0.1735	-0.9394	0.3074	-0.1495	1.4713	-0.4464	0.503	-0.3619	-0.6046
P07355	ANXA2	Cardiometabolic_II	0.3377	0.2619	0.1667	-0.0037	-0.1923	-0.492	-0.739	-0.2908	-0.042	-0.1351	-0.8109	-0.2443	-0.4596	-0.2154	-0.0215	-0.4098	-1.0355	-0.38	1.1889	-0.7335	0.1436	-0.7389	-0.5254	-0.3616	-0.0263	-0.2845	0.6651	0.0877	1.0125	0.6327	1.7233	-0.6548	-0.4331	0.243	0.5165	1.0242	1.2223	1.0829	0.0824	-0.4377	0.7819	-0.9352	-0.4683	0.2331	0.2808	-0.407	0.0341
P07358	C8B	Inflammation_II	-0.1846	-0.0029	-0.5841	-0.2849	0.3508	-0.3003	-0.2321	-0.2103	0.3623	0.0029	0.1228	0.2755	0.0257	0.3247	0.0543	0.0404	-0.8261	0.1665	0.3414	0.365	-0.2439	-0.3244	-0.7395	0.237	0.4209	0.1915	0.7329	0.5395	0.3808	-0.0221	-0.0395	-0.828	-0.067	-0.0879	0.2193	0.4432	0.2483	0.2126	0.3187	-0.404	0.3809	-0.0424	0.112	0.3737	0.4761	-0.1577	0.0606
P07359	GP1BA	Cardiometabolic	-0.396	0.5651	-0.3741	0.1941	0.4539	0.5194	-0.1004	0.0588	-0.2127	0.0311	0.0561	0.5712	0.1302	0.1082	-0.2708	-0.3734	-0.4823	-0.0881	0.2102	-0.0042	-0.7815	0.5172	-0.1507	-0.8495	-0.3025	-0.1077	0.1941	0.2386	0.3983	0.6075	-0.1298	0.4455	-0.178	-0.2532	-0.0001	0.7624	0.3009	-0.0331	-0.393	-0.4426	0.0072	-0.4602	-0.0541	0.42	0.6949	-0.0973	-0.6051
P07451	CA3	Cardiometabolic	-0.7977	1.544	0.8206	0.0168	-0.1701	1.6394	-0.6732	-0.2514	0.1226	-0.5983	-0.1866	-0.58	-1.3654	-0.8972	0.5106	0.4497	-0.1547	0.3863	2.0388	-0.1492	-1.1781	0.2173	-0.3123	-0.2215	0.5259	0.4647	-0.4313	0.4187	0.9612	2.1523	1.3439	0.0258	-0.9302	0.2201	-0.6688	0.7018	0.8855	-0.2653	-0.8349	-0.8124	0.6029	-1.5933	0.6395	-0.4597	-0.8581	0.5738	-0.8064
P07478	PRSS2	Cardiometabolic	-1.2607	-0.0714	-0.171	-1.3395	-0.0258	-0.0378	0.247	-0.5328	-1.2229	-0.0565	-0.4149	-0.3298	0.2014	0.6435	0.0631	0.6387	-1.8134	-0.8972	-0.0622	0.5515	-0.3291	-0.8925	1.1342	1.2165	0.3221	1.0725	0.9728	-0.2271	0.1452	1.4856	-2.5185	-0.0295	-0.5342	-0.2869	0.4783	2.0259	1.0075	0.0258	0.1081	-0.9728	-0.7231	-0.0947	0.2935	0.683	1.5987	0.2574	-0.5916
P07492	GRP	Cardiometabolic_II	0.7032	0.543	0.4588	-0.9489	0.9581	0.4075	0.396	-1.1017	4.9078	-1.6641	-0.33	0.3236	-0.2908	0.2157	-1.1342	0.1096	0.38	-0.8015	-0.7899	-1.1019	-0.1235	1.9828	-0.4637	-1.0805	1.7626	0.6868	0.9146	-0.1282	0.4686	2.4389	-1.0024	0.2332	0.4464	-0.1642	0.2463	7.646	0.3961	-0.3536	0.0897	-0.9503	0.0635	-0.1211	0.0158	-0.3497	0.5042	-0.4786	-0.4919
P07585	DCN	Cardiometabolic	-0.1933	-0.0359	0.1273	0.0563	0.2146	0.1776	0.1579	-0.3328	0.4599	0.0108	-0.4254	0.5854	-0.2024	-0.0426	-0.5051	-0.2242	-0.3289	-0.6837	0.6759	-0.3287	-0.3058	0.4759	-0.1368	-0.3932	0.175	0.5992	0.2701	0.5898	1.329	1.1042	-0.2296	-0.127	-0.0493	0.0767	-0.2253	-0.3991	0.4728	-0.3348	0.1322	-0.1602	-0.2702	-0.2866	0.1255	-0.2914	0.5165	-0.6533	-0.426
P07602	PSAP	Cardiometabolic_II	0.4214	0.2538	0.2419	-0.1768	0.0448	0.1373	-0.209	-0.1405	-0.4585	-0.0739	-0.1229	0.3278	-0.0478	-0.0284	-0.3368	0.3725	-0.3678	-0.9241	0.3173	-0.027	-0.2328	0.2771	-0.3127	0.0171	0.0291	0.8118	0.2363	-0.1618	0.7728	1.9298	0.1196	0.4097	-0.3331	-0.1179	0.3952	1.0282	0.7227	-0.0798	0.1115	-0.2926	-0.2515	-0.4145	-0.4642	-0.3654	1.1152	-0.1151	-0.5224
P07711	CTSL	Cardiometabolic	-0.3935	0.1275	0.3915	0.0009	0.1501	0.1207	-0.7563	0.4215	0.1961	-0.3297	0.1861	-0.2175	0.5984	-0.0009	-0.5214	0.8313	-0.5121	-0.5763	0.9551	0.1138	-0.3438	0.4342	0.093	-0.4214	0.2664	0.3135	0.5436	0.2515	0.5957	0.6179	-0.4416	1.2415	-0.7791	-0.3388	0.3767	1.46	0.5664	-0.3202	-0.0276	-0.6554	0.1729	-0.0295	-0.1995	-0.3069	1.2528	0.0049	-0.4074
P07741	APRT	Neurology	1.4641	-0.0236	-0.1288	0.6137	-0.1495	1.7061	-1.6552	0.0333	0.4444	-0.7262	-0.6715	-0.2362	-0.462	-0.2655	0.6178	-0.175	0.1376	-0.7487	2.4122	-0.2384	-0.8477	0.3217	-0.3352	-4.2942	-0.3742	0.7733	-0.4811	0.0236	1.0039	1.6471	0.8547	-0.1929	-0.601	0.2929	-0.1069	0.5977	1.1795	2.07	-0.6469	-0.7142	1.055	-0.3513	0.5604	-0.4886	-0.7778	0.2375	-0.1489
P07766	CD3E	Oncology_II	-0.0074	0.5486	0.2545	0.0496	0.1121	-0.3249	0.1383	0.4218	-0.0211	1.0414	0.3669	-0.07	-0.2607	0.4288	0.8053	-0.1013	-0.2488	-0.3126	1.0634	-0.1467	-0.1425	0.1231	1.3358	-0.0368	-0.2732	-0.1058	-0.1572	0.7242	0.4348	0.3426	0.7463	1.5256	-0.2489	-0.3329	-0.2362	0.079	-0.146	-0.0686	-0.0906	-0.0838	-0.136	-0.0625	0.2036	0.8153	0.19	-0.1253	0.3377
P07858	CTSB	Cardiometabolic	-0.2333	0.8953	0.313	-0.8508	1.7969	-0.435	-0.7709	0.3894	-0.2358	0.4483	0.1564	0.6805	0.8402	0.4542	-0.0142	-0.4908	-0.8365	-1.1245	1.2573	0.2884	-0.8807	1.5574	-0.5286	-0.6526	-0.3853	1.2032	-0.1348	0.2851	1.4194	0.354	0.1257	-0.082	-0.7266	0.3785	-0.8215	0.4994	0.1539	-0.9523	-0.409	-0.6636	-0.4677	-0.1628	0.3904	0.8739	0.6914	1.5178	-0.7669
P07911	UMOD	Cardiometabolic	-0.0488	-0.3815	-0.0441	0.2843	0.5787	-0.144	-0.0841	-0.1617	0.514	-0.0184	-0.3168	-0.7059	-0.0821	-0.1705	0.0313	0.7665	0.5505	0.7104	1.358	-0.0041	0.4081	-0.343	0.1089	0.4459	-0.3072	-2.3434	-0.2387	0.4295	-0.4745	-2.7276	0.6183	1.0745	0.8834	-0.48	-0.9799	0.9206	-1.0386	0.1972	0.0184	-0.2542	0.6443	-0.0283	0.0041	0.5238	-0.4591	-0.1472	-1.0492
P07942	LAMB1	Cardiometabolic_II	-0.4482	0.1235	0.1736	0.2826	0.2169	-0.0277	-0.2037	-0.3354	-0.0588	0.011	-0.0745	-0.0472	-0.3582	-0.2416	-0.1018	-0.1074	-0.0295	-0.4047	0.3171	-0.1807	-0.0835	0.0001	0.4105	-0.158	0.0487	0.1538	0.4995	0.3455	0.5372	0.5267	-0.0264	-0.0212	-0.4023	0.2727	0.2874	0.8935	0.1077	-0.5568	0.3577	0.0997	-0.1642	-0.1161	-0.1572	0.0777	0.2529	-0.0266	-0.5653
P07947	YES1	Oncology	0.8522	0.2314	-0.3504	0.4089	-0.0304	0.724	-0.5006	0.0306	-0.212	-0.1253	-0.3469	0.1594	0.1334	-0.728	-0.4493	-0.8365	-0.7692	-0.9948	0.5841	-0.342	-0.795	0.3395	-0.6649	-0.2333	-0.0866	0.8163	0.0256	-0.1296	1.1228	1.0479	-0.5928	0.013	0.406	-0.0032	1.4387	1.5081	0.4282	2.8104	-0.4523	-0.3626	0.2184	-0.6368	-0.4139	-0.4158	1.2178	-0.4266	-0.0465
P07948	LYN	Oncology	1.9102	0.3199	-0.7168	0.6881	0.4737	1.3474	-0.2272	-0.0062	-0.3961	-0.0016	-0.0931	0.1597	-0.0857	-0.546	0.0016	-0.9825	-0.1899	-0.4879	0.5306	-0.5202	-0.5654	-0.4554	-0.7337	-0.0027	0.3564	-0.4248	0.4941	-0.0734	0.6386	0.2233	-0.1607	-0.1683	-0.4257	0.1192	0.6791	1.3701	0.641	2.664	-0.1634	0.5302	0.2484	-0.2173	-0.3362	-0.1521	0.4335	-0.1464	0.0035
P07949	RET	Oncology	-0.1245	0.1503	-0.2065	-0.0109	-0.3047	-0.297	0.162	0.076	1.2524	0.2274	-0.27	-0.1013	0.0092	-0.6925	-0.1306	-0.0056	-0.0346	-0.4304	0.2331	0.7288	1.0124	0.0552	-0.2851	-0.5344	0.5002	-0.7339	0.6004	0.2741	0.4027	0.0905	-0.0025	-0.6425	0.4706	-0.3794	0.1189	1.3305	0.1829	-0.3386	0.2477	-0.3053	-0.4626	-0.3975	-0.3028	-0.6231	1.0748	-0.347	0.867
P07954	FH	Neurology_II	-2.1333	1.5746	0.0426	-0.7955	0.8651	-0.261	-1.2795	-0.9505	-0.543	-0.4958	-0.2595	1.7008	-0.2195	-1.4125	1.0757	-0.7964	-0.2621	-4.5195	3.7478	0.8838	-0.8121	-0.5623	-2.3094	1.5157	0.6183	0.9256	-1.082	0.56	-0.6998	-1.6129	-1.9854	0.4985	5.5569	-4.2778	1.5554	1.0954	-0.5555	0.6829	2.2373	-1.6348	1.0971	-0.3187	0.4229	1.3811	-0.2742	0.2595	3.2445
P07992	ERCC1	Oncology_II	-0.1125	0.3117	-0.0752	0.3721	0.6012	-1.6034	0.5011	-0.958	0.1354	0.0547	-0.3889	-0.9045	0.0892	-0.4425	0.1789	0.1731	-0.8426	-0.2414	0.5791	-0.2101	-0.0832	0.1826	0.0375	-1.5789	0.0197	0.1153	-0.4355	-0.5363	0.5353	-0.3587	-0.2947	-0.6691	0.2306	-0.2365	-0.3404	0.5467	-0.372	0.0055	-0.2009	-0.9472	0.7184	0.0163	0.114	0.386	0.4016	-0.9121	-0.3326
P07998	RNASE1	Inflammation_II	-0.7469	0.0384	0.4303	0.2084	-0.0076	-0.038	0.0076	-0.2213	-0.887	0.2186	-0.0317	0.4049	1.124	0.5645	0.1899	-0.4383	-0.2637	-0.8314	0.3069	-0.2236	-0.4598	1.1816	-0.5091	-0.9016	0.7467	2.1701	0.308	0.1634	1.3707	3.109	0.7481	-0.1238	-0.586	0.0834	0.1805	0.1249	0.4876	-0.5957	-0.5164	-0.4087	-0.2083	0.1177	-0.0767	-0.2933	0.8316	-0.197	-0.4162
P08069	IGF1R	Oncology	-0.1808	-0.0711	-0.0136	-0.1565	0.6358	-0.0841	-0.2504	-0.0083	0.0418	-0.4482	0.0151	0.1831	-0.2611	0.2247	-0.0954	0.0351	-0.1312	-0.7621	0.8646	-0.3324	-0.3779	0.8595	-0.0101	-0.2187	0.1216	0.6524	0.1762	0.052	0.8323	1.3407	0.4375	0.4668	0.0555	0.1448	0.0083	0.2141	0.0493	-0.2401	-0.1644	-0.4714	-0.0169	-0.6708	-0.0949	0.0736	0.7641	-0.0433	-0.1736
P08118	MSMB	Cardiometabolic	0.3535	0.3128	0.053	-0.7418	-0.5898	0.5225	-1.7227	-1.5954	-0.0766	-1.6042	-0.5325	1.2278	0.5984	-0.1889	-0.4445	-0.0061	-0.4947	-1.9124	-0.8927	-1.1862	-0.0647	-0.4235	0.24	-2.9731	0.8163	4.7418	0.053	-1.6701	1.196	1.5643	0.311	0.5407	0.0944	0.1885	-1.6386	-0.6773	-0.2467	-0.7132	0.0578	1.295	0.6828	-0.6334	-0.5249	-0.9068	0.066	0.7812	-0.5589
P08134	RHOC	Neurology	2.3659	0.7063	-0.7018	2.0173	1.1899	1.8659	-0.7893	0.5061	-0.3033	-0.6819	-0.3198	0.5907	0.7166	-0.532	-0.4019	-0.8561	-1.1336	-1.0608	0.2896	-0.6375	-1.5912	1.0512	-0.9913	-0.5268	0.4755	0.4599	0.3475	0.3151	1.4832	1.0642	0.1705	-0.3738	0.4214	-0.6614	2.2028	1.0036	0.0895	4.6431	-0.7397	0.8909	0.1554	-1.0794	0.3333	-0.9354	1.6965	-0.7154	-0.7423
P08138	NGFR	Cardiometabolic_II	-1.167	-0.1593	-0.3992	-0.4421	-0.2373	-0.7994	-0.1279	0.0511	0.0662	0.5874	0.3619	-0.9478	0.1182	-0.395	0.4649	0.6387	-0.696	0.123	-0.234	0.112	0.2479	-0.2571	0.0164	-1.5238	0.4696	0.8218	0.0297	0.4399	0.7159	1.1047	0.1804	0.8402	-0.1829	-0.6727	-0.4344	0.4064	0.5395	-0.65	0.2173	-1.4958	0.3372	0.4207	-0.2693	0.4288	0.7492	0.0281	-0.0788
P08174	CD55	Cardiometabolic	-0.1993	0.5379	0.2188	0.0402	0.5802	0.2673	0.0164	-0.1188	-0.7816	-0.0752	0.0075	0.3427	-0.0234	0.1123	-0.1844	0.1886	-0.0381	-0.6518	0.3382	-0.0819	-0.5671	0.5658	-0.0571	-0.6223	0.29	0.8644	0.1057	-0.0651	0.7475	2.0036	0.1357	0.3404	0.2149	0.0165	-0.3975	-0.0138	-0.0366	-0.3851	-0.0243	-0.0816	-0.2774	-0.2466	0.3344	-0.2548	0.4485	-0.0966	-0.4002
P08185	SERPINA6	Inflammation_II	-0.0982	0.3601	-0.0332	-0.5987	0.4402	-0.341	0.088	0.4131	-0.4021	-0.0321	0.4137	0.2803	-0.1483	0.1209	-0.039	0.4429	-0.3502	0.2291	-0.1552	0.4243	0.471	-0.4959	0.7328	-0.0819	0.1681	-0.2835	0.1227	0.047	0.3882	0.0047	0.0899	-0.3606	-0.0588	-0.2985	0.3031	0.365	-0.3716	0.1641	0.1885	-0.5219	-0.1218	-0.451	-0.1024	0.3086	0.1598	0.079	-0.0912
P08217	CELA2A	Cardiometabolic_II	-1.4657	-0.4446	-0.4479	-1.839	0.4753	0.0884	0.4836	-0.9993	0.4645	-0.0963	0.7946	0.0032	0.9296	0.3571	0.468	0.5571	-1.7214	-0.031	-1.9918	0.5153	0.0241	-0.9088	1.7775	1.6059	-0.082	-2.196	0.9323	-0.4504	-0.4191	-0.5881	-2.8705	-1.2306	0.4788	-0.2344	1.2622	3.2687	0.407	0.2866	0.5808	-1.2189	-0.0104	0.3681	0.0047	0.8983	1.5379	0.979	-1.1913
P08236	GUSB	Cardiometabolic	0.2596	0.9796	-0.1944	1.3633	0.3475	-0.4101	-0.7553	1.5082	0.4106	0.1396	-0.6996	0.4015	-0.1264	-0.2714	-0.2877	-0.1917	-1.4168	-0.3514	-0.4573	0.7459	-0.5371	-0.3951	1.0642	0.5856	-1.0483	-0.2476	-0.0853	0.7812	1.5481	-0.9616	-0.2778	2.081	0.4892	0.267	0.3601	2.4907	1.8361	-0.0749	0.9435	0.2504	-0.5289	-0.829	0.7245	-1.1969	-0.0517	0.0059	0.3899
P08254	MMP3	Neurology	-0.5618	0.2955	0.4152	-0.0924	0.301	0.9098	-0.2682	0.0914	0.3959	-1.208	-0.1796	0.6954	-0.6707	0.0036	-0.6027	-0.4443	-0.4179	-0.4412	0.2689	-0.2801	-1.4859	0.8722	1.3233	-0.0295	0.7906	0.8735	0.9016	0.0323	0.9276	1.0391	-0.5811	0.0284	-0.5581	-0.9235	-1.0186	-1.4345	0.5047	0.4817	-1.729	-0.4342	0.0031	-0.1927	-0.6368	0.5165	0.6341	-0.3036	-1.1735
P08263	GSTA1	Cardiometabolic	-0.052	1.1254	1.4077	0.8502	-0.6693	-0.1517	-0.2444	-0.7297	-0.3896	0.4252	-1.032	-1.1429	-1.9673	-1.034	0.7871	0.7116	0.3586	-0.2131	-3.3535	0.4539	0.3	-2.4433	-0.8108	-1.2371	1.8427	-1.3644	-0.2798	-1.9096	1.0802	0.8801	-0.4139	-0.536	0.3221	-0.7061	0.3378	2.8321	1.6033	0.0223	1.1073	-0.7173	-0.2627	-0.6396	0.8114	0.5735	-1.7361	-1.974	0.9299
P08294	SOD3	Inflammation_II	-0.4508	0.3318	0.6247	0.2649	3.8801	-0.1685	0.1758	-0.6265	-0.3987	0.3926	-0.2514	0.139	0.0273	0	-0.398	-0.1457	-0.1143	-0.8048	0.1	0.0453	-0.1569	-0.0148	-0.3174	-0.0908	-0.0177	0.0263	-0.1014	-0.0197	1.2653	0.8324	0	0.3027	-0.0169	-0.1194	-0.253	0.6553	0.0218	-0.3027	0.1242	-0.2474	-0.2147	-0.4301	-0.3167	-0.1675	0.6918	0.2456	-0.2763
P08319	ADH4	Cardiometabolic	-0.2856	0.8019	0.2361	0.0124	-0.9255	0.3512	-0.0871	-0.3155	-0.553	0.1623	-0.4034	-1.3708	-0.8758	-0.5171	0.6382	0.3289	-0.0036	-0.3035	-2.6421	0.2997	0.1386	-1.9663	-1.2035	-1.2203	1.5119	-0.5505	0.0638	-1.6495	0.3379	0.2991	-1.2504	-0.037	0.4532	0.1149	-0.0736	1.4693	0.4	0.0436	0.0634	-1.1425	-0.7024	-0.6534	0.3742	0.8142	-0.939	-1.7571	0.7752
P08397	HMBS	Oncology	0.121	0.0762	0.2977	0.0451	-0.5946	0.5321	-1.0223	-0.1812	0.4295	-0.4309	-0.2466	-0.3823	-1.1777	-0.5085	0.4287	0.5774	0.3876	-0.0863	1.1259	0.3294	0.0704	-0.5128	0.1804	0.2732	-0.0513	0.0675	-0.5287	-0.16	0.3665	0.7435	0.6421	0.0135	-0.6799	0.0681	-1.1811	0.808	1.005	-0.2848	-0.3383	-1.6447	0.6996	0.1297	0.6039	-0.1048	-1.078	0.5238	-0.6335
P08473	MME	Oncology	-0.5437	0.1843	0.6108	1.3131	-0.2543	-0.7573	-0.3577	0.1983	-0.08	2.4305	-0.7686	-0.2897	-1.2683	-0.3967	0.2102	-0.2679	-0.3787	-1.0424	-0.6582	1.2672	0.7937	-1.0613	2.3838	-0.2844	0.0234	0.3008	0.4916	1.4379	0.5214	0.2333	-0.8042	0.6455	-0.0756	-1.0785	-1.0438	1.4631	0.1591	0.7926	-0.4684	-0.3203	-0.5799	-0.5407	1.1157	-0.3264	-1.0586	-1.4107	1.2868
P08519	LPA	Inflammation_II	-1.5985	-2.5637	-3.0201	0.2291	-0.2724	-0.4247	2.4479	-1.2108	-0.323	-1.7544	1.9	0.8399	-1.5759	2.8699	1.4446	-1.1285	-1.9016	-0.7321	-2.1898	3.311	0.3844	0.8267	-0.5715	-1.1907	-0.106	1.5129	2.0104	1.978	2.6059	-0.5782	0.7473	-1.347	0.3418	-1.5355	1.7379	-0.3588	2.2035	-1.2323	-0.5053	-3.0509	-3.0128	0.1246	1.1602	2.286	-1.5498	1.4936	0
P08571	CD14	Cardiometabolic	-1.1484	0.1444	-0.7235	-0.5491	0.5225	-0.3343	-0.7144	0.3594	0.0384	0.484	0.313	0.907	0.2943	0.1184	0.0946	0.1219	-1.4901	0.1383	0.8756	0.6512	-0.4463	0.252	-0.0972	-0.1256	0.0884	0.269	0.6672	0.7724	0.7122	1.1631	0.2563	0.491	0.0885	-0.4644	1.3598	2.369	-0.1618	-1.0541	-0.3944	-1.0692	0.2378	-0.1236	-0.3627	0.4692	1.832	0.1429	-0.0384
P08575	PTPRC	Cardiometabolic_II	-0.3535	0.2897	0.053	0.061	-0.2414	-0.0629	-0.3307	-0.3321	0.2187	-0.1119	0.0481	-0.0534	0.009	0.23	-0.2352	-0.0259	0.0133	-0.1219	-0.0082	-0.1446	-0.3763	0.2197	-0.3999	-0.9348	0.1371	0.3689	0.103	-0.125	0.4318	0.0825	0.3972	0.6593	-0.0956	0.8773	0.3361	0.3059	0.0993	-0.6737	0.0382	-0.2454	-0.4231	-0.3187	0.0005	0.0704	-0.1688	-0.0299	-0.3095
P08579	SNRPB2	Neurology_II	-0.381	-0.2999	0.0048	-0.2914	-0.3474	-0.2267	-0.6455	0.5093	-0.1186	-0.257	-0.1903	-0.0048	0.5035	0.2322	-0.227	-0.4263	-0.3009	-0.624	3.6059	-0.2677	0.1676	3.6481	-0.4481	0.2597	0.3609	1.2225	1.3215	0.932	1.845	2.9583	1.9374	-0.0569	-0.4307	-0.1628	-0.3223	6.4675	0.6576	-0.5781	-0.5378	-0.648	0.2655	-0.0183	0.2182	1.5709	3.2375	-0.0814	0.018
P08581	MET	Cardiometabolic	-0.2967	0.4638	-0.0547	-0.1398	0.6212	0.0187	-0.3245	0.4642	-0.2867	0.2934	0.204	0.116	-0.0187	0.0894	-0.0774	-0.2459	0.1189	0.0548	-0.4365	0.4656	-0.1006	-0.0336	-0.2022	-0.1047	0.6524	-0.4962	0.0027	0.3552	0.3765	0.6422	0.1659	1.1928	-0.309	-0.1699	-0.1493	0.6843	-0.1383	-0.016	-0.1187	-0.1536	0.0463	-0.4186	0.3518	0.0594	0.2099	-0.0027	0.1193
P08582	MELTF	Cardiometabolic_II	-0.1995	-0.1467	0.1971	0.5121	0.2229	0.2081	0.1861	-0.4245	0.154	-0.075	0.1535	0.5372	-0.1157	-0.3741	-0.1189	0.4537	-0.3932	-0.6062	-0.338	0.4317	-0.9871	-0.8482	-0.6072	-0.2908	0.0038	-0.0647	-0.4503	0.1606	0.252	0.4254	0.0855	0.2583	0.1972	-0.1134	-0.2531	3.2783	0.4166	-0.1294	0.1435	-0.325	-0.3677	-0.3467	-0.4963	-0.349	1.2736	0.4847	-0.2743
P08590	MYL3	Cardiometabolic_II	-0.3823	1.5592	0.9482	-0.0067	1.4411	0.6542	-0.4603	-1.1793	-2.2318	0.0067	-0.513	-0.9323	-0.6066	-0.7009	-1.5777	0.4292	-0.7181	1.535	2.0521	-0.6402	-2.1696	1.0977	-0.2801	-1.2955	1.8051	1.4315	-0.5031	-1.0087	1.1844	2.9082	0.2891	-0.1933	-1.5755	0.9114	-0.8143	1.0314	1.416	0.0437	-0.5472	-0.259	-0.0776	-0.7232	-0.0348	-0.2859	-0.89	-0.9417	-1.569
P08603	CFH	Inflammation_II	-0.3396	-0.2566	-0.0792	0.2619	0.0258	-0.2767	-0.225	1.3525	0.552	0.3003	0.2482	0.0758	0.1784	-0.0344	0.3219	0.141	-0.0473	0.2854	-0.3865	0.3185	-0.0835	-0.3089	1.8685	0.2765	0.5668	-0.0997	0.4532	0.1442	0.6121	0.1434	0.3403	-0.5321	-0.2133	-0.6999	0.4053	0.4624	0.1844	-0.0792	0.1762	-0.7263	0.5424	0.2067	0.1665	0.3055	0.548	-0.2115	0.1743
P08648	ITGA5	Neurology	-0.1871	0.4405	0.4391	0.1729	0.4175	-0.0248	-0.0408	0.3002	0.0101	0.2965	-0.0162	0.2671	0.0733	0.366	0.3149	-0.3549	-0.1076	-0.1043	-0.008	0.252	0.0353	-0.4052	-0.0162	-0.4596	0.2268	-0.6358	0.4442	0.2625	0.9157	-0.0018	0.3693	-0.1135	-0.1781	-0.4072	0.5127	1.0115	0.363	-0.5676	0.2505	-0.7006	-0.0382	-0.2956	-0.2406	0.2812	0.4131	-0.1992	-0.1176
P08651	NFIC	Neurology_II	-0.03	0.2109	-0.0755	0.0268	0.2989	0.1268	-0.07	-0.0522	-0.3807	-0.4786	-0.1253	-0.3431	0.669	-0.2637	0.0409	0.0068	-0.183	0.1755	0.828	-0.2283	-0.0016	0.3738	0.0379	-0.2749	0.0016	0.2124	0.0284	-0.4221	0.0645	1.0057	0.2987	-0.4271	0.4507	1.245	-0.7326	2.0523	1.0302	-0.2899	0.1304	-0.14	-0.0964	0.1411	0.0022	0.0349	0.3973	0.027	-0.0613
P08670	VIM	Cardiometabolic	0.4701	0.0633	0.0963	0.2075	-0.0011	-0.0378	-0.1541	0.983	-0.2511	-0.3261	-0.1009	0.2072	-1.0286	-0.9892	0.1594	-0.4305	-0.3385	-0.2826	2.5984	-0.7556	-0.1884	0.3427	0.0434	-0.0612	0.3408	0.2602	-0.1059	0.1861	-0.1266	0.404	1.1118	1.0958	-1.3614	0.4996	-0.2057	1.1827	0.1595	0.2843	-0.2583	-0.4588	1.2859	-0.4562	-0.051	-0.2564	0.8849	-0.0801	0.2263
P08697	SERPINF2	Inflammation_II	-0.1681	0.1846	-0.1615	-0.0505	-0.1178	-0.4195	-0.0271	1.7865	0.1963	0.0928	0.0036	0.0258	-0.3236	-0.1683	-0.1282	0.1971	-0.2991	-0.0627	-0.2101	0.3201	0.2832	-0.2537	3.09	0.1342	0.4914	-0.0014	0.3096	0.061	0.5991	0.0795	0.0338	-0.2003	-0.0847	-0.476	0.254	0.4166	-0.0565	0.3123	-0.0579	-0.4015	0.1281	0.0282	-0.1406	0.3252	0.6045	-0.1568	0.3616
P08700	IL3	Oncology_II	-1.1751	0.3144	-1.8521	-0.0043	1.2926	0.1276	-1.3689	-0.1024	-0.1939	0.5816	-2.0305	1.3165	0.3989	-1.4249	0.1451	-0.3677	-0.123	0.5506	-0.8892	0.778	0.1435	-1.9868	0.4961	-2.0321	1.0607	0.314	0.7365	0.4003	-0.19	-0.5271	1.2075	-0.7118	0.3088	-0.5191	0.8082	0.6566	-0.0262	-0.1005	0.3589	-1.5878	0.6173	-0.2155	-0.5665	0.6595	0.6548	-0.5332	0.244
P08709	F7	Cardiometabolic	-0.5956	0.9395	-0.0015	0.0284	0.4267	-0.007	0.1096	0.0264	-0.4422	0.3351	0.1895	0.0382	-0.4155	0.0032	-0.0704	-0.0349	-0.4529	-0.4161	-0.7102	0.6454	0.1421	-0.5425	0.1724	-0.5295	0.598	-1.1179	-0.2333	0.1608	0.1706	0.6695	0.1708	0.5364	-1.7602	-0.6968	0.0015	0.4325	0.1557	-0.1975	0.2244	-0.4541	-0.3972	0.1415	0.2451	0.0154	0.6813	-0.2177	-0.1738
P08727	KRT19	Inflammation	-1.8393	-1.6851	-1.0338	-0.8632	-0.7049	-0.0298	-1.5207	2.6029	-0.6238	-1.1526	0.7938	1.4622	3.4069	3.1914	0.319	-0.6678	0.2477	0.0739	4.3243	-0.5705	0.0298	4.2417	-0.0592	1.2099	2.4738	0.2038	1.6041	3.0261	4.1347	2.0334	3.0826	1.3285	-1.5517	-0.5674	0.5165	4.4723	-0.199	-1.7834	-1.249	-0.1138	0.7386	2.4118	-0.9054	4.0346	4.1053	1.3459	0.6663
P08758	ANXA5	Neurology	-0.2276	0.2389	0.1901	0.7666	-0.8641	-0.8644	-0.1849	-0.0921	-0.6665	0.0756	0.6043	0.0378	-0.4037	0.2319	-0.1426	-0.1542	-0.431	0.0567	1.0651	0.4636	0.1358	0.1859	0.6188	-0.223	0.7408	-0.4003	0.4447	0.3584	-0.0009	1.9221	0.6297	-0.4941	-0.0824	-0.5326	0.3064	0.6946	0.6522	-0.375	0.3573	-0.237	-0.6062	-0.0467	-0.2165	0.3126	0.86	0.0252	-0.4113
P08833	IGFBP1	Cardiometabolic	1.46	-1.1229	0.4378	1.0627	0.2265	-1.0496	-2.789	-1.8598	-2.9722	-0.9085	-0.228	1.8602	2.1377	2.666	-2.4805	2.0611	-0.5992	-2.913	3.238	-0.0644	1.67	2.5413	-1.9032	-0.7437	1.7701	0.5774	-0.9428	1.8985	1.0568	1.888	0.1191	1.6889	-1.2899	-0.6037	-1.8636	-0.1846	0.1476	-2.5703	-2.2829	-0.5997	1.0759	-0.6546	-0.8975	-1.4432	2.6077	2.1632	-2.9018
P08887	IL6R	Cardiometabolic	-0.2172	0.167	0.255	-0.3964	-0.1865	-0.4098	0.0712	0.8685	0.2232	0.1829	0.644	-0.2213	-0.5666	0.3182	-0.1352	-0.3889	-0.8215	0.0565	-0.0538	-0.7717	-0.3694	0.0929	-0.5093	-0.9745	-0.4539	-0.4141	-0.3412	-0.2945	0.3542	0.325	-0.5463	0.3014	0.2902	0.0886	0.6078	0.0642	-0.4327	-0.4194	0.3173	-1.0035	-0.2934	0.0156	0.1198	0.051	0.3204	-0.5913	0.3117
P08908	HTR1A	Neurology_II	1.5284	-0.7895	1.0762	0.8696	0.716	-0.6937	-0.9633	-2.1259	0.3667	-0.8957	-0.2513	-1.0839	-0.442	0.154	0.0361	-0.1169	-1.4101	3.4289	1.5326	-0.9288	-0.1733	0.7846	0.9872	-1.3889	0.6199	-0.2125	0.0453	0.6638	-0.7659	3.3266	-1.7169	0.1626	-0.0361	-0.6541	0.2658	0.2435	-0.0938	-1.1202	4.9718	-0.2063	-0.1658	2.047	-1.4824	2.6322	1.5692	-0.7753	2.0747
P08913	ADRA2A	Cardiometabolic_II	0.4386	-0.5872	1.5906	0.6458	-0.3618	-0.9313	1.1663	-0.6946	-0.8476	1.2388	2.9073	1.827	-0.8762	-1.2275	0.1932	-0.6101	0.9686	0.0959	-0.0785	-0.749	0.3559	1.9385	-0.0487	-0.4355	-0.008	1.6487	-0.4311	-0.2158	-0.4685	0.008	0.4241	1.7001	-0.6138	-0.4253	0.0691	1.4612	0.9912	0.7688	-0.7626	-1.2851	-0.7468	-0.1838	0.4554	-0.4568	-0.2042	0.907	0.5265
P08962	CD63	Neurology	-0.4937	0.3185	-1.1224	0.3228	-0.3607	-0.0359	-0.9431	0.01	0.2019	-0.5743	-0.2986	0.3771	-0.7801	0.502	-0.3813	-0.4386	-0.6715	-1.2278	-0.5368	-0.123	-0.6974	0.6169	-0.1358	-0.097	0.6782	0.3513	0.5299	0.1884	0.3845	-0.1779	-0.5214	-0.1948	-0.7059	0.0998	1.3664	0.7673	0.1363	1.0228	-0.6358	-0.6192	-0.0677	0.0831	-0.149	0.8151	0.1552	-2.0217	0.1262
P09038	FGF2	Inflammation	1.0509	-0.1474	-0.2292	0.2998	0.0261	-0.0197	-0.0861	0.0023	0.0775	0.0589	-0.2778	0.1938	0.0083	-0.4571	-0.0995	0.0101	-0.5048	0.5968	-0.1067	-0.1925	0.2689	-0.2375	0.0724	-0.0166	0.0536	-0.278	-0.0836	0.1567	0.4429	0.0589	-0.2189	-0.0606	0.0004	2.0835	0.1512	-0.0894	-0.0825	0.6579	-0.3569	0.0666	0.1611	-0.1327	1.0416	-0.361	0.2853	-0.3635	0.3304
P09093	CELA3A	Cardiometabolic	-1.2149	0.3703	-0.9522	-1.3223	-0.1199	0.16	0.3793	-1.3251	0.5251	-0.1625	0.2276	-0.3994	-0.2096	-0.6655	-0.7178	1.1202	-1.2968	-0.0209	-0.3064	0.815	-0.4948	-1.8965	1.5387	1.3609	0.2688	-1.4162	0.8657	-0.2457	0.5546	-0.3677	-2.6862	-0.369	0.7401	-1.0482	2.2645	2.8399	1.2398	0.8601	0.3434	-1.4226	-0.6401	-0.3208	1.0446	0.4424	1.1685	-0.3934	-0.5252
P09104	ENO2	Neurology	0.6623	0.0292	-0.1728	-0.0054	0.0966	0.6791	-0.6818	0.2059	0.8403	-0.5571	-0.5842	-0.1021	-0.9361	-0.6764	0.3078	-0.2738	-0.0804	-0.5358	2.0574	0.2334	-0.5931	-0.2545	-0.7155	-0.1038	-0.002	0.002	-0.1317	0.0709	1.0408	0.5824	0.1908	-0.1154	-0.365	-0.968	0.404	5.4779	1.0648	1.3879	-0.4864	-0.3783	0.1743	-1.0328	0.37	0.6308	1.2309	0.1137	-0.5089
P09105	HBQ1	Oncology	0.1919	1.1962	0.2608	0.497	-0.1609	0.7369	0.2348	-0.0408	-0.3509	-0.1186	-0.0431	-0.0415	-0.4895	-0.7268	1.072	0.3674	0.7133	0.4197	1.5389	1.0851	-0.371	0.2218	0.2047	-0.5764	-0.5904	-0.2305	-0.7563	-0.1838	0.8646	1.2307	1.0889	0.1364	-0.5456	-0.3077	-0.8976	0.2621	1.0817	-0.6053	-0.5952	-0.5976	1.2998	-0.814	1.3629	-0.5071	-0.7	0.4482	-0.3066
P09110	ACAA1	Oncology	0.7415	0.8426	0.5235	0.7084	-0.0627	0.6135	0.2017	-0.34	-1.7965	3.5141	-0.5778	-0.8482	-1.6239	-1.1973	-0.2424	-0.4781	0.278	-0.819	-0.449	-0.7328	1.9763	0.7758	0.2018	-0.8437	0.7524	-0.1439	1.2605	-1.1593	1.0712	1.4407	-0.7593	1.8555	-0.1615	-0.4581	0.1094	1.3864	1.1508	2.3305	-0.6779	-3.5715	1.5082	-0.0275	1.4928	-0.379	-0.2113	-1.5143	0.7693
P09172	DBH	Inflammation_II	0.2682	0.4159	1.925	0.2319	-0.7503	0.9329	0.3837	0.3386	-0.3007	-0.698	-4.9381	0.6369	-0.2021	-0.154	0.0101	0.1098	-0.4605	-0.5653	0.0687	0.5032	-1.5823	-1.4002	1.0239	-0.3087	-1.541	1.0014	0.3974	0.3557	0.5917	1.7004	-1.8141	0.152	-2.136	-0.4825	-0.6979	0.9127	-3.1525	-3.491	1.3571	0.2516	1.1457	-2.7271	1.4027	-1.3839	-1.2336	0.1353	0.459
P09211	GSTP1	Neurology	-0.3689	-0.4095	1.0057	0.0293	0.1055	-0.4573	-0.2664	0.3561	1.2255	-0.4232	1.5114	-1.2701	-0.1015	-0.7123	-0.2421	-0.2483	-1.2017	-0.4297	2.1528	0.9514	-0.7101	0.6799	0.1364	-0.8821	0.1055	-0.5074	0.1193	0.7747	0.4254	0.2174	0.4053	-1.6679	2.4459	-1.2279	0.6735	3.2478	0.709	0.8947	-0.3974	-0.3804	-0.3269	-0.0344	-0.469	-0.237	0.8182	-0.8873	-0.4017
P09237	MMP7	Cardiometabolic	-1.0579	-0.5037	0.5534	-1.5429	-0.1458	-0.3971	-0.2631	-0.3754	0.0481	0.1466	-0.1578	0.7348	0.1714	0.1076	-0.1275	0.3142	-0.0879	-0.8117	0.4169	0.0387	0.4178	0.3044	-0.2233	1.1452	0.2883	0.5844	0.3933	0.4872	0.1694	0.4219	0.0989	-0.9804	-0.9413	0.0187	0.4379	0.7291	0.2701	-0.2676	0.2901	-0.516	-0.0023	-0.4314	0.0744	0.028	0.69	-0.2472	-0.547
P09238	MMP10	Inflammation	-0.9622	-0.3445	-0.2327	-0.8949	1.1774	-0.611	-0.2402	1.4908	-0.0788	-0.3325	0.2984	1.3414	1.9634	0.1335	0.1019	-0.494	0.1899	0.0601	2.2163	-0.3833	0.4783	5.4087	-0.229	-1.3042	0.6727	1.4341	-0.2484	1.2045	2.6095	0.8845	0.2034	3.0247	-0.997	-0.3619	0.1755	-0.179	1.2535	-0.9061	-0.3682	-0.7469	0.3107	0.1315	-1.2964	0.5151	4.9779	0.4604	-1.1022
P09326	CD48	Inflammation	-0.1703	0.3185	0.3152	-0.245	0.2588	0.0249	-0.0886	0.0285	-0.3487	-0.0825	-0.1969	0.3645	0.2835	0.0246	-0.2473	-0.0515	-0.2587	-0.4283	0.232	-0.3671	-0.3847	0.4929	0.2893	-1.2631	0.4403	0.6875	-0.8094	-0.3522	0.7937	0.9113	0.5099	0.525	-0.1411	1.1996	0.0105	0.1298	-0.0221	0.4255	-0.3725	0.232	-0.2521	-0.2161	0.2169	0.1007	0.04	0.2771	-0.886
P09341	CXCL1	Inflammation	1.7973	1.9126	-0.6152	-0.6717	0.5498	0.4092	-0.2055	-0.1419	-0.4281	-0.0848	-0.2265	0.094	0.1554	0.106	-0.2783	-0.7809	0.1256	-1.2206	2.882	-0.2972	6.3531	1.8354	-0.8634	2.4841	-0.1724	1.3782	0.6012	0.5376	0.702	0.0278	-0.5288	0.479	-0.1513	0.2209	2.5574	0.1917	-0.2954	1.7835	-1.0245	0.2687	-0.2542	-0.2657	0.0255	0.5317	3.9052	-0.7196	0.2479
P09382	LGALS1	Cardiometabolic	-0.337	0.3388	0.3112	0.0148	0.1066	0.0962	-0.1456	0.1253	-0.8326	-0.0417	-0.1394	0.2269	0.12	0.1856	0.0649	-0.3522	-0.0615	-1.0779	0.735	-0.2802	-0.3104	0.5428	-0.4812	-0.8853	0.7335	0.717	0.572	0.1695	0.8689	1.8752	0.1509	-0.0536	-0.2084	-0.2948	0.1843	0.3087	0.4868	-0.3313	-0.2275	-0.1313	-0.2696	-0.3206	-0.3324	-0.4438	0.715	-0.4295	-0.1199
P09417	QDPR	Cardiometabolic	0.3685	0.2958	0.1316	0.237	-0.1999	0.7659	-0.6976	-0.1292	-0.1259	-0.2367	-0.3347	-0.2232	-0.8335	-0.4303	0.4157	0.138	0.0679	-0.4589	1.7789	0.1078	-0.4953	-0.7291	-0.4045	-0.2445	0.2785	-0.0261	-0.6248	-0.0363	0.2961	0.8245	-0.1292	0.047	-0.22	-0.2598	0.1484	2.2443	0.8182	1.0141	-0.3218	-0.8369	0.1984	-0.8096	0.402	-0.0083	-0.1692	0.4342	-0.3231
P09455	RBP1	Neurology_II	-0.5399	-1.0936	-0.4982	-0.5376	-1.7863	-0.158	-1.0583	5.3999	-0.2514	-0.0093	0.0093	1.132	0.7246	0.426	0.0364	0.4828	0.1393	-0.1755	3.3745	-0.0411	0.1709	4.5391	-0.3916	-0.7169	-0.1787	1.3751	-0.0172	0.9653	1.1722	1.1795	0.4846	0.6082	-1.7957	-0.2964	0.2946	7.1318	0.5309	-0.0952	-0.0484	-0.4326	-0.9379	0.3582	-0.3927	-0.38	3.4771	0.5843	0.206
P09466	PAEP	Neurology	-0.7418	0.3914	0.7978	-0.7891	-1.0096	-0.929	-1.1425	0.2986	0.1024	0.3891	-0.5488	1.4478	1.9738	1.5371	-0.8137	-0.2432	0.6093	0.3496	1.0218	-0.5216	-0.8889	2.2651	0.2808	-0.1024	-0.534	0.2133	1.1464	2.4133	2.8353	1.4768	0.5306	0.8351	-0.8678	0.9976	-0.1537	1.2731	2.383	-0.3977	-1.3678	0.4061	1.8716	0.9561	-0.9327	-0.593	1.7544	1.0669	-0.6412
P09467	FBP1	Cardiometabolic	-0.7762	0.7876	-0.3749	0.3304	0.1153	0.3711	0.1991	-0.5158	-0.5585	0.1582	-0.6622	-1.7646	-0.0984	-0.0925	-0.2684	-0.7301	-0.8275	-1.5962	-1.0223	0.0234	2.1878	0.4303	-0.1737	-0.5131	1.1963	0.81	1.1823	-0.4107	2.2874	-0.3709	-0.1105	0.5292	-0.3862	0.9597	-0.5928	1.6992	2.4164	-0.331	0.5082	-0.0409	2.0406	-1.1289	0.9735	-0.0971	-0.2736	-0.8514	0.2985
P09486	SPARC	Oncology	1.4787	1.5729	-0.1927	-0.2214	0.4443	0.0407	-0.837	0.3059	-0.0539	-0.2872	-0.5869	1.6863	-0.913	-0.7675	0.0524	-2.2612	-2.0512	-0.8093	1.4952	-1.1331	-0.184	-0.3168	-0.747	-1.8153	-0.642	-0.349	-0.3385	0.1791	0.7452	1.3144	-0.1187	-1.2665	-0.2966	-0.1083	2.7109	1.2297	0.2308	1.3726	-0.5621	0.9366	1.5665	-1.3661	-1.0177	-0.7058	1.2899	-0.9059	0.0618
P09496	CLTA	Cardiometabolic	0.3283	0.1414	-0.0674	0.0543	-0.2389	0.9015	-0.4391	-0.5783	-0.2865	-0.4609	-0.482	-0.3311	0.3506	-0.2576	0.118	-0.0507	-0.6962	-1.1091	1.5289	0.1069	-0.9036	0.5343	0	-0.551	-0.1005	-0.0471	0.1436	0.0243	-0.0375	0.969	0.3741	0.3735	-0.034	-0.6202	0.234	1.708	0.1488	0.8557	-0.5462	-0.724	0.188	-0.4831	-0.0967	0.1514	2.5272	-0.678	-0.2281
P09525	ANXA4	Cardiometabolic	1.304	0.306	-0.7747	0.8012	0.4417	0.4916	-0.9371	0.4515	0.1459	-0.1275	-0.5841	-0.0242	-0.2665	-0.5723	0.2114	-0.5415	-0.1086	-0.4192	1.107	-0.3516	-0.6556	-0.3557	-0.2325	0.0006	-0.2951	-0.3007	-0.3862	-0.6803	0.5484	0.4787	1.636	-0.199	-0.1057	0.4218	0.8955	0.1812	0.4036	2.2984	-0.4703	0.0746	0.6732	-0.5491	0.1551	-0.7252	0.045	-0.6775	-0.4818
P09529	INHBB	Inflammation_II	-0.6854	-0.3026	0.7838	-0.2362	1.7345	0.0503	-0.5017	2.0656	-0.4147	-0.3584	0.0636	1.8276	0.8168	0.8151	-0.1375	-0.3079	-0.3879	-1.3623	1.6819	-0.5366	-1.1475	1.497	0.9411	-0.6758	1.4382	1.9105	0.5024	0.9993	1.9735	2.5178	0.6572	-0.2483	-1.2691	0.3807	-0.7207	1.5228	0.4438	-0.1396	-0.2672	-0.7256	-0.1951	0.7836	1.0663	-0.195	1.6314	1.4879	-0.0954
P09543	CNP	Cardiometabolic_II	0.8018	-0.2269	-0.659	0.8511	-0.2898	1.6102	-1.6544	0.2421	0.7288	-0.6794	-0.413	-0.0552	-0.6736	-0.5497	0.1739	-0.3737	0.4736	-0.1533	2.0647	0.0911	-1.0471	-0.4445	-0.0923	0.1727	-0.0542	-0.1226	-0.3426	-0.1665	0.5918	1.8089	1.6438	-0.1451	-0.3087	-0.0346	-0.0132	1.3506	1.2467	1.6273	-0.7058	-1.01	1.4309	-1.2342	0.8881	-0.3557	0.0772	0.6441	-0.4168
P09564	CD7	Inflammation_II	-0.3652	-0.5806	-0.2769	-0.2122	0.194	-0.1508	-0.5728	-0.0563	-0.4435	-0.0887	-0.4277	0.3138	0.4205	0.0826	-0.0378	-0.5564	-0.6753	-0.7715	0.5488	-0.879	-0.5331	0.7884	0.5906	-0.8356	0.1877	1.3009	0.1747	-0.1185	0.4719	2.4089	0.794	0.4281	-0.8496	0.5759	-0.264	0.0903	0.0604	-0.7903	0.0429	-0.961	0.0851	2.9433	-0.8267	0.0651	0.3429	0.2057	-0.3366
P09601	HMOX1	Cardiometabolic	0.0023	1.4499	0.2424	-0.1377	0.7992	-0.0205	0.0077	-0.5458	-0.0795	0.3757	-0.6911	-0.1728	-0.2019	-1.0744	0.0389	-0.2527	-0.0568	-0.0656	1.0384	-0.1145	-0.534	0.9047	0.5939	-0.6268	0.1721	-0.0896	0.4218	0.1596	0.702	0.9263	-0.3859	0.7502	0.0624	-0.5235	-0.8493	1.5028	1.2502	-0.1295	-0.4858	-0.233	-0.0273	0.4332	0.4036	-0.1501	0.1975	0.0081	-0.8602
P09603	CSF1	Inflammation	-0.688	-0.1623	-0.0192	-0.0999	0.0505	-0.0912	-0.3479	0.37	-0.0564	0.0286	0.0878	0.3063	0.6671	0.1816	0.0811	-0.3428	-0.4758	-0.1368	0.6382	0.133	-0.2912	0.8156	0.7962	-0.3381	0.2319	0.9035	0.2192	0.3117	0.7278	0.7996	0.3059	0.943	0.1834	-0.1733	-0.2798	1.0942	-0.0677	-0.4681	0.0649	-0.4583	0.1262	0.0812	-0.4863	0.8128	1.4437	-0.1784	-0.4284
P09619	PDGFRB	Cardiometabolic	-0.1495	0.5102	0.5759	-0.4174	0.4523	0.4804	0.096	0.4191	-0.082	0.212	0.5607	-0.051	-0.1417	-0.4267	0.3159	0.0426	-0.7735	-0.1283	0.2847	0.515	-0.215	-0.0821	0.2711	-0.7963	0.2723	0.2678	-0.0862	-0.0847	0.7258	0.7033	-0.3638	0.2315	-0.4513	0.4023	-0.201	-0.0552	0.5966	-0.8175	0.5329	-0.1372	-0.818	-0.6238	0.1931	-0.0204	0.3243	-0.3223	0.2792
P09668	CTSH	Cardiometabolic	-0.169	-1.3392	0.4633	0.1657	-0.0539	-0.149	-0.6458	-0.0932	0.2085	-0.2334	-0.8393	0.1912	-0.3923	0.4701	0.4958	0.3597	-1.4647	-0.5515	-0.3662	-1.2832	0.2519	-0.3656	-0.2648	0.7901	0.882	1.1715	0.6925	-0.5242	1.7286	-0.1562	-1.3727	0.2808	-0.3625	0.7386	1.1963	1.722	-0.1009	-0.3224	-0.2033	-0.2895	-1.102	0.3714	-0.5077	-0.3213	2.064	-0.7485	-0.814
P09681	GIP	Cardiometabolic_II	-0.3895	0.5482	1.3971	0.0068	-0.3395	-0.5024	1.5925	0.0891	0.0458	0.6479	0.0451	-0.2665	-0.9088	2.9391	-0.95	0.5533	0.9239	-0.7195	-0.7825	-0.8665	-0.6636	-0.9496	0.8323	-0.2767	1.15	0.6351	-0.4965	0.2951	1.0483	-0.4635	-0.5318	0.3255	0.0701	-0.1134	-0.3626	-1.5261	-0.0416	0.5238	0.5954	0.8724	0.0124	-0.2795	0.3904	-0.4638	-0.6947	-0.1749	0.1683
P09683	SCT	Neurology_II	-0.1082	0.995	0.6701	-0.0434	1.3194	0.0326	-0.1446	-0.051	0.3171	-0.5151	0.5183	2.5999	-0.9502	-0.7118	0.5968	0.9636	-1.1215	-0.4206	0.6473	0.4512	0.1008	2.0625	-0.2343	-0.2976	0.7994	-0.8504	0.8161	1.2525	1.5047	0.4262	-0.5166	1.0546	0.3913	-0.8574	-0.1203	-0.1703	-0.7907	-0.8906	-0.2844	0.0453	-0.2431	0.0931	0.8709	-1.0059	0.2595	-0.9494	-0.5705
P09693	CD3G	Inflammation_II	-0.3693	0.2706	-1.1242	-0.6895	-0.3095	0.3684	0.4725	0.5429	0.0325	0.5198	-0.8142	-0.4066	1.2478	-0.5961	-0.1523	-1.016	-0.5828	0.4417	1.9677	-1.0503	-0.0325	1.1121	0.4244	-1.4455	-0.0421	-0.1623	0.2217	-1.1131	0.1365	-0.0611	-0.1247	0.8875	0.1872	-1.1454	0.3235	0.0418	0.2936	0.1486	0.4507	0.5264	-0.7118	1.7355	1.5331	-0.2599	-1.143	-0.6319	-0.2046
P09758	TACSTD2	Oncology	-0.2064	0.5462	0.402	-0.1318	0.5703	-0.2758	0.033	1.1238	-0.2974	0.3979	-0.2775	0.3882	0.6661	1.0873	-0.4446	-0.4037	0.2845	-0.7285	2.241	-0.1441	-0.1997	2.6371	0.0682	0.6673	0.4763	0.3448	1.809	0.5626	1.3776	0.6308	-0.3627	0.2063	0.0725	-0.334	-0.0121	-0.6183	-0.3446	-0.3133	-0.3926	-0.4112	-0.3635	0.2531	-0.2791	0.4641	3.3184	-0.2169	-0.1088
P09769	FGR	Neurology	-1.1247	-0.7552	-1.1753	0.1404	-0.3561	-0.3647	-1.2192	0.3032	-0.1749	0.1598	1.0417	0.5627	0.3789	0.287	1.6977	-0.9535	0.1688	-0.0418	1.2262	0.0951	-0.5746	-0.1034	0.0291	-0.2667	0.1075	0.3014	0.3268	-0.0232	-0.029	1.6101	1.9314	0.1164	-0.7584	-0.2024	0.1322	0.7108	0.2528	0.2649	-0.9512	-0.2362	1.7289	-0.8171	-0.0487	0.249	0.4561	0.6311	0.3017
P09871	C1S	Inflammation_II	-0.6031	-0.2874	-0.3869	-0.0102	0.2191	-0.2639	-0.2554	1.3938	0.1235	0.4069	-0.0048	0.189	0.1891	-0.171	0.1247	-0.0414	-0.2825	0.0385	-0.6269	0.287	0.1304	-0.2287	1.5471	-0.1455	0.1308	0.1128	0.0868	0.2667	0.4512	0.0912	0.1708	-0.514	-0.0249	-0.4522	0.2985	0.3699	0.2694	-0.1546	-0.2361	-0.733	0.4492	-0.053	0.0346	0.2397	0.5138	0.1048	0.3746
P09874	PARP1	Inflammation	-0.044	-0.0106	0.2294	0.1423	-0.2248	0.2144	-0.4186	-0.0144	0.1676	-0.2767	-0.2849	-0.2804	0.8091	-0.4264	-0.1307	-0.0382	-0.5733	-0.0916	1.2743	-0.4621	-0.2133	0.7523	-0.6024	-0.184	0.155	0.0669	0.8842	0.912	1.0648	1.2725	1.0286	-0.2706	-0.3881	0.3138	-0.327	5.6789	0.7981	0.0371	-0.1875	-0.5173	0.5773	-0.2183	0.4111	0.8589	2.166	-0.0198	0.1756
P09919	CSF3	Inflammation	-0.6331	-0.0997	0.0077	0.2209	-0.8097	0.0584	0.415	0.1534	0.8713	-0.2916	0.2222	-0.8334	-0.7373	0.053	0.266	-0.0077	-0.1069	-0.3422	1.0673	0.9169	-0.2381	0.4719	0.8551	-0.1372	-0.2575	0.2699	0.7505	-0.5295	0.4666	-0.661	0.5838	0.39	0.5108	-0.4547	-0.5041	0.2381	0.191	-0.3203	-0.1591	-0.3025	0.5484	-0.9756	0.2547	-0.4213	0.6544	-0.7654	1.4347
P09923	ALPI	Inflammation_II	-1.0021	1.2788	0.2578	-0.0515	2.3963	-1.5323	0.6481	0.3688	-1.8801	0.6072	-1.21	1.0637	0.383	-1.5044	1.7982	2.8591	1.6207	-0.6132	1.281	-2.4113	-2.5399	-1.1931	0.1687	0.7497	2.0467	-1.2461	-2.17	-2.3781	0.2956	3.4097	-1.4055	-0.5778	1.669	3.1023	0.9516	-2.2339	-0.4589	-0.2638	0.0435	-1.4992	0.5668	-1.9549	-0.4275	-1.3855	-1.5346	-1.7947	2.8427
P09958	FURIN	Oncology	-0.7183	0.7103	0.2478	-0.5666	-0.2323	-0.788	-0.4209	0.3251	0.5107	0.4374	-0.3118	0.0797	-0.2222	-1.0143	0.2757	-0.483	-0.6514	-0.4359	0.3056	0.6664	-0.2375	-0.3106	0.0028	0.2409	-0.0316	0.1031	0.1859	-0.0671	0.7018	-0.2871	0.5758	-0.5696	-0.3371	-0.3268	0.0146	0.3587	0.076	-0.2268	0.4678	-0.9245	-0.132	0.0466	-0.1895	0.3783	-0.0967	-0.3711	0.1327
P09960	LTA4H	Oncology	1.5741	-0.4995	1.3006	1.0609	2.6102	2.953	2.1194	-0.9715	-1.1148	-1.5501	-1.2718	-0.7669	-0.9859	-0.5809	-0.4883	-0.0599	2.5197	-1.1243	1.1208	-0.0605	0.7972	1.046	-1.8558	-1.2873	2.6671	-0.3897	-0.4028	-0.913	0.4494	-0.9691	-0.4476	-0.3381	0.4965	-0.5475	-0.34	0.4565	-0.7801	-0.9867	-0.7444	2.1608	0.668	-1.0187	1.717	-0.5568	0.3556	0.0874	-0.702
P0C7L1	SPINK8	Cardiometabolic_II	0.3882	0.0874	-0.3492	0.0873	0.1495	-0.6311	0.421	0.3788	0.095	-0.1378	-0.6707	-0.0878	0.1311	-0.8208	-0.2247	0.4424	-0.3831	-0.211	0.1925	-1.1265	0.063	-0.504	0.8408	1.0273	0.6063	-0.3516	0.1559	1.537	0.5606	-0.6977	0.1549	0.7704	-0.1054	0.3381	-0.67	-0.1319	-1.1942	-0.6806	-0.0854	0.5583	-0.5436	-0.0093	0.1353	0.5292	0.3107	0.2289	-0.2909
P0C7M8	CLEC2L	Neurology_II	-0.1722	0.5416	0.1359	0.331	0.52	-0.6556	-1.078	0.5572	-0.2771	0.1696	-0.15	0.051	-0.1323	-0.3899	0.6148	-0.5839	0.9486	0.4281	0.5846	-0.0752	0.3773	-0.0579	0.3126	-0.2201	-0.3384	1.1916	-0.4778	1.088	0.2729	-0.2628	0.1504	2.7247	-0.3826	-0.5031	-0.3139	0.5396	0.2294	-0.2678	-1.1577	-1.5921	-0.1258	0.732	-0.8292	0.8973	0.5631	-0.3624	0.6218
P0C862	C1QTNF9	Inflammation_II	-0.1282	0.6482	-0.0529	0.4884	1.3031	0.2974	0.1254	1.0169	-0.2456	0.1332	0.5452	-0.5142	0.1055	0.2482	-0.9834	0.1467	-0.2456	-0.374	-0.9404	-0.1424	-0.5885	-0.0526	0.9557	-0.2573	0.4159	0.2547	0.3046	-0.4454	0.596	1.0358	0.1966	0.0507	-0.4157	-0.1772	-1.2086	-0.5243	0.3875	-0.0995	0.2229	-0.6289	-0.6833	-1.0303	-0.8386	0.0122	-0.5863	-1.0465	-0.4405
P0CG30	GSTT2B	Neurology_II	1.328	1.9568	-3.6948	-3.2135	1.5822	2.4337	-2.643	1.7205	0.1429	0.4231	-1.0432	1.343	-0.6386	-0.2912	1.4912	-2.9005	-2.7932	0.8617	2.1932	-1.0211	1.02	-2.9434	-0.6466	0.0027	0.633	-2.847	-2.5149	0.0199	2.395	-1.3857	-0.2373	1.4735	-3.0186	-0.7355	-2.4614	2.2247	-1.9397	3.304	0.4082	0.9797	1.2913	-1.2238	1.2392	1.2281	0.7733	-0.3323	-2.4653
P0CG37	CFC1	Oncology	-0.6155	-0.0943	0.016	-0.4439	0.0942	0.7223	0.1222	-0.4266	-0.0757	-0.1295	-0.4531	-0.0503	-0.6636	0.2971	-0.2207	-0.1479	-0.3216	-0.5849	0.5393	-0.6848	-0.4192	-0.0565	0.4635	0.1955	0.4148	0.6581	0.5633	-0.4445	0.2137	1.742	-0.6404	0.2275	0.1927	-0.6208	-0.2878	3.0996	0.2754	-0.0396	0.2581	-0.2882	0.0155	-0.2787	-0.0973	-0.2806	1.1709	-0.3404	-0.2972
P0DJD7	PGA4	Inflammation_II	-0.9244	0.0089	0.2363	-0.0561	0.1346	3.1975	0.8925	0.3263	-0.3729	1.4875	0.297	1.285	-0.8234	1.5774	-0.5612	0.4735	0.7254	-1.0783	0.5553	-1.0401	-0.6026	-0.114	2.1094	-0.8512	0.4861	1.2147	-0.4417	-0.3264	0.1778	2.8849	-0.0349	-0.22	-0.9929	-1.1906	0.2083	-0.2319	1.0799	0.347	0.1881	-0.9149	1.8461	1.1841	-0.672	0.1124	-0.2985	-1.0269	0.8898
P0DKB5	TPBGL	Neurology_II	0.2998	-0.3171	0.7371	0.0532	0.0768	-0.3165	-0.807	-0.5869	-0.6162	0.0114	0.3629	0.1648	0.5689	0.2365	0.3154	0.5091	-0.474	-0.3519	-0.1444	-0.4494	0.5481	0.2967	-0.9449	0.2757	-0.6749	-0.2033	0.5021	0.5327	-1.8165	0.8012	0.1535	-0.3529	-0.097	-0.0502	0.9314	0.1107	-0.8399	-0.2065	0.5191	-0.3382	-0.4194	0.1136	-0.6491	0.8573	0.4056	0.0539	-0.2517
P0DML2	CSH1	Inflammation_II	0.9389	0.8894	0.9217	0.1364	-2.0461	-0.1913	0.5632	-1.2509	-2.5428	-0.5137	-0.2369	0.4177	-0.5974	-0.6678	-0.1561	-0.9321	-0.1949	-0.237	-0.6354	0.3813	-0.3138	-0.1441	0.6543	-0.1038	-0.5002	-0.8557	0.9594	0.4114	-1.3514	1.8707	0.5175	0.9273	-0.354	-0.6104	0.0287	-1.4241	1.0981	0.2079	0.7458	0.9006	0.4307	-1.827	0.1865	-0.0427	0.2959	-0.9627	0.7733
P0DMV8	HSPA1A	Inflammation	0.0344	-0.02	-0.1189	0.2987	-0.0334	0.3537	-0.5754	0.2104	0.009	-0.3757	-0.2817	-0.522	-0.2036	-0.4193	0.2557	-0.3794	-0.0822	-0.8703	1.8577	-0.3441	-0.4116	0.4572	-0.3187	-0.3395	0.0988	0.2994	0.372	0.0005	0.5914	0.877	0.8118	0.21	-0.2536	-0.3884	0.4029	2.4875	0.4071	0.6187	-0.375	-0.0005	0.3181	-0.5472	-0.0891	0.1534	1.7637	-0.2344	-0.5221
P0DN86	CGB3_CGB5_CGB8	Inflammation_II	0.3091	-0.4007	0.5833	0.144	0.1314	0.4172	1.4051	0.3531	0.0296	-0.9058	0.6357	-0.9781	0.1904	-0.5862	-0.7464	-0.3681	-0.7317	-0.2294	1.3901	0.9284	0.4028	1.3582	-1.0361	1.6042	0.1565	-0.3209	-0.3226	1.0039	0.1274	9.0369	0.7157	0.1627	-0.4619	-1.0372	-0.2455	0.2209	0.0814	-0.4626	1.1844	-0.6852	-1.2462	-0.1641	-0.4767	-0.1067	-0.6185	0.1274	0.2361
P0DOY2	IGLC2	Inflammation_II	-0.0261	0.1592	-0.226	-0.1748	-0.1425	-0.0614	-0.0043	0.5276	0.4128	-0.1299	-0.1046	0.1064	1.0074	-0.2158	0.3566	-0.0692	-0.3891	-0.2845	0.3846	-0.1499	-0.2743	1.6316	-0.1955	-0.5084	0.5568	0.6874	0.0043	0.2669	0.3255	1.0094	0.2421	0.1769	-0.113	-0.1775	0.1777	-0.0815	0.2299	-0.3647	0.1067	0.7242	0.1165	-0.0182	1.3291	-0.0343	0.9307	0.2872	-0.0351
P0DPI2	GATD3	Cardiometabolic_II	0.7155	0.0056	-0.3798	-0.3897	-0.1122	-0.2913	-0.2464	-0.1858	-0.1048	0.1784	-0.2471	-0.3543	0.1233	0.3097	0.2066	-1.0344	-0.7513	-0.1952	1.5777	-0.7724	-0.3548	0.8125	0.0696	0.1783	0.7088	0.1526	0.7145	-0.0055	0.0629	-0.218	0.4874	3.3098	-0.4822	0.0887	0.2483	5.5901	0.3111	1.6576	-0.5353	-0.397	-0.3246	-1.1676	-0.2749	1.001	1.5798	-0.5648	0.0202
P0DUB6_P0DTE7_P0DTE8	AMY1A_AMY1B_AMY1C	Inflammation_II	0.699	-0.0752	-0.098	-0.0786	-0.111	0.0997	-0.1119	-0.3349	-0.1442	-0.2957	-0.0203	0.3239	2.045	0.1212	-0.493	0.4297	-0.1403	-0.0794	-0.5822	-0.2499	-0.0928	-0.4951	0.1924	0.927	0.1368	-0.2834	-0.2195	-0.3191	0.048	0.9235	0.9953	-0.6204	0.1654	-0.2795	0.3712	0.2766	1.0719	0.0031	-0.0934	-0.2281	-0.0032	-0.28	0.075	-0.3118	0.9876	-0.0496	0.0823
P10070	GLI2	Inflammation_II	-0.1956	0.0221	0.8377	0.0131	-0.0978	-0.1901	-0.1188	0.1012	-0.1338	0.6877	-0.1663	-0.1406	0.0022	-0.2916	0.6744	0.1788	-0.036	-0.2686	0.1118	-0.3714	0.1321	-0.5106	0.4464	1.0788	-0.0644	-0.0733	-0.2767	-0.2147	-0.1467	0.4582	-0.2276	-0.0688	-0.105	0.4141	-0.2474	-0.1086	-0.0022	0.1074	0.4175	-0.5485	-0.1631	-0.0581	-0.2185	-0.245	-0.2398	-0.0965	-0.0049
P10082	PYY	Cardiometabolic_II	-0.1167	2.7674	2.1157	2.1954	-0.8754	-0.101	1.7476	-0.4591	1.6944	-1.284	-2.0809	-1.3688	-0.9248	1.6719	0.0462	1.8278	0.4913	-0.4323	-0.2461	-0.8675	-1.7016	3.0417	2.9814	0.1905	1.24	1.823	-0.7471	1.3889	-0.0524	-0.1862	-1.5478	3.297	-2.1555	-1.2775	1.2158	1.237	3.8285	0.6928	-0.109	0.5361	-0.6724	-0.7309	0.7805	2.1374	-0.0654	-0.0455	0.3265
P10092	CALCB	Neurology_II	-0.9405	-0.2174	0.1298	0.0057	-0.0013	0.0444	0.2865	-0.3488	0.325	-0.2105	-0.5084	0.4453	0.0191	0.8962	-0.2644	0.0066	0.0218	-1.1391	2.1726	-0.4527	-0.7566	0.9529	0.0556	-0.367	0.7734	1.6033	0.1233	0.1652	0.452	2.4658	-0.1247	1.3269	-0.1187	-0.0299	0.0722	5.5887	-0.101	-0.3076	-0.0939	-0.5603	-0.6172	-0.1956	0.0878	-0.0251	0.2888	-0.2149	-0.3763
P10109	FDX1	Cardiometabolic_II	-1.0306	0.0584	0.0517	0.1922	-0.3454	-0.6687	-1.0193	-0.0784	-0.2201	0.3131	-1.1304	-0.0159	-0.2493	0.1325	0.0236	-0.2384	-0.7155	-0.2855	1.5608	0.4873	1.4014	1.7611	0.0161	-0.689	0.7381	1.5239	0.3871	-0.2	0.3675	2.5178	0.274	1.1558	-0.8256	-0.7703	-0.4988	2.3393	0.1129	-0.5154	0.0695	-0.4362	-1.8855	-0.0118	0.1028	0.3478	1.2437	-0.7477	0.5206
P10145	CXCL8	Cardiometabolic	-1.4742	-0.0898	-0.4506	-1.0818	-0.3337	-0.7648	-0.7463	0.2832	-0.0483	0.6705	0.2474	-0.2199	0.7527	0.8328	-1.1697	-0.3091	-0.4559	-1.296	4.148	0.4095	0.0292	3.5258	-0.5364	1.1858	-0.1886	1.1505	0.7911	1.1928	2.3	0.3019	0.352	1.3891	-1.3019	-0.6438	2.1161	2.2535	0.823	-1.5591	-0.5176	-1.5453	0.1729	-0.0645	0.2197	1.5762	2.6771	0.275	-0.6524
P10145	CXCL8	Inflammation	-1.3401	-0.4755	-0.5507	-1.08	-0.5064	-0.8088	-0.6577	0.2062	0.0141	0.8465	0.2288	-0.2275	0.7076	0.9759	-1.3394	-0.2292	-0.3541	-1.1891	4.0682	0.2652	0.0327	3.5667	-0.3832	1.3491	-0.1235	1.1298	1.0203	1.3114	2.5182	0.2631	-0.0221	1.1995	-0.9733	-0.6486	2.0518	2.3468	0.8539	-1.6162	-0.3808	-1.447	0.1356	-0.2793	0.3401	1.6865	2.7161	0.2935	-0.605
P10145	CXCL8	Neurology	-1.4379	-0.4475	-0.7449	-1.0768	-0.4694	-1.0087	-0.8688	0.005	0.0191	0.872	0.1304	-0.1837	0.6793	0.8951	-1.331	-0.2869	-0.3466	-1.2287	4.1541	0.2949	-0.1127	3.6384	-0.5453	1.3612	-0.3244	1.0528	1.0575	1.251	2.3636	0.2652	0.0149	1.5161	-1.0158	-0.862	2.1834	2.3286	0.9409	-1.5558	-0.4874	-1.769	0.0874	-0.005	0.2209	1.812	2.6021	0.1816	-0.4963
P10145	CXCL8	Oncology	-1.4231	-0.3012	-0.4883	-1.0178	-0.4428	-0.8473	-0.5895	0.2153	-0.0308	0.6139	0.2288	-0.102	0.7076	1.033	-1.3169	-0.3313	-0.2916	-1.2883	4.1916	0.3731	-0.0106	3.7851	-0.5962	1.3589	-0.3575	1.2423	0.9469	1.3996	2.4405	0.2151	0.0864	1.4144	-1.0522	-0.7393	2.0469	2.3756	0.9449	-1.7198	-0.3883	-1.6878	0.1138	-0.219	0.1927	1.8082	2.7862	0.2546	-0.6712
P10147	CCL3	Inflammation	0.0121	-0.0119	-0.1693	-0.2266	-0.1437	-0.1279	-0.7461	0.3146	0.1703	-0.6555	-0.4279	-0.2795	0.0714	-0.1119	-0.1891	0.1217	-0.4821	-0.7923	1.4289	-0.3821	0.4896	0.618	-0.245	-0.3173	0.9932	1.1701	0.49	0.4785	0.5023	0.7452	0.6578	2.26	0.1749	0.8341	1.0055	1.5205	0.7174	-0.493	-0.7008	-1.1273	-0.2733	-0.119	-0.0736	0.4569	1.3475	0.3927	-0.4563
P10301	RRAS	Neurology_II	2.3986	-0.3017	-0.4508	0.5952	-0.5282	1.6029	0.005	-0.8515	1.3583	2.1782	-4.7296	-0.3762	-1.1515	0.9383	0.1979	-3.2425	-1.0191	-0.2259	0.8856	-0.1086	0.0237	-0.4543	-0.3148	-0.6555	-0.7737	0.9828	-0.0866	-0.7538	0.8787	-0.7309	0.5683	-1.3728	0.2136	-2.0365	-0.3188	-0.1507	0.1886	4.4979	0.5752	-0.1121	-0.2664	-2.1208	0.0225	2.9149	0.7456	-0.8683	0.1292
P10398	ARAF	Oncology_II	0.0895	-0.4461	2.5256	-0.5549	-0.0301	-0.5092	-0.9517	-0.8835	0.1915	-1.0542	-0.8147	-0.8139	-0.312	-0.4242	-0.078	-0.9038	0.292	0.2051	0.2536	-0.0997	1.528	-0.2764	0.1439	-0.0908	-0.0492	0.3663	-0.7534	0.4686	0.5007	0.3487	0.3687	-0.6127	2.2458	-0.607	0.4679	-0.2116	-0.3924	0.0717	-0.1583	0.2276	-0.0957	0.4145	-0.2935	1.2352	-0.0611	0.332	0.6414
P10415	BCL2	Oncology_II	-0.6227	0.0799	0.1124	0.0957	0.3489	0.0889	-0.2111	-0.5863	0.3076	0.9024	-0.0462	0.0174	-0.3181	-0.1088	-0.4728	-0.4209	-0.1967	-0.5644	1.5805	-0.4197	-1.0156	0.6675	-0.6135	-0.8256	-0.3981	0.858	0.4846	-0.2512	0.7533	1.4569	0.6267	4.2122	-0.2974	0.3527	-0.1458	5.0421	0.8729	-0.2801	-0.3534	-0.1879	-0.1294	-1.0393	-0.0193	-0.114	0.3194	-0.0145	-0.477
P10451	SPP1	Cardiometabolic	-1.1868	0.3263	-0.0371	-0.134	0.3668	0.4258	-0.525	0.4142	0.0957	0.1622	0.0279	-0.0043	1.2724	0.6377	0.0379	-0.1637	-0.3847	-0.686	2.6222	0.0043	-1.924	2.1107	0.5856	0.1972	-0.1899	1.8838	1.99	1.186	0.7869	1.6813	0.2419	-0.0123	-0.5786	-0.4948	-0.0899	2.1864	0.8828	-0.6773	0.1637	-0.6151	-0.2459	0.1963	-0.2541	0.8688	2.1607	-0.0208	-0.0957
P10523	SAG	Neurology_II	-0.5193	-1.0671	0.3915	0.3433	0.4959	-1.4443	-1.2147	1.4566	1.5922	-1.2782	-0.4082	-1.1802	2.8178	-0.3459	0.9624	0.6039	0.7621	2.5568	-0.3152	1.1428	0.4066	3.0257	-0.1721	-0.0678	-1.3885	-0.7487	2.4476	-1.2728	1.3869	-0.8928	1.9823	-5.4107	0.8993	0.0254	3.2753	-0.971	0.0224	0.1873	-0.8533	0.7192	0.0267	0.6425	0.8769	-0.3204	0.5428	-0.0224	-0.9901
P10586	PTPRF	Cardiometabolic	-0.4932	-0.0519	0.1725	-0.0299	0.7462	0.2585	-0.8377	-0.2003	-0.3079	0.1188	0.7899	-0.0364	0.6721	0.1637	0.1315	0.0554	-0.0607	0.2022	0.0061	-0.4411	-0.71	-0.4595	0.2723	-0.1815	0.4234	-0.4269	0.0565	-0.6404	0.6667	1.1436	0.1827	0.2266	-0.336	-0.0061	0.1582	2.065	-0.0099	-0.0299	-0.9321	-0.372	0.1171	-0.162	-0.0604	0.7191	1.1991	0.0492	0.2274
P10599	TXN	Inflammation_II	1.0775	0.0067	-0.097	-0.0225	-0.1506	0.0613	-0.1596	-0.0232	0.0238	-0.061	-0.062	-0.0167	0.037	-0.0595	0.0125	0.2065	-0.1356	0.0316	0.1501	-0.0679	0.028	-0.0935	-0.0732	1.1157	-0.0394	0.0073	-0.0765	0.0306	0.0022	1.1896	1.2232	-0.032	-0.1297	-0.1085	0.2014	0.1387	1.2025	-0.027	-0.0335	-0.1563	0.2315	-0.0845	0.0378	-0.0534	-0.0514	-0.0632	-0.0941
P10606	COX5B	Oncology	2.4835	-0.2416	-0.2065	-0.5505	-0.1163	1.2534	-0.7978	0.2434	-0.412	0.1448	-0.2669	-0.1224	-0.2475	-0.421	-0.8089	-0.6978	-0.3682	1.6365	1.8575	-0.567	-0.616	1.4732	0.1965	-0.1869	0.6793	0.014	0.3346	0.5415	0.8165	0.4534	0.0878	0.2106	-0.2129	-0.4223	0.2258	3.8207	1.0339	1.4209	0.0772	-0.1955	1.0704	-0.2804	-0.2207	-0.0334	0.5779	-0.4191	-0.3004
P10636	MAPT	Neurology	-5.4459	0.6958	-1.3101	-0.8037	-1.7878	0.5908	1.4677	1.186	0.5731	0.6739	0.7378	0.5426	0.0996	-5.3707	0.4742	0.1044	0.4845	-0.5197	0.6635	-0.4004	-0.3118	2.1973	0.4462	-1.1889	0.3939	-0.1807	0.9216	0.0536	1.1496	1.034	1.1788	-1.5464	0.1132	-0.3849	0.527	7.7937	0.4562	-5.3002	-5.669	-1.488	-0.9291	-1.2044	-1.0645	-0.6667	0.0866	0.3964	-1.3475
P10643	C7	Inflammation_II	-0.6538	-0.1799	0.165	-0.0727	0.5042	-0.1598	-0.2245	0.2795	0.4214	0.1208	0.0648	0.4813	0.0084	0.2227	-0.3776	-0.0522	-0.4266	-0.3317	-0.7782	0.0229	-0.1329	0.1837	0.3207	0.2329	1.0153	0.2269	0.2333	-0.3559	0.4561	0.2864	0.1205	0.1623	-0.4348	-1.3908	0.0355	0.5325	0.2287	-0.2422	0.4856	-0.2882	-0.0084	-0.0871	-0.2514	-0.2141	0.9322	-0.7652	-0.8993
P10644	PRKAR1A	Cardiometabolic	0.6885	1.4213	0.6258	0.5681	0.6421	0.1739	-1.1719	1.9395	-0.4346	-1.0543	-0.5782	-0.0686	0.5205	-0.828	-0.2947	-0.0482	-0.7971	-1.2565	1.3469	-0.587	-1.9797	0.1598	-0.7084	-0.7747	0.3043	0.6226	0.5337	-0.1508	0.9973	1.8207	-0.0166	-1.296	-1.4442	0.1556	2.2071	0.5808	-0.0723	3.7996	-1.5589	1.179	-0.5701	0.0863	-1.1196	-1.1491	1.2917	-0.274	-1.2671
P10645	CHGA	Cardiometabolic_II	-1.7275	-1.2058	-0.1491	-0.693	-0.4164	2.3893	-1.6174	1.321	-1.8306	2.832	0.0445	0.6659	0.3846	2.9973	-0.6691	-0.1215	0.5338	-1.6999	0.4006	-2.8887	-2.5778	-0.0445	3.883	-1.3929	0.2193	2.5877	-1.4271	0.1958	-0.8893	4.4441	-0.439	1.7946	-0.7277	0.7971	0.5018	3.714	0.754	0.7294	1.3932	-0.9253	2.5801	1.1509	-1.187	-0.1331	0.4056	0.3455	0.6298
P10646	TFPI	Cardiometabolic	-0.4679	0.5036	-0.3866	0.555	0.2109	-0.0429	-0.0971	0.4387	0.3206	0.0953	0.066	0.8259	0.3677	-0.1295	0.036	-0.8064	-0.2345	-0.4696	-0.1291	0.4569	-0.5316	0.2199	1.7769	-0.2271	0.2065	-0.6272	0.3713	0.5285	0.5475	0.1487	0.1025	-0.2533	-0.9095	-0.3377	0.652	0.6142	0.1145	-0.2685	-0.1431	-1.117	0.1577	-0.3931	0.0963	-0.1247	1.1163	-0.036	0.0888
P10721	KIT	Cardiometabolic	0.1851	0.7154	0.2227	0.4665	0.6052	0.1757	0.0613	-0.7869	-0.1902	0.0413	-0.015	0.5134	-0.1827	0.2834	-0.2527	0.4886	0.445	0.0483	-0.6359	-0.2416	0.0652	-0.9243	-0.1786	-0.5308	0.1423	0.1478	-0.1261	-1.2839	0.3387	0.095	-0.3738	0.4178	-0.0245	-0.0544	-0.707	0.2049	-0.2623	-0.181	-0.3403	-0.3463	-0.4321	-0.7751	-0.0637	-0.4676	-0.5848	0.1266	-0.0003
P10746	UROS	Neurology_II	0.0251	-0.3664	-0.0591	1.6028	0.8992	0.9377	0.0711	0.396	-0.0239	-0.061	-0.373	-0.4561	-0.8635	-0.022	0.5043	-1.8171	-1.3266	0.2136	3.0132	1.1182	-0.8156	0.315	0.0076	-0.5933	-0.6637	0.3152	-0.4505	0.6265	1.5986	1.3529	0.0387	-1.3165	-1.1012	0.3533	-0.5799	1.1506	1.8682	0.1788	-1.3429	-0.8083	1.0943	0.2406	1.1983	-0.0119	0.0774	-0.0076	-0.7286
P10747	CD28	Oncology	-1.0315	-0.1506	-0.0058	0.5385	0.1094	0.7313	-0.0102	-0.9572	-0.6072	-0.4253	-0.1595	0.0505	0.084	0.4435	-0.2874	0.0871	-0.1696	-0.3388	0.299	-0.899	-0.0396	0.0775	-0.8478	-0.9111	0.5603	0.1683	-0.5038	0.1754	0.6818	0.4439	0.5405	0.6139	1.096	0.2213	-0.2355	-0.0809	0.2457	-0.1676	-0.0261	-0.4135	-0.5339	-0.4192	0.5676	-0.5812	-0.0971	0.1731	0.06
P10767	FGF6	Inflammation_II	0.1053	0.4372	-0.2283	0.3392	-0.3401	0.1999	-0.9723	0.8244	-0.6122	0.5762	0.0255	0.5475	0.222	-0.2738	0.3844	0.0763	0.1996	-0.4866	-0.7634	-0.2862	0.6247	0.0341	0.2542	-0.6709	0.0988	-0.199	-0.2948	0.9293	0.3845	-0.0913	0.4308	-0.1701	0.0657	0.5637	-0.0248	0.288	0.1792	-0.1381	-0.0671	-0.3771	-0.4051	-0.0405	-0.0107	-0.3701	0.2527	0.0295	0.1492
P10909	CLU	Inflammation_II	-0.269	0.2355	-0.0533	-0.0362	0.0902	-0.2024	-0.2909	0.1727	0.2106	0.2739	-0.16	0.1147	-0.0759	-0.346	-0.3473	0.0236	-0.1002	0.0032	-0.7	0.0904	0.2416	-0.3962	-0.7244	-0.2542	0.3448	-0.0984	-0.0461	0.2835	0.4189	0.1007	0.1666	-0.2131	-0.0533	-0.4075	0.4473	0.3578	0.0324	-0.0994	0.3656	-0.352	0.3331	0.0296	-0.3345	-0.0949	-0.1216	-0.1993	0.0015
P10912	GHR	Inflammation_II	-0.5226	0.6371	-0.0474	0.219	0.3394	-0.2328	0.0475	-0.0924	0.3965	-0.0806	0.1885	-0.5307	-1.4422	-0.3746	0.4016	-0.8358	-0.0016	0.3354	-1.1898	0.3523	0.6232	-0.6962	0.8219	-0.1835	0.5349	-0.0846	0.1921	-0.9253	-0.1893	-0.692	0.4288	-1.7787	0.4687	-0.6941	0.0299	-0.1061	0.1861	0.2863	-0.0981	-0.6893	-0.5978	-0.1262	0.0016	-0.2136	-0.6404	-0.7248	0.5571
P11137	MAP2	Neurology_II	-0.0466	-0.0318	0.0927	0.1529	-0.0038	0.0535	-0.1191	-0.0333	-0.1772	-0.0305	-0.0528	0.0272	-0.2422	0.0001	-0.2347	-0.0355	-0.0553	-0.0563	0.3243	-0.0001	0.1148	-0.0543	0.0402	-0.0079	-0.0365	0.0465	0.0111	-0.2945	-0.2062	0.2041	-0.1843	-0.0147	-0.1332	0.1184	0.0812	3.8249	-0.0234	0.1406	-0.0089	0.2943	-0.1368	-0.0625	0.1624	-0.078	0.0443	0.0441	-0.1786
P11215	ITGAM	Neurology	0.0521	0.231	0.0106	0.5593	0.6604	-0.3168	-0.2472	-0.4024	0.0091	-0.2487	0.2355	0.0435	-0.6622	0.1315	0.2589	-0.0619	-0.4197	-0.417	-0.3788	0.4489	0.6128	-0.3852	-0.4054	-1.1819	0.6901	-0.69	-0.4345	-0.3436	0.5389	-0.0091	0.2558	0.1958	0.8277	-0.0563	0.0512	-0.5663	0.6215	-0.0664	0.5141	-0.4165	-0.5875	-1.1391	-0.0634	-0.341	-0.1894	-0.5652	-0.3332
P11226	MBL2	Inflammation_II	0.3041	-1.6488	0.3425	-0.7774	-1.5908	1.345	-0.4616	3.0904	0.7823	-1.1207	0.8041	0.0436	-0.6321	-1.0056	-1.4985	1.4789	0.4124	-0.7973	-2.99	1.5459	-0.4275	-2.103	-0.6831	0.2474	1.4193	-1.2392	1.7826	-1.4974	1.0879	0.6496	-0.8823	-0.0086	-0.0966	0.6422	0.7046	0.5495	-0.3786	-1.7789	1.5008	-1.4587	1.4305	-0.1491	0.3978	1.6972	-0.0558	0.3137	-2.1897
P11229	CHRM1	Neurology_II	-0.432	-0.3473	-0.5753	0.0671	-0.0767	0.5761	-0.5091	-0.5928	-0.4017	0.0191	0.5984	0.4076	-0.4512	-0.937	1.0272	0.2432	0.5077	-0.4225	1.1595	1.0598	1.145	0.1657	-5.6377	0.5293	-0.1918	-0.5328	0.0546	-0.6221	-0.2398	0.5021	-0.0385	-2.2893	-0.2796	-0.366	0.6882	0.6475	1.6743	0.4255	-0.1574	0.0299	-0.4292	-0.1095	0.2453	1.4299	-0.6272	-0.3738	-0.8291
P11234	RALB	Inflammation_II	0.4559	-0.3582	-0.127	-0.0418	-0.0187	-0.1065	-1.2049	-0.8725	-2.0345	-0.7581	0.0233	0.0742	0.6488	-0.9995	-0.7024	-0.096	-2.1854	-0.1874	1.4863	-1.0994	-0.1016	0.412	0.3571	-1.4458	0.9654	0.5822	0.0527	0.8019	0.8523	0.1548	-0.0984	-0.0218	-0.1289	-0.0175	0.3635	2.1417	0.5485	0.3711	-2.1082	0.8603	-0.1604	0.3999	-2.3661	0.0175	2.2107	0.0299	-0.1805
P11274	BCR	Inflammation	0.5376	-0.0566	-0.3028	0.1982	-0.2346	-0.0681	-0.5549	0.5299	-0.0737	-0.6483	-0.3315	-0.0496	0.6329	-0.249	0.1909	-0.6418	-0.9877	-0.6909	0.6283	-0.4597	-1.2381	1.1105	-0.1542	0.3405	0.045	0.6683	0.0688	0.662	0.7033	1.0173	0.9466	-0.1369	-0.0904	0.3226	1.903	0.7321	-0.1842	2.6612	0.2378	-0.4074	0.6358	-0.7313	-0.2528	-0.1624	0.9037	1.7632	-0.31
P11279	LAMP1	Cardiometabolic_II	1.61	0.4225	0.0464	0.0006	0.4369	-0.0073	0.1604	-0.2316	0.0468	-0.3712	-0.2996	0.3039	-0.23	-0.1747	0.0915	0.2742	-0.536	-0.4429	-0.1536	0.1811	0.2543	-0.4578	-0.3652	0.5372	-0.242	-0.309	0.2255	0.1517	0.3151	4.4485	0.4865	-0.2031	0.0377	0.1662	0.0247	0.4152	0.5959	-0.1055	0.0527	-0.1865	-0.3465	-0.198	-0.0687	0.1005	-0.2703	-0.3002	-0.4003
P11310	ACADM	Oncology_II	0.2231	0.6349	-0.6237	-0.1668	0.3885	-0.3785	-1.5045	0.004	-0.0231	0.5697	-0.5159	-1.0631	1.1257	-0.5711	0.3333	-1.2717	2.1915	-0.7451	0.1084	-0.0951	0.1486	-0.5785	0.0031	-1.3708	-0.0954	1.2422	2.0034	1.0923	-0.5389	-1.0395	-0.0807	0.5163	-0.0031	-2.1436	-0.3566	0.0836	-0.9092	-0.3737	-0.9392	0.2601	-0.7359	-1.8716	0.643	0.2092	-0.45	5.5641	-0.4704
P11387	TOP1	Oncology_II	-0.9491	0.2219	1.8453	0.4802	-0.1994	0.8181	-0.3227	0.4937	0.4738	-3.4274	0.6689	0.9222	-3.3039	0.6617	1.0234	-3.3367	0.8087	-1.246	-3.2938	0.6905	-1.8171	-0.9446	0.34	0.0598	-3.1693	-0.2078	0.8181	-0.2746	-3.2854	-0.0598	-0.8697	0.3367	1.7142	-0.2043	-1.6728	-0.4438	2.1861	-3.5171	-0.0836	0.9985	-1.7901	0.7621	0.4437	1.2295	1.843	2.4331	0.3799
P11532	DMD	Cardiometabolic_II	-0.5107	0.3563	0.4244	-0.458	-0.0077	0.2602	-0.3899	-0.1948	-0.1921	-0.3292	-0.1641	-0.2179	-0.0315	-0.1197	-0.7529	0.1892	-0.366	-0.5698	1.3338	-0.4161	0.1161	1.1702	0.3592	-0.9701	0.5526	1.2719	-0.0033	-0.1335	1.0948	2.6076	-0.0398	0.6251	0.0179	-0.2287	0.1531	0.6951	0.62	1.0949	-0.2349	-0.3382	-0.197	-0.573	-0.319	-0.265	0.7856	-0.2504	-0.6542
P11684	SCGB1A1	Inflammation	-0.1216	0.5547	1.1229	-0.4883	0.2798	0.9121	-0.1768	-0.0805	-0.6603	0.4895	-0.2721	-0.6327	0.0495	-1.2121	-0.577	0.0904	0.044	-1.5349	0.4235	-1.3156	0.5902	1.0296	-0.4093	-0.146	0.2487	1.1594	0.7815	1.4179	1.5301	1.9115	-0.5125	-2.0068	0.1413	0.1249	-0.2486	1.1093	-0.0461	0.1913	-0.8125	-0.3532	-0.044	-0.0495	-0.5094	-0.1987	0.3052	-0.4397	-2.266
P11717	IGF2R	Neurology	-0.0765	0.4144	-0.1771	0.009	-0.1096	-0.2939	0.1318	0.3912	0.1653	-0.0152	0.2141	0.0412	-0.0514	-0.1135	0.2259	-0.245	-0.0338	-0.5793	0.1605	0.2016	0.3327	0.0658	-0.1244	-0.7386	-0.0467	0.3608	0.346	0.311	0.7098	0.2618	0.0419	0.4897	-0.4202	-0.7697	0.7365	1.0614	0.3412	-0.5064	0.4889	-0.5183	-0.4769	-0.1325	0.0076	0.209	0.9191	0.0913	-0.0849
P12004	PCNA	Oncology_II	0.1813	-0.0064	0.2016	-0.7048	0.2636	-1.2454	-0.0633	1.9679	0.2404	0.5397	-0.1942	-0.066	-0.4661	-0.9552	0.279	0.2381	0.0064	-0.165	1.4946	0.4041	-0.0986	0.0525	-0.0581	-0.357	-0.1545	0.3486	0.5877	2.8475	-0.2921	0.5338	0.1216	0.1529	-0.6311	-0.7316	3.4263	0.8341	-0.0664	1.7695	0.5176	-0.7585	-0.135	-0.2007	0.1428	-0.1665	0.2709	-0.3159	-0.4883
P12034	FGF5	Inflammation	-0.1347	-0.2115	0.5209	-0.2944	0.0574	0.2449	0.247	-0.1071	-0.0994	0.2795	0.2673	1.0093	0.2273	-0.2782	-0.3393	-0.0919	0.1156	-0.9613	-0.3842	-0.0502	-0.8055	-0.4575	0.0462	-0.6954	0.4902	0.9293	0.6002	-0.2488	0.366	1.516	-0.0351	1.1436	0.011	0.0809	-0.2385	-0.008	-0.3644	-1.0412	-0.0752	-0.4028	-0.7748	-0.4783	-0.1538	-0.9595	0.4519	0.7808	-0.9033
P12081	HARS1	Neurology	1.2427	0.4125	-0.4903	0.7214	0.3917	0.7683	-0.7244	0.4153	0.3188	-0.4867	-0.8247	0.1239	-0.4492	-0.6355	-0.0734	-0.1498	-0.0678	-0.3751	1.591	-0.4625	-0.487	-0.1423	-0.5152	-0.3978	-0.0234	0.0126	-0.0126	-0.5758	0.7593	-0.1769	0.5622	-0.3426	0.123	0.2139	0.8471	1.9946	0.3917	2.3217	-0.7817	0.1508	0.5583	-0.3488	0.3181	-0.6458	0.7871	-0.0527	-0.24
P12104	FABP2	Cardiometabolic	-0.3203	1.4753	-0.2598	0.7063	-0.1402	1.692	0.0635	-1.1344	-0.272	1.2872	1.0645	1.8884	-0.587	-0.5498	-0.1419	1.9011	-0.3677	-0.4909	-0.942	0.3656	-0.3579	0.8487	-1.4223	-1.15	1.3991	0.648	1.4493	-0.4395	0.1228	1.8156	-0.2202	2.32	-0.0766	-0.2116	0.5774	-0.7859	1.065	-1.5838	-0.344	-0.8178	0.8582	-1.2737	0.122	-1.4296	1.5505	-0.1549	-0.5611
P12111	COL6A3	Cardiometabolic	-0.6929	0.5314	0.6611	0.0034	-0.1424	-0.1816	-0.4316	0.3355	-0.6936	0.4066	-0.2785	0.2716	0.378	0.4521	0.0477	0.2829	-0.3022	-1.4106	0.6118	-0.1899	-0.5766	1.6125	0.0071	-0.7793	0.5067	1.9031	0.418	0.7523	1.1264	2.5315	0.0765	-0.2883	-0.5978	-0.0426	0.3683	0.9957	0.4698	-0.4986	-0.2133	-0.7655	-0.5201	-0.0762	-0.1112	-0.2894	1.5823	0.3099	0.0586
P12270	TPR	Cardiometabolic_II	0.0614	-0.7049	-1.1067	-0.1615	-0.1038	0.4436	-0.1914	0.4847	-0.1193	-0.5688	0.0814	-0.0866	-0.3212	-0.2899	-0.0754	-1.2118	0.3719	-0.1788	1.9741	-0.7221	-0.0581	2.4079	0.0993	0.2685	0.5166	0.3427	0.7974	2.4737	1.3997	1.0784	1.44	-0.4472	-0.0176	-0.7207	-0.3173	6.6468	0.8475	-0.43	-0.3908	-0.6227	0.5135	1.1405	-0.041	1.0197	2.8872	-0.2316	0.7909
P12277	CKB	Cardiometabolic_II	-0.4332	-0.8385	0.8789	-0.9923	1.0572	-0.5601	-0.0369	0.6591	-1.3011	0.3116	0.2681	1.6974	1.144	0.7642	-0.78	-0.0934	-0.6359	-1.0619	0.905	-0.4127	-0.8592	1.3854	0.5229	-0.6432	0.2616	1.9064	-0.2016	1.5859	1.7786	1.6142	0.1182	1.5254	-1.2369	0.7591	-0.5989	2.5199	-0.7895	-0.3092	-0.7852	0.1067	0.4771	0.7126	0.1528	-0.239	1.8194	1.253	-0.6447
P12318	FCGR2A	Cardiometabolic	-0.3504	-0.3242	0.1129	-0.8063	0.098	-0.7219	0.2286	0.2325	-0.5613	-0.6051	-0.1081	-0.0428	0.4095	-3.1705	0.0111	-0.1118	-0.2494	-1.308	0.7489	0.3278	-0.905	1.2728	-0.4372	-0.0698	0.4112	0.5354	-0.0811	-0.4946	0.8503	0.2232	0.3405	0.6041	0.1309	-1.5554	0.0221	0.4852	0.1338	-0.599	0.3897	-0.271	-0.3015	-0.5527	-0.4081	-0.6238	-0.3942	0.206	-1.1625
P12319	FCER1A	Neurology_II	0.0011	0.1663	0.1636	0.3252	0.2224	-0.036	0.3063	-0.1649	-0.321	-0.2342	-0.2238	0.2713	-0.0568	0.0929	-0.5281	-0.1002	-0.1279	-0.5853	-0.0011	0.1382	-0.228	0.0117	-0.1741	-0.1125	-0.3424	0.1578	-1.3257	-0.2761	0.0454	0.3886	0.3264	-0.0125	0.018	0.2077	-0.2732	-0.4118	-0.3062	-0.1005	0.5561	-0.3033	-0.0361	0.0652	-0.1787	-0.5905	0.2653	0.1731	-0.284
P12429	ANXA3	Neurology	0.9152	-0.4853	-1.0806	0.8859	0.2928	0.1073	-1.3021	0.3761	0.1254	-1.005	0.2385	0.034	-0.2511	-0.5961	0.8675	-0.9691	-0.3776	-0.5973	0.5367	0.2056	-1.0101	-0.3154	-0.3505	-0.2341	-0.5775	0.0794	-0.2862	0.0093	0.1502	0.9148	3.0809	-0.3298	-0.8511	-0.6834	0.3044	0.0577	0.3534	1.9005	-1.4203	-0.3571	1.2321	-1.3823	0.3872	-0.0374	0.2087	-0.3586	-0.3382
P12532	CKMT1A_CKMT1B	Inflammation	-0.6063	2.0575	0.0099	-1.2934	-1.6692	-0.0039	-1.0719	-0.2382	0.2457	-1.3594	1.2076	1.0344	-1.146	0.1346	-0.1303	0.6545	0.6051	0.917	0.2574	0.0039	-0.3792	0.6913	0.1495	0.292	0.4799	-0.979	1.5311	0.8542	1.5031	-0.0788	-0.2416	2.0557	-0.7499	-1.4235	1.4336	3.6712	0.1301	-0.1006	-0.3514	0.1916	0.2163	-2.5887	-1.0916	0.8609	0.5511	1.067	0.423
P12544	GZMA	Inflammation	-0.8359	-0.2455	0.3117	0.1903	-0.1911	0.0243	0.0903	0.2347	0.1887	-0.0525	-0.242	-0.4941	0.1723	0.1646	-0.5235	0.0005	-0.3406	-0.5531	0.5206	0.0443	-0.5176	0.5588	-0.3462	-1.112	-0.1236	0.3729	0.0554	0.4842	0.8405	-0.007	0.1093	0.163	0.0534	0.3854	0.3469	-0.0005	0.618	-0.1639	0.1223	-0.4079	-0.0248	-0.4895	-0.4132	0.3303	-0.4726	-0.0591	-0.3548
P12644	BMP4	Neurology	0.0404	-0.0717	0.4946	0.207	0.4259	0.7706	-0.1196	-0.2878	-0.5067	0.016	-0.3868	-0.7648	-0.5191	0.7354	-0.873	-0.2884	-0.1226	-1.2941	-0.9906	-0.6466	1.364	1.6105	0.1928	-0.4817	-0.4374	0.7681	1.2562	-0.44	1.4197	-0.1429	0.3509	2.3605	0.4817	0.1763	-0.0658	-0.4714	0.5573	-0.7168	0.241	0.4588	0.7319	0.0975	-0.1265	-1.0173	-0.697	0.3111	-0.1874
P12724	RNASE3	Cardiometabolic	-0.5974	0.0347	-0.0584	1.3856	0.162	0.29	-1.6204	1.9541	0.2219	-0.8507	-0.6321	0.7351	0.2882	-0.1335	2.0739	-1.0797	-0.1399	-1.4661	0.8813	-1.0629	-1.9917	0.4259	-0.6496	-2.2413	-1.7591	0.861	0.5736	0.2471	1.5159	3.1408	2.7304	-1.2678	-2.1973	-0.7571	1.2515	2.5569	1.0143	-0.7032	-2.3783	-1.175	2.369	0.1759	-0.0447	-0.702	1.391	-0.3039	0.4216
P12821	ACE	Inflammation_II	-0.1127	0.1039	-0.0786	-0.2486	0.1399	0.5033	0.0868	-0.3927	-0.2895	-0.1107	0.4684	0.7739	0.0619	0.6554	-0.382	0.0258	0.1777	-0.8147	-0.5701	-0.5794	0.2338	-0.3716	-0.7781	-0.6408	0.6527	-0.6338	0.154	-0.2433	0.4326	1.0151	-0.0293	-0.3859	0.3747	0.7962	0.3656	0.2343	0.1883	-0.4356	-0.1317	-0.0987	-0.014	-0.637	-0.3812	-0.236	-0.3424	-0.1092	0.4517
P12829	MYL4	Cardiometabolic_II	0.1431	-0.4095	0.1981	0.0697	-0.5641	1.4575	-0.9835	0.4781	0.5715	0.0321	-0.2025	-0.344	-0.5548	-0.2166	0.65	0.6258	0.3619	-0.1592	4.2294	0.0119	-0.2963	0.2931	0.5173	-0.3866	0.1231	1.5894	-0.2479	0.0738	0.4482	1.4565	0.4386	1.1772	-0.6603	-0.0818	-0.8073	0.6935	1.3154	-0.9611	-0.7397	-1.4396	0.8377	0.9029	0.6795	0.169	0.1653	0.2296	-0.2406
P12830	CDH1	Cardiometabolic	-1.0798	0.8093	0.3739	0.7843	0.7538	0.0132	-0.1144	0.1507	-0.382	0.0717	-0.2815	1.5695	0.064	0.0383	-0.2401	0.3559	0.0667	-1.2779	-0.6609	-0.4008	-0.8092	0.4125	1.1292	-0.5554	1.0554	0.1512	-0.1426	-0.1312	0.5578	1.7617	-0.2636	1.352	-0.0595	0.0552	-0.0065	2.4697	0.5204	-0.6354	0.0601	-0.4927	-0.0575	-0.125	-0.1522	-0.6184	0.4833	0.6175	-0.3948
P12872	MLN	Inflammation	-0.0757	-0.035	1.1649	-1.3427	-0.1431	-0.0757	0.4089	-0.6013	0.4858	-1.4616	0.7845	0.9751	1.8888	0.7558	0.0573	0.5963	-1.0393	-1.4294	1.8274	-0.6301	-2.3787	1.386	1.2345	-0.4317	1.4344	1.5356	0.8504	2.2279	-1.1915	1.6614	-0.7951	2.3897	0.4507	1.353	0.2003	0.2346	1.6102	-1.298	0.0612	-2.3444	1.7177	-0.0822	-0.7009	-0.7109	1.7756	1.9404	-0.7358
P12931	SRC	Oncology	2.4468	2.199	-0.8512	1.6992	1.4969	2.0259	-0.6179	0.553	-0.4222	-0.0041	-0.349	1.2267	0.5215	-0.5608	-0.307	-1.2265	-0.9417	-0.4956	-0.1976	-0.7959	-0.4379	0.2816	-0.4201	-0.1082	-0.0041	-0.317	0.6021	-0.0428	1.7991	-0.3069	0.0805	-0.3422	0.5806	0.3097	2.3209	1.5395	0.5384	4.4328	-0.7548	1.1077	0.3815	-0.7187	-0.1106	-0.4864	1.9336	-0.2797	-0.2672
P12955	PEPD	Inflammation_II	-0.108	0.5714	0.1323	0.4246	0.5174	0.1286	-0.232	-0.5406	-0.0991	0.3604	0.3513	0.5538	-0.41	0.0011	-0.4352	-0.177	0.0354	0.2337	0.2032	0.07	0.3138	-0.5613	-0.5438	-0.4477	0.3169	-0.3678	-0.073	0.2148	0.3439	0.3682	0.0688	0.1167	-0.2589	-0.2686	-0.9058	1.8702	0.5673	-0.1619	-0.4022	-0.2908	-0.495	-0.3558	0.0694	-0.3916	-0.4592	-0.0825	0.306
P13051	UNG	Oncology_II	0.8419	0.306	-0.2404	-0.1034	-0.7527	-0.0045	-0.1937	0.1407	0.1932	-0.2263	-1.0814	0.4192	-0.3402	-0.8486	-0.2678	-0.4068	0.2002	-0.0668	0.5276	0.4684	0.1227	0.3826	0.2294	-0.104	0.4961	0.1745	-0.4471	0.6822	-0.1359	0.4311	0.2252	0.6056	0.0552	0.2296	-0.8822	3.2281	-1.0038	-0.1356	0.3272	-0.2422	-0.0511	-0.792	-0.666	-0.4185	0.4299	-0.5841	0.5072
P13224	GP1BB	Cardiometabolic_II	1.3175	0.2819	-0.9751	1.3989	0.8328	0.6736	0.968	0.3197	-0.8185	-0.4639	-0.631	0.3716	0.1255	-0.033	-0.4465	-0.912	-0.9149	0.0708	-0.8489	-0.4353	-0.7417	-0.4481	-0.5565	-0.7794	0.2545	0.3455	-0.255	0.1408	0.3059	-0.5656	0.4496	-1.1988	-0.7833	0.0421	0.4125	0.2683	-0.5534	2.8214	-0.8708	-0.3319	0.1456	-2.1685	-0.8127	-0.6223	1.316	-1.1515	-0.484
P13232	IL7	Inflammation	0.644	0.8378	-0.6095	-0.0139	0.4126	-0.3508	-1.0257	0.5768	-0.6091	2.5004	-0.4357	0.7525	-1.1566	-1.1375	-0.0407	-1.4226	-0.022	-0.011	1.7529	-0.611	-0.0701	0.8743	-0.3117	0.6716	-0.282	-0.4681	0.3283	0.2193	0.011	-0.1559	-1.1519	-0.8591	0.3142	0.1885	2.1665	0.3148	-0.174	1.4493	-1.8374	1.0085	-0.2379	-0.2955	1.474	1.6274	1.5271	0.6109	-0.4069
P13236	CCL4	Inflammation	0.5541	0.2747	-0.0851	-0.5878	0.2046	-0.0963	-0.4965	0.0047	0.3425	-0.5085	-0.4696	-0.452	0.0811	-0.5643	-0.933	0.0897	-0.3747	-0.3544	1.2037	-0.374	1.8244	0.0973	-0.2746	-0.862	0.8262	0.4957	1.3858	-0.5965	0.2826	0.002	0.611	2.2986	0.3094	0.7068	1.2889	1.4016	0.7017	0.0612	-0.4485	-1.353	-0.1875	-0.536	-0.2824	0.4352	0.5174	0.3771	-0.338
P13284	IFI30	Oncology_II	-0.698	-0.4369	-0.1401	-0.3923	0.1005	0.5118	-0.7972	0.4381	0.3209	0.2198	-0.0274	0.2312	0.2766	0.4439	-0.557	0.5619	-0.504	-0.7012	1.3124	-0.2012	0.5322	0.9754	0.2775	-0.6166	0.3179	0.5674	0.3299	0.2292	0.8176	0.8553	0.146	1.3315	0.0118	-0.2284	-0.0118	2.2352	0.8738	-0.6313	0.0177	-0.8072	-0.1896	-0.431	-0.2891	0.0915	2.4252	-0.1642	-0.4391
P13385	TDGF1	Neurology	-0.4686	-0.6123	-1.2913	0.2208	4.8456	3.6974	-0.7879	-1.7814	0.2068	-1.5386	0.4565	-2.4443	-1.2384	-1.0914	0.5501	4.5314	2.9075	5.3733	5.8389	3.5525	-0.8904	5.4813	6.2261	2.9927	0.7339	7.7781	-3.8145	-1.2998	5.456	1.345	-1.9378	0.9085	-1.7273	-0.2991	-0.882	6.1065	4.7653	-0.6301	-1.7941	-0.0054	3.1892	5.2378	4.2438	-0.0785	6.1976	3.7934	-0.278
P13473	LAMP2	Neurology	-0.1643	0.5189	-0.0047	-0.0074	0.3406	-0.1147	0.5562	-0.0805	0.2491	0.2948	0.0837	-0.1327	-0.7029	-0.3156	-0.3244	0.1416	0.0547	0.0305	-0.009	0.9098	0.4184	-0.5726	-0.1013	-0.5874	-0.0941	-0.2176	-0.002	0.1574	0.3142	-0.1891	-0.026	0.2509	0.1246	-0.378	0.3504	0.0576	0.2593	-0.1508	0.3599	-0.5557	0.121	-0.2732	0.561	0.3348	-0.1828	-0.2496	0.3374
P13500	CCL2	Neurology	-0.7272	-0.4178	0.0747	-0.05	0.2785	-0.5474	-0.7375	0.0833	-0.3749	0.0261	-0.4788	0.1277	0.0494	0.09	-0.4257	-0.2707	0.0244	-1.2185	0.9895	-0.4848	-0.0324	0.2799	-0.3278	-0.015	-0.4386	0.1827	-0.1283	0.2917	0.7476	0.6266	0.3386	0.5883	-0.6312	-0.3889	0.5186	0.7963	0.6657	-1.1009	-0.4976	-0.8577	1.188	0.0304	0.5401	0.7402	0.3102	-0.2135	0.475
P13501	CCL5	Cardiometabolic	2.5903	3.024	-1.0767	-0.0183	0.4467	-0.1193	-2.3771	1.1387	0.082	-1.7456	-1.1239	2.1392	-2.2454	-1.3621	-0.129	-2.6196	-0.4513	-1.362	2.1572	-1.9266	1.5055	-0.1331	-0.3008	0.1924	-1.4632	-2.2469	0.2144	0.0183	0.2874	-0.833	-1.6068	-2.7004	0.3907	0.436	3.7765	-0.5322	-0.174	2.1058	-2.241	1.3422	0.9617	-4.7436	-0.706	-1.7339	1.3292	-1.2922	0.1519
P13521	SCG2	Oncology	-0.3813	0.4218	0.3989	-0.32	0.618	0.1548	0.8324	-0.5123	0.7442	-0.7262	-0.4659	1.0965	-0.4041	0.2549	-0.4244	0.2687	-0.4452	-1.3376	-0.1893	-0.1957	-0.7743	0.8624	0.8439	-0.6162	0.5885	1.7802	0.2507	0.1421	0.6264	1.3862	-0.3212	1.1141	-0.5438	0.0057	0.2824	2.1352	0.1353	0.0334	0.2778	-0.3893	-0.0993	-0.4168	-0.3351	-0.4487	0.025	-0.6776	-0.1339
P13591	NCAM1	Cardiometabolic	0.0219	0.318	0.4261	0.4338	0.5595	0.3305	0.173	-0.5421	-0.087	-0.3192	0.1787	-0.1013	-0.1472	-0.4606	-0.4647	-0.0999	0.1117	-0.5425	-0.0627	-0.4473	-0.6011	-0.3206	0.2638	-0.2363	0.2511	-0.0219	-0.1887	-0.2521	0.6078	0.2095	-0.3275	-0.033	0.3707	-0.5717	-0.2745	2.8266	0.1249	-0.2963	0.3865	0.2649	-0.0831	-0.6649	0.1044	-0.1588	-0.1459	0.5031	-0.2824
P13598	ICAM2	Cardiometabolic	-0.6527	0.2839	-0.0887	-0.6471	0.4535	-0.2513	-0.2937	0.5646	-0.3224	0.1483	-0.5829	0.5609	0.5295	0.3514	0.4026	-0.1723	-0.1054	-0.1297	0.5537	-0.0102	-0.2746	0.3955	-0.4488	-0.3153	0.2126	0.02	-0.2536	0.4319	0.3946	0.7914	0.1869	0.8793	0.0225	0.1194	-0.273	0.1825	-0.8193	-0.6092	-0.3833	-0.3933	-0.0815	-0.4157	0.3019	0.0571	0.5505	-0.3654	0.2
P13611	VCAN	Neurology	-0.4196	-0.1223	0.3161	-0.3519	0.8334	0.4694	-0.3869	0.6118	0.1957	0.0612	0.1284	-0.0556	-0.1642	0.1599	-0.706	-0.2466	-0.0982	-0.4014	1.264	0.4123	-0.1605	1.091	0.1585	-0.0612	0.3146	0.4451	0.6034	0.0485	0.494	0.7363	-0.1995	0.5181	-0.014	-0.3379	-0.3336	1.49	-0.2364	-0.6234	0.0797	-0.5686	0.0102	0.546	0.2747	-0.0085	0.8529	-0.3312	-0.6789
P13647	KRT5	Neurology	0.3319	0.3592	1.2434	-0.9626	0.0238	-0.3922	-0.3529	0.7569	-0.8726	-1.0495	-1.0217	0.6396	-0.5836	0.3321	-1.5267	-0.2173	0.5311	0.1948	1.277	-1.2836	-0.7545	1.0022	0.2765	-0.5274	0.8423	-0.0208	0.7219	1.6045	1.563	2.0763	-0.7988	-0.0307	1.2382	-0.2083	0.9353	0.3669	0.5174	-0.2678	-0.3922	-1.1482	-0.0441	0.4637	-0.471	1.4378	1.3353	0.0965	-0.7236
P13667	PDIA4	Cardiometabolic_II	0.6207	-0.5193	-0.3215	0.2051	-0.009	-0.0802	-0.1463	0.9826	-0.1999	-0.224	-0.2441	0.2051	0.3254	-0.1648	0.0367	-0.2407	-0.5954	-0.498	0.0986	-0.2238	-0.5819	-0.4342	-0.4509	-0.5381	0.0472	0.06	0.4754	0.3678	0.8359	0.6526	0.1935	-0.6675	-0.5883	-0.0956	0.8711	3.6489	-0.0226	2.1075	-0.0564	-0.6496	0.0529	-0.018	-0.2924	0.0802	1.5838	-0.4543	-0.1413
P13686	ACP5	Cardiometabolic	-0.8233	0.5207	-0.1041	0.4777	-0.342	-0.4856	-0.183	1.1178	0.6314	-0.162	-0.0595	0.4951	-0.3427	0.6553	0.0321	-0.4558	-0.0248	-0.4402	0.1392	0.061	-0.3235	-0.0017	0.198	-0.2806	0.719	0.0017	0.2001	0.5545	0.1117	0.5916	-0.6115	0.7112	-0.0125	0.2359	-0.1868	1.2576	0.3809	-0.2599	0.1189	-1.1876	0.2571	-0.0557	0.3275	0.1835	0.4555	-0.0685	0.0171
P13688	CEACAM1	Oncology	-0.2236	0.9319	-0.0669	-0.3614	0.231	-0.3215	0.0171	0.2954	0.039	0.805	0.0217	0.0955	-0.1846	0.166	-0.0678	0.0433	-1.0139	-0.1807	0.2194	0.8518	0.088	0.2553	0.2059	-0.3258	0.2203	-0.2257	0.0762	0.0116	0.1715	-0.0043	0.0717	0.7316	-0.0752	0.0126	-0.2687	0.5198	-0.1388	-0.0918	-0.1797	-0.3896	0.0349	-0.3563	0.0529	0.0864	0.0623	0.0052	-0.0048
P13693	TPT1	Inflammation	-1.7691	0.6073	-0.0423	0.1561	0.0267	-0.6696	-0.9425	-0.1493	0.2167	0.6826	0.2836	-0.5905	0.1245	0.2499	0.0424	2.3152	-0.1506	-0.5691	0.2087	-0.0761	0.4759	-0.3126	0.0195	-1.0328	0.0637	0.2585	0.1206	0.2104	0.3085	0.2528	2.097	-0.5942	0.2591	-0.4053	-0.1031	0.776	0.4272	-0.1633	0.0339	-0.521	-0.8338	-0.4533	0.0467	0.2101	0.6081	-0.4013	-0.0533
P13725	OSM	Inflammation	-0.823	-1.1545	-0.4734	0.9953	-0.5558	0.0065	-2.2236	1.0919	0.6747	-0.6645	1.5654	-0.2505	-0.948	0.122	1.6899	-1.2622	0.4128	0.2485	2.4269	1.355	-1.0398	1.0906	0.6626	0.6042	-0.9836	-0.6381	1.4046	0.4434	0.0578	0.5102	-0.0133	1.1089	-0.4055	-0.6172	-0.6513	0.4272	1.092	-0.6038	-1.2386	-2.1424	2.3789	-0.7653	0.6376	1.8572	0.0108	-1.1255	1.8168
P13726	F3	Oncology	-0.4194	0.4304	0.1896	0.1205	0.7716	0.3632	0.4391	-0.3233	-0.3848	-0.4443	0.0537	0.4714	0.0089	-0.1109	-0.5738	-0.1142	0.033	-0.8946	-0.0447	-0.3069	-0.8209	0.0043	0.2135	0.0757	0.8522	0.4475	-0.1352	-0.4633	0.5436	1.0882	-0.0043	0.3732	0.0472	0.4299	-0.369	-0.2128	0.0486	-0.4377	-0.497	-0.1394	-0.2426	-0.3814	-0.2856	-0.1929	0.0873	-0.1382	-0.786
P13727	PRG2	Cardiometabolic_II	-0.5638	-0.6817	0.0721	-0.2333	0.0119	0.3047	-0.4067	0.5668	-0.132	0.2683	0.7536	2.4293	1.103	0.4232	0.5756	-0.1932	-0.3951	-0.0759	-0.4235	-0.9066	-1.1369	0.4631	0.3501	-1.5752	0.1453	2.31	0.0797	0.5554	1.2111	1.4586	0.087	0.0942	-0.4999	0.7346	-0.1443	0.8006	-0.0011	-0.7354	-1.1106	-0.2259	-0.059	2.1779	-0.4557	0.9312	1.9399	0.2316	-0.5532
P13747	HLA-E	Inflammation	0.1163	-0.2493	0.0912	-0.2837	0.0024	-0.3013	-0.1581	0.2119	-0.5012	-0.4604	1.1899	-0.1356	-0.0142	0.0623	-0.0024	-0.1288	0.0823	0.1103	0.2229	-0.8047	0.0074	0.5105	-0.1833	-0.5174	0.0496	0.9709	0.0507	-0.0637	0.5038	1.0372	0.3944	-0.0774	0.2746	0.1982	0.1871	0.0894	0.1817	-0.1593	-0.2187	-0.3892	-0.2487	-0.3064	-0.2461	-0.2534	0.366	0.1755	-0.3354
P13796	LCP1	Cardiometabolic_II	-0.5088	0.1486	-0.4794	-0.1485	-0.1284	-0.4193	-0.9389	0.336	0.4991	-0.1573	0.0851	-0.0337	-0.3202	-0.2521	-0.0596	-0.7638	0.1546	-0.4897	0.7358	1.2432	0.0791	-1.0442	-0.7379	0.3074	1.0741	-0.1424	0.4719	-0.3076	0.5688	0.1358	-0.064	-0.4022	-0.1625	-0.4371	-0.541	0.5902	0.8521	1.0348	-0.3412	-0.2422	-0.0056	0.2357	0.4887	0.044	0.6979	-0.0514	-0.111
P13807	GYS1	Cardiometabolic	1.159	0.3829	-1.164	0.4778	0.163	0.8053	-0.9187	0.9695	-0.0709	-0.5625	-0.2659	0.664	0.2966	-0.6973	0.2924	-0.9436	-1.1502	-0.7465	1.3978	-1.2393	-1.8005	-0.2834	0.0237	0.2456	-0.8693	-0.4235	0.3011	0.3538	0.7381	0.5902	-0.7183	-0.9156	-0.7862	0.2054	3.4524	1.4826	-0.1369	5.105	-0.658	0.7092	2.2153	-1.4274	-0.5593	-0.8455	1.331	-1.0322	-0.6947
P13861	PRKAR2A	Neurology_II	0.1688	0.1686	-0.3195	0.1064	0.1116	0.7699	-1.5665	-0.2149	0.215	-0.2318	-0.6865	-0.2102	-0.5646	-0.9119	0.1636	-0.5761	-0.3623	-0.605	1.8187	-0.3058	-0.8316	0.0186	-0.4857	0.552	0.205	0.2512	-0.3452	-0.1608	0.5085	1.0423	0.7614	-0.1331	-0.7457	-0.3828	0.4392	2.3946	0.4123	1.7315	-0.8291	-0.7454	1.2726	-1.0096	0.2	-0.5621	0.6692	-0.4113	-0.6016
P13929	ENO3	Cardiometabolic_II	-0.5877	1.3422	0.3757	0.264	0.607	0.3847	-0.2047	-1.8579	0.179	-0.7802	-1.0125	-1.976	-1.6828	-1.749	0.2253	0.8534	-0.1071	0.415	-1.829	0.3564	1.3579	-2.5953	2.837	-0.5109	1.0005	-1.5158	-0.864	-1.1121	-0.1646	0.4564	-0.4187	-0.3257	0.0604	-2.2085	-0.6582	1.5828	2.8711	0.3044	0.6114	-0.0188	0.0516	-1.8717	-0.2831	-0.6792	-0.0942	-1.1607	1.0239
P13987	CD59	Cardiometabolic	-0.4207	1.0368	0.0382	0.0279	0.2548	0.1872	-0.3335	0.0644	-0.5599	-0.294	-0.0274	0.1166	0.2081	0.3778	0.2453	-0.2608	-0.2416	-0.427	0.2569	0.3412	-0.6048	0.9719	-0.1444	-0.8146	0.2698	1.5803	0.5078	0.3426	1.0029	2.1356	0.4964	-0.0163	-0.1976	-0.0617	-0.2692	0.2989	0.0717	-0.3411	-0.1751	-0.3406	-0.2189	0.0163	0.1473	0.0196	0.6578	-0.0961	-0.3061
P13995	MTHFD2	Neurology_II	0.0447	0.136	-0.3634	0.0583	0.2502	-0.4936	-0.4401	-0.0211	0.1421	-0.0289	0.0586	-0.3524	0.1552	-0.0027	0.2145	0.8108	-0.0714	-0.1717	0.2421	0.008	-0.1877	0.165	-0.0276	-0.3452	-0.1972	-0.3259	2.2272	0.47	0.1112	-0.1834	-0.0065	-0.6291	-0.1141	-0.4075	-0.3581	5.7001	0.2971	0.1929	0.4591	-0.9122	-0.1249	0.093	-0.0809	0.0609	0.4547	-0.1226	0.1275
P14091	CTSE	Inflammation_II	-1.5929	0.6794	0.5094	0.3763	1.1045	0.6115	0.026	1.4058	-0.2304	1.2459	-0.5188	1.5108	-1.2255	-1.1209	0.3058	0.2803	-0.4491	-0.9103	0.28	-0.0792	-0.4882	-0.1351	1.5695	-0.5011	0.1585	-0.5999	-0.9672	-0.7411	-0.1675	0.7488	0.2704	-0.0346	-0.3367	-0.4632	-0.0253	-0.1449	0.4917	0.5877	-0.3453	-1.3187	0.1588	-0.9519	0.8393	-0.4796	-0.8925	0.4706	0.0025
P14136	GFAP	Oncology	-0.7338	0.6347	-0.6181	0.3314	0.2579	2.1973	-0.0089	0.6635	1.8741	0.4176	0.6265	0.5907	-0.7233	0.0902	-0.7562	-0.5414	-1.1675	-1.2156	3.2574	-0.6723	1.0955	0.2309	0.7359	-0.1968	0.4566	1.7728	1.0562	0.3616	-0.3829	-0.7283	-0.136	-0.0238	-0.1542	0.3042	-0.4313	-1.6268	-0.635	1.1285	0.3141	0.0856	0.2042	-1.0795	0.1261	-0.7891	1.7408	-1.0743	-1.2938
P14151	SELL	Inflammation_II	0.076	0.007	-0.0541	-0.2986	0.0007	-0.0314	-0.3393	1.4295	-0.1182	-0.188	-0.0296	0.0022	-0.1184	0.0815	-0.072	-0.0007	-0.5686	0.3149	0.1581	-0.1805	0.1783	-0.5298	2.18	-1.461	0.1879	-0.0445	0.108	-0.5585	0.0806	-0.0918	0.1987	0.1932	0.4446	0.4477	-0.3322	0.233	-0.2189	-0.4404	0.0946	-0.336	-0.0795	-0.1945	0.2071	0.0805	-0.3212	0.1082	0.0313
P14174	MIF	Neurology	0.3807	-0.2623	-0.1545	0.2406	-0.5566	0.4175	-1.7203	0.248	0.294	-0.2575	-0.7557	-0.1566	-0.7147	-0.4962	0.7344	-0.3341	-0.6596	-0.6832	2.9304	0.0991	-0.5059	-0.608	-0.6511	-0.1798	-0.4712	-0.3623	-0.4535	-0.0087	0.7185	0.7685	0.6835	-0.4664	-0.2288	-0.6398	0.0087	3.8275	0.5921	1.2863	-0.9	-1.1195	0.6446	-1.0868	0.4401	0.3799	0.8389	0.1687	-0.8109
P14207	FOLR2	Neurology	-0.6167	0.0113	-0.0631	-0.1005	0.2707	0.5375	-0.1305	0.6965	-0.2381	0.4237	0.388	-0.0255	0.684	0.4295	-0.1161	-0.5036	-0.0517	-0.0342	0.1171	0.3119	-0.3641	0.6679	-0.0395	-0.6454	1.1715	0.6815	0.084	0.3977	0.2805	0.6134	0.9648	0.7891	-0.2202	-0.5476	-0.2574	0.5618	0.2494	-0.5313	-0.0775	-0.3129	-0.3482	0.2848	-0.0618	0.6524	0.4536	-0.021	-0.0761
P14209	CD99	Neurology	-0.0598	0.6199	0.4192	-0.0261	0.4447	-0.0424	0.0742	-0.3961	-0.4769	-0.3023	0.048	0.2986	-0.1126	0.2145	0.0449	-0.2611	-0.0716	-0.5673	-0.2899	-0.3661	-0.216	0.3868	-0.2818	-0.6758	0.5522	1.124	0.3821	-0.1791	1.4031	2.5201	-0.2632	0.3005	-0.0021	-0.0202	-0.1381	0.2589	0.5343	-0.1559	-0.2782	-0.4117	-0.3242	-0.2449	-0.0646	-0.0408	0.4384	0.2005	-0.106
P14210	HGF	Inflammation	-0.7248	-0.4041	-0.2053	0.0991	-0.2425	-0.4373	-0.6887	0.3007	0.4782	0.1764	-0.163	0.0901	-0.3683	0.6797	0.3934	-0.5379	-0.1678	-0.5355	1.1518	0.6622	-0.7111	0.9888	-0.0979	-0.091	0.164	0.13	1.0077	0.5193	0.7145	0.1324	-0.2891	-0.1647	-0.5401	-0.606	-0.0384	1.3685	0.5128	-1.0455	0.1555	-0.9563	0.6022	-0.1265	0.254	0.4927	0.94	-0.8319	0.3585
P14317	HCLS1	Inflammation	1.4365	-0.1798	-0.5418	0.9528	0.9645	0.9423	-0.9255	0.0805	-0.2145	-1.2686	-0.4104	-0.8849	-0.0984	-0.3122	0.5401	-0.4893	-0.0735	-0.896	2.0069	-0.4687	-0.8214	0.4335	-0.7175	-0.3704	-0.2392	0.652	-0.2935	-0.2787	0.6553	1.206	1.8075	-0.6358	-0.5108	0.7338	0.7579	0.94	0.7581	1.6468	-1.0475	-0.1342	1.2658	-0.6535	0.5328	-0.4142	0.3661	-0.4459	-0.5647
P14384	CPM	Neurology	-0.087	1.1775	0.6201	0.1504	0.606	0.6903	0.6626	-0.1509	-0.2285	0.8769	-0.2517	-0.0594	-1.037	-0.3725	-0.5159	0.0197	0.2363	-0.4929	-1.2006	0.518	0.1674	-0.8389	-0.194	-0.0847	0.5547	-0.0118	0.2201	-0.4508	1.0925	0.9093	0.516	-0.4252	-0.046	-0.2403	-0.1809	0.4819	0.5058	0.0465	0.7974	0.0457	-0.1623	-0.2159	0.6935	-0.7114	-0.3633	-0.4278	0.3404
P14415	ATP1B2	Cardiometabolic_II	-0.1056	-0.1706	0.0865	0.693	-0.4288	0.2372	-0.5755	0.068	0.2535	0.2995	0.0384	-0.4829	-0.2403	-0.7498	0.307	0.0626	-0.1949	0.5109	-0.5018	0.0566	-0.2491	0.4083	0.7836	-0.1143	-0.173	-0.2205	-0.8289	0.804	0.526	-0.1347	-0.103	0.9576	-0.3726	-0.2575	0.5108	0.1995	0.9043	-0.0668	0.1746	-0.8933	1.6476	-0.2702	-0.0533	-0.1207	0.0035	0.0063	0.2038
P14543	NID1	Cardiometabolic	-0.1022	0.6834	0.2381	0.0442	0.0965	0.1273	-0.6763	0.6043	-0.1322	0.2416	-0.1896	0.2218	0.3671	-0.4268	0.06	-0.4892	-0.5842	-0.4569	0.0512	-0.4153	-0.9231	0.0894	0.1344	0.4848	-0.0977	0.065	0.0657	-0.0405	0.4703	0.256	-0.1051	-0.7458	-0.5494	-0.7786	0.5941	1.6119	0.0682	-0.318	-0.4175	-0.3496	0.0933	-0.0792	0.1518	0.1153	1.1402	-0.0497	-0.3256
P14555	PLA2G2A	Cardiometabolic	-1.4411	0.9225	-0.2658	0.5192	-0.5821	-1.2319	-0.7042	0.219	1.2276	-0.7097	-0.8599	-0.8294	1.9506	1.1522	1.7771	-0.9665	-0.099	-1.3198	4.0911	1.8093	-0.3367	4.1604	1.0952	0.7952	-0.3366	1.8275	1.6225	2.0735	1.3189	-0.3115	0.2994	-1.3835	-0.446	-0.4729	0.9771	1.8308	0.4735	-0.9873	0.6152	-1.4795	-0.6874	-0.9247	-0.9694	0.282	4.3119	-0.6925	0.279
P14625	HSP90B1	Neurology	-0.3507	0.5599	0.9656	0.3146	-0.7468	1.1861	-0.1389	-1.2986	-0.0034	0.1179	0.8035	-0.2998	-0.1012	-0.6751	-0.6013	-0.1924	4.2633	-0.6376	-0.1123	2.228	1.252	-0.4091	-0.6781	0.212	0.5014	0.104	-0.3895	0.7513	-1.1603	-0.7855	0.0776	0.3495	-0.0783	0.5522	-0.4339	2.0246	-0.2828	-0.0771	0.4578	-0.431	0.0229	2.3968	-0.3334	-0.0962	-0.2353	0.2674	1.062
P14649	MYL6B	Neurology_II	-0.5089	-1.1355	0.7188	-0.1288	1.9334	-2.5657	4.0406	0.7035	-0.4011	0.2039	0.3523	-0.5211	-0.6463	-0.3798	-0.1672	-0.7216	1.3617	0.1202	0.7124	-0.8817	-0.4073	0.0959	-0.4056	0.5687	-0.6685	1.2417	-2.0263	0.2516	-0.2219	0.9843	-0.0028	-0.5324	0.0028	-0.2326	0.2697	0.5405	-1.3446	-1.2106	-0.0368	-0.8772	-1.0376	0.7199	0.5775	-1.3053	-1.1104	1.6757	-1.1079
P14778	IL1R1	Neurology	-0.4728	-0.289	-0.1523	-0.424	0.4947	0.0986	-0.0517	0.462	0.0493	0.1605	0.0375	0.6484	0.3691	0.0846	-0.0308	0.0611	0.1047	-0.2187	-0.3093	-0.299	-0.1296	-0.2019	0.1978	-0.035	1.0876	0.538	0.1309	0.3347	0.5714	0.6641	0.0325	0.4013	-0.4591	-0.5255	-0.0348	0.3446	0.1934	-0.7581	0.4645	-0.3003	-0.1619	-0.0225	0.1805	0.0554	0.4057	0.0319	-0.0133
P14780	MMP9	Neurology	-1.2283	-0.2048	-0.2954	0.0941	-0.2847	-0.2452	-2.0827	0.915	0.3813	-0.477	1.2764	0.147	-1.4915	0.1376	0.7147	-0.6792	0.6359	0.3379	1.8823	1.1745	-0.9983	0.5054	0.2579	0.2616	-0.2861	-0.5003	0.8376	0.4121	-0.2957	0.5337	-0.4063	0.9529	-0.6908	0.2028	-0.5547	0.6412	0.783	-0.9562	-1.0486	-2.1904	1.6539	-0.2267	0.1369	1.4293	-0.3231	-0.9083	1.4604
P14784	IL2RB	Inflammation	0.0516	-0.2448	-0.0556	0.1499	-0.0007	-0.3855	-0.6329	-0.5298	0.0785	0.0007	-0.205	0.3326	0.1412	0.1894	-0.1824	-0.0043	0.0361	0.2904	0.4121	-0.2186	0.2461	-0.5716	1.2082	-0.4167	0.6297	-0.046	0.1393	0.0471	-0.0495	0.4402	1.7264	0.328	0.3178	-0.049	-0.0756	-0.0036	0.0122	0.1817	-0.0958	-0.7551	-0.6607	-0.8787	-0.1873	-0.0602	-0.2456	-0.0866	-0.1916
P14854	COX6B1	Cardiometabolic_II	0.8546	0.2082	-0.3606	-0.449	0.5636	-0.2046	-1.037	0.7693	-0.1823	-0.2144	-0.3126	0.4136	0.3975	-0.1563	-0.6859	-0.4298	-0.8361	-0.4619	1.9258	-0.3257	-1.4353	2.405	-0.4844	-0.4667	1.1679	1.1864	0.373	-0.0166	1.9467	1.3145	0.194	-1.4969	-1.3596	-0.3494	3.0408	1.286	0.5918	3.5462	-0.4216	1.0644	-0.3204	-0.7125	-0.6877	-0.2733	2.2881	-0.8189	-0.0472
P14868	DARS1	Neurology	1.3249	0.0066	-0.7833	0.8953	0.815	1.6008	0.8306	0.7744	0.5443	-0.5592	-0.174	-0.7228	-0.0941	-0.2886	0.994	-0.2983	-0.2643	-0.8533	2.0336	-0.1971	-0.7775	-0.8446	-0.1998	0.8332	-0.0506	-0.3333	-0.4958	-0.0303	0.5392	0.8211	1.1149	0.2767	-0.5476	-0.15	0.8104	1.3192	0.7405	3.0457	-0.9979	-0.1477	0.4505	-0.0066	0.137	-0.3121	0.6284	0.1993	-0.8413
P14902	IDO1	Cardiometabolic_II	-0.1599	1.0151	0.224	1.1649	0.6603	1.7734	-0.1648	-0.9054	0.8272	0.3706	0.2365	0.5407	0.7257	-0.3	-0.2168	-0.6589	0.1263	-0.6842	-1.1481	0.3393	-0.5593	-0.953	-0.5398	-0.4675	0.409	0.3193	-0.2415	0.6114	1.4003	0.1977	1.0478	-0.6286	0.4957	-0.0879	-0.3446	0.2252	0.929	-0.5529	0.0273	-0.0168	-0.3325	-0.7709	0.5214	-0.5961	0.1676	0.698	-0.0211
P14902	IDO1	Inflammation_II	-0.0521	0.7507	0.4369	0.9938	0.5495	1.5493	-0.4812	0.1463	0.6357	-0.0872	0.2233	0.3826	0.7293	-0.1963	-0.1861	-0.6125	-0.0454	-0.7856	-1.1196	0.0034	-0.5959	-1.2302	0.003	-0.5357	0.4091	0.2703	-0.1834	0.4027	1.4678	0.24	0.9569	-0.7798	0.1476	0.6304	-0.3218	0.3607	0.826	-0.6845	-0.2776	-0.4108	-0.2674	-0.9162	0.433	-0.6919	-0.0073	0.5539	-0.003
P14902	IDO1	Neurology_II	-0.0153	1.5248	0.3186	1.2131	0.8002	1.742	0.0626	-0.5252	0.8434	0.4158	0.1988	0.418	0.7383	-0.2529	0.0533	-0.6564	-0.1668	-0.8526	-1.3845	0.302	-0.7953	-0.6275	-0.3113	-0.3784	0.3054	0.1206	-0.355	0.2983	1.4418	-0.0709	1.0418	-0.5777	0.2496	-0.0085	-0.1469	0.5559	0.8447	-0.6902	-0.0865	-0.1173	-0.2685	-0.7673	0.4868	-0.7023	0.2014	0.6422	-0.0197
P14902	IDO1	Oncology_II	-0.1084	1.1606	0.3689	1.3138	0.7752	1.8194	-0.2267	-0.5949	0.82	0.4212	0.2491	0.5452	0.7782	-0.2487	0.0103	-0.733	-0.1187	-0.729	-1.1342	0.3509	-0.884	-0.876	-0.3148	-0.4204	0.4329	0.304	-0.306	0.4887	1.4373	0.2821	1.1518	-0.6196	0.3788	0.0591	-0.3192	0.24	0.855	-0.5419	-0.131	-0.0587	-0.3474	-0.535	0.6307	-0.6518	0.0396	0.8412	-0.1554
P15018	LIF	Neurology	-0.5017	0.5121	-0.5999	-0.3295	-0.7053	-1.2114	-0.9279	1.2004	1.0237	0.3322	-1.571	0.0032	0.8873	-0.5311	0.5054	-0.5596	-0.1057	-0.4007	1.4973	1.0875	-0.7927	1.61	0.3267	-0.0686	1.7171	1.0152	-0.1313	2.593	1.2734	-0.8781	-0.6854	-1.0987	-0.9398	0.0361	1.2101	1.8937	-0.3317	-0.4994	0.0404	-1.2389	0.7708	3.0987	0.4172	1.0059	1.5396	-1.3041	0.959
P15085	CPA1	Cardiometabolic	-0.9884	0.3235	-0.7323	-1.0636	0.0639	0.5414	0.7513	-1.1559	-0.413	0.1868	-0.0976	-0.7212	-0.0853	0.129	-0.012	0.9849	-1.6965	-0.8753	0.2068	0.8022	-0.1818	-1.754	1.79	1.8279	0.255	-0.5792	0.6151	-0.3859	0.005	-0.0595	-2.6804	-0.4353	0.0656	-0.3429	0.9462	1.7958	1.3317	0.2833	-0.1625	-0.4299	-0.8936	0.1515	1.7196	1.0268	1.6551	0.0201	-0.5293
P15086	CPB1	Cardiometabolic	-0.9705	-0.1527	-0.6931	-1.0292	-0.0325	0.9138	0.4147	-0.0019	-0.6791	0.3494	-0.5683	-0.1328	-0.6574	-0.4493	0.3751	0.6144	-1.7474	-0.8668	-1.0346	0.1827	-0.4004	-0.549	2.0578	1.5421	-0.1075	-0.4289	0.8675	-0.5119	0.2057	0.7846	-2.5354	-0.8721	0.3323	0.1893	1.5412	1.7115	1.4104	0.5309	0.1649	-0.93	-0.4068	0.1172	1.0975	0.9672	1.8658	0.2441	-0.4308
P15090	FABP4	Cardiometabolic	-1.3123	0.8199	0.8533	0.5094	-0.7357	-0.6393	-0.3384	-0.0533	-0.8276	1.2542	-0.3118	-0.3754	-0.2415	1.0759	0.1332	-1.7504	-0.7906	-0.7487	3.4583	0.617	-0.1326	1.8675	-0.6587	-2.1788	-0.0258	1.6499	2.0464	1.4666	1.0677	4.1089	1.0882	0.0762	-0.1067	0.1661	0.7987	1.0286	1.6841	0.0207	-0.1604	-1.1015	-1.5858	-0.5826	-0.7347	0.4206	0.1169	-1.6933	-0.3511
P15121	AKR1B1	Oncology	0.5437	3.6454	-0.7662	1.437	0.288	1.4492	-2.7992	-0.1481	-0.2647	4.1651	-0.91	-0.0327	-0.6514	-1.1247	0.0514	-0.8989	-0.8579	-0.9945	1.4926	-0.8402	-1.5398	-0.4842	-0.4165	-0.7733	-0.2666	-0.4505	-0.3768	-0.2034	0.4919	0.9751	0.6171	-0.3897	0.0376	0.4976	0.9278	2.6202	0.2639	1.9797	-1.1133	-1.3724	0.0781	-0.6073	1.092	0.0106	-0.3197	-0.3556	-0.576
P15144	ANPEP	Cardiometabolic	-0.6458	0.2701	0.2022	-0.1274	0.2779	-0.2962	0.0272	0.0307	0.2583	0.8613	-0.0788	-0.0018	-0.2507	0.1782	-0.3647	-0.395	-0.1012	-0.2824	0.6424	-0.0531	0.034	0.2941	0.5583	-0.0918	0.2555	0.5584	0.322	0.3181	0.7716	-0.0392	-0.1738	0.4602	0.2701	-0.8644	-0.2634	0.5553	-0.1012	0.1067	0.0608	-0.5346	-0.0131	-0.5855	0.3838	-0.13	0.1333	-0.3152	0.4149
P15151	PVR	Neurology	-0.6225	0.3086	-0.5739	-0.9395	0.3202	-0.392	-0.3596	0.3958	0.0187	0.5082	0.0134	0.2906	0.0226	0.1184	-0.366	-1.3378	-0.8355	-0.5403	0.7243	0.7757	-0.3002	0.5498	0.3803	0.1445	0.4121	0.0798	0.3519	-0.1457	-0.1124	0.4312	-0.0278	0.5505	-0.5013	-0.2302	-0.5053	0.8435	0.1197	-1.2003	0.2143	-0.502	-0.4911	-0.0018	0.6527	0.5201	0.5398	0.4764	-0.3553
P15248	IL9	Oncology_II	-0.2064	-0.4871	-0.0766	0.1018	0.4648	0.0867	-0.5199	-0.2431	0.6676	-0.8208	0.8032	0.1733	0.3449	-0.755	0.2913	-0.4386	1.1094	-0.5294	0.0021	-0.2486	0.404	-0.5628	2.2163	0.4102	1.3255	0.4969	-0.2493	0.1044	-0.3501	0.0014	0.1797	-0.0458	1.2149	0.0238	-0.3454	0.2343	-0.5538	-0.0516	-0.2509	-0.7661	-0.3741	1.341	-0.9277	0.1792	-0.7645	-0.1562	-1.4739
P15260	IFNGR1	Inflammation	-0.178	0.1984	-0.0007	0.0647	0.6148	0.3575	0.0087	0.1839	-0.3621	-0.023	0.109	0.2363	0.2389	0.252	-0.0156	-0.1062	-0.1793	-0.4137	0.2699	-0.2423	-0.5949	0.325	0.1268	-0.4383	0.1279	0.766	0.0165	-0.0109	0.7973	1.3617	0.0181	0.3556	-0.0963	-0.027	-0.3284	0.4342	0.0948	-0.2217	-0.0665	-0.297	-0.1651	-0.3081	-0.0645	0.1271	0.6047	-0.0454	-0.6283
P15289	ARSA	Neurology	0.5975	-0.063	-0.0293	-0.1327	-0.0072	0.2621	0.0589	-0.2412	-0.4547	0.3557	-0.4305	0.2222	0.0056	-0.3003	-0.3775	0.2466	-0.5613	-1.1902	0.3488	0.0165	-0.3562	0.1743	-0.501	0.1924	0.9078	-1.2451	0.8273	-0.4768	0.3633	0.9553	0.3856	-0.2896	-0.0986	0.4828	-0.6461	0.7846	0.4221	0.097	0.4774	0.0036	0.3526	-0.2113	0.4926	-0.6888	-0.8565	-0.536	-0.01
P15291	B4GALT1	Inflammation	-0.6271	0.0494	-0.0445	-0.5818	0.1154	0.0661	-0.3202	0.5028	-0.0002	-0.2253	0.0522	0.4577	0.0299	-0.0274	0.1903	-0.0678	-0.683	-0.5546	0.2842	0.1155	-0.758	0.5772	0.2887	-0.1574	0.5265	1.0191	0.2917	0.2419	0.3472	0.6605	-0.1368	0.9703	-0.4225	0.4389	0.954	0.6654	0.0521	-0.4019	-0.0525	-0.3806	-0.347	0.0323	-0.2986	0.1508	1.0393	-0.0921	-0.2995
P15311	EZR	Neurology	-0.3904	0.0077	-0.0288	0.0317	-0.0949	0.1386	-0.3308	-0.4355	-0.0302	0.084	-0.3392	-0.0672	0.1593	-0.1182	0.0763	-0.2762	-0.1436	-0.3935	1.0948	-0.0199	-0.0378	0.0154	-0.4177	-0.0178	0.3342	0.2084	0.4643	-0.0697	0.8859	1.1376	0.7966	-0.0077	-0.396	0.7948	-0.4508	2.6717	0.7403	-0.3906	-0.2575	-0.3679	0.2982	-0.0312	-0.2754	0.4315	0.1483	-0.423	0.117
P15328	FOLR1	Oncology	0.0522	0.4397	0.0995	-0.2422	0.9762	0.843	-0.6156	-0.0866	-0.4164	0.3552	0.1867	0.3764	1.412	0.0814	-0.644	-0.3324	-0.2028	-0.7126	-0.0747	-0.2464	0.8515	0.2588	-0.0716	-0.5226	1.0869	0.9167	0.4045	-0.0061	0.9672	1.8528	0.0497	0.6017	-0.0996	0.1583	-0.1992	-0.1516	-0.3959	-0.097	0.0636	-0.2415	0.0224	-0.281	-0.5282	-0.5392	0.494	0.0726	-0.8644
P15336	ATF2	Neurology	0.6614	-0.0316	0.0024	-0.8349	0.5665	0.1137	1.0147	0.311	-0.9389	0.3951	0.9974	-0.4885	-0.0146	3.7791	4.0411	0.0074	-0.8878	0.8742	0.3178	-0.5592	-0.5707	-0.257	0.623	5.1575	-0.176	0.0125	-0.2367	4.3577	1.1639	-0.5561	1.2727	-0.4715	-0.2643	-0.3098	-0.0601	1.2249	0.05	-0.0024	-0.4084	-1.1845	0.1296	-0.2612	2.0946	4.5448	-0.294	0.106	-0.0682
P15502	ELN	Cardiometabolic_II	-1.0812	0.9384	0.5328	-0.6704	0.1189	-0.1585	0.8792	-0.3854	-1.065	0.2845	-0.6473	0.7112	-0.4213	0.4467	-0.8749	-0.0408	-1.0293	-2.556	0.7439	0.3927	0.1269	0.9001	-1.0397	-0.6508	0.3368	1.5061	0.0999	0.6757	1.4784	1.7448	0.0207	-0.3096	-0.3722	-0.8904	0.5886	0.1042	0.3165	-0.449	0.0184	-0.719	-0.5396	-0.3248	0.3024	-0.7843	0.8899	0.909	-1.0434
P15509	CSF2RA	Neurology	0.3909	0.0146	-0.5681	-0.9632	-0.0264	-1.9259	1.0868	-0.0821	-0.5257	0.423	-0.2837	1.8635	0.4136	-0.1113	0.3871	0.5565	0.2978	-0.5186	0.1531	-1.0461	-1.6859	1.4493	-0.8492	-0.1085	-0.1049	0.0324	0.5233	-0.0146	0.5003	0.5067	-0.8251	-1.053	0.0483	0.3556	-0.2316	-0.6112	-0.9238	-1.5249	0.1817	-0.165	-0.2286	-0.933	-0.2542	-0.1611	0.0787	-0.4664	-1.1407
P15514	AREG	Oncology	-0.8044	-0.2964	0.0378	-0.5641	-0.2418	-0.3927	-0.2913	0.0375	0.081	0.9241	-0.3635	0.4815	0.8379	0.3562	-0.7038	0.5336	-0.137	-1.7112	0.8781	0.2482	0.2858	1.9857	0.6599	-1.0078	1.1006	0.0449	-0.2838	0.7544	0.3947	0.8793	-0.1893	3.1956	-0.3433	-0.6863	0.4807	-0.0036	0.5432	-1.1319	-0.846	0.3737	-0.1741	-0.0674	-0.3923	0.1679	0.3676	0.1713	-0.2562
P15529	CD46	Cardiometabolic	-0.2629	0.1287	0.2205	-0.0515	0.6591	0.409	-0.0394	0.1956	-0.432	-0.1369	0.0552	0.3141	0.1905	0.2985	-0.3821	-0.1312	-0.2236	-0.6843	0.052	-0.2676	-0.4912	0.5242	-0.1508	-0.792	0.4195	0.7788	0.4586	0.0226	0.8383	1.4758	0.1195	0.7295	-0.032	-0.0186	-0.1168	3.0807	-0.0312	0.0523	-0.1499	-0.1955	-0.2944	-0.2899	-0.0886	-0.2554	0.858	0.2221	-0.3294
P15531	NME1	Inflammation_II	0.408	-0.4259	-0.1517	-0.3181	-0.3978	-0.1934	-0.489	-0.0497	-0.0839	0.0912	-0.5044	-0.314	-0.2453	-0.377	0.0894	0.2067	-0.0845	-0.1557	-0.0763	-0.276	0.0441	0.0108	0.2636	0.2637	-0.101	0.0365	0.0711	-0.1603	-0.4499	0.1001	0.0716	-0.2442	-0.0826	0.698	0.1704	-0.0861	0.308	0.0528	0.1486	-0.3982	-0.2139	-0.229	0.0237	-0.3979	-0.3831	-0.0453	-0.2752
P15692	VEGFA	Inflammation	-0.7221	-0.0168	-0.2675	0.1135	0.2041	-0.0366	-0.3813	0.6886	-0.0309	-0.2908	-0.0624	0.492	0.4277	0.2226	-0.1211	-0.2511	-0.297	-0.6242	1.2842	0.2192	-0.6226	0.9964	0.0582	-0.1368	0.448	1.1007	0.3333	0.5208	0.7753	1.663	0.0912	0.3612	-0.6597	-0.1974	1.8683	1.8601	0.4768	-0.0085	-0.304	-0.175	0.8198	0.0085	-0.3344	0.402	1.3323	-0.2736	0.3147
P15848	ARSB	Oncology	0.6841	0.6696	-0.1115	0.0904	-0.0125	0.3994	-0.3833	0.8426	0.2099	0.102	-0.5037	0.2439	-0.1356	-0.4813	-0.4927	-0.5008	-0.1072	-0.9516	0.7124	0.448	-0.4756	-0.0716	-0.4364	-0.0036	0.8797	-0.6625	-0.5873	-0.3796	0.0026	-0.3437	0.4417	-0.0187	0.0137	0.0056	0.8843	1.0778	1.284	1.2168	-0.0026	-0.48	0.3072	-0.2762	-0.207	-0.5171	-0.0175	-0.0295	-0.4224
P15907	ST6GAL1	Cardiometabolic	-0.54	0.2728	-0.3337	-0.2999	-0.3594	-0.057	-0.4425	0.841	0.5127	-0.1314	0.2604	0.6583	1.1124	1.4684	0.5429	-0.3374	-0.5373	-0.381	1.251	0.4162	-0.4862	1.3393	-0.1791	-0.2498	0.6788	0.6025	0.6253	0.7778	0.7438	0.28	0.4443	-0.2881	-0.602	-0.3737	0.8874	1.7752	0.518	0.0736	0.0283	-0.7339	0.4685	-0.0934	-0.2868	0.37	2.1087	-0.1197	0.1192
P15927	RPA2	Inflammation_II	-0.8264	-0.6303	0.1193	0.4996	-0.8584	-0.2064	-0.0245	0.3148	-0.3012	-0.5708	-0.2792	0.5082	-0.0207	-0.07	-0.0611	-0.2728	-0.2325	0.3091	0.6308	-0.7315	0.3592	1.0156	0.759	-0.1417	-0.4378	-0.0964	1.1591	0.1106	0.9859	0.126	-0.134	-0.0541	-0.1781	0.4673	0.1723	3.4893	-0.1711	0.8752	-0.1897	-0.3045	-0.1706	-0.2797	0.16	0.2154	1.211	0.0453	0.3042
P16035	TIMP2	Cardiometabolic_II	-0.5011	0.2885	0.4193	-0.0377	0.3003	0.0092	-0.0968	-0.3849	-0.0987	-0.2078	-0.1488	0.2278	0.0691	-0.0649	0.044	-0.1498	-0.452	-0.6791	0.0861	-0.5071	-0.4162	-0.1513	-0.0795	-0.5897	0.5728	0.5322	0.1374	0.1273	0.5735	1.5115	0.2714	0.187	0.0342	-0.0092	-0.0393	0.3908	0.1668	-0.179	-0.2785	-0.6445	-0.1876	-0.1431	-0.531	-0.0484	0.2873	-0.0117	0.0713
P16066	NPR1	Cardiometabolic_II	0.2791	0.0983	0.2484	-0.1363	0.077	-0.1848	-0.0014	0.0833	-0.7007	1.6321	0.1673	-0.6127	-0.3897	-0.312	2.0211	0.0574	0.2001	0.1809	0.0879	-0.0527	-0.0673	-0.3392	0.7861	0.0579	-0.3887	-0.4682	0.1557	0.0837	0.013	-0.1998	-0.4579	3.031	-0.0386	-0.5999	-0.2828	-0.3367	0.0612	-0.1683	0.6244	-0.3018	-0.2077	-0.4797	0.0239	0.3274	0.1302	0.0014	-0.0689
P16109	SELP	Cardiometabolic	-0.118	0.7979	0.0004	-0.2541	0.1252	-0.701	-0.6489	0.2836	0.0725	-0.3043	-0.4076	0.8269	-0.0004	-0.048	-0.1886	-0.1171	-0.3335	-0.4545	0.4388	-0.1513	-0.3297	0.2338	-0.6907	-0.5547	-0.3776	-1.052	-0.0949	0.3306	0.9902	0.1782	0.0384	0.1994	-0.4535	-0.0985	0.8272	1.3133	-0.1273	0.6751	-0.6902	-0.4687	0.4266	-1.314	0.1417	-0.6306	0.1815	-0.4704	0.3571
P16112	ACAN	Cardiometabolic	-0.1855	0.7904	0.3653	0.2018	0.8086	0.6243	0.2767	-0.1835	-0.2442	-0.0326	0.2985	0.1983	-0.2839	0.0812	-0.5235	0.276	-0.1484	-0.8769	0.1885	0.0252	-0.2674	-0.5312	0.0378	-0.1837	-0.168	0.2468	-0.4879	0.2717	0.6938	0.5309	-0.092	0.3826	0.2107	-0.1737	-0.3209	-0.0889	0.2506	-0.277	-0.1006	-0.0559	-0.6417	-0.5954	0.3132	-0.0548	0.6249	0.8323	-0.5467
P16233	PNLIP	Inflammation_II	-0.9146	-0.465	-0.9893	-0.8207	0.3993	0.6451	0.8418	-2.1257	0.1837	-0.0962	-0.1863	-0.0494	0.145	0.0278	-0.976	1.4691	-1.4602	-0.3057	-2.2761	0.1506	-0.5968	-2.4417	1.5948	1.7543	0.2486	-1.0135	0.9717	-0.9074	0.4427	-0.1519	-2.6608	-2.3483	0.1781	-0.3657	2.0308	2.3369	1.1747	0.7575	0.8833	-0.435	-1.021	-0.2177	1.2687	0.4286	1.5622	-0.7265	-0.3851
P16234	PDGFRA	Cardiometabolic	-0.2697	0.2238	0.8008	0.3546	0.2924	0.5228	0.1906	-0.4801	-0.6603	0.2827	-0.3687	-0.2601	0.0623	-0.0025	-0.2921	-0.1168	-0.0302	-0.8571	0.5192	-0.3293	-0.5786	0.5857	0.4921	-0.12	-0.428	0.3105	-0.3553	-0.0264	1.0538	0.9806	0.044	0.4276	0.0884	-0.3496	0.0025	0.7318	-0.1996	-0.2277	-0.0158	0.1218	-0.3439	-0.4006	0.0623	-0.1022	0.5548	0.0392	-0.2336
P16278	GLB1	Neurology	0.1724	0.4594	0.2893	0.4977	0.0096	-0.353	-0.4585	0.4837	-0.1039	0.1924	-0.517	0.2982	-0.3784	0.0015	-0.588	0.0249	-0.448	-1.2192	-1.0075	-0.4618	-0.6059	-0.8303	-0.1052	0.0271	0.1123	-0.522	-0.1202	-0.9137	0.1344	-0.6824	-0.4098	-0.0015	0.1713	0.4656	0.3865	0.5572	1.4126	0.4031	0.4802	-0.2441	-0.5965	-0.1646	0.7062	-0.9721	-0.3244	-0.1501	-0.2696
P16284	PECAM1	Neurology	-0.3027	0.5292	0.0362	-0.0147	0.4954	-0.1836	0.0482	0.108	-0.3932	0.4674	-0.4223	0.4621	-0.0562	0.1917	-0.0581	-0.2955	-0.0075	-0.8332	0.6812	-0.6319	-0.3679	0.1691	-0.3259	-0.3481	0.2931	-0.6495	-0.1566	-0.033	0.8633	0.127	0.0138	0.0786	-0.0215	-0.096	0.2111	0.4279	-0.0093	0.5218	-0.0686	-0.8552	0.0075	-0.9011	-0.0717	-0.0769	0.1139	-0.2364	-0.2423
P16410	CTLA4	Cardiometabolic_II	-2.8889	0.7684	-0.1247	0.9839	0.5321	0.0887	0.3343	-0.4114	-6.336	-0.1119	0.7214	0.5683	0.218	0.4433	-1.6862	0.3711	-0.4015	-0.0622	-1.2487	0.7705	1.1015	-0.201	-1.1692	0.3318	-1.5195	0.649	0.6612	-0.0424	-5.7526	1.1605	-1.2068	0.2809	0.5335	-1.1301	-1.0804	-0.0123	-0.4521	0.8675	-2.8781	-0.0559	-3.5755	0.011	0.3486	0.6126	-0.5132	-0.4506	0.6957
P16422	EPCAM	Inflammation	-0.7665	1.8802	-0.012	0.4096	0.0086	1.9628	2.2175	-0.0086	-0.1867	-0.2594	-0.1598	0.835	-0.6395	-0.9002	-1.6011	0.9602	0.8606	-0.9637	-1.5101	1.1923	2.0696	-1.1672	-0.8682	2.1598	2.5936	-1.8234	1.5379	-1.4677	0.9331	0.8833	-1.5382	1.6206	0.1269	1.5804	-0.4888	2.9567	-0.4491	-1.5348	1.778	0.1865	0.6262	-1.6348	-0.2599	-0.716	2.5412	-0.0219	-1.213
P16442	ABO	Inflammation_II	0.3534	1.1232	0.9197	0.9124	0.1708	0.0281	0.2943	-3.9043	1.3583	-4.3935	0.3316	1.742	-0.0347	-3.8967	-4.4074	-3.8151	-5.0235	1.3171	-0.117	0.5171	-3.1131	-4.3501	-0.1989	-0.4765	-3.6131	-0.213	0.1334	-3.3201	-4.1424	-3.1813	-2.4501	-4.8042	-5.3156	-0.3725	-2.3892	0.432	1.2338	-0.6537	0.9025	0.4584	-3.1296	0.6509	1.4075	-0.3217	-0.1633	0.436	-4.2196
P16444	DPEP1	Neurology	-0.1517	0.2243	-0.059	-0.7126	0.6102	-0.5077	-1.2021	0.1655	0.6877	-1.5654	0.3232	0.0862	-0.2658	-0.6949	-1.9912	0.136	-0.1723	-0.4404	-0.5096	-0.9498	-0.2676	0.1766	0.1658	-0.5452	0.8483	-0.2136	-0.5279	-0.7986	0.6132	-1.0933	0.2607	0.7205	-0.9492	-1.2169	-0.2416	-0.7515	0.2704	-0.2202	0.3995	0.1544	0.0728	0.0183	0.1858	0.2581	-0.3987	0.0932	-0.2938
P16455	MGMT	Inflammation	2.5647	0.4796	-2.3083	1.3753	1.8419	2.3066	-1.3687	0.3759	0.3709	-2.0694	-1.2779	-1.5471	0.4873	-0.1143	0.3286	-0.0956	-0.6798	-0.9352	0.8279	-1.017	-0.605	1.7974	0.4294	-0.5722	-0.1465	0.0558	-0.916	-1.0585	1.0972	1.5635	0.2998	-0.3537	-0.3187	0.1063	1.2303	-0.3009	0.2629	4.103	-1.204	0.3251	0.2171	0.2518	-0.0798	-0.9137	1.2794	-2.8817	-0.1346
P16562	CRISP2	Oncology	-0.1065	0.8221	-0.125	-0.0064	0.3556	0.4909	-1.3079	0.8602	0.3507	-0.9163	-0.3186	0.5185	-0.6529	-0.468	0.3904	0.382	-0.1086	0.542	-1.0465	-1.1834	0.0212	-0.04	0.5393	0.6361	0.4994	-0.4893	0.6645	-0.2521	0.4341	-0.1622	-0.2235	-0.0547	0.0816	0.4687	-0.5008	0.1421	0.9051	0.745	-1.0199	-1.1667	0.5214	0.4898	0.1331	0.7952	-0.0915	-0.1609	-0.1244
P16581	SELE	Cardiometabolic	-0.6579	-0.0519	-0.5627	-0.6102	-0.1511	-0.8257	-0.8556	0.7788	0.4434	0.6465	-0.9493	0.3294	0.0577	0.606	0.6122	0.326	0.4269	-1.8118	0.0818	0.0346	-0.2202	1.4583	-0.1913	-0.0511	0.3481	-0.4716	0.2335	0.7053	0.3041	0.464	0.3295	0.6616	0.5693	-0.0355	-0.0664	0.9953	0.2	-0.4404	-0.1903	-1.4342	0.0642	-1.1065	0.5035	-0.1684	0.7459	-0.4479	0.941
P16671	CD36	Inflammation_II	-0.2615	-0.2328	0.0311	0.2136	-0.68	-0.0894	-0.0218	-0.0791	-0.5503	0.2039	-0.45	0.4445	0.0035	0.267	-0.3323	0.1806	-0.0667	-0.4958	0.7252	-0.1516	-0.1597	-0.0897	-0.1074	-0.168	1.1628	0.9781	0.4549	-0.1135	0.5253	1.5899	0.2898	-0.4137	-0.6357	0.3791	1.0051	0.0705	0.3063	-0.0755	0.0107	-0.6656	-0.1085	0.0042	-0.4258	-0.6723	0.3576	0.4931	-0.9247
P16860	NPPB	Cardiometabolic	-1.3573	-1.2485	2.4159	-0.8866	2.6635	-1.2497	-1.4584	-0.7398	-3.619	2.543	-1.4393	-1.0158	1.0296	1.533	-2.4541	-3.2099	-2.1213	-0.2915	2.1013	-2.023	-5.7596	4.3363	-0.0083	-0.5721	-0.7897	4.9201	-2.4354	0.9698	2.8452	4.5578	-0.6972	-1.4898	-0.5656	3.3306	2.4277	-2.2726	1.3717	-2.9343	1.7732	-1.9425	0.0083	3.5404	-3.0512	0.4585	0.3813	1.3835	-1.6049
P16870	CPE	Oncology	-0.1554	0.4277	0.593	0.4405	0.4652	0.0554	0.0217	-0.1628	0.1476	-0.0812	0.0756	0.2793	-0.15	0.3307	-0.4543	-0.858	-1.6103	-0.0238	-0.7022	0.0936	-0.5265	-0.6005	-0.2221	-1.9066	0.2211	-0.2242	-0.2692	-0.3979	0.357	0.0068	0.0946	-0.4244	0.0932	-0.0068	-0.1118	1.1444	-0.1814	-0.2877	0.1027	0.3506	0.4253	-0.3317	-1.0319	-0.323	-0.2217	0.0093	-0.5061
P16871	IL7R	Neurology	0.4868	-0.2493	0.049	-1.1235	-0.526	-0.664	0.7703	0.8996	0.0003	1.4494	-0.1913	0.285	-0.327	-0.1568	0.595	0.2413	1.1081	-0.9346	-1.066	-0.9026	-0.3373	0.535	0.237	-0.2554	0.9659	0.6853	-1.7164	-0.4209	0.9189	1.3282	-0.059	-0.1716	0.253	-0.1739	0.0365	0.2686	-0.3095	0.4244	-0.3328	-0.1594	-0.6153	-0.9225	0.2002	0.1452	0.4087	-1.011	-0.475
P17050	NAGA	Inflammation_II	0.4553	0.1508	-0.0187	-0.0583	-0.0327	0.0946	-0.0363	-0.3606	-0.157	0.6352	-0.0643	0.1662	-0.7885	0.1963	-1.1083	-0.0049	-0.3193	-0.6941	-0.4535	-0.0453	-0.4877	-0.9761	0.5097	-0.4727	0.2375	-0.2895	-0.1385	-0.6415	0.4351	-0.2845	0.1181	0.3019	-0.1139	0.5892	0.3207	0.7942	1.0985	0.3123	0.4795	-0.2162	-0.3656	0.0957	0.3813	-0.2118	-0.7016	-0.1875	-0.3971
P17174	GOT1	Cardiometabolic_II	-0.1084	0.7529	0.3168	0.05	0.2653	-0.0381	0.0608	-0.4595	-0.193	0.5456	0.0364	-0.0515	-1.3337	-0.6114	-0.1554	-0.0327	-0.3667	0.0198	1.2913	-0.1457	0.2585	-0.4606	-0.983	-0.3327	0.5627	-0.313	-0.5924	-0.4003	1.0611	0.8201	-0.0355	0.0106	-0.2773	-0.5893	-0.4174	5.7378	0.8343	-0.1475	-0.0947	-0.4624	0.1533	-0.4351	0.597	0.0267	0.8701	0.3594	-0.0567
P17181	IFNAR1	Oncology_II	-0.1317	0.0415	0.0984	0.2776	0.6033	-0.0805	0.5197	0.3124	-0.4071	0.1598	-0.0159	0.2107	-0.3487	0.0261	0.8732	0.1463	0.0483	-0.3088	0.0257	-0.0961	-0.221	0.1461	-0.1057	-0.3658	-0.0724	-0.2014	0.3427	0.033	0.3392	0.3364	-0.1054	0.3473	0.1002	-0.0343	-0.2138	0.3518	-0.055	-0.0258	-0.0492	-0.1095	-0.2334	-0.3499	0.3467	0.0288	0.0711	0.2186	-0.3136
P17301	ITGA2	Inflammation_II	0.3826	0.6486	0.6573	-0.0303	1.3131	-0.0245	0.691	-0.1392	0.1982	0.0397	0.2319	0.0571	-0.42	-0.7354	-0.4316	0.0644	0.2601	-0.816	-1.1765	-0.249	1.2628	-1.0431	0.0934	-0.641	0.8098	-0.7551	-0.0592	-0.314	1.3948	0.1516	0.3412	0.2822	-0.121	-0.1117	-0.0007	0.1651	0.5846	0.2781	0.0007	-0.4217	-0.3737	-0.5601	0.2604	-1.1403	-0.7476	-0.1188	-0.6529
P17405	SMPD1	Neurology	0.3379	0.5032	0.5101	-0.1664	0.2538	-1.1815	-0.5936	2.0386	0.0204	0.2333	-0.6928	0.5479	-0.0971	0.2291	-0.3297	0.287	0.2422	-1.2395	-0.4725	0.2739	0.0323	-1.115	-0.2096	-0.1273	0.952	-0.2875	-0.2915	0.2936	0.2898	-0.0335	-0.3793	0.2944	-0.8957	0.7601	0.0334	1.4658	0.9898	-1.5089	0.191	-0.8638	0.0959	-0.1601	0.0246	-0.8613	0.0157	0.1255	-0.8036
P17516	AKR1C4	Cardiometabolic	0.0642	0.8857	0.1085	-0.2374	0.324	0.718	0.1899	0.6211	-0.2877	0.0237	-0.7193	-0.8786	0.3346	-1.2526	1.4968	-0.4183	-1.1355	0.4778	1.2278	0.0866	-0.1411	0.3725	-0.0819	0.2686	0.3149	-0.7213	0.499	-0.1955	0.3936	-0.0621	1.2996	1.5	-0.5595	-0.1696	-0.5431	1.3305	-0.6671	0.2405	-0.0782	-0.7088	1.062	-0.4043	0.9806	0.8895	-0.3735	-0.106	1.3896
P17538	CTRB1	Neurology	-1.2355	-0.1129	-0.6763	-1.198	-0.1099	0.3305	0.6199	-1.1943	-0.8838	-0.0307	0.1038	-0.8708	0.1389	0.0792	-0.0089	1.1394	-0.8932	-0.4024	-0.6122	0.5323	-0.1893	-1.2577	1.4603	0.9802	0.6099	0.011	1.1022	-0.4072	0.1757	0.1492	-2.5305	-1.9945	-0.0197	-1.0702	1.2883	2.783	1.1542	0.3535	0.2712	-0.8795	-0.444	-0.228	-0.1325	0.9335	0.9402	-0.1324	0.0518
P17568	NDUFB7	Oncology_II	1.1582	0.5549	-0.135	-0.1949	0.1254	-0.2824	-0.1971	0.3286	0.1797	0.0505	-0.5025	-0.0339	0.2187	0.2049	-0.0949	0.1532	-0.2993	-0.4537	0.0604	-0.4294	-0.3172	0.2533	0.283	-0.2569	-0.1904	-0.2326	-0.3682	-0.1322	0.154	0.2548	-0.2047	-0.1403	0.076	0.0578	0.9294	0.2263	0.1605	2.7258	0.1048	0.4226	0.0098	-0.4462	-0.3693	-0.2547	0.519	-0.5777	-0.6307
P17643	TYRP1	Inflammation_II	1.0275	-0.3122	0.1413	-0.0012	0.513	-0.4118	-0.7833	0.3879	-0.818	0.2678	-0.0934	0.7272	0.2552	0.296	0.0869	1.1301	0.4152	-0.2614	0.872	-0.7112	0.0458	-0.4178	0.1178	-0.8011	0.0841	1.4379	1.2212	-0.7886	0.9434	3.4246	-0.4096	-0.0403	-0.3515	0.7885	0.9154	-0.4482	0.2889	-0.0305	0.2283	-0.0852	0.4862	0.8882	-0.9695	-0.8871	-0.1852	0.3038	-0.5131
P17676	CEBPB	Cardiometabolic	-0.3165	-0.2473	-0.0997	1.1252	0.3656	-0.5904	-0.2018	-0.2836	0.3971	-0.1079	0.1956	-0.3025	-0.2726	-0.5878	0.8754	-0.1005	0.0961	0.1823	1.6791	-0.2193	-0.8659	-0.01	0.4362	0.5102	-0.0003	0.6525	0.1557	0.3029	0.27	0.7002	0.0157	0.3079	0.1911	-0.2735	0.001	0.3716	0.7671	-0.5551	-0.2799	-0.2865	0.7468	-0.3993	0.2958	-0.5146	-0.0131	-0.5164	0.1343
P17813	ENG	Cardiometabolic	0.0076	0.4497	0.1459	-0.0807	0.5986	-0.2741	-0.0027	-0.1878	-0.0725	0.1432	-0.1889	0.4067	-0.1431	-0.0034	-0.2942	0.0569	-0.1042	-0.5899	0.0024	0.0918	-0.3056	0.1174	-0.1533	-0.344	0.1242	-0.2655	-0.2331	0.0463	0.5154	0.0217	0.1908	0.2987	0.035	0.0579	-0.342	0.4305	-0.0402	-0.3159	0.0637	-0.2467	-0.0258	-0.3806	0.1279	-0.2528	0.1981	0.1101	-0.0024
P17900	GM2A	Cardiometabolic_II	1.4523	0.1567	0.2533	-0.2071	0.2103	0.2036	-0.7617	-0.3227	-0.6543	-0.259	-0.3495	0.4328	0.2498	0.229	0.1172	-0.1347	-0.6677	-1.3437	0.6754	-0.6148	-0.2785	0.7488	-0.2934	0.7858	0.1179	2.305	0.2346	-0.0245	1.0237	4.2262	0.9354	0.1907	-0.4864	0.1244	0.0237	0.2878	1.0604	-0.4794	-0.2578	-0.4405	-0.1157	-0.173	-0.3135	-0.4456	0.9193	-0.1474	-0.3246
P17927	CR1	Inflammation_II	-0.4155	0.0454	0.0058	0.2942	-0.0322	-0.4512	-0.5507	-0.1323	0.0236	0.055	-0.2532	-0.0933	0.1696	-0.105	-0.2799	0.0934	0.1126	0.024	0.9337	-0.1126	-0.8144	0.8897	-0.1855	-1.1157	0.1672	0.7755	0.1274	-0.9427	0.9893	0.4185	0.4839	0.6626	-0.0935	0.449	0.1046	-0.0038	-0.2675	-0.6094	-0.0167	-0.8302	-0.6789	-0.6196	0.4714	0.2968	0.3558	-0.6288	-0.2072
P17931	LGALS3	Cardiometabolic	-1.1365	1.1045	-0.2391	-0.4114	-0.0763	0.2364	-0.3798	-0.2425	0.2206	-0.0161	-0.0371	0.5933	-0.4245	0.437	-0.3109	-0.7445	0.0378	-0.6836	1.8723	0.0048	-0.0555	0.197	0.0196	0.0634	1.3287	0.748	0.054	0.9106	0.8357	0.4681	0.3315	0.875	-0.3929	-0.6443	0.5794	-0.1981	0.7124	0.1657	-0.2242	-0.5809	0.3877	-0.3498	0.007	-0.3502	0.3646	0.0631	0.2772
P17936	IGFBP3	Cardiometabolic	-0.1036	0.4868	-0.1732	-0.8865	0.5773	0.0798	0.1114	-0.5049	0.587	0.1189	0.2417	-0.0182	-0.6421	0.0447	0.2067	0.3754	-1.0657	-0.4492	-1.71	0.4577	-0.0633	-1.5873	-0.0483	0.0721	0.263	-0.5182	-0.1883	0.1998	0.1027	0.0028	-0.046	-0.8826	-0.1905	-0.0404	-0.3096	0.6395	0.1266	0.3506	-0.3618	0.331	-0.3389	-0.2016	-1.3405	0.4685	0.1924	0.121	-0.5353
P17948	FLT1	Oncology	-0.2887	0.1946	0.3116	-0.2419	0.4702	-0.0288	-0.1856	0.092	-0.1709	-0.5001	-0.2804	0.5053	0.0641	0.5246	0.0018	-0.271	-0.0598	-0.4087	0.3665	-0.1741	-0.3037	0.4957	-0.0689	-0.365	0.0316	0.5555	0.4007	0.3984	0.9125	0.7488	0.2655	0.1106	0.1336	-0.1602	-0.5929	0.565	-0.2019	-0.2811	0.0178	-0.1645	0.0734	-0.0846	-0.0311	0.0845	0.271	-0.2156	-0.4563
P17980	PSMC3	Oncology_II	0.4614	0.1655	-0.3587	-0.9049	0.0833	0.1113	-0.7695	0.5374	-0.1733	2.4417	-0.7057	-1.2538	-0.1122	1.9674	-0.3396	-0.2523	0.0861	0.4968	0.4861	0.37	0.3172	-0.2421	-0.058	-1.5637	0.0064	-0.2316	-0.0878	0.3979	0.0607	-0.2231	0.3251	2.9013	0.4439	-1.0286	-0.245	0.2904	-0.268	0.0182	-0.4727	-0.244	-0.8229	0.5854	0.3068	0.3578	0.208	0.3919	-0.3055
P18031	PTPN1	Neurology	0.0935	-0.0275	-0.9841	-0.324	-0.087	-0.1434	-1.331	0.0146	-0.4158	-0.8482	-0.5063	-0.0658	0.6856	-0.2275	0.0433	-0.7806	-0.6633	-0.806	1.4235	-0.5997	-0.4849	1.5733	-1.0406	-0.5332	0.1236	0.9869	0.5296	0.2093	1.0863	1.5307	1.2879	-0.44	-1.2657	0.141	0.6924	1.4478	0.6831	1.888	-0.9449	-0.9093	0.4216	-0.6448	-0.395	-0.0146	1.685	-0.4286	-0.2325
P18065	IGFBP2	Cardiometabolic	-0.5454	-0.5294	0.5649	-0.9601	0.9134	-0.3193	-0.084	0.8797	-0.9649	0.5096	0.3323	1.3381	0.9859	0.8524	-0.6131	-0.1851	-0.6149	-1.1519	0.8134	-0.5777	-0.6735	1.0516	0.6681	-0.3421	0.2762	1.5258	-0.0613	1.3481	1.3269	1.3497	0.3381	1.2621	-1.4745	0.7796	-0.635	1.7829	-0.8234	-0.1803	-0.6576	-0.1085	0.6337	0.6546	0.1498	-0.0455	1.428	1.0355	-0.5642
P18084	ITGB5	Oncology	-0.0724	1.2414	0.5487	0.1491	0.6977	0.2759	0.2034	-0.1831	-0.5843	0.6872	-0.1006	0.3459	-0.6329	-0.2901	-0.2063	-0.2435	-0.2494	-0.3504	-0.5835	0.4527	0.0876	-0.3363	-0.4945	-0.4075	0.3778	-0.6404	-0.2371	-0.0372	0.9852	0.2997	-0.1008	0.176	-0.0465	-0.3341	0.5568	-0.5075	0.0635	0.8675	-0.0514	0.3714	-0.5507	-0.4576	-0.2461	-0.9536	-0.0916	-0.2182	-0.4303
P18428	LBP	Cardiometabolic	-2.32	-0.1064	-1.6252	-1.3432	-2.0316	-1.4926	-1.6969	1.5287	0.9208	-0.1522	0.3599	0.7756	1.6154	-0.7842	1.141	-0.3685	0.1544	0.1301	1.7319	0.6702	-1.5304	0.9699	0.1953	-0.0227	0.2383	0.1164	1.036	0.9925	0.7068	0.1929	0.3025	-0.7309	-1.2409	-2.0067	0.0349	0.5846	0.2115	-0.8879	0.1071	-1.1712	0.782	0.082	-0.3815	1.6443	2.5782	0.6535	0.1106
P18510	IL1RN	Inflammation	-1.2668	0.182	-0.4248	0.2151	-0.2936	-0.1866	-0.9815	0.248	-0.0859	0.3205	-0.3201	-0.475	0.0595	0.5626	0.089	-0.7901	-0.4949	-0.7613	2.5255	0.756	-0.6334	1.8469	-0.18	-0.6456	0.1003	1.1046	1.3138	0.4168	0.4098	0.8142	0.973	0.5896	-0.0952	-0.1905	0.0902	1.1229	2.353	-0.1392	0.1651	-1.4809	0.7061	0.1654	-0.4098	0.7028	1.7832	-0.6363	-0.2465
P18564	ITGB6	Inflammation	0.0093	-0.4411	0.1194	0.145	0.1926	0.1866	-0.2147	0.2069	0.279	-0.7366	-0.2677	0.5579	0.2347	-0.7271	-1.0278	0.0133	-0.1112	-0.2757	1.0397	-0.1635	0.799	1.3105	-0.6828	-0.4745	-0.0314	0.0368	0.1845	0.6185	0.5346	0.5245	-0.3005	-0.4072	0.0277	-0.5505	-0.8034	1.0124	-0.1475	-1.0802	0.166	-0.0844	-0.6868	-0.0764	-0.4246	-0.6297	1.8923	-0.0093	-0.1539
P18627	LAG3	Oncology	-0.8063	-0.6225	0.7436	0.4111	0.1679	0.4958	0.0357	-0.9839	0.1366	0.222	0.2765	-0.083	0.453	2.0571	-0.5169	0.0445	-0.2386	-0.3517	0.3846	-0.7965	-1.1885	1.27	-0.3557	-0.5467	0.8364	0.5397	-0.2198	0.0547	1.2842	0.6956	0.9355	-0.9701	-0.2047	0.3427	-0.1405	1.3879	0.5175	-0.4908	0.0637	0.2497	-0.4126	-0.1323	0.0018	-0.2706	0.6569	-0.0018	-0.4158
P18754	RCC1	Oncology_II	-0.3043	0.027	-0.2095	-0.2172	-0.0531	0.0942	0.021	0.0374	-0.5311	-0.0098	0.6805	-0.6068	-0.0402	-0.2317	0.1442	-0.5862	-0.2116	-0.5621	1.4716	-0.0858	-0.4425	2.1445	0.1443	0.1528	0.9859	0.0561	0.5007	0.5395	1.1199	0.4736	0.8218	0.1543	-0.3101	-0.3116	-0.5717	4.6831	0.1874	-0.6016	-0.1016	-0.4692	0.0472	0.1501	-0.0227	0.7298	1.8009	-0.2081	0.2588
P18827	SDC1	Cardiometabolic	-1.0418	-0.2103	-0.1866	-0.0035	0.3187	-0.1599	-0.881	2.0217	0.8508	-0.3383	0.4396	-0.4354	1.4381	0.6846	0.5152	-1.0193	-0.573	-0.8309	2.6147	0.0343	-0.1972	3.9437	0.2791	1.1188	1.0379	1.3457	1.1999	1.5438	2.4349	1.5123	2.8659	0.7977	-0.3754	-0.4301	-0.5883	4.4209	-0.5094	-1.135	-0.3228	-0.4133	0.0976	0.9473	1.7331	1.8674	1.9288	0.2683	0.0035
P18848	ATF4	Oncology_II	0.0822	-0.2493	-0.2903	-0.3192	0.3011	-0.3958	-0.8335	-0.4604	-0.1219	-0.3495	0.5607	0.0346	0.1016	-0.2615	-0.1709	0.1996	-0.5231	-0.0808	-0.009	0.1914	0.0598	0.9276	0.2065	-0.2146	-0.4994	0.8802	0.1494	-0.024	-0.2408	0.1527	0.7937	-0.1989	0.2551	-0.698	-0.0254	0.1015	0.5918	1.8388	-0.4073	-0.2677	-0.549	-0.2653	-0.4034	-0.1403	0.1119	-0.1065	-0.1599
P19021	PAM	Cardiometabolic	-0.52	0.7604	0.5223	-0.1749	0.5481	0.3025	-0.1741	-0.0847	0.1106	0.108	-0.2484	0.4037	0.0204	0.1793	-0.3315	0.0038	-0.4299	-0.7237	-0.0853	0.305	-0.0038	-0.2438	-0.0228	-0.5649	0.5485	0.2728	-0.0141	0.3124	0.8277	0.9443	-0.0212	0.006	-0.1867	-0.0954	0.0881	3.6257	0.5827	0.0174	-0.0285	-0.1345	-0.1903	-0.13	-0.0285	-0.0479	0.9086	0.2742	0.0922
P19022	CDH2	Cardiometabolic	-0.4889	0.3563	0.3148	0.1504	0.2789	-0.406	-0.6982	1.2246	-0.1858	0.5447	-0.2707	0.0132	0.0317	0.0187	-0.0965	-0.3835	-0.8099	-0.2561	0.2899	-0.0132	-1.5302	0.4848	-0.2627	-0.3075	0.5928	0.1504	0.4376	0.6554	0.7473	0.9704	0.5475	0.2316	-0.3822	-0.5586	-0.192	1.0735	0.1397	0.08	0.4077	-0.5946	0.0744	-0.022	0.3085	0.0848	0.9847	0.0369	0.2585
P19075	TSPAN8	Oncology_II	-0.2084	0.5626	1.0278	0.4416	-0.3115	1.8009	0.9873	0.644	-0.2051	2.5491	-2.122	-0.6676	-0.4256	0.1742	-0.2509	-0.144	-0.4802	-0.8773	-1.9433	-0.4261	0.8134	-0.2012	1.0892	0.6539	1.3961	0.702	0.852	0.3686	2.2708	0.4681	-1.2851	0.6113	-0.6298	0.8746	-1.7314	3.4664	-1.2664	-1.5523	0.3781	-0.1158	0.2095	-1.4767	1.3399	-1.6283	0.5873	-1.4123	-0.3046
P19256	CD58	Inflammation	0.1295	0.3734	-0.0773	-0.0007	0.4362	0.119	0.023	-0.1912	-0.507	0.1139	0.0007	0.2686	-0.0576	-0.0377	-0.3864	0.0267	0.0558	-0.2978	-0.0931	-0.2746	-0.2129	-0.011	-0.0515	-0.4341	0.4204	-0.1159	-0.1896	-0.1944	0.4217	0.4399	0.2304	0.4837	0.1624	-0.0513	-0.2672	0.6197	0.0624	-0.0295	-0.1007	0.0374	-0.077	-0.4565	0.1299	-0.2696	-0.0531	0.1305	-0.2289
P19320	VCAM1	Cardiometabolic	-0.2452	0.4137	0.3742	0.0527	0.5043	0.5147	-0.1773	0.4014	-0.4955	0.4716	-0.1889	0.4511	0.2301	0.0465	-0.2333	-0.133	-0.1886	-0.5012	0.1486	-0.0856	-0.4601	0.9372	0.3134	-0.7644	-0.0416	0.3455	-0.2633	-0.0718	0.6084	0.7715	-0.0397	0.6962	-0.2398	0.296	-0.1994	0.594	0.0221	-0.4958	0.0252	-0.2237	-0.4051	-0.1772	0.306	-0.0403	1.0294	0.6754	-0.4135
P19429	TNNI3	Cardiometabolic	0.7798	1.145	0.6996	0.6178	0.6187	0.2752	-0.9767	-1.484	0	-1.1983	-3.1541	-0.2604	0.2088	-3.2042	1.1483	-1.5301	-0.8394	-0.1642	-0.2125	1.4762	-4.652	0.8605	-0.3148	-2.1968	0.6875	-1.1847	-1.0975	-1.4544	1.0113	0.9902	-0.0352	-1.984	-0.4611	-1.1137	-0.8003	-0.0047	1.4873	-0.2901	1.0244	-1.2939	0.1346	-0.5824	-0.179	-0.2806	-2.1481	0.1769	-0.8153
P19438	TNFRSF1A	Neurology	-0.7947	-0.0508	0.0349	-0.0195	0.2933	0.2763	-0.0609	0.6156	-0.2372	-0.1449	0.216	0.6197	0.8071	0.4882	0.5127	-0.4349	-0.3515	-0.7414	1.496	-0.0961	-0.7365	1.481	0.2767	-0.8422	0.8837	1.8822	0.633	0.8052	1.0487	2.9967	0.3341	0.6803	-0.24	-0.0658	-0.4485	0.9906	0.4236	-0.5759	-0.2881	-0.5428	-0.2996	0.0583	-0.0484	0.6269	1.5541	0.0251	-0.2561
P19440	GGT1	Neurology	-0.4383	0.943	0.3161	0.1362	-0.1432	-0.9628	-0.4042	0.7717	0.1467	1.8951	-0.3553	-0.1158	-0.8879	0.0589	0.2368	-0.1327	0.0772	0.077	-0.2032	0.2816	-0.0326	-0.3834	1.3989	-0.8175	0.0345	-0.2465	0.6781	0.0982	0.7765	-0.2834	-0.5034	0.6862	-0.058	-0.4941	0.2441	1.7968	-0.111	0.5894	-0.0229	-0.3175	0.1966	-1.0159	0.7386	0.2607	0.52	-1.0336	0.5067
P19474	TRIM21	Inflammation	0.8415	-1.3968	0.3065	1.3247	0.3784	1.3433	-0.0063	-0.3477	-0.2318	-0.1927	-3.6064	-0.5274	-0.4796	-0.4576	0.3816	-0.0288	-0.0212	-0.5411	1.914	-0.0682	-0.1185	-0.5395	-1.7331	-0.3366	0.5387	-0.2407	-0.073	-0.7567	1.1659	1.3503	0.5218	-0.4382	0.272	-0.0576	-0.3572	2.2512	2.127	1.3683	-0.3406	-0.0219	0.9739	-0.1329	1.1734	-0.4128	0.1099	1.861	-0.8759
P19525	EIF2AK2	Oncology_II	1.6855	-0.2769	-1.2854	0.8471	0.3734	1.3183	0.7684	0.1594	-0.196	-1.1307	-0.7086	-0.1905	0.1757	-0.4105	-0.2055	-0.6116	-0.7575	-0.9767	0.888	0.0144	-0.8603	0.2016	-0.0524	0.5929	-0.4401	0.2989	-0.2799	-0.0439	0.8993	0.3964	4.5645	0.6458	0.0811	0.0843	1.4207	1.3781	0.4014	2.8994	-0.6822	-0.2523	1.4209	-0.8607	-0.0305	-0.6468	1.1685	0.3408	-0.4944
P19526	FUT1	Oncology_II	0.3821	-0.0291	1.0489	0.6856	0.1247	-0.413	0.9335	-1.5045	-0.1724	0.6044	-0.5358	-0.25	-0.1935	-0.1849	-0.3501	-1.036	-0.6785	-1.184	-1.1173	-0.8298	-0.9622	0.4318	-0.0148	-1.1185	0.066	0.0148	-0.7787	-0.0509	0.6249	0.458	0.1695	-0.8203	-0.59	-1.1026	0.6206	-1.0426	-0.1671	0.4661	1.2178	-0.5433	-0.7806	-0.5595	0.0256	1.6733	0.0576	-0.3118	-0.5849
P19801	AOC1	Inflammation	0.6908	0.0593	0.7142	0.4962	-0.4336	-0.6894	1.5806	-0.8395	0.8166	0.1498	-0.4066	-0.557	0.0565	-0.552	-0.0407	-1.0131	-0.3506	-0.1035	0.5882	-0.6248	1.6418	0.5234	0.0429	-1.1313	-0.5202	0.3562	0.443	5.6443	-0.4976	-0.4021	0.3941	1.3633	0.7498	0.1923	1.2674	1.4374	0.2044	-0.4698	-0.0349	-0.0872	0.0844	-1.1779	1.057	0.1631	0.2066	-0.418	0.0029
P19827	ITIH1	Inflammation_II	-0.0914	-0.0879	0.1188	0.1608	0.0489	-0.059	-0.0537	0.9672	0.0552	-0.151	-0.2555	-0.049	0.2069	0.229	-0.0178	-0.0901	-0.081	-0.0059	-0.2674	0.2245	0.2142	-0.1053	-0.0906	-0.145	0.0627	0.1566	0.0143	-0.0833	0.3892	0.0693	0.0392	-0.4002	-0.1902	-0.083	0.2059	0.2663	0.1785	0.0002	-0.0482	-0.4213	-0.1432	-0.1768	-0.1555	0.0776	0.2293	0.2733	-0.0873
P19838	NFKB1	Cardiometabolic_II	0.7562	-0.0098	-0.1891	0.9159	0.4533	0.1087	-1.4493	0.1127	0.0195	-0.3924	-0.6501	-0.4813	-0.0547	-0.213	0.8614	-0.479	-0.7231	-0.4017	0.6349	-0.6213	-0.5455	-0.3384	0.0098	0.2035	-0.719	-0.0329	-0.2126	0.8757	0.315	0.7932	1.5631	-0.3096	0.3303	0.8965	0.6113	1.0912	0.6259	1.8365	-0.7512	-0.7193	0.9197	-0.8827	0.4029	-0.5747	-0.1931	0.2121	-0.346
P19876	CXCL3	Inflammation	2.7116	3.1969	-0.9191	0.9998	1.7562	0.834	-1.4782	0.461	0.3717	-1.2961	-0.432	0.0372	-0.7556	-0.7148	-0.098	-3.115	-0.8954	-0.379	0.1439	-2.4315	2.5768	1.455	-1.3681	-0.3501	-0.4195	-0.9775	1.102	-0.5649	0.3489	-1.2651	-1.0753	-2.4568	1.2026	0.3663	1.8344	-1.3111	-1.3693	3.3465	-2.4517	3.2809	-0.1656	-2.8071	-0.1858	-1.3018	1.7395	-2.5286	-0.0372
P19878	NCF2	Inflammation	-1.001	-0.6642	-0.3602	-0.0046	0.0704	-0.2871	-1.9241	0.1219	0.5321	-0.5917	0.3121	0.3773	-0.096	0.2798	1.5064	-0.2511	0.0046	-0.2365	1.0885	0.2128	0.0227	0.0523	0.1769	0.6509	0.0305	0.5647	-0.0765	0.4427	0.1803	2.1041	2.9521	0.2269	-1.5971	-0.2091	-0.9605	1.2637	1.0744	-0.8987	-1.1697	-1.2338	2.3599	-0.9877	0.1501	-0.0462	0.1816	0.7835	0.4472
P19883	FST	Inflammation	-0.4229	0.649	-0.1786	-0.7167	-0.0081	-0.9806	-0.8317	-0.0197	0.0081	-0.4383	-0.0161	0.8903	0.5174	-0.0094	0.0682	0.0352	-0.2325	-0.4367	0.7944	-0.0975	1.2322	0.3271	-0.5841	0.2956	0.9415	0.1111	-0.0975	0.3388	0.9246	-0.0463	0.5081	-0.4206	-1.0172	-0.7681	0.1827	2.6265	0.0823	-0.7366	-0.4137	-1.5764	-0.333	-0.151	-0.4386	-0.3552	0.8677	0.645	-0.0543
P19957	PI3	Cardiometabolic	-0.1867	0.3317	0.1793	-0.7588	-0.3232	-0.9213	-0.3601	0.1357	0.2848	0.6681	0.1929	-0.3719	-0.0661	3.4755	0.0901	0.2057	0.012	-1.1129	1.2063	-0.1255	-0.4592	3.6584	0.3088	-0.8933	0.5892	2.4472	0.6373	0.9866	-0.058	2.5519	-0.1098	0.6147	0.4917	-0.3406	-0.5202	-0.4578	0.4074	-0.2913	-0.0061	-0.0181	-0.0775	-0.3998	-0.5902	0.7069	1.4833	0.2567	-0.2643
P19961	AMY2B	Cardiometabolic	-0.707	0.1841	-0.2674	0.1013	0.1422	0.0981	-0.2427	-0.907	-0.0402	-0.5541	0.1102	0.3369	2.8465	0.4071	-0.618	0.8538	-0.4438	0.1543	-1.0801	-0.2721	0.0051	-1.5849	0.5551	0.5563	0.4356	-0.3968	-0.4794	-0.6166	0.3218	0.2297	-0.5281	-2.3661	0.5296	-0.4912	0.6093	1.3225	0.3731	0.2498	0.2535	-0.4493	-0.5218	-0.5214	0.4335	-0.462	2.013	0.1117	-0.0298
P19971	TYMP	Cardiometabolic	0.4673	0.6378	-0.3946	0.1023	0.3678	0.6646	-1.0625	-0.0651	-0.434	-0.2006	-0.5178	0.0314	-0.73	-0.4776	-0.2667	-0.8157	-0.8008	-0.7981	0.7947	0.0749	-0.1916	0.411	0.017	-0.6856	0.1772	0.0005	0.354	0.0061	1.5552	-0.5709	0.8525	-0.1232	0.1524	-0.7918	-0.0338	1.8148	0.4841	0.6316	-0.4848	-0.9554	0.191	-0.9231	0.0395	-0.0005	1.3579	-0.4432	-0.1307
P20023	CR2	Cardiometabolic	-0.3202	0.8124	0.3052	0.1667	0.9299	-0.1997	-0.2568	-0.4298	0.2052	0.2734	0.0015	0.2501	0.0931	-0.0718	0.2279	0.4795	0.6446	0.3223	-0.1267	-0.3063	0.4917	-0.6421	-0.1486	-0.8842	0.0009	0.7471	-0.405	-1.24	0.2692	0.6984	-0.5618	1.1567	0.3875	0.2295	-0.7902	0.2538	0.1767	-0.2326	0.1825	-0.6268	-0.815	-1.9795	1.0183	0.1165	-1.3467	0.1652	1.2643
P20042	EIF2S2	Cardiometabolic_II	1.6288	-0.1987	-0.7071	0.5673	0.0113	1.8969	-1.3849	0.1196	0.3668	-0.0897	-0.6312	-0.3143	-0.4703	-0.7089	0.2631	-0.0329	-0.0484	-0.4737	3.7914	-0.4186	-0.7252	0.4317	-0.4528	0.1568	-0.2632	0.5493	-0.453	0.0149	0.4094	1.0494	0.5343	-0.5046	-0.4092	0.1924	0.7404	1.9286	1.371	2.8783	-0.3069	-0.445	0.8613	0.106	0.0896	-0.6433	0.625	0.0405	-0.7528
P20061	TCN1	Inflammation_II	0.1858	-0.1234	-0.2559	0.1086	-0.3428	-0.0462	-0.1586	0.103	0.4401	-0.0634	0.2735	0.1121	0.0968	0.4758	-0.7706	-0.1756	-0.3249	-0.1492	-0.639	0.4584	-0.0963	0.7217	-0.1802	0.1363	0.9008	-0.1076	-0.1817	-0.0616	0.3392	0.0012	-0.043	0.0849	0.1799	0.0952	-0.4675	-0.0714	0.4441	0.0466	0.1563	-0.5753	-0.3817	-0.2604	-0.383	0.155	-0.0863	-0.1549	-0.1151
P20062	TCN2	Cardiometabolic	-1.1561	0.6538	-0.2699	-0.1572	0.0594	0.1782	-0.0432	0.3889	0.2087	0.1861	0.4241	0.9646	0.3423	-0.1849	-0.0438	-0.51	-0.3706	-0.1758	0.7597	0.2417	-0.1669	0.4564	-0.0248	-0.45	0.4909	-0.1007	-0.3019	0.3443	0.4441	0.2417	0.1766	-0.2815	-0.3608	-0.2164	0.216	0.2225	0.2751	-0.4076	0.2925	-0.6639	-0.0352	-0.2893	-0.2897	0.3146	0.2347	0.0978	0.0481
P20138	CD33	Oncology	-0.4705	0.3169	0.8525	-1.6973	-1.4366	1.0581	0.5712	0.2757	-0.2026	0.7775	0.7472	-1.9719	1.0086	0.3497	0.3599	0.2643	0.4113	0.0879	0.3214	0.5216	-0.0413	0.5842	-1.0427	0.0042	0.1213	-1.8685	-0.8239	-1.3602	-0.3871	0.0356	0.5466	-1.1482	0.0127	0.9694	0.1095	-1.1013	0.6533	0.5968	0.3432	-1.0732	-0.5048	0.081	0.0452	-0.9679	-0.1433	0.7117	-1.4777
P20155	SPINK2	Inflammation_II	-0.6275	-0.4578	0.1578	0.2024	0.8097	0.0034	-0.1182	1.9392	0.1275	-0.0219	0.6636	0.2945	0.6779	0.0352	0.968	0.0236	0.2964	-0.1743	0.4295	-0.0877	-1.6941	1.3496	1.2678	-0.1056	1.4859	1.1025	0.5254	0.3406	0.2617	1.5146	-0.2949	1.1299	0.0769	0.1223	-0.6827	-0.0299	-0.0578	-0.3009	-0.2619	-1.1415	-0.2368	-0.4492	0.0256	1.0455	0.8997	0.7324	-0.2536
P20160	AZU1	Cardiometabolic	-0.0496	-0.0455	-0.1176	0.513	-0.1674	0.5558	-1.2584	-0.1398	-0.117	-0.8915	0.7283	-0.313	-0.2318	0.7453	0.6166	-1.0442	-0.1575	-0.1075	0.7532	0.201	-1.0106	0.2221	0.1563	0.0014	-0.9952	-0.0673	-0.1251	0.6371	-0.0107	1.1773	2.7389	0.3415	0.1845	-0.6249	-0.7573	1.3115	0.2347	0.1068	-0.6156	-0.3764	1.6051	0.7711	0.2214	0.2498	0.661	0.3825	0.6808
P20273	CD22	Inflammation	0.2599	0.1217	0.4489	0.1849	-0.0094	-0.8241	0.2496	0.4612	0.4342	-0.7952	0.1179	-0.1792	0.2987	0.0169	0.0694	0.1967	-0.4222	-0.1314	-0.089	0.1527	0.5941	-0.4793	-0.4651	-1.6275	-0.9646	-0.176	-0.0736	-0.9685	0.0686	0.0094	0.5437	-0.1338	0.3512	2.5545	-0.0515	0.4094	0.0126	-0.3588	0.5794	-0.0126	-0.0596	-1.0143	0.4106	0.5986	-0.4869	0.2074	0.6946
P20333	TNFRSF1B	Neurology	-0.9069	-0.1407	-0.0375	-0.1037	0.4015	0.5575	-0.3188	0.6388	-0.6694	-0.0505	0.0484	0.2611	0.4744	0.4248	0.0131	-0.2739	-0.1405	-0.7767	1.0591	-0.5173	-0.6576	1.0298	0.4501	-1.0607	0.7186	1.5965	0.5713	0.1445	1.1511	2.119	0.712	1.0424	-0.1589	0.5382	-0.1767	1.0417	0.5725	-0.6263	0.0634	-0.4873	-0.3897	-0.0544	-0.4921	0.1497	1.1344	0.1959	-0.5595
P20340	RAB6A	Inflammation	0.103	1.27	1.3798	-0.538	0.363	-0.4424	0.2762	-1.0344	0.8064	-0.5946	-0.3553	0.308	-0.2492	-0.1655	-0.9793	0.0627	0.2152	-0.6832	-0.1259	-0.1133	2.2507	-0.1398	-0.4057	-1.0851	0.2206	-0.3304	-0.0468	-0.937	0.3834	0.2765	0.2698	-0.2549	-0.4023	0.0727	-0.8375	2.3688	0.4574	-0.0162	-0.449	0.0986	-0.3228	-0.3657	-0.8779	-0.5232	-0.1184	0.2493	-0.0044
P20382	PMCH	Cardiometabolic_II	-0.1454	0.8193	-0.2749	-0.333	-0.0379	-0.0294	-0.1142	1.0871	0.181	-0.5098	1.2962	1.0849	0.8127	-0.3803	0.1183	-0.0351	-0.1452	-0.04	0.1011	-0.652	3.8247	-0.002	-0.3873	0.1765	-0.3807	0.2896	-0.1209	2.5911	0.002	0.5553	-0.8537	1.0024	-0.2218	0.3887	-0.3065	0.0529	-0.0808	-0.2833	-0.0202	-0.8986	0.2792	-0.2611	0.2287	-0.2438	0.8701	-0.2703	0.8891
P20472	PVALB	Oncology	2.3233	1.2282	0.3815	1.3994	0.9655	0.5403	-0.1165	-0.2823	-1.1972	-0.7721	-0.0668	0.9977	0.8734	-0.0604	-0.7444	-0.2313	-0.5707	-1.0325	0.5792	-0.59	-0.9333	0.6225	-1.0223	-0.2897	0.4729	1.1866	0.1054	-0.1507	-0.0775	1.7224	-0.7425	-0.7916	1.0794	0.754	1.8922	-0.2845	-0.157	2.8009	0.1466	0.547	0.038	-0.3454	0.1769	-0.1839	0.2206	-0.2617	-1.2141
P20645	M6PR	Cardiometabolic_II	-0.1312	1.599	-0.1241	-0.3371	0.899	-0.4839	-0.1107	0.0291	-0.0907	0.2856	-0.1954	0.0383	0.0935	-0.4008	-0.3819	-0.3021	-0.265	-0.243	0.3471	-0.1059	-0.1745	-0.2606	0.3746	-0.5156	-0.1201	-0.3141	-0.2805	0.7669	0.1585	0.1825	0.0935	0.1285	-0.2711	0.0474	0.3822	0.5824	0.2458	0.2552	-0.2964	0.0294	0.1573	-0.0777	0.018	-0.1492	0.0493	-0.302	-0.2917
P20700	LMNB1	Oncology_II	-1.2191	-0.3218	-0.1852	0.9714	0.0904	0.3729	-0.0005	-1.2141	-0.751	0.9838	-0.1886	-0.029	0.2376	-0.9102	0.5014	-0.5634	-0.2705	-0.8894	2.3165	-0.3785	0.07	1.0257	0.257	-0.3462	0.9355	1.0068	0.9342	0.541	1.0926	0.5809	1.0987	0.0005	-0.0421	-0.7997	-0.1373	2.6877	0.8375	-0.0453	-0.7979	-0.228	0.3428	0.3404	0.3685	1.2217	2.336	-0.302	-0.3971
P20701	ITGAL	Inflammation_II	-0.0969	-0.606	0.7967	0.3173	-0.1031	0.8174	-0.0183	-0.0032	-0.296	-0.6665	0.1965	-0.6952	-0.9087	-0.1917	-0.0506	0.4324	0.1203	-0.8813	-0.1106	-0.864	0.3316	-0.3777	0.3973	-1.6146	0.3328	-0.2931	0.0773	-0.0497	1.1339	-0.6305	0.4773	-0.2475	0.5224	1.8653	0.1372	-0.1824	0.2093	-0.0662	-0.4419	-2.9165	0.9107	-0.0934	-0.3427	-0.6086	-1.0696	-0.6301	0.1198
P20702	ITGAX	Oncology_II	-1.8113	1.8207	1.116	-0.0088	-0.2881	-0.6611	-0.33	-0.2007	1.0162	0.7517	0.587	-0.9539	-0.4923	0.1122	1.3433	-0.3737	-0.7097	0.3989	0.1869	1.4409	-0.5448	-0.6661	2.575	-0.2097	-1.9454	0.9797	0.0325	1.7426	0.7726	-1.2162	0.4638	-1.4138	-2.032	-1.0701	0.7999	-0.8268	2.2138	-0.6469	-0.187	0.0088	0.9808	-0.228	-1.8178	1.6861	0.4024	1.1715	1.1963
P20711	DDC	Cardiometabolic	0.0026	1.382	0.8419	0.9521	0.5462	-0.2448	0.2023	-1.7331	-0.563	0.6009	1.01	0.1824	-1.6878	-1.7912	0.009	1.17	-0.6299	-0.583	-3.0951	-0.3246	0.1208	-1.4608	-1.2918	0.1096	1.0047	-0.8114	-0.2532	-1.2729	0.5773	0.6392	-0.7113	1.8464	-0.1043	-0.0026	0.3636	4.2574	0.2562	-0.4683	-0.6272	0.1132	0.2917	-1.9438	-0.1095	-0.9742	-1.6263	1.0584	-0.1843
P20718	GZMH	Cardiometabolic	-0.8623	-0.2282	0.5301	0.6344	-1.1872	0.0861	-0.7848	0.1778	0.2636	-0.6873	-0.6493	0.0108	0.4074	0.5391	-0.1491	0.2107	-0.6627	-0.9165	1.276	0.278	-0.7387	2.2041	-0.4065	-0.533	0.8869	0.4297	0.0994	0.6394	1.8945	0.2457	1.7586	-0.7915	-0.7249	0.9914	0.7644	0.9738	1.4369	-1.4182	-0.3938	-0.5331	0.6477	-0.3884	-1.1329	-0.3955	0.2597	-0.256	-1.3975
P20742	PZP	Inflammation_II	-1.8672	-1.3383	1.2323	-0.752	0.0055	-2.673	1.9568	0.2211	-1.079	-0.2963	-0.4327	-1.4526	1.4459	2.3283	0.6298	1.3875	0.1469	-0.4941	1.3318	1.8206	0.5372	1.3912	-1.2815	-0.0884	1.1186	-0.7552	-0.0342	1.7984	-0.4034	0.1191	1.4248	-1.9316	-2.5689	-1.91	0.5038	1.3527	0.7616	0.6047	0.4358	-1.7479	-0.0336	1.7139	-2.2286	0.5936	1.2545	-0.0055	2.5569
P20774	OGN	Neurology	-1.1083	0.1868	0.6166	0.0324	-0.2021	0.2804	0.1771	0.3464	-1.449	0.2136	0.1317	0.3364	0.1592	1.1358	0.0749	0.1449	-0.6455	-1.5672	-0.2588	-0.2226	-0.5174	-0.2836	-0.8693	-1.3156	0.6583	2.7548	0.6889	0.1863	1.0939	3.4646	0.8317	-0.382	-0.5791	-0.2039	0.0677	-0.1633	0.4314	-0.833	-0.1287	-0.6274	-0.5133	-0.0716	-0.5313	0.0506	1.3489	0.5315	-0.7476
P20783	NTF3	Inflammation	-0.3816	1.1661	0.0096	-0.6118	0.6887	-1.4122	-0.833	-0.282	-0.5636	-0.9708	0.3976	0.972	-0.8118	-0.3071	0.2954	-0.5412	0.0461	-0.3197	0.1212	0.605	0.1217	-0.3315	-0.1205	0.3682	0.8797	0.0568	-0.4538	0.5258	0.8708	0.5404	-0.2935	-0.3767	-0.8271	-0.5378	0.2317	0.2939	0.4559	0.6828	-0.191	-0.9393	-0.0516	-1.4788	-1.0058	0.2526	0.0926	0.2987	-0.5758
P20807	CAPN3	Oncology_II	-0.2309	1.2174	0.1721	-0.4605	0.811	0.0255	-0.5259	0.0119	-0.4603	0.475	-0.4276	-0.356	-0.4173	0.1807	0.291	0.4226	-0.3285	0.213	0.985	0.595	-0.0716	-0.839	-0.0092	-0.1155	0.922	-0.6704	-0.4891	0.0785	-0.3953	-0.3429	0.4632	-0.2675	-0.3814	-0.0856	0.6738	0.1078	-0.2356	-0.3781	-0.4716	-0.2561	0.0284	-0.4692	-0.0081	0.0103	-0.7096	0.1261	-0.0261
P20809	IL11	Inflammation	0.3858	0.168	0.0936	2.7478	-0.3667	-0.3159	-0.2004	-0.109	0.6564	-0.197	-1.704	0.3297	0.0364	-0.2743	0.4676	0.1157	-0.051	-0.7328	1.5809	0.8693	-0.2269	2.3355	2.0508	0.709	0.0019	-0.0198	-0.0286	2.3423	1.6948	-0.9078	-1.2869	0.4953	0.0322	-1.1576	-0.6135	2.1491	-0.0668	0.4797	-0.3278	-0.3194	-0.1992	0.8051	0.8829	0.5505	0.8064	-0.0057	1.1373
P20823	HNF1A	Neurology_II	0.0617	-0.0698	-0.1397	-0.647	0.7045	0.4153	-0.2824	0.5114	-0.4031	-0.6958	2.1099	-1.4889	-1.9336	0.3816	3.4231	-0.0212	0.3848	1.1604	0.2573	-0.6146	1.0799	-0.1907	-0.4863	0.7116	1.1662	4.9707	0.0212	-0.6295	-0.2886	-0.0603	1.6408	0.8201	-0.636	0.043	0.4475	0.9169	0.508	1.6528	-0.0822	0.9293	-1.9126	-0.3009	0.8206	2.8369	1.375	-0.7836	1.2564
P20849	COL9A1	Inflammation	0.9183	1.7663	0.3411	-0.6822	1.478	-0.19	0.5648	-0.0397	-0.7915	0.0125	-0.1363	-0.0753	0.0914	1.1197	-1.3694	0.2887	0.0307	-0.4449	-0.4658	0.4898	-1.1417	-0.7454	-1.1253	-0.8451	0.0995	2.5716	-1.2243	1.8014	-0.0052	2.0808	0.0126	-0.3305	0.2948	-0.1549	-0.938	1.1263	0.6937	0.7045	0.0209	0.0425	0.978	-1.0626	0.0063	-0.4488	0.4829	-0.1928	0.2661
P20851	C4BPB	Oncology	-0.6795	-0.8632	-0.717	-0.2316	-0.3374	-0.3005	-0.3942	1.7145	0.4855	0.4108	0.0713	-0.1405	0.6909	0.4961	-0.1398	0.4247	-0.2205	0.0547	1.1068	-0.1311	-1.2555	0.0031	0.1815	0.404	0.4406	0.0636	0.7764	1.4	0.0636	0.6574	0.5906	0.5284	-0.6728	-1.054	0.3748	0.7253	-0.5191	-0.4035	0.3239	-0.9675	0.3251	-0.0031	-0.7716	0.1977	0.7644	-0.6343	0.5257
P20908	COL5A1	Inflammation_II	-0.0149	0.1418	0.9175	-0.1417	0.8996	-0.2465	0.1465	1.3888	0.2635	2.2598	-0.3915	-0.319	-0.2017	-0.3563	-0.4291	0.4906	-0.3658	-0.8265	-0.231	-0.3145	-0.6865	-0.1687	0.8576	0.0172	-0.7635	0.6805	0.0149	0.8477	0.9877	0.6336	-0.4634	-1.819	-0.374	-0.6306	-0.2308	2.9233	0.2152	0.1541	0.791	-0.2404	-0.1224	-0.3554	0.2822	-0.8157	1.8506	0.319	0.3233
P20916	MAG	Neurology_II	-0.7699	0.082	0.0731	0.2463	-0.5438	0.1812	-0.0932	0	-0.2562	0.1914	-0.4796	0.3528	-0.0964	-0.7431	-0.0315	-0.7101	-0.1275	0.1758	0.4184	-0.2236	0.4771	-0.263	-0.6184	0.359	0.2949	0.1437	-0.1388	0.1661	-0.0005	0.1985	-0.0593	0.4042	-0.2601	0.1721	-0.9112	0.0334	-0.1573	0.1108	-0.6432	0.0378	0.2097	0.0681	0.0665	0.1971	-0.3492	-0.2163	0.4167
P20929	NEB	Cardiometabolic_II	-0.2253	0.8967	-0.1806	-0.298	0.4741	-0.1286	-0.0967	0.7058	-0.4728	-0.2436	-0.6077	-0.4156	-0.7965	-0.5234	-0.1942	0.2928	-0.1924	0.8291	0.5964	-0.0479	-0.4243	-0.1857	0.0635	0.0015	0.4461	0.2939	-0.4403	-0.0385	0.2029	1.3894	-0.3906	0.6185	-0.3327	0.2054	-0.3584	1.0375	0.5266	-0.1551	-0.0387	-0.696	-0.2911	-0.5948	0.5818	0.6896	-0.5019	-0.4874	-0.4197
P20936	RASA1	Neurology	-0.7681	-0.2175	0.113	0.1281	-0.1418	0.0529	-0.8035	-0.5975	0.2545	0.7668	0.0768	-0.1938	-0.2326	0.0471	-0.312	0.3128	-0.2914	0.3726	-0.1528	-0.4367	0.3989	0.6435	-0.724	2.1155	0.6096	-0.4518	-0.3662	0.3973	0.0621	-0.9914	-0.2148	-0.3251	-0.32	0.1278	0.1872	0.0025	0.6021	-0.1666	0.041	-0.8568	-0.3398	-0.4414	0.569	-0.6251	0.1044	0.4268	0.1272
P21128	ENDOU	Oncology_II	0.4846	-1.0387	0.7186	0.0446	-0.1081	0.3147	0.2214	-0.4447	-0.3794	0.1741	0.5526	1.2854	0.2729	-0.0864	0.3261	0.6084	-0.3135	-0.3282	-1.9694	-0.7377	-0.8546	-1.3441	0.2123	-0.0048	1.1701	2.3027	0.8095	-1.0142	1.3005	1.3498	-1.2627	0.3121	1.0667	0.0049	-0.7145	-0.2441	0.4462	-0.0323	-1.2783	-0.3923	-0.2388	0.0048	-0.5511	0.7483	1.5222	0.5964	-0.5331
P21217_Q11128	FUT3_FUT5	Neurology	-0.7549	-0.2375	0.6115	-0.139	-0.1676	-0.5089	-0.7444	0.7021	-1.8571	-0.0616	0.9329	1.5968	0.9022	-0.1086	0.799	0.7138	-0.6465	0.5746	1.0594	0.4968	-0.5594	0.8255	0.0396	-0.4007	-1.4105	-0.2818	-0.3709	1.1305	0.6553	0.4316	-1.1732	-0.7167	-0.4923	0.2585	1.0935	2.0608	0.4338	-1.6476	0.3313	-0.5631	0.1899	0.3548	0.8137	0.8324	2.6993	0.043	-0.7866
P21246	PTN	Cardiometabolic	-0.6435	0.8846	0.7477	0.7407	0.6088	-0.0228	0.619	0.0042	0.1934	1.4354	-0.2047	1.7529	-0.4429	0.0477	-0.1791	-1.2016	-1.086	0.4282	0.2197	-0.3538	0.1696	-0.7707	0.141	-0.7455	0.7184	-0.1963	-0.0722	1.7457	1.5439	-0.6935	-0.4198	-1.7198	-0.1413	-0.373	0.6411	1.009	0.1906	-0.1461	0.6344	-0.4079	-0.4917	0.0544	-0.5133	-0.8631	1.1801	-0.3048	-1.3213
P21549	AGXT	Cardiometabolic	-0.223	1.1235	0.8253	0.6025	-0.0547	0.4539	-0.0093	0.5828	-0.2798	2.2124	0.2653	-0.7626	-0.5455	-0.1527	0.5938	-0.2177	-0.1777	0.2039	-0.9028	-0.3571	0.7587	-0.621	-1.0455	-0.3802	0.6218	-0.5296	0.6078	-1.0697	0.7189	0.7355	-0.0603	1.1646	-0.047	-0.6422	-0.0853	0.6894	-0.1306	0.9463	0.0943	-0.2185	-0.2975	-0.3222	1.2764	0.5592	0.6898	-0.9141	1.4107
P21579	SYT1	Neurology_II	-0.678	-0.4558	0.1956	0.3917	-0.1035	0.12	0.0541	-0.3679	-0.0013	-0.7559	0.0864	0.4395	-0.1533	-0.274	-0.2024	-0.4056	0.5398	-0.8551	0.9921	-0.1617	0.2201	1.1745	-0.2646	0.0485	-0.0744	1.0681	0.1152	0.2115	0.5126	2.034	-0.0867	0.8728	-0.2398	0.5349	-0.1853	3.035	-0.1047	-0.2832	0.1882	-0.2601	-0.016	0.0115	0.1159	-0.5177	0.6865	-0.2351	-0.8732
P21583	KITLG	Cardiometabolic	0.1839	-0.1936	0.3685	0.1957	0.607	0.059	0.6522	-0.7861	-0.4489	-0.2248	-0.0895	0.6718	-0.5694	-0.1642	-0.517	-0.1476	-0.1813	-0.5706	-1.2629	-0.0537	-0.4141	-1.6055	0.2708	0.323	0.9607	0.7855	-0.2256	-0.5703	1.3014	1.2263	0.3785	-0.6645	0.383	-0.2119	-0.6408	0.0368	0.6484	0.5595	-0.2996	0.4308	-0.5494	-0.103	-0.5205	-0.4148	0.0614	0.2633	-0.4328
P21589	NT5E	Oncology	0.237	0.8798	0.352	-0.3768	-0.2284	-0.6023	-0.2425	0.4146	0.0242	2.6141	-0.3733	0.0636	0.1779	-0.6581	-0.0235	-0.3227	-0.2989	0.0998	-1.4544	0.4408	0.518	0.6401	2.9652	-0.6066	0.5277	-0.7027	0.1455	1.4193	0.8077	-0.4022	0.6927	-0.9786	-0.8993	-0.5516	-0.2694	1.4137	0.096	1.4657	0.1331	-0.7929	-1.4239	-0.3308	0.3852	-0.5228	0.4085	-0.6547	0.6166
P21673	SAT1	Cardiometabolic_II	0.5123	0.3355	-0.425	0.0702	0.2546	-0.8419	0.0114	-0.7959	-0.3598	-0.5524	0.1837	-1.1672	-0.7545	-0.2818	-0.1247	-0.5219	0.4232	-0.0488	0.714	0.7229	1.1417	-0.2283	0.163	0.0476	0.2244	-0.486	-0.4751	1.8189	-0.3186	0.8887	-0.2357	4.2424	0.2998	-0.0114	0.2128	0.0899	-0.0454	-0.0458	0.2851	-0.6478	2.078	-0.0631	0.328	-0.411	0.6378	-0.2696	-0.0937
P21695	GPD1	Oncology_II	-0.3003	1.2702	0.6676	0.2189	-0.4289	0.1635	-0.0385	-0.6563	-0.1657	-0.1219	-0.7236	-0.2585	-1.5017	-0.0109	-0.0481	0.0786	-0.0608	-0.3049	0.6976	0.6579	1.4379	-1.9196	-0.9243	-0.8752	0.7304	0.2484	0.8276	-0.3417	0.4037	1.8234	0.4002	1.787	0.3704	-0.4969	0.0109	0.2978	1.851	-0.7629	0.0851	-1.2097	0.8431	-0.7265	0.5899	-0.1912	-0.6989	-1.154	-0.0187
P21709	EPHA1	Inflammation	0.0031	0.1983	-0.2049	-0.1225	0.6158	0.3393	0.6037	0.4744	-0.8312	-0.1367	-0.0031	-0.2069	-0.2395	0.0386	-0.0713	-0.235	-0.2958	-0.7649	-0.7443	-0.3428	-0.5418	-0.0277	0.1822	-0.2693	0.4416	0.5906	-0.2994	-0.1287	0.5481	1.1829	0.1836	0.1692	0.5776	0.2213	-0.3124	0.0824	-0.2405	-0.1137	0.018	0.0725	-0.3966	0.1519	0.305	-0.2075	0.211	0.0419	-0.5291
P21741	MDK	Oncology	-0.3558	1.15	-0.3164	-0.2715	-0.2281	0.137	-0.3197	0.3349	-0.0676	0.2352	0.1789	1.6443	0.5272	1.3145	-0.185	-0.0152	-0.362	-0.8069	1.4802	-0.4226	-0.2267	1.8681	-0.4462	-0.6305	0.6448	1.0853	0.4162	0.9039	0.8097	1.3588	-0.3129	-0.1164	-0.7119	-0.4917	0.9703	4.203	0.5566	-0.1926	-0.2476	-0.8148	0.1567	-0.0798	-0.4568	-0.3976	2.4255	0.3924	-0.4407
P21754	ZP3	Cardiometabolic_II	1.0632	0.1266	0.0469	-4.2406	1.621	2.9891	0.6267	-0.921	0.376	0.7188	-4.6153	0.3414	-4.6773	1.4346	-0.9418	-0.1142	1.2075	-0.4787	0.5334	-5.4286	1.574	-0.6566	0.8236	-0.1471	0.0292	-4.8857	-0.1973	-1.0537	-4.5627	1.6915	-4.898	-1.9736	-0.2118	3.8089	2.5402	-3.7193	1.8387	0.5668	1.4188	-1.2602	-5.1233	3.2526	1.2075	-0.9481	-0.4472	-3.2416	0.6152
P21757	MSR1	Neurology	-0.5188	0.0664	0.7378	0.3583	-0.0083	-0.0173	-0.4561	0.0473	0.3936	0.4647	-0.4912	0.1476	-0.168	1.1605	-0.3623	-0.4292	0.101	-0.968	0.2431	0.1289	-0.0106	0.5588	-0.4635	-0.7256	0.9614	0.9746	0.449	0.4324	1.0447	0.7486	0.3516	0.6012	-0.1251	-0.3498	0.4202	0.9867	1.3575	-0.9048	0.4598	-0.4578	-0.6757	-0.6264	-0.1008	-0.188	0.5256	-0.1233	-1.0162
P21781	FGF7	Oncology_II	0.2163	-0.2399	1.0093	-0.3526	0.1656	-0.3592	-0.3436	2.4795	-0.9503	0.2279	-0.4528	0.0673	-1.2083	0.1409	-0.3812	0.1147	0.6786	-0.5007	2.1501	-0.2165	0.382	-0.1014	-0.7696	0.6178	0.185	-0.3949	0.3371	0.2876	0.0471	-0.1691	0.0561	0.0836	-0.6571	-0.8168	0.1298	0.3832	-0.0716	-0.311	0.913	-0.1967	-0.4819	-0.2944	-0.7353	-0.0736	0.6941	-0.3678	-0.8866
P21802	FGFR2	Oncology	0.2481	0.3979	0.1344	0.2013	0.3046	0.4249	-0.1467	0.3599	-0.1609	0.3654	0.0655	0.224	-0.2251	-0.199	-0.1611	-0.3548	-0.4469	-0.4025	-0.1244	-0.179	-0.1548	-0.0117	-0.0753	-0.4243	0.1244	0.3494	0.5171	-0.1355	0.4847	1.4076	0.5722	0.3169	-0.1209	-0.0187	-0.0754	0.6289	0.1747	-0.181	0.1721	-0.3648	-0.0205	-0.1487	0.3364	-0.182	0.3547	0.0117	-0.4427
P21810	BGN	Oncology	-0.5351	0.3079	0.2911	0.2769	0.2848	0.2115	0.0093	-0.4837	-0.3517	0.6609	-0.9182	0.1633	-0.6573	-0.6266	-0.6184	-0.4078	0.079	-0.4393	0.3593	-0.4322	-0.6556	-0.3494	0.3656	-0.3113	-0.1593	0.5598	-0.1309	0.3376	1.4054	1.3078	-0.2451	-0.8851	0.3435	-0.6335	-0.0911	1.7807	0.2264	-0.0199	0.3503	-0.7039	-0.4718	-0.4562	-0.6822	0.1487	0.2659	-0.2996	-0.3327
P21817	RYR1	Cardiometabolic_II	0.531	0.7949	0.0131	-0.3294	-0.2507	-0.1786	0.3429	-0.1188	-0.0703	-0.1528	-0.0203	0.0523	-0.0016	0.2543	0.4392	0.5413	-0.3034	-0.255	0.089	-0.1907	-0.338	-0.1924	2.7946	-0.6876	0.5615	0.3689	-0.4772	-0.1275	0.0888	-0.4175	-0.0278	0.3166	0.4067	-0.2782	0.0582	1.3639	0.4096	0.2385	2.0144	-1.6987	-0.0158	-0.2104	-0.6289	0.3151	0.4902	-0.6831	0.0527
P21854	CD72	Inflammation_II	-0.6713	-0.5522	0.0182	-0.5038	0.5934	-0.1088	-0.6002	1.3828	-0.2286	0.3531	0.0596	-0.4649	0.3513	0.033	0.9267	0.0751	-0.7018	-0.6102	0.2628	-0.0061	-0.0729	0.3033	0.7386	-1.0694	0.1453	1.1025	0.535	-0.0246	0.3666	0.7203	0.5548	-0.4697	-0.081	1.9196	-0.0643	0.8883	0.5847	-0.8097	-0.2627	-0.7336	-0.3236	-0.3626	0.1487	0.3169	0.9763	0.275	0.1758
P21860	ERBB3	Inflammation	-0.2606	0.5397	-0.2316	-0.2571	0.4106	-0.3904	0.0788	0.3531	0.0779	0.0915	0.1807	0.2032	-0.4535	0.2942	-0.363	-0.2493	0.4657	-0.1957	0.1119	0.1408	0.2216	-0.5303	-0.1252	-0.187	0.1189	-0.5021	-0.0138	0.0513	0.2452	0.0625	0.0081	0.4755	-0.0729	-0.1838	-0.142	0.4509	-0.0393	0.1622	0.1198	-0.2505	-0.3281	-0.3399	-0.0062	-0.0023	0.2911	0.0023	0.181
P21912	SDHB	Oncology_II	0.2367	0.7392	-0.2127	-0.1318	0.1295	-0.314	-0.0442	-0.3612	0.2518	2.8472	-0.0024	-0.2526	-0.6738	-0.3761	0.3104	-0.1349	-0.4368	0.1452	-0.1356	0.0971	2.1393	-0.2117	2.1462	0.1736	0.2533	-0.5232	1.4243	0.0024	0.2124	-0.3097	-0.0222	0.4566	-0.4284	0.0382	-0.501	3.3998	0.027	1.5502	-0.2852	-0.3622	-0.1799	-0.2345	0.6584	0.2626	0.1511	-0.6272	0.62
P21964	COMT	Cardiometabolic	0.7802	-0.0379	0.0925	1.2686	-0.1586	1.1807	-1.4069	-0.0198	-0.1965	0.0441	-0.3972	-0.2767	-1.0667	-0.4695	0.1518	-0.26	-0.5415	-1.1485	1.7657	-0.057	-1.3934	0.4833	-0.4768	-0.1379	-0.2233	0.7018	-0.0899	0.2393	0.8406	1.1056	0.3391	-0.7436	-0.3062	0.1733	0.8268	1.8124	0.9348	1.824	-1.0061	-0.5357	0.9185	-1.4175	-0.3473	-0.2882	0.1914	0.1163	-0.6119
P21980	TGM2	Cardiometabolic	-0.4554	1.4204	-0.2486	-0.0654	-1.3142	0.9026	-1.6094	1.7843	0.8897	-0.4628	0.132	0.3747	-2.029	0.5687	1.3763	0.6882	1.151	-0.1908	1.8591	1.309	-0.1591	-1.4294	0.9342	0.6942	1.1253	0.7195	-0.5922	0.5926	0.6887	1.8581	1.0656	-0.4924	-1.1212	-0.5362	-0.3222	0.7698	1.7188	0.5389	-1.0215	-2.7907	1.5348	0.4311	0.9085	-0.6564	-0.0705	1.5538	-0.9057
P22033	MMUT	Cardiometabolic_II	0.5043	-1.0673	0.8818	-0.1748	-0.0006	1.3008	-0.4869	0.0864	-0.2327	1.4216	0.3073	-1.1787	0.0006	-0.9486	-0.6717	-0.5343	-0.1425	0.6619	0.5689	-0.7634	-0.6929	0.0918	-0.1853	-0.446	0.7389	-0.0338	0.2878	-0.2063	0.3244	-0.2229	0.5926	0.9557	-0.0114	-0.8577	0.4519	2.6464	0.0113	2.4414	-0.3224	-1.0709	-0.1567	-0.4805	0.6254	-0.7138	-0.6144	0.2563	-0.2091
P22079	LPO	Neurology	-0.6338	-0.2433	1.1928	0.6607	-0.1721	-1.4458	0.1932	-1.1439	1.9109	-0.0237	-0.259	0.3226	-0.3243	0.1967	-1.0668	-1.0184	-0.8017	-0.3634	-1.2856	0.3738	-0.3419	-0.8563	-0.8086	-0.1527	0.8132	-0.5372	0.5672	0.6099	0.6213	-0.1751	-0.059	1.6348	0.0203	-0.9764	-0.3091	-0.25	-0.0129	0.4511	1.3027	-0.3803	-1.2401	-0.0979	-0.8485	-0.3201	0.6783	0.2943	0.255
P22102	GART	Neurology_II	-0.2683	0.332	-0.2438	-0.2006	-0.0663	-0.1072	-0.035	0.333	0.1883	0.1434	0.4354	-0.2792	-0.0571	-0.3697	0.5964	0.1861	-0.0861	0.187	1.051	-0.0729	0.0752	-0.0768	0.7087	-0.3737	0.1381	-0.1748	-0.0078	0.3528	0.4904	-0.0841	0.5055	2.1165	0.2469	-0.5073	-0.2726	0.554	0.0844	-0.2758	0.0558	-0.7772	0.0456	0.1469	-0.3293	0.3833	0.3108	0.1215	0.0411
P22105	TNXB	Neurology	-0.0407	0.769	-0.2796	-0.0126	0.612	-0.1115	0.1103	-0.6043	0.3469	0.2933	0.0046	0.1344	-0.3333	0.3632	-0.2838	0.2567	0.2088	-0.5644	-0.3089	0.3904	-0.0244	-0.8947	-0.4897	-0.5072	0.2801	-0.6555	-0.2249	-0.2105	0.6357	0.0986	-0.4674	0.0598	-0.0848	-0.1271	-0.2315	0.1561	0.189	-0.2487	0.119	-0.0046	-0.2032	-0.3763	-0.1867	0.1951	0.0631	0.2396	0.4946
P22223	CDH3	Neurology	-0.7737	-0.28	0.0496	-0.323	0.2843	0.3881	-0.4004	0.7619	-0.5657	-0.2325	-0.0621	0.4827	0.7187	0.0077	0.0642	0.0674	-0.1694	-0.8957	2.6267	-0.1982	-0.0125	2.5144	0.0972	-0.8237	0.4387	1.5807	0.4971	1.5797	1.751	1.6796	-0.1039	0.3488	0.0255	0.6373	-0.4161	0.6551	0.2924	-0.6614	-0.4978	-0.9546	-0.5933	0.4707	-0.5813	0.4453	3.4904	0.1691	-0.0467
P22301	IL10	Inflammation	-1.8874	-0.1144	-0.1747	-0.1316	0.2006	-0.4784	-0.5664	-0.5606	-0.1586	0.5713	-0.2702	0.5866	0.3726	0.0935	-0.0589	-0.5841	-0.6515	0.4775	1.0023	0.7573	-1.1519	-0.0538	0.3891	-0.1243	0.8116	0.2045	-0.0149	0.5791	-0.3264	0.9068	0.4086	2.4585	0.9187	1.634	-0.266	0.9395	-0.2586	0.8065	-0.2909	0.3103	-0.475	-0.718	0.1149	0.476	-0.2594	-0.0494	0.6683
P22303	ACHE	Inflammation_II	0.2594	0.2857	0.3778	0.3259	0.738	0.399	-0.019	-0.0069	-0.3625	0.0154	-0.5019	-0.372	-0.9427	-0.1739	-0.0053	0.0053	0.0405	-0.7895	0.3424	-0.0273	-0.2899	-0.7279	0.2905	-0.8053	-0.1171	-0.705	-0.9324	-0.5977	0.6017	0.0236	0.399	-0.5603	-0.4081	-0.6012	-0.553	-0.2479	0.452	0.2065	0.2705	-0.0717	0.0412	-0.7326	0.9848	-0.4097	-0.6226	0.2925	-0.8736
P22304	IDS	Inflammation	0.0567	0.021	-0.0011	-0.0221	-0.0347	0.0193	0.327	0.002	0.0328	-0.0021	0.0141	0.0672	-0.0085	0.1695	-0.0867	0.0876	-0.0197	-0.1482	-0.1551	0.1131	-0.1383	-0.1065	-0.3092	0.1084	-0.0726	-0.4136	0.0178	0.0453	-0.0502	-0.1092	-0.05	-0.1799	0.1334	0.0774	-0.1342	-0.4632	0.011	0.0495	0.0021	0.0818	0.0154	-0.01	0.1318	-0.1395	0.0238	0.0913	-0.107
P22307	SCP2	Oncology	0.4364	-0.1887	1.3947	1.221	1.0415	0.4521	0.458	-0.7222	-0.4724	-0.1446	0.2424	-0.8112	0.2037	-0.2679	-0.0827	-0.1749	-0.6047	-0.1477	1.722	-0.4769	2.4796	0.5063	0.4456	-0.8727	0.1951	-0.2523	0.6997	-0.0551	0.3615	-0.6521	0.2828	1.9475	2.8902	-0.3006	-0.052	0.0394	-0.3569	0.7522	1.2022	-0.9076	-0.2045	-0.1211	1.151	0.0159	-0.47	-0.0013	0.4103
P22455	FGFR4	Inflammation_II	-0.6066	-0.9874	-0.4857	0.547	2.0815	0.8367	-0.3351	1.7916	-0.8261	1.1059	0.1033	-1.3325	-0.4191	0.4505	-1.3499	-1.0585	-0.3797	0.0093	-0.4026	0.1715	-0.4356	-0.8538	1.4007	0.7336	0.2925	-0.2252	0.2747	0.2047	0.4027	1.467	-0.0646	-0.4114	-0.4832	-0.6062	-0.8166	0.5238	0.9783	-0.3815	-1.145	0.6433	-0.0704	0.4932	0.1235	0.2326	0.287	0.0622	0.0745
P22466	GAL	Inflammation	0.2774	-0.0606	0.3638	-0.7853	-0.3476	0.0559	0.2813	0.1149	0.8016	0.4818	0.5139	1.8953	-0.3508	-0.1714	0.3453	0.2999	0.0973	-1.3649	-1.2609	-0.3799	-0.5337	-0.9817	0.4237	-0.8317	1.6677	0.4194	1.1319	-0.5742	0.3224	0.3428	-0.0873	-0.7725	1.8702	-0.0371	-1.3658	2.1932	0.9943	0.1711	-1.1169	-0.1478	-0.3845	0.3748	-1.4468	0.5688	2.0476	0.0828	-0.0204
P22528	SPRR1B	Oncology_II	-0.8337	-0.1142	1.1437	0.2412	0.1892	-0.9536	-0.5608	0.034	0.1905	0.1302	0.4859	-1.7028	-0.5181	0.2137	0.4073	-0.6304	1.5888	-0.8861	-0.3137	-0.4971	-0.5951	0.7517	0.1436	-1.4806	1.8353	3.1682	-0.4392	0.0145	1.6769	0.418	0.9584	-0.6329	-0.9851	-0.9457	-0.0145	0.3959	0.7365	-0.1398	-0.8747	-1.1896	-0.2357	-0.8428	-0.2697	0.9912	0.2015	-0.5847	-0.1275
P22676	CALB2	Neurology	-0.1483	0.3452	0.1089	-0.2639	-0.1632	-0.2709	-0.018	0.0464	-0.6689	0.2805	-0.1933	-0.7774	-0.6409	0.0545	0.0676	-0.8165	-0.6048	0.0737	2.4857	-0.1859	-0.1421	1.3796	0.2367	-0.9095	0.5452	0.6576	1.755	1.2108	0.198	2.0507	0.3758	0.0902	-0.0279	-0.0766	1.1763	1.5296	0.1109	-0.457	-0.1212	-0.8811	-0.375	-0.7536	0.2423	-0.2434	0.568	-0.5398	0.186
P22692	IGFBP4	Neurology	-1.3415	0.1217	0.0348	-0.3592	0.4521	-0.246	-0.4351	0.5701	-0.8509	-0.1103	-0.1733	1.0328	0.9162	0.6733	0.0308	0.0012	-0.6169	-1.6681	0.72	0.2445	-0.3396	1.8559	-0.1588	-1.5541	0.9717	3.5272	1.036	0.8782	1.9714	4.0667	0.1896	-0.4629	-1.7612	-0.0938	0.3865	0.5532	0.8295	-0.7199	-0.3584	-1.1159	-0.7185	0.3837	-0.2882	0.1978	2.3066	0.5315	-0.5112
P22748	CA4	Cardiometabolic	-0.3403	0.3905	-0.0581	0.0038	0.5104	0.2343	-0.3823	-0.2069	-0.3096	-0.3756	-0.0038	-0.2098	0.0327	0.0728	-0.1589	-0.4563	0.2005	-0.419	0.0629	-0.247	-0.3846	-0.7229	-0.0801	-0.5628	0.1421	0.6578	0.5231	-0.5742	0.2057	1.1026	0.4691	0.1748	-0.2966	-0.1503	-0.2705	-0.5461	-0.0347	-0.3615	0.1528	-0.5256	0.1399	-0.2759	-0.2053	0.0819	-0.5359	-0.0989	-0.1998
P22749	GNLY	Neurology	-0.8934	0.4913	0.9553	0.2667	0.387	-0.2072	-0.5277	1.009	0.7248	-0.6246	0.0908	0.0836	-0.8309	1.0247	0.278	0.0936	-1.1021	-0.3694	1.5607	-0.2399	0.0605	0.5986	-0.2197	-0.7219	0.4678	0.8206	0.1851	1.1965	1.8738	0.524	1.0466	-1.098	-0.6925	-0.1111	1.0711	-0.4299	1.0154	-1.7406	-0.0782	-0.7866	-0.1952	0.7219	-0.651	0.3596	0.821	-0.1389	-0.636
P22894	MMP8	Neurology	-0.7798	-0.5977	-0.1745	0.2078	-0.3634	-0.0786	-1.935	1.7304	1.2154	-0.896	2.2808	-0.4401	-1.1191	0.0667	1.4314	-1.2514	0.4439	0.5661	3.6732	0.4043	-1.4984	1.6832	0.2927	-0.7373	-0.7065	-0.2627	1.323	-0.1022	-1.1488	0.2346	0.8675	-0.0307	-1.145	0.0307	-0.6755	0.2732	0.8981	-0.2902	-0.3775	-1.8459	2.8619	0.4123	-0.0852	1.569	1.8778	-1.0331	1.8179
P22897	MRC1	Inflammation_II	-0.9869	-0.3764	0.0276	0.1442	-0.5663	-0.0532	-0.733	0.7891	-0.0593	-0.0128	0.2662	0.0962	0.6075	0.2127	-0.0626	-0.8254	-0.202	0.0815	0.8857	-0.3121	-0.2329	1.3801	0.0328	-0.7444	0.9582	0.3567	0.3305	0.2954	0.081	0.5697	0.4256	1.2683	-0.0846	-0.2808	0.0969	0.7331	-0.1136	-0.6456	-0.2381	-1.0602	-0.3481	-0.4389	-0.524	0.185	0.1628	-0.1091	-0.509
P23141	CES1	Cardiometabolic	-0.5447	0.4913	-0.2802	0.2544	-1.3517	-0.6587	-0.3518	0.3228	0.3717	1.3352	-0.3672	0.0902	-0.094	-0.0979	-0.269	-0.041	-0.4872	0.0209	1.018	1.4928	0.3466	-0.4116	0.5592	-0.2033	-1.0241	-1.4601	0.8921	0.801	-0.6078	-0.5733	1.2012	0.4508	-0.684	-0.2581	0.5257	3.2762	-0.4274	-0.929	1.5762	-0.8847	-0.217	-0.077	1.1818	0.4202	-0.3145	-0.8056	0.4646
P23229	ITGA6	Inflammation	0.3113	-0.3101	-0.2914	0.4017	-0.1153	0.1087	-0.3834	-0.2191	-0.171	-0.2402	-0.0432	0.1906	0.1699	-0.0804	0.0269	-0.087	0.8661	-0.3258	0.2417	-0.7281	0.3943	0.6222	0.1475	-0.0116	-0.139	0.0495	0.0116	0.2352	0.1844	0.8982	-0.2623	0.8525	-0.2463	0.864	0.7323	-0.2526	0.0162	0.6591	-0.4876	0.265	-0.2029	-0.2235	-0.2232	-1.1489	-0.2323	0.1751	-0.8463
P23276	KEL	Neurology	-0.1471	0.0573	-0.1775	0.5391	0.1485	-0.3835	-0.3762	-0.5334	-0.0553	0.3916	-0.7618	0.4049	-0.6477	0.0817	0.2409	-0.1236	0.3332	-0.8754	0.4333	-0.0976	0.1436	0.1524	0.1011	-0.6217	-0.4065	-0.6853	-0.5029	-0.1984	0.7233	0.2805	0.2823	-0.225	0.2136	0.1881	0.6418	0.0504	0.4595	0.5757	-0.4672	-0.3678	0.174	-0.702	0.6044	-0.4934	-0.7174	-0.1725	-0.512
P23280	CA6	Neurology	0.9585	1.1502	0.2471	-0.1327	0.9348	0.6711	-0.8868	-0.4209	0.0906	-0.434	0.0742	0.684	-1.2859	-1.3834	-0.0857	-0.0345	-0.369	-0.0135	-3.5616	-0.3716	-0.8487	-1.9821	0.2316	0.6924	0.0417	-0.5073	-0.5222	-0.6717	0.8709	0.1215	-1.5906	-1.0249	0.3399	0.6495	0.3405	0.7609	0.1151	-0.5336	-0.3148	-0.4493	-0.2085	-0.2315	-0.0511	-0.3336	0.4819	-0.7436	0.9352
P23284	PPIB	Cardiometabolic	1.453	0.4051	-0.8139	1.0835	0.4228	0.7468	-0.814	0.5819	-0.1372	-0.6046	-0.1223	0.7085	-0.1763	-0.5424	-0.3791	0.1306	-0.9171	-0.5454	0.4732	-1.3555	-0.6392	0.152	-0.7582	0.1924	-0.1667	-0.3075	0.2533	0.1063	1.0216	0.5796	-0.8336	-0.7137	-0.6484	-0.3545	2.2314	1.1602	0.0555	2.8336	-0.5613	-0.6556	0.5633	-0.3978	-0.3893	-0.27	1.5464	-0.0693	0.2582
P23327	HRC	Cardiometabolic_II	-0.0176	-0.2025	0.3898	0.1607	0.3912	0.4969	0.2621	-0.3384	-0.4274	0.311	-0.2415	-0.3532	0.229	-0.4032	-0.4075	-0.0461	-0.1298	-0.624	-0.1519	-0.3298	-0.3531	-0.4504	-0.2617	-0.4257	0.0833	1.1868	0.0377	-0.0816	0.8299	2.5481	0.1068	0.4629	0.0083	-0.0083	-0.3835	0.3672	0.1341	-0.2501	0.3993	0.537	-0.3755	-0.1147	-0.1819	-0.1087	0.1083	-0.0424	-0.3048
P23381	WARS1	Neurology	-0.4102	0.8473	0.4986	0.3582	0.4294	0.625	-0.4456	-0.5305	-0.204	0.5254	-0.2517	-0.0483	-0.6297	-0.443	-0.3022	-0.8831	0.1398	-0.4688	1.6179	0.4147	0.766	-0.3385	0.0232	-0.4481	0.3752	-0.6398	0.2753	0.3636	1.2042	0.3785	0.4427	-0.0647	-0.0319	-0.3089	-0.0725	2.7135	1.0187	-0.4333	-0.3597	-0.6751	-0.3724	-0.0232	-0.3107	0.2041	0.3355	0.1415	-0.1274
P23435	CBLN1	Neurology_II	-0.7524	0.1453	0.8213	-0.566	-0.0831	-0.1192	-0.4995	-0.0196	-0.4624	-0.2212	0.6398	-2.3999	1.0119	-0.7187	0.4105	-1.9421	-1.0957	-0.2282	2.4166	0.0224	0.0467	-0.4984	0.7184	-0.6181	0.7503	0.7343	0.1817	4.7553	-0.503	-0.3118	0.026	2.2088	3.4281	-0.8935	-0.4926	-0.0593	-1.8557	-0.4473	2.5821	-0.327	-0.6046	-0.221	-0.3435	0.7771	-0.4435	-0.0591	2.3553
P23467	PTPRB	Cardiometabolic_II	0.0833	0.5512	0.23	-0.0419	0.4188	-0.6743	-0.5031	-0.5744	0.3963	0.4415	-0.0393	0.7242	-0.4868	0.0029	-0.1455	0.1893	-0.2783	-0.3162	-0.0809	0.0192	-0.4799	-0.9654	0.2423	0.1015	1.0706	-0.2017	0.1905	0.0449	0.5007	-0.0011	-0.4706	0.3111	-0.3125	-0.558	-0.1066	0.7849	-0.2008	0.005	0.6759	-1.0261	0.44	-0.7035	-0.1466	0.1466	-0.099	-0.6406	-0.1831
P23471	PTPRZ1	Cardiometabolic_II	-0.4093	0.3831	0.3042	0.0174	0.3171	-0.4618	-0.1158	-0.4653	-0.4444	0.3007	0.0697	0.06	0.5456	0.1481	-1.3379	-0.2114	-0.0903	-1.1204	0.2704	-0.6139	-0.3275	1.4273	-0.2132	-0.2692	-0.1788	0.3423	0.0234	1.1887	0.9867	0.5525	-0.0631	0.6239	-0.0178	-0.7053	-0.1943	-0.5197	0.5816	-0.6474	0.665	-0.7525	0.2195	-0.6854	-0.1966	-0.5599	0.96	0.2749	-0.6522
P23511	NFYA	Cardiometabolic_II	0.715	-0.36	-0.0341	4.331	-0.1617	-0.1792	-1.0198	-0.2382	-0.7334	-0.1731	-0.5192	-0.5645	-0.268	-0.0569	1.9217	-0.0094	0.1345	0.171	0.6216	-0.1088	-0.1094	0.7164	-0.2443	0.4648	0.5197	1.6495	0.8062	-0.3989	-0.0224	0.8455	0.0695	-0.9815	0.0503	0.0656	-0.1286	1.8157	0.4559	-0.142	0.1804	-0.4622	0.6192	-0.6155	0.9779	-0.345	0.2189	-0.4805	1.2353
P23515	OMG	Oncology	-0.2601	-1.007	1.2131	1.2699	0.54	0.4333	-0.0035	-0.3762	0.8679	-0.8851	1.7472	-0.2914	-0.932	-1.5586	-0.0728	-0.8523	0.5818	0.0126	0.3929	-0.2789	0.8683	-0.3793	-0.2463	-0.0012	0.3995	-0.9217	-0.716	-0.58	0.2054	-0.3686	-0.4314	-1.3719	1.0376	0.2974	-0.4575	-1.403	-0.46	-0.5311	2.1035	1.3068	-0.0306	-0.1952	0.3314	-0.8305	0.229	0.0067	-1.1214
P23526	AHCY	Cardiometabolic	0.7972	-0.254	-0.511	0.6371	-0.5247	0.8752	-0.6893	0.7672	0.4049	-0.4789	-0.5891	-1.1383	0.1143	0.1562	-0.1569	-0.3207	-0.4502	-0.1803	2.069	-0.3116	-0.2298	0.291	-0.3707	-0.0618	-0.2385	0.2998	0.81	-0.5891	0.8167	0.1285	0.9268	-0.0844	-0.3192	-0.1663	0.811	3.2861	1.4852	1.8383	-0.1017	-0.3467	1.4379	0.3644	0.4407	-0.0699	1.1012	-1.2131	-0.9011
P23560	BDNF	Cardiometabolic_II	2.1057	1.559	-1.62	-0.0649	0.7434	0.9133	-2.4021	0.5674	0.2367	-2.5107	-0.7168	1.6842	-2.2086	-2.5205	-0.1037	-3.5329	-0.8054	-1.1768	1.2302	-2.6299	-0.0284	-0.9435	-1.5816	-1.2098	-1.874	-2.3371	-0.4444	-0.2937	0.7608	0.1104	-0.3883	-3.5863	-0.2739	1.1	2.8251	-1.3092	0.5445	1.8754	-1.7706	1.2771	2.839	-3.9933	-0.1806	-0.8225	0.9838	-2.8798	0.0284
P23582	NPPC	Inflammation	-0.0404	-0.9352	0.2117	0.4645	-0.087	0.1597	-0.6287	0.3461	-0.1153	-1.4301	0.2137	0.0927	0.4072	2.1574	-0.0455	0.2717	0.6356	-1.1443	0.5361	-0.8078	-1.4976	-0.1858	0.1255	-0.1613	0.9958	3.3893	1.4034	-0.4347	0.7373	4.3565	0.2483	-0.3679	0.359	0.0782	-0.3725	3.2294	1.3124	-0.6726	-0.7083	-0.4822	-0.3505	-0.7214	0.0815	1.4612	1.0356	-0.0914	0.2309
P23588	EIF4B	Neurology	0.8263	-0.0226	-0.6585	0.9197	-0.0114	1.193	-1.7146	0.0084	0.4959	-0.335	-0.5496	-0.6635	-0.6622	-0.8569	0.7039	0.0875	0.3753	-0.2971	2.0751	0.2371	-2.2542	-0.5389	0.1115	0.1189	-0.5776	0.1166	-0.8401	-0.1203	0.4933	1.2941	0.4252	-0.5386	-0.4202	-0.1821	0.2826	0.8231	1.3097	2.0476	-1.0424	-0.8342	0.939	-0.4121	1.1737	-0.3993	-0.4304	1.4275	-0.682
P23634	ATP2B4	Cardiometabolic_II	0.2292	-0.0167	-0.0913	0.2726	-0.3754	-0.124	-0.3403	0.3519	-0.1695	-0.4503	0.3935	-0.1535	0.1631	-0.0335	-0.1392	-0.177	0.4701	0.2757	3.4133	0.3361	-0.4422	0.3174	1.2245	-0.0001	-0.4352	1.083	-0.3192	0.4818	-0.0056	-0.0041	0.1814	2.8502	-0.1124	-0.3577	-0.1425	0.0941	-0.4255	-0.0446	0.2111	-0.5347	-0.2167	0.1201	-0.063	0.3741	0.2053	-0.0559	-0.4178
P23743	DGKA	Inflammation_II	0.175	-0.2065	-0.083	-0.6281	-0.7823	0.4789	-0.8281	-0.1737	-0.3242	-0.2113	-0.7153	0.2722	-0.2885	-0.4418	0.0261	-0.3643	-0.0259	-0.0674	1.1509	-0.0928	0.0601	0.3021	0.2106	0.1861	-0.6857	-0.0816	-0.3156	0.3078	0.029	0.6544	0.8516	-1.0136	-0.2862	0.4413	0.7002	0.4712	-0.0067	1.0869	-0.2363	-1.069	0.1477	-0.266	-0.3902	-1.1949	0.9144	0.2095	0.0817
P23771	GATA3	Oncology_II	-0.4054	-0.2539	0.0358	-0.4564	0.2449	-0.0258	-0.1825	0.115	-0.3684	-0.6444	0.0872	0.3928	0.0113	-0.6585	0.4228	0.1049	0.362	-0.0765	0.0325	-0.7591	0.0175	-0.0014	-0.4349	-0.0089	-0.1833	0.1917	0.0143	0.292	0.2078	0.6265	-0.0111	0.2196	-0.648	-0.1939	0.278	-0.2339	0.5937	0.2522	0.231	0.1775	0.4243	-0.2227	-0.7591	-0.4185	-0.1735	0.3337	-0.328
P23919	DTYMK	Cardiometabolic_II	0.9389	-0.1963	-0.3033	0.1983	-0.7613	1.3011	-1.5103	-0.2301	0.699	-1.0324	-0.6668	-0.4087	-1.0122	-1.0069	0.2504	0.5505	0.1771	-0.2792	2.7587	0.402	-0.9739	-0.6392	-0.3702	-0.0338	-0.3265	0.6824	-0.8312	0.056	1.1662	1.7426	0.215	-0.4556	-0.4789	-0.5627	0.4643	0.188	1.2877	1.5949	-0.4271	-1.3508	1.3112	-0.8432	0.9549	-0.133	-0.2605	0.6975	-0.8799
P24001	IL32	Inflammation	-0.4578	0.6612	0.2943	0.1814	0.0905	-0.1531	-0.1642	-0.6555	-0.9033	1.8788	0.3821	0.1187	-0.8069	-0.4201	-0.2077	-0.9286	0.3725	-0.9041	-0.9715	-0.1706	1.1196	-0.5513	0.0063	-0.3733	1.311	0.2911	-0.0862	0.5749	0.6695	0.8403	-0.4724	0.5203	0.0488	0.1941	-0.8059	-0.3313	0.4575	-0.4969	-0.6989	-0.4849	-0.4079	-0.6679	-0.4945	-1.4913	0.4308	0.7372	-0.3006
P24071	FCAR	Inflammation	-0.3438	0.1495	-0.2809	0.4743	-0.5028	-0.0487	-1.1713	-0.6015	0.087	-0.6182	0.2729	-0.2704	0.6116	0.7356	-0.3985	0.093	-0.8498	-0.3285	1.2431	-0.56	-0.0541	1.7469	0.0477	-1.2495	0.4679	0.4505	0.9542	0.4959	0.5841	-0.3776	0.9724	-0.3411	-0.4614	-0.975	0.4923	1.6349	0.9005	0.0116	-0.9432	0.1125	-0.1372	-0.7201	0.1514	-0.2374	0.4207	-1.1141	0.0459
P24158	PRTN3	Cardiometabolic	-0.6077	-0.0254	-0.1079	0.2882	0.0713	0.9663	-1.1579	0.3844	0.2508	-0.4101	0.2558	-0.6289	0.0826	0.2023	0.4719	-0.9099	0.0422	-0.4034	1.2766	-0.4968	-1.0018	0.6021	0.4801	-0.6102	-0.2524	0.3254	0.7046	-0.2028	-0.0505	0.0671	1.0986	0.0538	0.1944	-0.2742	0.4394	0.8136	0.5478	-0.4626	-0.6614	-0.5339	0.8203	0.3198	0.2841	0.4065	1.6481	-0.2899	-0.076
P24386	CHM	Neurology_II	0.3086	0.4214	0.2621	-0.2859	-0.5525	0.8318	-0.299	-0.2534	-0.1489	-1.1303	-0.1305	-0.27	-0.375	0.0123	0.7663	-1.2461	-0.8637	-0.0979	1.1048	0.6617	-0.4884	-0.5875	-1.3615	0.6635	0.0211	0.8647	0.7291	-2.1752	0.4202	-0.317	0.7778	-1.3435	-0.7622	-0.0194	-0.9992	2.8928	1.0422	1.3938	0.409	-0.4916	0.2862	-0.5256	-0.5118	-0.6728	0.4988	-0.1102	0.1704
P24387	CRHBP	Inflammation	-0.6929	0.4641	-0.2249	0.0208	0.3697	-0.3866	-0.1556	0.2227	0.1535	-0.0299	-0.0008	0.2371	-0.0093	0.0356	0.2056	0.1698	-0.1804	-0.1721	-0.0179	0.1718	-0.5738	-0.0252	0.3816	-0.3842	0.3715	0.5825	0.6288	0.2706	0.3495	0.9236	0.0357	-0.0315	-0.1722	-0.0949	0.3218	0.4216	-0.0708	-0.138	0.0966	-0.4259	0.0001	-0.2747	-0.2523	0.2472	0.2637	0.2643	-0.3911
P24394	IL4R	Inflammation	-0.4864	-0.2224	0.7764	0.0115	0.9178	0.1236	-0.291	0.8513	-0.4871	0.5841	0.1982	0.7101	1.4414	-0.9522	-0.3881	-0.1133	-0.175	-0.4214	0.4667	-0.0853	-1.8324	-0.065	0.2983	0.0023	-0.1556	0.109	-0.9665	0.4749	-0.2403	1.3862	-0.5272	-0.7437	-0.0561	-0.7004	-0.0023	1.4612	-1.1256	-0.2491	-0.3653	0.1123	-1.8966	0.1717	-0.1307	-0.0973	1.2453	0.5217	0.1889
P24530	EDNRB	Inflammation_II	-0.2682	-0.3803	-0.1874	0.1261	0.4363	-0.17	-0.2087	-0.1611	-1.0046	-0.23	-0.2713	0.6393	0.1423	-0.0832	-0.1739	0.2695	-0.3566	-1.0011	0.7524	-0.3728	-1.6642	0.8101	0.2383	-0.7316	0.329	1.9566	0.7398	0.0661	0.6439	3.1573	0.099	0.18	-0.6168	1.0545	0.0117	0.5689	-0.1124	-0.4745	0.0481	-0.446	-0.4716	-0.15	-0.1606	-0.203	0.626	-0.1913	-0.4826
P24592	IGFBP6	Cardiometabolic	-0.4232	0.3885	0.5419	0.007	0.4939	0.4185	0.0579	0.2325	-0.6655	-0.6121	0.129	0.3542	0.0544	0.2818	-0.1298	-0.0617	-0.1751	-0.7415	-0.248	-0.4592	-0.6688	0.2297	0.0226	-0.9287	0.9294	1.705	0.5247	-0.1534	1.1748	2.6395	0.094	-0.2663	-0.1353	0.0334	0.0323	-0.7912	0.4314	-0.0619	-0.5904	-0.1632	-0.2137	-0.2028	0.3257	-0.3915	0.3466	-0.3265	-0.3756
P24666	ACP1	Inflammation_II	1.4073	-1.0798	0.3267	-0.3056	-0.6797	0.7278	-1.0471	0.4928	0.0963	-0.0709	0.1073	-0.0996	0.17	-0.8036	1.1746	0.126	0.319	-0.1768	1.639	-0.5255	-0.5183	-2.3602	0.6704	-0.2413	-0.2822	-0.1285	-1.2341	-0.2652	0.3933	1.6607	-0.0258	-0.3038	-1.4069	0.416	-0.5075	0.3199	1.4721	0.3797	-0.4649	-1.4379	1.2923	0.111	1.1809	-0.4788	-0.6594	0.7444	-0.8232
P24821	TNC	Cardiometabolic	-0.5855	0.3611	0.2678	-0.132	0.2764	-0.4012	-0.8665	0.8754	0.318	0.6331	0.5037	0.077	0.7981	1.1264	0.5013	0.3344	-0.2233	-0.1457	1.5408	0.625	-0.1453	1.5705	-0.1565	-0.532	0.1525	1.2492	-0.3981	0.6836	0.7082	0.4421	-0.1006	-0.2138	-0.3243	-0.8018	0.1553	0.8206	0.66	-0.9014	-0.8179	-0.7857	-0.2512	-0.2167	-0.0349	0.682	1.0991	0.9459	-0.3042
P24864	CCNE1	Inflammation_II	-0.0866	-0.588	0.0863	-0.3344	-0.4869	1.0515	-0.1224	0.476	0.1	0.4835	-0.3887	-0.1915	0.2501	-0.3049	0.2883	-0.3706	-0.2324	-0.2878	0.0736	-0.3776	-0.0953	-0.2891	0.2283	0.6413	0.3961	-0.0888	0.3669	0.3978	0.4939	0.4609	-0.0816	-0.3044	-0.2518	0.145	-0.1937	5.6548	0.1348	-0.1933	0.0997	-0.3253	-0.289	-0.0102	-0.247	0.1451	0.4166	-0.2112	0.551
P24928	POLR2A	Inflammation_II	-0.8628	-0.2439	0.1135	-0.6423	-0.2639	-0.3906	-0.688	-0.278	0.0289	-0.4855	0.28	-0.1121	-0.2214	-0.5716	-0.0284	0.721	1.7117	0.0038	-0.6028	-0.7564	-0.0038	-0.5576	0.8704	-0.1125	0.5149	-0.0908	0.3497	-0.0332	0.3622	-0.03	0.0043	0.3793	-0.9377	0.2197	-0.1235	-0.0471	-0.1476	-0.0897	0.3303	-1.1051	-0.5132	0.438	-0.3544	2.0107	-0.2279	-0.1343	0.3417
P25092	GUCY2C	Oncology_II	2.0636	0.5205	-0.5831	-0.8349	-0.2257	0.6375	-0.3358	-1.4189	-0.3627	-0.3176	1.9539	0.5752	-0.1041	1.7187	-0.2835	1.8192	2.0303	0.507	1.3262	0.7282	-0.9996	-1.4942	-0.8064	-0.7011	0.0771	1.8026	1.2425	2.5405	-0.9116	-0.8285	-0.6999	-1.1546	-0.0278	-0.5929	0.2368	-0.8203	-0.2916	0.0463	-1.5585	0.9421	-0.4679	-1.417	-0.7556	1.9547	-0.4353	0.1955	-0.1808
P25116	F2R	Inflammation	0.3502	0.1138	-0.0312	0.3763	0.2811	0.2881	-0.449	-0.0157	-0.6879	-0.392	-0.4227	0.4062	0.2603	0.0882	-0.3753	-0.3772	-0.8496	-0.883	0.5757	-1.1005	-1.208	1.0389	-0.3045	-0.4563	0.2455	1.739	-0.1371	0.2834	1.2204	2.9658	0.3003	0.3064	-0.3107	0.2042	0.3715	0.6203	0.1627	0.9415	-0.4449	-0.2247	-0.2322	-0.2872	-0.3496	-0.4832	0.8215	0.1193	-1.023
P25391	LAMA1	Cardiometabolic_II	-0.2719	0.8502	-0.3578	-0.9974	0.3672	0.6462	-0.1857	1.1002	0.075	-0.3499	0.0228	-1.0371	1.6928	-0.4447	-0.2898	-0.3939	0.3133	-0.395	-0.5384	0.159	0.013	-0.3624	-0.4688	-0.3903	-0.2334	1.3963	-0.7067	-0.1016	-0.6514	0.5874	0.2175	1.1759	-0.1175	-0.7214	-0.2686	0.3864	1.6081	0.2934	-0.3612	1.0189	-0.2645	-0.3686	0.0397	-0.8019	-0.2158	-0.6684	0.8719
P25440	BRD2	Neurology_II	-1.4457	-0.3336	1.1867	1.107	-0.3555	0.1661	0.4702	0.5215	-0.0272	-0.3491	-0.3307	-0.4452	-0.0538	-0.1742	0.2275	-0.2441	-0.0999	0.2228	0.8559	-0.6719	1.0999	-0.3122	-0.2282	-0.024	-0.7599	0.5303	-0.3571	-0.1199	1.0136	-0.0193	-0.6156	0.8426	3.4986	0.3666	0.2918	4.5076	0.6472	1.5937	-0.3379	0.5724	-1.2451	0.2804	0.1649	-0.2515	0.9308	-0.8237	-0.1983
P25445	FAS	Cardiometabolic	-0.6678	0.2116	0.4751	0.241	0.3689	0.2193	0.003	0.4849	-0.2469	0.1534	-0.0962	0.1057	-0.1491	0.1623	-0.1092	-0.2664	-0.183	-0.923	-0.5596	-0.4096	-0.4252	0.5073	0.3849	-1.0306	0.4979	0.6813	-0.3264	0.1638	0.7148	1.2488	0.3936	0.1592	-0.1054	-0.124	-0.2382	0.8799	0.2659	-0.0386	-0.3825	-0.4256	-0.0545	-0.2067	-0.1045	-0.0067	0.6335	0.2481	-0.1291
P25490	YY1	Inflammation_II	-0.0661	-0.6663	0.5486	-0.4259	-1.0202	-0.466	-0.1105	0.3937	0.4244	-0.7143	-0.558	-0.328	1.038	-0.7333	0.5561	0.3063	-0.267	-0.2219	0.2923	-0.9928	0.3883	-0.3181	1.2454	-0.2796	2.7899	-0.4543	-1.115	0.6964	0.5663	0.555	0.2203	-0.3225	-1.2202	0.677	-0.3725	2.1009	0.4176	0.0046	0.1215	-0.2875	0.3316	-0.6818	-0.479	-0.0046	-0.3975	0.237	-0.9097
P25685	DNAJB1	Oncology	0.6963	-0.1013	-0.3872	-0.1001	-0.5375	1.7266	-1.9461	-0.4644	-0.7704	-1.2906	-0.8587	-0.4714	-0.8684	-0.8962	0.4449	0.9285	0.2522	-1.1657	2.6986	0.8839	-2.8596	-0.1471	-1.224	-0.1696	-0.0076	0.5296	-0.5744	0.0076	2.0783	2.6202	0.3544	-0.5458	-0.6841	-0.982	1.2765	2.0132	1.6376	2.3671	-0.9139	-2.0856	1.1228	-1.148	1.1871	-0.5094	0.0413	0.5354	-0.236
P25686	DNAJB2	Inflammation_II	0.1392	-0.1277	-0.1028	-0.2503	0.2339	1.0537	-1.3371	1.1994	0.7416	0.3994	-0.285	-0.0999	-0.8002	-0.5479	0.8328	0.4174	0.2263	0.0028	2.3907	0.3791	-0.4916	-0.2037	0.9351	0.0775	0.1683	0.425	-0.675	-0.0833	0.9315	1.5333	0.9712	-0.2168	-0.4364	-0.4856	-0.536	0.5002	1.0276	0.5642	-0.6296	-1.4617	1.2783	-0.6389	0.691	-0.4387	-0.1989	0.8884	-0.4817
P25774	CTSS	Neurology	-0.5474	-0.0262	-0.0216	0.2449	0.3374	0.0762	-0.1439	0.2925	-0.1364	0.1199	0.0811	0.0138	0.038	-0.379	-0.1018	0.0934	0.0557	-0.1308	-0.0839	0.125	-0.3019	-0.1506	0.0102	-0.2089	0.3406	0.1015	0.2056	-0.0396	0.4247	0.2452	-0.0853	-0.0298	-0.0517	-0.1415	-0.1114	0.2331	0.5487	-0.1542	0.1262	-0.2236	0.1866	-0.2979	0.0111	0.1437	0.1357	0.0565	-0.0089
P25786	PSMA1	Oncology	0.4176	-0.2287	0.3524	0.1803	0.0866	0.5979	-0.4319	-0.1933	0.2991	-0.5603	-0.8388	-1.012	-0.6656	-0.0095	-0.4586	0.2174	-0.3351	-0.8793	0.8376	-0.3341	-0.8417	0.9559	0.6689	-0.421	-1.2407	-0.4315	0.0095	1.572	0.3094	0.4873	1.2384	-0.6256	2.5704	0.3564	-2.1042	0.6566	-0.0876	-0.1329	-0.4108	-1.4916	-0.0934	-0.6126	0.6671	0.7309	-0.0096	-0.418	2.6037
P25815	S100P	Cardiometabolic	0.0535	-0.5769	-0.1195	0.7121	0.0358	0.1634	-0.2779	-0.1198	0.5881	0.1119	0.0029	-0.0084	-0.1567	-0.0235	0.2415	-0.2783	-0.0152	-0.2286	0.5017	0.0184	-0.4382	1.5366	-0.2555	0.1183	0.4631	0.045	1.4249	-0.2802	0.4366	0.6815	0.5428	-0.2245	-0.4064	-0.333	0.0938	1.502	0.2724	-0.398	-0.4202	0.1754	0.9962	-0.4295	0.1749	-0.3018	1.2941	0.6792	-0.328
P25942	CD40	Inflammation	-0.1914	0.4049	-0.1153	-0.3724	-0.1008	0.0181	-0.1839	0.2256	-0.4567	0.7512	-0.4167	0.7575	0.0819	0.3619	-0.2573	-0.2545	-0.4627	-0.7502	0.6573	-0.3456	0.1143	1.4742	-0.029	-0.4283	0.6937	1.6429	0.3881	0.3679	1.1319	2.9625	-0.1774	-0.1944	-0.4248	-0.0353	1.3056	0.5931	0.4479	0.4352	-0.22	-0.2568	-0.9142	-0.3394	-0.1407	-0.3656	1.5079	-0.11	-0.3664
P26010	ITGB7	Oncology	0.0666	1.1357	0.9804	0.9359	0.1974	0.1789	-0.2333	-0.7503	-0.9675	0.0777	0.0729	-0.2031	-0.6742	0.1745	-0.7939	0.913	0.4807	-1.266	-1.3539	-0.3881	-0.3707	0.9255	0.0523	-0.4239	0.004	-0.2247	-1.566	-0.5438	0.5318	-0.0929	0.1312	1.5804	-0.0265	1.0744	0.1263	-0.3887	-0.3158	-0.4294	0.2287	0.0388	-0.4196	-1.6367	-0.8145	-0.6628	-1.0722	0.5904	-0.7011
P26022	PTX3	Inflammation	-0.1399	-0.499	0.0563	0.2651	0.1745	0.499	-0.1344	0.4771	0.0034	0.6614	0.0358	0.6001	-0.0608	0.282	-0.0298	-0.0103	-1.5439	0.2621	0.9527	0.509	-0.0034	0.9709	0.5668	-1.3025	-0.7839	-0.1828	0.2863	0.9174	0.5725	0.3631	-0.9437	0.8678	-0.2675	0.0144	0.2102	0.392	-0.29	-0.5298	-0.2225	-0.4572	0.2306	0.7086	-1.1281	0.5063	1.0463	0.5383	-0.2999
P26378	ELAVL4	Neurology_II	-1.2307	0.0738	-0.2981	-0.0068	-0.3888	0.4719	-0.6317	-0.9046	2.4351	-0.1763	6.3729	0.0845	0.3876	0.0615	-0.9617	-1.2611	-1.0258	-0.7301	2.9334	-0.922	-0.8617	0.0068	-0.4842	-1.4782	0.2784	0.9285	-0.2467	-0.3219	2.0046	1.141	0.3167	1.2068	-0.3376	-1.3081	1.3546	11.1816	-0.5054	-0.9118	-1.3253	-0.8646	-1.4605	-0.4284	3.2395	0.2999	0.9845	-0.0922	0.2079
P26436	ACRV1	Inflammation_II	-0.4799	1.9967	0.7002	1.8601	0.3045	3.8423	-2.2464	0.8934	1.5209	0.3449	1.4577	1.8478	0.3544	-1.9829	0.338	-0.2147	0.0037	-1.3381	-1.8233	-2.6248	-1.7379	0.6839	3.1209	-1.2483	1.1624	2.0406	-0.5151	-2.2191	2.7266	-0.5674	-2.0664	-0.2153	1.0755	2.8854	-1.6002	-0.853	2.7334	0.7032	-1.5458	1.3783	-0.6285	-1.8461	1.2112	-0.4013	-0.215	0.6255	-0.0037
P26440	IVD	Neurology	1.3226	0.433	-1.2147	-2.0479	0.6389	-0.0565	-0.6463	0.9847	-0.0175	-0.3595	0.2415	-1.3572	-0.8126	0.0892	0.4771	-0.0556	0.3847	0.1133	1.0415	0.2447	-0.767	-0.3245	0.2967	-1.598	0.8629	0.2197	-0.1019	0.8005	-0.2346	-0.7873	0.1401	-0.1092	-0.2782	-1.9572	0.4051	-0.3565	0.0636	0.851	0.6263	-0.6403	-0.9455	-0.6305	-1.1333	0.683	-0.2391	0.0011	1.0001
P26441	CNTF	Neurology_II	-1.188	-0.0043	-5.778	0.6653	0.7051	0.9345	-5.7753	-0.1577	0.2081	0.0043	-0.1143	-1.3732	0.0565	0.6378	0.5966	0.1879	0.2577	-4.7605	1.2341	0.7463	0.2971	-0.9515	-1.2234	-0.0752	-1.3601	0.6411	-1.1214	-0.7291	0.6975	1.636	-1.709	-0.5065	-0.789	-1.6704	0.0508	-0.7591	-2.4564	0.6091	0.1068	0.1179	0.4086	0.5002	0.5417	0.9798	-0.7339	-1.9846	0.4618
P26447	S100A4	Oncology	0.3401	0.0486	-0.466	0.0511	-0.3135	0.5339	-0.7638	0.0854	0.3466	0.4318	-0.1163	-0.7184	-0.5943	-0.2867	-0.0954	0.4745	0.0049	0.9568	2.2014	0.3965	-0.6026	-0.7072	-0.0472	0.3207	-0.0801	-0.2872	-0.5708	-0.2843	0.5953	1.3932	0.201	-0.3258	-0.2955	-0.1822	0.0153	1.1817	1.1325	0.7293	-0.1095	-1.018	1.5343	-0.9154	0.6023	0.0898	-0.5739	0.8791	-0.7758
P26639	TARS1	Oncology_II	1.2403	0.1457	-0.6453	0.6005	-0.0259	1.1973	-1.4477	-0.5016	0.0568	-0.1076	1.1441	-0.0656	-0.1257	-0.5517	0.3979	-0.4482	0.0799	-0.3094	1.8012	-0.5142	-1.0466	-0.4027	-0.3888	0.5694	-0.1881	0.3142	-0.1326	-0.0291	0.2878	-0.0789	0.4481	-0.2414	-0.0832	-0.4691	0.5693	2.2602	0.3288	1.7332	-0.6335	-0.107	0.0908	-0.4591	-0.146	-0.3823	0.8457	-0.8183	-0.3819
P26715	KLRC1	Neurology_II	0.0954	-0.2228	-0.7713	-0.8595	0.5057	0.9558	0.7397	0.3845	-0.1178	0.4164	-0.0653	0.3038	-0.0019	0.5855	0.0786	-0.3302	0.1619	-1.4043	-0.1262	0.3454	1.6138	-0.4685	2.1728	-1.8931	4.6199	-0.3162	0.2858	4.2722	-0.5488	0.1111	1.4876	0.5687	-0.8061	-0.6145	-0.3004	0.1238	-0.8263	0.0958	-0.2316	-0.4968	-0.3218	-0.2203	0.2682	0.7351	1.1046	0.2548	-0.2008
P26718	KLRK1	Neurology_II	0.1925	0.3332	0.4894	0.0822	0.3184	0.1202	0.0163	-0.0431	-0.6091	0.1179	-0.1542	0.3397	0.3716	0.3085	-0.4622	-0.3225	-1.2012	-0.4448	-0.1309	-0.458	-0.1312	0.4626	0.0074	-2.4007	1.2037	0.9569	-0.0089	-0.1385	0.7067	1.3088	0.597	0.6077	-0.0145	0.9398	0.3285	-0.8066	-0.0432	-0.6988	-0.1814	0.1932	-0.4532	0.5497	-0.597	-0.0162	0.2046	0.4302	-0.363
P26842	CD27	Oncology	-0.4809	0.4401	-0.1894	-0.2148	0.408	-0.1442	-0.2093	0.3377	-0.4726	0.6171	-0.1133	0.3553	1.5709	0.3226	0.3418	-0.0976	-0.1556	-1.2207	0.9916	-0.2706	-0.6806	2.1856	0.0198	-1.6111	0.677	1.7053	-0.0198	-0.0254	0.7592	2.6017	0.3553	0.9279	-0.1041	0.8776	-0.3877	0.4702	-0.1096	-0.6331	-0.0837	-0.1729	0.0511	-0.0703	-0.173	-0.0725	0.8669	0.4921	-0.364
P26927	MST1	Inflammation_II	-0.9184	0.2881	-0.1324	0.4759	-0.1745	-0.1735	0.1155	-0.2687	0.5524	0.1891	-1.0325	0.63	-0.1407	-0.6972	-0.6316	-0.1995	-0.4089	0.14	-0.3006	-0.6859	0.2805	0.013	-0.0808	0.156	0.2085	-0.8507	0.139	-0.6058	0.264	0.0366	0.2232	-0.2784	-0.3705	-0.4158	0.3978	0.502	0.2667	0.1548	0.0537	-0.4895	-0.041	0.0411	0.4021	-1.6311	1.0174	0.2815	-0.6939
P26951	IL3RA	Inflammation	0.1567	-0.4576	-0.2029	0.0351	0.4986	-0.1259	-0.3803	0.3548	-0.3576	0.119	-0.6692	0.4971	0.1165	0.0584	-0.4856	0.1737	-0.068	-0.4819	-0.0357	-0.8719	-0.2084	-0.5087	-0.4543	-0.1288	0.3181	-0.1622	-0.1174	-0.6081	0.6284	0.5754	-0.0709	0.3614	-0.0951	0.5373	0.262	0.4087	0.3199	-0.1738	-0.0202	-0.5762	-0.493	-0.6849	-0.0145	-0.4795	-0.1965	-0.348	0.307
P27169	PON1	Inflammation_II	0.0127	0.2439	0.1847	-0.1714	0.0067	-0.0153	-0.222	-0.2165	-0.1767	-0.1231	-0.0415	-0.2345	0.0535	-0.1673	0.0171	0.0479	-0.3745	0.1763	-0.1861	0.3138	0.297	-1.762	-0.0756	-0.1327	0.03	-0.7524	0.0002	-0.2795	-0.009	-0.0451	0.1992	-1.3436	0.3071	-0.1434	0.0698	-0.2621	0.0481	-0.1822	0.1049	-0.1981	-0.1502	-0.2858	0.1759	-0.0836	-0.9419	-0.0002	0.2675
P27348	YWHAQ	Inflammation_II	0.5908	-0.4476	0.0719	0.2179	1.062	0.6846	-0.5293	2.2639	-0.139	0.6461	-0.1997	-0.4167	-0.3116	-0.4104	0.2045	-0.0219	-0.0026	-0.4858	1.741	-0.1846	-0.1141	-0.0406	1.3213	-0.1926	-0.3219	-0.0438	-0.1217	-0.363	0.3606	0.3774	0.4614	-0.2596	-0.2378	0.0068	0.2507	3.6805	0.2718	1.398	-0.56	-0.3005	0.4436	-0.2262	-0.0345	-0.5002	0.5662	-0.0668	-0.4391
P27352	CBLIF	Cardiometabolic	-1.2695	1.9919	0.0008	-0.2081	-0.1312	1.999	0.8885	0.1618	0.6612	1.7478	0.2255	1.3215	-2.2583	0.5757	-1.4526	-0.9184	0.082	-2.3907	-1.1265	-0.7451	-0.1964	-2.0239	0.8833	-0.6367	-0.0008	-0.1515	-1.2829	-0.9043	0.4212	1.996	0.4543	-0.6253	-0.7415	-0.675	0.4129	0.1712	0.9245	-0.3945	0.34	-0.1463	1.827	0.9063	-0.3212	-2.0013	0.0587	-0.8686	0.2381
P27487	DPP4	Cardiometabolic	-0.2737	0.9174	0.5488	0.1324	0.5569	0.2853	0.0792	-0.3644	-0.0058	0.5054	0.1242	0.3443	-0.6797	-0.812	-0.5585	0.0058	-0.2607	-0.3115	-0.0557	0.6807	0.217	-0.3752	-0.1766	0.5795	0.0957	0.1143	-0.0769	-0.3222	0.5541	-0.0305	-0.6419	0.3467	0.2928	-0.3936	-0.8597	0.4002	0.0937	-0.1349	0.3501	0.1169	-0.3561	-1.0024	0.3064	-0.2835	-0.3951	-0.2701	0.1335
P27540	ARNT	Inflammation	-0.0223	1.4722	0.4233	-0.055	-0.3185	-0.1545	-0.1892	-0.0041	-0.2174	1.1149	-0.0606	-0.1004	0.0016	-0.1858	-0.0554	-0.1819	1.5751	0.252	0.048	-0.9499	-0.3987	-0.4731	1.6709	0.4088	1.0389	1.4359	-0.304	0.0681	1.4368	-0.2611	0.1037	-0.4378	-0.3459	1.3497	2.4204	0.5255	-0.0016	-0.4564	-0.6119	-1.2236	-0.7123	1.2558	0.3847	-1.3174	0.308	-0.2028	0.7653
P27695	APEX1	Oncology	0.0248	-0.5042	-0.2043	0.8174	0.1369	0.3932	-1.0765	0.0875	0.1322	-0.3617	-0.1886	-0.1645	-0.2765	-0.269	1.0971	-0.9444	-0.2731	-0.6931	0.6129	0.0022	-0.5376	-0.2196	-0.298	0.3757	-0.0779	0.3481	0.2555	-0.4248	0.226	1.6646	3.02	-0.6083	-0.66	1.5358	-0.9629	3.4275	1.235	0.407	-0.9396	-0.728	1.4987	0.6561	0.457	0.0869	0.2168	-0.0889	0.3783
P27701	CD82	Oncology_II	-0.1511	-0.1784	-0.3894	-0.9689	-1.0383	-0.8093	-0.9222	-0.1224	0.2064	-0.3939	-0.0414	-0.0027	-0.083	-0.9218	0.9738	0.0145	0.0426	-0.1962	0.0298	1.1926	0.2736	-0.3986	-0.6085	1.6364	0.4389	-0.1133	0.2317	0.047	-0.4819	0.0646	-0.0765	2.0491	0.3164	-1.3804	-0.2009	0.3495	-0.1444	1.2426	1.3188	-0.1465	-0.6544	0.0758	0.4407	-0.3526	0.3044	0.3502	0.2125
P27918	CFP	Inflammation_II	-0.1307	-0.1156	-0.1416	0.2304	0.0754	-0.2083	-0.0455	0.9126	-0.1989	-0.119	0.1287	0.3164	-0.2568	-0.2215	-0.1053	0.2108	0.0844	0.423	-0.1223	0.021	-0.1013	-0.4671	1.4334	-0.2208	0.1525	0.0699	0.1697	-0.2079	0.2137	0.0819	0.2243	0.1694	0.0032	0.0281	0.0624	0.2015	-0.0093	-0.095	0.2476	-0.5069	0.1047	0.0285	0.0323	0.0648	-0.1541	-0.2165	-0.0293
P27930	IL1R2	Inflammation	-0.0363	0.5808	0.1785	-0.3022	0.2479	0.0319	0.1905	-0.2347	0.0671	0.1878	-0.19	-0.0995	-0.582	0.0655	0.1469	-0.1147	-0.0214	-0.0105	-0.4207	0.2702	-0.3266	-0.5431	0.1526	0.1887	-0.1269	-0.3652	-0.0026	-0.4802	0.4012	-0.0413	-0.2196	0.3911	0.3402	-0.3571	-0.049	0.1396	-0.2366	-0.0265	0.2349	0.2544	0.0351	-0.4171	0.6513	0.048	0.0075	-0.1409	-0.0115
P28325	CST5	Neurology	0.322	-0.4676	-0.1678	0.0049	0.612	0.1321	0.2051	-0.9433	-0.3663	-0.2327	0.2262	0.0572	-0.222	0.0526	-1.5588	-0.39	0.4599	-1.451	-1.0358	0.1506	-0.1822	0.2168	0.1395	-0.9934	0.1865	1.4555	0.0647	-0.8683	-0.517	1.0772	0.7791	0.1711	-0.2825	-0.2513	0.5321	-0.552	0.1175	-0.8492	-0.7963	-1.0186	-0.7208	0.0087	-0.5563	-0.5447	0.1499	0.0066	0.0315
P28799	GRN	Neurology	-0.4612	-0.1175	0.0541	-0.2024	0.2919	-0.3231	-0.0314	-0.002	-0.1575	0.573	-0.1281	-0.2646	0.4285	0.1904	-0.1172	-0.1766	-0.1108	-0.4724	0.4801	0.133	-0.4628	-0.0569	-0.148	-0.1043	0.3059	0.3702	0.1969	-0.0241	0.6387	0.5782	0.3168	0.4135	-0.0537	0.6279	0.2638	1.436	0.2637	-0.5694	-0.0425	-0.3945	0.2013	0.0706	-0.4622	0.3029	0.3228	0.2372	0.3152
P28827	PTPRM	Inflammation	-0.0177	0.2082	0.258	0.152	1.0202	-0.0521	-0.2512	0.2612	-0.0835	0.3196	-0.0233	0.3843	-0.134	0.1387	-0.3768	0.2247	0.0332	-0.5299	-0.0618	-0.4336	-0.2536	0.2052	-0.1372	0.1335	0.5788	-0.4394	-0.4365	-0.016	0.6315	0.217	-0.1124	0.4398	-0.0066	0.316	-0.146	0.3451	0.0743	0.0006	-0.1241	-0.2252	0.1999	-0.618	0.1392	-0.0955	0.2028	0.0546	0.1952
P28838	LAP3	Inflammation	1.0586	0.9892	-0.3125	0.0008	-1.4203	0.4209	-1.2132	-0.9558	-0.4351	-1.2694	-0.4832	-1.9626	0.3465	-0.609	0.2149	-0.7409	-0.5262	-0.6498	0.9716	0.3576	-0.5655	0.0552	0.3644	-0.7945	-0.2228	-0.6518	0.275	-0.1798	0.5361	-0.843	1.1979	-1.2224	-0.7311	-0.0008	0.1844	2.0619	-0.2453	0.9143	0.0363	0.3276	0.354	-0.908	0.0787	0.21	-0.046	0.3349	-0.2468
P28845	HSD11B1	Inflammation	0.6491	0.1544	-0.0914	0.322	0.2872	-0.0056	-0.3728	1.1482	-1.2741	0.2375	-0.6418	0.5766	0.0626	-0.0159	-0.6347	-0.1658	0.1107	-0.8876	-0.2254	-0.7408	0.1818	-0.7355	-0.1279	-0.2037	0.3398	-0.249	-0.7208	0.1882	0.4886	0.507	-0.1543	0.5828	-0.2703	0.2254	-1.1225	0.9855	-0.4253	0.0458	-0.2332	-0.5645	-1.1983	-0.6051	0.2912	-1.1968	-0.0411	0.8165	-0.937
P28906	CD34	Neurology	-0.0822	0.01	-0.1865	0.0509	0.7663	-0.1486	0.1019	-0.3756	-0.6128	0.0718	0.0145	0.4165	-0.1242	-0.1195	-0.3733	-0.0633	0.3936	-0.6722	-0.3256	0.0596	-0.0558	-0.7027	-0.8053	-0.1767	0.6536	0.0102	-0.3377	-0.3327	0.5638	0.5124	-0.106	-0.01	0.0426	0.0943	-0.3646	0.0334	0.024	-0.2079	0.0481	-0.2834	-0.22	-0.6995	0.4213	0.0219	-0.4997	-0.1913	0.2229
P28907	CD38	Oncology	-0.2683	0.0302	0.1997	-0.0004	0.3518	0.3839	-0.3987	-0.5262	-0.846	-0.8557	0.0839	0.29	0.0739	-0.2822	-0.035	0.0505	-0.106	-0.5957	0.121	-0.4422	-1.1614	0.1553	-0.4302	-0.7539	0.6296	0.9461	0.4507	0.0109	1.0476	2.0851	0.1395	-0.8157	-0.4943	0.1636	-0.1403	-0.0865	0.2585	-0.2213	-0.3675	-0.9372	-0.779	-0.1939	0.1816	-0.058	0.6159	0.1758	-0.0998
P28908	TNFRSF8	Neurology	-0.7146	-0.3117	-0.3996	-0.5229	0.1549	0.07	-0.8976	0.4287	-0.3545	0.5363	-0.2382	-0.14	0.4073	-0.1277	0.1646	-1.8408	0.398	-1.2724	1.1989	-0.2748	0.02	1.3478	-0.1528	-1.2047	0.2206	1.5368	-0.097	0.5415	0.5179	1.296	0.6665	0.6897	-0.3145	0.7407	-0.5263	0.5335	0.0087	-1.1083	0.0931	-1.1383	-0.7695	-0.1101	-0.1903	0.0641	1.5361	0.5769	0.0809
P29017	CD1C	Oncology	0.1672	0.4485	0.4815	-0.1566	0.5707	-0.1079	0.0423	-0.1488	0.0209	0.4656	-0.1885	0.4313	-0.149	-0.1407	-0.1161	0.1075	0.2245	-0.2346	-0.7996	-0.0165	0.1813	-1.2334	-0.233	-0.4267	-0.2394	-0.4836	0.0239	-0.2766	0.2736	-0.0904	-0.3157	0.2367	0.0791	0.2559	-0.4033	0.0914	-0.1031	-0.1541	0.3495	-0.1344	0.0165	-0.9978	-0.0572	-0.0261	-0.2092	0.4869	0.3109
P29218	IMPA1	Neurology	1.2168	0.5345	-0.1777	0.6953	0.5037	0.989	-0.0702	0.0315	0.2303	-0.2604	0.0194	-0.1212	0.1049	-0.0363	0.2391	-0.0236	-0.3602	-0.6505	0.8216	-0.2908	-0.3903	-0.5813	-0.2853	-0.2967	-0.101	-0.4235	-0.0275	0.1309	0.709	-0.1784	0.6098	0.1664	0.1858	-0.5288	0.3205	2.6159	0.6773	2.3135	-0.4668	-0.0726	-0.2041	-0.2134	-0.0515	-0.0565	0.485	-0.2722	-0.1941
P29279	CCN2	Inflammation	0.4983	0.9085	-0.0221	-0.5338	-0.1023	-0.277	-0.3292	0.069	-0.3644	-0.2752	-0.3193	0.851	-0.2936	-0.174	-0.2583	-0.2127	-0.5412	-0.955	0.7589	-0.4046	-0.1462	0.461	-0.4761	-0.5368	-0.0703	0.5914	-0.1306	0.4645	0.783	1.1688	0.0093	-0.6545	-0.5226	0.284	1.5901	0.6053	0.4597	0.8136	-0.4659	0.1445	0.8376	-0.4858	-0.0028	-0.4852	0.9685	-0.2507	-0.4475
P29317	EPHA2	Oncology	-0.5397	-0.2884	0.0405	-0.2233	0.731	0.3969	-0.2198	0.5492	-0.7854	0.1111	0.2851	0.4976	0.7299	0.4066	-0.3236	-0.1475	-0.3837	-1.189	0.6055	-0.4628	-0.7362	2.4757	0.6621	-0.6528	0.4449	2.0925	0.1888	0.2829	1.0756	2.592	-0.0953	0.8323	-0.1742	0.3754	-0.3445	0.6494	0.1605	-0.3084	0.1582	-0.4834	-0.2721	0.0994	-0.0953	-0.3031	1.3624	0.37	-0.4489
P29350	PTPN6	Inflammation	3.0975	1.2849	-0.722	2.0396	1.5274	2.0709	-1.1093	0.2711	-0.2218	-1.3519	-1.059	0.2605	0.1492	-0.584	0.176	-1.1988	-1.0269	-0.7528	0.2674	-0.7495	-1.6165	-1.2376	-0.7252	-0.099	-0.4646	-0.4929	0.0443	-0.0956	1.049	0.1668	0.7503	-1.0481	0.7826	1.313	2.473	1.3332	0.1779	3.9558	-1.3967	0.7948	0.4588	-1.208	0.3915	-1.1692	1.1165	-1.0631	-0.7709
P29353	SHC1	Oncology_II	-0.2914	-0.0632	1.244	0.149	0.3417	-1.4841	-0.946	0.1412	0.8668	-1.0102	1.9174	-1.3837	-0.5047	-0.3503	0.0589	-0.6915	-0.8373	-0.3965	1.0612	-0.8726	1.0136	0.6034	-0.3418	-1.7457	0.0733	-1.2736	-1.58	0.7747	-0.1144	0.0741	-0.0568	2.1592	0.9034	-4.0732	1.2049	-0.1471	3.0219	1.127	1.1401	-0.6865	-0.0243	0.6206	-0.4448	0.8339	-0.1545	0.1093	-0.986
P29377	S100G	Neurology_II	-0.3611	1.1054	0.1011	-0.2053	0.1689	1.4564	-0.179	-1.6808	0.4663	-0.0777	0.9937	0.3473	0.2655	-0.4429	-0.015	2.4856	0.0475	-0.3703	-0.2841	-0.7655	-0.1629	2.3711	-0.1835	-1.1909	1.6805	0.4029	1.2886	-0.1933	0.3144	2.2681	-0.591	0.59	-0.1175	0.0419	-0.5481	-1.2914	0.5403	-0.8017	-0.7522	-0.617	0.3375	-0.6975	0.5077	-0.8963	2.1866	0.5645	-1.1177
P29459_P29460	IL12A_IL12B	Oncology	0.536	-0.2768	-0.4054	1.0575	-0.1743	-0.3737	1.4454	1.4905	-0.6184	-0.0136	-0.3128	0.187	1.3604	-0.0381	1.057	-1.0494	-0.0629	-1.1322	-0.2997	0.7297	1.3062	-1.0779	-1.2109	-0.6745	0.2034	3.0131	0.208	0.8739	1.6798	2.826	1.2039	-0.4829	0.2239	0.8895	-0.0655	1.8174	0.8599	-0.4461	0.0595	-1.0478	-0.4232	-0.824	-0.4613	-0.1003	1.1096	0.9052	0.1422
P29460	IL12B	Inflammation	0.5906	-0.2598	-0.4896	0.8462	-0.1729	-0.4134	1.1601	1.2542	-0.5242	0.0237	-0.1566	0.0868	1.0298	-0.1587	0.7673	-0.9623	-0.0768	-0.8592	-0.3213	0.4729	1.1297	-1.0929	-1.2649	-0.4576	0.4482	2.3082	0.2079	0.5451	1.3655	2.0668	0.9333	-0.0329	0.2413	0.727	-0.2339	1.3783	0.7068	-0.5313	0.0375	-0.4975	-0.6191	-0.9903	-0.3089	0.0009	0.9933	0.5775	-0.0316
P29466	CASP1	Neurology	-0.6462	-0.0915	-1.1471	1.1118	0.4309	0.392	-0.9332	-1.0376	-1.2161	0.4316	-0.7098	-1.0504	-1.2842	-0.807	0.9282	-1.5073	0.6168	-0.4479	0.7834	0.188	0.2059	-0.1163	-0.1601	0.1585	-1.7973	0.5146	-0.9155	-0.1511	0.7496	1.2213	4.3355	0.9925	-1.3999	-1.3933	0.4321	0.496	0.6413	0.2951	-0.1543	-2.4866	0.1682	-0.3351	1.0229	-0.0099	0.0099	0.3735	-0.9803
P29474	NOS3	Neurology	-0.457	-0.0923	0.2311	-0.4756	1.3897	-0.0515	-0.9406	0.6153	0.2983	0.0925	-0.6146	-0.3164	1.0104	-0.0146	-0.3386	-0.6675	0.0408	-0.6765	2.0723	0.3931	-1.0545	2.7221	2.3437	0.0436	-0.0786	1.0529	0.8753	1.5642	1.0049	0.0966	0.1967	-1.0167	-0.0412	-0.5233	1.1425	0.5863	0.9265	-0.2922	0.2122	-0.5853	-0.0546	-0.0768	0.5433	0.329	1.5033	-0.5197	1.1245
P29475	NOS1	Neurology	-0.6937	0.5844	0.0216	-0.8439	0.5891	0.6331	-0.6909	0.9124	-0.8336	-0.0868	-0.3399	-0.0133	-0.5211	0.2661	-0.9352	0.3799	-0.4185	1.0305	1.9392	-0.2927	-0.4608	3.0754	0.6939	-1.1342	0.7309	1.7438	1.0371	2.7041	1.3013	3.3077	1.6808	0.1044	-0.2334	-0.3975	-0.1348	1.5494	1.1405	-0.6542	-0.3162	-1.3244	0.0609	0.3831	-0.4785	0.7501	-0.422	-0.6446	-0.1911
P29536	LMOD1	Cardiometabolic_II	-0.909	-0.1093	0.4454	-0.2915	1.3627	0.5035	-0.207	0.2711	-0.6071	0.1117	0.2979	0.4327	-0.0625	0.6365	-0.2259	0.025	-0.5	-0.8349	1.1677	-0.3735	-1.0595	1.0154	0.4902	-0.719	0.259	1.4206	0.7246	0.6024	1.8125	3.0637	0.1483	1.4397	-0.4037	-0.2002	-0.5784	0.7349	0.5672	-0.2979	-0.4923	-0.2111	-0.4667	0.171	0.1113	-0.3277	0.4831	0.5779	-0.5015
P29536	LMOD1	Inflammation_II	-1.1111	-0.3539	0.1911	-0.3066	0.8572	0.3944	-0.3459	0.5013	-0.7379	0.2494	-0.0588	0.4288	0.0533	0.5129	-0.3406	-0.0812	-0.8082	-1.0366	0.9857	-0.6306	-1.3167	0.9781	0.9472	-1.0047	0.1411	1.3696	0.6394	0.3247	1.8421	2.9281	-0.1252	1.193	-0.7476	0.4481	-0.4058	0.7061	0.2501	-0.2318	-0.4518	-0.7832	-0.4713	0.115	0.0456	-0.4602	0.4177	0.2834	-0.6915
P29536	LMOD1	Neurology_II	-0.8907	-0.0125	0.4449	-0.1868	1.103	0.4586	-0.256	0.2794	-0.6353	0.0645	0.2865	0.4305	-0.1115	0.5684	-0.0998	-0.0838	-0.7273	-0.9648	1.0852	-0.4746	-1.2715	0.9532	0.2465	-0.8765	0.1226	1.2148	0.7377	0.4141	1.7691	2.8893	-0.0554	1.3308	-0.5017	-0.1931	-0.4117	0.7123	0.4858	-0.1216	-0.3972	-0.4754	-0.3502	0.184	-0.0223	-0.3776	0.4382	0.5703	-0.5619
P29536	LMOD1	Oncology_II	-0.6105	-0.2223	0.2677	-0.2253	1.3317	0.5112	-0.4207	0.2479	-0.6744	0.434	0.1732	0.4566	-0.0662	0.6108	-0.0201	-0.244	-0.3861	-0.9061	1.2916	-0.4669	-1.0891	0.7233	0.4134	-0.6858	0.3023	1.4272	0.7056	0.4311	1.7329	2.8972	0.3012	1.3404	-0.2484	-0.1823	-0.4627	0.7805	0.3324	-0.12	-0.335	-0.4502	-0.3847	0.0235	0.2711	-0.2506	0.5328	0.6444	-0.5549
P29622	SERPINA4	Inflammation_II	0.088	0.3373	0.3084	0.0738	0.2703	0.2048	0.379	0.3151	-0.2584	0.3252	0.1819	-0.1932	-0.6267	-0.3262	-0.6327	-0.3839	0.0874	-0.3693	-1.6092	-0.3852	0.0159	-1.5518	1.264	-0.1355	0.5724	-0.2372	0.0147	-0.0951	0.4346	0.1451	0.1039	-0.3485	-0.2542	-0.4457	-0.0282	-0.2563	0.3697	0.2576	0.1066	-0.1109	0.4205	-0.0754	-0.3552	-0.2438	-0.3381	-0.5539	0.1407
P29692	EEF1D	Cardiometabolic_II	-0.2793	0.1165	-0.7596	-0.7475	0.1877	1.0494	-1.9157	0.5798	-0.1806	-0.9675	-0.5323	0.4233	0.2484	-0.9199	0.5464	0.2617	-1.6742	-1.4652	2.6683	0.4984	-1.0759	2.2083	-1.184	0.2902	-0.0924	0.8076	0.47	-0.0889	1.94	0.5581	1.6016	-0.6707	-1.618	-0.4608	1.1368	4.3395	0.1356	2.4803	-1.3084	-0.9046	0.354	-0.0107	-0.803	-0.0688	2.9537	-0.489	-0.5192
P29965	CD40LG	Inflammation	2.1175	0.4188	-0.4696	1.2714	0.56	1.1511	0.0414	0.3108	-0.3858	-0.1434	-0.1518	0.5041	0.2216	0.0046	-0.1656	-0.9268	-0.4815	-0.6864	0.4356	-0.1305	-0.7565	-0.0777	-0.4748	-0.2838	0.2488	0.0097	-0.0905	-0.2742	0.895	0.0044	0.5096	-0.0325	0.0738	-0.1208	1.8967	-0.3009	-0.0044	3.072	-0.7279	0.7105	0.7521	-0.7367	-0.0331	-0.2832	0.7607	-0.3386	-0.6582
P30039	PBLD	Neurology	0.068	0.013	0.3056	0.3395	-0.3609	-0.0399	-0.3013	-0.3949	-0.3759	0.3627	0.1605	-0.584	-0.1702	0.4216	0.4813	0.3313	0.0813	-0.0331	-1.0129	0.1446	-0.2894	0.1296	-0.013	-1.0607	0.0376	-0.5756	-0.3782	-0.8193	-0.6552	0.7848	-0.5997	0.0188	0.9288	-0.2793	0.7561	1.3255	0.5212	1.4387	0.1776	-1.3466	-0.5481	-0.3556	-0.5645	0.2224	0.2014	-0.1783	-0.4387
P30040	ERP29	Inflammation_II	2.34	0.5546	-0.9145	0.9419	1.9207	0.1555	-0.9018	1.7204	-0.0309	-0.0184	0.005	0.7877	0.6815	-0.762	0.5803	-1.1364	-0.6641	-0.087	0.5584	-0.6359	-1.0493	-0.0413	0.4196	-0.3908	0.614	0.2429	0.1589	0.1182	1.6367	-0.1409	0.4376	-1.1773	-0.6794	-0.1783	3.2454	2.3098	-0.0573	4.5724	0.0357	1.1018	0.5257	-0.005	-1.075	-0.2807	2.0968	-0.4143	-0.5096
P30041	PRDX6	Oncology	0.5221	-0.008	-0.3951	0.0579	-0.6274	0.3381	-1.3249	0.0041	-0.0331	-0.1912	0.2466	-0.2399	-0.8689	-0.2244	0.4438	0.4279	0.8904	-0.6899	1.0686	1.0532	-0.7639	0.0786	0.511	-0.6757	-0.1038	0.2593	-0.44	0.1055	0.6759	0.5909	1.698	0.2928	-0.9638	-0.93	-1.2866	-0.4358	2.1152	-0.1146	-0.7216	-0.8358	1.8316	-1.3508	0.9969	-0.1863	-0.6222	0.8065	-0.0041
[truncated: 1,846 more rows]
[truncated: 583 more columns]
