# Supplementary material for: Multidimensional proteomics and explainable AI feature selection identify cross-platform lung cancer molecular signature in blood plasma
Source: Research Square preprint supplement (doi:10.21203/rs.3.rs-7660411/v1), 2025-10-31
Supplement: Supplementary file 2 [file 12a1ee133d5db6c99588812b.xlsx]

## Sheet: HRF_202509151717_labelled_data
Sample ID	Split	Sex	Histology	Clinical morphology	Stage
OX_CF_00002	train	Female	Control	Control	Control
OX_CF_00003	train	Male	Control	Control	Control
OX_CF_00004	train	Female	Control	Control	Control
OX_CF_00005	train	Male	Control	Control	Control
OX_CF_00006	train	Female	Control	Control	Control
OX_CF_00007	train	Female	Control	Control	Control
OX_CF_00008	holdout	Female	Control	Control	Control
OX_CF_00009	train	Female	Control	Control	Control
OX_CF_00010	train	Female	Control	Control	Control
OX_CF_00011	train	Female	Control	Control	Control
OX_CF_00012	train	Male	Control	Control	Control
OX_CF_00013	holdout	Male	Control	Control	Control
OX_CF_00014	train	Female	Control	Control	Control
OX_CF_00015	train	Male	Control	Control	Control
OX_CF_00016	train	Female	Control	Control	Control
OX_CF_00018	train	Female	Control	Control	Control
OX_CF_00019	train	Male	Control	Control	Control
OX_CF_00020	train	Male	Control	Control	Control
OX_CF_00021	holdout	Male	Control	Control	Control
OX_CF_00022	holdout	Male	Control	Control	Control
OX_CF_00023	train	Male	Control	Control	Control
OX_CF_00024	holdout	Male	Control	Control	Control
OX_CF_00025	holdout	Female	Control	Control	Control
OX_CF_00026	train	Female	Control	Control	Control
OX_CF_00027	holdout	Female	Control	Control	Control
OX_CF_00028	train	Female	Control	Control	Control
OX_CF_00029	train	Female	Control	Control	Control
OX_CF_00030	train	Male	Control	Control	Control
OX_CF_00031	train	Female	Control	Control	Control
OX_CF_00032	train	Female	Control	Control	Control
OX_CF_00033	train	Male	Control	Control	Control
OX_CF_00034	train	Male	Control	Control	Control
OX_CF_00035	train	Male	Control	Control	Control
OX_CF_00036	train	Male	Control	Control	Control
OX_CF_00037	train	Male	Control	Control	Control
OX_CF_00038	train	Male	Control	Control	Control
OX_CF_00039	holdout	Female	Control	Control	Control
OX_CF_00040	train	Male	Control	Control	Control
OX_CF_00041	train	Female	Control	Control	Control
OX_CF_00042	train	Female	Control	Control	Control
OX_CF_00043	train	Female	Control	Control	Control
OX_CF_00044	train	Female	Control	Control	Control
OX_CF_00045	train	Female	Control	Control	Control
OX_CF_00046	train	Male	Control	Control	Control
OX_CF_00047	train	Male	Control	Control	Control
OX_CF_00048	train	Female	Control	Control	Control
OX_CF_00049	holdout	Female	Control	Control	Control
OX_CF_00050	train	Female	Control	Control	Control
OX_CF_00051	train	Male	Control	Control	Control
OX_CF_00052	train	Female	Control	Control	Control
OX_CF_00053	train	Female	Control	Control	Control
OX_CF_00054	train	Male	Control	Control	Control
OX_CF_00055	train	Female	Control	Control	Control
OX_CF_00056	train	Female	Control	Control	Control
OX_CF_00057	train	Male	Control	Control	Control
OX_CF_00058	train	Female	Control	Control	Control
OX_CF_00059	train	Female	Control	Control	Control
OX_CF_00060	holdout	Female	Control	Control	Control
OX_CF_00061	train	Female	Control	Control	Control
OX_CF_00062	holdout	Male	Control	Control	Control
OX_CF_00063	train	Male	Control	Control	Control
OX_CF_00066	train	Female	Control	Control	Control
OX_CF_00067	holdout	Male	Control	Control	Control
OX_CF_00068	train	Female	Control	Control	Control
OX_CF_00069	holdout	Female	Control	Control	Control
OX_CF_00070	train	Male	Control	Control	Control
OX_CF_00071	train	Male	Control	Control	Control
OX_CF_00072	train	Male	Control	Control	Control
OX_CF_00073	train	Male	Control	Control	Control
OX_CF_00074	train	Male	Control	Control	Control
OX_CF_00075	train	Male	Control	Control	Control
OX_CF_00076	holdout	Male	Control	Control	Control
OX_CF_00077	holdout	Female	Control	Control	Control
OX_CF_00078	train	Male	Control	Control	Control
OX_CF_00079	holdout	Female	Control	Control	Control
OX_CF_00080	train	Male	Control	Control	Control
OX_CF_00081	train	Male	Control	Control	Control
OX_CF_00082	holdout	Male	Control	Control	Control
OX_CF_00083	train	Male	Control	Control	Control
OX_CF_00084	train	Male	Control	Control	Control
OX_CF_00086	train	Female	Control	Control	Control
OX_CF_00087	train	Female	Control	Control	Control
OX_CF_00088	train	Male	Control	Control	Control
OX_CF_00089	train	Female	Control	Control	Control
OX_CF_00090	holdout	Female	Control	Control	Control
OX_CF_00091	train	Female	Control	Control	Control
OX_CF_00092	train	Male	Control	Control	Control
OX_CF_00093	train	Male	Control	Control	Control
OX_CF_00094	train	Male	Control	Control	Control
OX_CF_00095	train	Female	Control	Control	Control
OX_CF_00096	train	Male	Control	Control	Control
OX_CF_00097	train	Female	Control	Control	Control
OX_CF_00098	train	Female	Control	Control	Control
OX_CF_00099	holdout	Female	Control	Control	Control
OX_CF_00100	train	Female	Control	Control	Control
OX_CF_00101	train	Female	Control	Control	Control
OX_CF_00102	train	Female	Control	Control	Control
OX_CF_00103	train	Male	Control	Control	Control
OX_CF_00104	train	Female	Control	Control	Control
OX_CF_00105	train	Male	Control	Control	Control
OX_CF_00106	train	Female	Control	Control	Control
OX_CF_00107	train	Female	Control	Control	Control
OX_CF_00108	train	Female	Control	Control	Control
OX_CF_00109	train	Female	Control	Control	Control
OX_CF_00110	train	Female	Control	Control	Control
OX_CF_00111	holdout	Male	Control	Control	Control
OX_CF_00112	train	Male	Control	Control	Control
OX_CF_00113	train	Male	Control	Control	Control
OX_CF_00114	holdout	Male	Control	Control	Control
OX_CF_00115	train	Male	Control	Control	Control
OX_CF_00116	train	Female	Control	Control	Control
OX_CF_00117	train	Male	Control	Control	Control
OX_CF_00118	train	Male	Control	Control	Control
OX_CF_00120	holdout	Male	Control	Control	Control
OX_CF_00121	holdout	Female	Control	Control	Control
OX_CF_00123	train	Female	Control	Control	Control
OX_CF_00124	holdout	Female	Control	Control	Control
OX_LC_00001	train	Male	NSCLC	LUAD	Late lung cancer
OX_LC_00002	train	Male	NSCLC	Other NSCLC	Early lung cancer
OX_LC_00003	holdout	Female	NSCLC	LUAD	Late lung cancer
OX_LC_00004	train	Male	SCLC	SCLC	Late lung cancer
OX_LC_00005	train	Male	NSCLC	LUAD	Late lung cancer
OX_LC_00006	holdout	Male	NSCLC	LUSC	Late lung cancer
OX_LC_00007	train	Male	SCLC	SCLC	Early lung cancer
OX_LC_00008	holdout	Female	NSCLC	LUAD	Early lung cancer
OX_LC_00009	train	Female	NSCLC	Other NSCLC	Early lung cancer
OX_LC_00010	train	Male	NSCLC	LUSC	Early lung cancer
OX_LC_00011	train	Female	SCLC	SCLC	Late lung cancer
OX_LC_00013	train	Male	NSCLC	LUAD	Late lung cancer
OX_LC_00014	train	Female	NSCLC	LUAD	Late lung cancer
OX_LC_00015	train	Male	NSCLC	Other NSCLC	Early lung cancer
OX_LC_00016	train	Male	NSCLC	LUAD	Early lung cancer
OX_LC_00017	train	Female	NSCLC	LUAD	Late lung cancer
OX_LC_00018	holdout	Male	NSCLC	LUSC	Late lung cancer
OX_LC_00019	train	Male	NSCLC	LUSC	Late lung cancer
OX_LC_00020	train	Female	NSCLC	LUAD	Late lung cancer
OX_LC_00021	train	Male	SCLC	SCLC	Late lung cancer
OX_LC_00022	train	Male	NSCLC	LUAD	Late lung cancer
OX_LC_00023	train	Female	NSCLC	LUSC	Late lung cancer
OX_LC_00024	train	Male	NSCLC	LUSC	Early lung cancer
OX_LC_00026	train	Male	SCLC	SCLC	Late lung cancer
OX_LC_00027	holdout	Male	NSCLC	LUSC	Early lung cancer
OX_LC_00028	train	Female	NSCLC	LUAD	Late lung cancer
OX_LC_00029	train	Male	NSCLC	LUSC	Late lung cancer
OX_LC_00030	holdout	Female	NSCLC	LUAD	Early lung cancer
OX_LC_00031	train	Male	NSCLC	LUSC	Late lung cancer
OX_LC_00032	train	Male	NSCLC	LUSC	Early lung cancer
OX_LC_00033	train	Female	NSCLC	LUAD	Late lung cancer
OX_LC_00034	train	Male	SCLC	SCLC	Late lung cancer
OX_LC_00035	train	Male	SCLC	SCLC	Late lung cancer
OX_LC_00036	train	Female	NSCLC	Other NSCLC	Late lung cancer
OX_LC_00037	holdout	Female	NSCLC	LUAD	Late lung cancer
OX_LC_00038	train	Female	NSCLC	LUAD	Late lung cancer
OX_LC_00039	train	Male	NSCLC	LUAD	Early lung cancer
OX_LC_00040	train	Male	NSCLC	Other NSCLC	Early lung cancer
OX_LC_00041	train	Male	NSCLC	LUAD	Late lung cancer
OX_LC_00042	train	Male	NSCLC	LUSC	Late lung cancer
OX_LC_00043	train	Male	NSCLC	LUAD	Late lung cancer
OX_LC_00044	holdout	Male	NSCLC	LUAD	Early lung cancer
OX_LC_00045	train	Male	NSCLC	Other NSCLC	Early lung cancer
OX_LC_00046	train	Male	NSCLC	LUAD	Late lung cancer
OX_LC_00048	train	Female	NSCLC	LUAD	Early lung cancer
OX_LC_00049	train	Male	NSCLC	LUAD	Late lung cancer
OX_LC_00050	holdout	Female	NSCLC	LUAD	Early lung cancer
OX_LC_00051	train	Female	NSCLC	LUAD	Late lung cancer
OX_LC_00052	train	Female	NSCLC	LUSC	Late lung cancer
OX_LC_00053	train	Male	NSCLC	LUAD	Late lung cancer
OX_LC_00054	train	Male	NSCLC	LUAD	Late lung cancer
OX_LC_00055	train	Male	NSCLC	LUAD	Early lung cancer
OX_LC_00056	train	Male	NSCLC	LUAD	Late lung cancer
OX_LC_00057	train	Male	NSCLC	Other NSCLC	Late lung cancer
OX_LC_00059	train	Female	SCLC	SCLC	Late lung cancer
OX_LC_00060	train	Female	NSCLC	Other NSCLC	Early lung cancer
OX_LC_00061	holdout	Female	NSCLC	LUAD	Late lung cancer
OX_LC_00062	train	Male	NSCLC	LUAD	Early lung cancer
OX_LC_00063	train	Male	NSCLC	LUAD	Late lung cancer
OX_LC_00064	train	Female	NSCLC	LUAD	Early lung cancer
OX_LC_00065	train	Female	NSCLC	LUAD	Late lung cancer
OX_LC_00066	train	Female	NSCLC	LUAD	Early lung cancer
OX_LC_00067	holdout	Male	NSCLC	LUAD	Late lung cancer
OX_LC_00068	train	Male	NSCLC	LUAD	Early lung cancer
OX_LC_00069	train	Male	SCLC	SCLC	Late lung cancer
OX_LC_00070	train	Female	NSCLC	LUAD	Early lung cancer
OX_LC_00071	train	Female	NSCLC	Other NSCLC	Early lung cancer
OX_LC_00072	train	Female	NSCLC	Other NSCLC	Late lung cancer
OX_LC_00073	holdout	Female	NSCLC	LUAD	Early lung cancer
OX_LC_00074	train	Female	NSCLC	LUAD	Late lung cancer
OX_LC_00075	train	Female	NSCLC	LUAD	Late lung cancer
OX_LC_00076	train	Male	NSCLC	LUAD	Late lung cancer
OX_LC_00077	train	Female	NSCLC	LUAD	Early lung cancer
OX_LC_00078	train	Male	NSCLC	LUSC	Early lung cancer
OX_LC_00079	train	Male	NSCLC	Other NSCLC	Late lung cancer
OX_LC_00080	train	Male	NSCLC	LUAD	Early lung cancer
OX_LC_00081	holdout	Male	NSCLC	LUAD	Early lung cancer
OX_LC_00082	train	Female	NSCLC	LUAD	Late lung cancer
OX_LC_00083	holdout	Male	NSCLC	LUAD	Late lung cancer
OX_LC_00084	train	Male	NSCLC	LUSC	Early lung cancer
OX_LC_00085	train	Male	NSCLC	LUSC	Early lung cancer
OX_LC_00086	train	Female	SCLC	SCLC	Late lung cancer
OX_LC_00087	train	Female	NSCLC	LUAD	Late lung cancer
OX_LC_00088	holdout	Male	SCLC	SCLC	Late lung cancer
OX_LC_00089	train	Male	NSCLC	LUAD	Early lung cancer
OX_LC_00090	holdout	Male	NSCLC	Other NSCLC	Early lung cancer
OX_LC_00091	train	Male	NSCLC	LUSC	Early lung cancer
OX_LC_00092	holdout	Male	NSCLC	LUSC	Late lung cancer
OX_LC_00093	holdout	Female	NSCLC	LUAD	Late lung cancer
OX_LC_00094	train	Female	NSCLC	LUAD	Late lung cancer
OX_LC_00095	train	Male	NSCLC	LUAD	Late lung cancer
OX_LC_00096	train	Male	NSCLC	LUSC	Late lung cancer
OX_LC_00097	train	Female	NSCLC	LUAD	Late lung cancer
OX_LC_00098	train	Male	NSCLC	LUSC	Late lung cancer
OX_LC_00099	train	Female	NSCLC	Other NSCLC	Late lung cancer
OX_LC_00100	train	Female	SCLC	Other NSCLC	Early lung cancer
OX_LC_00101	holdout	Female	NSCLC	Other NSCLC	Late lung cancer
OX_LC_00102	train	Male	NSCLC	LUAD	Late lung cancer
OX_LC_00103	train	Female	NSCLC	LUSC	Late lung cancer
OX_LC_00104	holdout	Male	NSCLC	LUAD	Late lung cancer
OX_LC_00105	holdout	Female	NSCLC	LUSC	Late lung cancer
OX_LC_00106	train	Male	NSCLC	LUAD	Late lung cancer
OX_LC_00107	train	Male	NSCLC	LUAD	Late lung cancer
OX_LC_00108	train	Male	NSCLC	LUAD	Late lung cancer
OX_LC_00109	train	Male	SCLC	SCLC	Late lung cancer
OX_LC_00110	train	Female	NSCLC	LUSC	Early lung cancer
OX_LC_00112	holdout	Male	NSCLC	LUSC	Late lung cancer
OX_LC_00114	train	Male	NSCLC	Other NSCLC	Early lung cancer
OX_LC_00115	train	Female	SCLC	SCLC	Late lung cancer
OX_LC_00116	train	Female	NSCLC	LUAD	Early lung cancer
OX_LC_00117	train	Male	NSCLC	LUSC	Late lung cancer
OX_LC_00118	train	Male	NSCLC	LUAD	Early lung cancer
OX_LC_00119	train	Male	NSCLC	LUSC	Late lung cancer
OX_LC_00120	train	Female	NSCLC	LUAD	Late lung cancer
OX_LC_00121	train	Male	NSCLC	LUAD	Late lung cancer
OX_LC_00122	train	Male	NSCLC	LUAD	Late lung cancer
OX_LC_00124	train	Female	NSCLC	LUAD	Early lung cancer
OX_LC_00125	train	Female	NSCLC	LUAD	Late lung cancer
OX_LC_00126	train	Male	SCLC	SCLC	Late lung cancer
OX_LC_00127	train	Male	NSCLC	LUSC	Early lung cancer
OX_LC_00128	holdout	Female	NSCLC	LUAD	Early lung cancer
OX_LC_00129	train	Female	NSCLC	LUAD	Late lung cancer
OX_LC_00130	train	Male	SCLC	SCLC	Late lung cancer
OX_LC_00131	train	Female	NSCLC	LUAD	Early lung cancer
OX_LC_00132	train	Female	NSCLC	LUAD	Late lung cancer
OX_LC_00133	train	Male	NSCLC	LUAD	Early lung cancer
OX_LC_00135	train	Male	NSCLC	LUAD	Late lung cancer
OX_LC_00136	train	Male	NSCLC	LUSC	Late lung cancer
OX_LC_00138	train	Female	NSCLC	LUSC	Late lung cancer
OX_LC_00139	holdout	Female	NSCLC	Other NSCLC	Late lung cancer
OX_LC_00140	train	Male	NSCLC	LUSC	Early lung cancer
OX_LC_00141	train	Female	NSCLC	LUSC	Late lung cancer
OX_LC_00143	train	Male	NSCLC	LUAD	Early lung cancer
OX_LC_00144	holdout	Male	NSCLC	LUSC	Late lung cancer
OX_LC_00146	train	Female	NSCLC	LUAD	Late lung cancer
OX_LC_00147	holdout	Female	NSCLC	LUAD	Late lung cancer
OX_LC_00149	train	Male	NSCLC	LUAD	Late lung cancer
OX_LC_00150	train	Female	NSCLC	LUAD	Late lung cancer
OX_LC_00151	holdout	Female	NSCLC	LUAD	Late lung cancer
OX_LC_00152	holdout	Female	NSCLC	LUAD	Late lung cancer
OX_LC_00153	holdout	Male	NSCLC	LUAD	Early lung cancer
OX_LC_00154	train	Female	NSCLC	LUSC	Late lung cancer
OX_LC_00155	train	Male	SCLC	SCLC	Late lung cancer
OX_LC_00156	train	Female	NSCLC	Other NSCLC	Late lung cancer
OX_LC_00157	train	Female	NSCLC	LUSC	Late lung cancer
OX_LC_00158	holdout	Male	NSCLC	Other NSCLC	Late lung cancer
OX_LC_00159	train	Male	NSCLC	LUAD	Late lung cancer
OX_LC_00160	train	Female	NSCLC	LUAD	Late lung cancer
OX_LC_00162	train	Female	NSCLC	LUAD	Early lung cancer
OX_LC_00163	holdout	Male	NSCLC	LUAD	Early lung cancer
OX_LC_00164	train	Male	NSCLC	LUSC	Late lung cancer
OX_LC_00165	holdout	Male	NSCLC	LUSC	Late lung cancer
OX_LC_00166	holdout	Female	NSCLC	Other NSCLC	Early lung cancer
OX_LC_00168	holdout	Female	NSCLC	LUAD	Early lung cancer
OX_LC_00170	train	Female	NSCLC	LUAD	Early lung cancer
OX_LC_00171	train	Female	NSCLC	LUAD	Early lung cancer
OX_LC_00172	train	Male	SCLC	SCLC	Late lung cancer
OX_LC_00173	holdout	Male	NSCLC	LUSC	Early lung cancer
OX_LC_00174	holdout	Female	NSCLC	LUAD	Late lung cancer
OX_LC_00175	train	Male	SCLC	SCLC	Late lung cancer
OX_LC_00176	train	Male	NSCLC	Other NSCLC	Early lung cancer
OX_LC_00177	train	Female	NSCLC	LUSC	Late lung cancer
OX_LC_00178	train	Male	SCLC	SCLC	Late lung cancer
OX_LC_00179	holdout	Male	NSCLC	LUAD	Early lung cancer
OX_LC_00180	train	Female	NSCLC	LUAD	Early lung cancer
OX_LC_00181	train	Female	NSCLC	LUAD	Late lung cancer
OX_LC_00182	train	Female	NSCLC	LUAD	Early lung cancer
OX_LC_00183	holdout	Female	NSCLC	LUAD	Early lung cancer
OX_LC_00184	train	Male	NSCLC	Other NSCLC	Late lung cancer
OX_LC_00185	train	Male	NSCLC	LUSC	Early lung cancer
OX_LC_00187	holdout	Male	NSCLC	LUAD	Early lung cancer
OX_LC_00188	holdout	Male	NSCLC	LUSC	Late lung cancer
OX_LC_00189	holdout	Male	NSCLC	Other NSCLC	Early lung cancer
OX_LC_00191	train	Male	NSCLC	LUSC	Late lung cancer
OX_LC_00192	train	Male	SCLC	SCLC	Late lung cancer
OX_LC_00194	train	Female	NSCLC	LUAD	Late lung cancer
OX_LC_00195	holdout	Male	NSCLC	LUSC	Early lung cancer
OX_LC_00196	train	Male	NSCLC	LUSC	Late lung cancer
OX_LC_00197	train	Female	NSCLC	LUAD	Early lung cancer
OX_LC_00198	train	Female	NSCLC	LUAD	Late lung cancer
OX_LC_00199	train	Female	NSCLC	Other NSCLC	Late lung cancer
OX_LC_00200	train	Male	SCLC	SCLC	Late lung cancer
OX_LC_00201	train	Female	NSCLC	LUAD	Late lung cancer
OX_LC_00202	train	Male	NSCLC	Other NSCLC	Early lung cancer
OX_LC_00203	train	Female	SCLC	SCLC	Late lung cancer
OX_LC_00204	train	Female	NSCLC	LUAD	Early lung cancer
OX_LC_00205	train	Female	NSCLC	LUAD	Early lung cancer
OX_LC_00206	train	Female	NSCLC	LUSC	Early lung cancer
OX_LC_00207	train	Male	SCLC	SCLC	Late lung cancer
OX_LC_00208	train	Male	NSCLC	Other NSCLC	Late lung cancer
OX_LC_00209	train	Male	SCLC	SCLC	Late lung cancer
OX_LC_00210	train	Female	NSCLC	LUAD	Early lung cancer
OX_LC_00211	train	Male	NSCLC	LUSC	Late lung cancer
OX_LC_00212	train	Male	NSCLC	Other NSCLC	Early lung cancer
OX_LC_00213	train	Female	NSCLC	Other NSCLC	Early lung cancer
OX_LC_00214	train	Male	NSCLC	LUAD	Early lung cancer
OX_LC_00215	train	Female	NSCLC	LUAD	Early lung cancer
OX_LC_00216	train	Male	NSCLC	LUAD	Early lung cancer
OX_LC_00217	holdout	Male	NSCLC	LUSC	Late lung cancer
OX_LC_00218	holdout	Female	NSCLC	LUAD	Late lung cancer
OX_LC_00219	train	Male	NSCLC	LUSC	Early lung cancer
OX_LC_00220	train	Female	NSCLC	LUAD	Early lung cancer
OX_LC_00221	train	Female	NSCLC	LUSC	Late lung cancer
OX_LC_00222	train	Female	NSCLC	LUAD	Early lung cancer
OX_LC_00223	train	Male	NSCLC	LUSC	Late lung cancer
OX_LC_00224	train	Male	NSCLC	Other NSCLC	Early lung cancer
OX_LC_00225	train	Male	NSCLC	LUSC	Early lung cancer
OX_LC_00227	train	Female	NSCLC	LUAD	Early lung cancer
OX_LC_00228	holdout	Female	NSCLC	LUAD	Late lung cancer
OX_LC_00229	train	Male	SCLC	SCLC	Late lung cancer
OX_LC_00231	train	Female	SCLC	SCLC	Late lung cancer
OX_LC_00232	train	Female	NSCLC	LUSC	Late lung cancer
OX_LC_00233	train	Male	NSCLC	LUSC	Late lung cancer
OX_LC_00234	train	Male	SCLC	SCLC	Early lung cancer
OX_LC_00235	train	Male	NSCLC	LUSC	Early lung cancer
OX_LC_00236	train	Female	NSCLC	LUAD	Early lung cancer
OX_LC_00237	train	Male	NSCLC	LUSC	Late lung cancer
OX_LC_00238	train	Male	NSCLC	LUSC	Early lung cancer
OX_LC_00239	train	Male	NSCLC	LUAD	Early lung cancer
OX_LC_00240	train	Male	NSCLC	LUSC	Early lung cancer
OX_LC_00241	train	Male	NSCLC	Other NSCLC	Late lung cancer
OX_LC_00242	train	Male	NSCLC	Other NSCLC	Early lung cancer
OX_LC_00243	holdout	Male	NSCLC	LUAD	Late lung cancer
OX_LC_00244	holdout	Female	NSCLC	Other NSCLC	Late lung cancer
OX_LC_00245	holdout	Female	NSCLC	LUSC	Late lung cancer
OX_LC_00246	train	Male	NSCLC	LUSC	Early lung cancer
OX_LC_00247	holdout	Female	NSCLC	Other NSCLC	Late lung cancer
OX_LC_00248	holdout	Male	NSCLC	LUAD	Early lung cancer
OX_LC_00250	train	Female	NSCLC	LUAD	Early lung cancer
OX_LC_00251	train	Female	NSCLC	LUAD	Late lung cancer
OX_LC_00252	train	Male	NSCLC	LUAD	Early lung cancer
OX_LC_00254	train	Female	NSCLC	Other NSCLC	Late lung cancer
OX_LC_00255	train	Male	NSCLC	LUSC	Early lung cancer
OX_LC_00256	train	Male	NSCLC	LUAD	Early lung cancer
OX_LC_00257	train	Male	SCLC	SCLC	Late lung cancer
OX_LC_00258	holdout	Male	NSCLC	LUSC	Early lung cancer
OX_LC_00260	train	Male	NSCLC	LUSC	Late lung cancer
OX_LC_00261	train	Female	NSCLC	Other NSCLC	Late lung cancer
OX_LC_00262	train	Female	NSCLC	LUSC	Early lung cancer
OX_LC_00263	train	Male	NSCLC	LUAD	Early lung cancer
OX_LC_00264	train	Male	NSCLC	LUSC	Early lung cancer
OX_LC_00265	train	Female	NSCLC	LUAD	Early lung cancer
OX_LC_00266	train	Female	NSCLC	LUAD	Early lung cancer
OX_LC_00267	holdout	Male	NSCLC	LUAD	Late lung cancer
OX_LC_00268	holdout	Female	NSCLC	Other NSCLC	Early lung cancer
OX_LC_00269	train	Male	NSCLC	LUAD	Early lung cancer
OX_LC_00270	train	Male	NSCLC	LUAD	Late lung cancer
OX_LC_00271	train	Female	NSCLC	LUSC	Early lung cancer
OX_LC_00272	train	Female	NSCLC	LUSC	Early lung cancer
OX_LC_00273	train	Male	NSCLC	LUSC	Early lung cancer
OX_LC_00274	train	Male	NSCLC	LUAD	Early lung cancer
OX_LC_00275	train	Female	NSCLC	LUAD	Early lung cancer
OX_LC_00276	holdout	Male	SCLC	SCLC	Late lung cancer
OX_LC_00277	train	Male	NSCLC	LUAD	Early lung cancer
OX_LC_00278	holdout	Male	NSCLC	LUSC	Late lung cancer
OX_LC_00280	train	Male	NSCLC	LUAD	Late lung cancer
OX_LC_00281	train	Male	NSCLC	LUSC	Late lung cancer
OX_LC_00282	train	Female	NSCLC	LUAD	Late lung cancer
OX_LC_00283	train	Male	NSCLC	LUAD	Early lung cancer
OX_LC_00284	train	Male	NSCLC	LUAD	Early lung cancer
OX_LC_00285	train	Female	NSCLC	LUAD	Late lung cancer
OX_LC_00286	holdout	Female	NSCLC	LUAD	Early lung cancer
OX_LC_00287	holdout	Male	NSCLC	LUSC	Early lung cancer
OX_LC_00289	train	Male	NSCLC	LUAD	Early lung cancer
OX_LC_00290	train	Female	NSCLC	LUAD	Early lung cancer
OX_LC_00291	holdout	Male	NSCLC	LUAD	Early lung cancer
OX_LC_00292	train	Male	NSCLC	Other NSCLC	Early lung cancer
OX_LC_00293	train	Female	NSCLC	LUSC	Late lung cancer
OX_LC_00296	train	Female	NSCLC	LUAD	Late lung cancer
OX_LC_00297	train	Female	NSCLC	LUSC	Late lung cancer
OX_LC_00298	holdout	Female	NSCLC	LUAD	Early lung cancer
OX_LC_00299	train	Female	NSCLC	LUAD	Early lung cancer
OX_LC_00300	train	Male	NSCLC	LUSC	Late lung cancer
OX_LC_00301	holdout	Male	NSCLC	LUSC	Late lung cancer
OX_LC_00303	train	Male	NSCLC	Other NSCLC	Early lung cancer
OX_LC_00304	train	Male	NSCLC	Other NSCLC	Early lung cancer
OX_LC_00306	train	Male	NSCLC	LUSC	Late lung cancer
OX_LC_00307	train	Female	NSCLC	Other NSCLC	Late lung cancer
OX_LC_00308	train	Male	NSCLC	Other NSCLC	Late lung cancer
OX_LC_00309	train	Female	NSCLC	LUAD	Early lung cancer
OX_LC_00310	holdout	Female	SCLC	SCLC	Late lung cancer
OX_LC_00311	train	Female	NSCLC	LUSC	Late lung cancer
OX_LC_00312	train	Male	NSCLC	Other NSCLC	Late lung cancer
OX_LC_00313	train	Female	NSCLC	LUAD	Late lung cancer
OX_LC_00314	train	Male	NSCLC	Other NSCLC	Early lung cancer
OX_LC_00315	holdout	Female	NSCLC	LUAD	Early lung cancer
OX_LC_00316	train	Female	NSCLC	LUSC	Early lung cancer
OX_LC_00317	train	Female	NSCLC	Other NSCLC	Early lung cancer
OX_LC_00318	train	Female	NSCLC	LUSC	Late lung cancer
OX_LC_00319	train	Female	NSCLC	LUAD	Late lung cancer
OX_LC_00320	train	Female	NSCLC	LUAD	Early lung cancer
OX_LC_00321	train	Male	NSCLC	LUAD	Early lung cancer
OX_LC_00322	holdout	Female	SCLC	SCLC	Late lung cancer
OX_LC_00323	holdout	Female	NSCLC	LUAD	Early lung cancer
OX_LC_00325	train	Male	NSCLC	LUAD	Early lung cancer
OX_LC_00326	train	Female	NSCLC	LUAD	Early lung cancer
OX_LC_00327	train	Female	SCLC	SCLC	Late lung cancer
OX_LC_00328	train	Male	NSCLC	LUAD	Early lung cancer
OX_LC_00329	train	Male	NSCLC	LUAD	Late lung cancer
OX_LC_00330	train	Female	NSCLC	Other NSCLC	Early lung cancer
OX_LC_00331	train	Female	SCLC	SCLC	Early lung cancer
OX_LC_00332	train	Female	SCLC	SCLC	Late lung cancer
OX_LC_00333	holdout	Male	NSCLC	LUAD	Late lung cancer
OX_LC_00334	train	Male	NSCLC	LUSC	Late lung cancer
OX_LC_00335	train	Male	SCLC	SCLC	Late lung cancer
OX_LC_00336	train	Female	NSCLC	LUAD	Early lung cancer
OX_LC_00339	train	Male	NSCLC	LUAD	Early lung cancer
OX_LC_00340	train	Male	NSCLC	LUAD	Early lung cancer
OX_LC_00341	train	Female	NSCLC	LUAD	Early lung cancer
OX_LC_00342	train	Male	NSCLC	LUAD	Early lung cancer
OX_LC_00343	holdout	Female	NSCLC	LUAD	Early lung cancer
OX_LC_00344	train	Male	NSCLC	LUSC	Late lung cancer
OX_LC_00345	train	Male	NSCLC	LUAD	Late lung cancer
OX_LC_00346	holdout	Male	SCLC	SCLC	Late lung cancer
OX_LC_00347	train	Male	NSCLC	LUAD	Early lung cancer
OX_LC_00348	holdout	Female	SCLC	SCLC	Early lung cancer
OX_LC_00349	train	Male	NSCLC	Other NSCLC	Early lung cancer
OX_LC_00350	train	Female	NSCLC	LUAD	Early lung cancer
OX_LC_00351	train	Female	NSCLC	LUAD	Early lung cancer
OX_LC_00352	train	Male	NSCLC	LUSC	Late lung cancer
OX_LC_00353	train	Female	NSCLC	Other NSCLC	Late lung cancer
OX_LC_00354	holdout	Female	NSCLC	LUAD	Early lung cancer
OX_LC_00355	train	Female	NSCLC	LUSC	Late lung cancer
OX_LC_00356	train	Male	NSCLC	Other NSCLC	Early lung cancer
OX_LC_00358	train	Male	NSCLC	Other NSCLC	Early lung cancer
OX_LC_00360	train	Male	NSCLC	Other NSCLC	Late lung cancer
OX_LC_00361	train	Female	NSCLC	LUAD	Late lung cancer
OX_LC_00362	train	Male	SCLC	SCLC	Late lung cancer
OX_LC_00363	train	Female	SCLC	SCLC	Late lung cancer
OX_LC_00365	train	Female	NSCLC	Other NSCLC	Early lung cancer
OX_LC_00366	train	Female	NSCLC	LUAD	Late lung cancer
OX_LC_00367	train	Female	NSCLC	LUAD	Early lung cancer
OX_LC_00368	train	Female	NSCLC	LUSC	Late lung cancer
OX_LC_00369	train	Female	SCLC	SCLC	Late lung cancer
OX_LC_00370	train	Male	SCLC	SCLC	Late lung cancer
OX_LC_00371	train	Female	NSCLC	LUAD	Early lung cancer
OX_LC_00372	train	Male	NSCLC	LUSC	Late lung cancer
OX_LC_00373	train	Male	NSCLC	LUSC	Late lung cancer
OX_LC_00374	holdout	Male	NSCLC	LUSC	Late lung cancer
OX_LC_00375	train	Female	SCLC	SCLC	Early lung cancer
OX_LC_00376	holdout	Male	NSCLC	LUAD	Early lung cancer
OX_LC_00377	train	Male	NSCLC	LUSC	Late lung cancer
OX_LC_00378	train	Female	NSCLC	LUAD	Late lung cancer
OX_LC_00379	train	Male	NSCLC	LUSC	Late lung cancer
OX_LC_00380	train	Female	NSCLC	LUAD	Late lung cancer
OX_LC_00381	train	Male	NSCLC	LUAD	Late lung cancer
OX_LC_00382	train	Male	NSCLC	LUSC	Late lung cancer
OX_LC_00383	train	Male	NSCLC	LUSC	Late lung cancer
OX_LC_00385	train	Female	NSCLC	LUSC	Late lung cancer
OX_LC_00386	train	Male	NSCLC	LUSC	Late lung cancer
OX_LC_00387	train	Male	SCLC	SCLC	Late lung cancer
OX_LC_00388	holdout	Female	SCLC	SCLC	Late lung cancer
OX_LC_00389	train	Female	NSCLC	LUAD	Early lung cancer
OX_LC_00390	train	Female	NSCLC	Other NSCLC	Late lung cancer
OX_LC_00392	train	Male	NSCLC	LUAD	Early lung cancer
OX_LC_00393	train	Female	NSCLC	LUSC	Late lung cancer
OX_LC_00396	train	Female	SCLC	SCLC	Late lung cancer
OX_LC_00397	train	Female	NSCLC	LUAD	Late lung cancer
OX_LC_00400	train	Male	NSCLC	LUAD	Early lung cancer
OX_LC_00401	holdout	Male	SCLC	SCLC	Late lung cancer
OX_LC_00402	train	Male	NSCLC	LUAD	Late lung cancer
OX_LC_00403	train	Male	NSCLC	LUAD	Early lung cancer
OX_LC_00404	train	Male	NSCLC	LUAD	Early lung cancer
OX_LC_00405	train	Female	NSCLC	Other NSCLC	Early lung cancer
OX_LC_00406	train	Male	NSCLC	LUSC	Early lung cancer
OX_LC_00407	train	Female	NSCLC	LUAD	Early lung cancer
OX_LC_00408	train	Female	NSCLC	LUAD	Late lung cancer
OX_LC_00409	train	Male	NSCLC	Other NSCLC	Early lung cancer
OX_LC_00411	train	Female	NSCLC	LUAD	Late lung cancer
OX_LC_00413	train	Female	SCLC	SCLC	Late lung cancer
OX_LC_00414	train	Female	NSCLC	Other NSCLC	Late lung cancer
OX_LC_00415	train	Female	NSCLC	LUSC	Late lung cancer
OX_LC_00416	train	Female	NSCLC	Other NSCLC	Early lung cancer
OX_LC_00417	holdout	Male	SCLC	SCLC	Late lung cancer
OX_LC_00418	train	Female	NSCLC	LUAD	Late lung cancer
OX_LC_00419	train	Female	NSCLC	LUAD	Late lung cancer
OX_LC_00420	train	Female	NSCLC	LUAD	Late lung cancer
OX_LC_00421	train	Male	NSCLC	Other NSCLC	Early lung cancer
OX_LC_00422	holdout	Male	SCLC	SCLC	Late lung cancer
OX_LC_00423	train	Female	NSCLC	LUAD	Early lung cancer
OX_LC_00424	train	Female	NSCLC	LUAD	Unknown
OX_LC_00425	train	Male	NSCLC	LUSC	Late lung cancer
OX_LC_00426	train	Female	NSCLC	Other NSCLC	Early lung cancer
OX_LC_00427	train	Female	NSCLC	Other NSCLC	Early lung cancer
OX_LC_00428	train	Male	NSCLC	Other NSCLC	Late lung cancer
OX_LC_00429	train	Male	SCLC	SCLC	Late lung cancer
OX_LC_00430	train	Male	NSCLC	LUSC	Late lung cancer
OX_LC_00431	train	Female	SCLC	SCLC	Late lung cancer
OX_LC_00432	train	Female	NSCLC	LUAD	Late lung cancer
OX_LC_00433	train	Male	SCLC	SCLC	Late lung cancer
OX_LC_00435	train	Female	NSCLC	LUAD	Early lung cancer
OX_LC_00436	holdout	Male	NSCLC	Other NSCLC	Early lung cancer
OX_LC_00437	train	Female	NSCLC	LUAD	Early lung cancer
OX_LC_00438	train	Male	NSCLC	LUAD	Late lung cancer
OX_LC_00439	train	Male	NSCLC	Other NSCLC	Late lung cancer
OX_LC_00440	train	Female	NSCLC	LUAD	Early lung cancer
OX_LC_00441	train	Female	NSCLC	LUAD	Early lung cancer
OX_LC_00442	train	Female	NSCLC	LUAD	Early lung cancer
OX_LC_00443	holdout	Female	NSCLC	LUSC	Late lung cancer
OX_LC_00444	holdout	Male	NSCLC	LUAD	Early lung cancer
OX_LC_00445	holdout	Male	NSCLC	LUAD	Late lung cancer
OX_LC_00446	holdout	Female	NSCLC	LUAD	Early lung cancer
OX_LC_00447	train	Female	NSCLC	LUSC	Late lung cancer
OX_LC_00448	train	Female	NSCLC	LUAD	Early lung cancer
OX_LC_00449	train	Male	NSCLC	LUAD	Early lung cancer
OX_LC_00450	train	Male	NSCLC	LUAD	Early lung cancer
OX_LC_00451	train	Female	NSCLC	LUAD	Late lung cancer
OX_LC_00452	train	Female	NSCLC	LUAD	Late lung cancer
OX_LC_00453	holdout	Female	NSCLC	LUAD	Late lung cancer
OX_LC_00454	holdout	Female	NSCLC	LUAD	Late lung cancer
OX_LC_00455	train	Female	NSCLC	LUAD	Late lung cancer
OX_LC_00456	train	Female	NSCLC	LUAD	Late lung cancer
OX_LC_00457	train	Female	NSCLC	Other NSCLC	Late lung cancer
OX_LC_00458	train	Female	NSCLC	LUAD	Late lung cancer
OX_LC_00459	train	Female	NSCLC	LUAD	Late lung cancer
OX_LC_00460	train	Female	NSCLC	LUAD	Late lung cancer
OX_LC_00461	train	Female	NSCLC	LUAD	Late lung cancer
OX_LC_00462	train	Female	NSCLC	LUAD	Late lung cancer
OX_LC_00463	holdout	Female	NSCLC	LUAD	Late lung cancer
OX_LC_00464	holdout	Female	NSCLC	LUAD	Late lung cancer
OX_LC_00465	train	Male	NSCLC	LUAD	Late lung cancer
OX_LC_00466	train	Male	NSCLC	Other NSCLC	Late lung cancer
OX_LC_00467	train	Female	NSCLC	LUAD	Late lung cancer
OX_LC_00468	train	Female	NSCLC	LUAD	Late lung cancer
OX_LC_00469	train	Male	NSCLC	LUAD	Late lung cancer
OX_LC_00470	holdout	Male	NSCLC	LUAD	Late lung cancer
OX_LC_00471	train	Female	NSCLC	Other NSCLC	Late lung cancer
OX_LC_00472	train	Female	NSCLC	LUAD	Late lung cancer
OX_LC_00473	train	Male	NSCLC	LUAD	Late lung cancer
OX_LC_00474	holdout	Female	NSCLC	LUAD	Late lung cancer
OX_LC_00475	train	Female	NSCLC	LUAD	Late lung cancer
OX_LC_00476	holdout	Female	NSCLC	LUAD	Late lung cancer
OX_LC_00477	train	Female	NSCLC	LUAD	Late lung cancer
OX_LC_00478	train	Female	NSCLC	LUAD	Late lung cancer
OX_LC_00479	train	Male	NSCLC	LUAD	Late lung cancer
OX_LC_00480	train	Female	NSCLC	LUAD	Late lung cancer
OX_LC_00481	train	Female	NSCLC	LUAD	Late lung cancer
OX_LC_00482	train	Female	NSCLC	LUAD	Late lung cancer
OX_LC_00483	train	Female	NSCLC	LUAD	Late lung cancer
OX_LC_00484	train	Female	NSCLC	LUAD	Late lung cancer
OX_LC_00485	train	Male	NSCLC	LUAD	Late lung cancer
OX_LC_00486	holdout	Female	NSCLC	LUAD	Late lung cancer
OX_LC_00487	train	Male	NSCLC	LUAD	Late lung cancer
OX_LC_00488	holdout	Female	NSCLC	LUAD	Late lung cancer
OX_LC_00489	train	Female	NSCLC	LUAD	Late lung cancer
OX_LC_00490	train	Female	NSCLC	Other NSCLC	Late lung cancer
