# Supplementary material for: Multidimensional proteomics and explainable AI feature selection identify cross-platform lung cancer molecular signature in blood plasma
Source: Research Square preprint supplement (doi:10.21203/rs.3.rs-7660411/v1), 2025-10-31
Supplement: Supplementary file 3 [file 4304b31e4e93c38d95dbbd08.xlsx]

## Sheet: IK_PMLCT_Ex480_x714_Report
PG.ProteinGroups	PG.Genes	PG.ProteinDescriptions	PG.ProteinNames	[1] IK_PMLCT_MP_001.htrms.PG.Quantity	[2] IK_PMLCT_plate1_A1_002.htrms.PG.Quantity	[3] IK_PMLCT_plate1_A2_003.htrms.PG.Quantity	[4] IK_PMLCT_plate1_A3_004.htrms.PG.Quantity	[5] IK_PMLCT_plate1_A4_005.htrms.PG.Quantity	[6] IK_PMLCT_plate1_A5_006.htrms.PG.Quantity	[7] IK_PMLCT_plate1_A6_007.htrms.PG.Quantity	[8] IK_PMLCT_plate1_A7_008.htrms.PG.Quantity	[9] IK_PMLCT_plate1_A8_009.htrms.PG.Quantity	[10] IK_PMLCT_plate1_A9_010.htrms.PG.Quantity	[11] IK_PMLCT_plate1_A10_011.htrms.PG.Quantity	[12] IK_PMLCT_plate1_A11_012.htrms.PG.Quantity	[13] IK_PMLCT_plate1_A12_013.htrms.PG.Quantity	[14] IK_PMLCT_MP_014.htrms.PG.Quantity	[15] IK_PMLCT_plate1_B1_015.htrms.PG.Quantity	[16] IK_PMLCT_plate1_B2_016.htrms.PG.Quantity	[17] IK_PMLCT_plate1_B3_017.htrms.PG.Quantity	[18] IK_PMLCT_plate1_B4_018.htrms.PG.Quantity	[19] IK_PMLCT_plate1_B5_019.htrms.PG.Quantity	[20] IK_PMLCT_plate1_B6_020.htrms.PG.Quantity	[21] IK_PMLCT_plate1_B7_021.htrms.PG.Quantity	[22] IK_PMLCT_plate1_B9_022.htrms.PG.Quantity	[23] IK_PMLCT_plate1_B10_023.htrms.PG.Quantity	[24] IK_PMLCT_plate1_B11_024.htrms.PG.Quantity	[25] IK_PMLCT_plate1_B12_025.htrms.PG.Quantity	[26] IK_PMLCT_MP_026.htrms.PG.Quantity	[27] IK_PMLCT_plate1_C1_027.htrms.PG.Quantity	[28] IK_PMLCT_plate1_C3_029.htrms.PG.Quantity	[29] IK_PMLCT_plate1_C2_028.htrms.PG.Quantity	[30] IK_PMLCT_plate1_C4_030.htrms.PG.Quantity	[31] IK_PMLCT_plate1_C5_031.htrms.PG.Quantity	[32] IK_PMLCT_plate1_C6_032.htrms.PG.Quantity	[33] IK_PMLCT_plate1_C7_033.htrms.PG.Quantity	[34] IK_PMLCT_plate1_C8_034.htrms.PG.Quantity	[35] IK_PMLCT_plate1_C9_035.htrms.PG.Quantity	[36] IK_PMLCT_plate1_C10_036.htrms.PG.Quantity	[37] IK_PMLCT_plate1_C11_037.htrms.PG.Quantity	[38] IK_PMLCT_plate1_C12_038.htrms.PG.Quantity	[39] IK_PMLCT_MP_039.htrms.PG.Quantity	[40] IK_PMLCT_plate1_D1_040.htrms.PG.Quantity	[41] IK_PMLCT_plate1_D2_041.htrms.PG.Quantity	[42] IK_PMLCT_plate1_D3_042.htrms.PG.Quantity	[43] IK_PMLCT_plate1_D4_043.htrms.PG.Quantity	[44] IK_PMLCT_plate1_D5_044.htrms.PG.Quantity	[45] IK_PMLCT_plate1_D6_045.htrms.PG.Quantity	[46] IK_PMLCT_plate1_D7_046.htrms.PG.Quantity
A0A075B6H7	IGKV3-7	Probable non-functional immunoglobulin kappa variable 3-7	KV37_HUMAN	2.64434e+06	1.73959e+06	18878382	2.01098e+06	45788396	1.46878e+06	1.31322e+06	2400094	11860633	936880	1.91887e+06	3.8905e+06	2.61599e+06	2.39821e+06	2.33226e+06	4059077	891886	12205652	3.22883e+06	2.40045e+06	987344	5977896	1.22473e+06	1791014	2.71334e+06	2314620	1.82889e+06	5.35718e+06	4682393	11764824	728950	1.40475e+06	3.93313e+06	750698304	903466	2.04468e+06	701384	2.3637e+06	2.84409e+06	1.91819e+06	2.30039e+06	11878997	3.91486e+06	2.38375e+06	3130233	1797192
A0A075B6H9	IGLV4-69	Immunoglobulin lambda variable 4-69	LV469_HUMAN	NaN	11674.8	18851.7	NaN	111144	NaN	NaN	NaN	NaN	NaN	45112.1	NaN	67212.9	NaN	NaN	19996.6	NaN	459680	8493.08	NaN	NaN	2722.95	NaN	NaN	NaN	NaN	NaN	NaN	11585.1	25877.8	8971.19	NaN	36636.2	NaN	5975.84	5890.77	11626.9	NaN	98329.2	518.56	12053.5	7311.15	11358.6	19658.1	29139.1	NaN
A0A075B6I0	IGLV8-61	Immunoglobulin lambda variable 8-61	LV861_HUMAN	NaN	346993	124230	NaN	1.42676e+06	NaN	NaN	NaN	NaN	NaN	NaN	NaN	36459.4	NaN	493919	NaN	NaN	4.82942e+06	NaN	NaN	1.19808	NaN	NaN	NaN	NaN	NaN	NaN	35817.2	229456	1.59218e+06	48013.3	NaN	183198	NaN	NaN	NaN	10566.6	73863.6	80658.6	NaN	105905	108845	44526.9	NaN	220135	151079
A0A075B6I1	IGLV4-60	Immunoglobulin lambda variable 4-60	LV460_HUMAN	NaN	NaN	NaN	NaN	NaN	NaN	NaN	NaN	NaN	NaN	NaN	NaN	NaN	NaN	NaN	NaN	NaN	NaN	NaN	NaN	NaN	NaN	NaN	NaN	NaN	NaN	NaN	370.284	NaN	NaN	NaN	NaN	NaN	NaN	NaN	NaN	NaN	NaN	NaN	NaN	NaN	NaN	718.52	NaN	NaN	NaN
A0A075B6I9	IGLV7-46	Immunoglobulin lambda variable 7-46	LV746_HUMAN	NaN	17814.9	55356.8	NaN	115878	NaN	84657.8	1.21511	10774.5	6262.18	NaN	NaN	NaN	1.4883	NaN	6888.2	NaN	400026	24406.7	NaN	NaN	1	NaN	20716.4	12169.1	1.49743	17815	7381.56	8695.04	388722	1.03778	8489.09	33880.2	1.23583	24787	1.0817	7912.77	1	20904.8	48035.4	NaN	NaN	221055	10311.1	17420.8	NaN
A0A075B6J2	IGLV2-33	Probable non-functional immunoglobulin lambda variable 2-33	LV233_HUMAN	NaN	NaN	46667.7	NaN	41638.1	NaN	9061.79	NaN	8895.9	27170.5	NaN	NaN	NaN	NaN	NaN	12570	NaN	71141.1	NaN	NaN	20397.4	19284.5	NaN	NaN	1.27012	12918.1	102630	1.64862	NaN	NaN	23670.1	28669.1	NaN	NaN	1.21629	12387	NaN	NaN	1.35088	98735.9	1.14119	NaN	10504.5	NaN	NaN	NaN
A0A075B6J9	IGLV2-18	Immunoglobulin lambda variable 2-18	LV218_HUMAN	26208.2	1.81311	64991.2	11645.8	373889	NaN	4710.7	NaN	188308	30028.9	12648.8	8465.55	82567.6	34509.7	11318.2	9574.01	NaN	511049	16535.8	9021.51	NaN	11017.6	58619.7	52525.1	91679.7	39634.4	54753.9	39511.1	15521.7	410738	6454.6	86959.5	19074.1	NaN	89546.5	55684.5	21332.7	38713.4	17440	12643.1	22380.9	7950.57	56202.6	34575.3	55551.6	8458.08
A0A075B6K4	IGLV3-10	Immunoglobulin lambda variable 3-10	LV310_HUMAN	39995.9	1.81311	109949	1.30709	863117	17381.9	1	9005.43	164867	15293.8	42911.4	96915.9	37924.4	NaN	99836.1	1	87340.2	604107	16038.5	43336	NaN	5450.8	13033.4	35232.6	87103.7	16476.2	30356.8	81460.9	149663	128606	10307.8	45758.1	125403	NaN	6704.62	17640.2	9322.52	65881.8	38202.2	49091.9	30894.9	11189.9	23116	26915.1	15518.3	NaN
A0A075B6K5	IGLV3-9	Immunoglobulin lambda variable 3-9	LV39_HUMAN	252870	155675	299495	314713	2.01715e+06	66931	158850	106782	378498	160921	170597	247687	270908	385223	613011	151903	112587	4.72935e+06	220927	220998	39727.7	183282	85540.1	202952	295273	281228	199236	382504	364125	643521	123395	154658	470551	55880.1	242987	164163	127407	302020	214729	293579	155215	148788	226441	381859	253999	182940
A0A075B6P5;P01615	IGKV2-28;IGKV2D-28	Immunoglobulin kappa variable 2-28;Immunoglobulin kappa variable 2D-28	KV228_HUMAN;KVD28_HUMAN	9221.44	6951.34	19189	1.30707	679406	39416.3	1	9240.32	294692	6279.31	43778.9	24454.1	NaN	NaN	8409.36	41222.5	NaN	694993	11716.2	16375.9	NaN	7075.13	19783.1	6064.62	39309.6	10934.3	31778.6	52738.6	38068.1	195353	NaN	27519.1	74073.7	14129.7	NaN	12330.9	9594.83	15172.3	NaN	NaN	4571.86	41419.2	8668.12	45969.7	15116.3	1.31998
A0A075B6Q5	IGHV3-64	Immunoglobulin heavy variable 3-64	HV364_HUMAN	NaN	NaN	3188.5	NaN	207151	NaN	NaN	1.21511	99016.8	NaN	NaN	1.04698	NaN	1.48831	NaN	4536.74	NaN	81383.5	NaN	NaN	NaN	1	NaN	NaN	16835	NaN	1.14763	1.64862	NaN	1	NaN	1.13404	10913.6	NaN	NaN	NaN	1528.08	1	NaN	44037.3	1.14119	1.61184	35283.2	NaN	19661.1	1.31997
A0A075B6R2	IGHV4-4	Immunoglobulin heavy variable 4-4	HV404_HUMAN	NaN	NaN	5363.37	NaN	40310	5349.54	NaN	NaN	NaN	NaN	11316.5	5441.4	NaN	NaN	NaN	NaN	NaN	87270.7	NaN	NaN	NaN	NaN	NaN	NaN	NaN	NaN	NaN	NaN	NaN	NaN	NaN	NaN	38697.3	NaN	NaN	NaN	NaN	22697.2	NaN	NaN	NaN	NaN	NaN	NaN	NaN	NaN
A0A075B6R9;A0A0C4DH68	IGKV2D-24;IGKV2-24	Probable non-functional immunoglobulin kappa variable 2D-24;Immunoglobulin kappa variable 2-24	KVD24_HUMAN;KV224_HUMAN	632376	787171	905812	308555	911648	926396	1.19397e+06	1.43045e+06	2.16989e+06	593080	1.75859e+06	189344	1.17784e+06	641381	1.81641e+06	870580	2.70544e+06	1.20797e+06	495514	386436	175646	772164	1.45413e+06	1.53291e+06	2.96817e+06	797200	950480	6774232	2.58803e+06	310696	552400	563374	1.32743e+06	446277	624897	2.1944e+06	574549	1.09726e+06	860898	530254	976054	989711	715912	1.54505e+06	1.20811e+06	961220
A0A075B6S2	IGKV2D-29	Immunoglobulin kappa variable 2D-29	KVD29_HUMAN	9647376	4271763	6.70087e+06	5189071	44580908	3.8246e+06	1.81992e+06	3.63014e+06	10847219	2705959	6.28875e+06	2.6938e+06	4322857	4.93598e+06	5.12618e+06	5.19437e+06	8338890	45456728	2227138	2.38856e+06	1.79046e+06	2.19193e+06	3.84827e+06	6850941	5427576	3.0794e+06	4.89535e+06	5.90326e+06	4.05163e+06	12855233	2.33851e+06	3.51368e+06	12580105	1674329	3.95754e+06	3225685	1.75753e+06	3.19403e+06	4280753	3.93587e+06	5970515	11608485	4468002	4.27975e+06	3.19767e+06	3.33556e+06
A0A075B6S5	IGKV1-27	Immunoglobulin kappa variable 1-27	KV127_HUMAN	NaN	NaN	70431.5	NaN	633275	NaN	NaN	NaN	209989	NaN	42359.4	NaN	NaN	NaN	NaN	45844.4	NaN	6.1439e+06	13545.7	NaN	NaN	NaN	NaN	NaN	16496.6	NaN	16027.8	51561.5	NaN	4708.88	NaN	NaN	150010	NaN	12712.4	NaN	NaN	NaN	NaN	NaN	NaN	NaN	56176.1	NaN	NaN	NaN
A0A075B6S6	IGKV2D-30	Immunoglobulin kappa variable 2D-30	KVD30_HUMAN	NaN	NaN	NaN	10234.7	NaN	NaN	NaN	NaN	NaN	NaN	NaN	NaN	NaN	NaN	NaN	NaN	NaN	1.03068	NaN	17046.6	NaN	NaN	NaN	NaN	NaN	NaN	NaN	NaN	NaN	1	NaN	NaN	120834	NaN	NaN	NaN	NaN	NaN	NaN	NaN	NaN	NaN	1	1.03557	NaN	NaN
A0A075B6V5	TRAV36DV7	T cell receptor alpha variable 36/delta variable 7	TVA36_HUMAN	1.39363	4980.01	5765.85	NaN	NaN	11934.5	3078.87	3522.87	NaN	8367.29	NaN	1570.3	1.05133	4517.43	5490.15	10101.6	NaN	NaN	15073.1	2669.24	779.422	1718.41	3072.03	5140.23	7895.67	1890.12	4349.94	8163.8	16170	5638.31	256.232	2640.78	NaN	9347.32	1.21631	1.08169	1535.22	NaN	5892.36	5573.84	3516.52	3313.4	6850.77	1.03556	2550.19	2853.6
A0A075B708	TRAJ61	T cell receptor alpha joining 61 (non-functional) (Fragment)	A0A075B708_HUMAN	52222.3	NaN	122263	NaN	794244	40379.8	99139.5	81146.3	NaN	10364.2	84049.1	NaN	NaN	NaN	NaN	NaN	NaN	583866	NaN	NaN	17786.7	NaN	NaN	NaN	NaN	NaN	NaN	NaN	NaN	109472	42476.9	NaN	124739	NaN	NaN	NaN	NaN	NaN	NaN	59623.6	NaN	NaN	466627	NaN	NaN	NaN
A0A075B7B6	IGHV4OR15-8	Immunoglobulin heavy variable 4/OR15-8 (non-functional) (Fragment)	A0A075B7B6_HUMAN	120245	217880	256439	88962.1	1.35396e+06	84502.2	109234	479240	189766	23553	465127	295723	27744.4	134838	221851	209113	NaN	2133420	89450	15883.1	50385.8	74856.6	14656.2	146643	19835	160661	207210	226264	74989.8	222045	114705	142375	427917	9475.79	96122.8	100077	45729.1	168671	122962	164037	55848.4	130954	22403.6	1.03557	205978	57492.4
A0A075B7B8	IGHV3OR16-12	Immunoglobulin heavy variable 3/OR16-12 (non-functional) (Fragment)	A0A075B7B8_HUMAN	55721.1	10079.1	148086	165294	757790	25337.4	60446.3	65550.6	230323	51456.2	124797	19166.4	198241	16223.8	312563	22534.6	150584	2830558	1	23368.3	41751.3	1	92875.2	15603	155816	91143.8	232681	531494	48966.1	1.22618e+06	42352.3	84294.2	156835	1.23583	21713.7	14400.5	31155.2	40262	60292.2	58733.9	94149.8	136172	92289.9	150965	317352	28043.1
A0A075B7D0	IGHV1OR15-1	Immunoglobulin heavy variable 1/OR15-1 (non-functional) (Fragment)	A0A075B7D0_HUMAN	117422	88242.5	105615	NaN	610564	89995.9	7807.54	83034.4	105997	15206.2	NaN	10361.8	101610	201109	66440.2	41051.3	101685	352741	107063	NaN	NaN	63500.9	NaN	1	289614	44150.9	62702.8	170567	29440.1	584245	24429.3	11972.3	1.16708e+06	23379.8	16848.6	NaN	NaN	219021	112796	187660	23494.5	75602.5	77545.6	NaN	141244	65065.8
A0A075B7D8	IGHV3OR15-7	Immunoglobulin heavy variable 3/OR15-7 (pseudogene) (Fragment)	A0A075B7D8_HUMAN	7516.42	22841.3	175619	1.30708	1.58065e+06	18724.6	93413.2	15438.6	210921	24184.3	31906.5	32076.3	130356	27159.1	145904	180249	28746.2	5089625	50777.3	53825.2	1.19808	37465.4	57628.8	154682	186670	33479.8	116160	26784.9	45886.5	378322	7564.47	15834	144536	1.23584	41942.4	56374.9	7029.6	24536.8	11756.4	35150.1	44713.5	28662.5	326163	13363.6	68264.8	15162.2
A0A075B7E8	IGHV3OR16-13	Immunoglobulin heavy variable 3/OR16-13 (non-functional) (Fragment)	A0A075B7E8_HUMAN	178124	138486	128614	134776	327594	111439	127329	137521	NaN	120408	116972	35117.2	150524	88811.6	197984	199822	NaN	435118	141823	115501	114326	145295	147743	207845	178314	202811	180470	195703	189104	331203	76050.7	177684	144491	150318	193632	163799	151945	NaN	162937	101159	164278	201525	255093	119983	146218	149424
A0A087WSX0	IGLV5-45	Immunoglobulin lambda variable 5-45	LV545_HUMAN	35720.9	23538.1	78116.1	61960.6	249310	NaN	NaN	1.21511	58138.9	1	NaN	1.04698	NaN	11037.1	NaN	NaN	18873.6	320947	NaN	NaN	NaN	17142.6	NaN	84798.8	NaN	46559.9	NaN	1.6486	NaN	30666.8	NaN	1.13404	1.08332	NaN	NaN	NaN	NaN	NaN	43090.8	6649.27	1.14119	1.61184	115487	NaN	158136	NaN
A0A087WSY4	IGHV4-30-2	Immunoglobulin heavy variable 4-30-2	HV432_HUMAN	63532.2	NaN	161451	40770.1	1119996	179186	163352	51559.5	107762	106788	62999.4	390351	NaN	84737.4	NaN	165002	NaN	880012	52668.6	NaN	NaN	80597.7	32969.1	63206.8	72601.8	77213.7	NaN	NaN	22276.3	296237	93668	87941.5	74733.8	NaN	NaN	84419.2	53641.7	144340	61111.8	NaN	37576.8	97509.2	71834.8	9613.33	100763	84863.4
A0A087WSY6	IGKV3D-15	Immunoglobulin kappa variable 3D-15	KVD15_HUMAN	129654	109509	262741	74144.6	1220448	236594	79854.4	167854	182169	89849	108039	214130	345139	166719	151290	141566	91216.3	3430458	139148	95583	176019	103916	130744	95657.8	218180	130590	220535	276564	252695	659362	NaN	142119	439700	98562.5	50074.5	16036.9	27119.3	77696.8	131678	320997	70370.8	118064	215609	69371	286413	113220
A0A087WSZ0	IGKV1D-8	Immunoglobulin kappa variable 1D-8	KVD08_HUMAN	1.39363	1.81311	1	1.30707	5015.41	NaN	NaN	NaN	10340.8	1	1	1.04697	780.646	NaN	2.07499	1	NaN	6692.7	1	1	1.19808	1	1.04106	1	1.27012	1.49742	1.14764	1.6486	1.27139	1717.35	1.03778	1.13403	14611.2	43.874	10930.7	NaN	1.07838	1	NaN	1	1.14119	1.61184	1	1.03556	1.65533	1.31998
A0A087WW87;P01614	IGKV2-40;IGKV2D-40	Immunoglobulin kappa variable 2-40;Immunoglobulin kappa variable 2D-40	KV240_HUMAN;KVD40_HUMAN	131980	108330	185888	100544	734832	136374	69787.2	156188	261585	84668.3	217902	45591.4	124272	NaN	193162	183932	166840	325785	72274.7	75521.2	17001.3	2334.35	89072.1	NaN	NaN	164478	203731	287266	212661	497264	54748	58061.8	437258	51400	43458.5	40036.8	43086	NaN	129631	488.31	42548.8	149350	65878.2	180484	75151.6	81928.4
A0A0A0MRZ8;P04433	IGKV3D-11;IGKV3-11	Immunoglobulin kappa variable 3D-11;Immunoglobulin kappa variable 3-11	KVD11_HUMAN;KV311_HUMAN	2.10362e+06	1.74263e+06	4484208	2.15907e+06	7469688	355653056	1.52844e+06	3.01512e+06	5.29687e+06	1.43987e+06	1821847	4587155	1.65973e+06	2257259	4638763	1.74806e+06	71663384	17685710	2.87345e+06	2101809	964414	1.40874e+06	1.24752e+06	1.1846e+06	4366877	1.37894e+06	2.21192e+06	2443387	3933272	4.83405e+06	1.01233e+06	3.81501e+06	4487174	927764	1.65087e+06	2.90379e+06	1.11453e+06	1.85816e+06	2112018	3.08381e+06	1.84495e+06	4822491	2.15381e+06	2.47037e+06	3417110	1.462e+06
A0A0A0MS15	IGHV3-49	Immunoglobulin heavy variable 3-49	HV349_HUMAN	130434	105168	320501	151070	883009	131833	88512.4	130105	592493	122025	136064	87650.7	105363	144482	70102.3	133519	334030	1.59433e+06	69550.1	39035.1	43952.2	100997	150798	163228	116801	116586	294704	202718	158434	378879	57756.7	124818	788159	56314	111890	91902.7	41172.1	181440	136923	189043	73039.3	200911	133955	182924	121396	106762
A0A0A0MT36	IGKV6D-21	Immunoglobulin kappa variable 6D-21	KVD21_HUMAN	NaN	331918	42359.7	NaN	577340	NaN	1	NaN	172852	NaN	NaN	NaN	NaN	9064.5	NaN	7174.33	NaN	151786	13204	35779.5	NaN	26654	1.04107	NaN	NaN	19393.1	34012	23554.7	46127.6	298333	NaN	32891.8	40985.9	NaN	11537.5	1.0817	NaN	12039.8	1.35088	53188.6	5051.91	7802.84	69433.6	14461.2	NaN	7512.85
A0A0A0MT69	IGKJ4	Immunoglobulin kappa joining 4 (Fragment)	A0A0A0MT69_HUMAN	NaN	NaN	NaN	NaN	105782	NaN	NaN	NaN	181295	NaN	60784.9	NaN	NaN	NaN	NaN	NaN	NaN	390162	NaN	NaN	NaN	NaN	NaN	NaN	NaN	NaN	NaN	NaN	NaN	134092	NaN	72273.6	59226.8	NaN	NaN	NaN	NaN	NaN	NaN	NaN	NaN	NaN	NaN	NaN	NaN	40491.7
A0A0A6YYC5	TRAV14DV4	T cell receptor alpha variable 14/delta variable 4	TVA14_HUMAN	NaN	NaN	NaN	NaN	NaN	NaN	NaN	NaN	37739.5	NaN	NaN	NaN	NaN	NaN	NaN	NaN	NaN	NaN	NaN	NaN	NaN	NaN	NaN	NaN	NaN	NaN	NaN	NaN	NaN	NaN	1.03778	NaN	NaN	NaN	NaN	NaN	NaN	4324.08	NaN	NaN	NaN	NaN	NaN	NaN	12600.7	6408.58
A0A0A6YYK6	TRAV16	T cell receptor alpha variable 16	TVA16_HUMAN	NaN	NaN	NaN	NaN	NaN	NaN	NaN	NaN	NaN	NaN	NaN	1.04698	13699.4	NaN	NaN	NaN	NaN	NaN	NaN	NaN	NaN	NaN	NaN	2912.72	NaN	NaN	NaN	NaN	NaN	NaN	NaN	NaN	NaN	NaN	NaN	NaN	NaN	11665.8	NaN	NaN	NaN	NaN	NaN	NaN	NaN	NaN
A0A0B4J1U6	TRBV9	T cell receptor beta variable 9	TVB9_HUMAN	NaN	11908.2	NaN	NaN	NaN	NaN	NaN	NaN	NaN	NaN	NaN	NaN	NaN	NaN	NaN	NaN	NaN	NaN	NaN	NaN	9101.88	NaN	NaN	NaN	NaN	NaN	NaN	NaN	43030.7	NaN	23099.2	27822.7	17519.9	NaN	54166.1	NaN	NaN	8536.78	NaN	NaN	NaN	19483.4	NaN	26917.6	NaN	NaN
A0A0B4J1U7	IGHV6-1	Immunoglobulin heavy variable 6-1	HV601_HUMAN	190146	120136	314818	85107.8	2291249	83454.2	110529	228305	908596	116299	252947	137304	144665	271142	251644	124852	79129	1862204	119964	123636	75010.4	99038.5	157734	183653	243288	123762	265140	628849	293533	1.0091e+06	45263.3	164356	290753	83931.6	54905.6	180960	98369.8	355767	97045.6	211083	154343	270592	176064	123710	176940	91194.5
A0A0B4J1V0	IGHV3-15	Immunoglobulin heavy variable 3-15	HV315_HUMAN	21221.9	75203.9	196638	9066.68	618691	17336.3	137904	16048.5	258667	58979.1	40590.3	57941.9	49825.4	86805.8	106110	87265.3	NaN	1851635	37027.2	37782.7	1.19808	35702.5	32598	124011	54078.1	78479.6	67566.3	114556	15988.6	326815	21608.7	22971.9	224619	1.23584	30167.2	58498.8	7029.61	16492	69022.4	24129.3	31672.8	40290.5	176168	65796	77566.8	12091.4
A0A0B4J1V1	IGHV3-21	Immunoglobulin heavy variable 3-21	HV321_HUMAN	NaN	NaN	NaN	NaN	2695.94	NaN	199.789	927.029	3787.75	1	581.098	NaN	1092.2	NaN	1413.84	414.568	6517.23	NaN	388.045	NaN	1188.93	1452.17	NaN	NaN	NaN	NaN	NaN	1886.82	NaN	681.277	NaN	302.075	NaN	1469.5	NaN	795.446	218.977	2350.27	NaN	NaN	NaN	NaN	351.509	26.8254	2767.5	1179.41
A0A0B4J1V2	IGHV2-26	Immunoglobulin heavy variable 2-26	HV226_HUMAN	47780.9	30127.8	55567.5	12555.7	328081	21505.5	24740.3	24206	31706.4	17475.3	29294.4	42511.9	78209.6	41077.8	58245.4	40138.8	1684.6	347218	20804.1	NaN	10642.5	18826.1	8575.45	43699	37435.2	44348.8	NaN	49952.7	32158	94622.5	18019.7	16885.3	34864	14269.1	22628.9	21846.4	38838.9	32752.4	NaN	47865.4	NaN	32466.8	71731.3	35276.4	42840.8	32497.7
A0A0B4J1V6	IGHV3-73	Immunoglobulin heavy variable 3-73	HV373_HUMAN	1977158	974239	1.13749e+06	1.39711e+06	4561135	636288	385014	805124	2.88502e+06	518287	474580	506103	946615	1.9758e+06	1.0516e+06	1866108	1.49212e+06	1.78444e+06	431060	475380	259706	688640	360148	308502	1122736	2.10626e+06	819265	1.14741e+06	1.16963e+06	2.63197e+06	562001	694047	949317	544549	267923	455224	776943	667484	2092255	465400	1.24115e+06	688489	1.45002e+06	660695	739091	604158
A0A0B4J1X5	IGHV3-74	Immunoglobulin heavy variable 3-74	HV374_HUMAN	490907	1.05568e+06	1.14724e+06	669229	6.15285e+06	548799	51851.9	971025	4887910	493487	1.33018e+06	264364	727623	466725	1.79647e+06	1.52017e+06	1.35792e+06	13008639	398040	644893	236821	249619	764588	432699	860873	497193	1.6447e+06	1696477	886012	2.97801e+06	447056	956378	2459972	337158	302442	484976	610331	275224	535793	373483	390285	1.51244e+06	746769	593450	874726	767239
A0A0B4J1X8	IGHV3-43	Immunoglobulin heavy variable 3-43	HV343_HUMAN	1.39363	18704.9	55541.5	NaN	1.23112	NaN	NaN	1.21511	2.70598	19041.3	33732.9	1.04698	1.05134	1.4883	2.075	16230.3	4.31492	2852.54	1	14838.3	1.19808	1	1.04107	1	20989.5	1.49743	1.14763	3244.4	34576.9	153962	1.03778	1.13403	140026	NaN	1.21629	NaN	NaN	1	1.35088	13120	11027	1.61184	139548	8242.81	39388.9	1.03573
A0A0B4J1Y8	IGLV9-49	Immunoglobulin lambda variable 9-49	LV949_HUMAN	71044	18210.4	75973.5	20825.8	48012.3	1.24128	80195.3	1.21511	82758.5	25651.9	NaN	182321	94790	53994.7	97134.5	107901	103936	738301	22695.2	1	34923.2	30904.5	NaN	1	77657.2	56210.5	133412	16509.2	23322.6	360905	1.03778	1.13404	152712	NaN	1.21629	1.0817	9892.12	46892.2	18875.8	151345	1.14119	18232.3	47228.1	3859.56	14635.2	37522.1
A0A0B4J1Y9	IGHV3-72	Immunoglobulin heavy variable 3-72	HV372_HUMAN	13252.9	9694.8	26058.6	23465.7	452473	44607.2	7225.56	265.463	190128	3758.19	1	12456.7	14110.5	10995.2	39794	31118.4	14968.8	887717	40268.7	10462	1.19808	6920.5	36733.1	19656.1	34467.6	10396.1	23395.7	22801.6	18410.2	115661	9795.33	25423.9	30332.3	8749.38	8450.78	16792.6	3054.2	16490.3	9826.11	26408.1	13813.5	13244.5	139770	15261.7	12097.3	1988.44
A0A0B4J2B5	IGHV3OR16-9	Immunoglobulin heavy variable 3/OR16-9 (non-functional) (Fragment)	A0A0B4J2B5_HUMAN	1185890	925726	938991	199354	4165481	580552	436034	494183	2.35997e+06	527750	694357	753746	921884	666391	594620	398725	997925	3584264	558989	224666	185531	758452	439752	664391	903552	691391	343838	606498	436339	1.8869e+06	265548	314711	1.46408e+06	350269	406480	707700	190227	365417	150056	332112	366812	643868	1.19114e+06	589248	332041	247928
A0A0B4J2D5;P0DPI2	GATD3B;GATD3	Putative glutamine amidotransferase-like class 1 domain-containing protein 3B, mitochondrial;Glutamine amidotransferase-like class 1 domain-containing protein 3, mitochondrial	GAL3B_HUMAN;GAL3A_HUMAN	NaN	NaN	NaN	NaN	NaN	NaN	NaN	NaN	NaN	NaN	NaN	NaN	NaN	NaN	NaN	NaN	NaN	NaN	NaN	NaN	NaN	NaN	NaN	NaN	NaN	NaN	NaN	NaN	NaN	NaN	NaN	NaN	NaN	NaN	NaN	NaN	NaN	NaN	NaN	NaN	NaN	NaN	NaN	NaN	NaN	NaN
A0A0B4J2D9;P0DP09	IGKV1D-13;IGKV1-13	Immunoglobulin kappa variable 1D-13;Immunoglobulin kappa variable 1-13	KVD13_HUMAN;KV113_HUMAN	NaN	NaN	95313.9	NaN	1.23112	NaN	2764.85	1.19043	NaN	NaN	NaN	NaN	NaN	NaN	NaN	NaN	NaN	238716	13769.9	1	NaN	38545.1	NaN	NaN	309147	NaN	NaN	NaN	NaN	30356.6	NaN	NaN	NaN	NaN	NaN	1.0817	NaN	207585	NaN	NaN	78909.6	NaN	799855	1.03556	55474.6	NaN
A0A0C4DH24	IGKV6-21	Immunoglobulin kappa variable 6-21	KV621_HUMAN	NaN	NaN	NaN	22524.2	137137	57787.9	NaN	12230.2	10462.1	NaN	NaN	42797.1	47753.6	NaN	NaN	17472.8	NaN	690683	16798.7	NaN	NaN	1	27150.9	34120.5	29576.4	12881.5	NaN	59799.1	7213.09	44901.3	NaN	NaN	23394.3	NaN	NaN	11870.6	NaN	1	NaN	1	49349.1	NaN	NaN	NaN	13544.8	NaN
A0A0C4DH25	IGKV3D-20	Immunoglobulin kappa variable 3D-20	KVD20_HUMAN	303135	316270	983019	232612	5781503	915120	653794	408845	2767597	183538	437405	451588	483131	249976	693763	518384	405213	14285589	314201	97306.5	126271	344572	402883	NaN	620469	214559	716843	886771	569634	2207692	95292.6	550334	831096	91302.5	163567	338561	285450	99475.3	192720	675184	370289	444769	516846	305335	554443	567530
A0A0C4DH29	IGHV1-3	Immunoglobulin heavy variable 1-3	HV103_HUMAN	6788.16	NaN	141725	NaN	176806	13256	NaN	NaN	NaN	74758.9	6354.53	NaN	NaN	NaN	13498.7	417545	NaN	854125	76953.4	NaN	NaN	3876.67	NaN	12226.6	NaN	NaN	16982.4	NaN	NaN	733269	NaN	NaN	31056.8	NaN	NaN	91338.9	NaN	NaN	NaN	NaN	NaN	NaN	NaN	NaN	NaN	3986.95
A0A0C4DH31	IGHV1-18	Immunoglobulin heavy variable 1-18	HV118_HUMAN	NaN	NaN	166418	NaN	777413	NaN	262636	NaN	NaN	255793	NaN	NaN	NaN	NaN	152994	151950	138391	728043	55768.3	104131	NaN	188140	NaN	74778.5	61522.9	NaN	NaN	220400	138040	294221	NaN	NaN	396432	152372	45266.7	145291	42598	NaN	NaN	90760	NaN	NaN	273102	83764.1	127272	61908.3
A0A0C4DH32	IGHV3-20	Immunoglobulin heavy variable 3-20	HV320_HUMAN	NaN	NaN	NaN	NaN	NaN	NaN	NaN	NaN	NaN	NaN	NaN	NaN	NaN	NaN	NaN	NaN	NaN	25167.4	2028.03	NaN	NaN	NaN	NaN	NaN	NaN	NaN	NaN	NaN	NaN	NaN	NaN	NaN	NaN	NaN	NaN	NaN	NaN	NaN	NaN	NaN	NaN	NaN	NaN	NaN	NaN	NaN
A0A0C4DH33	IGHV1-24	Immunoglobulin heavy variable 1-24	HV124_HUMAN	NaN	NaN	40738	NaN	157728	NaN	56839.7	13654.4	NaN	NaN	NaN	11816.2	NaN	NaN	NaN	5787.49	52025.8	490044	5912.33	10897.5	NaN	NaN	NaN	9288.61	NaN	NaN	NaN	NaN	NaN	NaN	NaN	NaN	24991.9	NaN	NaN	NaN	NaN	NaN	NaN	NaN	NaN	NaN	16818.8	NaN	NaN	NaN
A0A0C4DH34	IGHV4-28	Immunoglobulin heavy variable 4-28	HV428_HUMAN	351882	25122.1	252326	76199.5	545176	95498.2	75843.7	61840.1	75560.3	128331	109137	158835	335414	379009	271237	290652	36474.5	2.51319e+06	121745	203363	122754	109603	84889.3	136341	152302	369220	158187	269454	201065	531447	73316.7	191145	516507	78216.1	75205.3	63884.3	68141.6	102639	168818	121630	196686	173987	451070	135194	184627	84469.8
A0A0C4DH35	IGHV3-35	Probable non-functional immunoglobulin heavy variable 3-35	HV335_HUMAN	NaN	NaN	NaN	NaN	291914	NaN	NaN	NaN	118813	NaN	64327.8	NaN	NaN	NaN	80211.7	NaN	NaN	851514	NaN	NaN	1.19808	NaN	1.04107	12405.4	NaN	NaN	7977.44	278446	9068.74	223242	NaN	1.13403	NaN	NaN	NaN	NaN	1.07838	1	NaN	NaN	NaN	NaN	NaN	NaN	38581.4	NaN
A0A0C4DH36	IGHV3-38	Probable non-functional immunoglobulin heavy variable 3-38	HV338_HUMAN	7365.42	NaN	1	NaN	3005258	NaN	NaN	2799.75	787289	NaN	1	1.04698	24334	NaN	2.07502	1	NaN	2.68298e+06	1	NaN	1.19808	NaN	NaN	NaN	10655.8	NaN	1.14763	192428	1.27138	576522	NaN	NaN	2760.57	NaN	1.21629	1.0817	NaN	44209.9	NaN	1	NaN	NaN	1	244771	38406	NaN
A0A0C4DH38	IGHV5-51	Immunoglobulin heavy variable 5-51	HV551_HUMAN	20231.9	86377.8	91125.7	31794.4	618687	32660.7	65520.1	9173.97	457309	51275.1	16399.7	88846.9	60223.5	21928.5	134653	78838.5	9376.45	1.87468e+06	47119.6	42948.5	22079.9	25645.6	50564.3	62844.8	120115	2948.46	91448.7	41997.8	13334.9	157658	11276.1	4027.55	133388	4597.48	2418.52	43942.4	10761.3	33663.1	35657.5	119967	43804.5	64498.4	192204	70540	75026.8	17815.1
A0A0C4DH39	IGHV1-58	Immunoglobulin heavy variable 1-58	HV158_HUMAN	NaN	NaN	NaN	NaN	NaN	NaN	NaN	NaN	NaN	NaN	NaN	NaN	NaN	NaN	NaN	NaN	NaN	NaN	NaN	NaN	NaN	NaN	NaN	NaN	1.27012	NaN	NaN	NaN	NaN	1682.51	NaN	NaN	35490	NaN	NaN	NaN	NaN	NaN	NaN	NaN	NaN	NaN	NaN	NaN	NaN	NaN
A0A0C4DH43	IGHV2-70D	Immunoglobulin heavy variable 2-70D	HV70D_HUMAN	1.39363	1.81311	6113.65	NaN	39063.2	1.24128	6982.09	1.21511	NaN	1	5704.57	NaN	1.05133	1.48831	2.07502	NaN	NaN	619710	1	1	1.19808	1	3113.33	27021.1	1.27012	NaN	NaN	1.6486	12067.9	NaN	1.03778	NaN	1.08332	1.23584	1.21629	1.0817	1.07838	1	1.35088	1	1.14119	1.61184	NaN	3117.1	1.65535	1.31997
A0A0C4DH67	IGKV1-8	Immunoglobulin kappa variable 1-8	KV108_HUMAN	117200	35034.6	108038	32218.8	702570	70839.8	43169.8	62448.2	233418	43524	348799	161414	38696.2	272983	127203	48383.9	60289.3	1440496	122025	105730	22339.2	75248.4	43746.9	91804.4	52824	175548	78994.9	178387	31240.4	311748	84549.2	82712	285541	56423.2	34394.6	48965.4	44249.5	47231	138256	36091.8	52957.1	123588	77090.3	34554.1	81240.9	128533
A0A0C4DH73;P01611	IGKV1-12;IGKV1D-12	Immunoglobulin kappa variable 1-12;Immunoglobulin kappa variable 1D-12	KV112_HUMAN;KVD12_HUMAN	NaN	28049.7	86369.2	32047.6	707038	100393	27311.7	14592.3	238422	50265.8	32923.2	53539.9	29220.1	NaN	68125.3	1	36925.7	1.01433e+06	119980	81075.8	NaN	15052.2	29517.3	18941.1	57849.6	NaN	42845	98503.5	1.27139	391839	17633.2	51604.1	135095	35110.4	33308.3	19617.2	12370.9	27877.6	NaN	307341	11248.7	105704	106434	260375	104325	55855.4
A0A0G2JRQ6		Ig-like domain-containing protein (Fragment)	A0A0G2JRQ6_HUMAN	NaN	6494.53	27662.1	NaN	557180	NaN	NaN	10742.5	NaN	NaN	NaN	152681	NaN	NaN	15386	NaN	NaN	977167	12785.1	33122.4	NaN	14146	NaN	1	NaN	NaN	NaN	68177.5	NaN	NaN	NaN	NaN	NaN	NaN	NaN	NaN	NaN	NaN	NaN	NaN	3670.92	26187.5	59485	37982.5	12370.8	3704.36
A0A0J9YW62		IGv domain-containing protein (Fragment)	A0A0J9YW62_HUMAN	NaN	NaN	NaN	38897.8	NaN	NaN	NaN	NaN	NaN	NaN	NaN	NaN	NaN	NaN	NaN	NaN	NaN	NaN	NaN	NaN	NaN	NaN	NaN	NaN	NaN	NaN	NaN	NaN	NaN	NaN	NaN	NaN	85298.1	NaN	NaN	NaN	NaN	NaN	NaN	NaN	NaN	NaN	NaN	NaN	NaN	NaN
A0A0J9YX35	IGHV3-64D	Immunoglobulin heavy variable 3-64D	HV64D_HUMAN	NaN	168787	661627	NaN	2.84091e+06	365558	684572	NaN	332333	NaN	851820	448727	NaN	NaN	189617	1.6043e+06	NaN	1.04827e+06	610220	NaN	303553	1.00794e+06	758157	508701	329349	NaN	841680	499673	593218	1.44495e+06	580375	671286	279722	NaN	875209	799411	486725	1.17957e+06	NaN	1.02759e+06	450346	NaN	611511	860846	284204	NaN
A0A0J9YXX1	IGHV5-10-1	Immunoglobulin heavy variable 5-10-1	HV5X1_HUMAN	153269	29105.3	209428	87774.1	1.85608e+06	114204	148358	314553	347256	127604	217990	33296.7	NaN	NaN	143014	200833	NaN	415120	68821.8	NaN	30312.3	73037.2	NaN	165103	NaN	182894	490849	806048	474356	21628	62769.9	NaN	NaN	NaN	NaN	57485	113147	95918.6	201651	255207	114703	231079	255135	NaN	92252.9	NaN
A0A0J9YY99		Ig-like domain-containing protein (Fragment)	A0A0J9YY99_HUMAN	196641	247204	571663	237919	4348713	285210	273069	246735	2016632	208003	359717	131229	274814	334698	591930	441092	347460	9668815	277494	297658	260061	246318	330555	460610	720673	385402	504267	756817	282147	2.94045e+06	233240	555682	615580	267956	306323	303844	211796	169896	1156182	306487	269852	326822	1.07791e+06	237794	414781	146765
A0A0K0K1A3;A0A0K0K1G8	TRBV10-1;TRBV10-2	T cell receptor beta variable 10-1;T cell receptor beta variable 10-2	TVBJ1_HUMAN;TVBJ2_HUMAN	48847.3	NaN	NaN	NaN	NaN	NaN	NaN	NaN	NaN	NaN	NaN	NaN	36725.5	31821.8	NaN	NaN	NaN	NaN	NaN	NaN	NaN	NaN	NaN	NaN	NaN	56799.4	NaN	NaN	NaN	NaN	NaN	NaN	NaN	NaN	NaN	NaN	NaN	NaN	NaN	NaN	NaN	NaN	NaN	NaN	NaN	NaN
A0A1B0GTU1;A0A8V8TLD8;O75152;P0DQW0	ZC3H11B;LOC441155;ZC3H11A;ZC3H11C	Zinc finger CCCH domain-containing protein 11B;Uncharacterized protein;Zinc finger CCCH domain-containing protein 11A;Zinc finger CCCH domain-containing protein 11C	ZC11B_HUMAN;A0A8V8TLD8_HUMAN;ZC11A_HUMAN;ZC11C_HUMAN	4943648	3.76395e+06	3.4065e+06	6122235	3.49428e+06	3.23401e+06	3677006	4006589	2.50053e+06	4721484	6354409	5.95136e+06	6.73995e+06	5954678	2.27719e+06	7.9447e+06	3.90013e+06	3.38716e+06	5459624	4713701	3.94272e+06	4312980	5.23339e+06	5385316	3.94327e+06	4989349	4.52287e+06	4.89399e+06	4.36384e+06	5466619	5122598	5457168	5.82568e+06	5.7877e+06	5.47952e+06	5523059	5.08951e+06	6.75635e+06	4.56522e+06	4.8995e+06	3.99448e+06	2.56272e+06	4038756	5.73171e+06	3.89423e+06	4.39948e+06
A0A1B0GUU1	C17orf113	Uncharacterized protein C17orf113	CQ113_HUMAN	NaN	NaN	NaN	NaN	NaN	NaN	NaN	NaN	NaN	NaN	NaN	NaN	NaN	NaN	NaN	NaN	NaN	NaN	NaN	NaN	NaN	NaN	NaN	NaN	NaN	NaN	NaN	NaN	NaN	NaN	NaN	NaN	NaN	NaN	NaN	NaN	NaN	NaN	NaN	NaN	NaN	NaN	NaN	NaN	NaN	NaN
A0A1B0GUW6	SPEM3	Uncharacterized protein SPEM3	SPEM3_HUMAN	36524.6	177353	64663.9	NaN	NaN	128364	96169	91703.5	127711	NaN	NaN	76671.6	NaN	NaN	79767.2	64363.6	NaN	NaN	47573.6	NaN	13414.2	21064.1	NaN	74624.3	NaN	43381.6	NaN	NaN	NaN	1	1.03778	29071.5	NaN	1.23584	12876	NaN	62686.9	19567	37552.9	NaN	100190	NaN	NaN	18835.4	NaN	20415
A0A1B0GVH7	IQCM	IQ domain-containing protein M	IQCM_HUMAN	NaN	1.81311	NaN	1.30709	NaN	NaN	52364.3	1.21511	NaN	8023.86	1	NaN	1.05133	NaN	NaN	38644.5	NaN	NaN	14729.6	18314.2	1.19808	52918.9	3250.53	NaN	1.27012	1.49744	1.14763	1.6486	5162.97	NaN	25660.1	1.13404	1.08332	1.23584	9209.96	26355.8	NaN	1	48701.3	9495.94	1.14119	41626.2	94847.8	NaN	NaN	1.31997
A0A1W2PPM1	CPHXL	Cytoplasmic polyadenylated homeobox-like protein	CPHXL_HUMAN	4606.52	1.81311	4737.99	30142.4	299612	16758.7	1	1.2151	2.70598	5793.82	10773.6	7210.63	17054	1.4883	5816.63	1	NaN	216732	1	1	16241.8	7723.18	1.04106	1	7322.81	5952.82	5092.6	1.64861	7899.54	143054	1.03778	12633.9	1.08333	13974.5	13827.4	6466.95	6076.25	7309.62	1.35088	10925.9	10357.5	1.61184	37215.5	1.03557	1.65534	8476.74
A0A1W2PR19	GSTT4	Glutathione S-transferase theta-4	GSTT4_HUMAN	2537.76	NaN	NaN	NaN	NaN	1.24128	1527.02	7724.44	NaN	NaN	NaN	NaN	1.05133	1748.2	NaN	NaN	NaN	NaN	1	NaN	NaN	NaN	NaN	4776.1	1.27012	NaN	NaN	NaN	NaN	NaN	NaN	NaN	NaN	8525.32	NaN	NaN	NaN	NaN	25844.6	11075.6	1.14119	NaN	NaN	NaN	7363.42	NaN
A0A2R8Y4L2;P09651;Q32P51	HNRNPA1L3;HNRNPA1;HNRNPA1L2	Heterogeneous nuclear ribonucleoprotein A1-like 3;Heterogeneous nuclear ribonucleoprotein A1;Heterogeneous nuclear ribonucleoprotein A1-like 2	RA1L3_HUMAN;ROA1_HUMAN;RA1L2_HUMAN	NaN	NaN	NaN	NaN	NaN	NaN	NaN	12946.5	NaN	NaN	NaN	NaN	NaN	NaN	NaN	NaN	NaN	NaN	NaN	NaN	21867.2	NaN	NaN	NaN	NaN	NaN	NaN	NaN	NaN	NaN	NaN	NaN	NaN	NaN	NaN	NaN	NaN	124983	NaN	NaN	NaN	NaN	NaN	NaN	NaN	NaN
A0A494C071	PWWP4	PWWP domain-containing 4	A0A494C071_HUMAN	134895	133644	96592.4	155795	41531	94298	138045	185392	171927	113636	152258	102082	128247	124437	90494.3	223414	85642.9	NaN	106905	120262	97611.6	174548	109836	65334.5	166352	212461	181362	81961.1	162986	158117	151018	117505	112778	132188	155353	147809	123460	212389	155455	173886	170585	94987.8	191253	245442	112858	87998.3
A0A494C0N9;A0A494C0Y3	FAM246B;FAM246A	Protein FAM246B;Protein FAM246A	F246B_HUMAN;F246A_HUMAN	NaN	NaN	NaN	NaN	NaN	NaN	NaN	NaN	NaN	NaN	NaN	NaN	32116.3	NaN	NaN	NaN	NaN	NaN	NaN	NaN	NaN	NaN	NaN	NaN	NaN	NaN	NaN	NaN	NaN	NaN	NaN	NaN	NaN	NaN	NaN	NaN	NaN	NaN	NaN	NaN	NaN	NaN	NaN	NaN	NaN	NaN
A0A5B6	TRBV28	T cell receptor beta variable 28	TVB28_HUMAN	NaN	NaN	NaN	1127.31	1.23112	4128.27	1736.13	1.21511	2.70596	1	1	986.871	NaN	NaN	902.854	1	NaN	1.03068	1	1	NaN	643.331	1.04106	1	NaN	NaN	NaN	NaN	1.27139	1	1.03778	NaN	1.08332	1.23584	1.21631	1036.24	1.07838	1	NaN	1	NaN	NaN	1	645.272	1.65533	1.31998
A0A5F9ZGZ6;Q12774	;ARHGEF5	ARHGEF5_35 domain-containing protein;Rho guanine nucleotide exchange factor 5	A0A5F9ZGZ6_HUMAN;ARHG5_HUMAN	41860.1	47693.9	16775.2	47038.7	1.23112	32549.3	29163	24133.4	66638.8	77701.5	25879	20794.1	26938.2	30734.1	2.07499	50217.9	4.31492	16063.3	19606.5	23003.5	19550.1	25600.8	22493.5	27763.8	10015.1	28828.1	11770.2	11727.3	6198.55	2601.74	51288.2	36987.9	31047.8	34905.8	31369.6	86307.4	9278.42	11490.8	57976.4	15201.2	12434.7	1.61184	27154.9	23749	29525.6	7965.69
A0A8I5KQE6;P08865	RPSAP58;RPSA	40S ribosomal protein SA	A0A8I5KQE6_HUMAN;RSSA_HUMAN	NaN	NaN	NaN	NaN	NaN	NaN	NaN	1.21511	NaN	NaN	NaN	NaN	NaN	NaN	NaN	NaN	NaN	NaN	NaN	NaN	1.19808	NaN	NaN	NaN	NaN	NaN	NaN	NaN	NaN	NaN	NaN	NaN	NaN	NaN	NaN	NaN	NaN	42013.3	NaN	NaN	NaN	NaN	NaN	NaN	NaN	NaN
A0AVT1	UBA6	Ubiquitin-like modifier-activating enzyme 6	UBA6_HUMAN	53464.8	NaN	7889.12	NaN	NaN	16329.7	12912.1	15099.9	NaN	14767.1	6516.6	NaN	56628.5	45178.4	5667.26	6.96029	69225.3	NaN	55074.1	20312.5	NaN	14551.2	NaN	20224.1	14223	42072.4	8910.82	34555.1	12733.2	NaN	15149.9	15546.6	27725.9	5822.7	NaN	NaN	23756.2	43631.2	42904.3	5163.04	35642.7	123242	NaN	9201.84	20150.2	25556.9
A0FGR9	ESYT3	Extended synaptotagmin-3	ESYT3_HUMAN	NaN	NaN	NaN	NaN	NaN	NaN	NaN	NaN	NaN	NaN	NaN	NaN	NaN	NaN	NaN	NaN	NaN	NaN	NaN	NaN	NaN	NaN	NaN	NaN	NaN	NaN	NaN	NaN	NaN	NaN	NaN	NaN	NaN	NaN	NaN	NaN	NaN	10723.7	NaN	NaN	NaN	NaN	NaN	NaN	NaN	NaN
A0M8Q6	IGLC7	Immunoglobulin lambda constant 7	IGLC7_HUMAN	950.542	36363.2	6680	2661.52	45620.2	39084.1	NaN	58817.4	NaN	1	2127.24	1.04698	1.05134	8425.44	36479.3	60861.4	NaN	8952.36	1	NaN	9524.28	1	NaN	10098.4	NaN	NaN	41398.8	46967.8	56370	9079.05	NaN	28535.8	NaN	NaN	1.21631	NaN	29743.2	6809.58	90065.9	1	49539.5	NaN	52460.5	47321.5	26969.3	NaN
A1L157	TSPAN11	Tetraspanin-11	TSN11_HUMAN	477577	NaN	NaN	NaN	NaN	25816.6	58816.5	NaN	3555.15	60948.5	NaN	NaN	243754	599479	78479.5	52215.6	NaN	NaN	72878.9	NaN	NaN	33486	NaN	46921.2	35164.7	707927	78662.3	96282.2	69870.2	NaN	48290.2	56595.9	NaN	NaN	NaN	NaN	NaN	71261.5	534900	16031.4	68578.8	NaN	9644.82	61533.7	61192.6	57377
A1L390	PLEKHG3	Pleckstrin homology domain-containing family G member 3	PKHG3_HUMAN	NaN	NaN	NaN	12071.6	NaN	NaN	NaN	NaN	NaN	NaN	NaN	NaN	NaN	NaN	NaN	NaN	NaN	NaN	NaN	NaN	NaN	NaN	NaN	NaN	NaN	NaN	NaN	NaN	NaN	NaN	NaN	NaN	NaN	NaN	NaN	NaN	NaN	NaN	NaN	NaN	13824.3	NaN	NaN	NaN	NaN	NaN
A1L4H1	SSC5D	Soluble scavenger receptor cysteine-rich domain-containing protein SSC5D	SRCRL_HUMAN	57359.6	23728.4	57849.8	16114.6	38886.4	12742.8	34212.4	27220.7	33089.1	39557.9	34337.4	31429.6	34313.4	44869.9	21770.6	64411.6	53620.8	104012	36748.7	58597.8	28435.6	36317.1	20256.7	54611.5	47592.6	45648.2	34714.6	25656.2	58825.3	46320.7	48787.9	13630.2	22167.3	18311.7	12802.3	16114.9	20605.4	19961.5	43529	43262.7	9212.13	16098	50759.1	59515.5	17888.5	24339.6
A2A3N6	PIPSL	Putative PIP5K1A and PSMD4-like protein	PIPSL_HUMAN	NaN	NaN	555996	NaN	381242	NaN	509120	NaN	NaN	466542	NaN	NaN	NaN	NaN	NaN	NaN	NaN	NaN	747827	NaN	NaN	NaN	NaN	NaN	629989	1.37328e+06	525454	NaN	NaN	NaN	NaN	NaN	NaN	644851	NaN	NaN	495126	807488	1.07319e+06	NaN	NaN	NaN	NaN	NaN	NaN	NaN
A2CJ06	DYTN	Dystrotelin	DYTN_HUMAN	434550	598180	263729	464539	119807	326845	440292	304207	332289	422613	346133	400412	403700	416650	629754	307553	276584	230844	349428	382786	324191	396282	371827	432257	412677	519581	525335	322806	547382	423600	336856	336072	427046	465261	481208	306170	329894	686031	457344	405730	339027	389129	436502	482847	443231	423912
A2NJV5	IGKV2-29	Immunoglobulin kappa variable 2-29	KV229_HUMAN	NaN	NaN	NaN	NaN	412360	NaN	NaN	NaN	165820	NaN	NaN	NaN	NaN	NaN	NaN	NaN	NaN	213053	NaN	NaN	NaN	NaN	NaN	NaN	NaN	NaN	52771.8	NaN	NaN	49345.4	NaN	NaN	NaN	NaN	NaN	NaN	NaN	NaN	NaN	8725.86	NaN	NaN	NaN	20739	NaN	NaN
A2PYH4	HFM1	Probable ATP-dependent DNA helicase HFM1	HFM1_HUMAN	NaN	NaN	NaN	NaN	NaN	NaN	NaN	NaN	NaN	NaN	NaN	NaN	NaN	NaN	NaN	NaN	NaN	108495	NaN	8319.8	NaN	NaN	NaN	NaN	9525.85	1.49744	NaN	NaN	7581.39	22581.1	NaN	NaN	20188	NaN	NaN	NaN	NaN	1381.5	NaN	NaN	NaN	NaN	NaN	NaN	NaN	NaN
A2RRP1	NBAS	NBAS subunit of NRZ tethering complex	NBAS_HUMAN	17072.3	29759.3	33039.4	58311.2	1.23112	1551.84	43987.2	49799.3	60515.2	1	33210.5	14905.7	1.05133	NaN	2.07499	63644.8	8854.79	1.03068	98483.3	37805.8	291793	78111.9	32934.9	4897.44	29160.1	1.49743	36297.9	56552	37768.3	18733	31232.3	31813.5	32733.3	47079.2	26647.5	24668.6	42825.3	19699.4	32330.5	51778.7	1.14119	102431	30946.9	105142	1.65533	23502.1
A2RUB1	MEIOC	Meiosis-specific coiled-coil domain-containing protein MEIOC	MEIOC_HUMAN	NaN	NaN	NaN	NaN	NaN	NaN	NaN	176.851	NaN	NaN	NaN	NaN	NaN	NaN	NaN	NaN	NaN	NaN	NaN	NaN	NaN	NaN	1.04106	NaN	NaN	NaN	NaN	NaN	NaN	NaN	NaN	NaN	NaN	NaN	NaN	NaN	10792.2	NaN	NaN	NaN	NaN	NaN	NaN	NaN	NaN	NaN
A3KMH1	VWA8	von Willebrand factor A domain-containing protein 8	VWA8_HUMAN	NaN	NaN	4335.03	19434.4	22672.7	31137.6	71733.9	136252	15797.4	179625	NaN	NaN	92554.2	331180	NaN	NaN	NaN	NaN	148940	321.062	20389.4	82509.7	89124.4	69200.1	119490	NaN	42857.4	174257	217475	65219.8	79870.5	16747.7	47147	64505.9	51116.6	118668	49351.2	2.18317e+06	277139	22931.5	NaN	25790.9	1	82886.7	135180	131026
A3QJZ7;P0DUQ1;P0DUQ2	PRAMEF27;PRAMEF15;PRAMEF9	PRAME family member 27;PRAME family member 15;PRAME family member 9	PRA27_HUMAN;PRA15_HUMAN;PRAM9_HUMAN	NaN	NaN	NaN	NaN	NaN	NaN	69585.5	1.71626e+06	NaN	NaN	NaN	NaN	NaN	NaN	NaN	NaN	685312	NaN	NaN	NaN	NaN	1	NaN	NaN	264430	7731.54	NaN	1.6486	NaN	NaN	284878	NaN	NaN	NaN	NaN	NaN	10332757	NaN	NaN	4211.95	NaN	89481.9	NaN	1.03556	NaN	162865
A4D1F6	LRRD1	Leucine-rich repeat and death domain-containing protein 1	LRRD1_HUMAN	1805421	2.70381e+06	1.51288e+06	1.71622e+06	356008	1518149	1370306	2.0981e+06	1383990	3383.28	NaN	914915	21388.8	1.64316e+06	1.39038e+06	1.59769e+06	1.33682e+06	203435	1.47801e+06	1.72511e+06	1.30765e+06	1.52842e+06	1.25535e+06	896463	1.50267e+06	1.53223e+06	1.22981e+06	1.05448e+06	1.16923e+06	951054	1.50261e+06	1.77589e+06	1244546	1.46988e+06	1.8542e+06	1.88712e+06	1.35967e+06	1.5672e+06	1.84178e+06	1.79356e+06	1.33598e+06	1.4741e+06	1.76209e+06	1.97427e+06	1.75603e+06	1682191
A4D2P6	GRID2IP	Delphilin	GRD2I_HUMAN	3.26307e+06	2.49581e+06	3131697	3.62606e+06	3.32602e+06	1.3887e+06	4538767	2394175	2.74929e+06	2.85123e+06	2.67566e+06	3.24733e+06	2.8841e+06	3786040	1.14112e+06	2.60536e+06	9180167	7.98801e+06	2.51819e+06	3.06603e+06	1.05906e+06	2.13807e+06	3.22953e+06	3.52412e+06	2.53673e+06	4.85669e+06	1.62361e+06	1.74739e+06	4897537	1.9625e+06	2.7285e+06	3.69191e+06	3636818	1.42986e+06	3.18684e+06	3.61187e+06	3.05394e+06	2.04164e+06	3.08453e+06	2.0667e+06	1.11541e+06	1.53783e+06	3.05127e+06	2.08428e+06	2.01947e+06	3.46949e+06
A4QN01	LINC01553	Putative uncharacterized protein encoded by LINC01553	CJ040_HUMAN	NaN	NaN	NaN	1.30708	NaN	NaN	NaN	NaN	NaN	NaN	NaN	NaN	NaN	NaN	NaN	63477.2	NaN	36510.8	NaN	NaN	14591.9	NaN	7377.4	18703.3	NaN	1.49744	NaN	NaN	NaN	NaN	3029.55	NaN	NaN	NaN	NaN	NaN	9057.32	NaN	NaN	NaN	NaN	NaN	NaN	NaN	NaN	NaN
A5D6W6	FITM1	Fat storage-inducing transmembrane protein 1	FITM1_HUMAN	111679	933422	207562	276320	106637	291582	264034	289516	572231	325451	166271	258101	370828	75173.1	316759	266317	484653	150620	398119	158079	245023	260126	235017	297732	243620	146525	181658	378430	547590	396933	188648	209519	303468	268885	297385	355038	362963	416918	142679	473634	273660	983155	264929	280985	359546	331347
A5D8W1	CFAP69	Cilia- and flagella-associated protein 69	CFA69_HUMAN	23184606	9422500	5.86693e+06	9980214	4574383	5.61239e+06	6.07081e+06	6618123	2774456	7.78932e+06	8814181	6546969	6671647	26753508	9443102	6.52912e+06	6567441	3.39395e+06	6.96154e+06	6.80101e+06	4.11241e+06	8.15084e+06	6575721	4024077	4947161	23720950	9571138	11867234	7782614	4296009	6254586	5.56599e+06	11494234	6.43182e+06	7.55263e+06	7935148	6.12333e+06	8.35794e+06	25007656	8.27473e+06	6.05375e+06	14633058	6.02098e+06	13700667	7702677	8762448
A5PLL7	PEDS1	Plasmanylethanolamine desaturase	PDES1_HUMAN	54237.7	NaN	22029.3	29889	16942	15025.7	14915.8	19300.4	NaN	11554.8	22471	22355.9	12165	3399.29	20945.5	52745	NaN	14783.4	14878.3	18048.4	21646.7	5345.27	39793.1	12865.5	NaN	39233	30438	16021.5	40773.6	25207.9	31956.6	28179.7	31141.8	33025.6	34777.2	27242.2	15440.2	11581.9	48050.3	NaN	46846.6	18224.7	54207	11782.6	16986.1	27971.4
A5PLN9	TRAPPC13	Trafficking protein particle complex subunit 13	TPC13_HUMAN	NaN	NaN	NaN	762487	NaN	823188	491160	NaN	1.88798e+06	NaN	NaN	NaN	NaN	NaN	933952	NaN	1.08309e+06	NaN	642654	NaN	148034	NaN	1.97603e+06	1.68991e+06	1.27012	NaN	NaN	1.56843e+06	628521	NaN	544862	1.20452e+06	NaN	NaN	1.002e+06	NaN	263214	15234.5	1.02238e+06	523254	154615	NaN	501787	NaN	NaN	NaN
A5X5Y0	HTR3E	5-hydroxytryptamine receptor 3E	5HT3E_HUMAN	NaN	NaN	3.5219e+06	NaN	NaN	303665	NaN	NaN	NaN	424312	NaN	NaN	NaN	NaN	NaN	NaN	NaN	NaN	NaN	NaN	NaN	NaN	NaN	NaN	NaN	NaN	101323	NaN	1.29188e+06	NaN	NaN	NaN	NaN	NaN	928173	NaN	NaN	NaN	NaN	NaN	NaN	NaN	NaN	NaN	NaN	NaN
A5YKK6	CNOT1	CCR4-NOT transcription complex subunit 1	CNOT1_HUMAN	1.39363	17627.6	NaN	NaN	NaN	NaN	6637.27	17645.5	23105.8	2632.18	2866.06	NaN	2620.88	6814.74	NaN	1	91868.3	12093.9	11616.1	2053.5	8176.81	14823.2	9506.82	NaN	NaN	5050.93	1.14764	NaN	9261.45	1	14083.2	14230.3	NaN	27673.2	10580.6	12099.2	530893	NaN	12697.6	12140.9	45717.4	NaN	NaN	171.263	66068.8	1.31998
A6H8Y1	BDP1	Transcription factor TFIIIB component B'' homolog	BDP1_HUMAN	NaN	76170	386487	52239.7	13934.6	62583.2	48669.2	383097	182903	133247	446820	2789.23	52054.2	NaN	2.075	29085.2	4.31492	NaN	32440.2	13389.5	7241.4	71374.7	33374.2	11620.4	1.27012	NaN	NaN	704309	48137.2	168414	23706.7	11901.8	62832	82020.2	222202	304381	175173	59908.1	1.34974e+06	126273	155033	242928	234693	305606	182300	97266.4
A6NC57	ANKRD62	Ankyrin repeat domain-containing protein 62	ANR62_HUMAN	NaN	215341	NaN	NaN	NaN	NaN	NaN	NaN	581378	NaN	NaN	89899.5	NaN	NaN	NaN	NaN	55771.8	NaN	NaN	NaN	NaN	NaN	NaN	NaN	18304.6	NaN	NaN	NaN	NaN	8148.34	NaN	NaN	NaN	NaN	NaN	NaN	NaN	NaN	NaN	7176.66	NaN	NaN	NaN	NaN	50536.5	NaN
A6NC98	CCDC88B	Coiled-coil domain-containing protein 88B	CC88B_HUMAN	845583	143606	99827.6	NaN	NaN	150630	104798	302986	121944	NaN	277185	NaN	122960	959069	92181.2	96924.4	66722	NaN	108929	154272	117105	103195	NaN	NaN	133171	1.10606e+06	172703	NaN	NaN	NaN	NaN	59947.9	264415	NaN	NaN	254252	102966	153184	954151	122449	80170.8	823999	NaN	388787	NaN	NaN
A6NCI4	VWA3A	von Willebrand factor A domain-containing protein 3A	VWA3A_HUMAN	6.52748e+06	2.54458e+06	NaN	5.47528e+06	NaN	NaN	NaN	NaN	NaN	NaN	NaN	3.38733e+06	4206245	293929	NaN	NaN	4.09118e+06	NaN	2.17014e+06	4996023	104084	825199	107418	3.36031e+06	93099.7	4750519	121452	2936537	3.50088e+06	NaN	861444	5.789e+06	NaN	NaN	6629161	2.1972e+06	1.28787e+06	3499971	6.44996e+06	NaN	2.28617e+06	5.30699e+06	NaN	NaN	3.27954e+06	144722
A6ND36	FAM83G	Protein FAM83G	FA83G_HUMAN	NaN	1621.95	NaN	NaN	NaN	NaN	4617.74	NaN	NaN	4917.54	NaN	NaN	NaN	NaN	NaN	NaN	NaN	NaN	1	14634.6	NaN	NaN	NaN	NaN	NaN	17586.4	NaN	NaN	NaN	6337.91	11359.5	NaN	NaN	NaN	NaN	NaN	NaN	NaN	6770.18	NaN	NaN	NaN	NaN	4955.67	NaN	6498.18
A6NDB9	PALM3	Paralemmin-3	PALM3_HUMAN	NaN	NaN	NaN	NaN	NaN	24736.5	15024.4	16298.5	NaN	NaN	NaN	NaN	NaN	NaN	NaN	NaN	NaN	NaN	NaN	NaN	NaN	NaN	NaN	NaN	NaN	NaN	8626.66	NaN	NaN	NaN	NaN	NaN	NaN	NaN	21284.3	NaN	NaN	NaN	NaN	NaN	NaN	NaN	30580.4	NaN	15764.2	NaN
A6NDG6	PGP	Glycerol-3-phosphate phosphatase	PGP_HUMAN	NaN	NaN	NaN	NaN	NaN	NaN	NaN	NaN	NaN	NaN	NaN	NaN	NaN	NaN	NaN	NaN	NaN	NaN	NaN	NaN	NaN	NaN	NaN	NaN	NaN	NaN	NaN	NaN	NaN	NaN	NaN	NaN	NaN	NaN	NaN	NaN	NaN	NaN	NaN	NaN	NaN	NaN	NaN	NaN	NaN	NaN
A6NEQ2	FAM181B	Protein FAM181B	F181B_HUMAN	NaN	NaN	NaN	24756.9	23637.5	16007.4	NaN	NaN	NaN	NaN	NaN	5434.32	NaN	NaN	NaN	2637.2	NaN	NaN	6354.05	NaN	14494.4	NaN	NaN	NaN	NaN	27554.7	NaN	NaN	67509	NaN	NaN	NaN	NaN	NaN	NaN	NaN	NaN	NaN	NaN	NaN	30705.6	NaN	NaN	NaN	NaN	NaN
A6NFI3	ZNF316	Zinc finger protein 316	ZN316_HUMAN	61983.6	31349	45988.7	54064.8	32094	52056.3	54881.2	52310.4	NaN	55588.5	46831.1	63446.4	35572	101358	54957.5	130128	44047.8	11653.2	40605	60448.3	74429.5	39831	NaN	48649.3	47154.7	99761.2	68185.8	NaN	NaN	54699.6	34738.1	61476.2	65263.1	52962.6	80816.4	89864.9	33261	34497.2	71852.7	NaN	NaN	NaN	36202.9	50194.3	NaN	33078.3
A6NGS2	ERICH4	Glutamate-rich protein 4	ERIC4_HUMAN	NaN	NaN	NaN	NaN	NaN	NaN	NaN	NaN	NaN	NaN	1	NaN	40211.7	NaN	NaN	74137.8	NaN	NaN	NaN	NaN	NaN	NaN	NaN	NaN	NaN	NaN	NaN	63350.3	NaN	NaN	NaN	NaN	NaN	NaN	1.21631	NaN	NaN	1	NaN	NaN	NaN	NaN	NaN	NaN	NaN	NaN
A6NHC0	CAPN8	Calpain-8	CAN8_HUMAN	88976.8	219965	193056	142274	338011	170368	126281	153452	530902	151495	109497	75537.1	31284.4	42407.1	380871	52892.1	229322	NaN	95759.7	161556	68183.2	66543.4	NaN	112621	92103.5	58005.9	63967	76519.6	86848.8	NaN	NaN	NaN	65389.9	94427.9	81170.2	108407	177476	216986	107882	472433	1.14119	216553	117217	210207	316993	199374
A6NHG4	DDTL	D-dopachrome decarboxylase-like protein	DDTL_HUMAN	218055	87675	159297	186936	48488.5	132443	355056	168086	112832	294061	185185	196572	144667	202215	203889	199723	155814	133527	175822	205444	1.02026e+06	187264	112611	116620	126454	237547	144838	277350	252373	113058	316648	121778	149577	104515	85582.7	204053	584838	153983	208794	177229	129552	237990	258190	254435	127333	125630
A6NHQ2	FBLL1	rRNA/tRNA 2'-O-methyltransferase fibrillarin-like protein 1	FBLL1_HUMAN	27414.1	NaN	29153.9	NaN	310416	95960	16125.3	43553.5	46334	26262.4	5470.39	38680.1	NaN	NaN	28113.7	NaN	NaN	104363	39036.6	20451.7	NaN	NaN	NaN	16645.9	NaN	16986	13583.7	20714.8	NaN	35291.2	NaN	NaN	47739.5	NaN	53849.2	9624.51	16851	38827.9	33891.7	NaN	72084.6	NaN	NaN	46105.8	86261.1	47308.1
A6NI56	CCDC154	Coiled-coil domain-containing protein 154	CC154_HUMAN	571099	1.71962e+06	894940	1.47275e+06	NaN	NaN	937842	40623.8	2.70598	312034	164772	494841	552715	806624	1.00109e+06	991556	846439	NaN	130289	56459.7	556302	1.16946e+06	283058	189842	1.22645e+06	778238	2.02915e+06	581854	1.83575e+06	NaN	1.05202e+06	1.272e+06	866.914	1.32479e+06	298307	165244	850200	NaN	285354	109925	1.59123e+06	NaN	31121.4	1.00771e+06	384875	1.01303e+06
A6NI73	LILRA5	Leukocyte immunoglobulin-like receptor subfamily A member 5	LIRA5_HUMAN	1.39363	1.81311	4369.96	1.30709	NaN	NaN	1	18418.8	NaN	7500.43	9226.35	2808.44	NaN	NaN	NaN	16975.3	6173.72	NaN	5255.79	3968.42	24008.4	1	NaN	5276.16	1.27012	10936.1	NaN	13711.8	1.27138	23277.2	1.03778	NaN	3682.42	NaN	NaN	1.0817	2849.41	13969.1	NaN	5079.25	1.14119	7083.94	7917.07	198127	14172.7	11082.2
A6NIK2	LRRC10B	Leucine-rich repeat-containing protein 10B	LR10B_HUMAN	NaN	38639.7	12952.2	17453	NaN	NaN	1365.77	4363.56	85735.7	1	23929.2	NaN	NaN	NaN	2.07502	7139.43	NaN	2898.64	1	1	4256.39	52602.1	2935.96	NaN	89784	NaN	NaN	8749	32692.2	61524.9	NaN	20910.2	7998.49	NaN	21315.8	10758.4	1.07838	12262.1	NaN	114306	38501.2	NaN	7403.45	1.03556	12488.4	48574.2
A6NKQ9;P0DN86;P0DN87;Q6NT52	CGB1;CGB8;CGB7;CGB2	Choriogonadotropin subunit beta variant 1;Choriogonadotropin subunit beta 3;Choriogonadotropin subunit beta 7;Choriogonadotropin subunit beta variant 2	CGB1_HUMAN;CGB3_HUMAN;CGB7_HUMAN;CGB2_HUMAN	NaN	NaN	NaN	NaN	NaN	NaN	NaN	NaN	NaN	NaN	NaN	NaN	NaN	NaN	NaN	NaN	NaN	NaN	NaN	NaN	NaN	NaN	NaN	NaN	NaN	NaN	NaN	NaN	NaN	NaN	NaN	NaN	NaN	NaN	NaN	NaN	NaN	NaN	NaN	NaN	NaN	NaN	NaN	NaN	NaN	NaN
A6NLU0;F8VTS6	RFPL4A;RFPL4AL1	Ret finger protein-like 4A;Ret finger protein-like 4A-like protein 1	RFPLA_HUMAN;RFAL1_HUMAN	14604.1	NaN	76903.6	54774.5	NaN	1.0318e+06	NaN	48559.6	NaN	911194	47685.5	721065	65986.1	450950	47253.1	78307.6	146774	NaN	44977.1	75305.8	84346.2	70976.4	692240	57292.2	56269.6	19951.8	50939.9	53016.6	37031.8	NaN	60784.6	52240	41413.7	NaN	41923	84219.3	469431	69014.9	37411.8	637522	40936.9	NaN	30667.8	889152	971615	45229
A6NML5	TMEM212	Transmembrane protein 212	TM212_HUMAN	110258	97160.8	64442.6	99664.2	NaN	48303.4	71155.3	NaN	117768	88489.2	NaN	82543.7	86914.3	94969.7	NaN	63576.3	NaN	114274	72996.7	88873.7	55109.2	68082.6	48632	104152	127371	139961	69004.2	NaN	166142	92785.5	NaN	156825	NaN	115735	24395	90671.4	115474	60967.2	77936.8	70958.5	53560.7	70465.9	89999.5	59061.9	43520.9	140302
A6NNM8	TTLL13	Tubulin polyglutamylase TTLL13	TTL13_HUMAN	145463	NaN	57795.9	220099	108400	143435	60395.8	NaN	NaN	53552.8	NaN	89148.7	NaN	221371	NaN	36008.5	NaN	NaN	122610	69873.6	52530.3	129326	111399	137488	208395	154293	135745	252684	197760	NaN	67055.3	108742	NaN	107563	157002	49438.8	144501	58347.5	147335	79469.3	84645	196237	35882	51434.6	177681	102220
A6PVS8	LRRIQ3	Leucine-rich repeat and IQ domain-containing protein 3	LRIQ3_HUMAN	NaN	NaN	NaN	NaN	10014.7	NaN	NaN	NaN	NaN	NaN	NaN	12829.8	NaN	NaN	15648.3	NaN	NaN	NaN	NaN	NaN	NaN	NaN	32621.3	6437.03	9227.86	56186	14400.9	21472.8	43680.7	24613.1	NaN	NaN	NaN	NaN	NaN	NaN	NaN	NaN	NaN	NaN	NaN	137956	NaN	NaN	NaN	NaN
A8K2U0	A2ML1	Alpha-2-macroglobulin-like protein 1	A2ML1_HUMAN	1.39363	NaN	1	128009	NaN	NaN	1.50391	28395.8	2.70596	898.184	NaN	1.04697	NaN	NaN	2.07499	NaN	NaN	NaN	37.0799	NaN	15188.7	5127.94	NaN	2440.92	1.27012	NaN	NaN	161.417	NaN	1	NaN	54.5126	1.08332	NaN	1.21631	NaN	NaN	21168.6	NaN	1	60.4558	1.61184	1	16.1235	1.65533	NaN
A8K7I4	CLCA1	Calcium-activated chloride channel regulator 1	CLCA1_HUMAN	1.39363	NaN	1402.85	NaN	NaN	NaN	NaN	NaN	9591.45	51711.4	NaN	8991.36	NaN	8077.46	NaN	NaN	NaN	NaN	NaN	NaN	NaN	1	NaN	NaN	NaN	NaN	NaN	15624.3	NaN	NaN	1.03778	NaN	36456.9	NaN	NaN	86369.6	NaN	5450.44	NaN	NaN	NaN	1.61184	NaN	91600.8	NaN	NaN
A8MPY1	GABRR3	Gamma-aminobutyric acid receptor subunit rho-3	GBRR3_HUMAN	NaN	NaN	NaN	NaN	NaN	NaN	76383.4	23408	NaN	NaN	NaN	NaN	NaN	NaN	NaN	NaN	NaN	NaN	NaN	NaN	NaN	48035.2	NaN	30843.2	NaN	NaN	NaN	NaN	NaN	175097	46207.3	33436.4	56873.4	50126.8	NaN	63542.3	24127.6	29807.8	50276.3	NaN	NaN	NaN	NaN	39601.6	NaN	NaN
A8MT33	SYCE1L	Synaptonemal complex central element protein 1-like	SYC1L_HUMAN	5700.98	81444.7	135414	48893.3	206067	91568.7	263188	134076	595916	75452.8	171413	76496.4	73703.4	46103	39366	159194	44319.1	180442	62657.8	35803	145847	119402	112234	214485	201134	34899.8	62613	59652.1	153898	248604	82338	175750	40575.4	98976.2	85461.9	79556.7	113721	123778	31981.4	179598	107049	18652.2	58009.2	50457.6	76013.1	184991
A8MU93	C17orf100	Uncharacterized protein C17orf100	CQ100_HUMAN	34643.1	NaN	31926.1	NaN	NaN	NaN	37325.1	5186.19	NaN	123201	NaN	5191.12	NaN	46199	NaN	98025.6	NaN	NaN	20893.7	3508.65	79129.7	21926.3	9697.74	863.289	NaN	43955.2	3448.39	4010.02	NaN	NaN	NaN	NaN	67925.3	NaN	2643.7	267454	39361.9	77405.7	NaN	6034.83	1.14119	42499.5	28362.2	91448.1	NaN	NaN
A8MVW5	HEPACAM2	HEPACAM family member 2	HECA2_HUMAN	NaN	NaN	73135.7	NaN	NaN	59941.7	NaN	74659.8	NaN	NaN	1	19882.6	NaN	NaN	10276	1	NaN	NaN	115782	NaN	2216843	98440.5	NaN	NaN	5964.3	NaN	5484.33	17398.2	65082.4	NaN	130444	NaN	NaN	57315.9	26502.2	NaN	NaN	NaN	NaN	NaN	55448.1	108899	NaN	NaN	21412.1	11545.3
A8MVX0	ARHGEF33	Rho guanine nucleotide exchange factor 33	ARG33_HUMAN	132531	NaN	NaN	110727	NaN	NaN	NaN	NaN	NaN	NaN	NaN	5683.24	NaN	17902.9	NaN	NaN	NaN	NaN	NaN	NaN	NaN	1	5359.18	NaN	NaN	NaN	NaN	7395.82	NaN	NaN	NaN	NaN	NaN	NaN	NaN	NaN	NaN	NaN	NaN	168537	NaN	NaN	NaN	NaN	NaN	NaN
A8MX76	CAPN14	Calpain-14	CAN14_HUMAN	129301	NaN	NaN	17600.3	115526	28356.9	90965.2	72202.3	NaN	13803.8	116483	36347.1	540667	158331	136199	NaN	83454.7	NaN	95757.2	119442	49313.1	35351.7	10306.7	64641.9	35209.3	109798	160333	65949.3	31934.7	89987.8	74187.5	NaN	30997.8	23947.3	NaN	13295.3	31425	75663.3	104461	30573.1	81547.3	NaN	8814.36	13840.6	43908.8	51628.2
A8MYA2	CXorf49B	Uncharacterized protein CXorf49	CX049_HUMAN	181407	NaN	74376.5	198378	NaN	130071	107816	97663.5	50538.8	113937	112705	185049	125957	171572	138438	101332	NaN	NaN	104783	93442.3	131666	121972	116059	80439.9	72037.4	121591	135489	NaN	170882	NaN	143859	188865	104700	NaN	150952	186845	108849	100950	148082	132083	158595	203533	75029.4	216458	155052	127492
A8MYZ0	MINDY4B	Inactive ubiquitin carboxyl-terminal hydrolase MINDY-4B	MIY4B_HUMAN	NaN	NaN	NaN	23952.2	NaN	NaN	NaN	23334.5	NaN	NaN	400.811	NaN	NaN	NaN	NaN	NaN	NaN	NaN	NaN	28847.3	NaN	NaN	NaN	NaN	NaN	NaN	12533	NaN	NaN	NaN	NaN	NaN	NaN	NaN	NaN	9690.15	NaN	799.869	NaN	NaN	NaN	60097.9	NaN	NaN	1.65533	NaN
A9YTQ3	AHRR	Aryl hydrocarbon receptor repressor	AHRR_HUMAN	230172	392229	912649	410750	64134	255103	1.05201e+06	699316	222977	3.97852e+06	376626	355018	347463	602070	502630	2852494	527840	174080	1100571	571788	222167	1.05458e+06	431394	448177	563517	551062	366651	151269	319145	212988	245713	427510	3002528	414687	469984	1.30462e+06	1.38521e+06	900738	2.10754e+06	431470	301543	2.72301e+06	453615	2.77181e+06	217195	335069
B0FP48;E5RIL1	UPK3BL1;UPK3BL2	Uroplakin-3b-like protein 1;Uroplakin-3b-like protein 2	UPK3L_HUMAN;UPKL2_HUMAN	NaN	494.927	38216.5	52536.5	NaN	NaN	6041.32	1.21511	NaN	1	NaN	1.04698	NaN	NaN	2.07502	105293	NaN	NaN	21469.2	24957.6	1.19808	189955	NaN	63190.8	97.9189	1.49744	32330	57621.4	24230.4	63549.4	26927.7	29759.7	41198	20585.7	22630.6	114221	51110.7	26625.3	34423.2	140769	7681.19	51128.7	287326	115029	19001.3	8365.62
B2CW77	KLLN	Killin	KILIN_HUMAN	57579.5	69650.4	14973.3	85293.9	30933	32489.8	149561	24625.2	29722.8	30421.3	37626.6	57443.6	66627.4	71143.2	215360	64890	269378	NaN	24086.9	50505.2	80894.4	43906.8	50316.1	112864	75444.3	60828.6	28443.3	66281.4	32485.1	7974.49	31586.9	61103.3	25655.2	35365.8	68384.5	39702.1	41938.2	34150.7	90276.4	17000.9	61918.7	36169	14586.3	32618.6	55926.2	32869.6
B3EWG3;B3EWG5;B3EWG6	FAM25A;FAM25C;FAM25G	Protein FAM25A;Protein FAM25C;Protein FAM25G	FM25A_HUMAN;FM25C_HUMAN;FM25G_HUMAN	NaN	NaN	NaN	NaN	NaN	NaN	NaN	NaN	NaN	NaN	NaN	NaN	NaN	NaN	NaN	NaN	NaN	NaN	NaN	NaN	NaN	NaN	NaN	NaN	NaN	NaN	NaN	NaN	NaN	NaN	NaN	NaN	NaN	NaN	NaN	NaN	NaN	NaN	NaN	NaN	NaN	NaN	NaN	NaN	NaN	NaN
B4DU55	ZNF879	Zinc finger protein 879	ZN879_HUMAN	348776	93623.9	70911.3	152226	101587	77534.8	22114.8	167678	115794	NaN	19456.8	24406.9	16767.8	346146	100382	105216	155634	58924.7	44230.3	134147	5141.59	122290	124840	NaN	174307	352952	181702	49251.9	211898	NaN	99200.1	168608	NaN	27300.2	65647.4	108712	167588	53116.8	NaN	115588	181647	246707	42427.3	279286	122599	NaN
B5MCY1	TDRD15	Tudor domain-containing protein 15	TDR15_HUMAN	NaN	51023.6	24303.7	NaN	NaN	68990.4	NaN	NaN	NaN	49829.3	23492.2	NaN	35242	NaN	NaN	31198.7	NaN	NaN	NaN	NaN	NaN	NaN	51663.4	NaN	NaN	NaN	39670.6	NaN	NaN	NaN	NaN	NaN	NaN	45413.3	NaN	51614.7	35417.9	22130.8	NaN	52304.4	73483.8	31400.6	NaN	21472.1	16879.1	NaN
B9A064	IGLL5	Immunoglobulin lambda-like polypeptide 5	IGLL5_HUMAN	1.40575e+06	1.03984e+06	1.79766e+06	982946	10233724	348143	947808	1770407	2.58455e+06	635051	1.09966e+06	625773	1121005	1.46685e+06	1.34213e+06	1.12725e+06	1.42602e+06	19495662	808909	623397	273367	1.10069e+06	840048	1073711	2.18575e+06	1522604	1.55377e+06	2.00393e+06	1.24234e+06	4703489	354766	892265	1473719	348962	629669	932303	476806	805671	936575	1.20341e+06	802873	943424	1.7772e+06	1.38631e+06	807380	778314
C9JL84	HHLA1	HERV-H LTR-associating protein 1	HHLA1_HUMAN	NaN	58245.7	20018.3	155808	137814	109581	113538	172184	331909	7398.83	131504	NaN	70144.7	248331	87097.1	410484	140597	144624	133836	167185	207055	179738	133812	101508	99945.2	238841	148105	NaN	78066.2	71553	219920	222068	253558	239808	221993	264167	133138	NaN	242445	140188	130179	162251	142083	297487	105290	98856.3
D6REC4	CFAP99	Cilia- and flagella-associated protein 99	CFA99_HUMAN	NaN	22487.8	NaN	NaN	NaN	NaN	NaN	NaN	385097	NaN	NaN	NaN	NaN	NaN	NaN	NaN	NaN	NaN	NaN	NaN	NaN	NaN	NaN	NaN	NaN	NaN	NaN	NaN	NaN	NaN	NaN	NaN	NaN	NaN	NaN	16943.6	NaN	NaN	NaN	NaN	NaN	NaN	NaN	NaN	NaN	NaN
E9PAV3	NACA	Nascent polypeptide-associated complex subunit alpha, muscle-specific form	NACAM_HUMAN	352257	192516	146572	260886	203111	131798	121578	141130	169430	318060	192679	244837	157808	255369	197404	136430	827995	NaN	199204	NaN	43623.7	148529	204025	197241	215303	271703	165882	288903	298568	197959	172704	240376	266184	236154	144801	158230	295207	165354	246573	142484	232822	397936	170883	261574	143833	204687
F2Z333	FNDC10	Fibronectin type III domain-containing protein 10	FND10_HUMAN	390960	37130760	1	18443896	NaN	14864524	4043188	12974805	38231476	4588850	3.14491e+06	8948669	4951185	2.86433e+06	4.50275e+06	5640232	64703448	NaN	6.91074e+06	7838849	11952315	8602650	2502010	4.08779e+06	5701147	401162	8941415	8588395	3.22433e+06	1.87655e+06	3587113	11156630	4.93726e+06	12892660	3304095	5.83957e+06	2484902	6058715	8.25057e+06	7921834	14121154	28830482	25731940	12570821	24305896	29898634
M0R2J8	DCDC1	Doublecortin domain-containing protein 1	DCDC1_HUMAN	5608845	2.88878e+06	3139115	2.24618e+06	1.88095e+06	2.85206e+06	2.42166e+06	3.25176e+06	416752	2.13755e+06	2746242	3.22371e+06	1.05864e+06	5759207	2.8267e+06	2525271	536483	3.03461e+06	3253321	3.07944e+06	1.61245e+06	3.32298e+06	2.71044e+06	2.37969e+06	3.58242e+06	6258663	4262275	2.06275e+06	5.53201e+06	2.11348e+06	3711727	2.8143e+06	1.53487e+06	2.73369e+06	3.81775e+06	3.59212e+06	2.76863e+06	5417792	6.55237e+06	3.69413e+06	3.0525e+06	2.5659e+06	2704899	1.31815e+06	2.13949e+06	3.63055e+06
O00115	DNASE2	Deoxyribonuclease-2-alpha	DNS2A_HUMAN	NaN	NaN	NaN	NaN	NaN	110936	207713	NaN	NaN	NaN	NaN	1.04698	NaN	NaN	NaN	NaN	NaN	NaN	NaN	NaN	82579.9	152553	160965	NaN	NaN	NaN	NaN	NaN	NaN	NaN	NaN	NaN	NaN	NaN	NaN	NaN	131583	NaN	NaN	41658.1	NaN	NaN	NaN	45727.1	29915.6	NaN
O00142	TK2	Thymidine kinase 2, mitochondrial	KITM_HUMAN	970484	356524	432889	210964	257884	263563	257426	448810	748462	496284	682581	997830	275631	1.11121e+06	377149	383948	246256	126543	436490	384689	311715	416251	357782	152250	242074	554860	377099	399563	168712	192269	524197	276860	394961	459283	251825	247921	372352	250513	995299	623611	402211	634079	264069	805430	655947	517269
O00151	PDLIM1	PDZ and LIM domain protein 1	PDLI1_HUMAN	185127	25491.1	11495.6	31440.6	62589.5	120059	NaN	19520.3	NaN	NaN	NaN	22381	NaN	NaN	NaN	NaN	NaN	25622.5	NaN	NaN	NaN	NaN	NaN	NaN	NaN	NaN	NaN	NaN	NaN	NaN	NaN	NaN	33176.4	NaN	109716	NaN	16608.9	NaN	NaN	29170.7	36726	NaN	NaN	201054	115527	342510
O00160	MYO1F	Unconventional myosin-If	MYO1F_HUMAN	NaN	NaN	2366	1.30707	NaN	NaN	NaN	22208.2	NaN	NaN	1	3797.45	5575.18	NaN	2.07499	1	41330.2	NaN	NaN	NaN	14231.4	467.867	9678.97	1	1407.92	1.49742	NaN	23014.8	9287.66	NaN	1.03778	NaN	1.08332	12448.7	NaN	NaN	NaN	NaN	1.35088	11628.2	NaN	NaN	NaN	1.03556	NaN	22390.5
O00187	MASP2	Mannan-binding lectin serine protease 2	MASP2_HUMAN	3.85555e+06	5151461	3107251	2.87669e+06	3398074	3372743	3.25973e+06	4355935	3.71761e+06	2.66029e+06	2.16139e+06	2.81646e+06	2.966e+06	4.58102e+06	2577454	4.02927e+06	1.52246e+06	4.68197e+06	3571188	2.85188e+06	3563721	3.30012e+06	3.36523e+06	4.6234e+06	2405435	5.08311e+06	3298423	2.70797e+06	4.15069e+06	5.28051e+06	3195558	2.87178e+06	4507935	4.39864e+06	3.33302e+06	3.16301e+06	2892438	2694852	4484454	3.73577e+06	2.8428e+06	4.03549e+06	4077573	2.12508e+06	2744407	2.69371e+06
O00189	AP4M1	AP-4 complex subunit mu-1	AP4M1_HUMAN	100003	31930	32241.1	50290.6	6182.14	26526	39583.6	39261.5	NaN	51027.9	38665.4	31020.5	30808.4	80438.2	34616.2	64790.1	38589.5	NaN	36579.3	41979.2	37236.3	27691	31943.4	14063.9	16187.5	91802.4	30460	40671.5	28578.5	17367.6	28117.8	43309.6	58154	43634.7	47179.6	52821.1	25096.5	26886.7	104797	9917.43	36156.6	NaN	44179.5	57563.8	38623.5	27818
O00194	RAB27B	Ras-related protein Rab-27B	RB27B_HUMAN	NaN	NaN	NaN	NaN	NaN	1306.74	NaN	NaN	NaN	1833.85	NaN	NaN	NaN	NaN	NaN	NaN	NaN	NaN	NaN	NaN	NaN	NaN	NaN	NaN	NaN	NaN	NaN	NaN	NaN	NaN	NaN	NaN	1.08332	NaN	NaN	NaN	NaN	NaN	NaN	NaN	1.14119	NaN	NaN	3112.9	1.65535	NaN
O00204	SULT2B1	Sulfotransferase 2B1	ST2B1_HUMAN	1811548	NaN	NaN	3.97016e+06	3.10325e+06	927865	2.57716e+06	796606	NaN	1.39328e+06	1715956	2.41452e+06	2.79789e+06	1.60259e+06	2264641	51772.3	742989	4.83249e+06	2.11346e+06	1157912	1.07891e+06	68748.3	1.23004e+06	939875	1.00534e+06	1280358	747731	2.35938e+06	1.78439e+06	1817667	2.01353e+06	1.71419e+06	95212	21075	20248	1.71275e+06	NaN	624343	2.27821e+06	2.54442e+06	66923.3	5.20199e+06	1	109976	2653.96	20630.8
O00232	PSMD12	26S proteasome non-ATPase regulatory subunit 12	PSD12_HUMAN	NaN	NaN	NaN	NaN	NaN	NaN	NaN	NaN	NaN	NaN	NaN	NaN	NaN	NaN	NaN	NaN	NaN	NaN	NaN	NaN	NaN	NaN	NaN	NaN	NaN	NaN	NaN	NaN	NaN	NaN	NaN	NaN	NaN	NaN	NaN	NaN	NaN	NaN	NaN	NaN	NaN	NaN	NaN	NaN	NaN	NaN
O00233	PSMD9	26S proteasome non-ATPase regulatory subunit 9	PSMD9_HUMAN	NaN	NaN	NaN	NaN	NaN	NaN	NaN	NaN	NaN	NaN	NaN	NaN	NaN	NaN	NaN	NaN	NaN	NaN	NaN	NaN	NaN	NaN	NaN	NaN	NaN	NaN	NaN	NaN	NaN	5943.88	NaN	NaN	NaN	NaN	NaN	NaN	NaN	NaN	NaN	NaN	NaN	NaN	NaN	NaN	NaN	NaN
O00241	SIRPB1	Signal-regulatory protein beta-1	SIRB1_HUMAN	11119.6	NaN	4531.92	1674.37	9038.68	NaN	4236.2	43610.6	NaN	25473.7	23061.8	2086.39	NaN	107603	NaN	NaN	5865.55	NaN	14596.6	NaN	NaN	18832.4	28773.7	7340.58	9829.67	NaN	6991.86	NaN	8259.33	15651.9	11908.8	18797.6	4721.54	NaN	32471.2	52267	53374	15151.9	29603.6	13229.7	25916.4	17977.1	13864.4	97479	44464.7	24842
O00299	CLIC1	Chloride intracellular channel protein 1	CLIC1_HUMAN	73889.6	128667	48993.6	214687	171092	443182	37174.2	109116	12348.4	47418.4	5551.85	26582.5	34212.4	86248.2	22844.8	7473.31	21638.9	495405	76879.3	12641.1	75489.2	45201.6	9953.66	46450.3	41757	74269.5	20363.3	21718.7	14101	36033.8	76552.5	32014.8	100295	1.23584	186488	46194	48418.7	90236	86582.8	74444.9	181400	106304	32894.4	179868	290066	108951
O00329	PIK3CD	Phosphatidylinositol 4,5-bisphosphate 3-kinase catalytic subunit delta isoform	PK3CD_HUMAN	32168.1	48180.7	59424	51297.7	318176	42393.4	43551.5	45090.1	NaN	32539.1	42460.1	34547.9	23655.9	30149.1	37575	49286.2	86478.2	275531	33341.1	32038.7	19703.2	52117.1	21639.2	38331	35786.8	25592.9	42041.9	53638.5	62278.1	85068.8	41727.3	45145.9	34548.1	62092	45324.8	69078.7	62141.6	20641.1	43511.2	40687.3	54355.3	88618.5	68929.6	55077.7	89851.1	63076.4
O00391	QSOX1	Sulfhydryl oxidase 1	QSOX1_HUMAN	1.16049e+06	1.36575e+06	1.12093e+06	997490	1.62132e+06	881508	1.12113e+06	787513	873934	970906	1.87391e+06	1235640	1.49458e+06	1.23717e+06	1.12776e+06	890041	1.1109e+06	1.46987e+06	926121	1146094	1.16397e+06	955898	1.07571e+06	916399	1.70976e+06	1.40019e+06	1.31807e+06	557062	964847	1.22614e+06	1.04782e+06	797368	633922	887295	822775	684513	813035	966434	1.21871e+06	671154	1103210	432079	1.22464e+06	1131566	732401	1106878
O00410	IPO5	Importin-5	IPO5_HUMAN	NaN	NaN	NaN	NaN	43500	36824.9	8018.16	NaN	35988.3	174.62	NaN	NaN	NaN	7245.15	NaN	1	NaN	910826	11749.3	NaN	8138.74	NaN	NaN	NaN	NaN	NaN	NaN	NaN	NaN	93537.6	25599.9	NaN	NaN	266852	NaN	NaN	205595	NaN	NaN	1	NaN	NaN	NaN	6422.79	92883.4	NaN
O00429	DNM1L	Dynamin-1-like protein	DNM1L_HUMAN	NaN	NaN	NaN	NaN	NaN	17248.8	NaN	NaN	NaN	NaN	NaN	NaN	NaN	NaN	NaN	40951.6	NaN	NaN	NaN	NaN	NaN	NaN	NaN	NaN	NaN	NaN	NaN	NaN	NaN	NaN	NaN	NaN	NaN	NaN	NaN	NaN	NaN	NaN	NaN	NaN	NaN	NaN	2520.15	2662.25	NaN	NaN
O00451	GFRA2	GDNF family receptor alpha-2	GFRA2_HUMAN	38700.8	14032.4	6230.39	1.30708	NaN	1.24128	NaN	NaN	NaN	16732.3	7292.3	20214.9	NaN	35180.6	NaN	5981.1	4.31492	NaN	12595	17704.1	10656.5	16104.3	11197	1	21994	NaN	10043.8	NaN	1756.06	NaN	17115.1	NaN	7118.87	8980.4	1.2163	26760.1	1.07838	1	NaN	3999.47	NaN	NaN	1	7763.74	NaN	3126.08
O00461	GOLIM4	Golgi integral membrane protein 4	GOLI4_HUMAN	20497.3	12639.5	31683.7	1.30708	365611	NaN	945.181	329862	NaN	40380.5	NaN	39787.6	1.05134	1.4883	NaN	63636	NaN	NaN	11761.5	4992.47	8161.15	19386.5	32617.1	8350.44	NaN	1.49743	NaN	NaN	78187.4	NaN	NaN	63665.2	47955.8	4421.08	93828.7	18856	55311.1	NaN	NaN	9107.72	1.14119	25886	1352.9	19369.6	NaN	7683.77
O00462	MANBA	Beta-mannosidase	MANBA_HUMAN	150575	119998	104628	148150	86010.2	142123	150444	132982	12442.9	120199	99574.8	115662	118024	163515	74353.4	132320	47231.5	140998	123350	100303	75447	125708	127411	159687	170966	132521	141406	127743	121378	184542	102552	143250	179092	108974	114105	123057	140368	92928.6	149902	169678	11886.6	175352	126950	113005	78969	164423
O00468	AGRN	Agrin	AGRIN_HUMAN	6303.76	19502.5	38839.8	1.30709	NaN	48473	14988	1.21511	164834	26954.3	24318.1	1409.23	5032.78	16139.9	32795.5	19849.4	8506.31	1.03068	11274.7	38867	33533.4	6441.08	14490.4	3080	67472.8	NaN	13070.3	16029.2	1.27138	7600.08	884.298	3641.98	55273.6	NaN	11724.1	26786.5	19928.2	28133	31060.4	22748	3838.86	7444.01	45249.1	21666.1	17584.5	43934.3
O00522	KRIT1	Krev interaction trapped protein 1	KRIT1_HUMAN	NaN	NaN	NaN	NaN	NaN	NaN	NaN	NaN	NaN	NaN	NaN	8174.31	NaN	NaN	NaN	1	NaN	NaN	NaN	NaN	NaN	NaN	NaN	NaN	NaN	NaN	NaN	NaN	NaN	NaN	NaN	NaN	NaN	NaN	NaN	NaN	NaN	NaN	NaN	NaN	NaN	NaN	NaN	NaN	NaN	9020.29
O00533	CHL1	Neural cell adhesion molecule L1-like protein	NCHL1_HUMAN	949728	826330	584415	849619	930221	782658	507912	748172	540369	756329	626764	1.07996e+06	596693	1.0125e+06	1.21086e+06	759915	1.8787e+06	525309	740538	628610	581280	758182	567124	1.15278e+06	1.30582e+06	992011	852492	1.03095e+06	821650	618381	1.12195e+06	898331	617570	1.13671e+06	929095	639027	889796	852946	1.04207e+06	578299	1.13696e+06	1.21858e+06	503869	736860	815543	1.00045e+06
O00548	DLL1	Delta-like protein 1	DLL1_HUMAN	NaN	NaN	NaN	NaN	NaN	NaN	NaN	NaN	NaN	NaN	NaN	NaN	NaN	NaN	NaN	NaN	NaN	NaN	NaN	7979.29	NaN	1	NaN	NaN	NaN	NaN	NaN	NaN	NaN	NaN	NaN	NaN	7280.39	28139.8	NaN	NaN	1.07838	NaN	NaN	1	NaN	NaN	NaN	NaN	NaN	NaN
O00560	SDCBP	Syntenin-1	SDCB1_HUMAN	102536	NaN	NaN	86798.3	NaN	NaN	45657.6	NaN	132126	11987.8	1	NaN	NaN	NaN	NaN	58068	40370.1	NaN	21378.2	NaN	NaN	NaN	25891	238032	NaN	NaN	37319.6	NaN	NaN	160899	201451	NaN	NaN	NaN	NaN	NaN	NaN	10662.5	NaN	13785	NaN	NaN	NaN	114861	NaN	NaN
O00562	PITPNM1	Membrane-associated phosphatidylinositol transfer protein 1	PITM1_HUMAN	15607.1	NaN	NaN	NaN	NaN	NaN	1192.67	NaN	NaN	NaN	NaN	NaN	NaN	22536.7	NaN	NaN	NaN	NaN	NaN	NaN	NaN	NaN	NaN	NaN	NaN	2958.49	NaN	NaN	NaN	NaN	NaN	5383.49	NaN	NaN	NaN	NaN	NaN	NaN	NaN	NaN	NaN	17749.9	NaN	NaN	NaN	NaN
O00584	RNASET2	Ribonuclease T2	RNT2_HUMAN	123688	83692.6	69680.2	51329	28382.3	57736.8	70408.6	97731.8	47624.4	70868.8	97425.9	86402.9	47089.6	110936	63020.3	56760.7	73755.2	60835.7	75296	56526.2	53119.3	85108	63187.7	51704.7	55996.3	119305	131881	70143.8	72266.3	25679	65264.1	60586.8	102129	90806.6	69239.8	74762.2	99598	74529.2	94610.6	67273.4	91684.4	108647	98140.8	197188	84745.2	90641.8
O00592	PODXL	Podocalyxin	PODXL_HUMAN	659617	483003	304425	401336	300113	351046	194615	431399	395822	361755	426243	719072	408837	625943	763943	285760	818827	578280	527719	546863	285612	430860	437263	290330	619126	784560	1.1256e+06	763376	892307	408734	534039	538510	414802	708717	588386	546999	391245	417430	617652	295326	652557	647516	367469	621547	674844	471315
O00602	FCN1	Ficolin-1	FCN1_HUMAN	1.90961e+06	1.15898e+06	1171892	2.81859e+06	134051	1.51579e+06	1.30007e+06	1.94814e+06	504488	1.69628e+06	1.93309e+06	2853908	1.65391e+06	2359481	8.08854e+06	2.11457e+06	14040888	1.46298e+06	1.72949e+06	1.62719e+06	1.02375e+06	1.72322e+06	2224567	1.24809e+06	1.38311e+06	4.25075e+06	1.64063e+06	1.2109e+06	1971938	1.1176e+06	1.21596e+06	1.73999e+06	1.48471e+06	1.61958e+06	1.71636e+06	2.12909e+06	1.35307e+06	2.03138e+06	1.74954e+06	951251	1.56285e+06	1.48976e+06	1390202	1.93981e+06	1.05774e+06	1.8599e+06
O00744	WNT10B	Protein Wnt-10b	WN10B_HUMAN	NaN	NaN	65376.1	NaN	NaN	337537	NaN	365159	105309	NaN	NaN	27083.4	343379	NaN	NaN	NaN	NaN	NaN	289210	NaN	NaN	313657	64064.7	233488	272561	619715	398767	NaN	335054	NaN	NaN	98660.4	21119.2	NaN	280939	105122	325158	NaN	NaN	309979	52659.8	NaN	106717	116354	271515	NaN
O00748	CES2	Cocaine esterase	EST2_HUMAN	NaN	123075	NaN	1.30707	NaN	25183.9	NaN	3031.46	235173	508428	7898.33	86630.3	1.05134	NaN	95661.7	25320.4	127833	NaN	12445.5	5321.66	16587.7	45589.2	NaN	29476.5	34081.6	NaN	30564.8	12836.7	NaN	680586	NaN	25679.1	20435.7	51244.3	NaN	27953.6	NaN	230149	NaN	46826.3	NaN	91278.2	NaN	16567.8	68166.4	32713
O00754	MAN2B1	Lysosomal alpha-mannosidase	MA2B1_HUMAN	4538.56	1.81311	2066.4	13264	1.23112	64828	2185.21	767.778	2.70598	6818.11	4583.38	4888.28	1.05133	4697.6	NaN	8768.42	NaN	1.03068	7404.35	9565.7	7552.25	6269.25	13565.8	1812.87	8869.81	12530.4	8570.78	9806.76	18212.1	10776.5	6838.76	9309	23234.4	4718.78	8128.38	21352.7	1321.19	1	7104.97	25708.2	3238.09	12085	1	1.03556	5609.23	2346.62
O00757	FBP2	Fructose-1,6-bisphosphatase isozyme 2	F16P2_HUMAN	NaN	65714.5	35262.6	68262	NaN	NaN	NaN	NaN	NaN	145422	67172.9	93000.1	NaN	NaN	292347	NaN	NaN	NaN	NaN	NaN	276472	NaN	NaN	41615.3	NaN	118435	NaN	NaN	NaN	NaN	135296	NaN	NaN	NaN	NaN	NaN	NaN	NaN	NaN	119773	NaN	NaN	NaN	NaN	NaN	137423
O00763	ACACB	Acetyl-CoA carboxylase 2	ACACB_HUMAN	2541546	207439	288468	471142	880582	NaN	425181	911294	307582	754920	661175	1.09105e+06	3.46892e+06	3.51332e+06	204015	1.22193e+06	1.25163e+06	491642	680683	619687	37103.4	405376	283311	1.16495e+06	610004	2.9605e+06	612666	1.61194e+06	1.02061e+06	1.35031e+06	251039	1.31667e+06	1.1169e+06	516677	195370	397077	1.75406e+06	645343	2.99495e+06	167490	933154	196745	141574	1.32822e+06	701224	602383
O14494	PLPP1	Phospholipid phosphatase 1	PLPP1_HUMAN	NaN	NaN	NaN	NaN	NaN	NaN	NaN	NaN	NaN	NaN	NaN	NaN	NaN	NaN	NaN	NaN	NaN	NaN	NaN	NaN	NaN	NaN	NaN	NaN	NaN	NaN	NaN	NaN	NaN	NaN	NaN	NaN	NaN	NaN	NaN	NaN	NaN	NaN	NaN	NaN	NaN	NaN	NaN	NaN	NaN	NaN
O14498	ISLR	Immunoglobulin superfamily containing leucine-rich repeat protein	ISLR_HUMAN	363214	333790	293630	196278	469649	376731	323956	356310	348161	379572	386570	556006	284508	340745	255929	327932	423570	362757	333464	362553	380440	402280	443351	271904	361233	361581	385264	282110	210046	225269	287286	314044	301304	384743	322429	267699	401264	283639	351052	418672	242798	274259	386231	319724	533244	406711
O14522	PTPRT	Receptor-type tyrosine-protein phosphatase T	PTPRT_HUMAN	NaN	NaN	NaN	331831	NaN	136899	233536	173538	NaN	359293	337110	NaN	NaN	833185	NaN	350164	NaN	NaN	NaN	NaN	99183.9	NaN	293562	174576	205370	NaN	NaN	NaN	NaN	NaN	214971	231815	293744	166593	240763	273570	202510	203816	NaN	184624	191911	241275	191369	NaN	NaN	NaN
O14545	TRAFD1	TRAF-type zinc finger domain-containing protein 1	TRAD1_HUMAN	NaN	10613.9	NaN	NaN	NaN	NaN	NaN	NaN	NaN	90693	1	54649.6	NaN	NaN	NaN	NaN	NaN	NaN	NaN	57316	NaN	NaN	69254.4	NaN	NaN	NaN	NaN	NaN	11729.8	NaN	NaN	NaN	NaN	NaN	NaN	NaN	NaN	NaN	NaN	72968.8	NaN	123156	NaN	NaN	NaN	NaN
O14579	COPE	Coatomer subunit epsilon	COPE_HUMAN	NaN	NaN	NaN	NaN	NaN	NaN	NaN	NaN	NaN	NaN	NaN	NaN	NaN	NaN	NaN	NaN	NaN	NaN	NaN	NaN	6443.4	NaN	NaN	NaN	NaN	NaN	NaN	NaN	NaN	NaN	NaN	NaN	NaN	NaN	NaN	NaN	NaN	703.957	NaN	NaN	NaN	NaN	NaN	1.03556	NaN	NaN
O14607;O15550	UTY;KDM6A	Histone demethylase UTY;Lysine-specific demethylase 6A	UTY_HUMAN;KDM6A_HUMAN	1.27945e+06	907699	918998	1.16035e+06	576533	223314	908272	2263714	745567	1.93271e+06	791159	1684468	687771	1.43035e+06	901447	1.12409e+06	1.63143e+06	1.05266e+06	1.03782e+06	1.72712e+06	2.45877e+06	1.00303e+06	888808	1.34476e+06	729172	1.41352e+06	3.14097e+06	1.27275e+06	482458	579301	1108951	541769	1.96433e+06	877326	818401	1.21619e+06	735944	1.29538e+06	1.21461e+06	1.00011e+06	976615	1.72034e+06	1229096	1.0916e+06	1.04211e+06	1.42658e+06
O14618	CCS	Copper chaperone for superoxide dismutase	CCS_HUMAN	12359.2	NaN	9105.83	NaN	NaN	NaN	34653.1	89578.5	NaN	NaN	82019	11096.9	14010.1	NaN	NaN	170989	NaN	NaN	NaN	NaN	NaN	NaN	NaN	NaN	14998.9	NaN	NaN	7469.38	NaN	NaN	49900	8616.31	NaN	NaN	NaN	NaN	70276.1	26163.4	NaN	8668.96	NaN	NaN	NaN	28479.5	NaN	11599.3
O14638	ENPP3	Ectonucleotide pyrophosphatase/phosphodiesterase family member 3	ENPP3_HUMAN	NaN	NaN	741.342	NaN	NaN	NaN	NaN	NaN	NaN	NaN	NaN	NaN	NaN	NaN	NaN	NaN	NaN	NaN	NaN	NaN	NaN	1	NaN	NaN	NaN	NaN	1.14763	NaN	NaN	NaN	NaN	NaN	NaN	2637.15	NaN	NaN	NaN	NaN	NaN	3151.48	1.14119	3607.19	NaN	1.03557	NaN	NaN
O14639	ABLIM1	Actin-binding LIM protein 1	ABLM1_HUMAN	12174	133082	11972.5	31911.4	14560.6	27898.3	29426.2	3534.34	38667.2	9855.64	13465.7	NaN	39857.9	NaN	NaN	5955.15	NaN	1.03068	31712.5	19132.6	NaN	40822.5	15168.8	19087.4	15939.6	NaN	6084	70376.7	NaN	NaN	16738.7	4895.12	6877.8	70280.2	3823.05	6683.31	16231.3	5521.35	NaN	1	NaN	64721.9	6955.62	37441.9	11467.6	NaN
O14672	ADAM10	Disintegrin and metalloproteinase domain-containing protein 10	ADA10_HUMAN	NaN	1.81311	1	NaN	NaN	25526.9	NaN	1.21511	NaN	1	NaN	NaN	NaN	1.48831	NaN	1	NaN	NaN	1	1	NaN	1	1.04106	1	1.27012	NaN	NaN	12059.6	1.27138	NaN	1.03778	NaN	17558.9	1.23584	NaN	1.0817	NaN	1	NaN	4878.26	12982.2	4096.81	NaN	5611.62	1.65535	4265.72
O14732	IMPA2	Inositol monophosphatase 2	IMPA2_HUMAN	NaN	NaN	NaN	NaN	NaN	NaN	NaN	1.21511	NaN	NaN	NaN	NaN	NaN	NaN	NaN	NaN	NaN	NaN	NaN	NaN	NaN	NaN	NaN	NaN	NaN	NaN	NaN	NaN	NaN	NaN	NaN	NaN	NaN	NaN	NaN	NaN	NaN	60753	NaN	NaN	NaN	NaN	NaN	NaN	NaN	NaN
O14733	MAP2K7	Dual specificity mitogen-activated protein kinase kinase 7	MP2K7_HUMAN	10376.9	107455	63010.3	61856.3	69854.1	14256.9	13072.9	41429.1	126132	7615.93	22450.4	135565	NaN	NaN	NaN	NaN	134770	1.03068	NaN	43865.6	36026.3	30690.4	5302.14	1	NaN	NaN	NaN	37245.5	NaN	NaN	50108.2	48388.1	33902.2	90237	64764.7	9532.08	9365.97	50783.8	24593.4	103585	95993	133469	135507	37441.6	78246.5	63930.8
O14744	PRMT5	Protein arginine N-methyltransferase 5	ANM5_HUMAN	NaN	NaN	NaN	NaN	NaN	NaN	NaN	NaN	NaN	NaN	NaN	1.04698	NaN	NaN	NaN	NaN	NaN	NaN	NaN	NaN	NaN	NaN	NaN	NaN	NaN	NaN	NaN	NaN	NaN	NaN	NaN	NaN	NaN	NaN	NaN	NaN	NaN	8591.95	NaN	NaN	NaN	2156.24	NaN	1.03557	NaN	NaN
O14745	SLC9A3R1	Na(+)/H(+) exchange regulatory cofactor NHE-RF1	NHRF1_HUMAN	NaN	NaN	NaN	NaN	NaN	NaN	NaN	NaN	NaN	2114.13	NaN	NaN	NaN	1.4883	NaN	NaN	NaN	NaN	NaN	NaN	NaN	NaN	NaN	NaN	NaN	NaN	NaN	NaN	NaN	NaN	NaN	NaN	NaN	NaN	NaN	NaN	NaN	NaN	NaN	NaN	NaN	NaN	NaN	11235.1	NaN	NaN
O14746	TERT	Telomerase reverse transcriptase	TERT_HUMAN	1468874	2.71838e+06	1460371	1.34627e+06	2324785	2.05248e+06	1.5688e+06	610543	797962	779684	924244	1.56788e+06	1.64929e+06	1.57391e+06	2.31267e+06	878324	3.04585e+06	1.61645e+06	847978	1766709	1.09739e+06	1879556	1231819	1.60907e+06	2.39869e+06	3323285	1.20941e+06	1.50511e+06	2748892	2965981	1.00517e+06	1210236	1.10264e+06	1.98369e+06	2.45036e+06	2078160	1.76621e+06	1.76998e+06	1.44903e+06	1.80534e+06	2.13006e+06	1628759	787829	1.13125e+06	2.31261e+06	2.29887e+06
O14753	OVOL1	Putative transcription factor Ovo-like 1	OVOL1_HUMAN	NaN	100597	NaN	101853	NaN	168636	NaN	63177.5	NaN	119654	81779.5	NaN	NaN	NaN	321171	NaN	367758	NaN	110324	NaN	NaN	NaN	NaN	NaN	NaN	NaN	NaN	35286.4	NaN	NaN	NaN	30163.3	63274.1	NaN	NaN	31916.1	30274.6	NaN	NaN	56415.6	73471.4	NaN	NaN	37641.4	172626	120718
O14773	TPP1	Tripeptidyl-peptidase 1	TPP1_HUMAN	NaN	NaN	NaN	6355.32	3397.56	2978.21	NaN	5523.62	NaN	3433.01	NaN	6326.73	NaN	NaN	NaN	NaN	19403.6	NaN	NaN	NaN	5351.84	NaN	NaN	NaN	NaN	NaN	NaN	NaN	NaN	NaN	NaN	NaN	1.08333	1.23583	NaN	2933.95	NaN	20979.7	NaN	2966.61	1.14119	1.61184	NaN	2885.49	1219.68	14.3913
O14786	NRP1	Neuropilin-1	NRP1_HUMAN	523030	546067	349548	316471	373156	233241	336079	271092	351439	389094	344301	588411	323765	591276	261456	426324	552087	349911	370848	529298	343911	431950	339379	262616	395632	633724	441608	371658	432322	261473	387054	337697	384752	417048	553884	384693	276948	349460	491587	519963	198877	407338	436935	536232	413589	367156
O14791	APOL1	Apolipoprotein L1	APOL1_HUMAN	3559390	3.23905e+06	4.3178e+06	3.79582e+06	5.14181e+06	1.61149e+06	6.00641e+06	2642415	4375399	3.08129e+06	3518110	3.6859e+06	3.28342e+06	4.9846e+06	747505	4403405	1.20462e+06	8829705	2836160	3.76607e+06	1.44354e+06	2.74482e+06	3934646	4.11227e+06	3.42297e+06	4374860	1.91225e+06	1.90544e+06	5.93036e+06	3985627	3.93946e+06	4.26857e+06	4.69422e+06	1.91292e+06	3.99596e+06	4370934	4.05357e+06	2.63309e+06	3.7655e+06	3.1007e+06	1.56824e+06	1.86297e+06	5.22435e+06	2.81766e+06	2590509	5134524
O14793	MSTN	Growth/differentiation factor 8	GDF8_HUMAN	NaN	NaN	2411.33	5648.73	NaN	1.24127	14648	NaN	NaN	9530.7	8354.94	2922.94	13249	NaN	11591.7	3418	NaN	NaN	4940.98	9910.75	NaN	2835.1	2439.98	5277.95	17148.8	1.49743	8580.16	7861.71	NaN	15098.8	14730.6	15751.4	NaN	8829.02	NaN	1.08169	NaN	4424.1	13317.3	NaN	NaN	NaN	3128.59	3488.8	24562.2	8904.92
O14798	TNFRSF10C	Tumor necrosis factor receptor superfamily member 10C	TR10C_HUMAN	NaN	NaN	NaN	NaN	NaN	NaN	NaN	1.2151	2775.83	3068.12	NaN	1768.9	NaN	NaN	NaN	NaN	NaN	NaN	NaN	NaN	NaN	943.451	8248.55	NaN	NaN	817.53	NaN	NaN	NaN	NaN	1610.32	NaN	NaN	NaN	NaN	7120.27	2784.73	NaN	606.899	NaN	NaN	NaN	2059.45	9475.88	NaN	NaN
O14818	PSMA7	Proteasome subunit alpha type-7	PSA7_HUMAN	313578	119772	86774.3	153762	47769.3	132525	1091542	222791	77176.9	169695	119043	158412	4.95217e+06	369175	5513281	181320	346331	84029.5	652435	345666	1.81051e+06	519691	229056	1.03419e+06	82529	287114	4175381	44892	1.22133e+06	11051.2	2.3759e+06	1722826	231166	105860	48926.7	108755	185063	317176	256155	269373	61839.7	325577	649627	296672	113215	91116.7
O14893	GEMIN2	Gem-associated protein 2	GEMI2_HUMAN	4220062	3.03083e+06	4480905	4.23371e+06	714918	3365549	2.87059e+06	3294650	2.88444e+06	2.4657e+06	5.84653e+06	3883692	6222847	3.74453e+06	3944857	2.88436e+06	4.24611e+06	881644	2.6659e+06	6.85683e+06	3596654	1.94944e+06	2.62834e+06	2380400	2.37888e+06	4812188	3937613	3.06895e+06	4.21117e+06	2.71968e+06	2.35371e+06	3.30347e+06	2631189	3.18706e+06	2686527	3.03836e+06	3.13017e+06	2461250	3.73021e+06	1.33843e+06	2.59984e+06	3377195	1.97452e+06	3.40207e+06	2.66822e+06	1.8138e+06
O14908	GIPC1	PDZ domain-containing protein GIPC1	GIPC1_HUMAN	1.68444e+06	2.67667e+06	1.52732e+06	2244705	NaN	882140	1.4256e+06	1.98433e+06	1.24438e+06	912612	1.74552e+06	1.39932e+06	1364637	1.90285e+06	2528346	1.5236e+06	2.54815e+06	NaN	805095	1.72361e+06	1.07798e+06	830176	1.57023e+06	1.66415e+06	1.31764e+06	2.07296e+06	2.17269e+06	1.54876e+06	2.19491e+06	1.40623e+06	973650	1.06716e+06	1.86075e+06	1.98038e+06	1.05568e+06	1.91029e+06	950656	1.0253e+06	2.84492e+06	1.09714e+06	844423	2.70234e+06	1.09276e+06	827836	1.08464e+06	1.87469e+06
O14917	PCDH17	Protocadherin-17	PCD17_HUMAN	31938.8	NaN	2366.46	NaN	1.23112	NaN	NaN	NaN	NaN	21367.9	13311	NaN	NaN	NaN	NaN	10578.4	NaN	NaN	5399.79	NaN	NaN	8960.26	7959.38	NaN	NaN	NaN	NaN	NaN	NaN	2676.49	NaN	NaN	NaN	NaN	2876.68	795.881	NaN	NaN	18525.8	NaN	NaN	NaN	NaN	11514.3	24240.5	NaN
O14920	IKBKB	Inhibitor of nuclear factor kappa-B kinase subunit beta	IKKB_HUMAN	420197	887692	324504	461263	1.23112	533805	330206	211844	NaN	167536	246297	501162	126850	551293	NaN	116668	756896	1.03068	112366	197706	440543	229683	275789	334761	312899	520857	127730	NaN	61085.9	129886	149490	61765.1	195972	199830	122415	267742	187159	123788	638555	535239	94084	334880	NaN	39570.2	223246	46811.6
O14929	HAT1	Histone acetyltransferase type B catalytic subunit	HAT1_HUMAN	NaN	1.81311	NaN	NaN	NaN	NaN	NaN	1.21511	NaN	NaN	NaN	NaN	NaN	NaN	NaN	NaN	NaN	NaN	NaN	NaN	NaN	NaN	NaN	NaN	NaN	NaN	NaN	NaN	NaN	NaN	NaN	NaN	NaN	NaN	NaN	NaN	1.07838	1	NaN	NaN	NaN	NaN	NaN	NaN	NaN	NaN
O14960	LECT2	Leukocyte cell-derived chemotaxin-2	LECT2_HUMAN	1.39363	19334.1	NaN	NaN	NaN	NaN	5628.01	NaN	NaN	NaN	1	1.04698	14487.6	NaN	6797.63	NaN	51679.3	NaN	4570.41	NaN	7039.4	NaN	NaN	NaN	NaN	NaN	1.14763	5085.06	NaN	NaN	NaN	NaN	NaN	NaN	1.21629	1.0817	NaN	NaN	NaN	NaN	NaN	NaN	NaN	NaN	NaN	NaN
O14964	HGS	Hepatocyte growth factor-regulated tyrosine kinase substrate	HGS_HUMAN	NaN	NaN	NaN	NaN	NaN	NaN	NaN	NaN	NaN	NaN	NaN	NaN	NaN	NaN	NaN	NaN	NaN	NaN	NaN	NaN	NaN	NaN	NaN	NaN	NaN	NaN	NaN	NaN	NaN	NaN	NaN	NaN	NaN	NaN	NaN	NaN	NaN	NaN	NaN	NaN	NaN	NaN	NaN	NaN	NaN	NaN
O14967	CLGN	Calmegin	CLGN_HUMAN	84495.2	15498.7	27005.2	56938.8	55471.4	17321	12117.4	63683.6	NaN	15721.8	65217.7	NaN	1.05133	30041.8	15464.3	27979.8	21752.5	53294.9	11634.3	1	11817	26131.8	36175	41469.1	10588.7	35427.8	12263.4	38895.8	60846.5	39387.3	39095.7	37214.4	32958	49721.2	53843.4	39196	85760	78975.9	93079.2	10112.8	75581.4	43130.5	12502.5	69638.8	22859	67965.9
O14975	SLC27A2	Long-chain fatty acid transport protein 2	S27A2_HUMAN	448839	NaN	NaN	NaN	25318.6	NaN	NaN	NaN	NaN	45097.5	83232.7	NaN	222917	NaN	NaN	46809.2	NaN	NaN	63800.2	39177.4	NaN	33486.1	NaN	NaN	24825.1	690298	61061.7	NaN	56400.2	15482.6	40417.7	56595.9	NaN	43664.7	56070.2	NaN	NaN	46963.4	523024	NaN	63507.1	NaN	NaN	74805.7	50764.2	42800
O14980	XPO1	Exportin-1	XPO1_HUMAN	75059.3	NaN	1864.33	NaN	NaN	26339.5	1064	9869.94	NaN	810.244	36189.9	432637	NaN	1.4883	2307.37	NaN	NaN	NaN	3045.01	1	1587.66	9536.19	1.04107	15902.3	NaN	10094.5	NaN	3617.86	4106.97	21764.4	1.03778	1.13403	8701.45	NaN	1.21631	4393.14	2679.9	10663.5	10919.3	3301.05	37382.8	41510.2	998.263	10767.8	11035.5	220222
O14983	ATP2A1	Sarcoplasmic/endoplasmic reticulum calcium ATPase 1	AT2A1_HUMAN	NaN	NaN	NaN	NaN	NaN	NaN	NaN	NaN	17696.6	NaN	88397.8	NaN	39638.2	NaN	NaN	NaN	220366	NaN	NaN	NaN	NaN	56020.4	87508.2	41438.2	NaN	319146	115602	NaN	NaN	45357	64071.9	70112.4	NaN	112393	NaN	NaN	NaN	62842.4	232475	21969.2	NaN	246704	NaN	81915.2	70833.9	58930.4
O15013	ARHGEF10	Rho guanine nucleotide exchange factor 10	ARHGA_HUMAN	NaN	NaN	NaN	NaN	NaN	NaN	NaN	NaN	NaN	NaN	NaN	10496.4	NaN	NaN	NaN	20829.8	NaN	NaN	NaN	NaN	NaN	NaN	1736.48	NaN	NaN	NaN	NaN	NaN	NaN	NaN	6864.28	NaN	NaN	NaN	NaN	NaN	NaN	NaN	NaN	NaN	NaN	NaN	6094.26	NaN	NaN	NaN
O15015	ZNF646	Zinc finger protein 646	ZN646_HUMAN	NaN	45476.5	43007.9	NaN	NaN	NaN	NaN	NaN	163417	NaN	NaN	NaN	31320.1	NaN	NaN	43566.8	NaN	NaN	NaN	NaN	NaN	NaN	NaN	NaN	NaN	116793	42990.7	NaN	139594	98386.8	NaN	65966.4	100474	NaN	NaN	NaN	101848	164091	NaN	NaN	113426	158827	76110.4	165549	65328	82523.6
O15016	TRIM66	Tripartite motif-containing protein 66	TRI66_HUMAN	NaN	NaN	NaN	1425.72	NaN	NaN	NaN	NaN	NaN	NaN	1	2481.9	1.05133	NaN	NaN	NaN	NaN	NaN	1712.15	NaN	1937.68	NaN	NaN	NaN	NaN	NaN	NaN	NaN	NaN	NaN	1.03778	1.13403	1.08332	NaN	NaN	NaN	1.07838	23950.5	NaN	NaN	1.14119	NaN	1	NaN	NaN	1.31998
O15027	SEC16A	Protein transport protein Sec16A	SC16A_HUMAN	NaN	NaN	NaN	NaN	398978	NaN	NaN	37100.4	NaN	32146.9	NaN	NaN	NaN	NaN	NaN	504254	NaN	NaN	14520.2	NaN	NaN	NaN	NaN	24645.3	NaN	NaN	NaN	NaN	58690	NaN	NaN	112454	NaN	37472.5	61652.3	108882	NaN	NaN	NaN	19498.2	NaN	NaN	NaN	117145	NaN	NaN
O15031	PLXNB2	Plexin-B2	PLXB2_HUMAN	30384	12567.3	11946	34040.9	29976	32514.1	144372	35730.8	18146	12496.7	14913.9	46585.2	19537	61136.7	50232.2	90157.8	122844	18000	52773.4	48861.2	40204.5	187276	52702.2	10962.2	15024.1	60856.4	23230.1	88072.4	5715.82	172707	13162.7	9928.33	10074.1	17870.2	8588.91	6865.78	47318.9	39582.4	7784.35	198914	18689.6	7168.86	194584	115205	38850.5	21912.9
O15034	RIMBP2	RIMS-binding protein 2	RIMB2_HUMAN	NaN	NaN	NaN	NaN	NaN	NaN	NaN	NaN	NaN	NaN	NaN	NaN	NaN	NaN	NaN	NaN	NaN	NaN	NaN	NaN	NaN	NaN	NaN	NaN	NaN	NaN	NaN	NaN	NaN	NaN	NaN	NaN	NaN	NaN	NaN	NaN	NaN	NaN	NaN	NaN	NaN	NaN	NaN	NaN	NaN	NaN
O15067	PFAS	Phosphoribosylformylglycinamidine synthase	PUR4_HUMAN	NaN	NaN	NaN	NaN	NaN	NaN	NaN	NaN	NaN	NaN	NaN	NaN	NaN	NaN	NaN	NaN	NaN	NaN	NaN	NaN	NaN	NaN	NaN	NaN	NaN	NaN	NaN	NaN	1.27138	1	NaN	1.13403	NaN	NaN	NaN	NaN	10421.3	NaN	NaN	NaN	NaN	NaN	NaN	NaN	NaN	NaN
O15068	MCF2L	Guanine nucleotide exchange factor DBS	MCF2L_HUMAN	95423	107706	66468.7	89958.5	1.23112	63606.2	70113.4	95377.8	114848	58902.1	72863.4	74076.6	69239	154311	129267	101052	99300.8	3483166	76208.1	76599.4	75369	93833.9	80703.5	100128	97689.1	90825.7	129107	99127.1	84897.4	400259	131646	249689	63135.6	90950.1	90634.6	143268	90634.1	74680.2	102615	39215.9	109158	106491	72661.2	59057.2	116957	68994.3
O15090	ZNF536	Zinc finger protein 536	ZN536_HUMAN	NaN	NaN	36972.6	137941	16746.2	134987	51654.5	102875	NaN	357027	364804	209961	NaN	109024	146526	31910.6	NaN	NaN	8525.22	30380.3	46056	57415.1	23546.5	16633.7	48107.9	90299	46101.4	156198	NaN	57578.8	40392.6	68305	59450.2	77644	72841.5	69468.6	37813.3	19873.5	149464	49273	56886.5	151674	45066.1	56558.7	123050	118818
O15091	PRORP	Mitochondrial ribonuclease P catalytic subunit	MRPP3_HUMAN	178124	NaN	128614	NaN	327594	111439	127329	137521	NaN	120408	116972	102813	150524	204593	211669	199822	NaN	435118	141823	115501	114326	145295	127719	207846	178314	202811	180470	195703	189104	331203	NaN	177684	144491	150318	193632	163799	151945	NaN	162937	101159	164278	201525	255093	119983	146218	NaN
O15111	CHUK	Inhibitor of nuclear factor kappa-B kinase subunit alpha	IKKA_HUMAN	NaN	117118	137525	164427	NaN	90036.6	107262	120446	NaN	165577	111177	125950	98452.3	202995	110723	200648	233684	NaN	109683	126645	190330	128830	120690	100838	95972.4	121223	120796	134505	157474	92816.3	163079	158609	252545	189923	202772	258184	155603	106732	196191	NaN	177100	309783	205789	228912	136297	153803
O15131	KPNA5	Importin subunit alpha-6	IMA6_HUMAN	NaN	NaN	NaN	NaN	NaN	NaN	NaN	NaN	NaN	NaN	NaN	28378	NaN	NaN	NaN	NaN	NaN	167103	NaN	NaN	NaN	NaN	NaN	NaN	NaN	NaN	NaN	NaN	NaN	NaN	NaN	NaN	NaN	NaN	NaN	NaN	NaN	NaN	NaN	20327.6	NaN	NaN	21220.3	NaN	NaN	NaN
O15143	ARPC1B	Actin-related protein 2/3 complex subunit 1B	ARC1B_HUMAN	80616.2	NaN	7262.92	30431.1	NaN	45104.6	29259.6	53077.8	NaN	106138	132726	112974	6534.36	8003.55	NaN	NaN	NaN	NaN	4708.83	13537.1	11395.3	8980.4	66527.5	29767.2	5803.91	NaN	NaN	NaN	62368.6	NaN	62516.2	100083	20420.3	170676	72094.3	65703.1	102557	12461.8	31797.7	15046.9	77798.4	163033	NaN	20242.3	41389.3	21044.5
O15144	ARPC2	Actin-related protein 2/3 complex subunit 2	ARPC2_HUMAN	11280.1	46384.7	12249.6	58182.7	2556.4	90663	17105	54011.6	4659.68	41850	NaN	10259.4	12400.9	32901.5	17640.8	NaN	9179.78	22367.8	4377.73	1	38613.9	6122.91	NaN	10787.9	1.27012	28410.6	1.14763	NaN	6528.44	2047.92	NaN	1.13403	98155.1	NaN	57681.8	6187.79	9659.04	108730	36274.1	72421.3	48731.8	5175.01	NaN	109103	67308	55548.9
O15145	ARPC3	Actin-related protein 2/3 complex subunit 3	ARPC3_HUMAN	NaN	NaN	818.161	11835	NaN	9846.79	1	6208.63	NaN	3125.82	1	1.04698	1.05133	NaN	NaN	NaN	NaN	12588.5	4143.44	1	1.19808	1	1.04106	1656.18	1.27012	NaN	1.14763	NaN	1.27138	1	1755.21	NaN	9714.5	1.23584	7823.2	NaN	NaN	23258.8	6545.02	9830.84	6664.85	NaN	678.571	5305.62	12138.2	4086.43
O15151	MDM4	Protein Mdm4	MDM4_HUMAN	2.14156e+06	814078	1481940	2.54012e+06	1.84006e+06	1.13654e+06	1.67618e+06	1.73466e+06	1.21063e+06	1.71999e+06	1.90326e+06	951705	1363593	2.42661e+06	1.73185e+06	2.38499e+06	654878	2.26393e+06	1.85838e+06	2081972	606252	1.93648e+06	2.37185e+06	1673927	1.9936e+06	2.73847e+06	2.19128e+06	1.6557e+06	1.99948e+06	1.54606e+06	2.01093e+06	1.61413e+06	2.25525e+06	2.11576e+06	1.98496e+06	2.47098e+06	1.90681e+06	2.00952e+06	2418235	2.13519e+06	1.56532e+06	2.12194e+06	1.46005e+06	2.49361e+06	1.29077e+06	936759
O15197	EPHB6	Ephrin type-B receptor 6	EPHB6_HUMAN	NaN	NaN	NaN	NaN	NaN	NaN	NaN	3244.14	NaN	NaN	NaN	NaN	NaN	NaN	NaN	NaN	NaN	NaN	1	NaN	NaN	NaN	1.04106	1	NaN	NaN	NaN	NaN	NaN	NaN	NaN	4641.02	NaN	NaN	NaN	NaN	NaN	NaN	NaN	NaN	NaN	NaN	NaN	NaN	NaN	NaN
O15204	ADAMDEC1	ADAM DEC1	ADEC1_HUMAN	6466.6	28273.2	19265.6	1.30708	101440	11175.5	3024.95	15481	16958.1	20978.3	24683.9	17647.8	33079.9	9095.15	27703.2	6962.35	196141	79577.4	5169.55	3199.31	NaN	863.066	6733.33	13583.6	9214.05	24037.4	75202.2	5080.57	4827.82	57528.7	21132.9	1.13404	1.08332	1.23583	10740.8	1.0817	17795.3	6605.8	15139.8	10564.3	19134.6	6396.21	26434.6	22377.3	14070.2	2101.86
O15212	PFDN6	Prefoldin subunit 6	PFD6_HUMAN	NaN	1.81311	2353.26	1.30709	NaN	6906.43	1	2628.3	NaN	NaN	NaN	NaN	NaN	NaN	NaN	NaN	NaN	1.03068	NaN	NaN	7533.06	NaN	NaN	NaN	NaN	NaN	NaN	NaN	3262.26	NaN	2075.73	NaN	972.832	3416.19	1.21629	1.0817	4746.71	3324.9	1103.68	NaN	4331.82	NaN	NaN	1418.23	1.65535	1371.44
O15217	GSTA4	Glutathione S-transferase A4	GSTA4_HUMAN	NaN	3966.81	4350.53	3233.15	NaN	NaN	3196.69	2743.55	16799.1	2973.95	1416.15	1694.56	43684.7	1663.78	NaN	NaN	NaN	NaN	2355.72	2332.34	2289.06	NaN	1093.14	5742.01	4771.02	NaN	NaN	2496.92	NaN	NaN	NaN	516.828	3285.88	1761.04	2708.33	2321.54	6421.84	5303.74	NaN	3224.64	3987.22	2813.11	NaN	NaN	NaN	4171.44
O15226	NKRF	NF-kappa-B-repressing factor	NKRF_HUMAN	NaN	NaN	NaN	NaN	228847	NaN	47909.6	11612.6	NaN	NaN	NaN	NaN	NaN	NaN	NaN	NaN	NaN	NaN	NaN	NaN	NaN	59741.1	37072.5	NaN	NaN	NaN	NaN	NaN	32862.2	68875.1	NaN	NaN	NaN	NaN	NaN	NaN	73674.7	34877.2	NaN	62866.2	NaN	NaN	42193.1	45007.4	NaN	NaN
O15230	LAMA5	Laminin subunit alpha-5	LAMA5_HUMAN	115622	NaN	58964.5	1.30708	NaN	9425.85	21091.2	18983.9	NaN	22113	16455.8	NaN	60917.6	175199	35070.5	20476.7	55942.7	NaN	28518.6	852.796	19564.7	61312.7	1.04106	30893.1	1.27012	113136	NaN	72876.3	117230	32416.3	15372.2	15018.4	29371.1	1.23583	1.21629	NaN	1.07838	19470	93168.4	16664.9	49610.1	NaN	1	50913.9	21285.8	19205.9
O15235	MRPS12	28S ribosomal protein S12, mitochondrial	RT12_HUMAN	226855	NaN	102605	154991	100173	99681.4	NaN	175078	NaN	175888	162009	151478	146482	254534	165863	126691	173258	106771	136864	183944	NaN	124783	143873	133873	138378	255502	121899	202062	187043	149224	124063	165547	163849	122166	122508	141026	188796	149465	208723	88918.1	180132	240116	NaN	249729	131276	143784
O15270;Q9NUV7	SPTLC2;SPTLC3	Serine palmitoyltransferase 2;Serine palmitoyltransferase 3	SPTC2_HUMAN;SPTC3_HUMAN	1.5152e+06	549358	18778578	205255	18351622	244472	5.93093e+06	1.11093e+06	941282	268171	847067	481003	16955656	1.53447e+06	26861682	1.0811e+06	1.42952e+06	17496222	4.35786e+06	2.0771e+06	1.0554e+06	1.88604e+06	1692343	6.06734e+06	122490	1.03145e+06	14543053	6.82981e+06	284187	23447348	12294936	3.36268e+06	516145	416085	392936	293296	240714	398297	1.09365e+06	157916	215021	610693	3521492	228459	297183	445922
O15327	INPP4B	Inositol polyphosphate 4-phosphatase type II	INP4B_HUMAN	962881	1864887	NaN	NaN	1.23112	731516	NaN	796781	NaN	NaN	NaN	393278	1.30309e+06	1.62002e+06	NaN	NaN	NaN	NaN	966362	NaN	NaN	NaN	1.24715e+06	2.56139e+06	1.21101e+06	1.60203e+06	NaN	1.4672e+06	1.50757e+06	1	NaN	NaN	NaN	NaN	865260	NaN	1.06125e+06	NaN	NaN	NaN	1.44496e+06	967705	NaN	NaN	1.12845e+06	NaN
O15335	CHAD	Chondroadherin	CHAD_HUMAN	NaN	83569.4	44705.1	37856.4	NaN	43876.9	24398.1	57513	153994	42335.7	52133.8	72261.6	28760.8	29376.6	67860	42720.6	214726	NaN	42951.9	62834.3	NaN	23535.2	44170.2	34299	34456.5	38933.6	38713.1	93499.7	NaN	NaN	34521.4	60819.3	51075	53113.5	15998.7	41262.9	64051.8	44272.6	69801.3	NaN	53394.3	78811.1	44528.2	84127.3	43458.7	50956.9
O15355	PPM1G	Protein phosphatase 1G	PPM1G_HUMAN	403645	971369	540573	NaN	NaN	462512	452088	687106	604274	616770	692266	NaN	866790	413979	NaN	625668	829043	NaN	670585	569836	818785	NaN	NaN	NaN	NaN	NaN	NaN	875999	NaN	133312	NaN	NaN	806045	979266	891838	NaN	NaN	555208	455612	1169848	888531	NaN	NaN	NaN	NaN	NaN
O15357	INPPL1	Phosphatidylinositol 3,4,5-trisphosphate 5-phosphatase 2	SHIP2_HUMAN	699898	45901.1	126077	99714	138815	94923.9	122565	129819	7412.95	154899	386388	41678.7	731290	692146	87708.1	43886.2	114848	NaN	300522	186846	35644.8	113873	61742.7	62872.1	96491.4	681098	100027	223751	164377	81228.3	134735	118834	289390	135730	53575	111498	189510	386739	706195	52584.9	192633	NaN	NaN	229738	226737	219928
O15371	EIF3D	Eukaryotic translation initiation factor 3 subunit D	EIF3D_HUMAN	1.39363	NaN	1308.67	NaN	1.23112	1.24128	NaN	3862.4	NaN	1	1	935.263	1.05133	7711.67	1645.34	1405.87	4.31492	NaN	2055.46	2347.72	1283.78	2375.89	1997.42	1303.82	1174.14	8273.48	NaN	3650.73	3296.8	NaN	2579.05	1822.2	4401.17	1165.61	1206.87	1.0817	1738.42	5460.65	7787.24	2253.97	1128.46	1501.44	1	1.03556	4381.38	4919.24
O15372	EIF3H	Eukaryotic translation initiation factor 3 subunit H	EIF3H_HUMAN	NaN	NaN	NaN	NaN	NaN	NaN	NaN	NaN	NaN	NaN	NaN	NaN	NaN	NaN	NaN	NaN	NaN	NaN	NaN	NaN	NaN	NaN	NaN	NaN	NaN	NaN	NaN	NaN	NaN	NaN	NaN	NaN	NaN	NaN	NaN	NaN	NaN	1	NaN	NaN	NaN	NaN	NaN	NaN	NaN	NaN
O15394	NCAM2	Neural cell adhesion molecule 2	NCAM2_HUMAN	56918.9	68619.7	61784.9	53018.6	151933	75543.7	30815.4	37986.5	45509.2	38782.1	75572	100952	79509.4	112066	83394.2	84114.8	151603	219270	56412.9	52805.6	59715.7	50798.5	44821.5	60131.7	99807.9	116060	75377.9	77237	58115.1	120422	66046.9	61438.4	58146.5	77434.6	84732.7	79978.2	52804	52697.9	97068	31829.5	65532.7	71783	46450	51343.7	111696	88789.8
O15397	IPO8	Importin-8	IPO8_HUMAN	NaN	NaN	20445	1.30709	NaN	10958.7	NaN	NaN	29018.6	1	NaN	5636.65	11265.8	NaN	NaN	NaN	42948.4	NaN	6651.24	7807.88	NaN	NaN	NaN	NaN	NaN	NaN	23783.9	NaN	NaN	18317.8	NaN	NaN	NaN	NaN	NaN	NaN	4403.17	11566	NaN	NaN	NaN	NaN	NaN	7358	NaN	NaN
O15400	STX7	Syntaxin-7	STX7_HUMAN	NaN	NaN	NaN	NaN	NaN	NaN	1	NaN	NaN	NaN	58.3331	223.704	1.05133	NaN	NaN	NaN	NaN	NaN	NaN	NaN	NaN	NaN	NaN	NaN	NaN	NaN	NaN	NaN	NaN	NaN	1.03778	NaN	1.08332	NaN	NaN	NaN	NaN	NaN	NaN	NaN	NaN	NaN	NaN	NaN	NaN	NaN
O15427	SLC16A3	Monocarboxylate transporter 4	MOT4_HUMAN	1.39363	NaN	NaN	NaN	NaN	NaN	NaN	1.21511	NaN	517.719	NaN	NaN	1.05133	NaN	NaN	452.094	NaN	NaN	NaN	NaN	NaN	1	NaN	NaN	NaN	NaN	NaN	NaN	NaN	NaN	NaN	1.13403	NaN	NaN	NaN	1.08169	1.07838	1	NaN	NaN	NaN	NaN	NaN	1.03556	NaN	1.31998
O15439	ABCC4	ATP-binding cassette sub-family C member 4	MRP4_HUMAN	NaN	23295.9	22374.6	5823.2	NaN	22517.3	1	290797	NaN	25685.1	8388.07	NaN	18887.4	NaN	NaN	29663.9	24045.7	NaN	1	6891.59	85413.8	NaN	6418.33	27042.5	16280.3	NaN	42892.5	NaN	NaN	NaN	5354.42	NaN	4610.9	31439.5	1.21629	7107.06	6144.62	1471231	NaN	8810.26	700298	31122.3	NaN	131.465	NaN	21256.9
O15455	TLR3	Toll-like receptor 3	TLR3_HUMAN	NaN	NaN	43219.4	1.30708	1.23112	NaN	12471.4	1.21511	7972.89	28181	NaN	NaN	NaN	NaN	NaN	NaN	NaN	NaN	NaN	57343.3	NaN	3178.71	15354.9	12518.2	NaN	NaN	NaN	NaN	18068.3	10882.6	1.03778	NaN	48756.9	7779.51	NaN	23760.4	6604.6	6712.96	20856.8	27195.3	NaN	42191	7881.76	60091.1	NaN	1.31997
O15457	MSH4	MutS protein homolog 4	MSH4_HUMAN	21067.5	18511.9	NaN	22789.9	NaN	NaN	NaN	21167.6	NaN	NaN	22186.5	NaN	NaN	NaN	43800.8	14393.7	NaN	NaN	NaN	41700.5	NaN	1	NaN	NaN	NaN	15140.5	20382.7	NaN	NaN	NaN	96191.4	NaN	1.08332	NaN	NaN	NaN	27482.8	1404.39	25273.2	10959.6	38090	NaN	1499	NaN	51431.9	NaN
O15467	CCL16	C-C motif chemokine 16	CCL16_HUMAN	NaN	NaN	NaN	NaN	NaN	NaN	NaN	NaN	82137	NaN	NaN	NaN	9747.58	NaN	NaN	NaN	NaN	86419.8	NaN	NaN	NaN	NaN	NaN	7563.56	NaN	NaN	NaN	NaN	NaN	NaN	NaN	NaN	NaN	NaN	NaN	NaN	NaN	NaN	NaN	NaN	NaN	NaN	NaN	NaN	NaN	NaN
O15482	TEX28P2	Testis-specific protein TEX28	TEX28_HUMAN	NaN	NaN	NaN	NaN	NaN	15455.6	NaN	NaN	NaN	NaN	NaN	NaN	NaN	NaN	NaN	NaN	NaN	NaN	NaN	NaN	NaN	NaN	NaN	8670.37	NaN	NaN	NaN	NaN	NaN	NaN	NaN	NaN	NaN	NaN	NaN	1.08169	NaN	NaN	NaN	NaN	1.14119	NaN	NaN	NaN	NaN	NaN
O15511	ARPC5	Actin-related protein 2/3 complex subunit 5	ARPC5_HUMAN	1.39363	1.81311	1	53783	NaN	59524.1	NaN	19633	NaN	15354.3	NaN	1.04698	11867.5	NaN	NaN	NaN	NaN	NaN	1	NaN	11626.9	16407.5	NaN	NaN	1.27012	1.49744	NaN	NaN	NaN	NaN	NaN	NaN	18399.2	NaN	22102.5	1.0817	NaN	11662	NaN	10895	31433.8	1.61184	1	19586.4	31248.3	5217.14
O15528	CYP27B1	25-hydroxyvitamin D-1 alpha hydroxylase, mitochondrial	CP27B_HUMAN	NaN	15834.8	16684.7	18476.1	NaN	25.0738	12827.5	21564.8	26939.6	NaN	23125.5	18389.6	NaN	26531.8	12489.2	5.44623e+06	NaN	NaN	NaN	3.82979e+06	844080	3.08274e+06	18462.9	6875.79	21452.5	21627.9	26243.2	22278.8	43663.8	NaN	NaN	34508.7	36826.5	36172.2	1.95367e+06	22990.3	36953.7	NaN	8792623	29389.4	26124.9	31578.1	NaN	56560.9	NaN	22075
O15534	PER1	Period circadian protein homolog 1	PER1_HUMAN	57904.9	148308	75650.7	239827	1.23112	351890	134632	118611	188010	168347	192935	1.04698	22452.7	1.51263e+06	92244.4	99469.9	221222	4871967	48964.8	91455.9	130664	118206	91614.1	60102.2	100807	37082	100402	34977.3	113182	105298	91571.4	92030.3	103027	128390	269566	180266	104122	70136.4	79408	156604	114201	81992.4	52203.3	70734.6	128638	91094.3
O15540	FABP7	Fatty acid-binding protein, brain	FABP7_HUMAN	NaN	NaN	NaN	NaN	NaN	NaN	NaN	NaN	NaN	NaN	NaN	NaN	NaN	NaN	NaN	NaN	NaN	NaN	NaN	NaN	NaN	NaN	NaN	NaN	NaN	NaN	NaN	NaN	NaN	NaN	NaN	NaN	NaN	NaN	NaN	NaN	NaN	3551.13	NaN	NaN	NaN	NaN	NaN	NaN	NaN	NaN
O43150	ASAP2	Arf-GAP with SH3 domain, ANK repeat and PH domain-containing protein 2	ASAP2_HUMAN	NaN	NaN	NaN	NaN	NaN	NaN	NaN	NaN	NaN	NaN	NaN	NaN	NaN	NaN	NaN	NaN	NaN	NaN	6882.76	NaN	NaN	8328.27	NaN	NaN	NaN	NaN	NaN	NaN	NaN	NaN	NaN	NaN	NaN	NaN	NaN	NaN	NaN	NaN	NaN	35679.4	NaN	NaN	NaN	NaN	NaN	NaN
O43157	PLXNB1	Plexin-B1	PLXB1_HUMAN	297520	227286	166934	291911	282647	309732	193585	259895	262950	239035	151847	236865	182391	238165	223624	133463	385612	191311	194010	229871	303252	184362	229770	177773	247084	363869	236788	264597	273083	251337	173132	283091	143090	197574	285115	140592	235625	147669	274082	193202	373090	212675	162243	273314	176641	247254
O43173	ST8SIA3	Sia-alpha-2,3-Gal-beta-1,4-GlcNAc-R:alpha 2,8-sialyltransferase	SIA8C_HUMAN	NaN	NaN	NaN	NaN	NaN	NaN	NaN	NaN	NaN	NaN	NaN	NaN	NaN	NaN	NaN	NaN	NaN	NaN	NaN	NaN	NaN	NaN	NaN	NaN	NaN	NaN	NaN	NaN	NaN	NaN	NaN	NaN	NaN	NaN	NaN	NaN	NaN	NaN	NaN	NaN	NaN	NaN	NaN	NaN	NaN	NaN
O43175	PHGDH	D-3-phosphoglycerate dehydrogenase	SERA_HUMAN	NaN	NaN	NaN	NaN	NaN	NaN	NaN	2436.94	NaN	NaN	225592	NaN	NaN	NaN	NaN	NaN	NaN	NaN	NaN	NaN	NaN	NaN	NaN	NaN	NaN	NaN	NaN	NaN	NaN	NaN	NaN	NaN	NaN	NaN	NaN	NaN	NaN	25479.1	NaN	NaN	NaN	NaN	NaN	NaN	NaN	NaN
O43189	PHF1	PHD finger protein 1	PHF1_HUMAN	NaN	NaN	NaN	NaN	NaN	NaN	NaN	NaN	NaN	NaN	NaN	NaN	NaN	NaN	NaN	NaN	NaN	NaN	NaN	NaN	NaN	NaN	NaN	NaN	NaN	10524.3	NaN	NaN	NaN	NaN	NaN	NaN	1.08333	NaN	NaN	NaN	NaN	NaN	8428.28	NaN	NaN	NaN	NaN	NaN	NaN	NaN
O43194	GPR39	G-protein coupled receptor 39	GPR39_HUMAN	1.39363	NaN	NaN	NaN	28815.4	NaN	NaN	NaN	NaN	NaN	NaN	NaN	1.05133	5259.37	NaN	NaN	NaN	NaN	NaN	NaN	NaN	NaN	NaN	NaN	NaN	1.49744	NaN	NaN	NaN	NaN	NaN	NaN	1.08332	NaN	NaN	NaN	1.07838	NaN	NaN	NaN	NaN	NaN	NaN	NaN	NaN	NaN
O43236	SEPTIN4	Septin-4	SEPT4_HUMAN	NaN	NaN	NaN	NaN	NaN	NaN	NaN	NaN	NaN	NaN	NaN	NaN	NaN	NaN	NaN	NaN	NaN	NaN	NaN	NaN	NaN	NaN	NaN	NaN	NaN	NaN	NaN	NaN	NaN	NaN	NaN	NaN	NaN	NaN	NaN	NaN	NaN	1	NaN	NaN	NaN	NaN	NaN	NaN	NaN	NaN
O43240	KLK10	Kallikrein-10	KLK10_HUMAN	NaN	NaN	NaN	NaN	NaN	NaN	NaN	5147.88	NaN	1743.21	NaN	NaN	NaN	NaN	NaN	NaN	NaN	NaN	NaN	NaN	NaN	NaN	NaN	NaN	NaN	NaN	NaN	NaN	NaN	NaN	NaN	NaN	NaN	NaN	NaN	NaN	NaN	66295.1	NaN	NaN	NaN	NaN	NaN	NaN	5926.76	NaN
O43247	TEX33	Testis-expressed protein 33	TEX33_HUMAN	256156	NaN	30624.7	NaN	NaN	18241.1	11942.9	NaN	NaN	21202.9	30466.8	5437.65	86067.1	302482	NaN	20919.4	NaN	NaN	44043.3	19628.7	12759.9	NaN	NaN	5996.56	NaN	378916	NaN	NaN	20159.5	NaN	NaN	NaN	26838.4	NaN	NaN	NaN	12548.2	NaN	320292	NaN	NaN	NaN	NaN	53574.4	NaN	NaN
O43252	PAPSS1	Bifunctional 3'-phosphoadenosine 5'-phosphosulfate synthase 1	PAPS1_HUMAN	NaN	NaN	NaN	NaN	NaN	NaN	NaN	NaN	NaN	NaN	NaN	NaN	NaN	NaN	NaN	NaN	27049.8	NaN	NaN	NaN	NaN	NaN	NaN	NaN	NaN	NaN	NaN	NaN	NaN	NaN	NaN	NaN	NaN	NaN	NaN	NaN	NaN	NaN	NaN	NaN	NaN	19335	NaN	NaN	21535.1	NaN
O43264	ZW10	Centromere/kinetochore protein zw10 homolog	ZW10_HUMAN	36977.6	NaN	NaN	31338.3	11853.9	23302.5	31088.3	NaN	15915	34084	35076.4	NaN	24320.4	NaN	NaN	44817.7	NaN	NaN	NaN	35563.5	NaN	37910.4	NaN	21187.1	27869	76429.7	34258.5	NaN	24776.9	23014.6	32647.4	NaN	53076.4	28957.9	NaN	47922.9	35845	35591.8	53358.8	31126.5	39566.8	17468.5	29416.1	20778.6	58392.1	33620.5
O43278	SPINT1	Kunitz-type protease inhibitor 1	SPIT1_HUMAN	73649.6	24102.4	22980	58582.6	9139.96	26618.9	27641.1	22995	28882.2	80950.8	24214.4	72521.6	23718.1	90830.5	11652.9	41788.8	99340.8	14209.4	43569.2	50827.3	784100	53269.9	27748.1	16358.5	35036.6	126572	112618	76308	63630.2	8108.74	40447.6	16452.2	94863.3	91623.8	23375.9	18926.9	29713.9	27484.4	138274	35331.8	27825.3	70725.1	18618	22409.8	55073.6	44847.3
O43280	TREH	Trehalase	TREA_HUMAN	27418.5	5004.83	NaN	37195.9	3857.83	11974.6	19563.8	1796.89	NaN	NaN	NaN	27977.4	1.05133	34413.4	1766.17	21009.7	NaN	NaN	33971.9	NaN	13531.6	20127.4	56798.3	24514.8	34489.1	10285.8	NaN	20121.6	29506.2	NaN	22470.4	NaN	NaN	3593.46	38141.9	101593	22314.5	28537.8	40758.8	23506.7	1.14119	10926.3	26769.1	NaN	22915.9	9975.2
O43291	SPINT2	Kunitz-type protease inhibitor 2	SPIT2_HUMAN	1.39363	NaN	NaN	NaN	NaN	NaN	NaN	NaN	NaN	NaN	NaN	1591.12	NaN	NaN	NaN	NaN	NaN	NaN	NaN	NaN	41714.2	NaN	NaN	NaN	NaN	NaN	NaN	NaN	10090.5	NaN	NaN	NaN	2733.21	NaN	NaN	2376.99	NaN	NaN	1598.84	NaN	NaN	NaN	1	NaN	NaN	NaN
O43310	CTIF	CBP80/20-dependent translation initiation factor	CTIF_HUMAN	5444.33	NaN	NaN	NaN	NaN	NaN	NaN	NaN	NaN	NaN	NaN	NaN	47172	NaN	NaN	NaN	NaN	NaN	12112.5	NaN	NaN	NaN	7282.54	NaN	16677.8	NaN	NaN	30796	NaN	NaN	3549.16	NaN	NaN	NaN	NaN	NaN	NaN	NaN	NaN	7473.06	NaN	16578.3	NaN	4562.6	26726.3	28330
O43395	PRPF3	U4/U6 small nuclear ribonucleoprotein Prp3	PRPF3_HUMAN	584076	NaN	NaN	345109	NaN	NaN	717912	NaN	NaN	NaN	1.4899e+06	536201	NaN	895896	NaN	1.13996e+06	NaN	NaN	NaN	NaN	NaN	237879	276705	NaN	NaN	NaN	313165	124204	NaN	NaN	302110	1.0286e+06	NaN	672591	312269	115466	NaN	516432	802611	NaN	NaN	108695	NaN	387658	1.03969e+06	691221
O43396	TXNL1	Thioredoxin-like protein 1	TXNL1_HUMAN	18647.5	20791.8	1	16792.5	7218.38	44517.4	13811.8	10083.3	NaN	27698.9	8884.92	6324.72	4777.02	17937	2.07502	1	NaN	58714.3	40620.3	23439.6	1.19808	23188.2	NaN	6601.49	19175.1	10238	21787.9	19847.2	31692.9	16866.1	100642	1.13404	1.08332	NaN	16334.8	1.0817	72758	54086.7	8815.18	3624.34	12506.6	1.61184	31213.5	20941.5	17743.2	10642.8
O43399	TPD52L2	Tumor protein D54	TPD54_HUMAN	NaN	NaN	NaN	NaN	NaN	1648.91	NaN	NaN	NaN	NaN	NaN	NaN	NaN	NaN	NaN	NaN	NaN	NaN	NaN	NaN	1.19808	NaN	NaN	NaN	NaN	NaN	NaN	NaN	NaN	NaN	NaN	NaN	1.08332	1.23584	1.21629	NaN	NaN	4789.42	NaN	NaN	NaN	NaN	NaN	1464.81	NaN	NaN
O43405	COCH	Cochlin	COCH_HUMAN	NaN	NaN	NaN	NaN	NaN	NaN	NaN	NaN	NaN	NaN	NaN	NaN	NaN	NaN	NaN	NaN	NaN	NaN	NaN	NaN	NaN	NaN	NaN	NaN	NaN	NaN	NaN	NaN	NaN	NaN	NaN	NaN	NaN	NaN	NaN	NaN	13606.9	NaN	NaN	NaN	NaN	NaN	12962.2	NaN	NaN	NaN
O43424	GRID2	Glutamate receptor ionotropic, delta-2	GRID2_HUMAN	NaN	NaN	NaN	NaN	NaN	NaN	NaN	NaN	NaN	NaN	NaN	NaN	NaN	NaN	NaN	NaN	NaN	NaN	NaN	NaN	NaN	NaN	NaN	NaN	NaN	9170.03	NaN	NaN	NaN	NaN	NaN	NaN	NaN	NaN	NaN	NaN	NaN	NaN	NaN	NaN	NaN	NaN	NaN	NaN	NaN	NaN
O43451	MGAM	Maltase-glucoamylase	MGA_HUMAN	7273.49	6526.52	7334.38	NaN	37508.9	16357.3	67540.8	424.657	NaN	2159.13	83224.2	NaN	46049.4	4061.4	NaN	116787	NaN	1.03068	81519.8	63036.5	1.19808	48851.1	211254	172832	21823.9	NaN	1.14764	78012.5	1.27139	431465	4205.98	176861	182061	77112.5	1.21631	63471.8	NaN	21964.9	110569	228928	52444.4	NaN	68682	115088	127.078	NaN
O43488	AKR7A2	Aflatoxin B1 aldehyde reductase member 2	ARK72_HUMAN	8275.66	NaN	NaN	NaN	NaN	1.24128	6729.6	NaN	NaN	9786.84	NaN	NaN	NaN	NaN	NaN	NaN	NaN	NaN	NaN	NaN	NaN	6232.85	NaN	NaN	3553.76	NaN	NaN	NaN	1.27138	NaN	9492.17	3539.2	6015.29	NaN	13042	NaN	36066	NaN	NaN	NaN	10213.1	NaN	6149.39	2191.63	NaN	NaN
O43493	TGOLN2	Trans-Golgi network integral membrane protein 2	TGON2_HUMAN	23240.7	15360.9	30838.7	6199.67	35101.2	12419.1	15907.4	25698.3	22339.1	16534.9	21813.2	24541.5	41755.7	9329.03	13000.4	21947	21781.7	9614.32	19298.3	25324.8	33747.3	23722.1	22277	15883	28418.8	12712	23078.5	8593.09	15972.9	18107.5	25777.4	10632.4	6597.55	8688	8298.4	14837.2	19747.7	15986.8	15300.9	22417	19196.5	9894.55	32626.7	48096.6	18990.1	14750.7
O43505	B4GAT1	Beta-1,4-glucuronyltransferase 1	B4GA1_HUMAN	234674	257197	178476	85730.1	120178	146718	183170	103661	162193	94850.6	94025	148735	142484	207946	191975	178430	226461	146480	214824	91520	261994	154053	125654	155951	185343	237979	163149	158293	295095	215205	124168	119785	342053	245956	298228	235628	116459	176442	195640	170959	131635	315956	142056	232967	290169	221141
O43511	SLC26A4	Pendrin	S26A4_HUMAN	1.39363	NaN	1	1.30707	NaN	1.24128	1	NaN	NaN	1	NaN	NaN	NaN	NaN	NaN	NaN	NaN	NaN	1	NaN	NaN	NaN	1.04106	1	NaN	NaN	NaN	NaN	NaN	NaN	NaN	1.13403	NaN	NaN	NaN	NaN	NaN	NaN	1.35086	1	NaN	NaN	NaN	NaN	NaN	NaN
O43526	KCNQ2	Potassium voltage-gated channel subfamily KQT member 2	KCNQ2_HUMAN	NaN	18077.6	7990.32	482624	586.547	1.24128	9512.75	NaN	NaN	NaN	NaN	NaN	1.05133	NaN	NaN	1	NaN	6500.58	1	6876.82	5875.02	1	NaN	20780.8	NaN	40162.1	1.14764	NaN	1964.4	5766.1	16452	NaN	NaN	1.23584	11434.5	NaN	12904.4	1	NaN	16099.2	4260.72	NaN	1	1.03556	1.65533	1.31998
O43529	CHST10	Carbohydrate sulfotransferase 10	CHSTA_HUMAN	25999.7	22103.5	1260.16	NaN	NaN	NaN	26135.4	NaN	17672.5	NaN	NaN	25046.4	NaN	34425.7	NaN	NaN	NaN	NaN	17111.2	NaN	13815.7	NaN	NaN	NaN	NaN	28975.6	19808.9	NaN	NaN	8696.34	NaN	NaN	NaN	NaN	1936.17	NaN	NaN	NaN	NaN	NaN	NaN	19550.3	16830.1	NaN	37427.3	36546
O43548	TGM5	Protein-glutamine gamma-glutamyltransferase 5	TGM5_HUMAN	NaN	NaN	NaN	NaN	NaN	NaN	NaN	2052.23	2.70598	NaN	NaN	NaN	NaN	NaN	NaN	NaN	NaN	NaN	1	NaN	NaN	NaN	NaN	NaN	NaN	NaN	NaN	NaN	1.27138	NaN	NaN	NaN	NaN	NaN	NaN	NaN	NaN	57489.1	NaN	NaN	292.274	NaN	NaN	NaN	1.65534	NaN
O43556	SGCE	Epsilon-sarcoglycan	SGCE_HUMAN	NaN	NaN	NaN	NaN	NaN	1.24128	NaN	NaN	2.70596	NaN	NaN	NaN	NaN	NaN	NaN	NaN	5579.94	NaN	NaN	NaN	4249.5	NaN	NaN	NaN	NaN	NaN	NaN	NaN	NaN	NaN	NaN	NaN	NaN	NaN	NaN	NaN	NaN	NaN	NaN	NaN	NaN	NaN	NaN	6037.09	NaN	1.31997
O43598	DNPH1	2'-deoxynucleoside 5'-phosphate N-hydrolase 1	DNPH1_HUMAN	NaN	NaN	NaN	16574.7	NaN	21808.8	32149.2	NaN	NaN	13923	7559.43	7265.85	NaN	NaN	14852.6	NaN	NaN	NaN	NaN	6470.97	11553.6	11191.8	NaN	NaN	27731	NaN	NaN	4925.88	29472.7	NaN	20384.9	8956.28	NaN	NaN	NaN	NaN	11542	33851.3	12586.2	NaN	161354	18411	12162.1	NaN	5080.75	NaN
O43653	PSCA	Prostate stem cell antigen	PSCA_HUMAN	NaN	NaN	NaN	NaN	NaN	4100.12	NaN	NaN	NaN	NaN	NaN	NaN	NaN	NaN	NaN	NaN	NaN	NaN	NaN	NaN	188618	6771.28	NaN	NaN	10817.6	NaN	NaN	NaN	NaN	NaN	NaN	NaN	2933.56	NaN	NaN	NaN	NaN	11035.6	NaN	NaN	NaN	10923.4	15995.6	NaN	2649.19	NaN
O43674	NDUFB5	NADH dehydrogenase [ubiquinone] 1 beta subcomplex subunit 5, mitochondrial	NDUB5_HUMAN	1.39363	1.81311	1	1.30709	NaN	1.24128	NaN	34249.3	221708	10240.9	8906.99	15615.2	1.05133	NaN	2.07502	1	4.31492	NaN	8371.47	2369.92	6381.37	1	25209.2	45467.6	14826.5	NaN	25239.5	21756.9	1.27138	1	1.03778	27787.7	42835.9	19962.4	10616.7	1.0817	26674.2	1	NaN	14398.2	58027.2	1.61184	11728.1	NaN	1.65535	1.31997
O43681	GET3	ATPase GET3	GET3_HUMAN	NaN	NaN	NaN	NaN	NaN	NaN	9655.52	7975.57	NaN	4941.48	NaN	NaN	NaN	NaN	NaN	NaN	NaN	NaN	NaN	NaN	NaN	NaN	NaN	NaN	NaN	NaN	NaN	NaN	NaN	NaN	NaN	NaN	NaN	NaN	NaN	NaN	12167.2	35457.5	NaN	NaN	NaN	NaN	NaN	NaN	NaN	NaN
O43683	BUB1	Mitotic checkpoint serine/threonine-protein kinase BUB1	BUB1_HUMAN	273934	160196	57204	184685	102811	265326	144741	192784	77900	206581	98890.9	184905	200534	117120	164068	102788	61320.6	74354	183976	169216	84679.7	146624	168367	175945	216525	340398	171875	320167	225686	225470	121950	280520	255804	199220	153709	202303	286604	130893	235889	42741.9	181910	149283	236460	88055.4	127971	273692
O43707	ACTN4	Alpha-actinin-4	ACTN4_HUMAN	4201.71	NaN	NaN	10193.5	19823.4	12691.8	NaN	11827.3	NaN	NaN	1	NaN	NaN	NaN	NaN	62520.8	NaN	NaN	3978.34	NaN	16059.4	14079.9	NaN	25860.6	NaN	19156.5	NaN	NaN	1.27139	49339.3	NaN	1.13403	1.08332	NaN	25404.5	NaN	NaN	108563	37293.7	1	16637.8	1.61184	NaN	1.08932e+06	41880.7	1.31997
O43719	HTATSF1	HIV Tat-specific factor 1	HTSF1_HUMAN	NaN	NaN	NaN	NaN	NaN	NaN	NaN	NaN	NaN	NaN	NaN	NaN	NaN	NaN	NaN	NaN	NaN	NaN	NaN	NaN	NaN	NaN	NaN	NaN	NaN	NaN	NaN	NaN	NaN	NaN	NaN	NaN	NaN	NaN	NaN	NaN	NaN	NaN	NaN	NaN	14681.2	NaN	1	10077.5	NaN	NaN
O43745	CHP2	Calcineurin B homologous protein 2	CHP2_HUMAN	131701	205773	88578.2	185316	85949	121845	125026	129690	85856.4	85164.4	134186	132873	98365	246722	253456	166483	100001	5323.9	120465	93465.1	59234.5	125517	187753	155143	261851	263813	128748	193170	116591	107879	185205	215959	216211	200097	193989	205943	186010	101051	230004	154299	66852.1	171273	84216.2	223602	139782	150957
O43747	AP1G1	AP-1 complex subunit gamma-1	AP1G1_HUMAN	NaN	NaN	NaN	NaN	NaN	1609.7	NaN	NaN	NaN	NaN	NaN	NaN	NaN	NaN	NaN	NaN	NaN	NaN	NaN	NaN	7926.01	NaN	NaN	NaN	NaN	NaN	NaN	NaN	NaN	NaN	NaN	NaN	NaN	NaN	NaN	NaN	NaN	4167.56	NaN	NaN	1.14119	NaN	NaN	NaN	NaN	NaN
O43791	SPOP	Speckle-type POZ protein	SPOP_HUMAN	NaN	NaN	NaN	NaN	NaN	NaN	NaN	NaN	NaN	NaN	NaN	NaN	NaN	NaN	NaN	NaN	39774.9	NaN	NaN	NaN	NaN	NaN	NaN	NaN	NaN	106455	NaN	285600	NaN	496270	NaN	NaN	NaN	NaN	NaN	NaN	NaN	NaN	NaN	18570.6	NaN	NaN	NaN	NaN	NaN	62808.8
O43809	NUDT21	Cleavage and polyadenylation specificity factor subunit 5	CPSF5_HUMAN	NaN	NaN	NaN	NaN	NaN	NaN	NaN	NaN	8688.76	NaN	NaN	NaN	NaN	NaN	NaN	NaN	NaN	NaN	NaN	NaN	4963.99	NaN	NaN	NaN	NaN	NaN	NaN	NaN	NaN	NaN	NaN	NaN	NaN	NaN	NaN	NaN	NaN	NaN	NaN	NaN	NaN	NaN	NaN	NaN	NaN	NaN
O43818	RRP9	U3 small nucleolar RNA-interacting protein 2	U3IP2_HUMAN	NaN	NaN	NaN	NaN	NaN	NaN	NaN	NaN	NaN	NaN	NaN	NaN	NaN	NaN	40303.4	NaN	NaN	NaN	1	NaN	NaN	NaN	NaN	NaN	68071.5	NaN	NaN	NaN	NaN	NaN	NaN	NaN	NaN	1.23584	NaN	NaN	1.07838	NaN	NaN	NaN	NaN	NaN	6344.85	NaN	NaN	NaN
O43852	CALU	Calumenin	CALU_HUMAN	25560.9	78023	20290.4	22614.6	7076.64	179008	17170.8	30532.8	NaN	3285.51	701.362	24004.9	9649.48	30347.9	NaN	1	NaN	10232	10329.7	8546.08	17230.9	9567.35	7689.26	NaN	NaN	8336.97	9704.79	NaN	NaN	83884.5	10215.5	NaN	7339.49	8493.06	34888.2	2549.36	NaN	20145.1	8878.16	4752.42	35436.7	9742.01	6336.94	6446.62	12846.8	11952.3
O43866	CD5L	CD5 antigen-like	CD5L_HUMAN	6097692	3235074	6780310	4004835	14637915	4133777	4.45854e+06	2.62963e+06	5.34399e+06	10131349	6348405	3.48486e+06	4691021	6.57104e+06	5.74873e+06	4387526	3400234	49403660	4698399	2184619	2050727	4809962	3655954	2.60634e+06	4.24149e+06	6.89508e+06	2.57248e+06	6832640	3563292	7.9551e+06	3.16564e+06	3.45534e+06	4.50456e+06	21175758	3.1348e+06	4931975	4.04258e+06	5.29631e+06	5719412	10121101	3.47098e+06	5.65327e+06	9174088	9847884	11706220	9405762
O43895	XPNPEP2	Xaa-Pro aminopeptidase 2	XPP2_HUMAN	54838.6	65622	41490.4	58120.2	67986.7	90290.3	11731.3	28402.7	78787.1	509658	50230.7	NaN	16408.9	21309.5	82604.6	1	91734.1	9485.07	42252.1	21251.5	35605.5	46531.9	56578.6	172383	57276.5	49643.6	73950.9	160483	NaN	209736	29838.5	62763.9	29211.9	168069	35096	142163	943033	6601.61	64825.2	86090.8	116488	80616.8	354.573	889857	NaN	166448
O60216	RAD21	Double-strand-break repair protein rad21 homolog	RAD21_HUMAN	27601.2	163861	91021.5	76113.9	411353	81560.1	66229.5	55690.8	781560	51249.8	85334.3	38484	69213.3	37018.5	138204	66967.7	379186	215010	65431.2	74385.1	79182.5	21805.7	46764.8	79698.6	172395	45610.5	70025.7	134795	107135	511285	36666.2	85046.7	82055	106875	81692.2	21263.1	68670.3	47875	27480.3	116297	73248.6	43363.6	228574	56307.4	246763	115819
O60218	AKR1B10	Aldo-keto reductase family 1 member B10	AK1BA_HUMAN	NaN	NaN	1	NaN	NaN	NaN	NaN	37035.3	NaN	NaN	NaN	NaN	NaN	NaN	NaN	NaN	NaN	NaN	NaN	NaN	44381.3	NaN	NaN	NaN	NaN	NaN	NaN	NaN	NaN	NaN	NaN	NaN	NaN	NaN	NaN	NaN	NaN	NaN	NaN	13033.1	2269.39	NaN	NaN	NaN	NaN	NaN
O60231	DHX16	Pre-mRNA-splicing factor ATP-dependent RNA helicase DHX16	DHX16_HUMAN	69333.2	13713.6	10358.5	11820.9	NaN	NaN	4129.53	19165.4	NaN	25773.2	13282.6	14002.4	NaN	49435.1	14069.8	9333.7	NaN	NaN	8704.01	16510.2	NaN	5486.46	NaN	NaN	6480.43	81462.3	20591.1	53591.9	34125.5	NaN	5821.57	16013.5	26990.6	8364.75	9580.54	NaN	15325.5	NaN	59348.6	NaN	NaN	49514.8	NaN	56767.7	NaN	NaN
O60234	GMFG	Glia maturation factor gamma	GMFG_HUMAN	5434.77	7390.27	NaN	199665	1.23112	81671.5	1	46951.5	NaN	166170	296951	NaN	NaN	NaN	103901	1	186731	NaN	1	NaN	NaN	11875.3	8562.75	NaN	NaN	63051.1	NaN	NaN	NaN	NaN	1.03778	NaN	18837.7	11662.9	13124.4	NaN	9601.17	36927.2	NaN	NaN	10003.5	NaN	1	15250.8	1.65533	NaN
O60259	KLK8	Kallikrein-8	KLK8_HUMAN	NaN	NaN	NaN	NaN	NaN	NaN	NaN	NaN	NaN	NaN	NaN	NaN	NaN	NaN	NaN	NaN	NaN	NaN	NaN	1	NaN	NaN	NaN	NaN	NaN	NaN	NaN	NaN	NaN	NaN	NaN	NaN	NaN	NaN	NaN	NaN	NaN	2878.03	NaN	NaN	NaN	NaN	2411.14	NaN	NaN	NaN
O60279	SUSD5	Sushi domain-containing protein 5	SUSD5_HUMAN	47384.4	151161	117334	199932	9101.93	266633	465473	48085	67810.3	157259	566410	372185	2190226	524304	236170	435617	299078	420495	730098	378619	75586.5	327376	175094	331497	187528	549088	220714	408872	333085	417222	275700	428044	84550	313067	58454.8	184645	122969	716727	475001	113754	441493	72030	99905.7	571061	324603	227198
O60287	URB1	Nucleolar pre-ribosomal-associated protein 1	NPA1P_HUMAN	7.46329e+06	424292	871612	797106	2.08071e+06	804900	966052	808305	126289	1.42433e+06	2.25208e+06	1.02814e+06	4.0308e+06	7803112	1.17848e+06	1.98834e+06	5916547	1.91013e+06	1.71022e+06	2.25036e+06	1.97425e+06	573143	499246	2922250	689727	15578144	760924	1.81694e+06	761167	1.60829e+06	815360	716038	1.53046e+06	1.05933e+06	518287	752661	812257	1.20445e+06	6.77145e+06	389077	1.13379e+06	278256	217146	1.12137e+06	1.00715e+06	867328
O60315	ZEB2	Zinc finger E-box-binding homeobox 2	ZEB2_HUMAN	NaN	NaN	12122.3	NaN	49978	NaN	NaN	NaN	27869.5	NaN	7635.57	NaN	NaN	NaN	NaN	NaN	NaN	NaN	NaN	NaN	NaN	NaN	NaN	9686.48	6994.73	NaN	NaN	1.6486	7614.05	NaN	NaN	9181.44	NaN	NaN	NaN	NaN	NaN	NaN	NaN	7037.1	1.14119	NaN	18944.3	NaN	NaN	NaN
O60361	NME2P1	Putative nucleoside diphosphate kinase	NDK8_HUMAN	19106.2	36832	9024.16	40285.7	NaN	77105.5	53599.8	45332.4	NaN	31974.7	11451.3	7553.74	14847.7	29532.1	12816.5	11348.3	NaN	1.03068	15661.7	23442.1	48219.6	6978.78	37938.9	1672.4	12584.7	29379.5	1.14763	71440.4	9883.35	9708.88	18183.5	29414	28064.5	1.23583	9219.13	27075.3	77281.8	31048.7	8276.01	1	34776.2	36647.9	16402.2	28861.2	55553.3	14867.6
O60423	ATP8B3	Phospholipid-transporting ATPase IK	AT8B3_HUMAN	NaN	NaN	64755.7	NaN	NaN	NaN	NaN	NaN	NaN	NaN	NaN	NaN	341473	NaN	NaN	168033	NaN	NaN	53376	63906.2	NaN	29323.1	NaN	NaN	NaN	NaN	NaN	NaN	NaN	NaN	NaN	NaN	NaN	NaN	NaN	NaN	NaN	NaN	NaN	NaN	NaN	NaN	31953.9	NaN	NaN	NaN
O60437	PPL	Periplakin	PEPL_HUMAN	1.39363	1.81311	NaN	NaN	NaN	NaN	NaN	NaN	NaN	NaN	NaN	NaN	NaN	NaN	2.07499	NaN	NaN	NaN	1	NaN	991.964	1	NaN	NaN	NaN	NaN	NaN	NaN	NaN	NaN	NaN	NaN	11501.2	NaN	1.21629	NaN	NaN	91503.4	NaN	34520	1.14119	NaN	NaN	NaN	NaN	NaN
O60449	LY75	Lymphocyte antigen 75	LY75_HUMAN	314114688	651537	2822.67	495728896	4490429	502773376	118067	513181312	5884910	2.12822e+06	168107	296732384	1134844928	886009280	1558679552	2.39751e+06	1899782144	16799390	689312	170689	231826368	NaN	210480496	1.57978e+06	527445248	455321312	167865	601186944	2.57592e+06	5487.66	2150459	292303712	105580	2820.47	173089	1.09184e+06	250729024	78943.1	310982464	86992	1011006144	808108	1.99382e+06	74986.7	730705152	6854
O60462	NRP2	Neuropilin-2	NRP2_HUMAN	11892.9	30116.6	37787.7	4463.69	581235	18059.3	20739	9627.98	42630.3	34849.1	33321	65112.9	18239.2	34500.5	26399.7	18778.7	46995.9	29382.4	24923.3	19861.2	70361.8	33428.2	16566.8	13928.5	19116.2	50405.8	113679	38062.1	29044.9	17163.5	19682.9	12618.9	60219.7	20614.3	24528.5	49954.9	13216.2	15791.2	35047.4	30129.8	13648.8	30505.2	16558	35985.9	24733.7	21313.9
O60469	DSCAM	Cell adhesion molecule DSCAM	DSCAM_HUMAN	285001	82328.2	1.16348e+06	107797	1.08325e+06	199605	229162	322630	48811.8	25545.2	66529.8	188264	1555858	116867	1.44345e+06	NaN	639433	673825	258192	213826	280629	209132	143761	308069	207868	490266	2.07157e+06	636628	601143	1.0177e+06	925066	180409	282974	81300.8	78391	50260.2	83648.2	114988	618262	266162	305810	401680	325364	131434	434817	89331.4
O60476	MAN1A2	Mannosyl-oligosaccharide 1,2-alpha-mannosidase IB	MA1A2_HUMAN	NaN	NaN	NaN	NaN	NaN	NaN	NaN	NaN	NaN	NaN	11286.1	NaN	NaN	NaN	NaN	77.8954	NaN	NaN	NaN	NaN	NaN	NaN	NaN	NaN	NaN	22862.2	NaN	NaN	NaN	NaN	NaN	NaN	1.08332	NaN	1.21629	NaN	NaN	NaN	NaN	NaN	NaN	NaN	NaN	1.03556	NaN	NaN
O60494	CUBN	Cubilin	CUBN_HUMAN	56424.3	23863.9	3596.81	4459.61	NaN	9837.27	7404.82	10571	18857	26203.1	3924.3	1.04698	5839.67	72162.4	7968.21	9431.08	4.31492	NaN	NaN	3941.47	1.19808	12907.8	11684	4421.34	NaN	58498.2	1.14763	62712.3	25857.4	6100.89	1.03778	10049.8	50708.4	8262.75	14902.6	16324.6	18365.7	9287.1	21952.9	21402.5	28423.3	43643.2	16125.1	5435.87	1.65535	19385.6
O60507	TPST1	Protein-tyrosine sulfotransferase 1	TPST1_HUMAN	270907	NaN	240047	282011	330528	153374	367119	258520	486848	506363	218473	1.04698	137662	322035	2.075	318230	NaN	238296	365403	277577	NaN	296264	481224	549582	447210	270223	393469	NaN	347926	491710	306373	384865	494058	409462	403843	412375	468230	393255	365998	526640	563616	455106	492199	168917	56060.6	400811
O60548;Q12950;Q12952;Q16676;Q3SYB3;Q5VV16;Q6VB84;Q8WXT5;Q9C009;Q9NU39;Q9UJU5	FOXD2;FOXD4;FOXL1;FOXD1;FOXD4L6;FOXD4L5;FOXD4L3;FOXD4L4;FOXQ1;FOXD4L1;FOXD3	Forkhead box protein D2;Forkhead box protein D4;Forkhead box protein L1;Forkhead box protein D1;Forkhead box protein D4-like 6;Forkhead box protein D4-like 5;Forkhead box protein D4-like 3;Forkhead box protein D4-like 4;Forkhead box protein Q1;Forkhead box protein D4-like 1;Forkhead box protein D3	FOXD2_HUMAN;FOXD4_HUMAN;FOXL1_HUMAN;FOXD1_HUMAN;FX4L6_HUMAN;FX4L5_HUMAN;FX4L3_HUMAN;FX4L4_HUMAN;FOXQ1_HUMAN;FX4L1_HUMAN;FOXD3_HUMAN	1.26764e+06	1.47888e+06	992424	551568	795016	593691	1.08935e+06	733534	332690	1.27857e+06	1.31334e+06	985195	289971	1.58136e+06	573316	1.44091e+06	311281	528174	1.6529e+06	1.30358e+06	230579	1.51106e+06	1.16012e+06	1.0532e+06	1.21911e+06	1.72576e+06	749586	821341	1.68724e+06	740226	844488	590303	1.09446e+06	1.0858e+06	1.19253e+06	1.66342e+06	748120	2468656	1.72667e+06	1.26334e+06	551703	1.23049e+06	1.15912e+06	1.46336e+06	375996	679068
O60551	NMT2	Glycylpeptide N-tetradecanoyltransferase 2	NMT2_HUMAN	NaN	NaN	NaN	NaN	NaN	NaN	NaN	NaN	NaN	NaN	NaN	NaN	NaN	48448.6	NaN	NaN	NaN	NaN	34594.4	NaN	NaN	NaN	NaN	NaN	NaN	NaN	NaN	NaN	NaN	NaN	NaN	NaN	NaN	NaN	NaN	NaN	NaN	NaN	NaN	NaN	NaN	NaN	NaN	NaN	NaN	NaN
O60610	DIAPH1	Protein diaphanous homolog 1	DIAP1_HUMAN	NaN	NaN	NaN	NaN	NaN	NaN	NaN	1.21511	2.70596	1	NaN	NaN	NaN	NaN	NaN	NaN	NaN	NaN	NaN	NaN	NaN	1	NaN	NaN	NaN	NaN	NaN	NaN	NaN	NaN	NaN	NaN	1459.52	NaN	NaN	NaN	NaN	6232.83	NaN	NaN	1.14119	NaN	NaN	25.9716	1947.06	NaN
O60664	PLIN3	Perilipin-3	PLIN3_HUMAN	126479	66624.9	56760.3	92547	12380.7	14802.7	63636.2	55514.7	11058.1	58107.9	23261.9	171678	18488.6	222605	NaN	58370.8	NaN	21067.8	47052.1	60370.5	41574.4	53055.4	76447.9	19039.2	55690.5	134134	87721	5568.69	17010.3	NaN	74977.6	35785.6	22900.8	63738.6	48148.4	61206.3	64324.6	26153.5	131508	64862.1	81549.3	73327.9	40823.6	53076.8	46931.2	19537.6
O60671	RAD1	Cell cycle checkpoint protein RAD1	RAD1_HUMAN	NaN	NaN	NaN	NaN	NaN	NaN	NaN	NaN	NaN	NaN	NaN	NaN	NaN	NaN	NaN	NaN	NaN	NaN	NaN	NaN	60940.5	NaN	NaN	NaN	NaN	NaN	NaN	NaN	NaN	NaN	NaN	NaN	NaN	NaN	NaN	14748.1	11610.2	NaN	NaN	NaN	NaN	NaN	NaN	NaN	7440.13	NaN
O60706	ABCC9	ATP-binding cassette sub-family C member 9	ABCC9_HUMAN	362901	32977.5	28230	47290.4	62353.3	49868.1	64783	55131.5	10251.5	15661.4	148150	35084.4	240372	368748	80306.2	25505	37414.9	NaN	105853	34273.9	53305	30228	31201.3	18584.9	28278.9	425974	42535.6	44983	65285.6	70009.3	17960.3	52191.2	58492.8	57556.6	22882.8	3943.25	66178.5	64916.3	375148	NaN	82365.6	NaN	2421.47	40022.9	47454.3	61528.8
O60814;P57053;P58876;P62807;Q5QNW6;Q93079;Q99877;Q99879;Q99880	H2BC12;H2BC12L;H2BC5;H2BC10;H2BC18;H2BC9;H2BC15;H2BC14;H2BC13	Histone H2B type 1-K;Histone H2B type F-S;Histone H2B type 1-D;Histone H2B type 1-C/E/F/G/I;Histone H2B type 2-F;Histone H2B type 1-H;Histone H2B type 1-N;Histone H2B type 1-M;Histone H2B type 1-L	H2B1K_HUMAN;H2BFS_HUMAN;H2B1D_HUMAN;H2B1C_HUMAN;H2B2F_HUMAN;H2B1H_HUMAN;H2B1N_HUMAN;H2B1M_HUMAN;H2B1L_HUMAN	1093.24	5208.35	152165	619.847	NaN	13737.2	44226.6	23976.9	2.706	13136.5	281.679	3813.64	205.765	10513.8	NaN	4706.9	NaN	NaN	72829	NaN	113618	172385	NaN	439.218	6124.75	11866.3	1.14764	NaN	1.01236e+06	NaN	4342.06	1375.33	3471.1	4692.74	1682.05	5880.94	1572.55	1.18082e+06	1.35088	1	1.14119	114079	1	7789.34	339347	5011.28
O60844	ZG16	Zymogen granule membrane protein 16	ZG16_HUMAN	30476.5	43571.2	62712.7	42902.5	49091.7	84049.7	60350.5	78734.7	107453	11563.9	36334.5	74646.5	70120.2	42885.9	171229	74499.9	111219	95161.9	57815.7	114137	13510.6	61148.9	43762	101642	83942.6	84223.5	121417	99694.9	63279.8	85818.5	39819.7	63561.1	71201.4	98403.3	70697.4	14540.9	159941	18780.1	55637.1	71003.9	77048.3	73497.5	57502.1	84545	74880.1	57543.9
O60858	TRIM13	E3 ubiquitin-protein ligase TRIM13	TRI13_HUMAN	1.39363	1.81311	1	1.30709	32126	1.24128	1	1.21511	3384.17	1	1	1.04698	1.05133	NaN	NaN	1	NaN	1.03068	1	1	7128.25	1	1.04106	NaN	1.27012	1.49744	5824.69	1.6486	1.27138	1	1.03778	1.13404	1.08332	1.23584	1.21629	1.0817	1.07838	7370.45	1.35088	1	1.14119	NaN	1	1.03556	1.65535	1.31997
O60884	DNAJA2	DnaJ homolog subfamily A member 2	DNJA2_HUMAN	NaN	NaN	1	NaN	NaN	NaN	NaN	NaN	NaN	NaN	NaN	NaN	NaN	NaN	NaN	NaN	NaN	NaN	NaN	NaN	NaN	NaN	NaN	NaN	NaN	NaN	NaN	NaN	NaN	NaN	NaN	NaN	NaN	NaN	NaN	NaN	NaN	NaN	NaN	1	NaN	NaN	NaN	1.03556	NaN	1.31997
O60885	BRD4	Bromodomain-containing protein 4	BRD4_HUMAN	1661.69	8645.08	1943.51	NaN	7992.59	NaN	1	8254.09	NaN	5158.49	1613.69	9345.34	2574.84	1.48831	4865.86	6206.24	NaN	NaN	NaN	7192.27	832.235	13678.1	NaN	9181.6	4205.75	NaN	5001.17	4034.92	7727.29	NaN	13940.9	17411.6	1168.01	7875.09	12459.9	16502.7	12156.7	4165.32	7388.75	9496.07	8755.4	NaN	5968.09	3735.8	5053.49	8695.71
O60888	CUTA	Protein CutA	CUTA_HUMAN	NaN	NaN	NaN	32243.1	65684.3	10563.1	8880.93	1.21511	NaN	23432.7	7815.66	17986.2	1.05133	NaN	22794.9	NaN	NaN	42508	12860.9	NaN	NaN	NaN	NaN	NaN	NaN	NaN	NaN	NaN	NaN	NaN	1.03778	5186.51	6832.24	19610.2	8127.77	14098.1	6437.11	8019.45	NaN	1	18141.4	21716.5	NaN	NaN	NaN	33575.3
O60911	CTSV	Cathepsin L2	CATL2_HUMAN	NaN	NaN	NaN	NaN	NaN	NaN	NaN	NaN	NaN	NaN	NaN	NaN	NaN	NaN	NaN	NaN	NaN	NaN	NaN	NaN	NaN	NaN	NaN	NaN	NaN	NaN	NaN	NaN	NaN	NaN	NaN	NaN	NaN	NaN	NaN	NaN	NaN	207177	NaN	NaN	NaN	NaN	NaN	NaN	NaN	NaN
O60941;Q9Y4J8	DTNB;DTNA	Dystrobrevin beta;Dystrobrevin alpha	DTNB_HUMAN;DTNA_HUMAN	62070.2	1.81311	NaN	7725.36	NaN	NaN	23083.3	15856.6	NaN	123.337	3592.29	NaN	NaN	51545.8	NaN	NaN	72598.2	NaN	15617.4	NaN	47990.7	1	NaN	NaN	3935.28	70480.1	16257.3	NaN	18.5001	NaN	7652.15	NaN	24464.7	NaN	207.482	7149.91	NaN	1	NaN	NaN	NaN	NaN	NaN	2.70029	NaN	NaN
O75015	FCGR3B	Low affinity immunoglobulin gamma Fc region receptor III-B	FCG3B_HUMAN	120152	762577	140499	138234	566831	225355	122024	114803	362373	171700	102744	108218	116301	167040	69174.1	196428	423596	241627	231650	155691	111198	270213	207858	249834	168931	80129.4	14220.7	203843	130465	257834	310460	NaN	183809	21496.6	154343	174253	66706.3	205092	95639	187256	125202	141514	151210	1.64341e+06	329867	689216
O75019	LILRA1	Leukocyte immunoglobulin-like receptor subfamily A member 1	LIRA1_HUMAN	NaN	NaN	NaN	33312.2	NaN	152514	NaN	100174	NaN	NaN	72234.1	NaN	NaN	NaN	130291	NaN	285411	NaN	NaN	NaN	191632	51027.2	NaN	NaN	83051.8	173157	NaN	NaN	NaN	NaN	NaN	83281.3	NaN	140908	128600	38571.8	77212.3	NaN	NaN	63329.9	45471.3	367031	NaN	210512	182646	NaN
O75023	LILRB5	Leukocyte immunoglobulin-like receptor subfamily B member 5	LIRB5_HUMAN	65044.7	54933.7	28040.2	13610.5	97005.7	83458.6	63231.4	391830	48560.2	83271.9	97946	30695.8	247308	60373.7	78006.9	28952.2	67769.3	1.03068	37552.5	33341	58616.6	52556.6	36455.4	45644.4	83582.7	66899.3	38432.6	38410.9	521092	39236.1	27221.7	75764.7	558862	53855.1	64159.1	49168.9	27256.6	399503	72548.9	30586.7	576470	74967.4	33181.8	129957	296222	52746.2
O75038	PLCH2	1-phosphatidylinositol 4,5-bisphosphate phosphodiesterase eta-2	PLCH2_HUMAN	NaN	31996.8	NaN	124363	1.24682e+06	40638.7	NaN	112592	NaN	NaN	NaN	NaN	NaN	NaN	NaN	NaN	NaN	NaN	NaN	NaN	NaN	NaN	NaN	NaN	103273	NaN	NaN	NaN	194907	462667	NaN	76542.6	NaN	98995.7	71005.3	69818.7	NaN	NaN	NaN	NaN	NaN	NaN	NaN	NaN	NaN	29733.8
O75051	PLXNA2	Plexin-A2	PLXA2_HUMAN	NaN	NaN	NaN	80956	1.23112	94844.6	NaN	160874	NaN	88688.3	117109	1.04697	NaN	1.48829	NaN	1	242115	21621.9	127997	1	46048.8	1	NaN	98122.9	NaN	69708.3	NaN	26359.7	163355	NaN	208093	1.1338	NaN	233052	151259	134859	184652	90508.8	NaN	243922	NaN	NaN	150584	265820	164398	112317
O75052	NOS1AP	Carboxyl-terminal PDZ ligand of neuronal nitric oxide synthase protein	CAPON_HUMAN	1.39363	13395.2	NaN	1.30709	1.23112	NaN	NaN	1.21511	NaN	4006.61	1	1.04698	5973.53	1.48831	2.07502	NaN	4.31492	32879.1	1	NaN	1.19808	6127.25	NaN	NaN	1.27012	1.49744	3026.93	787.414	1.27138	1	9034.13	NaN	5473.62	NaN	NaN	1.0817	4450.13	1	9020.09	1	1.14119	20326.1	1	NaN	5000.51	6332.49
O75072	FKTN	Ribitol-5-phosphate transferase FKTN	FKTN_HUMAN	NaN	NaN	NaN	11008.5	NaN	92287.3	NaN	NaN	NaN	NaN	NaN	NaN	NaN	NaN	NaN	NaN	NaN	NaN	NaN	NaN	NaN	NaN	NaN	52540.9	NaN	NaN	NaN	NaN	NaN	NaN	NaN	NaN	NaN	NaN	NaN	NaN	NaN	NaN	NaN	NaN	NaN	NaN	NaN	NaN	NaN	62716.7
O75077	ADAM23	Disintegrin and metalloproteinase domain-containing protein 23	ADA23_HUMAN	NaN	NaN	309890	NaN	NaN	NaN	NaN	NaN	360353	NaN	NaN	NaN	NaN	NaN	NaN	1	NaN	NaN	NaN	NaN	2390.04	NaN	NaN	1	1.27012	NaN	NaN	NaN	NaN	NaN	NaN	139400	NaN	NaN	146041	NaN	147798	NaN	NaN	NaN	NaN	NaN	73939.2	NaN	1.65535	NaN
O75083	WDR1	WD repeat-containing protein 1	WDR1_HUMAN	50101.5	140836	30187	213301	141751	351644	13158.2	84454.2	5572.45	45172.2	1057.33	29138.7	4596.02	50506.6	7061.8	7973.31	68152.6	178337	41775.7	7962.37	29692.2	34838.6	1.04106	17442.5	13275.5	55154	18688.9	9895.7	19827.4	11942.4	10587.6	8901.83	164804	5448.82	143358	23010.9	15117.9	21121.2	49208.3	47788.6	131030	104594	8870.32	131428	336077	66920.9
O75084	FZD7	Frizzled-7	FZD7_HUMAN	NaN	18342.3	NaN	NaN	NaN	43351	NaN	NaN	NaN	NaN	60950.1	NaN	NaN	NaN	9040.68	3482.22	NaN	NaN	NaN	NaN	53802.9	NaN	NaN	NaN	NaN	53550.3	NaN	NaN	40109.6	NaN	NaN	NaN	92402.6	NaN	NaN	77579.3	NaN	NaN	NaN	58704.1	NaN	NaN	NaN	NaN	28846.9	NaN
O75093	SLIT1	Slit homolog 1 protein	SLIT1_HUMAN	56170.1	1.26122e+06	430122	NaN	122651	NaN	NaN	NaN	NaN	NaN	NaN	516979	613652	NaN	NaN	925262	449259	979253	372480	NaN	625748	418331	929349	1.06279e+06	NaN	359602	95383	778804	1185005	NaN	1.26593e+06	1.79396e+06	NaN	NaN	NaN	NaN	746595	NaN	279544	NaN	1.70168e+06	203584	836283	NaN	NaN	729343
O75129	ASTN2	Astrotactin-2	ASTN2_HUMAN	32183192	27743000	19803928	26349236	11676957	20911436	23622232	26848754	15368487	26644294	22727444	29175400	29425420	34125472	32973030	24514170	23789858	20433412	21064814	27834548	23018240	23765836	29445904	22660966	29447320	37840036	37141068	27462520	23780348	16791208	28004928	31765156	26461840	26604974	31483084	24887158	24014528	22189740	31631646	22974506	28068962	30116472	24798488	35088884	26898488	27675752
O75131	CPNE3	Copine-3	CPNE3_HUMAN	NaN	2277.69	4527.15	NaN	6328.01	5303.69	6142.43	385605	2.70598	6864.81	NaN	NaN	NaN	15694.4	NaN	NaN	2377.42	NaN	NaN	NaN	NaN	3061.08	2519.28	NaN	NaN	NaN	4076.33	NaN	NaN	NaN	NaN	NaN	2071.8	NaN	3891.95	4825.91	1.07838	250538	14990.2	4874.16	6011.6	NaN	3741.84	15199.5	5281.42	NaN
O75144	ICOSLG	ICOS ligand	ICOSL_HUMAN	444322	343844	347053	395241	317983	407381	273577	674798	603656	422725	293654	344389	164854	469110	421463	368498	541220	311673	346895	288522	273030	344113	397841	352554	422360	510214	394819	2.27482e+06	393290	445454	325848	707974	467523	355975	296551	229928	162617	365282	439471	430884	310362	506294	222181	388329	402052	357599
O75150	RNF40	E3 ubiquitin-protein ligase BRE1B	BRE1B_HUMAN	2.73381e+06	2.13621e+06	4714702	2.11744e+06	NaN	2.78768e+06	2.6331e+06	2.76144e+06	4.79689e+06	1.99308e+06	3.36282e+06	2507376	3.55293e+06	2.99059e+06	5.80033e+06	2517337	692810	NaN	2.19475e+06	2634274	1.12034e+06	2172541	1.42544e+06	2822124	2.54042e+06	2934644	NaN	8269514	4453417	NaN	1.34509e+06	1.53657e+06	3.86443e+06	743090	1.76928e+06	1.50709e+06	1.10891e+06	1971037	2.30426e+06	5.81583e+06	1.73133e+06	2.87118e+06	7944267	2.34216e+06	2628027	1.03816e+06
O75153;Q9Y5I4	CLUH;PCDHAC2	Clustered mitochondria protein homolog;Protocadherin alpha-C2	CLU_HUMAN;PCDC2_HUMAN	NaN	NaN	NaN	NaN	NaN	NaN	NaN	NaN	NaN	NaN	NaN	NaN	NaN	NaN	NaN	NaN	NaN	NaN	NaN	NaN	NaN	537.878	NaN	NaN	NaN	NaN	NaN	NaN	NaN	NaN	NaN	NaN	1.08332	NaN	NaN	NaN	NaN	1	NaN	NaN	NaN	NaN	NaN	NaN	1.65535	1769.72
O75164	KDM4A	Lysine-specific demethylase 4A	KDM4A_HUMAN	NaN	NaN	NaN	NaN	NaN	NaN	NaN	NaN	NaN	1	NaN	NaN	NaN	NaN	NaN	NaN	NaN	NaN	NaN	NaN	NaN	NaN	NaN	NaN	NaN	1.49744	NaN	NaN	NaN	NaN	NaN	NaN	NaN	NaN	NaN	NaN	NaN	NaN	NaN	NaN	1.14119	NaN	NaN	NaN	NaN	NaN
O75192	PEX11A	Peroxisomal membrane protein 11A	PX11A_HUMAN	NaN	NaN	NaN	NaN	NaN	NaN	NaN	1.21511	NaN	NaN	NaN	NaN	7086.41	NaN	NaN	NaN	NaN	NaN	NaN	NaN	NaN	NaN	NaN	NaN	1.27012	NaN	NaN	NaN	NaN	NaN	NaN	NaN	NaN	1.23584	NaN	NaN	1.07838	NaN	NaN	NaN	NaN	NaN	NaN	NaN	NaN	NaN
O75223	GGCT	Gamma-glutamylcyclotransferase	GGCT_HUMAN	33695.3	30313.7	15955.4	14123.9	NaN	22805.8	47116.8	60580.5	NaN	77082.3	30520	11907.3	NaN	45412.9	NaN	7592.75	52029.9	NaN	9764.42	9601.23	50638.7	47017.2	52188.8	NaN	387435	33591.3	37080.4	40586.1	21517.1	1	39514.8	14315.1	344910	22363.8	604827	411534	47534.1	1.11368e+06	34876.4	20151.2	25577.3	384167	44457.9	12651.5	42390.6	181302
O75326	SEMA7A	Semaphorin-7A	SEM7A_HUMAN	63066	16818.7	65333.8	79879.1	NaN	107207	62067	21020.3	20861.7	98817.6	14467.4	29039.1	46590.6	123973	115025	76524	34092.2	1066.85	69046.5	66581.4	116882	82941	15169.9	15753.3	99133.1	22557.2	27611.5	33888.1	10666.7	48808.1	10006.4	70634.7	71180.6	96170.5	91751.9	78139.5	16112.8	70228.8	147122	32629.6	84813.1	27115.3	48272	85530.9	8331.99	107177
O75339	CILP	Cartilage intermediate layer protein 1	CILP1_HUMAN	53451.2	71385.7	25003	35948.2	38644.8	43301.7	34329.3	59895.2	16472.1	58271.4	17662.1	57693.4	61156.4	58940.2	27465.6	37413.2	50121.4	116281	28875.4	47960.9	54768.9	58817.1	25935.4	53033.1	31826.2	60398.9	37784.9	23752.2	14691.9	41163.3	40371.9	22765	1432.15	47391	51023.4	NaN	19885	47000	28344.1	10013.6	37823.1	7945.54	48984.8	37465.4	150095	55623.5
O75340	PDCD6	Programmed cell death protein 6	PDCD6_HUMAN	25948.5	103533	60327	41709.1	49073.9	45776.8	71627	39542.2	93218.9	61555.8	30896.4	44995.8	30324.7	91544.7	34531.1	49888.9	NaN	68083.8	58764.8	43938.8	149608	53639.2	32942.4	41757.7	78696.9	68217	77671.9	NaN	63053.1	34160.4	48330.8	20597.6	52767.3	51521.9	58549.2	57228.4	45599.2	61458.2	73299.4	55471.6	38015.9	68269.8	73773.7	67779.4	35851.9	37839.2
O75342	ALOX12B	Arachidonate 12-lipoxygenase, 12R-type	LX12B_HUMAN	NaN	NaN	NaN	NaN	NaN	NaN	NaN	18056.9	NaN	NaN	NaN	NaN	NaN	NaN	NaN	NaN	NaN	NaN	NaN	NaN	NaN	NaN	NaN	NaN	NaN	NaN	NaN	NaN	NaN	NaN	NaN	NaN	NaN	NaN	NaN	NaN	NaN	71308.7	NaN	NaN	NaN	NaN	NaN	NaN	NaN	NaN
O75347	TBCA	Tubulin-specific chaperone A	TBCA_HUMAN	30747.8	1.81311	5394.51	86362.7	6274.17	75276.2	39615.9	19126.2	NaN	25086.3	NaN	26282.5	27032210	22066118	NaN	21981.8	NaN	10888.9	56933.3	55635.6	13429390	18614.9	NaN	NaN	28445.1	24620790	3865.95	120074	96989.3	16909.5	33394.4	NaN	1.08332	NaN	17428	4493.41	64491.1	21637.8	27912.6	9810.86	31986.8	27376.4	47663.2	24111.2	8277.9	16943.9
O75351	VPS4B	Vacuolar protein sorting-associated protein 4B	VPS4B_HUMAN	NaN	NaN	NaN	NaN	NaN	NaN	NaN	NaN	NaN	NaN	NaN	NaN	1.05133	NaN	NaN	NaN	NaN	NaN	NaN	NaN	NaN	1	NaN	NaN	NaN	NaN	NaN	NaN	NaN	NaN	NaN	NaN	NaN	NaN	NaN	NaN	NaN	NaN	NaN	NaN	NaN	NaN	NaN	NaN	NaN	NaN
O75356	ENTPD5	Nucleoside diphosphate phosphatase ENTPD5	ENTP5_HUMAN	111605	86173.2	44674.7	41851.1	14278.9	102022	69535.7	14321.2	63283.8	71458.5	64849.9	96914.5	43934.8	NaN	90806.4	45175.7	147794	18418.6	50186.2	65041.3	70088.9	55621.2	68460.1	79802.6	69130.6	86753.5	75404.3	89410.2	116264	87648.1	58550.8	54983.3	72001.5	69027.2	57033.9	47070.8	47763.7	85797.5	83378.5	36603.2	84460.5	59010.6	25036.5	47715.6	40394	68605.3
O75367	MACROH2A1	Core histone macro-H2A.1	H2AY_HUMAN	NaN	NaN	NaN	NaN	NaN	NaN	NaN	NaN	NaN	5061.96	NaN	NaN	NaN	NaN	NaN	NaN	NaN	NaN	NaN	NaN	NaN	NaN	NaN	NaN	NaN	NaN	NaN	NaN	65544.6	NaN	NaN	NaN	NaN	NaN	NaN	NaN	NaN	36064.4	NaN	NaN	NaN	NaN	NaN	NaN	NaN	NaN
O75368	SH3BGRL	Adapter SH3BGRL	SH3L1_HUMAN	48223.8	33018.7	29351.5	116956	28798.6	172132	54900.9	51535.7	16083.9	35535.8	13349.4	35362.5	10164.6	60866.5	21979.1	16843.4	63178.1	21083.8	32783.6	14066.3	24833.2	44290	12196.7	11521.2	28864.6	44385.8	3372.64	56857.6	46885.6	16047.5	73767.9	29977.1	32113	10138	75437.1	15579.6	124241	16908.6	26106.1	36078.8	68798.1	49452.5	57373.7	53793.1	99032.8	55506.9
O75369	FLNB	Filamin-B	FLNB_HUMAN	1.39363	42496.4	3171.62	79294.2	49254.6	77274.2	NaN	23600.7	2.70596	52402.7	123212	224.082	83465.3	94710.2	114089	89635	94298.3	NaN	69035.4	70232.3	34241.3	17746.3	187833	118173	166224	NaN	37169.9	316181	56664.7	1	54115.9	15390.8	139803	66918.5	45101.8	131060	134302	1	24993.2	163927	269684	123882	1	132333	18222.9	123064
O75390	CS	Citrate synthase, mitochondrial	CISY_HUMAN	148758	492211	160482	356711	53031	321816	281224	398653	404320	155473	229947	118086	31008.8	532487	260510	415465	NaN	NaN	342212	353145	311817	385258	225271	301411	582749	501051	319832	257474	230358	146981	259693	175342	237197	394257	496842	291429	375502	380329	285110	266964	258083	262326	290638	442931	357372	270227
O75396	SEC22B	Vesicle-trafficking protein SEC22b	SC22B_HUMAN	NaN	NaN	NaN	NaN	NaN	NaN	NaN	NaN	NaN	NaN	NaN	NaN	NaN	NaN	NaN	NaN	NaN	NaN	NaN	NaN	NaN	NaN	NaN	NaN	NaN	NaN	NaN	NaN	NaN	NaN	NaN	NaN	NaN	NaN	NaN	NaN	NaN	NaN	NaN	NaN	NaN	NaN	NaN	NaN	NaN	NaN
O75400	PRPF40A	Pre-mRNA-processing factor 40 homolog A	PR40A_HUMAN	NaN	63092.3	NaN	NaN	150872	NaN	NaN	NaN	NaN	NaN	NaN	1.04697	NaN	NaN	NaN	NaN	NaN	NaN	NaN	1437.67	NaN	NaN	NaN	NaN	NaN	NaN	NaN	NaN	17662.6	NaN	NaN	NaN	NaN	NaN	NaN	185958	NaN	3855.56	157655	NaN	NaN	NaN	NaN	2549.75	NaN	NaN
O75417	POLQ	DNA polymerase theta	DPOLQ_HUMAN	123696	NaN	NaN	NaN	63559.1	NaN	149757	NaN	NaN	NaN	NaN	NaN	NaN	NaN	NaN	NaN	NaN	NaN	NaN	53429.2	501032	NaN	NaN	NaN	NaN	NaN	NaN	NaN	NaN	NaN	NaN	NaN	NaN	NaN	NaN	NaN	NaN	NaN	NaN	117851	NaN	NaN	44367.1	NaN	NaN	NaN
O75420	GIGYF1	GRB10-interacting GYF protein 1	GGYF1_HUMAN	1.43561e+06	970554	211570	859582	19319.4	502806	577964	439087	88681.3	862605	616183	1.64967e+06	820323	861798	1.43183e+06	586191	1418147	46829.3	577815	238448	722522	411160	848326	413685	969923	1.43425e+06	864050	934953	683039	36911.2	369251	698574	291623	676588	660387	441433	722744	491473	1.19683e+06	224177	356169	821610	167325	467797	633148	814502
O75436	VPS26A	Vacuolar protein sorting-associated protein 26A	VP26A_HUMAN	NaN	NaN	NaN	NaN	NaN	NaN	NaN	3860.78	NaN	NaN	NaN	NaN	NaN	NaN	NaN	NaN	NaN	NaN	NaN	NaN	NaN	NaN	NaN	NaN	NaN	NaN	NaN	NaN	NaN	NaN	NaN	NaN	NaN	NaN	NaN	NaN	NaN	2921.13	NaN	NaN	NaN	NaN	NaN	NaN	NaN	3474.85
O75439	PMPCB	Mitochondrial-processing peptidase subunit beta	MPPB_HUMAN	168547	224244	82933.5	129035	1.23112	65501.7	47942.1	124619	348040	42095.1	80839.4	60637.5	70561.1	211946	118745	82966.5	76464.1	NaN	23533.8	73365.1	125419	97833.2	88875	59374	128625	169895	82249.2	86862	73470.9	24214.1	75431.8	59692.6	87053.6	57693.9	162387	137743	119486	76257.1	191129	113431	34629.5	165356	61141.4	112218	104694	144379
O75443	TECTA	Alpha-tectorin	TECTA_HUMAN	319715	NaN	NaN	8596.56	NaN	47867.9	NaN	38173.2	NaN	22510	NaN	NaN	NaN	220828	NaN	NaN	68485.2	NaN	NaN	22845.6	50843.4	NaN	52339.2	1	NaN	NaN	NaN	93113.4	43101	NaN	47773.9	37502.9	53226.4	56371.1	1.21629	1.0817	NaN	NaN	62870	NaN	NaN	57072.5	24202.8	32547.6	NaN	NaN
O75445	USH2A	Usherin	USH2A_HUMAN	118469	17755	60699.5	15044	14228.5	25588.3	12102.2	91482.9	NaN	3085.1	34534.3	3736.84	313048	299736	143267	NaN	62463.8	1.03068	86404.8	48698	5619.55	27124.7	22246.2	132709	12715	279988	41466.4	111114	43510.6	23741.5	65104.2	13917.3	40227.3	20592.2	6150.46	NaN	34516.8	47358.7	167545	30707.3	111557	NaN	NaN	30017.6	50168.1	28296.8
O75503	CLN5	Ceroid-lipofuscinosis neuronal protein 5	CLN5_HUMAN	39098.4	29004.1	16069	17476.4	NaN	18252	21866.7	30341.5	NaN	20470.2	9659.35	71459.9	18434.9	42088.7	NaN	24685.8	NaN	NaN	43394.7	40571	23048.5	17245.7	22858.2	33689.9	39779.9	27253.9	18090.2	40402.8	29755.3	15992.3	27515.6	16800.5	35604.1	27992.2	19636.3	39227.4	2558.64	21436.3	44799.8	25342.7	21014.1	41174.8	15962.4	21693.5	27076.5	17259.5
O75509	TNFRSF21	Tumor necrosis factor receptor superfamily member 21	TNR21_HUMAN	11225.5	1.81311	125610	19698.9	NaN	63381.2	193732	7725.37	NaN	26860.9	17051	15275.5	11471.5	6140.09	20170.5	NaN	NaN	1.03068	16344.8	NaN	34573.5	15080.1	1526.48	25633.4	13229.7	9869.91	3467.61	17207.4	4709.38	NaN	9968.26	6515.47	37492.9	6264.34	13123.6	4054.42	13459.8	14010.1	8410.99	1	22371.2	10137.2	29606.3	14739.2	7445.29	28538.9
O75529	TAF5L	TAF5-like RNA polymerase II p300/CBP-associated factor-associated factor 65 kDa subunit 5L	TAF5L_HUMAN	1.39363	NaN	NaN	1.30707	NaN	NaN	1	NaN	NaN	NaN	NaN	NaN	NaN	248.216	NaN	NaN	NaN	NaN	NaN	NaN	NaN	NaN	NaN	NaN	NaN	1.49742	1.14764	1.6486	NaN	NaN	1.03778	NaN	1.08332	NaN	NaN	NaN	NaN	495.06	NaN	NaN	1.14119	2358.38	NaN	1720.12	8926.71	NaN
O75556	SCGB2A1	Mammaglobin-B	SG2A1_HUMAN	23057.2	1.81311	NaN	29218.2	NaN	NaN	NaN	209461	NaN	NaN	NaN	NaN	NaN	NaN	NaN	NaN	NaN	NaN	NaN	NaN	NaN	NaN	NaN	NaN	1295.28	NaN	NaN	16306.7	NaN	NaN	NaN	NaN	NaN	NaN	NaN	NaN	24419.2	NaN	NaN	NaN	NaN	NaN	NaN	NaN	NaN	NaN
O75558	STX11	Syntaxin-11	STX11_HUMAN	NaN	NaN	NaN	NaN	NaN	1764.1	NaN	NaN	NaN	NaN	NaN	NaN	NaN	NaN	NaN	NaN	NaN	NaN	NaN	NaN	NaN	NaN	NaN	NaN	NaN	NaN	NaN	NaN	NaN	NaN	NaN	NaN	NaN	NaN	NaN	NaN	NaN	NaN	NaN	192807	NaN	NaN	NaN	1.03556	NaN	NaN
O75563	SKAP2	Src kinase-associated phosphoprotein 2	SKAP2_HUMAN	NaN	NaN	NaN	NaN	NaN	NaN	NaN	NaN	NaN	NaN	NaN	NaN	NaN	NaN	NaN	NaN	NaN	NaN	NaN	NaN	NaN	NaN	NaN	NaN	NaN	NaN	NaN	NaN	NaN	NaN	NaN	NaN	NaN	NaN	NaN	NaN	NaN	NaN	NaN	NaN	NaN	NaN	NaN	NaN	NaN	NaN
O75581	LRP6	Low-density lipoprotein receptor-related protein 6	LRP6_HUMAN	NaN	NaN	39998.7	NaN	NaN	NaN	NaN	NaN	NaN	NaN	NaN	1.04697	NaN	NaN	NaN	NaN	NaN	NaN	NaN	30635.5	36024.4	NaN	NaN	NaN	NaN	NaN	57225.2	NaN	NaN	NaN	NaN	NaN	38560.3	15268.4	NaN	NaN	NaN	NaN	NaN	3275.93	19944.9	1.61184	NaN	4137.38	NaN	NaN
O75592	MYCBP2	E3 ubiquitin-protein ligase MYCBP2	MYCB2_HUMAN	NaN	NaN	NaN	295540	NaN	150482	NaN	155415	NaN	49150.3	12015.5	136266	634390	1308241	972449	430580	108175	NaN	17582.7	NaN	224776	NaN	NaN	NaN	325192	649986	47026.3	25279.8	536488	NaN	6701.66	383200	NaN	128227	NaN	NaN	16908.3	9999.25	NaN	NaN	4777418	NaN	NaN	9655.25	NaN	NaN
O75594	PGLYRP1	Peptidoglycan recognition protein 1	PGRP1_HUMAN	166931	120187	137998	142080	110698	108404	135912	200315	122621	112086	121598	242653	205935	153774	164553	92830.9	307769	253905	195063	107104	99381.1	156536	132104	86205.7	184394	209489	111566	203113	266621	103864	120023	103531	117580	246381	152556	195989	196818	174051	139524	84460.5	184229	208986	157606	1808443	201709	152826
O75608	LYPLA1	Acyl-protein thioesterase 1	LYPA1_HUMAN	NaN	NaN	NaN	NaN	NaN	70007.1	14554.5	30272.4	NaN	NaN	NaN	NaN	10304.1	NaN	13514.4	26719.8	NaN	NaN	NaN	NaN	1.19808	NaN	24227.2	25890.9	NaN	NaN	15077	NaN	NaN	NaN	NaN	NaN	NaN	29276.5	21339.3	NaN	NaN	529995	NaN	22996	NaN	53212.9	NaN	NaN	29923.1	27560.5
O75629	CREG1	Protein CREG1	CREG1_HUMAN	NaN	NaN	NaN	NaN	NaN	17025.5	NaN	5242.99	NaN	NaN	NaN	8464.11	NaN	NaN	NaN	NaN	NaN	NaN	NaN	NaN	NaN	NaN	NaN	NaN	NaN	NaN	NaN	NaN	NaN	NaN	NaN	NaN	NaN	NaN	NaN	NaN	NaN	13425	NaN	NaN	NaN	NaN	3832.16	NaN	NaN	NaN
O75636	FCN3	Ficolin-3	FCN3_HUMAN	30023976	32004390	17127388	35702344	13620883	22554768	21192908	28585860	18891964	21491980	14887021	18424356	16962000	29036988	26237814	17448070	23581126	15754402	18789104	11236170	22062112	19861286	20356422	27998348	14577650	30986408	14137517	28890956	27027002	23049662	20506426	27812818	22690684	30215792	20867992	13590081	14854140	25596948	30648392	27164358	19319318	28354638	24365914	33749076	22123266	20492566
O75683	SURF6	Surfeit locus protein 6	SURF6_HUMAN	270330	316972	144355	NaN	NaN	239117	146068	261604	81678.6	251799	185932	290687	265191	295725	NaN	203357	366740	NaN	NaN	60615.7	313114	194648	140451	NaN	180200	NaN	NaN	275695	334026	NaN	NaN	37318	NaN	211220	284288	NaN	78955	108104	243101	NaN	268691	213343	NaN	462824	345491	273154
O75695	RP2	Protein XRP2	XRP2_HUMAN	NaN	NaN	NaN	NaN	NaN	NaN	NaN	NaN	NaN	NaN	NaN	NaN	NaN	NaN	NaN	NaN	NaN	NaN	NaN	NaN	NaN	NaN	NaN	NaN	NaN	NaN	NaN	NaN	NaN	NaN	NaN	NaN	NaN	NaN	NaN	NaN	NaN	NaN	NaN	NaN	NaN	NaN	NaN	NaN	NaN	NaN
O75711	SCRG1	Scrapie-responsive protein 1	SCRG1_HUMAN	NaN	NaN	1	1.30709	NaN	1.00416	NaN	1.21511	NaN	NaN	NaN	NaN	NaN	NaN	NaN	1	NaN	NaN	NaN	NaN	NaN	NaN	NaN	NaN	1.27012	NaN	NaN	NaN	NaN	NaN	NaN	NaN	NaN	1.23584	NaN	NaN	NaN	NaN	1.35088	NaN	NaN	NaN	1	1.03556	NaN	4943.56
O75791	GRAP2	GRB2-related adapter protein 2	GRAP2_HUMAN	NaN	NaN	NaN	NaN	NaN	NaN	NaN	NaN	NaN	NaN	NaN	NaN	NaN	NaN	NaN	NaN	NaN	NaN	NaN	NaN	NaN	NaN	NaN	NaN	NaN	NaN	NaN	NaN	NaN	NaN	NaN	NaN	1015.54	NaN	NaN	NaN	NaN	NaN	NaN	NaN	NaN	NaN	NaN	1213.64	2493.36	NaN
O75794	CDC123	Cell division cycle protein 123 homolog	CD123_HUMAN	NaN	NaN	1	1.30707	NaN	NaN	NaN	NaN	NaN	NaN	NaN	NaN	NaN	NaN	NaN	NaN	NaN	NaN	NaN	NaN	NaN	NaN	8541.28	1	NaN	1.49742	NaN	NaN	1.27139	NaN	77.6719	NaN	NaN	NaN	NaN	NaN	NaN	1280.16	NaN	NaN	NaN	NaN	NaN	970.097	NaN	NaN
O75821	EIF3G	Eukaryotic translation initiation factor 3 subunit G	EIF3G_HUMAN	375302	381901	237991	500036	192160	226607	205014	661369	535056	424822	323025	515418	252402	178635	460216	410421	739578	217103	226859	233402	114591	319033	327662	234789	501348	316100	401600	660821	535335	397150	347712	579051	372195	438886	132542	254375	385969	402662	319268	401570	583578	17066.9	378010	607464	337016	505254
O75829	CNMD	Leukocyte cell-derived chemotaxin 1	CNMD_HUMAN	NaN	NaN	NaN	NaN	NaN	NaN	NaN	NaN	NaN	NaN	NaN	NaN	NaN	NaN	NaN	NaN	NaN	NaN	NaN	NaN	NaN	NaN	NaN	NaN	NaN	NaN	NaN	NaN	NaN	NaN	NaN	NaN	NaN	NaN	NaN	NaN	NaN	NaN	NaN	NaN	NaN	NaN	NaN	NaN	NaN	NaN
O75832	PSMD10	26S proteasome non-ATPase regulatory subunit 10	PSD10_HUMAN	NaN	NaN	NaN	NaN	1.23112	NaN	16824.7	NaN	NaN	NaN	NaN	1439.12	1.05133	NaN	NaN	1	NaN	1.03068	NaN	1	NaN	NaN	NaN	NaN	NaN	NaN	71499.1	NaN	12019	NaN	61470	39318	1.08332	53861.1	NaN	NaN	41693.2	13502.2	33726.6	31557.6	NaN	NaN	NaN	2147.11	NaN	NaN
O75874	IDH1	Isocitrate dehydrogenase [NADP] cytoplasmic	IDHC_HUMAN	36460	16708	23668.3	4497.38	10023.7	9682.26	20309.7	NaN	33177.8	20545.7	46770.5	159982	18457	63596	155172	2311.86	NaN	17229.7	31233	755.838	53726.4	27634.3	5594.95	19937.8	45512.4	53173.8	14039.9	2580.14	1.27138	17138.3	1993.87	27685.3	42385.6	17243	11711.5	16382.5	5986.48	42406.8	45262.6	32402.5	17626.4	30538	3719.64	7068.57	16378.7	9066.47
O75882	ATRN	Attractin	ATRN_HUMAN	17270980	14816934	9819626	17450902	8.3652e+06	14949367	11603897	15119444	6.39093e+06	11622968	14231839	16453576	9879684	20288828	25619034	12421942	41782380	11353450	14741377	14135226	13015328	14244015	14433444	13732036	16526659	23256056	13197558	22921890	19281428	12311881	10593942	13816156	11072647	17700584	20013420	15700306	11938358	10720509	17855562	13200539	14431015	24216240	9888775	12506992	19309952	17333852
O75928	PIAS2	E3 SUMO-protein ligase PIAS2	PIAS2_HUMAN	1.39363	1.70949	1	2427.87	NaN	1.24128	NaN	NaN	295.117	13848.1	NaN	NaN	1.05133	13161.9	3687.85	1	8011.32	NaN	NaN	642.665	1391.89	1868.35	NaN	NaN	3491.43	2472.34	742.81	NaN	1.27139	NaN	NaN	NaN	NaN	NaN	NaN	3195.98	1.07838	1	NaN	NaN	1.14119	NaN	NaN	1178.01	1.65533	837.297
O75976	CPD	Carboxypeptidase D	CBPD_HUMAN	25322.1	6744.59	7552.76	10305.6	12194.1	1839.64	12280.6	13207.1	9886.06	7180.27	4396.04	14659.4	7551.03	7979.28	13137.2	13193.2	6303.19	26146.3	8522.77	12349.1	36960.5	11240.8	6795.95	8026.53	8545.19	13867.7	15395.1	10617	12796.6	8798.95	5792.79	18624.1	10430.6	12963.6	8806.14	9036.08	9823.71	9004.33	8293.32	4134.12	10152.5	14585.9	1995.23	14395.1	10383.4	10502.5
O76003	GLRX3	Glutaredoxin-3	GLRX3_HUMAN	32498.3	21992.8	20252.3	12132.7	NaN	21714.8	6435.57	24115.6	14967.5	17411.3	19014.3	15509.8	17008.8	25411.4	24844.6	21030	40748.3	NaN	25359.9	12961.5	32535.3	29856.4	30579	15503	17461.5	26662	19514.6	17595.5	13113.4	NaN	10725.7	16544.1	12668.1	20535.6	9903.55	21871.3	22187.1	7603.12	24025.8	28240.7	8894.2	14611.5	16198.2	59290.4	26614.3	16073.8
O76011	KRT34	Keratin, type I cuticular Ha4	KRT34_HUMAN	NaN	NaN	NaN	NaN	NaN	NaN	NaN	5163.81	NaN	NaN	NaN	NaN	NaN	NaN	NaN	NaN	NaN	NaN	NaN	NaN	NaN	NaN	NaN	NaN	NaN	NaN	NaN	NaN	NaN	NaN	NaN	NaN	NaN	NaN	NaN	NaN	NaN	NaN	NaN	NaN	NaN	NaN	NaN	NaN	NaN	NaN
O76013	KRT36	Keratin, type I cuticular Ha6	KRT36_HUMAN	NaN	NaN	NaN	17722.8	NaN	34462.1	22173.2	NaN	NaN	NaN	NaN	NaN	8291.25	NaN	NaN	20469.8	8314.55	NaN	NaN	NaN	11283.9	NaN	NaN	NaN	NaN	NaN	NaN	NaN	NaN	NaN	NaN	20002.8	NaN	NaN	8377.22	9385.7	15126.7	NaN	NaN	NaN	NaN	NaN	NaN	16786.4	NaN	NaN
O76038	SCGN	Secretagogin	SEGN_HUMAN	NaN	NaN	NaN	NaN	NaN	NaN	NaN	NaN	NaN	NaN	NaN	NaN	NaN	NaN	NaN	NaN	NaN	NaN	NaN	NaN	NaN	NaN	NaN	NaN	NaN	NaN	NaN	NaN	NaN	NaN	NaN	1.13404	NaN	NaN	NaN	NaN	NaN	NaN	NaN	NaN	NaN	NaN	NaN	NaN	NaN	NaN
O76061	STC2	Stanniocalcin-2	STC2_HUMAN	NaN	NaN	NaN	NaN	NaN	NaN	NaN	NaN	NaN	NaN	NaN	NaN	NaN	NaN	NaN	NaN	NaN	NaN	NaN	NaN	NaN	NaN	NaN	NaN	NaN	NaN	NaN	NaN	118963	NaN	NaN	83290.5	98270.1	NaN	111219	149117	NaN	NaN	NaN	NaN	NaN	NaN	NaN	NaN	NaN	NaN
O76076	CCN5	CCN family member 5	CCN5_HUMAN	NaN	NaN	41888.6	NaN	25743.8	NaN	24497.3	NaN	89903.2	NaN	43030.6	NaN	NaN	NaN	NaN	31674.1	NaN	NaN	9473.81	7666.42	NaN	51670.7	30711.4	12233.4	NaN	NaN	NaN	NaN	NaN	35108.4	NaN	NaN	10011.9	NaN	NaN	NaN	34812.6	NaN	NaN	31590.8	NaN	NaN	70238.1	59542.4	NaN	NaN
O76083	PDE9A	High affinity cGMP-specific 3',5'-cyclic phosphodiesterase 9A	PDE9A_HUMAN	NaN	NaN	NaN	NaN	NaN	NaN	29270.1	NaN	NaN	NaN	NaN	NaN	NaN	NaN	NaN	NaN	19115.4	1.03068	NaN	NaN	NaN	NaN	NaN	NaN	NaN	NaN	NaN	NaN	NaN	NaN	NaN	1.13404	NaN	NaN	NaN	14976.7	NaN	NaN	NaN	8685.29	NaN	NaN	NaN	NaN	NaN	NaN
O76096	CST7	Cystatin-F	CYTF_HUMAN	6424.9	NaN	NaN	NaN	NaN	NaN	NaN	NaN	NaN	NaN	NaN	NaN	NaN	NaN	NaN	NaN	NaN	NaN	NaN	NaN	NaN	NaN	NaN	NaN	NaN	NaN	NaN	NaN	NaN	NaN	NaN	NaN	NaN	NaN	NaN	NaN	NaN	NaN	NaN	NaN	NaN	NaN	NaN	11192.4	NaN	NaN
O94760	DDAH1	N(G),N(G)-dimethylarginine dimethylaminohydrolase 1	DDAH1_HUMAN	NaN	NaN	NaN	NaN	NaN	NaN	NaN	NaN	NaN	NaN	NaN	NaN	NaN	NaN	NaN	NaN	NaN	NaN	NaN	NaN	NaN	NaN	NaN	NaN	NaN	NaN	NaN	NaN	NaN	NaN	NaN	NaN	NaN	NaN	NaN	NaN	NaN	NaN	NaN	NaN	NaN	NaN	NaN	NaN	NaN	1.31997
O94766	B3GAT3	Galactosylgalactosylxylosylprotein 3-beta-glucuronosyltransferase 3	B3GA3_HUMAN	3.51064e+06	531885	1.64926e+06	656987	5.21682e+06	688031	1385641	778043	133761	1.31384e+06	3.17081e+06	1.05414e+06	7.3602e+06	2090833	687093	1.11776e+06	672076	2.33446e+06	1.32319e+06	889872	806694	425346	486718	1.5017e+06	585456	4.04042e+06	468912	687307	982241	1.54092e+06	495275	848404	1.03206e+06	871746	454395	467929	1.25405e+06	1424391	3.65486e+06	NaN	1.40676e+06	NaN	240480	797567	704178	732035
O94769	ECM2	Extracellular matrix protein 2	ECM2_HUMAN	1.39363	39192.1	2897.14	4866.06	7486.98	NaN	4185.37	29847.6	54554.9	1	7741.57	NaN	NaN	1.4883	2.07502	NaN	NaN	15388	NaN	NaN	4154.81	3036.92	2092.52	1503.17	NaN	NaN	NaN	NaN	563.809	3547.05	6005.68	NaN	NaN	NaN	3508.88	NaN	NaN	6662.6	NaN	NaN	NaN	NaN	1	8089.45	NaN	NaN
O94850	DDN	Dendrin	DEND_HUMAN	134124	159654	140496	97890.5	68429.1	131499	82467	221087	73935.9	126424	270455	118389	170429	142875	113838	106538	23369.3	145442	71163.1	168392	147263	88140.2	101060	137468	66948.9	106074	62711.7	87250.2	141333	47932.3	165608	107310	77532.3	195550	126406	26694.2	103845	163278	167668	66749.1	191887	8487.9	182842	161452	191302	206688
O94851	MICAL2	[F-actin]-monooxygenase MICAL2	MICA2_HUMAN	1.39363	87389.8	55895.9	NaN	37058.4	38249.6	5064.29	NaN	220124	11277.5	NaN	4533.64	NaN	NaN	28651.9	NaN	1.04831e+06	1.03068	NaN	8326.83	120525	13724.6	44574.7	28324.9	145000	1.49744	72584.1	200484	76586.7	6542.84	NaN	NaN	23368.4	75868	52799.2	33873.4	66170.9	40143.4	1.35088	12195.1	33311.5	83660.2	42958.2	38566.6	NaN	50917.2
O94856	NFASC	Neurofascin	NFASC_HUMAN	NaN	NaN	1	2.33517	NaN	6279.69	NaN	NaN	NaN	3542.58	NaN	3452.16	NaN	NaN	NaN	NaN	NaN	1.03068	NaN	1	3260.7	NaN	NaN	NaN	NaN	NaN	NaN	NaN	NaN	NaN	NaN	5711.06	NaN	NaN	NaN	NaN	NaN	NaN	NaN	NaN	NaN	NaN	NaN	1.03556	NaN	NaN
O94868	FCHSD2	F-BAR and double SH3 domains protein 2	FCSD2_HUMAN	78706.9	34951.3	38919.8	76902.2	42364.1	NaN	NaN	45599.7	NaN	81860.5	123539	58328.9	56573.3	NaN	NaN	NaN	34247.8	NaN	48098	68077.4	63811.4	52684.9	79349	66367.7	64325.3	86241.8	91950.9	116221	NaN	45432.4	40585.4	36412.2	67418.6	57039.1	46977	49099.3	73145.8	50743.7	NaN	NaN	NaN	75421.4	36121.7	66681.1	NaN	41474.5
O94875	SORBS2	Sorbin and SH3 domain-containing protein 2	SRBS2_HUMAN	NaN	36581.1	101423	NaN	64603.3	45832.7	67698.7	102326	NaN	NaN	NaN	136438	NaN	NaN	39317.3	243525	40734.4	NaN	133565	100872	113669	136213	115360	56747.3	65854.3	170051	108963	97369	110535	NaN	NaN	116315	154035	138929	78816.2	263178	78238.6	NaN	194454	149912	NaN	106586	NaN	NaN	64991.4	96282.2
O94919	ENDOD1	Endonuclease domain-containing 1 protein	ENDD1_HUMAN	16303.8	54622.6	18582.4	1.30709	5817.65	57540.1	1	13457.9	NaN	NaN	30065.1	12949	NaN	NaN	NaN	NaN	38782.4	NaN	NaN	NaN	NaN	13472.7	NaN	13442.8	NaN	17204.6	NaN	NaN	NaN	NaN	7896.61	NaN	1.08332	29980.5	19591.9	NaN	NaN	23599.9	31999.4	28254.8	21641	24609.3	20477.1	8250.22	48965.2	16048.8
O94933	SLITRK3	SLIT and NTRK-like protein 3	SLIK3_HUMAN	NaN	NaN	NaN	NaN	NaN	NaN	NaN	NaN	2.70596	NaN	NaN	NaN	6334.22	NaN	NaN	NaN	NaN	NaN	2058.62	NaN	NaN	3127.43	NaN	NaN	NaN	NaN	NaN	NaN	NaN	NaN	7889.93	NaN	NaN	NaN	NaN	NaN	NaN	NaN	NaN	2958.46	NaN	NaN	NaN	NaN	NaN	NaN
O94955	RHOBTB3	Rho-related BTB domain-containing protein 3	RHBT3_HUMAN	1.39363	16201	NaN	1.30707	NaN	1.24128	1	NaN	32501.3	1	1	NaN	15666.8	1.4883	2.07499	1	35874	1.03068	1	1	10563.6	1	NaN	964.453	1.27012	NaN	1.14764	1.6486	NaN	1	1.03778	1.13403	8114.21	1.23584	1.21631	NaN	1.07838	1	1.35086	23999.6	NaN	1.61184	1	1.03556	7774.64	1.31998
O94967	WDR47	WD repeat-containing protein 47	WDR47_HUMAN	NaN	NaN	NaN	94538.2	NaN	NaN	149717	1.21511	NaN	NaN	4765.58	NaN	NaN	NaN	NaN	120062	NaN	NaN	42390	35083.8	1.19808	32867.2	NaN	NaN	1.27012	36472.4	NaN	NaN	31706.8	6178.62	1.03778	NaN	11098.6	1.23583	21985.5	92610	NaN	NaN	NaN	23973.5	NaN	NaN	NaN	NaN	NaN	13706.9
O94985	CLSTN1	Calsyntenin-1	CSTN1_HUMAN	32093.9	45933.1	39370.7	28924	45120.6	36723	25061.9	49827.9	38056.5	45862.1	54484.4	25326.8	18948	56861.2	23697.4	29287.9	4.31492	52562.7	31766.7	46474	38823.8	34511.2	43700.1	56621.3	40814.2	53634.4	43121.1	15193.6	38520.5	35076.6	49925.9	30009.6	58681.3	38744.5	64721.9	29502	25329.9	45962.4	65927.9	41837.1	50738.5	15825	20863.8	18318.8	40041.5	35308
O95071	UBR5	E3 ubiquitin-protein ligase UBR5	UBR5_HUMAN	NaN	1.81311	7950.89	9329.18	NaN	12502.6	8068.63	NaN	NaN	NaN	NaN	NaN	NaN	1.4883	NaN	1	NaN	NaN	19871	NaN	7660.51	NaN	NaN	25849.9	NaN	70069.1	NaN	NaN	7205.78	NaN	7529.49	NaN	17616.3	NaN	NaN	7791.4	NaN	NaN	63679.2	2327.9	30420.6	NaN	1	12026.6	9847.36	16837.9
O95072	REC8	Meiotic recombination protein REC8 homolog	REC8_HUMAN	19731186	5286913	2.39865e+06	3188660	1158001	2.59682e+06	2.25195e+06	3.82885e+06	1.59311e+06	3.61942e+06	5.75844e+06	2.5945e+06	2.80059e+06	20512872	4253483	2.3759e+06	4663831	563333	2.72642e+06	2.4758e+06	2.75323e+06	2.82937e+06	3142702	1.93039e+06	3.14988e+06	20677732	4957944	14257848	5245615	1.04406e+06	3788446	2.59658e+06	5.84739e+06	3.56855e+06	4020290	2.43258e+06	2.53634e+06	3.08538e+06	20761692	2751666	4.44841e+06	10587276	2.00833e+06	5212107	5102613	4.74125e+06
O95084	PRSS23	Serine protease 23	PRS23_HUMAN	645719	2368507	1.23191e+06	1.5771e+06	1.36484e+06	1.09164e+06	1.77361e+06	776370	918134	1.73788e+06	565532	1.41041e+06	1657958	914142	2.41602e+06	1.62825e+06	1.35576e+06	1.5383e+06	NaN	1.47368e+06	1.38058e+06	1.8951e+06	1.48404e+06	1.69169e+06	1.30824e+06	979510	843003	1.4251e+06	1.73138e+06	1.99338e+06	1.53916e+06	850950	1.89793e+06	682827	1.59923e+06	1.69453e+06	694526	1.85141e+06	1.39416e+06	1395538	976143	1230166	1.91093e+06	1.93546e+06	1.81081e+06	NaN
O95153	TSPOAP1	Peripheral-type benzodiazepine receptor-associated protein 1	RIMB1_HUMAN	NaN	92397.4	NaN	NaN	NaN	NaN	NaN	NaN	477765	NaN	NaN	NaN	NaN	NaN	NaN	NaN	247222	NaN	NaN	NaN	NaN	NaN	NaN	NaN	NaN	NaN	14966.3	NaN	NaN	NaN	NaN	NaN	NaN	NaN	NaN	NaN	NaN	NaN	NaN	NaN	NaN	69480.6	NaN	NaN	NaN	18410
O95155	UBE4B	Ubiquitin conjugation factor E4 B	UBE4B_HUMAN	2.07041e+06	89290.6	1.19344e+06	3.03842e+06	141707	NaN	728014	1.41511e+06	2.706	2.05919e+06	1.83663e+06	13363.4	85212.9	3.81358e+06	2.07502	261950	439253	501275	1337588	NaN	2716599	17675.1	2.03997e+06	1.21578e+06	3106755	8.1624e+06	NaN	NaN	802340	24118.4	NaN	1.60431e+06	128871	156418	1.14234e+06	41220.8	1.05848e+06	135.028	1.36797e+06	474405	1593134	NaN	141829	238860	6473.64	17014.6
O95163	ELP1	Elongator complex protein 1	ELP1_HUMAN	NaN	NaN	NaN	NaN	NaN	NaN	NaN	NaN	NaN	NaN	NaN	NaN	NaN	NaN	NaN	NaN	NaN	NaN	NaN	NaN	NaN	NaN	NaN	NaN	NaN	NaN	NaN	NaN	NaN	NaN	NaN	NaN	5171.68	NaN	NaN	NaN	NaN	NaN	NaN	NaN	NaN	NaN	NaN	NaN	NaN	NaN
O95182	NDUFA7	NADH dehydrogenase [ubiquinone] 1 alpha subcomplex subunit 7	NDUA7_HUMAN	144342	80483.1	102886	139931	51023.8	68454.1	105209	99487.6	19765	119994	147989	114311	79187	175445	86541.4	166504	35285.7	83474	95679.4	109114	62166	113412	104476	91055.4	94134.7	159030	102732	107481	103360	88790.7	91865	104723	129355	117361	114528	110792	114007	127717	145312	129519	85055.9	109944	100084	154604	74018	114248
O95197	RTN3	Reticulon-3	RTN3_HUMAN	NaN	NaN	NaN	NaN	NaN	NaN	NaN	NaN	NaN	NaN	NaN	NaN	NaN	NaN	NaN	NaN	NaN	NaN	NaN	NaN	NaN	NaN	NaN	NaN	NaN	NaN	NaN	NaN	NaN	NaN	NaN	NaN	NaN	NaN	NaN	NaN	NaN	10286.8	NaN	NaN	NaN	NaN	NaN	NaN	NaN	NaN
O95236	APOL3	Apolipoprotein L3	APOL3_HUMAN	387328	313655	332310	471708	633765	550254	302323	387332	415681	614894	706155	660558	601603	929527	1.0538e+06	444575	1.31253e+06	480532	464180	528102	431168	440776	330936	790298	1.44728e+06	1.0806e+06	1.04037e+06	1.0445e+06	887978	524690	400565	499279	317835	687577	761968	291578	563376	302501	404710	272039	777231	413716	436530	506949	524825	378188
O95243	MBD4	Methyl-CpG-binding domain protein 4	MBD4_HUMAN	33412.2	NaN	18167.2	NaN	NaN	54717.7	35546.7	NaN	NaN	16945.8	6749.69	7503.78	NaN	NaN	NaN	1	NaN	NaN	NaN	NaN	NaN	NaN	1.04106	35046.9	53173.3	NaN	NaN	NaN	NaN	NaN	1.03778	38592.4	51950.7	24331.3	NaN	19840.7	NaN	NaN	NaN	NaN	NaN	NaN	NaN	NaN	38243.2	NaN
O95249	GOSR1	Golgi SNAP receptor complex member 1	GOSR1_HUMAN	27335.8	66146.9	17675	31330.9	1.23112	30552.6	14953.3	1.21511	NaN	41227.5	32055.7	47924	59270.5	55568.8	54894.3	28159.2	11802	34047.9	35605.5	28180.1	4267.36	64057.1	59087.3	16597.3	33968.7	34699.2	37316.7	1.6486	8402.17	40341.3	39581.2	33523.4	1.08332	7346.79	20506.2	12490.5	7865.73	120177	57859.5	21798.8	6559.76	74681.3	11294	36003.2	10980.6	30313.1
O95274	LYPD3	Ly6/PLAUR domain-containing protein 3	LYPD3_HUMAN	26637.9	47969.9	8790.86	21503.5	15447.1	30888.1	NaN	16467	29725	89792.2	3278.99	17768.2	7223.4	35552	14535.8	35189.4	167284	13473.4	48541.8	5516.31	601022	20226.3	15097.8	7783.6	36810.2	31917.1	47268.1	19228.8	10217.8	22.7221	10940.5	3503.03	37930.6	1.23583	2692.4	32569.4	16122	2510.93	15901.1	4358.82	17083.2	51597.6	89646	20166.4	36710.7	35395.5
O95294	RASAL1	RasGAP-activating-like protein 1	RASL1_HUMAN	NaN	NaN	1	1.30708	NaN	NaN	1	97576	NaN	1	1	1.04698	NaN	1.4883	NaN	1	2769.69	NaN	22338.5	NaN	NaN	1	NaN	1	1.27012	1.49743	NaN	1.64861	12882.1	NaN	NaN	1.13403	6530.1	NaN	NaN	1.0817	10845.8	4908.18	1.35088	NaN	1.14119	NaN	1	1.03557	NaN	1.31997
O95336	PGLS	6-phosphogluconolactonase	6PGL_HUMAN	10457.1	8377.7	NaN	1.30708	NaN	42176.6	15980.3	6887.18	NaN	7866.05	4760.28	NaN	29650.2	15936.6	NaN	1	NaN	NaN	1744.85	NaN	17694.5	5451.85	NaN	1	8672.5	7913.92	NaN	18762.2	11265.8	NaN	15113.4	1.13404	15630.3	5033.48	1.2163	4007.1	29047.1	26003.5	4237.57	NaN	9175.23	12890.8	7709.08	11381.9	27193.9	10632.6
O95347	SMC2	Structural maintenance of chromosomes protein 2	SMC2_HUMAN	1697285	NaN	248765	813.232	458912	513439	NaN	290068	208577	251873	526643	469159	596607	1.41643e+06	423270	436150	NaN	414020	376315	581538	244107	279881	273217	367194	357594	1.42251e+06	231466	581254	259605	242417	234062	299118	346864	197180	300974	244794	291570	332396	1.12954e+06	641612	335194	NaN	207458	375436	219180	525439
O95359	TACC2	Transforming acidic coiled-coil-containing protein 2	TACC2_HUMAN	NaN	NaN	NaN	NaN	NaN	NaN	58906.9	NaN	NaN	NaN	NaN	23599460	NaN	NaN	NaN	NaN	1.70341e+06	NaN	NaN	NaN	NaN	NaN	NaN	NaN	NaN	NaN	104104	NaN	NaN	NaN	NaN	NaN	NaN	NaN	NaN	NaN	NaN	NaN	NaN	NaN	NaN	NaN	NaN	1.83356e+06	62786848	NaN
O95393	BMP10	Bone morphogenetic protein 10	BMP10_HUMAN	NaN	NaN	NaN	NaN	NaN	NaN	NaN	3571.44	NaN	NaN	NaN	3880.05	NaN	NaN	NaN	1	NaN	NaN	1	NaN	NaN	NaN	NaN	NaN	NaN	NaN	NaN	NaN	NaN	NaN	NaN	NaN	NaN	NaN	NaN	NaN	NaN	NaN	NaN	NaN	31157.2	NaN	NaN	NaN	NaN	NaN
O95394	PGM3	Phosphoacetylglucosamine mutase	AGM1_HUMAN	NaN	NaN	NaN	NaN	NaN	NaN	NaN	NaN	NaN	1	NaN	1275.02	NaN	NaN	NaN	NaN	NaN	NaN	NaN	NaN	8202.7	NaN	NaN	NaN	NaN	NaN	NaN	NaN	NaN	NaN	NaN	NaN	NaN	NaN	NaN	NaN	1.07838	NaN	NaN	NaN	NaN	8776.04	NaN	NaN	NaN	NaN
O95427	PIGN	GPI ethanolamine phosphate transferase 1	PIGN_HUMAN	NaN	NaN	1	NaN	NaN	NaN	NaN	NaN	NaN	NaN	NaN	NaN	NaN	NaN	NaN	150363	NaN	124248	NaN	NaN	NaN	NaN	NaN	NaN	NaN	NaN	NaN	NaN	NaN	30479.3	NaN	13695	NaN	NaN	NaN	NaN	14712.6	1	15307.3	NaN	NaN	NaN	12201.8	NaN	NaN	NaN
O95428	PAPLN	Papilin	PPN_HUMAN	NaN	1.81311	6378.26	NaN	14623.7	NaN	NaN	5462.61	NaN	NaN	3741.37	1177.36	NaN	NaN	NaN	NaN	NaN	3764.05	NaN	NaN	NaN	NaN	NaN	NaN	NaN	NaN	NaN	NaN	NaN	986.368	2712.61	NaN	2496.36	NaN	NaN	NaN	NaN	NaN	NaN	3990.93	NaN	NaN	6030.23	NaN	NaN	NaN
O95436	SLC34A2	Sodium-dependent phosphate transport protein 2B	NPT2B_HUMAN	NaN	NaN	NaN	NaN	NaN	NaN	NaN	NaN	111263	19321.2	21866.4	NaN	NaN	NaN	NaN	18688.6	NaN	NaN	NaN	30519	NaN	60746.7	NaN	NaN	NaN	NaN	76571.5	NaN	NaN	NaN	NaN	NaN	NaN	5191.98	NaN	NaN	NaN	NaN	NaN	NaN	NaN	NaN	NaN	NaN	NaN	NaN
O95445	APOM	Apolipoprotein M	APOM_HUMAN	16455052	28404296	13223350	16582517	15071940	11890831	11594529	12143484	18467464	7.97286e+06	15187628	11261774	14190093	18479426	11300163	10909848	5.90544e+06	20080508	12210126	12091356	8587566	8928215	18734212	16979664	16613240	17742316	13519917	6747301	19279536	11688324	14036335	12860204	16131450	12237478	14631843	15830038	8993288	10097990	17284618	9699808	23917732	12437546	17750438	6129278	10674821	15712852
O95450	ADAMTS2	A disintegrin and metalloproteinase with thrombospondin motifs 2	ATS2_HUMAN	NaN	NaN	NaN	NaN	NaN	NaN	NaN	NaN	NaN	NaN	3476.11	3028.13	NaN	NaN	NaN	NaN	NaN	NaN	NaN	NaN	NaN	NaN	NaN	NaN	NaN	NaN	NaN	NaN	NaN	NaN	3228.97	NaN	NaN	NaN	NaN	NaN	NaN	NaN	NaN	NaN	NaN	NaN	3801.65	3059.11	NaN	NaN
O95453	PARN	Poly(A)-specific ribonuclease PARN	PARN_HUMAN	NaN	NaN	NaN	NaN	30275.3	102242	53269.3	NaN	52651.6	NaN	NaN	NaN	NaN	NaN	NaN	NaN	NaN	NaN	28571.9	NaN	NaN	23535.3	NaN	45151.2	NaN	NaN	NaN	NaN	65455	49001.5	NaN	NaN	32643.9	NaN	120298	NaN	NaN	NaN	NaN	54565.8	NaN	NaN	38336	NaN	NaN	NaN
O95455	TGDS	dTDP-D-glucose 4,6-dehydratase	TGDS_HUMAN	NaN	NaN	NaN	NaN	NaN	NaN	1	NaN	NaN	NaN	NaN	NaN	NaN	NaN	NaN	NaN	NaN	NaN	NaN	NaN	NaN	NaN	NaN	NaN	NaN	NaN	NaN	NaN	1.27139	NaN	NaN	NaN	NaN	NaN	1.21631	NaN	NaN	NaN	NaN	NaN	NaN	NaN	1	NaN	NaN	NaN
O95477	ABCA1	Phospholipid-transporting ATPase ABCA1	ABCA1_HUMAN	9808.03	3099.67	25024	2543.1	479547	1644.09	4700.86	2783.87	70460.2	98784.2	25797.8	NaN	1.05134	NaN	NaN	3279.87	NaN	946309	47800.7	17605.1	10848	101521	21137.5	45249.3	15732.7	NaN	26281	3790.52	54016.4	387700	NaN	3305.74	86870.6	79830.8	NaN	36872.4	NaN	7544.69	10524.3	21721.1	6947.58	150796	3994.02	40762.2	NaN	39582.8
O95479	H6PD	GDH/6PGL endoplasmic bifunctional protein	G6PE_HUMAN	214489	72506.3	119759	127739	64935.2	218437	120704	111944	280734	238528	85080.2	324461	138703	204048	107960	153517	115245	49945.6	173824	153287	386227	143561	142759	214490	141936	232285	146268	145578	157035	112510	172082	109858	172523	169648	163596	210222	116207	116538	203382	197041	160040	184972	137330	207889	147833	184204
O95497	VNN1	Pantetheinase	VNN1_HUMAN	493202	197100	195314	574641	488382	171444	627678	559345	68134.5	122880	193599	774480	124914	407685	246433	427359	509387	273625	283092	122306	1.20205e+06	277070	96094.5	451996	129048	366845	396892	430770	145460	195626	127058	109041	65255.6	193772	316958	430983	141448	412217	339728	216894	206952	442666	243298	179144	550824	545986
O95498	VNN2	Pantetheine hydrolase VNN2	VNN2_HUMAN	NaN	NaN	NaN	NaN	NaN	NaN	NaN	NaN	NaN	NaN	NaN	NaN	NaN	NaN	NaN	NaN	NaN	NaN	NaN	NaN	NaN	NaN	NaN	NaN	NaN	NaN	NaN	NaN	NaN	NaN	NaN	NaN	NaN	NaN	NaN	NaN	NaN	NaN	NaN	NaN	NaN	NaN	NaN	105260	NaN	NaN
O95502	NPTXR	Neuronal pentraxin receptor	NPTXR_HUMAN	NaN	NaN	1914.29	NaN	NaN	NaN	NaN	NaN	NaN	NaN	NaN	1.04698	NaN	NaN	NaN	1909.64	NaN	NaN	1	NaN	NaN	2872.72	NaN	NaN	NaN	NaN	NaN	NaN	NaN	NaN	NaN	NaN	NaN	NaN	NaN	NaN	NaN	NaN	NaN	NaN	NaN	NaN	NaN	5743.3	NaN	NaN
O95544	NADK	NAD kinase	NADK_HUMAN	NaN	NaN	NaN	NaN	NaN	NaN	NaN	6628.94	NaN	NaN	NaN	NaN	NaN	NaN	NaN	NaN	NaN	NaN	NaN	NaN	NaN	NaN	NaN	NaN	NaN	NaN	NaN	2739.33	NaN	NaN	NaN	NaN	NaN	NaN	4137.61	NaN	1.07838	NaN	NaN	NaN	NaN	NaN	NaN	1.03556	NaN	NaN
O95600	KLF8	Krueppel-like factor 8	KLF8_HUMAN	1.39363	NaN	1	NaN	NaN	NaN	1	NaN	101998	NaN	1	5789.91	NaN	NaN	NaN	NaN	390837	NaN	33597.8	1	NaN	NaN	NaN	NaN	NaN	NaN	NaN	7675.44	NaN	NaN	NaN	NaN	1.08332	NaN	33493.1	NaN	NaN	NaN	85340.1	NaN	NaN	77876	1	NaN	NaN	28891.2
O95613	PCNT	Pericentrin	PCNT_HUMAN	NaN	31292	1	NaN	NaN	NaN	NaN	NaN	NaN	NaN	1	NaN	NaN	NaN	NaN	NaN	NaN	NaN	NaN	NaN	NaN	1	144629	NaN	NaN	NaN	NaN	NaN	NaN	NaN	NaN	NaN	NaN	NaN	NaN	NaN	NaN	NaN	NaN	NaN	NaN	NaN	NaN	NaN	NaN	NaN
O95633	FSTL3	Follistatin-related protein 3	FSTL3_HUMAN	8973.9	NaN	1	1.30708	NaN	284.017	1	19127.7	NaN	1401.72	1	15115.7	NaN	1.4883	2.07501	1	NaN	NaN	263.871	8588.34	13222.3	6119.15	1.04107	2755.18	1.27012	NaN	NaN	1.64861	1.27138	NaN	5668.26	NaN	NaN	NaN	NaN	1.0817	23994.8	1	1.35088	1	1.14119	NaN	1	23768.1	1.65534	NaN
O95678	KRT75	Keratin, type II cytoskeletal 75	K2C75_HUMAN	NaN	NaN	NaN	NaN	NaN	NaN	NaN	22212.9	NaN	NaN	NaN	NaN	NaN	NaN	NaN	NaN	NaN	NaN	NaN	NaN	NaN	NaN	3902.06	NaN	NaN	NaN	NaN	NaN	NaN	NaN	NaN	NaN	NaN	NaN	NaN	NaN	NaN	27834.2	NaN	NaN	NaN	NaN	NaN	NaN	NaN	NaN
O95696	BRD1	Bromodomain-containing protein 1	BRD1_HUMAN	32064.2	NaN	12127.3	NaN	NaN	NaN	NaN	NaN	NaN	10674.2	18153.2	1.19363e+06	705621	NaN	12283.8	13131.5	NaN	NaN	15556.7	11064.3	6945.19	NaN	37051.6	NaN	12542.4	NaN	NaN	NaN	19910.9	NaN	NaN	NaN	NaN	18132	12795.7	NaN	250738	NaN	NaN	NaN	NaN	NaN	NaN	104549	NaN	NaN
O95714	HERC2	E3 ubiquitin-protein ligase HERC2	HERC2_HUMAN	2575461	3.68986e+06	NaN	NaN	NaN	NaN	NaN	2.40088e+06	1.15782e+06	4216377	3.06078e+06	8.37764e+06	NaN	3.09574e+06	NaN	NaN	NaN	NaN	2.06603e+06	1.84801e+06	1.53071e+06	2.19894e+06	5747184	NaN	2.73587e+06	3.26675e+06	2598464	NaN	2.69067e+06	NaN	1.95855e+06	NaN	NaN	NaN	NaN	5.08744e+06	NaN	2.26052e+06	2032875	NaN	NaN	NaN	NaN	2.44842e+06	1.92513e+06	NaN
O95744	PMS2P2	Putative postmeiotic segregation increased 2-like protein 2	PM2P2_HUMAN	1.29596e+06	2917326	NaN	2159359	2.19728e+06	NaN	260806	1058235	2.71212e+06	924443	871659	1.48283e+06	604908	NaN	4.11107e+06	527513	4.94002e+06	1.63271e+06	1.00257e+06	648354	2.47536e+06	1.26469e+06	723174	1.08394e+06	NaN	1.22491e+06	815784	2.55045e+06	NaN	1.86385e+06	547375	721356	936037	814584	1.1437e+06	969056	727993	463635	1.10009e+06	NaN	923243	NaN	NaN	NaN	1.12795e+06	NaN
O95747	OXSR1	Serine/threonine-protein kinase OSR1	OXSR1_HUMAN	2881.57	NaN	4346.94	5712.84	4141.61	4998.33	14192	14346.3	NaN	3373.97	1764.97	1823.4	3016.26	2506.19	NaN	1136.5	NaN	15636.8	2584.91	2695.17	6215.84	2864.91	NaN	2345.67	7508.5	NaN	3402.78	3519	9856.62	11465.7	7585.29	2049.85	817.607	NaN	3975.73	1381.03	14770.4	10995.6	1781.63	1	3105.01	787.645	10747.8	4493.1	6381.58	NaN
O95785	WIZ	Protein Wiz	WIZ_HUMAN	NaN	11869.5	NaN	NaN	NaN	NaN	NaN	NaN	NaN	11349.2	NaN	NaN	NaN	NaN	12027.9	NaN	NaN	NaN	14824	76612.4	NaN	351774	NaN	1047.64	NaN	126828	NaN	2979.81	NaN	NaN	97908.5	NaN	NaN	NaN	NaN	NaN	NaN	NaN	NaN	NaN	NaN	NaN	NaN	NaN	2514.03	398332
O95786	RIGI	Antiviral innate immune response receptor RIG-I	RIGI_HUMAN	NaN	NaN	NaN	32475	NaN	1.24128	NaN	NaN	NaN	NaN	NaN	1.04697	NaN	NaN	NaN	16387.9	NaN	NaN	NaN	80606.3	NaN	NaN	1.04106	NaN	NaN	NaN	NaN	91695.5	NaN	NaN	NaN	NaN	NaN	NaN	NaN	63007.1	NaN	NaN	NaN	NaN	82226.9	25048.9	NaN	52090.6	NaN	124476
O95810	CAVIN2	Caveolae-associated protein 2	CAVN2_HUMAN	68256	32399.4	28008.5	159178	1.23112	249621	NaN	61690.8	NaN	41991.8	NaN	2625.95	NaN	18663.7	2.075	NaN	30541.1	NaN	10653.5	NaN	30307.1	51034.9	NaN	43499.5	24330.6	24317.9	25972.8	NaN	NaN	NaN	NaN	NaN	77308.9	NaN	112270	NaN	NaN	69285.5	14558.9	38082.9	153892	NaN	NaN	64709.9	197272	76813.4
O95822	MLYCD	Malonyl-CoA decarboxylase, mitochondrial	DCMC_HUMAN	1.39363	29.8355	1	1.30707	3144.07	46.3199	1	1.21511	261.659	1	1	1.04697	1.05133	1.48829	2.07499	1	4.31492	17243.9	1	1	1.19808	30.8359	1.04106	1	26.1285	1.49742	1147.03	NaN	1.27139	1044.44	1.03778	1.13403	1.08332	30.1687	909.747	1.08169	1.07838	1	NaN	656.508	1.14119	39.3235	29.8641	1.03556	1.65533	1.31998
O95834	EML2	Echinoderm microtubule-associated protein-like 2	EMAL2_HUMAN	NaN	NaN	NaN	1.30708	NaN	1.24127	NaN	NaN	NaN	NaN	NaN	NaN	NaN	1.4883	NaN	NaN	NaN	NaN	NaN	NaN	5657.2	NaN	NaN	NaN	NaN	NaN	NaN	NaN	NaN	NaN	NaN	NaN	NaN	NaN	6132.33	NaN	NaN	1	1.35088	NaN	NaN	NaN	NaN	NaN	NaN	NaN
O95837;P29992;P50148	GNA14;GNA11;GNAQ	Guanine nucleotide-binding protein subunit alpha-14;Guanine nucleotide-binding protein subunit alpha-11;Guanine nucleotide-binding protein G(q) subunit alpha	GNA14_HUMAN;GNA11_HUMAN;GNAQ_HUMAN	NaN	NaN	NaN	NaN	NaN	NaN	NaN	NaN	NaN	NaN	NaN	NaN	NaN	NaN	NaN	NaN	NaN	NaN	NaN	NaN	NaN	NaN	NaN	NaN	NaN	NaN	NaN	NaN	NaN	NaN	NaN	NaN	NaN	NaN	NaN	NaN	NaN	NaN	NaN	NaN	NaN	NaN	NaN	NaN	NaN	NaN
O95864	FADS2	Acyl-CoA 6-desaturase	FADS2_HUMAN	NaN	NaN	NaN	101349	202953	NaN	283029	392069	NaN	377742	NaN	320237	370646	33649.9	NaN	NaN	389406	NaN	228725	261016	NaN	NaN	283825	173612	NaN	196660	342981	NaN	145870	NaN	373484	221017	388755	380168	284242	367029	271850	837486	218534	NaN	401353	697919	NaN	355492	358978	436325
O95865	DDAH2	N(G),N(G)-dimethylarginine dimethylaminohydrolase 2	DDAH2_HUMAN	NaN	NaN	1877.1	11695.6	NaN	12433.9	NaN	9343.8	NaN	3164.71	NaN	4400.88	1.05133	NaN	NaN	NaN	NaN	NaN	4724.26	NaN	18829.6	2277.39	NaN	NaN	NaN	6819.23	NaN	NaN	NaN	NaN	NaN	NaN	NaN	NaN	5516.78	NaN	2248.76	78817.4	NaN	NaN	1235.13	6392.64	6185.51	2272.88	10177.1	4477.15
O95866	MPIG6B	Megakaryocyte and platelet inhibitory receptor G6b	G6B_HUMAN	NaN	NaN	NaN	3087.39	NaN	23750.5	NaN	NaN	NaN	NaN	NaN	NaN	NaN	NaN	NaN	NaN	NaN	NaN	NaN	NaN	NaN	NaN	NaN	NaN	NaN	NaN	NaN	NaN	NaN	NaN	NaN	NaN	NaN	NaN	NaN	NaN	NaN	NaN	NaN	NaN	NaN	NaN	NaN	NaN	NaN	NaN
O95867	LY6G6C	Lymphocyte antigen 6 complex locus protein G6c	LY66C_HUMAN	NaN	NaN	NaN	NaN	NaN	NaN	NaN	3259.2	NaN	NaN	NaN	NaN	NaN	NaN	NaN	NaN	NaN	NaN	NaN	NaN	NaN	NaN	NaN	NaN	51210.4	NaN	NaN	NaN	NaN	NaN	NaN	NaN	NaN	NaN	NaN	NaN	NaN	83052.4	NaN	NaN	NaN	NaN	NaN	NaN	NaN	NaN
O95897	OLFM2	Noelin-2	NOE2_HUMAN	87577.1	94206.9	56178.2	171787	203923	73566.3	115308	105237	126776	67657.1	106034	147122	43595.5	67807.4	306490	93584.8	NaN	NaN	77847.3	56089.1	58829.4	68226.1	58303.9	46368.4	151838	58807.2	56611.1	64163.1	36223.9	60702.3	103494	42708.4	32830.6	34399	321280	68048.2	20486.1	39889.7	83425.7	71752.1	62344.2	109878	84413.2	131876	78610	138803
O95967	EFEMP2	EGF-containing fibulin-like extracellular matrix protein 2	FBLN4_HUMAN	53856.4	66185.2	60179.6	38016.5	617.727	89375	49636.3	111223	25464.9	160325	145324	174328	33605.3	73919.4	97220.4	14845.2	77888.1	406131	91715.7	100375	135012	52578.2	71875.5	40979.8	86360.4	29614.6	173373	92052.3	13454.2	58088.4	187384	90611.4	126413	64422.9	50147.7	79346.9	70990	91947.6	81714.4	126971	71812.8	35685.9	55050.7	49006.3	112485	96104.1
O95969	SCGB1D2	Secretoglobin family 1D member 2	SG1D2_HUMAN	NaN	NaN	NaN	NaN	NaN	NaN	NaN	NaN	NaN	NaN	NaN	NaN	NaN	NaN	NaN	NaN	NaN	NaN	NaN	NaN	NaN	NaN	1.04106	NaN	NaN	NaN	NaN	NaN	NaN	NaN	NaN	NaN	NaN	NaN	NaN	NaN	NaN	NaN	NaN	NaN	NaN	NaN	NaN	NaN	NaN	NaN
O95980	RECK	Reversion-inducing cysteine-rich protein with Kazal motifs	RECK_HUMAN	93846.9	130063	65217.3	17716.4	14718.1	25246.7	61252.6	46605	140007	92257.8	123392	86826.2	46630.8	138117	22654.6	44663.4	19409132	17399.1	76322.9	62861.5	15708.4	17024.2	70018.7	51834.7	88021.3	29449.9	80358.4	16531	16807.8	69262.2	73099.5	40867.4	96823.1	54887.8	63617.7	73103.8	52680.6	59175.5	123064	58053.4	64006.7	65878.5	54284.8	42001.9	20924.8	91027.2
O95995	GAS8	Dynein regulatory complex subunit 4	DRC4_HUMAN	NaN	NaN	NaN	NaN	NaN	NaN	1	NaN	NaN	8009.67	NaN	NaN	1.05134	1.4883	NaN	NaN	NaN	NaN	1	NaN	NaN	1	5758.09	5057.79	NaN	NaN	NaN	1.64861	NaN	NaN	NaN	1.13404	NaN	NaN	4136.56	1.0817	5133.45	NaN	NaN	NaN	NaN	NaN	1	1.03557	1.65534	NaN
O95996	APC2	Adenomatous polyposis coli protein 2	APCL_HUMAN	NaN	76010.9	283935	303948	815629	90461.4	NaN	55117.9	NaN	161151	236631	231690	426085	77425.4	NaN	203205	24003.5	591366	99144.1	86207.8	NaN	202009	239709	145653	254071	115372	130904	44966.9	253776	503178	144194	219842	136660	313160	187464	216717	213351	NaN	NaN	98333.1	133509	81494.8	NaN	108040	NaN	58369.8
O95998	IL18BP	Interleukin-18-binding protein	I18BP_HUMAN	54227.9	47141.9	43904.9	41275.5	57223.5	44863.4	32419.7	77088.1	41386.7	85517.8	49160.7	110039	72284.9	81890.5	29293.9	92991.1	77810.4	43879.9	97281	92076.2	86441	68913.6	99579.1	89801.3	68658.9	184038	46727.4	112865	71299.2	55758.8	85325.7	75416.8	77258.8	53606.2	62771.6	76129.6	86624.5	64297.2	149467	103337	72623.4	71968.6	101934	147655	78783.2	101905
O96005	CLPTM1	Putative lipid scramblase CLPTM1	CLPT1_HUMAN	NaN	NaN	148014	71310.3	57659.2	NaN	40383.9	76242	10762	91909.6	61848.3	NaN	NaN	103930	64516.6	40847.2	NaN	NaN	38988.1	74225.5	NaN	NaN	NaN	NaN	160090	75865	80688.2	156374	189691	215089	54024.6	NaN	NaN	153183	71942.8	NaN	NaN	42600.5	NaN	NaN	75628.3	75077.9	120930	64580.9	34756.2	NaN
O96009	NAPSA	Napsin-A	NAPSA_HUMAN	NaN	NaN	NaN	NaN	NaN	NaN	NaN	NaN	38688.4	NaN	NaN	NaN	NaN	NaN	NaN	NaN	714.429	NaN	NaN	NaN	1.19808	NaN	NaN	NaN	NaN	1.49744	144543	NaN	NaN	NaN	NaN	NaN	NaN	6299.74	NaN	47251.3	8293.61	7491.97	NaN	33688.8	NaN	NaN	NaN	NaN	NaN	NaN
O96019	ACTL6A	Actin-like protein 6A	ACL6A_HUMAN	NaN	NaN	NaN	NaN	NaN	NaN	NaN	NaN	NaN	NaN	NaN	NaN	NaN	NaN	NaN	NaN	NaN	NaN	NaN	NaN	16943.6	NaN	1.04106	NaN	NaN	NaN	NaN	NaN	1.27138	NaN	NaN	NaN	NaN	NaN	NaN	NaN	NaN	NaN	NaN	NaN	NaN	NaN	NaN	NaN	NaN	NaN
P00167	CYB5A	Cytochrome b5	CYB5_HUMAN	NaN	NaN	NaN	NaN	NaN	NaN	42765.8	NaN	NaN	23391.6	NaN	58072.3	NaN	NaN	NaN	NaN	NaN	NaN	NaN	NaN	13248.4	NaN	NaN	NaN	NaN	NaN	NaN	16737.3	1.27138	NaN	20942	NaN	NaN	NaN	NaN	NaN	35688.1	29620.6	NaN	NaN	NaN	NaN	NaN	NaN	NaN	NaN
P00325	ADH1B	All-trans-retinol dehydrogenase [NAD(+)] ADH1B	ADH1B_HUMAN	NaN	NaN	NaN	NaN	NaN	NaN	NaN	NaN	NaN	NaN	4971.54	101610	NaN	NaN	NaN	1896.36	NaN	NaN	NaN	NaN	56642.4	NaN	NaN	1	1.27012	NaN	NaN	NaN	NaN	NaN	NaN	NaN	NaN	NaN	NaN	NaN	NaN	NaN	NaN	6665.81	NaN	NaN	NaN	NaN	NaN	NaN
P00326	ADH1C	Alcohol dehydrogenase 1C	ADH1G_HUMAN	45775.1	34728.9	11342.5	55538.4	25854.2	NaN	45036.4	28852.4	21100.2	NaN	34978.3	167463	9646.3	NaN	13782.4	1	NaN	NaN	19073.9	NaN	104932	23208.3	12481.3	17433.6	57672.4	NaN	NaN	15555.2	NaN	16685.9	4515.52	28224.4	17825.7	NaN	NaN	NaN	NaN	46539.6	9596.22	77164.2	1.14119	34723.9	9136.55	3691.3	NaN	8916.03
P00338	LDHA	L-lactate dehydrogenase A chain	LDHA_HUMAN	1.03383e+06	776360	496386	1.09684e+06	333790	1.30338e+06	1233297	619769	270349	1.08614e+06	659057	599770	450705	1.13776e+06	706032	534170	1.71802e+06	461505	810271	770105	801029	784031	714496	617951	762390	1.31539e+06	945246	726256	746883	367787	646470	861535	1.17808e+06	625697	987561	722010	896594	805949	944676	1.08391e+06	587367	1.24349e+06	464914	1.16845e+06	1.28342e+06	778172
P00352	ALDH1A1	Aldehyde dehydrogenase 1A1	AL1A1_HUMAN	43827.5	13827.4	27121	18894.2	59510.9	52260.2	97715.9	15353.4	20482.1	41416.2	30542.9	280935	270226	98765	34575.9	28228.1	46827.3	147700	39132.3	28896.9	82246.3	34788.5	9500.61	17635.9	21782.7	52075.7	13680.4	67161.3	51931.2	62476.5	24165.7	45703.4	6422.11	7098.76	14718.1	19874.7	71460.6	13389.9	47639.3	43015	37034	64561.1	53688.4	16979.9	12516.4	9567.06
P00367	GLUD1	Glutamate dehydrogenase 1, mitochondrial	DHE3_HUMAN	165118	833752	4166.04	6433.98	NaN	44120.7	1	131199	102606	36405.4	27472.1	152300	NaN	17567.5	16183.5	3273.93	NaN	NaN	1	NaN	81490.4	37373.6	11014.1	NaN	NaN	11160.5	32296	175561	NaN	NaN	68192.1	1.13404	NaN	40157.1	1.21629	NaN	71037.8	6387.38	13866.3	8339.8	1.14119	12097.9	NaN	615301	132190	4240.06
P00387	CYB5R3	NADH-cytochrome b5 reductase 3	NB5R3_HUMAN	8458.71	3651.45	12641.5	13856.6	NaN	13023.7	5889.9	11256.1	NaN	10708.4	2031.48	7353.1	NaN	14158.6	NaN	1	NaN	NaN	NaN	NaN	NaN	7250.61	NaN	6768.27	4224.44	12488.5	1.14763	NaN	1.27138	NaN	26522.4	5023.14	3679.07	6165.2	2529.51	NaN	6988.66	12304.9	NaN	12932.8	6406.12	NaN	1	NaN	11635.3	8903.8
P00390	GSR	Glutathione reductase, mitochondrial	GSHR_HUMAN	357019	275008	215707	269675	104339	299354	257061	211188	232799	406740	250589	326515	158791	385315	253247	171943	464573	243385	268449	274769	1.10668e+06	258982	307307	236945	218170	452936	348783	386307	262139	159560	230558	279876	288368	333512	259833	188027	293238	183508	363031	336138	281556	390096	215166	406845	375467	181957
P00403	MT-CO2	Cytochrome c oxidase subunit 2	COX2_HUMAN	NaN	NaN	NaN	NaN	NaN	NaN	NaN	NaN	NaN	NaN	NaN	NaN	NaN	NaN	NaN	NaN	NaN	NaN	NaN	NaN	NaN	NaN	NaN	NaN	NaN	NaN	NaN	NaN	NaN	NaN	NaN	NaN	NaN	NaN	NaN	NaN	NaN	66583.2	NaN	NaN	NaN	NaN	NaN	NaN	NaN	NaN
P00441	SOD1	Superoxide dismutase [Cu-Zn]	SODC_HUMAN	50826.3	124630	61296.1	145817	34948.4	77477	278625	60012	162360	67717.5	30486.3	41405.2	28575.5	124556	60876	31196.7	418396	305119	57641.7	59360.6	49988	53037.5	24370.4	15294.8	130127	85289.6	63171.7	109916	226025	226657	224650	95470	37395.4	76938	60486.8	44341.6	492781	18116.7	130322	56539.4	53465.1	233675	181705	87640.8	133233	132056
P00450	CP	Ceruloplasmin	CERU_HUMAN	225170224	182871360	184128320	156923776	112827544	172664992	173410976	145671856	244807952	244880480	191935920	179793520	125058816	250219184	136369312	233205968	153283552	186727888	175115216	250332784	202465120	208385280	220922976	174518928	156484416	241276432	208632976	156320672	177944656	151254064	192680912	197912192	270372800	237165328	230261600	277707584	138679744	189578336	245257696	269946272	179019472	269407040	231741888	217392160	186305088	165707904
P00451	F8	Coagulation factor VIII	FA8_HUMAN	10094.8	8197.29	10569.6	200.21	7947.82	1744.6	26581.9	5360.21	240489	30619.4	11567.3	1561.73	9038.49	9638.59	12324.9	25052.2	13522.6	18353.3	12003.4	37284.9	2661.94	27705.8	8785.25	16500.8	12982.4	27925.3	10819.5	7086.8	10128.8	16357.1	23839.8	17591.2	35392.5	5628.29	12450	27436.6	18587	20898.1	13698.3	28742.5	1631.68	7398.38	14893.7	26553.1	3431	4931.9
P00480	OTC	Ornithine transcarbamylase, mitochondrial	OTC_HUMAN	41822	2972.22	51525	14455.5	10781.1	7216.12	NaN	17005.2	NaN	7313.45	29722.5	147608	NaN	18773.6	11663.4	NaN	NaN	1.03068	1259.14	NaN	48986.4	3524.61	1.04106	NaN	583564	1.49742	NaN	NaN	1.27139	3930.5	NaN	1.13404	NaN	1.23584	NaN	1.08169	NaN	NaN	39715.8	1	1076.55	11739.5	19085.7	1.03557	1.65533	NaN
P00488	F13A1	Coagulation factor XIII A chain	F13A_HUMAN	2.52135e+06	6.59825e+06	2.94471e+06	3.51414e+06	2.84501e+06	3.84114e+06	2.00299e+06	2.81141e+06	2.20866e+06	1.34577e+06	3.15124e+06	2951604	5.61351e+06	3.11677e+06	20465564	1.62238e+06	6719205	1.65664e+06	3.50973e+06	3519017	720424	3859290	3.23208e+06	5903766	2.88823e+06	2.65729e+06	5172048	4.9861e+06	2579475	3183996	7861665	2.45676e+06	2.34855e+06	2.81016e+06	4.69643e+06	875738	3.20406e+06	2.0955e+06	3.36699e+06	10240507	4.93297e+06	6.01828e+06	1.65486e+06	2017221	4.99218e+06	4.20083e+06
P00491	PNP	Purine nucleoside phosphorylase	PNPH_HUMAN	31617	30824.6	26879.6	72579	21946.2	102387	94103.8	67250.8	36589.2	64536.4	23821.3	38698.8	26282.9	46777.8	12103.3	51518.7	16858.4	35282.3	32688.2	21233.5	27483.7	51792.7	8262.16	14213.4	72794.2	42900.1	19502.4	62784.6	85098.4	51049.6	124961	19344.4	16427.1	15260	36422.6	28152.5	173164	89293.6	53493.3	16133.4	72329.6	57018.4	73231.1	48099.9	115950	51575.8
P00492	HPRT1	Hypoxanthine-guanine phosphoribosyltransferase	HPRT_HUMAN	25973.5	13463.7	14884.2	14839.2	37784.8	27992.8	35226.5	21504.3	22026.1	54810	19608	21528.2	51781.4	39642.8	23661.9	43707.8	31212.3	56217.6	40904.1	34679.9	111229	23489	18274.9	14396.4	15760.5	33396.5	11731.9	45739.8	53448.3	20618.5	48276.5	23515	11753.8	14736.9	11399.4	31466	66912.3	44288.2	29272.1	32651.4	39132.2	57012.9	26440.9	18448.6	25720.7	27653
P00505	GOT2	Aspartate aminotransferase, mitochondrial	AATM_HUMAN	11883773	15004873	7.01926e+06	5.30901e+06	10752110	4.48679e+06	4.3446e+06	6368876	7.80763e+06	5.85477e+06	28617278	9906409	8595213	11492344	3390140	5.93739e+06	15558894	26174118	7.24933e+06	20687444	12379966	4316337	31931718	14113424	11615482	10492858	11632667	7.26382e+06	40500048	11344606	12709444	24598754	8207009	8800497	5490261	9745760	10082563	4945944	9297894	7234325	13885844	6061159	7156418	5.66386e+06	7.1799e+06	10147054
P00533	EGFR	Epidermal growth factor receptor	EGFR_HUMAN	78646.6	84065.2	68879	95492.2	124510	79287.4	70840.3	58463.9	120465	61057.6	68065.4	49565.6	47385.6	88003.7	69628.7	78251.5	96329.2	155154	74150.9	73533.4	60191.5	67182.7	73426.6	77600.2	99289.7	82439.7	111877	85100.3	77950	93241.9	64419.6	77407.5	77190.7	92385.5	95642.3	71672.1	54865.2	54623.8	99080.5	92663.9	88820.6	101945	60069.8	56453.9	82051.3	80400.5
P00558	PGK1	Phosphoglycerate kinase 1	PGK1_HUMAN	89793.9	66368.3	69646.9	200060	90703.8	267701	195164	100084	62622.3	161101	66221.2	77622.8	51447.6	111522	51238.2	77462.5	67916.5	129656	111168	50214.1	184200	92613.8	32876.5	37014.6	93650.2	99851.6	113709	128793	120966	95249.2	149041	63708.9	105576	40804.8	100235	81022.7	266500	102755	121641	66548.6	170000	129037	100448	139670	159538	93524
P00568	AK1	Adenylate kinase isoenzyme 1	KAD1_HUMAN	108305	50453.2	90783	106809	5221.81	171556	250901	96958.8	47080.4	131480	65944	92548.9	67947	125114	71365.1	81664.1	44237.8	39769.6	73297.8	72928.6	53495.1	69481.8	26449.7	32727.1	154978	113394	85560.7	132458	273037	118364	259538	117912	43634.4	38020.3	51683.1	95455.3	464970	85132.1	135130	16423.6	116737	82002.6	77785.6	38729.7	93917.7	92662.5
P00709	LALBA	Alpha-lactalbumin	LALBA_HUMAN	NaN	NaN	NaN	NaN	NaN	NaN	NaN	NaN	NaN	NaN	NaN	NaN	NaN	NaN	NaN	NaN	NaN	NaN	NaN	NaN	NaN	NaN	NaN	NaN	NaN	NaN	NaN	NaN	NaN	7969.79	1.03778	NaN	1.08332	NaN	NaN	NaN	1.07838	NaN	NaN	1	NaN	1.61184	NaN	NaN	NaN	NaN
P00734	F2	Prothrombin	THRB_HUMAN	23905256	23315940	19447832	26820434	17604978	15586392	19062924	18398802	43885756	17289682	8520926	16203206	22163764	22892682	30650932	17727610	19335630	18632428	14372262	19657000	15635430	19808258	19899038	17740032	20436058	22674634	19505716	29435964	23046070	35097252	21637440	23249498	24069140	21004942	23800632	24320258	19299098	19276816	24837716	24133480	27246226	34871928	17233888	22525692	33055704	28873250
P00736	C1R	Complement C1r subcomponent	C1R_HUMAN	33608492	27092290	26819986	21534402	18537786	17971140	29200068	24530768	15816287	24106646	23047552	19655772	19912958	36879912	18771978	35961020	6283908	26923814	27384034	30410298	17894776	28259628	30118912	26990462	30985400	39874932	31450608	18102308	27472330	25536986	31327480	30099614	27298308	28765670	30502752	29739412	25590948	32156862	37108920	35332760	28119288	25839414	30523712	40324016	19488204	26392084
P00738	HP	Haptoglobin	HPT_HUMAN	14938015	4.15524e+06	48757528	13162802	243003808	2.48221e+06	38494960	3.16451e+06	860593	12997155	19291320	6253205	13266280	16824106	9480502	24124556	3.67257e+06	209979824	8240635	17319588	7041037	8047432	6502288	8811191	4.37173e+06	18824440	9876833	8.36724e+06	21978062	81730400	15283683	7015145	25533464	9387042	7305374	38690464	9022389	4841622	14721608	1.33098e+06	4.56749e+06	12427148	240510832	21080140	3.61512e+06	3397217
P00739	HPR	Haptoglobin-related protein	HPTR_HUMAN	288767	259476	1.15677e+06	148889	4890284	161808	347286	183793	861265	383033	313080	89677.1	306674	369983	249148	1090106	123945	17787590	328272	351256	189790	414528	240228	119810	233782	392717	212423	138169	322608	2.83575e+06	83236.3	93050.8	153126	238507	151510	310579	74640.8	375833	259484	344027	306713	351088	982486	310053	132634	244752
P00740	F9	Coagulation factor IX	FA9_HUMAN	11964442	9725110	6.70487e+06	9579888	6.09172e+06	6.48049e+06	9288921	9775614	5.696e+06	10540929	3316777	6551048	8893706	13198774	10971755	10596923	3.4011e+06	6.99197e+06	8.27426e+06	7276161	8090647	8.3122e+06	8827904	10156928	7689355	13924610	9728100	10205649	11479826	8125022	8300130	8063888	8905502	9588333	9788275	11986853	9472320	8389335	12375411	8691522	9142067	11273704	8437076	12622958	7260237	9610575
P00742	F10	Coagulation factor X	FA10_HUMAN	14742171	15758981	10530205	16970446	12961265	9293041	13097543	11860626	8369829	12887307	10577864	14289037	7.16634e+06	15782662	13266793	17673188	2.83355e+06	14393291	10997284	13988405	6.09102e+06	15091980	20127784	16017339	16179206	17072060	12605766	10013114	20801520	18362328	13391282	15452360	14914809	17674558	19946424	13223524	16182680	11702269	18141528	15341861	19342422	14849748	13610050	13587658	12277171	15195461
P00746	CFD	Complement factor D	CFAD_HUMAN	360430	362841	876989	336372	1.6694e+06	625273	652906	632390	2.16806e+06	282698	814534	568931	777808	318695	396525	915604	766196	2.01565e+06	479537	446375	338617	633100	645370	808818	543025	324299	329758	325253	392342	809609	544378	501799	211555	318277	222312	280686	580754	723219	325864	382802	428528	211415	1103648	749881	543672	506585
P00747	PLG	Plasminogen	PLMN_HUMAN	138850464	156427328	94514456	138088288	103726592	112363576	94697024	112246256	64847736	98213048	117230376	122949528	125627112	151433312	185778112	110260632	145861680	105155752	113061648	119544744	94172632	113763384	132279600	127952216	121323512	178371792	175515408	125179960	160690784	136855728	116152376	136450192	128067072	145031008	174159776	142705264	83882184	94263200	155745840	133053392	130978128	156454944	94079288	106258024	99060880	102676176
P00748	F12	Coagulation factor XII	FA12_HUMAN	4350942	10207451	5385365	1.82748e+06	10854047	2.55595e+06	9487874	4.5088e+06	7440599	1.53876e+06	3706840	2.17166e+06	4360461	4271183	4.97646e+06	3.46692e+06	9919750	15605701	3.04334e+06	4525282	5151203	2.79089e+06	5251533	8.07432e+06	3.31688e+06	4.42747e+06	5566836	1.73571e+06	8399248	3.81425e+06	4.10221e+06	1951851	1535525	2.28754e+06	3.44407e+06	2.43932e+06	3.11182e+06	3.09964e+06	4500815	4.12517e+06	4.55335e+06	1.7215e+06	4845041	2409555	2317777	1.82735e+06
P00751	CFB	Complement factor B	CFAB_HUMAN	274839040	164025056	152699776	244892208	106980960	141218416	184282112	199259120	145992960	272860992	187711136	245173664	195261152	309849952	204755936	408473856	198063392	137665360	198194512	235941008	265785840	195196000	187616752	161970720	156211088	287376224	206493568	192883632	158452672	106894848	201484032	258121200	287067104	272807488	279664480	363392960	176771488	167423120	289949440	165193216	180788480	239233888	206019216	266860752	190061760	148781104
P00797	REN	Renin	RENI_HUMAN	NaN	1.81311	1	1.30707	1.23112	1.24128	NaN	269.019	NaN	1	NaN	NaN	1.05133	NaN	2.07499	1	NaN	NaN	1	NaN	1.19808	1	NaN	1	1.27012	1.49742	1.14764	1.6486	NaN	NaN	NaN	1.13403	4330.64	NaN	NaN	1.08169	1.07838	1	NaN	1	NaN	1.61184	1	1457.53	NaN	1.31998
P00813	ADA	Adenosine deaminase	ADA_HUMAN	1.39363	7230.21	7079.8	NaN	NaN	7351.37	3260.6	NaN	7933.63	NaN	2547.45	5717.12	2330.15	5768.29	NaN	4698.46	5282.4	NaN	NaN	NaN	24643.3	NaN	3320.07	4976.99	9447.23	NaN	6321.73	5759.86	6417.96	NaN	5200.07	8301.52	5648.63	8885.97	5362.17	NaN	NaN	2763.55	NaN	5457.9	8899.73	8983.2	5005.06	8382.54	8999.66	5424.14
P00915	CA1	Carbonic anhydrase 1	CAH1_HUMAN	3.33658e+06	751676	1787391	2519370	441711	2971325	5507277	3.09321e+06	1.59966e+06	4793446	2.06787e+06	1925862	1.28053e+06	3.11735e+06	2.40432e+06	2872774	3.23306e+06	1.2551e+06	2140172	2.06734e+06	1.93953e+06	2.3635e+06	1.39178e+06	913258	3.75501e+06	3.12117e+06	2.35905e+06	5185953	7106461	2.88146e+06	4.14909e+06	3.83339e+06	1.38875e+06	1.92638e+06	1.17653e+06	2571501	16500491	1.85578e+06	3404332	800149	2.44074e+06	3.87123e+06	4871769	1.93643e+06	1.86603e+06	2.46112e+06
P00918	CA2	Carbonic anhydrase 2	CAH2_HUMAN	3.21345e+06	806787	1.22886e+06	2.29856e+06	294490	2.32523e+06	4102796	2.08099e+06	579840	4.11071e+06	1.51958e+06	1795697	1.5265e+06	3.32407e+06	1.52377e+06	1834827	1291494	1.47235e+06	1.51691e+06	1515094	1.26989e+06	1.66808e+06	991607	770114	2651982	3.26587e+06	1.58103e+06	3869745	4.06023e+06	1.81843e+06	3845072	2.18941e+06	978667	1.10715e+06	683075	2340207	10035364	1179727	2.98074e+06	401841	1.72382e+06	2.67935e+06	2.83411e+06	1.47366e+06	1.54486e+06	1.54467e+06
P00966	ASS1	Argininosuccinate synthase	ASSY_HUMAN	NaN	NaN	4909.76	NaN	NaN	NaN	NaN	NaN	NaN	NaN	NaN	16734.5	NaN	NaN	5178.7	NaN	NaN	NaN	NaN	1	2036.57	1	NaN	1	15794.2	NaN	NaN	NaN	NaN	NaN	NaN	1.13404	1.08332	NaN	NaN	NaN	NaN	30353.6	NaN	10090.9	NaN	NaN	NaN	1.03556	NaN	NaN
P00995	SPINK1	Serine protease inhibitor Kazal-type 1	ISK1_HUMAN	62824.9	14016.9	46051.9	29900.3	16052.4	28410.4	21196.6	30519.6	75375.7	33271.5	45940.3	50149.6	NaN	44726.1	28777.6	24861.3	114062	NaN	73436.1	48891.4	46271.8	60429.4	52904.2	26170.2	74908.5	22639.8	76398.2	38555.1	39446.5	35166.2	78723.9	66582.2	44988.5	33202.8	35619.9	37170.9	139807	26697.9	24785.8	79252.1	42865	91383.8	53382.3	128301	1.65533	75050.4
P01008	SERPINC1	Antithrombin-III	ANT3_HUMAN	284441920	273811520	176638240	297017152	150918112	214139568	161904688	205743344	177636864	170845200	222323040	177413184	189140816	314899616	293237280	219895744	353735552	147534512	190754160	181913088	148131104	201832336	229157488	203823552	247504160	313591872	270417632	268192880	318375200	219525104	212761200	197846448	247863984	269784256	249661872	244522736	197052752	185423504	270943616	229017856	215140240	337229696	191031328	217458112	213228128	205821760
P01009	SERPINA1	Alpha-1-antitrypsin	A1AT_HUMAN	43087088	47639096	48082256	16599874	70282048	21053840	44434524	37719008	80515552	54904528	7072165	23558878	31789990	37827728	19456386	27369972	56522240	74127888	25736452	24364516	174341312	30031316	24825484	11115907	15855426	43990684	16109933	8810072	7.34575e+06	29229812	60033704	21454432	33898516	21597336	15573661	33032228	19600538	26159226	40399096	28055610	22128154	39784068	37340120	25907774	41362676	28096846
P01011	SERPINA3	Alpha-1-antichymotrypsin	AACT_HUMAN	374568000	268411728	208311456	259157744	169234608	193482608	210310448	230130944	159155264	388822240	236803088	205084960	209800320	446466752	282851456	381018560	662866560	195789728	286027264	306480160	313938848	270099648	267897088	239757584	242729136	508133056	317373632	281588704	410974208	191660416	261148992	241719616	397161664	326868192	375782080	512739040	253914528	255627232	384976896	238619248	237811856	463509760	309755456	376306944	240368704	215262336
P01019	AGT	Angiotensinogen	ANGT_HUMAN	115377984	117592016	68992904	84160192	71901488	80322712	68311216	78181528	49294880	89799888	61675664	57143216	68085832	110269768	90308936	97187224	93242976	107465696	78269672	67591664	67530064	84916016	88704680	120967064	75476616	124719200	76621152	75245008	150348992	87693776	74522712	83379104	91468608	107502272	108429072	123980792	100575640	82095808	108146216	97437272	80764376	128208776	61771076	111527344	66017580	81680368
P01023	A2M	Alpha-2-macroglobulin	A2MG_HUMAN	8.04415e+06	9051782	17896480	7540325	143030176	5051386	6.46514e+06	7.9744e+06	12063022	8520699	9441876	12022267	6.64135e+06	8.34477e+06	4.60366e+06	3.33877e+06	15296330	108771112	6.34031e+06	9649769	5099372	6268030	7937913	3.99165e+06	4.15221e+06	9476954	4.13835e+06	6.32202e+06	5686603	29926976	6.33549e+06	6.17943e+06	7660452	8881389	9303364	11386222	4.29106e+06	8968442	8447872	8.0763e+06	6.86904e+06	9859317	20863650	7.75487e+06	5394189	8797049
P01024	C3	Complement C3	CO3_HUMAN	522396064	370737120	369968000	590959104	297448384	317157664	346601472	407730016	253802864	435180512	443368800	426840224	389724192	548960000	502434048	599496832	274466912	417812704	401590368	466864928	332357760	411856032	484479424	403976928	477848832	509355648	428971808	451656928	475774720	389979936	421954176	388558784	486033184	492668640	452988928	559573952	426888480	500253152	516209088	476576512	416713952	524542688	407039168	573017088	370358144	438672192
P01031	C5	Complement C5	CO5_HUMAN	69161856	51824232	45805168	73516104	23504302	56141660	53076496	59249364	57431860	51599016	52319280	59693820	54608332	67537808	55610072	64983552	35446168	32738840	50942968	59043488	56967964	53079184	55793924	49842516	48885728	76359224	71022232	55838288	71494152	48480376	48391928	64590060	57364420	69236624	53748252	67461776	58582312	48741880	68257856	55235548	50946580	70864320	52055304	82049248	49911264	42711480
P01033	TIMP1	Metalloproteinase inhibitor 1	TIMP1_HUMAN	803539	792773	525183	461870	322061	1.06396e+06	416262	613646	345583	843468	513903	757915	392766	837152	487967	438013	988758	219629	587387	465619	3.4389e+06	644042	519683	348852	431099	878587	655700	502913	523423	202310	695410	484708	656909	874567	603945	364711	633519	444113	865048	457148	639757	1.01146e+06	642068	540421	671644	849374
P01034	CST3	Cystatin-C	CYTC_HUMAN	2614541	2302197	2.00716e+06	2.12978e+06	1736739	2.21271e+06	1.64291e+06	3.43883e+06	2.96433e+06	1999972	2.12368e+06	3.35895e+06	3.06343e+06	3.04443e+06	2.79201e+06	1.95972e+06	3650637	2.83808e+06	2.38211e+06	1.77118e+06	1.60065e+06	2.55071e+06	2.56217e+06	1.44381e+06	2.33313e+06	3.36268e+06	2358305	3811811	3.16888e+06	1.93932e+06	2.11246e+06	1.67167e+06	1.52085e+06	2.28628e+06	1.90089e+06	1.5788e+06	3.88641e+06	1.61865e+06	2.93933e+06	3.79823e+06	1.80206e+06	2.43306e+06	2.80622e+06	4067113	2.97638e+06	2276657
P01036	CST4	Cystatin-S	CYTS_HUMAN	84510.5	46040	17807.7	NaN	NaN	27290.4	NaN	25437	NaN	149208	NaN	47437.8	NaN	57240.6	NaN	NaN	283645	NaN	54119.1	NaN	41556.9	22368.4	73639.5	NaN	39214.4	46310.9	80504.1	NaN	NaN	NaN	42733	46393	122300	102470	27730.9	NaN	31171.9	51729.7	84940.9	1	39449.9	56476.2	42348	28431.1	4921.98	NaN
P01037	CST1	Cystatin-SN	CYTN_HUMAN	NaN	NaN	NaN	NaN	NaN	NaN	NaN	NaN	NaN	57150.8	NaN	NaN	NaN	NaN	NaN	NaN	NaN	NaN	8264.71	NaN	NaN	NaN	NaN	NaN	NaN	NaN	NaN	NaN	NaN	NaN	NaN	NaN	42702.5	NaN	NaN	NaN	NaN	NaN	NaN	NaN	NaN	NaN	NaN	NaN	NaN	9530.55
P01040	CSTA	Cystatin-A	CYTA_HUMAN	NaN	NaN	1014.42	2165.18	NaN	NaN	8965.96	123800	41531.6	NaN	1095.77	1591.11	5881.45	11315.8	27106.8	NaN	14712.6	89597.3	33010.3	7587	16825.8	NaN	6515.18	130716	NaN	5281.08	24908.1	18565	6119.8	NaN	12364	NaN	NaN	19860	NaN	NaN	2119.08	618623	NaN	NaN	1.14119	15321.4	27946.5	1329.25	2935.47	21584.9
P01042	KNG1	Kininogen-1	KNG1_HUMAN	156793360	192217088	127207744	151916608	130229968	119985056	115968080	196928864	138486304	117905592	143770496	155398544	124341480	158393888	150491536	178194112	87745952	150833280	124502928	121365744	107237576	129393656	153782752	123197072	144935328	164051424	150530128	105896432	131915176	138899920	117240880	125498888	120845256	117496496	178117200	111522160	136771984	127477216	162252448	154014112	151699472	108891984	134061520	147505520	120691192	128634320
P01130	LDLR	Low-density lipoprotein receptor	LDLR_HUMAN	64995.5	74363.3	59690.2	164111	7965.15	86830.7	73920.3	53679.2	21776.8	42187.5	239200	90434.9	92470.6	106354	152477	42937.9	43035.9	26492.1	50345	69261	89994.7	89838	105386	88018.2	91621.5	129340	42597.2	36213.3	109926	6638.54	84661.6	52926.3	19622.3	16484.4	49212.5	14409	81782.8	53740.2	60099.1	105698	32523.6	74612.4	88014.2	76761.3	36264.2	135922
P01133	EGF	Pro-epidermal growth factor	EGF_HUMAN	NaN	3188.53	NaN	NaN	NaN	NaN	NaN	334.445	NaN	NaN	NaN	NaN	NaN	NaN	NaN	NaN	NaN	NaN	NaN	NaN	NaN	NaN	NaN	NaN	670.258	4076.15	NaN	NaN	NaN	NaN	NaN	NaN	NaN	NaN	NaN	NaN	NaN	NaN	NaN	NaN	NaN	NaN	NaN	NaN	NaN	NaN
P01137	TGFB1	Transforming growth factor beta-1 proprotein	TGFB1_HUMAN	2994.23	42380.4	1810.49	67493.3	NaN	112815	60230.8	15945.6	44829.3	60304.6	3228.28	3262.53	NaN	73840.7	89231.9	139008	9183.78	5107.74	7118.74	417294	11698.7	4265.09	39521.7	46761.5	52089.3	100769	NaN	1.6486	127692	NaN	NaN	51688.1	12669.6	5352.39	71931.4	4036.1	NaN	1642.9	10358.9	5954.02	57765.7	33819.4	37974.4	57555	37938.4	34860.6
P01138	NGF	Beta-nerve growth factor	NGF_HUMAN	1.63641e+06	830322	1.05714e+06	1.42225e+06	429842	1.39561e+06	852252	715407	NaN	536813	1.9618e+06	2424990	930777	1.14839e+06	5917337	736919	8.15914e+06	1.49059e+06	2.25774e+06	3.47149e+06	1.36148e+06	2.7572e+06	952730	2.85652e+06	1.92865e+06	2.95059e+06	1.0152e+06	932878	4.8797e+06	883798	1.57228e+06	1.95123e+06	997210	3.31754e+06	2.07632e+06	2.13525e+06	1.21688e+06	876485	2.92027e+06	1312318	1.96195e+06	837518	NaN	802634	1.23481e+06	3.98853e+06
P01160	NPPA	Natriuretic peptides A	ANF_HUMAN	NaN	NaN	NaN	NaN	NaN	NaN	NaN	NaN	NaN	30631.2	1	80280.8	13376.6	NaN	21103.7	NaN	NaN	NaN	NaN	NaN	9429.95	NaN	1.04106	NaN	NaN	NaN	NaN	17789.1	NaN	NaN	NaN	NaN	NaN	NaN	NaN	NaN	7659.81	NaN	NaN	NaN	NaN	NaN	1	10449.8	47069.1	10015.4
P01185	AVP	Vasopressin-neurophysin 2-copeptin	NEU2_HUMAN	NaN	NaN	NaN	NaN	NaN	NaN	NaN	NaN	NaN	NaN	NaN	NaN	NaN	NaN	NaN	NaN	NaN	NaN	NaN	NaN	NaN	NaN	NaN	NaN	NaN	NaN	NaN	NaN	NaN	NaN	NaN	NaN	NaN	NaN	NaN	NaN	NaN	NaN	NaN	NaN	NaN	NaN	NaN	NaN	NaN	NaN
P01225	FSHB	Follitropin subunit beta	FSHB_HUMAN	4579.43	NaN	NaN	NaN	NaN	NaN	16013.5	NaN	NaN	16242.1	12830	NaN	NaN	NaN	NaN	NaN	NaN	NaN	2511.8	5375.59	NaN	7286.04	31577.9	14945.3	NaN	NaN	NaN	NaN	NaN	NaN	11120.6	NaN	12509.1	14207.7	4680.08	NaN	13173.5	5429.24	10315.3	16137.8	NaN	NaN	10181.7	NaN	NaN	7323.51
P01236	PRL	Prolactin	PRL_HUMAN	NaN	NaN	2274.53	NaN	NaN	NaN	1384.36	579.396	NaN	3329.41	NaN	NaN	NaN	NaN	NaN	6124.31	NaN	NaN	12490.7	9583.03	NaN	4317.73	NaN	1663.96	NaN	NaN	NaN	NaN	7905.13	NaN	NaN	NaN	2347.69	NaN	NaN	NaN	11349.9	NaN	NaN	NaN	5768.14	NaN	NaN	5067.87	NaN	5003.98
P01241	GH1	Somatotropin	SOMA_HUMAN	NaN	NaN	NaN	NaN	NaN	NaN	NaN	NaN	NaN	NaN	NaN	5968.2	NaN	NaN	NaN	NaN	NaN	NaN	NaN	NaN	11817.9	NaN	NaN	NaN	NaN	NaN	NaN	NaN	NaN	NaN	NaN	NaN	NaN	NaN	NaN	NaN	NaN	NaN	NaN	NaN	NaN	1.61184	NaN	NaN	NaN	NaN
P01266	TG	Thyroglobulin	THYG_HUMAN	126789	1150548	274706	144970	NaN	32169.7	50962.2	37814.5	3.07927e+06	111914	42853	NaN	5967.07	NaN	NaN	1.46211e+06	3095.27	173555	828710	985476	217704	837681	NaN	NaN	NaN	299089	3538339	30478.2	48098	362737	63075.8	880197	69261.8	906430	1.21629	1.31515e+06	30068	41130.5	1.5337e+06	24143.6	100245	3334.95	27392.4	24571	993033	7773.3
P01344	IGF2	Insulin-like growth factor II	IGF2_HUMAN	410058	1.18974e+06	834455	689266	1.66889e+06	651234	752119	1.08011e+06	1.23812e+06	403035	813679	274797	1.39834e+06	545487	1.6343e+06	681759	1.20124e+06	926224	849587	477489	555985	557846	793205	1.76344e+06	1.18138e+06	486801	1.11353e+06	681720	791579	1.23225e+06	501295	626590	457190	495892	662134	759098	893539	755440	606876	398221	726905	383524	905890	504241	638135	625876
P01589	IL2RA	Interleukin-2 receptor subunit alpha	IL2RA_HUMAN	1.39363	NaN	NaN	NaN	NaN	NaN	NaN	NaN	NaN	5766.11	NaN	NaN	NaN	NaN	NaN	NaN	NaN	NaN	1756.24	NaN	NaN	1	NaN	NaN	NaN	NaN	NaN	1.64861	NaN	NaN	NaN	NaN	NaN	NaN	NaN	NaN	1.07838	NaN	3023.53	6986.32	NaN	NaN	NaN	8499.13	NaN	NaN
P01591	JCHAIN	Immunoglobulin J chain	IGJ_HUMAN	1.21498e+06	1201153	5.38619e+06	585864	32573022	1.43261e+06	1.5376e+06	311995	3513815	1.14242e+06	1.25283e+06	1.01359e+06	949743	1.50191e+06	1.20233e+06	1.3873e+06	8494211	69757200	1.28704e+06	751830	503614	1.31643e+06	1.0445e+06	1.11062e+06	2.05112e+06	1.50571e+06	1.83619e+06	2021682	1.97218e+06	12934925	978698	868754	1.60682e+06	21476700	1.38996e+06	2.33436e+06	455926	795441	1271590	2.90517e+06	1.33265e+06	1.34628e+06	7.7994e+06	702620	2.05337e+06	648440
P01593;P01594	IGKV1D-33;IGKV1-33	Immunoglobulin kappa variable 1D-33;Immunoglobulin kappa variable 1-33	KVD33_HUMAN;KV133_HUMAN	180759	62406	310961	88232.3	4241730	102928	94027.6	47506.1	243064	80384.2	162290	401002	137312	176418	236800	285099	42221.8	2.72794e+06	88964.1	82912.2	16717	61140	84174.5	61602.4	67947.6	143484	235979	174514	63042	700890	161440	74698.6	271177	118272	89586.6	37137.2	40964.3	108467	156232	108939	41887.9	240918	359536	186399	138561	187789
P01597;P04432	IGKV1-39;IGKV1D-39	Immunoglobulin kappa variable 1-39;Immunoglobulin kappa variable 1D-39	KV139_HUMAN;KVD39_HUMAN	12403.4	NaN	103782	16721.7	NaN	NaN	59921.5	NaN	109690	NaN	14029.1	60320.7	NaN	NaN	5601.76	81210.4	NaN	NaN	26928.7	NaN	NaN	40644.4	NaN	19247.7	NaN	NaN	NaN	NaN	19974.5	NaN	NaN	NaN	218534	NaN	4465.74	66508.1	1.07838	29756.4	NaN	NaN	1.14119	NaN	279798	36686.3	4784.75	NaN
P01599	IGKV1-17	Immunoglobulin kappa variable 1-17	KV117_HUMAN	106433	126648	516572	174575	980323	163109	198192	105148	723759	124313	99999.8	122274	221400	104689	153556	208465	104538	4591833	129611	61451	12980	142836	127471	104332	149260	159136	80688.2	242723	158293	433242	28405.2	172049	817379	115469	52108.5	87125.9	24359.1	85922.8	311304	691656	32271.8	116850	515351	139284	450252	61624.8
P01601	IGKV1D-16	Immunoglobulin kappa variable 1D-16	KVD16_HUMAN	NaN	NaN	36277.9	NaN	235619	1.24128	NaN	NaN	82650.2	22412.3	18390.8	124860	36351	NaN	NaN	NaN	NaN	134670	1	NaN	NaN	7987.59	NaN	NaN	NaN	NaN	NaN	31954.2	NaN	114782	NaN	1.13404	12399.7	NaN	21463	NaN	NaN	1	NaN	NaN	26395.9	11412.3	15627	1.03556	13418.4	8624.62
P01602	IGKV1-5	Immunoglobulin kappa variable 1-5	KV105_HUMAN	250602	410408	495067	315205	2.39146e+06	777418	226030	173197	614653	497315	349797	568611	435031	570846	578421	309151	552705	4.44958e+06	129841	518012	161013	252425	423823	313251	438849	547637	577068	285603	367344	745177	113609	275470	816938	71852.1	457231	292143	186731	1	519268	236958	123720	282579	18968.7	179262	292241	299185
P01619	IGKV3-20	Immunoglobulin kappa variable 3-20	KV320_HUMAN	1.27459e+06	986416	3.24174e+06	615756	21843168	1.5179e+06	1.03445e+06	1248654	4220350	929621	1.7794e+06	1.62741e+06	1.30932e+06	1.46229e+06	1.44406e+06	1.53183e+06	1.19403e+06	28929884	1.28839e+06	1.18832e+06	614664	915322	1.01179e+06	1.26128e+06	1.66981e+06	1.40378e+06	1.97443e+06	2.09161e+06	2.07048e+06	8317694	631884	1.55383e+06	4605135	500037	968443	1.0422e+06	635314	908462	1.30256e+06	1.3706e+06	694129	1.49154e+06	1923897	1.01989e+06	1.33149e+06	776364
P01699	IGLV1-44	Immunoglobulin lambda variable 1-44	LV144_HUMAN	14354.6	1.81311	37724.9	NaN	359715	NaN	3380.13	1.21511	33285	18935.8	NaN	22153.3	14940.4	1.4883	41097.4	44747.6	NaN	317992	44896.7	5917.76	12462.1	20209.1	12810.6	26327.3	25031.5	NaN	24895.6	56242.6	34581	125692	7514.16	14773.5	117685	15006.3	12274.3	5885.73	1.07838	16272.6	16119.2	NaN	9742.51	5169.72	64543	32415.9	5969.06	7514.24
P01700	IGLV1-47	Immunoglobulin lambda variable 1-47	LV147_HUMAN	473395	385739	1.26517e+06	182190	1238439	150475	285930	311006	2.11639e+06	478920	133574	677041	591659	433773	597546	466854	417391	1.44296e+06	332958	256890	193566	341031	256240	405363	496563	291853	440402	538895	545958	339434	176320	424375	955413	67057.1	104881	NaN	247340	346202	527923	671760	415306	598403	897375	731794	661137	548495
P01701	IGLV1-51	Immunoglobulin lambda variable 1-51	LV151_HUMAN	371477	577275	1.01483e+06	222318	917783	128500	419806	238175	669358	408375	107296	249812	761734	209681	NaN	527566	55837.8	2.06897e+06	163663	317407	743351	261749	158521	784479	196852	405425	639902	603338	305090	2591775	212236	231792	715684	NaN	252659	57775.8	83580.9	612011	419693	311565	87199.2	485609	1.41624e+06	817558	493747	229568
P01703	IGLV1-40	Immunoglobulin lambda variable 1-40	LV140_HUMAN	112981	84064	331650	67818.5	298658	43855	143502	45309.5	146620	58148.4	47433.2	356380	80845.1	124885	199760	118793	210732	2.28043e+06	96877.3	46503.3	31583.2	69453.3	68390.4	191723	254177	147764	136259	235813	96060.9	328481	125322	166548	196163	36376.6	70906.2	163528	43521.2	105393	77528.7	45972.4	59498.1	107737	317026	104184	76786.3	64797.1
P01705	IGLV2-23	Immunoglobulin lambda variable 2-23	LV223_HUMAN	NaN	645353	133011	NaN	85264.3	NaN	54605.8	NaN	31575	34335.8	NaN	NaN	84884.9	NaN	NaN	NaN	NaN	NaN	175477	NaN	603604	NaN	NaN	331799	NaN	NaN	NaN	NaN	482165	NaN	NaN	NaN	NaN	NaN	95804.3	NaN	NaN	26998.2	NaN	10727.1	537465	418604	209005	NaN	NaN	NaN
P01706	IGLV2-11	Immunoglobulin lambda variable 2-11	LV211_HUMAN	NaN	47323.6	211523	NaN	177422	NaN	NaN	NaN	258173	NaN	NaN	NaN	50957.7	NaN	NaN	NaN	NaN	1.14399e+06	18192.7	1	17561.7	NaN	71934.4	69393.5	20372.4	NaN	479672	85236	NaN	537682	6520.67	31792.3	115881	NaN	105232	165893	NaN	11439.3	NaN	39974.1	4592.26	17182.6	22173.5	NaN	NaN	NaN
P01709	IGLV2-8	Immunoglobulin lambda variable 2-8	LV208_HUMAN	NaN	NaN	24075.5	NaN	258454	5408.36	9199.88	NaN	NaN	NaN	NaN	NaN	24447.6	58358	NaN	106470	NaN	673278	NaN	NaN	NaN	41235.1	NaN	5666.57	NaN	NaN	261380	102867	62790.2	99556.2	83214	78964.9	43561.6	NaN	61110.1	386758	NaN	NaN	81114	49523.5	NaN	NaN	NaN	48129.4	15000.9	53202.7
P01714	IGLV3-19	Immunoglobulin lambda variable 3-19	LV319_HUMAN	110608	75165.5	238517	129447	1.6915e+06	26136.4	69530.5	127570	129400	180757	183701	78147.7	233682	107213	164078	55039	83855.7	1427093	97864.5	38277.7	141056	63046.9	30253.9	100125	180418	111944	171578	151914	84336	801459	62835.6	124903	596292	38295.7	84666.6	72626.8	29016.9	71382.2	111371	215156	54532.2	127419	420563	173989	125613	42154.6
P01715	IGLV3-1	Immunoglobulin lambda variable 3-1	LV301_HUMAN	NaN	NaN	7894.69	NaN	128845	NaN	NaN	NaN	NaN	NaN	NaN	NaN	NaN	NaN	NaN	NaN	NaN	77330.6	NaN	NaN	NaN	NaN	NaN	NaN	NaN	NaN	NaN	NaN	NaN	44799.4	NaN	NaN	1.08332	NaN	NaN	NaN	NaN	NaN	NaN	NaN	NaN	NaN	12542.9	NaN	NaN	NaN
P01717	IGLV3-25	Immunoglobulin lambda variable 3-25	LV325_HUMAN	215648	121376	349804	128306	1.50018e+06	45115.5	164803	70724.3	219876	61677.6	155304	189024	261138	177374	233237	84657.8	125313	3439622	101446	196138	86342.6	112051	113848	74935.6	411916	235057	321964	355270	229426	1.15013e+06	188957	125780	488547	120272	104291	151952	69756.4	79467.3	178310	290110	106183	189219	291725	196500	215763	32695.6
P01718	IGLV3-27	Immunoglobulin lambda variable 3-27	LV327_HUMAN	1.39363	64922.1	46516	NaN	257350	10871.4	4151.47	NaN	37866.5	11237.5	12133.9	NaN	16307.4	18829.9	NaN	63868.9	NaN	1.54394e+06	NaN	4287.52	NaN	1	6221.96	NaN	27685.4	16006.9	17557.2	17321.9	16491.1	128652	9515.97	39247.2	75396	NaN	1.2163	9778.25	NaN	3717.83	10077.6	71875.1	11072.3	9318.72	69093.4	42102.5	38853.7	10563.8
P01721	IGLV6-57	Immunoglobulin lambda variable 6-57	LV657_HUMAN	105043	32155.5	157975	69138.4	682532	26469	47355.4	1.21511	94867.6	190413	55390.9	108092	382275	78482.1	168817	23501.7	24147.6	3.12276e+06	81058.8	53096.9	14447.1	44816.6	14155.7	17168.7	126565	119134	93791.8	369495	1.27138	225210	97500.5	108032	233267	24335.4	36670.7	41579.7	42448.4	1	108014	181536	16925.2	101920	339244	180162	373384	120569
P01730	CD4	T-cell surface glycoprotein CD4	CD4_HUMAN	595033	613588	632086	779986	506734	400275	532712	766593	1.10328e+06	427252	416538	212578	137260	817386	208436	534633	134998	820860	384382	592492	322718	624472	517653	381127	489320	963131	656306	320034	880416	491073	726700	434095	765012	568559	764131	887459	432619	436958	760998	741658	433245	401068	471314	607291	310016	427189
P01732	CD8A	T-cell surface glycoprotein CD8 alpha chain	CD8A_HUMAN	NaN	NaN	NaN	NaN	NaN	NaN	NaN	NaN	NaN	NaN	NaN	NaN	NaN	NaN	NaN	NaN	NaN	NaN	NaN	NaN	NaN	NaN	NaN	NaN	NaN	NaN	NaN	NaN	NaN	NaN	NaN	NaN	NaN	NaN	NaN	NaN	NaN	NaN	NaN	NaN	NaN	NaN	NaN	NaN	NaN	NaN
P01742	IGHV1-69	Immunoglobulin heavy variable 1-69	HV169_HUMAN	71956.1	38085.4	195560	75350.9	374555	41759.2	120783	61602	201366	61020.9	129995	92224.6	162879	76846.3	254019	72074	315592	1.2881e+06	63047.9	42142.4	62301.2	60130.8	60819	64577.2	73305.6	41018.7	128671	325718	177111	533498	54096.1	78018.5	894539	14348.2	88903.3	50862.3	9605.44	55636.2	98160.8	22867.4	51555	137903	74243.2	243571	115479	76367.1
P01743	IGHV1-46	Immunoglobulin heavy variable 1-46	HV146_HUMAN	NaN	17512.8	46545.9	7238.11	176636	12048.4	4850.82	NaN	68793.1	NaN	21081.9	11710.3	9381.56	8902.38	22395.4	22095	NaN	17000	18516.2	7128.25	NaN	3156.52	NaN	9888.09	16393.5	7259.2	10054.4	6294.04	5021.67	20419.4	6947.17	14107.1	32077.8	5294.21	11810	NaN	5788.79	NaN	NaN	15234.2	5668.34	15359.2	25664	18209	NaN	1.31998
P01763	IGHV3-48	Immunoglobulin heavy variable 3-48	HV348_HUMAN	NaN	NaN	NaN	NaN	NaN	NaN	NaN	NaN	NaN	NaN	NaN	NaN	NaN	NaN	NaN	NaN	NaN	NaN	NaN	NaN	NaN	NaN	NaN	NaN	NaN	NaN	NaN	NaN	NaN	NaN	NaN	NaN	6157.44	NaN	NaN	NaN	NaN	NaN	NaN	NaN	NaN	NaN	NaN	NaN	NaN	NaN
P01764	IGHV3-23	Immunoglobulin heavy variable 3-23	HV323_HUMAN	NaN	NaN	NaN	NaN	NaN	NaN	NaN	NaN	NaN	NaN	NaN	NaN	NaN	NaN	NaN	NaN	NaN	NaN	NaN	NaN	NaN	NaN	NaN	NaN	NaN	NaN	NaN	NaN	NaN	NaN	NaN	NaN	NaN	NaN	NaN	NaN	NaN	NaN	NaN	NaN	NaN	NaN	NaN	NaN	NaN	NaN
P01766	IGHV3-13	Immunoglobulin heavy variable 3-13	HV313_HUMAN	NaN	NaN	NaN	30002.3	30908.6	NaN	NaN	NaN	9607.94	1	NaN	1892.85	NaN	NaN	NaN	1	NaN	165800	5118.02	NaN	NaN	NaN	NaN	NaN	NaN	NaN	NaN	27782.6	NaN	40401.7	NaN	NaN	10489.4	NaN	NaN	NaN	NaN	1	NaN	NaN	NaN	NaN	27958	1.03557	NaN	NaN
P01780	IGHV3-7	Immunoglobulin heavy variable 3-7	HV307_HUMAN	707716	876317	1.65597e+06	358680	9525456	381001	322529	465387	3761732	390194	735687	462552	683127	933026	779790	1.26936e+06	830484	44971472	672673	477397	245797	577865	589029	863632	1.05176e+06	889873	661843	1.01821e+06	783849	6.53209e+06	210963	960006	2132885	363351	403641	649726	191635	632292	841995	768342	535924	771207	2.33702e+06	965598	873991	353218
P01782	IGHV3-9	Immunoglobulin heavy variable 3-9	HV309_HUMAN	1.03758e+06	59297.7	219155	32376.8	372210	63219.6	58354.6	91745.2	917082	59286.1	263519	89032.1	157020	845625	188960	43169.7	113958	7676028	185673	39544.7	122165	72339.7	119489	172851	71696.8	529230	100433	296230	102084	1.13368e+06	22583.6	54910	410087	99230.8	111104	76087.5	165720	81505.8	924443	17981.4	115383	202069	427532	57589.7	112709	146160
P01814	IGHV2-70	Immunoglobulin heavy variable 2-70	HV270_HUMAN	16696.6	5678.25	17875.6	9514.92	140637	NaN	11103.3	14262.8	NaN	16534.7	10532.9	57466.4	27799.1	11727.3	NaN	4403.76	NaN	140602	5313.92	3734.96	5885.02	1	NaN	10827.9	9300.72	15685.8	6245.01	41991	45703.6	60824	20869.3	11784.6	28615.5	NaN	NaN	39438.1	NaN	NaN	11552.5	4004.19	1.14119	18808.6	3533.58	NaN	NaN	NaN
P01817	IGHV2-5	Immunoglobulin heavy variable 2-5	HV205_HUMAN	1.39363	NaN	40410.2	NaN	339202	NaN	NaN	NaN	89620.1	1	16506.9	10022	NaN	NaN	NaN	NaN	NaN	5.86497e+06	NaN	NaN	NaN	6643.69	NaN	NaN	NaN	35898.3	NaN	4815.36	NaN	242923	8352.49	1.13403	38500.9	NaN	NaN	NaN	NaN	9065.84	NaN	NaN	NaN	NaN	168050	20150.4	NaN	NaN
P01833	PIGR	Polymeric immunoglobulin receptor	PIGR_HUMAN	75623.8	71261.9	246294	13605	447074	41927.5	11654.7	80865.3	312939	49580.7	35516.9	103249	24577.5	81494.3	36077.8	13925.1	88049.1	1.70924e+06	37324.4	18878.4	40946.8	46168.4	19678.7	69756	39506	63976	3.15348e+06	80131.8	131221	558456	85700.4	17457.5	32089.9	775429	18831	14600.1	18910.6	8160.85	79614.3	28661.6	39796.9	57327.5	203071	8798.86	18447.8	20175.2
P01834	IGKC	Immunoglobulin kappa constant	IGKC_HUMAN	6.7757e+06	5.75406e+06	26516746	8938907	156276608	25178842	4993353	7130065	33240442	11479900	12394648	7.4564e+06	7816021	12506304	8887554	9974247	29849318	261364832	12939678	7399835	2.38122e+06	11702776	7.87439e+06	4633075	10082062	6.8254e+06	10393378	31172500	10362985	55129124	7371187	18212064	21942514	75991936	5.34432e+06	7309865	7.55577e+06	11870813	11856852	11429508	9228003	15661904	11787258	8599898	8761384	8388682
P01854	IGHE	Immunoglobulin heavy constant epsilon	IGHE_HUMAN	NaN	NaN	NaN	NaN	30783.6	24788.2	NaN	NaN	NaN	NaN	NaN	40996.5	NaN	NaN	NaN	NaN	NaN	NaN	NaN	4819.46	NaN	NaN	NaN	NaN	34866.3	NaN	NaN	NaN	NaN	NaN	NaN	NaN	NaN	NaN	NaN	1.08169	NaN	NaN	NaN	48148	NaN	NaN	15379.6	NaN	NaN	NaN
P01857	IGHG1	Immunoglobulin heavy constant gamma 1	IGHG1_HUMAN	7.24532e+06	6384838	16977908	2564931	122116416	46913864	7895760	10984470	15395836	6910926	5.64991e+06	10724220	9418770	7349240	6134440	7.39159e+06	6.46921e+06	339799872	5405300	5752531	2.54085e+06	5786119	3.96498e+06	5.40581e+06	7001778	7324415	13338219	11752208	7672470	50743040	2.96784e+06	9401042	32265088	2988674	3042759	5.19939e+06	5.00975e+06	5914525	6.84683e+06	8247646	6.82418e+06	6234733	11066933	6.49468e+06	5464742	5284726
P01859	IGHG2	Immunoglobulin heavy constant gamma 2	IGHG2_HUMAN	6.81308e+06	2.68778e+06	19535070	4887185	254567936	9098082	4403181	20291024	58360760	7313095	4.74052e+06	640692	18143786	7238439	6.0762e+06	9524337	7321431	453879008	8.097e+06	6329955	1.37788e+06	6262644	7927530	6086611	12530484	7246906	20029282	21057894	11672136	109648912	2.55938e+06	14212713	15675076	1760023	4506931	6.66692e+06	5239208	9668484	7.0264e+06	19235342	3.12293e+06	10250467	6768322	7674635	4942000	3.29944e+06
P01860	IGHG3	Immunoglobulin heavy constant gamma 3	IGHG3_HUMAN	19201668	11879274	43492488	7.09655e+06	381922688	117649224	17404222	38438456	97184144	16845174	13365978	18395822	22282500	19552520	20209010	19165358	19986048	553488256	15523485	15988953	6.20957e+06	15280056	13901925	11707984	20064426	21944366	43743464	48743416	24384080	161001136	4.40379e+06	25036734	81236912	7.2273e+06	8.01753e+06	14479607	10784933	18258144	20335890	27948076	11187743	24009710	25737254	19549182	16443288	10791110
P01861	IGHG4	Immunoglobulin heavy constant gamma 4	IGHG4_HUMAN	97793.8	18022.7	339767	13064.4	12129239	139392	74885.6	20536.2	665803	23397.9	27318.6	54188.3	153338	115451	36809.1	35359.2	103114	7099083	50609.8	88339.5	19305	128280	70790.5	196190	227731	86623.2	172909	602768	498134	3.67553e+06	7257.29	17247.7	21644.2	89574.3	62315.6	24024.6	80529.2	112555	82929.2	170129	3607.73	228405	251412	68766.6	5813.01	1.31997
P01871	IGHM	Immunoglobulin heavy constant mu	IGHM_HUMAN	3.74636e+06	3889483	16830970	954994	61550052	4217126	6378395	1.19249e+06	11867834	1.00533e+06	2.32657e+06	3.90606e+06	1.00835e+06	3.72289e+06	1.37718e+06	2907262	28966892	204046448	3615471	2.46549e+06	1.43905e+06	3.35213e+06	2467497	3823053	2731568	3.62177e+06	2.23556e+06	4.2279e+06	4.53139e+06	22237572	3.45817e+06	1.5521e+06	7087577	729770	4.45411e+06	7951395	984090	2.59615e+06	3297366	12883430	3.74362e+06	2.96869e+06	24577320	1.97826e+06	6431069	844743
P01876	IGHA1	Immunoglobulin heavy constant alpha 1	IGHA1_HUMAN	11981179	7876282	19102330	8483150	173308672	2749837	2264727	25536.1	30914320	10668711	25934142	7125381	13824181	13301369	12392826	10640224	5886422	115780720	10187423	17441632	2.9694e+06	8472555	6.05379e+06	6799958	14153608	13738464	11539528	25373782	14471932	96394368	7.02538e+06	18431122	16610325	54953156	4.41051e+06	4.04784e+06	8546952	12574255	10577474	11833939	7.56605e+06	14280349	11132785	10550564	8687584	10428006
P01877	IGHA2	Immunoglobulin heavy constant alpha 2	IGHA2_HUMAN	17400242	17898078	29971916	17966106	164246416	7.03115e+06	4.56844e+06	17972.3	37939164	12975960	26953546	10069745	18919682	30052814	20508002	18310456	7433683	101264880	12529104	13488382	5.81665e+06	18086410	11349055	12082419	23966166	19394480	17932746	35792024	27437718	113012544	11240654	15416912	12817969	231802512	7224422	6608039	13479670	15604376	19875272	19765228	16119208	20214360	27955598	19525010	14034688	12617957
P01880	IGHD	Immunoglobulin heavy constant delta	IGHD_HUMAN	91378.4	220186	133303	35552.9	624960	1619.5	13090.5	106144	NaN	27375.8	119417	NaN	328337	89244.2	495439	64438.5	NaN	1697638	53368.3	35775.7	155684	63365.5	NaN	49320.7	169672	135026	176011	166297	46648.8	18606.2	16440.8	58787.9	1.08332	8461.79	NaN	40522.1	91906.4	101503	114984	60774.8	NaN	96689.9	NaN	95545.3	294470	1.31997
P01889	HLA-B	HLA class I histocompatibility antigen, B alpha chain	HLAB_HUMAN	58690.7	66967.1	49439.4	55596.9	14213.7	150554	14574.9	251512	40096.4	64243.3	9919.77	126064	64769.6	95574.1	106354	63225	346598	100743	75767.7	90316.9	79438.7	57812.6	61419.3	29753	45815.4	41398	61125.9	94985.6	41932.8	10821.9	69651.3	11478.4	114360	68451.5	91880.3	55596.1	40254.5	63712.2	49431.8	75270.7	50783.9	55689.8	79527.1	151271	170157	53672.6
P01893	HLA-H	Putative HLA class I histocompatibility antigen, alpha chain H	HLAH_HUMAN	20568.7	NaN	NaN	NaN	NaN	179521	NaN	196057	21628.3	21816.2	NaN	12375.8	57550.5	1.48831	NaN	NaN	453846	NaN	NaN	NaN	11362.2	NaN	NaN	NaN	NaN	16554.8	NaN	NaN	NaN	NaN	NaN	NaN	NaN	NaN	NaN	NaN	NaN	NaN	15929.2	NaN	NaN	NaN	59379.2	306128	159626	NaN
P01903	HLA-DRA	HLA class II histocompatibility antigen, DR alpha chain	DRA_HUMAN	74756.6	23072.2	75409	10211.9	NaN	15029.7	39336	45692.8	83385.6	76785.8	28577.1	22476.2	52293.7	73052.6	33461.1	NaN	24221.3	55594.6	35012.8	25212.9	20905.7	54058.8	63572.6	53464.6	15317.1	53456.6	22726	32585.8	NaN	28756.5	75063.4	19236.7	NaN	11438.3	17981.2	32374.6	13056	42405.5	61654.9	118683	NaN	64955.8	34873.3	46295.4	23205.5	48001.6
P01911	HLA-DRB1	HLA class II histocompatibility antigen, DRB1 beta chain	DRB1_HUMAN	47223.4	1.81311	17795.3	20530.1	NaN	41803.6	70871.2	5834.54	33559.3	96210	84540.5	64764.6	35380.5	57748.4	71045.5	38827.1	28673.9	1.03068	25920.4	NaN	90425	31828.6	86104.6	33837.5	26906.9	69407.7	51442.4	100634	48934.8	1	132604	90888.1	49323.1	153509	3380.98	35738.6	NaN	106720	11126.5	60612.3	21776.7	44245.3	25938.7	72604.6	35837.7	59383.8
P02008	HBZ	Hemoglobin subunit zeta	HBAZ_HUMAN	22388.8	NaN	24729	NaN	NaN	NaN	NaN	NaN	NaN	NaN	NaN	NaN	NaN	NaN	NaN	NaN	NaN	NaN	17125.3	NaN	NaN	NaN	NaN	NaN	NaN	NaN	NaN	NaN	NaN	NaN	NaN	NaN	NaN	NaN	NaN	NaN	16757	6869.65	21488.3	NaN	NaN	NaN	NaN	NaN	NaN	NaN
P02042	HBD	Hemoglobin subunit delta	HBD_HUMAN	446185	10181.6	194701	95117.7	477799	36906.8	483083	66644.8	49921.8	115508	111781	97188.4	105279	484881	70972.4	134743	4.31492	2.30821e+06	64408.7	55769.2	41031.3	50725.9	62437.8	16084.4	102629	544439	33897.9	150128	168329	780477	198949	119860	45481.8	19369.4	11571.1	124504	278545	51268.9	354069	14218.7	55501.2	32424	1.1225e+06	19959.8	30415.9	53019.5
P02100	HBE1	Hemoglobin subunit epsilon	HBE_HUMAN	NaN	NaN	NaN	NaN	NaN	NaN	NaN	NaN	NaN	NaN	NaN	NaN	NaN	NaN	NaN	NaN	NaN	NaN	NaN	NaN	NaN	NaN	NaN	NaN	NaN	NaN	NaN	NaN	NaN	NaN	NaN	NaN	NaN	NaN	NaN	NaN	NaN	NaN	NaN	NaN	NaN	NaN	NaN	NaN	NaN	NaN
P02144	MB	Myoglobin	MYG_HUMAN	231948	112510	79148.9	263992	33291.7	313665	53151.7	240836	189546	80360.1	67563.3	150926	219629	261539	155348	90131.4	393734	23012.7	179317	92876.3	132484	113095	313339	50202.2	117246	252811	105311	201531	130378	14337.4	77007.6	126114	60519.4	133843	99075.2	53859.4	199085	122965	231211	217807	76413.8	308638	231290	174906	491282	147608
P02452	COL1A1	Collagen alpha-1(I) chain	CO1A1_HUMAN	68314.4	114365	131481	147165	82778.8	263872	61342.5	149979	54745	216132	145016	380658	167570	63956.4	205297	81096.9	392733	142927	215278	68777.5	422694	183166	141017	62354.2	269021	55969.9	717222	281457	180985	92107.9	148030	102122	190197	112855	241761	166082	112440	49093.1	42411.7	181100	109656	146134	131698	173541	226328	184685
P02461	COL3A1	Collagen alpha-1(III) chain	CO3A1_HUMAN	73976.8	36575.3	275664	77154.2	78330.1	45718	168595	124606	24377.9	114186	272473	77198.4	41201.1	112798	54936.6	90127.5	86051.2	35705.2	64014.6	214601	394406	113555	331594	182537	112455	214217	139661	46056.3	330981	448333	79466.2	89798.3	65857.5	115231	72680.7	75520	57292.6	67492.7	218218	91195.5	68787.3	132691	59645.1	79450.8	72211.8	299107
P02533	KRT14	Keratin, type I cytoskeletal 14	K1C14_HUMAN	884952	655996	1403405	739718	2297756	519183	237927	124086760	41773.1	1.2329e+06	937722	170851	102252	1.43323e+06	901820	429434	10993482	752769	993019	3.89773e+06	197024	97101.6	2.68867e+06	866602	14465.1	1.27725e+06	1.68835e+06	1.48984e+06	62146.7	420767	1787432	219444	654318	1.81546e+06	305632	454767	456337	47581324	1.38258e+06	228612	530397	33346.8	97869.3	1693296	512258	932093
P02538	KRT6A	Keratin, type II cytoskeletal 6A	K2C6A_HUMAN	NaN	NaN	NaN	NaN	NaN	NaN	NaN	21394228	NaN	NaN	116912	NaN	151914	166469	519531	NaN	945224	NaN	NaN	894343	650870	NaN	45903.1	NaN	NaN	NaN	NaN	253661	NaN	NaN	88138	NaN	150622	58788.7	NaN	NaN	NaN	684105	NaN	29260	7262.59	NaN	NaN	89941.4	NaN	NaN
P02545	LMNA	Prelamin-A/C	LMNA_HUMAN	12960.2	NaN	1	NaN	NaN	1.24127	NaN	41250.8	2.70598	3557.54	6332.37	NaN	NaN	NaN	NaN	1313.02	16627.8	1.03068	NaN	1	32345.5	1086.41	NaN	NaN	NaN	NaN	NaN	1.64861	1.27138	NaN	NaN	NaN	5498.88	NaN	NaN	NaN	6253.31	184310	NaN	18645.2	NaN	1.61184	1	11155.6	NaN	NaN
P02549	SPTA1	Spectrin alpha chain, erythrocytic 1	SPTA1_HUMAN	3077.31	NaN	1458.52	1.30708	35023.3	2470.84	10129.9	4961.03	5703.7	1	4726.08	3962.99	1234.37	94705.8	2603.01	1039.92	13028.2	3983.92	2029.84	3429.15	NaN	5536.77	NaN	4391.31	5204.04	1.49744	NaN	1526.56	11039.2	898.142	2676.67	1273.92	1.08333	630.534	4663.49	3152.02	2520.35	8605.27	30745.6	9640.38	13887.8	910.927	13930.1	1.03557	2053.22	1.31997
P02647	APOA1	Apolipoprotein A-I	APOA1_HUMAN	296432960	552483520	593627840	442985408	1027745088	409782656	449620544	414893440	599447168	382177440	550778048	526103872	439248736	308468640	291215968	409578080	181270224	1037112896	305546688	341499200	264771680	409780832	421448992	395906432	559387584	308799936	291955840	198456512	489258944	574566528	311689728	338730304	292425920	412325600	463850944	464374048	369103840	405697760	274209376	343665760	451708800	230882512	483538432	313899840	250426512	307851968
P02649	APOE	Apolipoprotein E	APOE_HUMAN	52475460	88934944	54929740	39053164	38684224	30323510	45336800	29638526	46282308	54354712	140673792	66313912	38205648	62892744	24287936	49754248	40627500	66454692	49644364	47477416	67381080	49531500	76538536	68101368	89676768	65732076	50106744	35523684	103781952	54952428	61570244	76054384	56552060	69732312	48752612	59450496	78825368	43541100	57305284	55796216	37657928	52431636	57367048	34198360	34850972	81829352
P02652	APOA2	Apolipoprotein A-II	APOA2_HUMAN	12714989	39618636	62085344	41681312	130911840	56228668	43534736	26447584	46091312	31237086	63541016	65563464	87050696	15281225	53234644	47042772	28142902	195522016	44563928	47473232	57021896	33816848	57983828	44881700	55893720	14467804	23533104	18906264	35182208	66667420	49798812	53199940	36836552	57397892	66050932	62049504	41176948	40168736	14534425	41076664	52850052	20804356	50269360	25445728	38223528	56601580
P02654	APOC1	Apolipoprotein C-I	APOC1_HUMAN	24645006	68847640	55818296	50806472	56473688	41619588	33868532	57346632	71820968	28101740	61115720	50026020	52423724	30883374	37082876	36589648	19773302	53691816	42683828	39484020	26795098	45958996	63158352	36871748	55799864	28365256	36956208	23369046	49325124	46711328	48936568	52776648	32706632	48257428	46470224	34824704	42155664	30686582	28621336	58720804	68859312	33207524	67389160	16615798	29159524	111904504
P02655	APOC2	Apolipoprotein C-II	APOC2_HUMAN	6922438	3.17821e+06	9722684	14646025	16453390	11917675	8414740	19161144	7233080	9060417	14499446	8837275	25177268	9035829	16063447	13352216	4754415	28701066	9488024	12179287	14692371	10497325	14742016	6255966	17796360	9493337	12557595	12323560	16051166	11198339	24055526	20480064	5.43737e+06	6.35778e+06	11449510	9410474	11378573	14377461	6633823	18573204	7633057	8303352	21281734	4.28527e+06	8839877	50090308
P02656	APOC3	Apolipoprotein C-III	APOC3_HUMAN	20763142	40161760	80515888	80597240	76663344	52710356	52812272	88570856	130819456	35016660	95061456	46262064	50311052	19779724	42841460	47280720	13905549	94168720	61785224	37807280	34677680	60435292	81154792	50615136	75218496	20625442	48364260	26713338	81187688	54419344	58249724	64179220	33078134	46154200	53375556	30407180	69716000	46206912	19202138	109941904	79999664	38548128	91035872	52989920	31963536	191636624
P02671	FGA	Fibrinogen alpha chain	FIBA_HUMAN	4.97957e+06	8234312	35570560	9940863	27863284	1.30639e+06	10870047	37358616	7178437	1.59623e+06	2.00123e+06	4.37726e+06	47238916	5878813	47647012	2271186	35198920	58347900	11148421	6.35613e+06	5746848	8965201	4.05591e+06	20999848	1.34229e+06	5.25624e+06	48745068	10050904	22036958	32629444	32672000	6503576	1.45825e+06	1.744e+06	3.34221e+06	1654026	1.58039e+06	3.34513e+06	4619162	76125584	1.36536e+06	4073136	6131459	3467612	1804958	1.46979e+06
P02675	FGB	Fibrinogen beta chain	FIBB_HUMAN	4.10934e+06	1.31517e+06	54365748	520323	129675528	482667	14663692	2.68681e+06	2.65864e+06	977648	2.77429e+06	1265246	68043400	4.36924e+06	75740000	3.02694e+06	3.56764e+06	190887808	12801666	8981810	3.4048e+06	9229874	5669837	31396326	697750	4897396	69975088	17233620	1.67748e+06	95455336	51346488	8676130	1.38389e+06	1.90045e+06	1.52246e+06	1.73534e+06	1.29774e+06	2.04558e+06	3.74145e+06	1.93034e+06	870021	2.79388e+06	14394670	1236821	1.17264e+06	1.59393e+06
P02679	FGG	Fibrinogen gamma chain	FIBG_HUMAN	4918366	1685867	58227292	778793	102743920	680781	17623610	3569527	3.79598e+06	1.1582e+06	3.03905e+06	1.91821e+06	105704352	4953556	88188912	3.2227e+06	4.10757e+06	131174776	12500466	9456537	5.35844e+06	9238736	6047877	33681788	830759	5122710	81784576	21654472	1606644	88977304	58411960	10411967	1639579	2.2933e+06	1.57503e+06	2.03244e+06	1.58246e+06	2223483	5.00409e+06	2.45082e+06	1332564	3.03107e+06	17675550	1473327	1.5988e+06	2293616
P02730	SLC4A1	Band 3 anion transport protein	B3AT_HUMAN	25872.2	15187.3	14104.7	6558.54	6526.55	18975.1	63792.9	9696.23	36134.4	8261.65	6050.81	11685.9	20478.4	34259.7	17990.7	22525.6	70110.9	21167.7	15992.8	11069.1	5693.73	2536.4	2904.29	42422.1	22424	33403.7	1552.93	21966.5	93758.1	26616.1	14428.7	23054.1	3128.36	323.41	1309.55	11439	56614.1	13866.6	24598.4	2658.81	18068.8	3356.58	18899.3	4321.69	16064.2	1734.73
P02741	CRP	C-reactive protein	CRP_HUMAN	25280172	1.15504e+06	17125696	1.61459e+06	153865	1064499	23098342	7.81401e+06	3.04874e+06	79749600	2.64715e+06	9141393	4744046	29200040	1.61515e+06	70116920	1.13859e+06	5676793	19815054	11065007	86091616	22398184	8933485	2.90145e+06	1.38411e+06	25504374	3770382	7.38365e+06	217767	595587	3.6005e+06	4.89257e+06	43648544	1.5512e+06	4.62207e+06	164308736	28994478	28806852	21749636	7237430	2.83057e+06	31292764	27879534	68700240	1.33269e+06	2.77757e+06
P02743	APCS	Serum amyloid P-component	SAMP_HUMAN	50280376	34560888	31662070	60903548	29802898	27582524	33902788	51507176	38786376	43885788	21169988	27029074	45183000	50317512	49805884	54044016	29515482	27223044	32580874	41196436	29135718	35894428	38933408	37319276	37067044	53959864	46647068	45091784	39425036	35490760	27640782	30406144	71855376	44375556	41670616	47124272	45474692	35152888	46735160	32313076	38803712	57507560	23574410	69855864	41119764	24064494
P02745	C1QA	Complement C1q subcomponent subunit A	C1QA_HUMAN	2.43157e+06	5147891	5151234	1.18355e+06	2.67627e+06	3.6462e+06	3.66874e+06	3.2999e+06	8322772	1.58164e+06	3.39996e+06	801107	2.49736e+06	2196371	2.93524e+06	2.79936e+06	10186031	4.03188e+06	3.05486e+06	4.00182e+06	2686660	2847934	2884137	5499209	2.68061e+06	1.40311e+06	5.42617e+06	2.51864e+06	3.31494e+06	3.01298e+06	4393416	4379349	2.53858e+06	1.66255e+06	1.93077e+06	1.91713e+06	3.0107e+06	3.71393e+06	4.19303e+06	4490689	3.53006e+06	1369289	5.01825e+06	3479285	2762742	3.13803e+06
P02746	C1QB	Complement C1q subcomponent subunit B	C1QB_HUMAN	14199947	17812074	17439902	5612774	25887370	17000412	21054288	11180591	18637972	8712492	12541884	9416622	21313662	15525327	13310481	17546396	25313948	39209252	11364021	17776156	12389644	10910130	11070118	23343618	15476398	16759565	24491182	15279690	16028597	30124608	15601109	16121090	8556298	5.80855e+06	7.12937e+06	10551609	9980408	17242566	13900099	13805015	13051500	4813904	18278522	14770119	11226236	10162926
P02747	C1QC	Complement C1q subcomponent subunit C	C1QC_HUMAN	13515530	17065186	22184164	6088834	25033938	17418296	23815182	13618015	26121966	10910457	14964316	7331801	20965150	14390721	13581142	19360716	19986390	38434860	11194938	18807192	14176598	11526136	13056640	27963972	14763008	14203260	26560988	17290290	15384822	30969962	19534178	18626260	11693891	6736385	8.04889e+06	10886292	11792742	20279624	14872978	13786978	16714866	5.75549e+06	22069054	18235428	11195386	12735154
P02748	C9	Complement component C9	CO9_HUMAN	41073396	18822124	32700782	17643432	20035228	11917777	22559586	29843826	26980530	56782156	31904064	30970224	33626656	45297240	14401081	65077100	13495432	41216012	32643754	46837696	24883616	37347848	31098172	19373240	23126884	45490604	51765456	15649074	32598532	17852856	40293268	36727940	29502264	38153276	32571974	72768488	33485980	44196648	44850160	36912244	27143732	22016644	59218700	60713752	21615320	12630367
P02749	APOH	Beta-2-glycoprotein 1	APOH_HUMAN	89462488	97114120	77708480	107617264	124471128	79565016	65126348	101607944	151496976	60960192	91407808	73623264	91303696	86327392	81484256	91899920	49521116	148742976	70025752	31623130	64548556	80429808	87471896	82045184	85298208	84896960	81713600	72086064	93865848	129230144	73500672	78519376	56612468	88473688	65787860	60073460	84671040	69654064	74572416	101841920	83756976	81015728	78675168	62630268	68701384	83463808
P02750	LRG1	Leucine-rich alpha-2-glycoprotein	A2GL_HUMAN	30059710	27920694	34283984	26466024	13365232	34541056	28796462	26068372	23643732	68146288	20354792	36549728	30782228	29166182	31205912	77373504	76256216	18823152	36528900	46686572	41929356	43089716	29746602	26138326	20460830	33465924	39084864	31816454	26888100	16141455	35076120	19402196	53425972	37865224	28593924	81409920	25873170	39199652	27587996	44851920	26774414	46635084	56488708	65437308	26987648	33408514
P02751	FN1	Fibronectin	FINC_HUMAN	60899552	168494640	108203496	49381296	129488680	60977444	128685568	145018752	40163564	22934272	109742368	65025584	158539152	63294084	220529248	23499268	66851384	92197968	86754104	193804624	80437872	94884792	53877892	116895680	93119800	71269088	315223040	82776232	77917224	152949392	161197584	84567416	52590368	45633276	51155620	33253338	50366600	94590640	66288836	138545936	146540976	57057640	50565588	23956396	78510472	103319304
P02753	RBP4	Retinol-binding protein 4	RET4_HUMAN	70492544	108116912	44122788	64289400	41997736	54072384	41818476	75317880	40907904	25016558	62314240	37534624	47656016	84187560	99649232	30362990	91375896	44977556	56838952	33137010	31350304	57093184	77449984	70741544	61811256	85808336	72130568	87701504	83000224	48758256	40626796	52308476	35943540	52612500	69852792	16101603	95272960	42189768	74222424	52724536	74517776	102695416	51086188	92582224	67179936	57584568
P02760	AMBP	Protein AMBP	AMBP_HUMAN	200243520	183712816	145227712	173786400	130836056	166639888	148717744	182616848	149277680	169373536	190023280	174133216	173449888	205651568	160077152	158499456	143463008	123540248	158803200	167475824	141179264	165280416	175842432	158256192	194982080	209027008	190530480	149288112	192747856	135201504	171355664	143934144	129478192	142595504	162876752	208978464	179268832	155819712	198069920	166187552	180129296	172597440	138610080	122077000	143875568	157416800
P02763	ORM1	Alpha-1-acid glycoprotein 1	A1AG1_HUMAN	11262524	5710230	22850936	4904497	78629176	4055995	8840130	4821467	12400428	19470452	5236257	3.76321e+06	4374954	12892187	10164478	25053594	9125628	113277904	6.54083e+06	7094410	5801542	6056080	6394100	5521095	5574672	12383106	7904758	6263133	7260757	14475566	6615199	4.73561e+06	18319840	7232865	7.06785e+06	19784974	9535416	7.19662e+06	14219185	7.41911e+06	8457060	10212996	85811416	18763572	4.99254e+06	5691187
P02765	AHSG	Alpha-2-HS-glycoprotein	FETUA_HUMAN	146870704	187094080	107289608	205481824	91349000	170889744	109126896	132914496	204295264	103371672	128837880	138737408	178251392	149350960	256993520	162188160	227716752	127782728	136031136	117428768	165579632	148444976	122144432	121444144	187400608	158372192	163831920	193305168	107881632	142684352	133539520	162349312	119660536	92046416	185053408	129006632	121824688	99171080	113339800	160181136	157683776	141500368	128949424	128726384	192678464	174193648
P02766	TTR	Transthyretin	TTHY_HUMAN	272226144	230279216	176187904	339646880	250949952	282468320	170505424	266341808	204814192	125883504	226522592	200324224	225483200	361923392	366735488	168516352	308145568	195353552	251934496	162144048	163669600	236276704	281862304	341651008	371305472	385037088	299652928	364480928	400570464	247301648	220022400	232922544	178457408	281609888	294131776	139997280	299441920	185434384	321425696	208062688	284640064	291997376	166823920	230596688	273270496	271976128
P02768	ALB	Albumin	ALBU_HUMAN	301040160	287510656	479620160	295024416	2535551744	316413760	254854848	311567232	847436096	215654720	353820832	271399520	331656800	283527712	433457632	358062176	466133888	2336625408	202236064	212438352	208642560	197046208	264627840	223393888	345497152	304241312	298495680	335307104	322128704	1607094144	219329424	293199968	212696448	305276064	262201920	209510720	182710720	202890512	281054912	230847776	294154624	344369536	594992512	203087440	436827520	300895296
P02771	AFP	Alpha-fetoprotein	FETA_HUMAN	NaN	NaN	NaN	NaN	NaN	NaN	NaN	NaN	NaN	NaN	NaN	1.04697	832.068	NaN	NaN	NaN	NaN	NaN	NaN	1	NaN	NaN	1.04106	NaN	NaN	1.49742	NaN	NaN	NaN	NaN	NaN	NaN	1.08332	NaN	NaN	1.08169	NaN	NaN	NaN	NaN	1.14119	NaN	NaN	1970.73	NaN	1.31998
P02774	GC	Vitamin D-binding protein	VTDB_HUMAN	379011200	316463744	186108352	325036352	114450688	257563600	194891136	222257920	109903320	284368256	227410480	243422352	265887264	410130976	412010720	272410848	598597760	104861672	245359184	232668064	261887856	232974288	263042432	203092768	252270384	418850656	276117824	363396832	288097792	230062672	232646752	273181568	344653088	313416320	331726496	299321760	252461968	238548336	374467168	240776656	304889568	401990400	254205408	246997136	262203328	250779200
P02775	PPBP	Platelet basic protein	CXCL7_HUMAN	1.47267e+06	11458186	2.68169e+06	709544	4.40969e+06	14371852	2.74452e+06	1.99716e+06	453339	415200	833776	831433	1241703	1.50945e+06	634477	108527	5866857	4.85547e+06	1.05024e+06	85443.4	56349.6	668402	798877	1.11771e+06	312742	1.62602e+06	731861	166576	460966	602652	902572	354498	1.30958e+06	580315	1.70487e+06	298281	76802.2	1847610	1.58635e+06	382101	6652469	409252	1.24994e+06	562397	2.24617e+06	1.1463e+06
P02776	PF4	Platelet factor 4	PLF4_HUMAN	146477	1224349	353854	50856.5	79525.8	707494	327806	112939	72466.8	79805.7	84838.6	56150	28437.9	244756	16365.1	NaN	233940	NaN	150630	NaN	10911.9	80571.5	72678.8	172427	56649.8	190927	NaN	NaN	161113	NaN	46459.5	78186.8	129036	72168.4	149460	25238.9	NaN	85617.9	201579	NaN	632534	62198.8	91554.2	92248	152788	66832.9
P02786	TFRC	Transferrin receptor protein 1	TFR1_HUMAN	1.91947e+06	1.33254e+06	1.16025e+06	1.31528e+06	771503	1.67221e+06	669756	1.65128e+06	1.64862e+06	2.86071e+06	1459533	1.38194e+06	1.34516e+06	2.03733e+06	1.50379e+06	1343125	5298433	946878	1.70077e+06	1.98174e+06	2.89777e+06	1.70134e+06	2.0417e+06	1.11761e+06	1642832	1.99656e+06	1.54379e+06	1703462	2.14352e+06	1.28747e+06	1.59999e+06	1.8714e+06	2.44221e+06	1.82488e+06	2.06096e+06	2.41032e+06	1.85799e+06	1.63881e+06	1.73487e+06	2.94488e+06	1.69485e+06	3.01164e+06	1.15588e+06	2.62748e+06	2411770	1.56836e+06
P02787	TF	Serotransferrin	TRFE_HUMAN	58801128	45519080	38388120	47972928	207380160	43104532	29680334	46040012	28882880	34973496	40153768	45761452	43326136	61592264	71946336	33588592	90960072	162378960	30266820	30853490	45519192	29732754	43489880	31480970	46162156	68276264	48203644	59864992	47813980	74232664	33758960	41351876	31591698	47985724	45464636	36861868	39922624	29064088	56059208	24523060	50983532	61880144	43761688	32559710	64130408	48969740
P02788	LTF	Lactotransferrin	TRFL_HUMAN	8684.14	44955.6	53782.1	14488.5	33581.8	20415.9	49937.1	19300	18479.9	14496.8	23188.2	18456.8	97216.3	35808.6	59472.2	19077.7	64080.1	80386.2	9632.6	24789.1	22071.4	11416.9	11798.5	19596.2	22178.2	26193.7	28364.8	39994.4	27210.1	32336.9	30644.9	286999	5292.69	7.49129e+06	6336.7	7629.24	4520.66	19189.8	375613	27229.8	34174.5	17892	19203.2	54931.1	25253.9	17867
P02790	HPX	Hemopexin	HEMO_HUMAN	1037028480	808726400	579701824	904441472	530271136	782414976	535982432	838345216	759148096	761265344	756296768	582513856	644265664	1040856512	963763840	741341824	1415557504	523305728	673794816	728119872	755004480	722861248	808593792	648015616	765038400	1005433920	826775808	1024536960	962223744	640347456	791236480	864081216	788480768	848552448	849289920	831846080	896609536	619912832	1033277056	516968896	713471488	1266217600	769416832	974547008	923149696	916340480
P02792	FTL	Ferritin light chain	FRIL_HUMAN	278378	76518.5	35798	296916	37575.1	152008	87605.7	74373.7	12602.8	201915	14158.4	132776	159098	258360	191704	41095.4	105669	NaN	17943.7	37635.2	280558	79211.6	1.04106	54444.9	75044.6	333927	38368.5	145060	169977	89485.2	1.03778	127936	42838.3	21323.5	55607	1.0817	40815.2	30261.4	330315	104760	34956.2	135319	70413.3	82911.4	21753.7	12849
P02794	FTH1	Ferritin heavy chain	FRIH_HUMAN	NaN	NaN	NaN	5964.52	NaN	NaN	NaN	16014	NaN	NaN	NaN	NaN	NaN	1.4883	320761	NaN	NaN	NaN	NaN	NaN	NaN	NaN	NaN	NaN	NaN	NaN	NaN	NaN	NaN	NaN	NaN	NaN	NaN	NaN	65992.9	NaN	1.07838	NaN	NaN	NaN	NaN	NaN	NaN	NaN	219597	NaN
P02795	MT2A	Metallothionein-2	MT2_HUMAN	NaN	NaN	NaN	NaN	NaN	NaN	NaN	NaN	NaN	NaN	NaN	NaN	NaN	NaN	NaN	NaN	NaN	NaN	NaN	NaN	NaN	NaN	NaN	NaN	NaN	NaN	NaN	NaN	NaN	NaN	NaN	NaN	NaN	NaN	NaN	NaN	NaN	NaN	NaN	NaN	NaN	NaN	NaN	1.03557	NaN	NaN
P02810	PRH2	Salivary acidic proline-rich phosphoprotein 1/2	PRPC_HUMAN	NaN	5634.95	1	NaN	NaN	NaN	NaN	612.216	NaN	NaN	NaN	NaN	NaN	NaN	NaN	NaN	NaN	NaN	29173.9	NaN	NaN	NaN	NaN	1220.4	962.259	NaN	NaN	NaN	1219.37	NaN	3193.56	579.756	3171.76	NaN	NaN	NaN	NaN	73873.1	NaN	NaN	47051.6	NaN	NaN	NaN	NaN	NaN
P03950	ANG	Angiogenin	ANGI_HUMAN	137364	177416	157702	NaN	143998	106727	184297	56164.7	232342	34280.3	58970.1	70139.9	109306	165430	52768.3	91528.2	258695	230084	91218.8	33970.7	150065	17029.4	54771.9	460379	92546.8	172551	32700.3	145092	183103	149724	48478.7	97687.1	57701.3	32889.3	37318.6	67296.2	73435.7	71635	134278	42792.2	100103	25873.9	154693	72401.6	74221.3	8845.67
P03951	F11	Coagulation factor XI	FA11_HUMAN	2618461	2445577	2.6969e+06	3086641	3.29659e+06	1.7911e+06	2.70454e+06	2.06528e+06	2.73438e+06	2.64834e+06	2.68349e+06	1.05463e+06	2.55664e+06	2.83325e+06	2.05585e+06	2.74811e+06	2.28815e+06	3.67147e+06	1.73735e+06	3350817	2.01492e+06	2.54258e+06	2569541	3.09615e+06	2.60239e+06	2.93154e+06	3205294	1254126	3.00687e+06	3189659	3.52168e+06	3.75314e+06	2.11697e+06	2.8384e+06	2.82228e+06	2.26509e+06	2.59371e+06	2.24902e+06	2.57223e+06	2.56224e+06	3.09237e+06	1.53203e+06	3.82723e+06	2.74945e+06	1.86378e+06	2.25333e+06
P03952	KLKB1	Plasma kallikrein	KLKB1_HUMAN	21524496	19839372	14480053	22760202	15721898	18224190	16722312	14279790	13945618	17019764	18772828	14004996	23563720	23932152	28772244	19878942	22913890	17816888	17695186	16888144	13863597	19723954	17671230	23815476	16040034	25339618	22037726	17842070	25224458	22350952	15217661	20828822	18551332	20998918	24775462	15388574	18908092	15202263	20307366	20183264	20422308	13693737	18285572	19882680	20248264	17883324
P03973	SLPI	Antileukoproteinase	SLPI_HUMAN	NaN	NaN	NaN	NaN	NaN	NaN	11662.4	3842.11	11839.3	1	NaN	3346.42	6167.8	NaN	17591.2	9147.44	NaN	NaN	NaN	6427.27	7786.19	5299.33	8686.35	22594.8	7282.91	NaN	NaN	NaN	29763.3	12927.4	NaN	20180.1	5769.71	NaN	2960.01	3510.77	13498	NaN	1.35088	1	10747.3	NaN	21603.6	11185.4	NaN	NaN
P04003	C4BPA	C4b-binding protein alpha chain	C4BPA_HUMAN	75799184	47770464	69506696	70750656	60857436	39845456	58779112	51287524	53844284	79757088	45521800	31465582	61577616	72272512	44016572	88566568	33382432	111416384	55569032	117201104	34131140	58533720	62357888	65192380	51072600	81325584	83744320	26410644	78569760	72874448	61608580	18265434	72154680	45530032	53835884	67041832	50653260	64530984	71905816	61961328	54597364	27903050	82310320	84469072	27783598	45433588
P04004	VTN	Vitronectin	VTNC_HUMAN	120185336	111221640	95325760	133729432	126281696	78431032	110527536	108882344	74259384	73174240	104219584	105373264	139936688	107862016	111266856	113927280	74578816	117167720	79736848	100683152	59731560	102974352	98703200	75083744	112216976	126297152	84018464	67634864	90753248	116245272	58548328	85239704	64595496	69011400	87612720	133047592	79820816	80752360	107260656	94254032	87200096	54505992	114748440	100237920	69661360	88688520
P04040	CAT	Catalase	CATA_HUMAN	779058	259988	428382	593234	98405.3	791411	1.12746e+06	560988	370503	707935	560580	773598	614962	947716	441677	625101	372707	160783	543618	498396	668528	554430	284815	420211	964526	990902	438794	1.30484e+06	1.33126e+06	805336	1.44144e+06	887246	446019	220317	284538	549456	2483684	795420	928251	503116	739435	844291	863394	438084	552908	599047
P04054	PLA2G1B	Phospholipase A2	PA21B_HUMAN	NaN	NaN	1	1.30708	NaN	NaN	NaN	NaN	NaN	NaN	1	32789.8	NaN	NaN	NaN	NaN	NaN	NaN	9059.49	1431.59	NaN	6197.15	1778.41	7417.99	17591.7	NaN	2333.51	9070.91	NaN	1	10597.8	NaN	NaN	34329.8	1.2163	4639.67	11630.8	10078.9	NaN	4492.09	NaN	1.61184	1	18059.6	NaN	1.31997
P04062	GBA1	Lysosomal acid glucosylceramidase	GBA1_HUMAN	11192.7	14204.7	1	NaN	NaN	3983	NaN	26270.7	NaN	NaN	NaN	20335.1	NaN	47933.8	NaN	1	NaN	11115.8	3081.35	NaN	4270.22	NaN	1.04106	NaN	4640.03	NaN	NaN	NaN	1.27138	NaN	10807.5	9173.7	1.08332	13878.1	NaN	6106.79	1.07838	112186	10517.8	19371.7	5503.49	14662.5	NaN	48821.2	NaN	8160.99
P04066	FUCA1	Tissue alpha-L-fucosidase	FUCO_HUMAN	228893	579656	178909	114272	78096.7	81433.3	116994	259397	163781	264607	130841	68814.8	54211.1	281051	99665.2	265847	438395	131980	194703	91929.7	377474	175687	230749	98858	312390	296137	274258	392971	94146.7	295043	200014	267714	221619	95433.2	277815	87422.9	119949	20126.1	304546	145493	222451	321426	164894	26930.5	103819	330499
P04070	PROC	Vitamin K-dependent protein C	PROC_HUMAN	3.90982e+06	5582954	3.69602e+06	5013477	4.18822e+06	3562812	4270405	4385307	5.34167e+06	2.85754e+06	1.45595e+06	2.72169e+06	3865928	4241726	4.31923e+06	3409035	923176	5274867	3.50573e+06	3.58828e+06	2.41803e+06	4214377	5155492	3.81303e+06	5.41928e+06	4.49615e+06	4.35357e+06	3009622	6472951	3.93561e+06	3.65815e+06	3.27945e+06	3.54489e+06	3.48682e+06	4.31494e+06	2958220	3.52902e+06	4.11949e+06	4.04121e+06	3.94125e+06	4.62537e+06	2.98966e+06	3.63309e+06	3.74449e+06	3.17156e+06	4.00398e+06
P04075	ALDOA	Fructose-bisphosphate aldolase A	ALDOA_HUMAN	1.08797e+06	1.16931e+06	538393	1.55174e+06	540974	1.98476e+06	883248	910134	354984	1026450	442183	613989	663423	1.32319e+06	608476	424520	753625	385080	772607	483559	2.0792e+06	765099	641522	498054	761928	1.21578e+06	839101	915649	654355	399211	817904	655583	1.20018e+06	592874	1.3881e+06	480012	1.04317e+06	1.02009e+06	1173105	753455	1220252	1.11593e+06	577560	1.26416e+06	2.14406e+06	1.06316e+06
P04080	CSTB	Cystatin-B	CYTB_HUMAN	46704.8	50747.5	44612.4	38399.7	39546.7	97591	87740.4	94750.6	92807.9	55120.7	37548.1	55462.9	22845.9	46942	86336.3	35837	53050.1	181326	62568.5	55232.8	75164.4	58582.1	66519.6	31106.1	52814.8	117047	37840.1	68622	200755	20245.8	137508	33371	42220.8	46326	40527.1	30333.9	171308	42203.6	87024.4	66251.2	33188.7	82765.9	101604	98571.1	69982.4	81944.7
P04083	ANXA1	Annexin A1	ANXA1_HUMAN	87812	NaN	3693.15	11961	NaN	13794.5	33052.5	182063	NaN	111008	NaN	1.04698	NaN	7281.06	NaN	3845.28	NaN	12873.2	6791.19	12847.2	17665	14377.9	NaN	NaN	1.27012	21499	7617.92	8648.9	24680.4	NaN	15893.9	1894.41	8591.08	1047.89	8380.5	11340.4	12946.7	107506	NaN	NaN	23225.7	19749.5	11044.5	55958.8	7381.6	16136.7
P04114	APOB	Apolipoprotein B-100	APOB_HUMAN	87816568	79933760	77074656	97748824	85032808	119932488	81968696	94514600	181867104	101122808	45005440	68847456	78256592	82710296	63195720	85888568	27135772	114341504	75696848	69376352	40799560	82490040	96591744	114651032	127116672	95681240	85417952	85224912	101186248	109066568	65792348	108602984	101938160	92246752	75892976	81788544	120397120	76407312	85234032	124146888	129949944	77887528	114259808	45920352	57540144	110300352
P04118	CLPS	Colipase	COL_HUMAN	NaN	NaN	NaN	NaN	NaN	5968.35	NaN	NaN	NaN	17196.1	NaN	NaN	NaN	NaN	NaN	NaN	NaN	NaN	NaN	NaN	NaN	NaN	139773	NaN	240581	NaN	1.14763	NaN	NaN	NaN	85133.1	NaN	NaN	11336	2197.96	NaN	41656.1	NaN	NaN	NaN	NaN	NaN	NaN	7407.55	13677.1	NaN
P04155	TFF1	Trefoil factor 1	TFF1_HUMAN	NaN	NaN	1	NaN	NaN	NaN	1	NaN	NaN	NaN	NaN	18282.5	1.05134	NaN	NaN	NaN	NaN	NaN	NaN	NaN	7221.28	NaN	NaN	NaN	NaN	NaN	NaN	NaN	NaN	NaN	NaN	NaN	9304	NaN	NaN	NaN	1.07838	NaN	NaN	NaN	NaN	NaN	29843.7	6989.36	1.65535	1.31997
P04156	PRNP	Major prion protein	PRIO_HUMAN	121511	NaN	94921	93196.6	NaN	204175	NaN	76922.3	98720.8	10984.3	NaN	1.04698	63798.4	NaN	2.075	NaN	18377.6	NaN	NaN	61303.9	123818	NaN	1.04107	NaN	167178	485461	NaN	192544	114019	NaN	NaN	NaN	NaN	NaN	NaN	NaN	44232.2	NaN	121971	NaN	NaN	86338.3	51101.1	80409.7	171312	165189
P04179	SOD2	Superoxide dismutase [Mn], mitochondrial	SODM_HUMAN	113173	127893	99884.6	139045	64647.7	113828	87436.9	98927.6	79493.3	184503	106749	259422	65441.7	106992	174657	108136	286942	66762.7	152122	109483	411102	144922	70400.2	112758	133938	170976	93309.6	127301	132583	76536.5	112337	103846	203154	129657	112041	107384	43619.2	52393.3	112338	289474	147766	187174	73962.2	131822	290613	99058.5
P04180	LCAT	Phosphatidylcholine-sterol acyltransferase	LCAT_HUMAN	4.70445e+06	4.07322e+06	3.26859e+06	3.82654e+06	2.21375e+06	2.8439e+06	3490311	3.41919e+06	3007361	3.05485e+06	4.45068e+06	3.22268e+06	3.57236e+06	5209049	3.97319e+06	3745714	4.03976e+06	2.4011e+06	3162659	3374580	3.12493e+06	3.4028e+06	4268964	3.45946e+06	4334328	5.36979e+06	4336828	3.04352e+06	3.61557e+06	2820037	3.70349e+06	3.91544e+06	3.12066e+06	3.91664e+06	3.30013e+06	3828498	3253579	3.14431e+06	4.7048e+06	3.55359e+06	3.49091e+06	3.52339e+06	4.02315e+06	4.10396e+06	3.11967e+06	4.52589e+06
P04196	HRG	Histidine-rich glycoprotein	HRG_HUMAN	6037253	6.08769e+06	7387431	911196	9008987	3.87621e+06	7.83976e+06	3.67766e+06	11345560	1.77805e+06	7220654	2.60204e+06	8101646	6.75935e+06	3.62042e+06	5206771	22063226	4027081	3.97466e+06	3.00105e+06	6806209	1623519	3.78796e+06	18372960	5.15495e+06	7078317	3615429	8494900	5143679	4.12661e+06	3.92911e+06	5931907	1.64921e+06	1871377	3.56843e+06	4.02882e+06	2.18669e+06	3780002	5435222	1.82188e+06	5960782	1.31987e+06	3.65646e+06	1.37785e+06	6.54206e+06	2.24244e+06
P04211	IGLV7-43	Immunoglobulin lambda variable 7-43	LV743_HUMAN	10888.9	28990.7	19550.3	2265.05	56643.3	NaN	1	7006.69	51415.5	6260.13	17063.6	1.04698	NaN	12441.3	NaN	7669.15	NaN	150556	3865.1	NaN	NaN	NaN	NaN	10116.6	23094.8	NaN	23921.3	24451.9	10751.7	100294	1.03778	10536.5	20343.2	NaN	NaN	11322.3	16839	NaN	NaN	4742.26	22433.8	NaN	20785.9	NaN	11467.7	NaN
P04216	THY1	Thy-1 membrane glycoprotein	THY1_HUMAN	14241.4	31444.4	34474.1	59175.6	1.23112	73861.3	36206.6	52664.4	62333.4	20045.4	25768	32311.1	27627.9	53194.6	11139.2	38271.4	7845.99	48634.6	37599.2	22107.5	17894.2	34534.4	35319.3	21860.8	50336.6	20192.7	12246.8	32286.2	38185.9	NaN	41062	41112.2	33827.8	19092.6	39000.1	61951.2	51993.4	28884.3	33259.6	75787.8	24276.1	49640.3	24978.8	52596.7	35839.5	38295.1
P04217	A1BG	Alpha-1B-glycoprotein	A1BG_HUMAN	114047008	91568352	85547496	132765504	112890888	101311712	94434688	90117024	126119072	101581584	93807360	114619720	85746520	113623552	104961952	123155464	243852576	166201360	84753648	91602648	103730952	101896144	99418368	99650456	94791808	103133616	104485000	110637800	93007752	131384208	104306232	99793904	109451776	127382768	115639856	148331344	90188464	89090648	113246176	139984880	120279704	160584160	91396936	97008776	90369200	107509184
P04259	KRT6B	Keratin, type II cytoskeletal 6B	K2C6B_HUMAN	3002.21	NaN	NaN	NaN	NaN	NaN	NaN	9608460	91052.4	6172.46	7615.17	NaN	NaN	NaN	NaN	NaN	47637.8	NaN	NaN	302354	NaN	NaN	3069.48	NaN	NaN	NaN	NaN	13776.6	NaN	NaN	16875.5	NaN	66385.3	NaN	NaN	NaN	1.07838	35098.6	NaN	NaN	NaN	NaN	NaN	5352.58	NaN	NaN
P04264	KRT1	Keratin, type II cytoskeletal 1	K2C1_HUMAN	1.84932e+06	916966	2.39766e+06	1.29076e+06	2.04856e+06	487190	190651	60445976	608177	2.29221e+06	1.48316e+06	1.13743e+06	770900	3017373	738272	299520	8790979	420216	1.97377e+06	3.93721e+06	263499	353373	5.5466e+06	654718	19871.6	3.15295e+06	6804418	1.88984e+06	580554	120287	3.52131e+06	149091	1.15953e+06	5515976	26704.1	1.82676e+06	837854	321195488	2677097	206861	1.06309e+06	24029.4	25682.3	4.06254e+06	471112	1248813
P04275	VWF	von Willebrand factor	VWF_HUMAN	1.19789e+06	1.06829e+06	2.92782e+06	343294	2.25455e+06	1.24894e+06	2.26382e+06	2.25505e+06	456778	779947	2.01582e+06	4.69255e+06	7104633	1.42541e+06	6.00407e+06	389217	1.82475e+06	1895590	2.82653e+06	10569617	3.62917e+06	3.26103e+06	1.05271e+06	4372994	1.42079e+06	1.51689e+06	9011200	4625644	1.57374e+06	4.43785e+06	8425215	3.4864e+06	907894	664032	813121	696504	2.44486e+06	1.88555e+06	1.21818e+06	8116124	1.24971e+06	1.81288e+06	421366	761218	1.26158e+06	1589558
P04278	SHBG	Sex hormone-binding globulin	SHBG_HUMAN	1.4946e+06	1.5921e+06	1.1408e+06	555505	1.03602e+06	744414	599294	940635	534865	2241605	1.42817e+06	2.12916e+06	1.1297e+06	1.63087e+06	534798	1.22091e+06	514770	1423483	1.34683e+06	2.20605e+06	1.55972e+06	1.30628e+06	1.80998e+06	690387	742812	1.77004e+06	1.27866e+06	650067	1.30138e+06	891978	3.08427e+06	1.09824e+06	1.36329e+06	2406504	988665	1.62145e+06	511977	1.39646e+06	1.6157e+06	1669777	904436	1.03057e+06	1.28975e+06	135885	1.25223e+06	1.31477e+06
P04279	SEMG1	Semenogelin-1	SEMG1_HUMAN	39915.2	NaN	NaN	NaN	NaN	NaN	NaN	NaN	2.70598	11793.3	NaN	66058.7	2226.79	NaN	NaN	NaN	NaN	NaN	NaN	NaN	NaN	NaN	NaN	NaN	NaN	11329.8	NaN	6084.03	NaN	NaN	NaN	NaN	1.08333	NaN	NaN	NaN	NaN	NaN	4586.13	8028.63	NaN	3599.13	NaN	14348.6	NaN	NaN
P04406	GAPDH	Glyceraldehyde-3-phosphate dehydrogenase	G3P_HUMAN	138197	35494	70802.9	202093	87933.9	303119	209495	165190	44253.4	240969	56482.1	95773.5	73575.5	134513	186209	94651.6	231785	178512	117739	40326.6	86592.8	91556.1	64364.9	55230.1	51630.8	103114	99308.2	63276.9	163804	149414	96624.1	49830.3	139425	20585	50292.5	96080.2	257471	1.91729e+06	118820	73247	123432	130315	150122	189997	198831	50294.2
P04424	ASL	Argininosuccinate lyase	ARLY_HUMAN	37831.5	30656.1	23939.9	58810.2	7390.54	44940.1	30004.1	30126.5	2.706	69563.3	48389.1	141423	13672.8	27887.9	79185.8	39510	15353	NaN	17588.4	32523.6	69635.2	35295	18361.6	34020	34015.9	62342.4	64023	23189.1	29947.6	772919	21582.9	21429	17532.5	17194.3	10598.8	27137.6	27921.1	48197.2	58286.1	33890.7	44968.7	32975.1	100125	18451.5	26067.7	23350.6
P04430	IGKV1-16	Immunoglobulin kappa variable 1-16	KV116_HUMAN	NaN	NaN	113589	2.07094e+06	181515	78681	NaN	NaN	290000	NaN	9697.98	3169.14	NaN	NaN	294151	NaN	NaN	121612	29473.3	153130	NaN	NaN	NaN	102730	221533	NaN	NaN	NaN	6183.55	129555	NaN	120769	178313	8694.71	84370.4	NaN	150820	419424	NaN	NaN	85643.1	259036	177423	257541	396088	NaN
P04439	HLA-A	HLA class I histocompatibility antigen, A alpha chain	HLAA_HUMAN	51718.3	46590.2	86428.2	153746	59594.3	197731	133712	190093	111701	158299	18135.2	59478.4	114790	44796	236505	88455.9	567058	165989	66386.8	93264.6	94606.4	109052	338419	74352.3	123615	70001.7	103839	45658.7	84663	32472.1	197998	22837.9	110450	70637.6	58525.5	161708	38724.9	282692	46533.6	63109.4	105032	67293.1	97705	248357	260596	176559
P04440	HLA-DPB1	HLA class II histocompatibility antigen, DP beta 1 chain	DPB1_HUMAN	NaN	NaN	NaN	NaN	NaN	NaN	1574.85	NaN	NaN	NaN	NaN	NaN	NaN	NaN	NaN	NaN	NaN	NaN	NaN	NaN	NaN	NaN	NaN	NaN	NaN	NaN	NaN	NaN	NaN	NaN	9967.29	NaN	NaN	NaN	NaN	NaN	NaN	NaN	NaN	3681.07	NaN	NaN	NaN	1.03556	NaN	NaN
P04629	NTRK1	High affinity nerve growth factor receptor	NTRK1_HUMAN	NaN	NaN	NaN	NaN	NaN	NaN	NaN	NaN	NaN	NaN	NaN	NaN	NaN	NaN	NaN	NaN	NaN	NaN	NaN	NaN	114652	NaN	NaN	NaN	NaN	NaN	NaN	NaN	NaN	NaN	NaN	NaN	NaN	NaN	NaN	NaN	NaN	NaN	NaN	NaN	NaN	NaN	NaN	NaN	NaN	NaN
P04632	CAPNS1	Calpain small subunit 1	CPNS1_HUMAN	44375.6	1.81312	11427.2	12447.6	NaN	22384.1	27662.1	12427	NaN	16170.7	19964.1	19012.3	NaN	77825	NaN	19239.5	NaN	42569	17084.1	18539.6	86184.2	13595.5	29419.2	14405.9	1218.44	1.49743	20649	34871.8	12180.2	32152.5	10485.6	25589.5	9637.69	43202.7	22237.9	7517.64	27068.1	8132.51	48268.5	20396	14628.2	15899.9	14723.6	23617.7	9518.55	15627.5
P04732	MT1E	Metallothionein-1E	MT1E_HUMAN	8739.04	NaN	12927	5984.79	28743.1	5721.17	11710.7	22411.7	NaN	12263.3	2359.05	18178.1	16132.5	NaN	NaN	16302.8	27396.3	1.03068	24570.9	5782.83	25929.3	28573.5	21579.1	18381.1	20545.8	NaN	12557.1	11665.9	13381.4	1	8292.2	NaN	13401.3	1.23583	17084.3	2206.52	49869.2	2289.03	1767.37	2697.64	6867.03	NaN	11925.8	50772.4	1.65534	11829.2
P04746	AMY2A	Pancreatic alpha-amylase	AMYP_HUMAN	90287.3	NaN	73830.5	34612.8	311737	67969.4	32894.8	43809.1	NaN	42208.7	63093.8	22411.5	36672.5	77895.8	70446.2	17042.7	48272.9	1.03068	61930.5	56059	28388.8	85163.5	139464	38134.8	92169.9	81002	153710	NaN	61146.5	NaN	112914	58791.1	77629	104395	NaN	41847.7	117434	NaN	100613	89416.1	69443	175858	198615	99451.8	20844.5	NaN
P04792	HSPB1	Heat shock protein beta-1	HSPB1_HUMAN	1.39363	55374.1	24082.4	30920.6	42984.5	149097	NaN	305526	26091.2	26842.8	NaN	NaN	NaN	NaN	NaN	NaN	NaN	34027.2	12056	13901.1	8929.36	17541.5	NaN	NaN	3746.7	NaN	16445.2	NaN	NaN	NaN	5545.08	NaN	27998.9	1.23584	50854.3	NaN	4424.3	1.01254e+06	18147.2	5246.27	40379.7	25072.9	19685	34617.8	35128.1	38344.7
P04899	GNAI2	Guanine nucleotide-binding protein G(i) subunit alpha-2	GNAI2_HUMAN	NaN	NaN	NaN	11498.7	NaN	2179.73	NaN	NaN	NaN	13924.6	NaN	NaN	28256.8	NaN	NaN	NaN	NaN	NaN	NaN	7332.26	1.19808	NaN	65370.7	NaN	NaN	1.49743	2168.87	NaN	5934.62	NaN	4846.12	2753.3	NaN	NaN	NaN	5406.03	NaN	NaN	NaN	NaN	17745.5	NaN	1	54259.2	NaN	NaN
P04908;P0C0S8;P20671;Q16777;Q6FI13;Q7L7L0;Q93077;Q96KK5;Q99878;Q9BTM1	H2AC8;H2AC17;H2AC7;H2AC20;H2AC19;H2AC25;H2AC6;H2AC12;H2AC14;H2AJ	Histone H2A type 1-B/E;Histone H2A type 1;Histone H2A type 1-D;Histone H2A type 2-C;Histone H2A type 2-A;Histone H2A type 3;Histone H2A type 1-C;Histone H2A type 1-H;Histone H2A type 1-J;Histone H2A.J	H2A1B_HUMAN;H2A1_HUMAN;H2A1D_HUMAN;H2A2C_HUMAN;H2A2A_HUMAN;H2A3_HUMAN;H2A1C_HUMAN;H2A1H_HUMAN;H2A1J_HUMAN;H2AJ_HUMAN	17148.2	167997	81429.4	NaN	NaN	194382	21221.7	11405.2	NaN	32346.6	NaN	NaN	NaN	NaN	NaN	NaN	24847.9	NaN	88223.5	NaN	80460	78436.4	NaN	NaN	6982.77	NaN	115029	NaN	NaN	NaN	NaN	NaN	21274.7	3841.77	NaN	11245.8	NaN	1.78014e+06	NaN	NaN	424868	37782.4	NaN	NaN	NaN	NaN
P04920	SLC4A2	Anion exchange protein 2	B3A2_HUMAN	NaN	NaN	NaN	NaN	NaN	NaN	NaN	NaN	NaN	NaN	NaN	NaN	24102	NaN	NaN	NaN	NaN	1.03068	NaN	NaN	NaN	NaN	NaN	NaN	NaN	NaN	NaN	66080.4	NaN	NaN	NaN	NaN	NaN	NaN	NaN	NaN	NaN	NaN	NaN	NaN	NaN	NaN	NaN	NaN	NaN	NaN
P05019	IGF1	Insulin-like growth factor I	IGF1_HUMAN	140677	541677	237477	328502	418819	279254	19833.6	28447.7	149808	142685	225148	NaN	562281	220804	358649	296205	288347	180392	256696	16510	129065	17181	261101	403176	320501	NaN	15504.6	621881	477988	448535	337313	14180.7	224678	9974.28	287536	195166	361831	236875	186027	212678	46689.9	277158	332822	279147	NaN	333713
P05026	ATP1B1	Sodium/potassium-transporting ATPase subunit beta-1	AT1B1_HUMAN	34741.2	NaN	4948.33	NaN	39920.6	7438.87	6461.47	6433.19	2.706	1	12650.8	31561.1	4816.76	NaN	21066	13182	NaN	24517.7	19751.3	8968.44	1.19808	16623.1	1.04106	24435.3	8049.6	1.49744	51234.8	1.64862	10538.1	1	7229.54	8744.45	6456.39	12299.8	7174.54	7074.71	NaN	14574.7	1.35088	34625.4	1.14119	1.61184	6186.14	7120.55	8038.07	12628.9
P05060	CHGB	Secretogranin-1	SCG1_HUMAN	4661.43	NaN	NaN	1.30708	NaN	NaN	3406.78	4049.79	13029	23146.7	7570.67	26090.8	12758.6	NaN	NaN	1	NaN	1.03068	NaN	NaN	5606.32	1	NaN	1	1.27012	10206.8	1.14763	9385.82	NaN	7930.23	NaN	4547.19	1.08332	4669.75	1.21629	NaN	25672.1	2997.24	NaN	NaN	1.14119	12920.9	1	9431.9	1.65534	6979.81
P05062	ALDOB	Fructose-bisphosphate aldolase B	ALDOB_HUMAN	563803	1.11597e+06	342176	840808	481299	41568.6	449460	539134	311936	420270	833073	1.49487e+06	225742	642794	1.11439e+06	188940	338249	38869.6	386896	236051	2.15471e+06	382620	208743	437485	494813	642738	173067	375220	246440	329283	215880	487724	231664	339725	293829	153239	183639	241371	599667	460268	326291	465608	56013	320807	303486	228871
P05067	APP	Amyloid-beta precursor protein	A4_HUMAN	12223.6	26652	8492.2	8143.07	15043.5	77135.1	17019.9	11357.9	3310.83	2604.68	1	5933.56	NaN	15818.5	NaN	NaN	11660.5	30734.2	10232.9	21811.9	2268.67	12377.4	7673.23	1221.52	497.898	10162.3	2674.37	NaN	NaN	NaN	NaN	1825.75	7517.13	1437.27	8679.33	NaN	NaN	10925.3	12958.5	12653.3	24439.9	4670.87	9413.38	2770.07	12845.9	14232.9
P05089	ARG1	Arginase-1	ARGI1_HUMAN	22844	NaN	6847.35	18503.8	8545.06	NaN	19336.7	96492.8	40057.2	5326.02	1	6850.94	708.305	14188	NaN	1	9936.7	NaN	87.1653	3567.1	2915.3	NaN	14833.2	NaN	NaN	19808.4	8845.74	NaN	1.27138	NaN	29635.3	NaN	213.152	8937.29	1.21629	1.0817	11558.9	658608	1.35088	44438.9	NaN	1.61184	4088.32	NaN	1.65535	8337.4
P05090	APOD	Apolipoprotein D	APOD_HUMAN	70245776	105740264	69005440	66780904	46361740	68004080	43716016	53050856	92115232	73105408	76444944	108040608	83793344	72636616	51708424	73593656	50795264	63128460	56725668	71474296	50642424	55892112	64965900	71672480	135428080	83890512	39217780	38320308	124130368	69470856	50296192	63818644	49832072	68312088	60609492	48064668	123536248	56205948	72053880	58264336	68204464	51220128	76198304	48623464	88777576	51985196
P05091	ALDH2	Aldehyde dehydrogenase, mitochondrial	ALDH2_HUMAN	NaN	NaN	NaN	NaN	NaN	NaN	NaN	1.21511	NaN	NaN	NaN	5434.68	NaN	NaN	NaN	NaN	NaN	NaN	NaN	NaN	NaN	NaN	14713.8	NaN	NaN	NaN	NaN	NaN	NaN	NaN	NaN	NaN	13942.6	NaN	NaN	NaN	NaN	147101	NaN	138978	NaN	NaN	NaN	NaN	1.65533	105.312
P05106	ITGB3	Integrin beta-3	ITB3_HUMAN	29153.5	43118	141448	56367	11474.4	492562	24133.7	100386	7007.44	141240	10140	15022.8	38681.1	123532	482593	6487.97	NaN	18516.1	18609.5	790148	2150.39	14050.7	3039.69	44254.7	15211.2	100780	88879	17326.4	80947	9406.05	10296	4365.95	253339	5009.92	34314.7	4973.13	48483	38704	43048.8	23281.3	55483.6	198137	2753.11	68435	182605	110138
P05107	ITGB2	Integrin beta-2	ITB2_HUMAN	37840.8	71315.1	39357.9	41686.3	45027.2	45034.9	54777.9	37991.3	40689.9	85841	54893.8	44000.5	48312.6	36683.1	24245.6	35927.3	52021.1	12787.8	36186.9	46333.1	26180.3	43997.9	44394.7	29266.8	72169.9	41130.8	36314.4	37733.2	20620.1	32808.8	59759.9	58560.3	38157	48038.7	47071.8	56035.7	28181.7	49974.6	46536.7	51175.5	38892.4	43560	89431.3	75822.2	79522.1	69677.6
P05108	CYP11A1	Cholesterol side-chain cleavage enzyme, mitochondrial	CP11A_HUMAN	NaN	NaN	NaN	1504.11	NaN	NaN	NaN	NaN	NaN	NaN	NaN	NaN	2545.06	NaN	NaN	NaN	NaN	NaN	1221.17	NaN	NaN	NaN	NaN	NaN	NaN	NaN	NaN	1449.18	1.27139	NaN	1.03778	NaN	1.08332	NaN	1.21631	NaN	1.07838	NaN	NaN	NaN	NaN	NaN	1	NaN	NaN	1.31998
P05109	S100A8	Protein S100-A8	S10A8_HUMAN	4311642	2.03561e+06	4.479e+06	1.81986e+06	649653	804360	2.88873e+06	2.49789e+06	1.46446e+06	4413862	1.25585e+06	784549	789455	4379242	1.19448e+06	2.32688e+06	1.06818e+06	1.97918e+06	3.46131e+06	2.18079e+06	2001762	3.22278e+06	1.14098e+06	1.51568e+06	1.16149e+06	5152640	2359799	1.07318e+06	1853981	721926	1.70269e+06	839622	6700808	1.52133e+06	1.91983e+06	3016029	2.93648e+06	1.88109e+06	4487451	1.16636e+06	4283667	4.79826e+06	2.67455e+06	21132236	1.59813e+06	2.08857e+06
P05120	SERPINB2	Plasminogen activator inhibitor 2	PAI2_HUMAN	NaN	NaN	NaN	NaN	NaN	NaN	1	23516.7	NaN	NaN	NaN	NaN	NaN	NaN	NaN	NaN	NaN	NaN	NaN	NaN	NaN	NaN	NaN	NaN	NaN	NaN	NaN	NaN	NaN	NaN	NaN	NaN	NaN	NaN	NaN	NaN	NaN	73627.1	1.35088	NaN	NaN	NaN	NaN	1.03556	NaN	NaN
P05121	SERPINE1	Plasminogen activator inhibitor 1	PAI1_HUMAN	1.39363	17296	7447.65	1353.6	8395.76	26743.3	22689	8527.82	8689.43	4692.4	5746.72	2170.17	1.05133	1.48829	29371.8	6354.83	NaN	8955.03	1363.84	5763.71	11381.3	9017.9	485.82	4834.31	3839.46	1.49743	NaN	1.64861	NaN	2793	NaN	1.13404	5916.36	1350.42	14002.8	NaN	NaN	2069.25	3178.62	3377.6	17022.2	NaN	7264.24	NaN	835.936	11738.8
P05141	SLC25A5	ADP/ATP translocase 2	ADT2_HUMAN	NaN	NaN	NaN	NaN	NaN	NaN	NaN	NaN	NaN	NaN	NaN	NaN	NaN	NaN	NaN	NaN	NaN	NaN	NaN	NaN	NaN	NaN	NaN	NaN	NaN	NaN	NaN	NaN	NaN	NaN	NaN	NaN	NaN	NaN	NaN	NaN	NaN	52047.4	NaN	NaN	NaN	NaN	NaN	NaN	NaN	NaN
P05154	SERPINA5	Plasma serine protease inhibitor	IPSP_HUMAN	1.58666e+06	330930	1.50144e+06	124187	1.58004e+06	1.36171e+06	1.53408e+06	109919	114646	691286	1.78926e+06	840147	1.72118e+06	1.72946e+06	1.73174e+06	875201	1.36466e+06	1.20919e+06	1.06511e+06	1.21115e+06	728344	1.0649e+06	2.31186e+06	2.55118e+06	1.83855e+06	1755334	1.93422e+06	2.18675e+06	1.57745e+06	2.00492e+06	1.21231e+06	2.22683e+06	1.11806e+06	1.40628e+06	255471	785407	1.29773e+06	1096935	1.73881e+06	1.379e+06	1623701	1.195e+06	1.19143e+06	1106407	1.13641e+06	1.48464e+06
P05155	SERPING1	Plasma protease C1 inhibitor	IC1_HUMAN	85350248	69607616	72357160	82221608	108551568	56443604	76806536	40973228	120452016	86610336	61919036	59821776	64257508	76294200	49016960	104392264	36706916	158336304	64670044	75732384	63354936	86116536	79145552	75531864	62560724	76657600	80611824	58222088	95806664	113203232	80063264	73994632	103872184	95574320	83983704	94449032	78557960	72218960	89901160	78554432	73727112	108754944	106548008	77488952	50848832	53756084
P05156	CFI	Complement factor I	CFAI_HUMAN	49162460	32106612	33897736	45113944	31169702	31436752	41689608	33041590	31720240	43662720	38338044	35455140	32743232	54443880	36806784	54367264	20525728	41701896	36435416	38798956	37755376	37276880	37757656	32571834	33441838	53746864	32853536	40769800	34264336	34767616	38183892	39367708	45020360	44305832	49000680	51090280	37365100	37685936	53849060	41970416	40099400	49541332	39041292	48124304	29005268	37578672
P05160	F13B	Coagulation factor XIII B chain	F13B_HUMAN	9332433	10537449	7.15304e+06	10535599	5.46132e+06	8510627	6736377	9371792	6778207	3982493	8057033	6733131	16161103	8889248	43911624	5957825	10404243	9291077	8184471	9340531	5905085	8393783	9537694	13732584	8.25288e+06	10440478	17516328	15890943	7992523	7532659	15802432	7484696	6.23648e+06	7.50358e+06	9945508	3111596	7.91368e+06	6.46735e+06	8.01201e+06	11555547	9146901	11972898	5.22359e+06	6.99116e+06	11320514	8513746
P05161	ISG15	Ubiquitin-like protein ISG15	ISG15_HUMAN	NaN	NaN	NaN	NaN	NaN	NaN	NaN	NaN	NaN	NaN	NaN	NaN	NaN	NaN	NaN	NaN	NaN	NaN	NaN	NaN	NaN	NaN	NaN	NaN	NaN	NaN	NaN	NaN	NaN	NaN	NaN	NaN	NaN	NaN	NaN	NaN	NaN	NaN	NaN	NaN	NaN	NaN	NaN	NaN	NaN	NaN
P05164	MPO	Myeloperoxidase	PERM_HUMAN	79740.4	31964.2	46694.5	60731.8	14740.6	33484.7	60115	39759.1	25121.8	93747.7	51788.6	58314	47245.9	63885	14475.6	41333	18017.8	78112.1	59506.9	56429.1	36750.4	71175.2	22312.9	27623.7	70998	77510.8	35082.4	48159.8	48014.1	35327.1	39717	39034.9	67610	52439.3	75167.9	103350	26805.3	38100.1	60429	43005	29046	66279.9	55955.3	260295	17031.7	42242.8
P05165	PCCA	Propionyl-CoA carboxylase alpha chain, mitochondrial	PCCA_HUMAN	NaN	NaN	NaN	NaN	NaN	NaN	NaN	1.21511	NaN	1	NaN	7612.62	NaN	NaN	NaN	NaN	NaN	NaN	NaN	NaN	10803.6	NaN	NaN	NaN	NaN	NaN	NaN	NaN	NaN	NaN	NaN	NaN	NaN	NaN	NaN	NaN	NaN	NaN	NaN	NaN	NaN	NaN	NaN	NaN	NaN	NaN
P05166	PCCB	Propionyl-CoA carboxylase beta chain, mitochondrial	PCCB_HUMAN	1.39363	NaN	NaN	15485.8	NaN	74099.9	NaN	5749.99	NaN	NaN	NaN	18562.8	NaN	NaN	NaN	1	NaN	NaN	21723.5	NaN	15969	1	NaN	1	NaN	NaN	NaN	NaN	NaN	NaN	NaN	51858.1	NaN	NaN	1.21629	2565.66	NaN	1	NaN	NaN	61896.3	1.61184	12313.4	1.03556	6032.74	12618.9
P05186	ALPL	Alkaline phosphatase, tissue-nonspecific isozyme	PPBT_HUMAN	31654.2	17438.9	18703.3	15022	1.23112	13651.8	11684.4	15938.4	14193.6	11203.5	40269.8	20304.6	11136.2	40454.6	8757.74	26893.5	33707.3	13876.4	24035.7	10668	264985	23870	18108.4	6380.26	14317.9	36379.7	122200	46296.3	31280.1	21416.6	22305.3	18420.6	25939.5	17832.2	14427.8	28650.5	23107.3	10560.9	23160.3	31153.3	30057.7	39174.4	8108.15	59000.9	25176.9	15050.1
P05362	ICAM1	Intercellular adhesion molecule 1	ICAM1_HUMAN	723507	542802	504819	528111	254053	504930	322380	568924	684035	746925	465185	968311	442375	914736	714434	649804	773944	357123	476103	474374	1.29924e+06	756456	474562	438324	487369	862588	1.6817e+06	686302	552414	382783	765161	384039	674038	535235	459743	635225	397971	570315	671174	1.26848e+06	479910	854616	809112	889532	652640	608338
P05386	RPLP1	60S acidic ribosomal protein P1	RLA1_HUMAN	NaN	NaN	1	1.30707	NaN	NaN	1	NaN	2.70596	NaN	1	NaN	NaN	NaN	NaN	1	4.31492	NaN	NaN	NaN	17425.4	1	NaN	1	NaN	NaN	NaN	NaN	1.27139	NaN	NaN	1.13403	1.08332	NaN	1.21631	1.08169	1.07838	45153.3	1.35086	NaN	1.14119	NaN	1	NaN	NaN	1.31998
P05387	RPLP2	60S acidic ribosomal protein P2	RLA2_HUMAN	14993.8	NaN	18071	6704.85	NaN	5978.95	14782.1	10674.7	NaN	27515.4	NaN	22925	NaN	1.48831	14415.1	16896.4	NaN	NaN	21667.2	NaN	214921	78210.3	3663.92	NaN	NaN	NaN	19417	NaN	44345	NaN	9247.72	8918.55	67437.3	NaN	NaN	NaN	24482.5	125873	13796.6	3569.35	NaN	181944	87067.2	58527.8	35890.8	NaN
P05388	RPLP0	60S acidic ribosomal protein P0	RLA0_HUMAN	NaN	NaN	NaN	NaN	NaN	NaN	NaN	NaN	NaN	NaN	NaN	NaN	NaN	NaN	NaN	NaN	NaN	NaN	NaN	NaN	27372.2	NaN	NaN	NaN	NaN	NaN	NaN	NaN	NaN	NaN	NaN	NaN	4882.99	NaN	NaN	NaN	NaN	8114413	NaN	NaN	NaN	NaN	NaN	NaN	NaN	NaN
P05413	FABP3	Fatty acid-binding protein, heart	FABPH_HUMAN	36982.3	NaN	1001.54	88445.5	NaN	7596.53	1143.64	398241	2.70598	14879.5	NaN	914002	NaN	3338.96	NaN	1	NaN	NaN	1	NaN	NaN	NaN	NaN	NaN	NaN	128798	NaN	NaN	16011.6	NaN	NaN	272422	NaN	NaN	NaN	NaN	35046.1	NaN	457285	NaN	36604.7	NaN	133110	14211.4	420.817	3119.44
P05451	REG1A	Lithostathine-1-alpha	REG1A_HUMAN	286694	143762	200113	97961.8	62076.9	172566	80165.5	112737	282206	394424	129975	469002	83155.7	346621	265049	222935	434294	53392.6	228455	76574	69755.9	228756	192461	133937	151958	352696	473469	221188	182364	70602.2	254574	198235	133254	307508	174269	60556.4	456807	89829.8	330082	219977	107306	417623	214327	548075	166539	464712
P05452	CLEC3B	Tetranectin	TETN_HUMAN	1.36937e+06	1.88892e+06	1.25593e+06	1.59144e+06	2729238	1.1025e+06	1.24559e+06	639996	1.02856e+06	412620	1.84058e+06	789779	1.75145e+06	1.39888e+06	1765888	740195	3.16717e+06	2583486	843572	949918	911847	435500	1.01155e+06	2.38572e+06	1.13166e+06	1.47226e+06	1.06341e+06	1.73929e+06	1082583	1.77618e+06	879824	1.24536e+06	581529	629223	650739	667634	665301	861778	1.2483e+06	416174	1.17646e+06	603066	1.00903e+06	444450	980135	623430
P05543	SERPINA7	Thyroxine-binding globulin	THBG_HUMAN	27049302	15079689	12314228	24609628	6.21971e+06	19308906	17734748	18961374	5.91551e+06	15969945	19741858	23171514	17423458	30042208	19899580	22476202	66905300	8703975	17494280	19403564	20691050	17363410	20310136	12913749	17379868	33113708	30412150	37345368	16453530	11068040	18761470	23712192	22684982	21913258	24720236	20936202	16936598	12434200	28402364	17578216	19773128	31488736	19069278	16596242	20280928	22691294
P05546	SERPIND1	Heparin cofactor 2	HEP2_HUMAN	55086560	71978544	38513428	58747352	28368120	39611208	53737480	40267780	25352574	47383168	36781436	49853576	53734164	58221936	80104760	43487228	36910152	43393360	47639612	46302544	43634968	49848844	51793948	46401784	55584504	65021136	66768768	47924528	73464128	42042068	50079120	43483244	56515952	57521260	53531960	51070100	40122344	53305236	63586732	29653346	45097648	55801608	55238832	61564960	60823576	51842056
P05556	ITGB1	Integrin beta-1	ITB1_HUMAN	211690	295218	213062	232520	269969	265789	227488	192123	295597	242776	282583	315084	139695	238081	211340	215362	358786	248652	230819	225004	250599	288988	247301	233559	322806	271105	228295	321552	188264	315169	285515	258272	222493	295168	325863	267919	187076	252729	225393	302926	251983	298335	208152	263960	371994	259169
P05787	KRT8	Keratin, type II cytoskeletal 8	K2C8_HUMAN	NaN	NaN	NaN	NaN	NaN	NaN	NaN	NaN	NaN	10944.3	NaN	NaN	NaN	NaN	NaN	NaN	NaN	NaN	12603.8	NaN	132597	NaN	NaN	NaN	NaN	NaN	NaN	NaN	NaN	NaN	NaN	NaN	NaN	NaN	NaN	NaN	NaN	NaN	NaN	NaN	NaN	NaN	NaN	10982.9	NaN	NaN
P05976	MYL1	Myosin light chain 1/3, skeletal muscle isoform	MYL1_HUMAN	NaN	NaN	1	NaN	NaN	NaN	NaN	49.5521	2.70598	1	7070.87	NaN	NaN	NaN	NaN	NaN	NaN	1.03068	NaN	1	1.19808	2119.02	26013	NaN	1.27012	NaN	1.14763	6646.18	NaN	1	NaN	1.13404	NaN	1.23583	1.21629	NaN	NaN	NaN	NaN	2885.29	NaN	NaN	1	7273.51	NaN	NaN
P05981	HPN	Serine protease hepsin	HEPS_HUMAN	NaN	NaN	NaN	NaN	NaN	NaN	NaN	NaN	NaN	NaN	NaN	NaN	NaN	NaN	NaN	NaN	NaN	NaN	NaN	NaN	NaN	NaN	NaN	NaN	NaN	NaN	NaN	NaN	NaN	NaN	NaN	NaN	NaN	NaN	NaN	NaN	NaN	NaN	NaN	NaN	NaN	NaN	NaN	NaN	NaN	NaN
P05997	COL5A2	Collagen alpha-2(V) chain	CO5A2_HUMAN	NaN	918771	NaN	410560	NaN	NaN	NaN	NaN	NaN	2.0449e+06	NaN	NaN	NaN	NaN	NaN	NaN	NaN	NaN	787986	NaN	NaN	NaN	NaN	NaN	NaN	NaN	NaN	NaN	855212	NaN	NaN	840548	749683	1.57995e+06	NaN	1.20392e+06	1.92716e+06	NaN	NaN	NaN	NaN	NaN	NaN	NaN	NaN	359948
P06132	UROD	Uroporphyrinogen decarboxylase	DCUP_HUMAN	5443.14	15615.1	9466.57	10961.1	NaN	18508.3	4966.19	5757.17	NaN	12150.9	NaN	1.04698	4582.85	NaN	NaN	1	NaN	NaN	1	NaN	1.19808	NaN	NaN	1	1.27012	NaN	NaN	NaN	3845.65	1	NaN	NaN	4003.27	NaN	NaN	NaN	1506.9	1	NaN	NaN	3365.37	NaN	3582	9997.76	1.65535	NaN
P06133	UGT2B4	UDP-glucuronosyltransferase 2B4	UD2B4_HUMAN	NaN	NaN	NaN	NaN	201832	NaN	163636	28283.6	146946	1.93105e+06	NaN	NaN	NaN	NaN	NaN	NaN	NaN	NaN	836665	NaN	91282.6	458696	182819	96966.9	NaN	NaN	228980	NaN	NaN	NaN	107167	96626.2	341140	382412	NaN	175240	NaN	65434336	NaN	31393.8	239546	49808.9	40138.7	140280	909232	NaN
P06213	INSR	Insulin receptor	INSR_HUMAN	NaN	NaN	NaN	NaN	NaN	NaN	NaN	NaN	NaN	1978.88	NaN	NaN	NaN	NaN	NaN	NaN	NaN	NaN	NaN	NaN	NaN	NaN	17.8653	NaN	NaN	1.49743	1.14763	NaN	NaN	NaN	NaN	1.13403	NaN	NaN	NaN	NaN	NaN	1	NaN	NaN	NaN	NaN	NaN	1924.37	NaN	NaN
P06239	LCK	Tyrosine-protein kinase Lck	LCK_HUMAN	NaN	15640.8	10706.8	NaN	NaN	NaN	NaN	21137.8	204140	1	NaN	8961.8	11931.5	127621	23262.5	136172	NaN	NaN	NaN	81957.2	38795.1	100583	102845	106716	95108.3	59600.8	82777	15055	149550	NaN	69969.8	85370.4	81849.6	63223.3	156644	96158.5	91312.7	89055.4	78326	74752.3	83968.7	84111.2	117720	82185.2	102254	98808.4
P06276	BCHE	Cholinesterase	CHLE_HUMAN	10456092	13750402	6.87342e+06	15394795	6.11883e+06	10097344	12554849	13177522	9610019	5396049	8573074	5973404	8.3421e+06	10198277	16806424	8868658	20082790	6407728	8514045	8.16223e+06	8.34375e+06	8616358	6.47885e+06	9990703	14354027	11401149	11048375	14961759	11185573	6.19205e+06	8419888	10616942	9442126	8306154	11594307	6.57285e+06	7.71551e+06	8622515	12173087	12606197	14137560	15747467	6365639	8.12984e+06	13109181	11784948
P06280	GLA	Alpha-galactosidase A	AGAL_HUMAN	3127.28	NaN	NaN	NaN	NaN	NaN	1	NaN	NaN	NaN	1	11221.5	NaN	NaN	NaN	NaN	NaN	12216.5	8647.49	1	6484.13	5693.67	NaN	NaN	NaN	NaN	9295.1	NaN	NaN	NaN	NaN	1.13404	NaN	NaN	NaN	NaN	NaN	26113.1	5021.96	NaN	1.14119	NaN	NaN	NaN	NaN	NaN
P06310	IGKV2-30	Immunoglobulin kappa variable 2-30	KV230_HUMAN	46910.2	30075.2	73240.8	23137.6	263792	50679.6	21418.8	31976.8	134635	NaN	69398.6	23001.1	37947	NaN	64289.6	32070.8	44028.9	586752	22746.2	NaN	5580.47	NaN	23274.1	14998.6	19978.9	57087.4	113090	93435	43426.8	201066	7350.01	51547.4	67045.4	12068.1	11234.2	37150.3	2708.91	30730.1	55431.4	11546.7	24413.2	61474.7	49234.3	116593	32490.5	14342.7
P06312	IGKV4-1	Immunoglobulin kappa variable 4-1	KV401_HUMAN	966816	642115	2.69063e+06	611497	13824412	929570	1.27258e+06	778632	7.16069e+06	701996	1.15985e+06	629170	994819	996293	1.06941e+06	1.77675e+06	519036	35891232	951366	1.2204e+06	375692	923964	729377	1.07606e+06	1.79027e+06	1.05161e+06	1675729	1.7551e+06	1.82461e+06	7.72983e+06	1120527	1.32091e+06	3333470	463347	926429	1.23209e+06	515493	761859	1.11556e+06	1.54749e+06	1.03923e+06	1442258	2749445	1.06164e+06	1.28271e+06	1170996
P06331	IGHV4-34	Immunoglobulin heavy variable 4-34	HV434_HUMAN	537790	356118	962347	406957	5.12127e+06	669033	360260	365241	678781	299453	312060	359859	129080	592820	682538	734770	1.00229e+06	9805952	284706	202715	150860	278244	259337	345042	587920	447515	820183	1.19231e+06	521853	1.83928e+06	200946	750010	1.49445e+06	316494	373029	460130	205518	533796	336982	620318	381001	519066	1.12425e+06	258450	556838	340515
P06396	GSN	Gelsolin	GELS_HUMAN	116148704	93692632	65521080	84612432	53935812	99717776	56301040	74622360	54262472	76535640	121097464	86569704	86884288	130756384	87727056	71671976	121870928	42562796	76437152	95957392	76252496	85745240	109387432	70431424	124343016	133040536	76104912	76794288	62736620	66637092	96360920	99125680	77529320	100248984	110680064	64809140	85237816	58771372	105386800	76548976	78636832	86197480	70851776	77348800	135139728	85696952
P06454	PTMA	Prothymosin alpha	PTMA_HUMAN	NaN	NaN	NaN	NaN	NaN	1655.6	677.255	NaN	11910.6	6529.36	NaN	NaN	NaN	NaN	NaN	NaN	NaN	NaN	6368.52	NaN	35601.8	6430.98	NaN	NaN	NaN	NaN	NaN	1.64861	NaN	NaN	NaN	NaN	4869.38	1033.74	NaN	1859.13	NaN	NaN	NaN	NaN	NaN	6893.74	2982.41	2813.92	NaN	NaN
P06576	ATP5F1B	ATP synthase subunit beta, mitochondrial	ATPB_HUMAN	NaN	8868.24	NaN	8212.59	NaN	9969.1	NaN	8630.92	NaN	NaN	NaN	27696.4	NaN	NaN	NaN	11451.5	NaN	NaN	NaN	NaN	8738.98	NaN	NaN	NaN	NaN	NaN	NaN	NaN	NaN	NaN	NaN	NaN	NaN	NaN	11871.9	NaN	NaN	121938	1.35086	1	11962.3	NaN	NaN	NaN	15005.6	960.165
P06681	C2	Complement C2	CO2_HUMAN	10175387	14385585	10588417	12681989	11481262	10455014	11857279	11169480	8814046	16702567	12638737	13952284	9721263	12408364	12110588	17475102	10141402	10743456	12089567	11223515	10254450	13817222	13111842	12118117	10930631	11284898	9636077	9240236	11139326	11892506	12223420	14153260	17570324	18442764	15423242	23715520	11567421	14204414	14441300	13850395	10706647	17473552	12036488	18258386	9860884	11412684
P06702	S100A9	Protein S100-A9	S10A9_HUMAN	911921	500930	2.70842e+06	593694	336410	343377	1.95037e+06	1.20655e+06	904962	2678103	528076	282708	450042	1.09235e+06	374754	1.99595e+06	258176	1.98885e+06	1.90464e+06	703256	707690	2.06004e+06	638973	703070	671185	1.15817e+06	861066	465454	959513	581313	697803	427181	3.95044e+06	677763	874693	1746066	1.02941e+06	1.54227e+06	928660	582216	1.9913e+06	2.20469e+06	1.77563e+06	10184042	524977	748212
P06703	S100A6	Protein S100-A6	S10A6_HUMAN	300398	98132	261982	441653	142834	406851	813628	457052	75642.3	755332	287799	431268	261836	283494	464550	671742	99485.4	759111	360098	244647	213379	402732	188729	163072	502742	310309	214670	634297	806491	498179	956721	529162	197889	199862	196161	347051	1.23541e+06	247859	321964	89429.3	430437	308908	642861	274025	184404	293823
P06727	APOA4	Apolipoprotein A-IV	APOA4_HUMAN	80599088	79783928	75142080	97598936	55954124	103269184	68541328	54718616	61133056	60897732	140445120	189798016	106686632	90408664	119832672	47406340	129424424	38181856	89291912	57222628	54075836	95264392	75532032	82373408	150817120	86451280	96902040	98719152	93883344	54916804	83638720	97499232	62814900	86522600	156455408	66253268	130055920	65373796	74031656	71465656	150682928	89694016	109729960	112496960	116690320	86752752
P06731	CEACAM5	Carcinoembryonic antigen-related cell adhesion molecule 5	CEAM5_HUMAN	486327	521098	425969	458839	292826	433293	372839	423687	393469	319042	459123	745823	116892	586396	256596	411638	470064	371723	595998	218526	611411	532356	450739	247629	565498	533407	516701	705369	509434	429903	495996	350855	621074	635709	134523	550748	459268	242849	643279	744942	574266	817024	392234	321550	466282	398978
P06732	CKM	Creatine kinase M-type	KCRM_HUMAN	215797	178184	100387	528856	112622	267856	129663	169948	161602	28175.7	70303.9	110723	135865	201533	280609	50473.4	235127	46873.8	164592	85479.4	83283.1	147514	394763	99889.7	165488	204615	99267.3	114957	14306.9	116600	133757	182077	71337.7	138357	128618	55955.5	31487.4	15447.4	226383	310008	352089	295706	32355.9	17358.1	732948	119555
P06733	ENO1	Alpha-enolase	ENOA_HUMAN	128043	90103.7	116763	136378	15538.8	240357	172636	62145.7	56908	128651	44275.7	40961.3	62148.6	116186	29711.4	103734	38786.1	27028.5	104969	42628.9	259426	133077	24326	54898.1	71434.7	122092	71453.4	40550.8	114900	34276.7	39619	30769.4	271093	55571.6	121156	82963.9	78620.8	965318	115073	159433	149284	134999	81845.9	251459	176111	69429.5
P06737	PYGL	Glycogen phosphorylase, liver form	PYGL_HUMAN	17372.3	37075.4	199107	352405	32515.2	228189	143497	319480	7.42974e+06	104139	177286	319992	6931.09	20350.8	NaN	137917	NaN	364167	86676.6	209844	66083.9	259629	840528	133456	462936	11710.1	765282	329494	508997	224622	283100	130215	264818	438113	152652	110807	17671.3	57963.5	13155.6	304612	151649	491843	180723	321285	242289	300757
P06744	GPI	Glucose-6-phosphate isomerase	G6PI_HUMAN	43900.3	201158	82872.7	101121	1.23112	108384	122847	119875	NaN	60573.3	149281	17119.8	134646	42049	22286.8	7892.48	33439.8	1.03068	97602.5	166539	494464	44631.5	172132	61870.5	138795	38337.3	229538	109352	97756.3	NaN	156318	11009.3	104594	137222	26480.3	5502.14	55427.8	133746	136604	24818.8	164975	66795	9409.01	137988	167057	34265.4
P06748	NPM1	Nucleophosmin	NPM_HUMAN	NaN	NaN	NaN	NaN	NaN	NaN	10009.5	NaN	NaN	NaN	NaN	NaN	NaN	NaN	NaN	NaN	NaN	NaN	31406.3	NaN	NaN	NaN	NaN	NaN	NaN	NaN	NaN	NaN	NaN	NaN	NaN	NaN	27532.8	12289.3	12945.9	1.0817	NaN	24866.4	NaN	29370.9	NaN	24164.2	11387.2	17994.9	NaN	NaN
P06753	TPM3	Tropomyosin alpha-3 chain	TPM3_HUMAN	49569.1	74349.6	33666.1	141217	27337.2	197077	13462.1	147137	NaN	86881.2	126049	40806.7	55450.6	79981.1	2.07502	43342.9	19934.3	46151.7	46940.4	26447.1	35826.1	38144.4	68510.5	64030.4	71536	131740	74122.5	70666.6	58525.2	10588.3	46802.9	44574.6	86044.9	NaN	120490	43350.8	61327.6	200129	128451	53609.4	182584	182272	42445	103473	226709	72347.6
P06858	LPL	Lipoprotein lipase	LIPL_HUMAN	6027.32	1.81311	3608.91	NaN	19923.5	2154	1	1616.15	NaN	1834.52	549.486	NaN	NaN	NaN	6807.6	NaN	5658.64	35907.6	1889.2	2946.44	NaN	NaN	1.04107	6422.7	2035.54	5187.92	NaN	NaN	NaN	NaN	1.03778	1.13404	729.618	3699.63	2203.05	1.0817	2118.6	2715.28	7959.45	1	4982.58	2336.31	NaN	1284.48	2283.98	NaN
P06865	HEXA	Beta-hexosaminidase subunit alpha	HEXA_HUMAN	421327	62970.3	378293	77693.2	NaN	121425	9464.44	101262	23536.2	70298	835.676	74857.4	260984	514291	125325	177483	11432.1	6748.96	208703	122381	91618.1	79297.4	50379.4	165407	96660.7	797407	90504.1	182891	233060	NaN	68802.5	100150	117085	88657.7	32658.5	63027.6	36615.1	75913.4	510463	39314.9	124798	42560.7	60757.1	57357.5	119036	75612.8
P06870	KLK1	Kallikrein-1	KLK1_HUMAN	NaN	NaN	NaN	NaN	NaN	13673.5	NaN	NaN	NaN	NaN	NaN	NaN	NaN	NaN	NaN	NaN	371631	NaN	21451.4	19737.9	NaN	NaN	NaN	NaN	NaN	NaN	NaN	NaN	NaN	13482	NaN	NaN	NaN	NaN	NaN	NaN	NaN	NaN	NaN	NaN	NaN	NaN	NaN	NaN	NaN	NaN
P06899;P23527;P33778;Q16778	H2BC11;H2BC17;H2BC3;H2BC21	Histone H2B type 1-J;Histone H2B type 1-O;Histone H2B type 1-B;Histone H2B type 2-E	H2B1J_HUMAN;H2B1O_HUMAN;H2B1B_HUMAN;H2B2E_HUMAN	NaN	NaN	NaN	NaN	NaN	NaN	NaN	NaN	NaN	NaN	NaN	NaN	NaN	NaN	NaN	NaN	NaN	NaN	NaN	NaN	NaN	NaN	NaN	NaN	NaN	NaN	NaN	NaN	NaN	NaN	NaN	NaN	NaN	NaN	NaN	NaN	NaN	59839.5	NaN	NaN	NaN	NaN	NaN	NaN	NaN	NaN
P07099	EPHX1	Epoxide hydrolase 1	HYEP_HUMAN	NaN	NaN	NaN	NaN	NaN	NaN	NaN	NaN	NaN	NaN	NaN	61996	NaN	NaN	NaN	NaN	NaN	NaN	NaN	NaN	6795.98	NaN	NaN	NaN	NaN	NaN	NaN	NaN	NaN	NaN	NaN	75010.4	NaN	NaN	NaN	NaN	NaN	NaN	NaN	NaN	NaN	NaN	NaN	NaN	NaN	NaN
P07108	DBI	Acyl-CoA-binding protein	ACBP_HUMAN	1.39363	1.81311	74612.1	95764.4	NaN	100094	64852.6	62082.3	2.706	38831.2	55576.3	43508.7	29035.9	59354.6	41776.2	49490	26075.3	128080	56933.8	36911.8	211346	68786.4	23491.8	118945	74982.1	NaN	62433.7	26084.8	55474.7	31959.5	51338.4	61056.9	22970.3	42680.4	57661.5	76900.2	118858	43813	11678.5	29022.1	69915.8	22902.8	27112.4	96673.6	79044.1	53504.3
P07148	FABP1	Fatty acid-binding protein, liver	FABPL_HUMAN	158371	114571	142739	180099	95264.9	97820.1	183728	138468	54806.5	99683.5	127123	184688	142210	284261	73433.4	110011	149976	576182	182777	80550.5	224159	174067	221310	121368	348550	222939	80347.7	89691	123348	172317	128084	114217	82113.8	116812	158720	14247.9	218056	140344	259510	130273	176504	229781	110066	207128	106225	141483
P07195	LDHB	L-lactate dehydrogenase B chain	LDHB_HUMAN	1185351	1.32363e+06	844808	1.23347e+06	460452	1.89479e+06	1472443	908398	776001	1.29814e+06	970832	970247	573689	1.37265e+06	1.02612e+06	732605	2.86275e+06	604329	1.00774e+06	1.14134e+06	1.13385e+06	1.05858e+06	1076770	819625	962698	1.3212e+06	939244	1.51848e+06	1.40583e+06	579559	1.14096e+06	1.26955e+06	1.3284e+06	863034	1511449	1.05223e+06	1.51306e+06	733254	1.21574e+06	1.59183e+06	660384	2.07366e+06	843623	1491028	2313289	1.19529e+06
P07203	GPX1	Glutathione peroxidase 1	GPX1_HUMAN	38673.7	3686.88	21687.2	17428.6	NaN	69247.4	88897.9	59444	NaN	52389.2	19945.5	36358.4	4874.38	28548.6	169785	29367.1	NaN	1.03068	26422.2	11186.9	9222.71	23983.4	4784.83	14351.3	24238.4	52681.8	9649.83	25647.7	65483	39901.3	46400.6	23257.3	6269.88	204794	8392.42	4073.59	101793	15767.7	36937.9	17223.5	44340.7	23257.9	37220.4	27181.8	43399.9	20509.6
P07204	THBD	Thrombomodulin	TRBM_HUMAN	NaN	NaN	NaN	NaN	NaN	NaN	1	NaN	NaN	NaN	1	1.04698	1.05133	NaN	NaN	NaN	353188	NaN	NaN	NaN	NaN	NaN	NaN	NaN	NaN	NaN	NaN	1.64862	NaN	NaN	NaN	NaN	NaN	NaN	1.21629	NaN	NaN	1	NaN	NaN	NaN	NaN	1	NaN	NaN	10525.4
P07225	PROS1	Vitamin K-dependent protein S	PROS_HUMAN	35093268	35732816	26648998	36550640	22956576	25947360	25919586	27951618	33225348	29030748	14372612	18298792	30479408	39334328	27733520	33615180	11244600	23568360	26870416	39297084	20921772	27381432	32316598	29918286	32960898	39346460	35607320	20406730	38688056	31194042	30515936	23224986	30679316	28061822	32144404	31300298	27184134	30516932	37144272	30702472	35518992	22305864	29433172	37823220	26252088	29571344
P07237	P4HB	Protein disulfide-isomerase	PDIA1_HUMAN	207863	187265	144910	179282	2.47032e+06	179596	160625	356749	1.23229e+06	167534	193400	278104	146625	187456	309060	102244	92135.6	6811563	175332	102606	318134	160271	125525	170808	130666	232013	185755	113475	127022	118498	196332	164476	170571	132308	145808	211447	134651	193832	223560	139895	186586	378416	149868	230396	152535	177995
P07288	KLK3	Prostate-specific antigen	KLK3_HUMAN	NaN	NaN	NaN	NaN	NaN	NaN	NaN	NaN	NaN	NaN	NaN	NaN	1.05133	NaN	NaN	NaN	NaN	NaN	1	NaN	NaN	NaN	NaN	NaN	NaN	NaN	25036.4	NaN	NaN	NaN	NaN	6979.54	NaN	NaN	NaN	NaN	NaN	6114.34	12528.3	NaN	NaN	NaN	NaN	1.03556	1.65535	NaN
P07307	ASGR2	Asialoglycoprotein receptor 2	ASGR2_HUMAN	279306	207753	230339	189545	192797	220483	161103	282984	384568	144892	221978	273942	113329	282959	116336	208407	145338	195067	149370	189099	182474	263554	258882	126990	174501	321126	184423	129210	229944	124303	195715	161354	237687	108130	96512.8	229618	284898	145334	257231	229137	177266	191317	504260	441823	145171	161031
P07311	ACYP1	Acylphosphatase-1	ACYP1_HUMAN	NaN	NaN	NaN	NaN	NaN	NaN	9165.89	NaN	NaN	NaN	NaN	NaN	NaN	NaN	NaN	NaN	NaN	NaN	NaN	4357.37	1.19808	NaN	NaN	NaN	NaN	NaN	NaN	NaN	NaN	NaN	NaN	NaN	NaN	12239.2	NaN	NaN	7878.47	NaN	NaN	NaN	1.14119	NaN	NaN	NaN	NaN	NaN
P07327	ADH1A	Alcohol dehydrogenase 1A	ADH1A_HUMAN	154330	10722.5	145754	80873.7	24794.5	126597	170696	153173	357172	10935.3	70618.7	275439	5275.51	22293.5	174400	22074	103144	272860	120760	95208.5	145763	132991	129013	121996	182619	148676	NaN	19749.7	188843	567091	132107	139599	142906	13996.8	136094	12768.9	145353	127602	154489	90549.9	119649	137223	172832	150545	235900	137062
P07333	CSF1R	Macrophage colony-stimulating factor 1 receptor	CSF1R_HUMAN	384929	465268	328925	296563	367301	309043	423405	301936	378912	384427	429880	471011	208648	413267	252918	357827	356691	297745	309657	232004	396851	333782	357139	227336	238284	374065	233428	437445	246781	336110	393879	396995	280055	296214	408478	355916	212283	332385	406743	528822	249798	469533	309041	567046	453814	707901
P07339	CTSD	Cathepsin D	CATD_HUMAN	703401	606202	427199	683638	103417	388743	444064	525266	363344	806512	441338	2.6377e+06	418775	737533	617892	337309	692502	156713	525321	272888	1.31006e+06	507472	384535	563885	344317	819366	470327	367888	276708	198082	315750	510191	596084	552390	357564	963755	481035	1.07328e+06	737115	472402	471152	706553	409912	481680	401081	481808
P07355	ANXA2	Annexin A2	ANXA2_HUMAN	2.57315e+06	2.18217e+06	NaN	502006	26577.9	231745	7.51244e+06	225072	998341	34085.3	2.14405e+06	180281	34903544	507.12	55282136	2.06889e+06	1745001	217939408	90906.8	3.89896e+06	1503887	5772332	36036	320350	NaN	314777	16895.6	8115683	NaN	649682	8498.27	836.548	NaN	855058	3690.96	32097.5	2835.96	994634	3849.24	1	481329	NaN	201422	20741.3	526080	1.31998
P07357	C8A	Complement component C8 alpha chain	CO8A_HUMAN	18594220	14297879	14931296	17651566	13972493	13443797	13863299	13605672	10412210	20603640	14701051	12178881	18932828	21403826	17195196	20329634	11051295	15752559	15780632	22400898	10720702	15553573	13947952	14123806	14896048	21859246	15266720	9139511	17416178	12923699	14844144	15989942	19112996	18127496	20370410	26092148	11159299	15040729	19189304	11362046	13816685	11228960	19872402	13986360	12803429	12757522
P07358	C8B	Complement component C8 beta chain	CO8B_HUMAN	11628634	10335764	13036346	10449636	11993113	7.96804e+06	11943913	8043800	10513141	12105355	7.94757e+06	6056975	10435322	15061788	11204129	17649480	6667957	16133343	11865854	16830550	9429932	11282224	9747887	13466572	10322952	15976611	12166409	6606507	17965984	11306307	11043218	11328018	17263792	12772218	12891013	17802914	7.7047e+06	11176275	13273256	7996157	10774570	8123430	14575346	8903054	7044613	8.22654e+06
P07359	GP1BA	Platelet glycoprotein Ib alpha chain	GP1BA_HUMAN	4681160	4335557	2584470	3.88553e+06	3.29987e+06	4536041	2.29546e+06	4355825	4.08436e+06	3.59905e+06	4.4189e+06	2.935e+06	2.7158e+06	4553839	3.15963e+06	4.45688e+06	10787943	3.34696e+06	3.63015e+06	3.09343e+06	4.50464e+06	4.08597e+06	4.98851e+06	2.48961e+06	3.32142e+06	4922540	3.32388e+06	5.76377e+06	5013996	2.27619e+06	4.53893e+06	2.87637e+06	3083992	3.59469e+06	4048789	6861523	2.83599e+06	3.06348e+06	4.48792e+06	4296936	5331836	6.16658e+06	3906813	7.59606e+06	4.93847e+06	5.87129e+06
P07360	C8G	Complement component C8 gamma chain	CO8G_HUMAN	13226119	11120311	11603974	12041041	8.32974e+06	9243446	10383265	9585286	10353193	12260307	10483236	8038180	12882785	12201913	10896807	17020028	5820742	10366916	10866334	16387555	7292827	11559359	9004176	11577608	9866442	13191188	10828121	5.07937e+06	12354505	8521929	11908006	11893671	14026610	12232857	12574608	16465961	7821728	9594824	12983266	8026104	10059638	6613543	14728933	9349428	7.43052e+06	9078553
P07384	CAPN1	Calpain-1 catalytic subunit	CAN1_HUMAN	14681.8	63848.8	39922.1	81642	41040.4	126033	64506.6	42004.8	22158.2	65133.7	48268	15334	6473.38	44827.8	2.07502	12800.3	274309	44042.5	23193.9	17367.6	72242	35384.5	9197.65	19496.7	41169.1	19343.1	19898.5	7521.26	47597	30033.3	39786.4	15366.2	60698.3	21969.4	71612.2	29839.6	91285.7	230973	29286.8	53535.5	59621.7	10089.4	32297.7	63065.4	51386.9	38194.7
P07437	TUBB	Tubulin beta chain	TBB5_HUMAN	NaN	NaN	NaN	NaN	NaN	14596.5	1	NaN	NaN	13038.7	NaN	NaN	NaN	NaN	NaN	NaN	4.31492	NaN	NaN	NaN	NaN	NaN	NaN	14056.4	1.27012	1.49742	NaN	NaN	NaN	NaN	NaN	NaN	NaN	NaN	NaN	NaN	1.07838	43698.4	NaN	NaN	529.574	NaN	NaN	1020.2	36620.5	NaN
P07451	CA3	Carbonic anhydrase 3	CAH3_HUMAN	31302.9	67637.6	27776.9	158420	20239.5	41756.9	85331.1	38754.8	58551.5	42110.2	48626.5	21003.3	33529.2	38388.9	28037.5	22155.5	235676	16680.4	71205.3	50557.6	35997.3	18389.5	47432.6	9633.64	88687.2	43249.2	19622.1	74891.9	26891.6	31766.5	44477.1	59166.7	39345.3	69760.5	13918.9	24456.9	146905	21462.1	36086	59211.8	47227.8	54239.4	58464	35871.4	70420.9	14372.6
P07476	IVL	Involucrin	INVO_HUMAN	11664.5	NaN	1	NaN	NaN	3852.68	NaN	30713.1	NaN	NaN	NaN	6283.07	NaN	NaN	NaN	967.813	NaN	NaN	1	NaN	NaN	NaN	1119.6	NaN	NaN	NaN	NaN	NaN	NaN	NaN	NaN	NaN	NaN	NaN	NaN	NaN	NaN	299433	NaN	NaN	10562.1	NaN	1	4696.19	NaN	NaN
P07477	PRSS1	Serine protease 1	TRY1_HUMAN	75051.8	103080	148781	113761	100742	150567	NaN	NaN	NaN	203285	172094	NaN	1.05133	238401	NaN	NaN	87440.6	172710	179757	NaN	631279	128180	178346	68234.7	287391	87945.5	305726	110949	147945	223582	182642	NaN	228260	227592	91713.2	61476.4	165357	102113	208978	238516	94062.7	250612	190986	215490	132097	102414
P07478	PRSS2	Trypsin-2	TRY2_HUMAN	275541	75680.2	67931.1	400466	202449	312582	73493.8	181701	64072.9	59029.3	131131	473249	16561.7	57817.7	795765	30957.8	129148	1.03068	79044.6	80960.5	120362	226450	84918	72834.2	144855	152306	113822	159589	49509.2	716471	112515	61397.3	36464.3	122214	150566	153128	120031	99102.7	148391	471447	112447	205648	112329	779191	47256	160911
P07492	GRP	Gastrin-releasing peptide	GRP_HUMAN	NaN	NaN	NaN	NaN	NaN	NaN	NaN	NaN	NaN	NaN	NaN	NaN	NaN	NaN	NaN	NaN	NaN	NaN	NaN	NaN	NaN	NaN	NaN	NaN	NaN	NaN	NaN	NaN	NaN	NaN	NaN	NaN	NaN	NaN	NaN	NaN	NaN	NaN	NaN	NaN	NaN	NaN	NaN	NaN	NaN	NaN
P07585	DCN	Decorin	PGS2_HUMAN	NaN	NaN	NaN	NaN	NaN	34264.2	4240.39	1.21511	NaN	6258.69	NaN	26127.2	7353.33	1.48831	NaN	NaN	NaN	NaN	9528.59	NaN	6757.12	8812.82	NaN	NaN	NaN	13650.3	NaN	NaN	6610.58	NaN	1.03778	1.13403	NaN	1.23584	NaN	3165.45	4569.33	NaN	1.35088	NaN	8432.81	1.61184	NaN	4948.68	6540.23	NaN
P07602	PSAP	Prosaposin	SAP_HUMAN	125435	109605	103321	86361.5	80820.2	192891	79126.5	165829	86058.5	157931	144175	200204	123931	130469	126001	127485	209298	74533.5	135640	68906.4	241868	122881	146809	63580.9	106872	119122	135816	163604	81468.1	98829.7	138363	88569	160355	145004	102594	119052	137114	55721.1	159153	186581	138539	156741	170093	254152	147207	143933
P07686	HEXB	Beta-hexosaminidase subunit beta	HEXB_HUMAN	96055.3	96096.6	35913.1	60432.7	34909.6	69760.2	54928.7	87645.4	47300.7	74828	46869.9	95380.8	50690.6	97050.3	30339	68481.1	74828.8	49802.3	53693.5	36084.3	108851	61699.1	93763.4	45484.7	59576.3	137173	50732.3	94051.4	39094.7	25927.3	32044.7	53428.7	69529.5	61308.4	26709	117928	58831.1	89288.4	107258	66720.1	37816.7	108377	63890.9	43551.5	90174.5	61379.1
P07711	CTSL	Procathepsin L	CATL1_HUMAN	32332.1	40281.5	61644.6	35522	61288.5	33597.1	42290.6	57360.7	72415.8	69188	28246.8	15637.8	17341	56929.7	32915.2	40129.8	62868.8	83380.8	88459.1	48869.2	58781.7	29342.6	57950.7	72354.3	55532.7	98355.3	60019	108812	45630.8	56832.2	47273.5	36739.7	40707.7	51230.8	44206.7	103909	47581.7	84689.7	60454.1	21341.5	40376.1	62987.6	39027.5	25677.7	35693	48633.5
P07737	PFN1	Profilin-1	PROF1_HUMAN	889375	1.78863e+06	711908	3025438	980047	4.73048e+06	383320	1.47905e+06	175897	952445	151407	369316	334846	933068	383928	220476	671916	222150	782894	192067	359023	764342	198792	337883	672655	906497	403364	270275	276260	122683	324821	164790	1.58058e+06	220112	2.52765e+06	501656	455095	563718	939956	900540	2622783	1.08752e+06	238441	2.05235e+06	3.83597e+06	1.29061e+06
P07738	BPGM	Bisphosphoglycerate mutase	PMGE_HUMAN	227248	49320.2	150791	203428	13662.9	157520	490520	225433	78916	405865	140130	128106	142771	303933	481973	346240	81913.7	80153.4	268487	214412	166060	159329	269440	246638	296299	523398	207373	396048	526576	233188	547032	263503	245964	308004	143671	236227	955267	253995	431273	156097	354913	433324	258273	157699	251858	340125
P07741	APRT	Adenine phosphoribosyltransferase	APT_HUMAN	NaN	4857.31	NaN	30124.4	NaN	21689	16133.6	NaN	NaN	7446.1	NaN	1.04697	NaN	NaN	NaN	1	NaN	NaN	NaN	8417.72	NaN	NaN	NaN	NaN	3110.36	NaN	1.14763	NaN	15947.5	1	NaN	NaN	12750.6	NaN	11502.2	1.0817	11797.8	49867	NaN	1	4770.15	NaN	7525.48	8056.26	48681.9	6352.18
P07814	EPRS1	Bifunctional glutamate/proline--tRNA ligase	SYEP_HUMAN	NaN	NaN	NaN	NaN	11677.7	NaN	NaN	NaN	NaN	NaN	NaN	NaN	NaN	NaN	NaN	83405.1	NaN	NaN	NaN	NaN	60405.9	NaN	NaN	NaN	NaN	NaN	NaN	NaN	NaN	NaN	NaN	NaN	NaN	NaN	NaN	NaN	NaN	29119.8	NaN	NaN	NaN	NaN	NaN	NaN	NaN	NaN
P07858	CTSB	Cathepsin B	CATB_HUMAN	337377	364477	190744	95810.7	8778.7	183565	136587	139762	130933	338042	143668	430354	126329	316629	149390	149885	991720	59486.4	280248	132388	664053	273350	227356	100681	138594	352351	330378	406053	200304	108569	156049	130183	124675	480733	171344	248034	253914	243970	369505	341749	258383	391645	181852	398542	197344	222782
P07864	LDHC	L-lactate dehydrogenase C chain	LDHC_HUMAN	2.57357e+06	12980.2	2.0484e+06	2873355	1.23112	1.735e+06	2.59447e+06	1.59932e+06	223520	995397	2245075	1.25414e+06	NaN	1.69947e+06	3.74169e+06	2.799e+06	10433574	NaN	643862	658479	3919.84	1.11141e+06	976828	886970	NaN	NaN	1.59155e+06	4615366	207806	5964.9	182495	422882	1.74224e+06	1.53477e+06	NaN	NaN	606087	264611	3.51837e+06	1.03776e+06	3.10195e+06	410869	2837033	774654	18008	540832
P07900	HSP90AA1	Heat shock protein HSP 90-alpha	HS90A_HUMAN	71236.6	50471.4	89412	90654.4	30059.4	104024	83095.7	37474.3	20756.9	68313.1	38331.9	61799.8	64414.5	109219	59465.1	30265.2	17588530	64488.6	77182.8	137306	1.05702e+06	70468.5	29437.3	53646.9	28571.8	148434	58125.6	NaN	63977.2	42559.7	162897	30339.2	117235	65365.5	66076.5	64021.2	49436.2	145783	67158.1	39075.9	57355.7	59605.3	35333.9	80349.2	78756.5	32415.9
P07911	UMOD	Uromodulin	UROM_HUMAN	246643	100427	101934	191244	159657	250909	62852.2	17773.1	49412.8	196887	259972	137687	147679	235441	230448	183318	316166	217972	138230	142491	283217	150525	77729.1	137126	207625	217888	153063	163144	307201	245298	224426	221202	241435	97175.6	172046	386369	16990.6	204075	245395	190169	249137	255882	58798.4	76679.3	291934	87668.1
P07942	LAMB1	Laminin subunit beta-1	LAMB1_HUMAN	247378	209889	148874	135792	56115.3	195053	115543	124359	127440	250991	163230	247869	89902.5	231141	87300.1	123933	181908	112755	162214	161949	295768	141136	138076	145878	168463	290869	181263	131903	141928	114902	167853	185675	201940	206993	194424	96577.1	244689	93673.7	290559	163133	180339	241640	105792	187779	120483	174740
P07949	RET	Proto-oncogene tyrosine-protein kinase receptor Ret	RET_HUMAN	NaN	NaN	NaN	NaN	302220	NaN	54215.7	NaN	NaN	NaN	NaN	NaN	NaN	NaN	NaN	NaN	NaN	NaN	53523.4	NaN	NaN	NaN	NaN	NaN	NaN	25692.6	NaN	NaN	NaN	91724	NaN	NaN	1.08332	3533.47	NaN	NaN	NaN	NaN	NaN	NaN	2168	NaN	NaN	NaN	NaN	19127.3
P07951	TPM2	Tropomyosin beta chain	TPM2_HUMAN	NaN	1.81312	5113.74	1.30708	NaN	21034.1	NaN	9532.41	NaN	NaN	NaN	NaN	NaN	NaN	NaN	NaN	NaN	NaN	14282.8	NaN	NaN	3017.83	NaN	NaN	NaN	NaN	NaN	NaN	NaN	NaN	NaN	NaN	15262.2	NaN	49006.9	NaN	1.07838	NaN	35205.3	1	NaN	20431.3	NaN	16123	7144.66	1.31997
P07954	FH	Fumarate hydratase, mitochondrial	FUMH_HUMAN	NaN	NaN	1679.61	12278.3	NaN	73515.9	47710.9	12473	843848	7979.38	5905.59	27650.8	2531.65	280917	NaN	4009.77	NaN	NaN	4427.94	1	52574.3	NaN	57415.8	65271.5	7226.83	7358.41	NaN	66392.6	9480.22	1173.77	24415.4	NaN	NaN	58780.8	42011.9	NaN	30461.8	10585.8	1.35088	1	25760.5	163902	4197.38	NaN	3928.03	NaN
P07988	SFTPB	Pulmonary surfactant-associated protein B	PSPB_HUMAN	66543.4	48826.4	100054	72963.9	22631.7	54397.4	12752.8	20439.2	126940	41009.7	68115.5	111698	56157.1	103231	9846.14	13251.2	50425.2	101347	49480.9	85593.9	46187.8	51281.1	16416.9	38406.9	94819.4	76851.9	12223	31642.3	55126.5	39822.8	149531	82992	10114.2	115561	59215.5	27508.3	133030	19406.9	33956.6	103808	78486.2	46179.7	200413	23460.8	77207.7	16477
P07996	THBS1	Thrombospondin-1	TSP1_HUMAN	901556	3.66911e+06	653628	320562	279789	7.63835e+06	651280	771729	68102.7	361458	376012	518597	236277	943394	123497	58695.5	907613	171041	536027	68365.4	61002.5	593556	507102	179953	115578	1.06904e+06	179113	50195.9	163020	30364.8	376105	172882	588628	579715	1.27592e+06	186403	78840.3	924796	921858	110079	2.83086e+06	402425	482734	216121	940110	1.57415e+06
P07998	RNASE1	Ribonuclease pancreatic	RNAS1_HUMAN	421214	308579	435401	417868	176846	467134	375854	566779	370694	480195	421941	672922	394503	532207	341332	227376	950538	133437	554345	354415	412762	479645	575372	297209	251068	550313	444467	683711	483043	142216	544959	413552	209059	547664	348431	266606	706760	415914	422628	403622	194623	570025	460921	897811	587939	537769
P08118	MSMB	Beta-microseminoprotein	MSMB_HUMAN	24511.4	10355.6	1	14457.9	NaN	47672.4	1	47995.2	35799.9	NaN	NaN	32655.3	27538.7	NaN	NaN	1	NaN	NaN	NaN	NaN	17816.3	5081.84	NaN	NaN	31716.9	NaN	NaN	15846.1	NaN	NaN	22282.9	NaN	1935.89	1.23584	3324.21	NaN	NaN	NaN	7092.3	NaN	31843.5	2735.36	33345.8	13806.5	53936	55899
P08123	COL1A2	Collagen alpha-2(I) chain	CO1A2_HUMAN	9712.27	4686.74	11387.7	12936.4	162883	5192009	610543	3.37278e+06	NaN	10369.6	34629.1	4.63731e+06	10494.9	14260.3	2959.84	1	NaN	NaN	437501	2265.59	2403190	16105.1	10334	1	3488440	16131.6	531142	5457.37	978812	244898	28734.9	26909.6	1680.42	2.30522e+06	2.4812e+06	3167.98	20053.9	2872.62	13192.2	462686	7522.27	6.02706e+06	222119	233649	8863.72	20584.4
P08133	ANXA6	Annexin A6	ANXA6_HUMAN	1.39363	NaN	1.98371e+06	16366.2	NaN	431794	512266	130566	NaN	2516.82	572685	56102	46597.1	1.22805e+06	NaN	1.37665e+06	NaN	NaN	NaN	NaN	1.23316e+06	2.17702e+06	1.04106	NaN	18309.4	NaN	NaN	NaN	2.28683e+06	NaN	89067.5	NaN	1.27386e+06	NaN	1.2163	184358	1.06907e+06	23975.8	NaN	NaN	NaN	2419.39	9222.44	10560.9	645.64	NaN
P08174	CD55	Complement decay-accelerating factor	DAF_HUMAN	190346	216845	97506.8	181733	91476.2	260471	100501	129451	104054	112229	144520	366403	164936	145977	226656	104979	499833	142518	128177	111449	191561	153230	181254	103996	148020	151898	182691	251763	119498	109493	167434	109420	64212.9	177244	134164	82749.9	238495	104515	149546	106918	117391	180397	133302	274894	304787	187369
P08185	SERPINA6	Corticosteroid-binding globulin	CBG_HUMAN	26303974	25818412	20716116	28399434	29289630	23812354	17214326	19492790	19857884	26596840	20305822	22211320	14518951	27606654	20432464	23322722	30983970	25644060	23735744	22241966	21983076	25835498	25532212	27077730	24844654	27863786	33116688	20083998	25869888	23704894	21500680	24231826	24127478	32824218	38285392	27930916	19068098	21374134	27065142	29837792	24348828	32393498	21983502	18439844	23094132	23723520
P08195	SLC3A2	4F2 cell-surface antigen heavy chain	4F2_HUMAN	284810	597279	198728	283531	145073	259028	191850	296101	226756	173978	158359	385647	183078	267211	407125	266381	686038	139682	204968	188108	364080	281677	253220	221798	360441	307212	346938	380835	350731	259150	243600	275011	292983	430771	328000	249571	248943	219788	308056	279716	287215	499660	211177	262703	475845	256689
P08236	GUSB	Beta-glucuronidase	BGLR_HUMAN	13089.8	27189.4	15549	31624.9	25915.3	10099.5	21229.9	6392.69	30509.8	6318.4	11227.6	18653.6	9986.75	20103.8	14541.5	8074.32	3430.97	25358.8	6430.2	25934.9	25773.8	17508.9	13414.1	18067.6	19892.4	28131.4	13344.4	21410.5	NaN	16432.8	NaN	13788.1	10740.3	13238.6	25734.5	95909.8	17055.7	13621.4	19768.8	35043.3	11526	39542.3	NaN	5863.26	6702.89	32126.3
P08238	HSP90AB1	Heat shock protein HSP 90-beta	HS90B_HUMAN	152404	188289	151813	141940	130194	210892	174862	191017	109126	236940	159973	237198	180264	245843	134924	68754.5	203845	7128.03	193042	91879	792181	189031	160855	130391	215374	210102	162942	258706	148134	34501.5	119433	172856	359265	107701	154336	179095	212823	335955	215676	250167	172854	117495	158740	292600	234273	160779
P08246	ELANE	Neutrophil elastase	ELNE_HUMAN	NaN	NaN	NaN	NaN	NaN	NaN	7183.26	NaN	NaN	11242.6	NaN	NaN	NaN	NaN	NaN	NaN	NaN	NaN	NaN	NaN	NaN	NaN	NaN	NaN	NaN	NaN	3467.83	NaN	4252.05	2657.22	NaN	NaN	NaN	NaN	NaN	4312.29	NaN	NaN	NaN	NaN	NaN	NaN	NaN	27247.3	NaN	NaN
P08247	SYP	Synaptophysin	SYPH_HUMAN	NaN	NaN	NaN	NaN	NaN	NaN	NaN	NaN	NaN	NaN	NaN	NaN	NaN	NaN	NaN	NaN	NaN	NaN	NaN	NaN	NaN	NaN	NaN	NaN	NaN	NaN	NaN	NaN	NaN	NaN	NaN	NaN	NaN	NaN	NaN	NaN	NaN	NaN	NaN	NaN	NaN	NaN	NaN	NaN	NaN	NaN
P08253	MMP2	72 kDa type IV collagenase	MMP2_HUMAN	125700	123797	175604	94301.1	349794	97216.8	109943	149424	395285	164281	163962	117389	112042	108910	75028.9	131674	39147.8	188122	95718.2	121400	84986.4	152647	102909	94712.4	136888	168071	157426	119840	88821	213400	114986	75912.6	125312	69848.6	78872.2	107234	108641	110852	127109	153694	86770.9	80258.6	126166	201905	110814	79785.6
P08254	MMP3	Stromelysin-1	MMP3_HUMAN	262070	NaN	2156.68	NaN	5559.83	NaN	NaN	90578.3	99193.5	NaN	NaN	NaN	NaN	NaN	NaN	3353.12	NaN	NaN	NaN	NaN	NaN	NaN	NaN	NaN	NaN	NaN	NaN	NaN	10059	NaN	NaN	NaN	NaN	NaN	NaN	NaN	11512.3	NaN	1329.54	NaN	NaN	NaN	NaN	1447.61	12162	NaN
P08263;P09210	GSTA1;GSTA2	Glutathione S-transferase A1;Glutathione S-transferase A2	GSTA1_HUMAN;GSTA2_HUMAN	NaN	NaN	NaN	NaN	NaN	NaN	NaN	NaN	NaN	NaN	NaN	22137	NaN	NaN	NaN	NaN	NaN	NaN	NaN	NaN	23402	NaN	NaN	NaN	NaN	NaN	NaN	NaN	NaN	NaN	NaN	NaN	NaN	NaN	NaN	NaN	NaN	1	NaN	NaN	NaN	NaN	NaN	NaN	NaN	NaN
P08294	SOD3	Extracellular superoxide dismutase [Cu-Zn]	SODE_HUMAN	397434	372532	287136	295033	235675	780473	267182	289792	552454	389234	446015	441746	199233	464463	396731	298245	1.38737e+06	372044	410904	510486	313536	463968	486391	333358	364481	516128	385658	332626	190519	240906	332332	312138	271774	573610	401529	256201	354949	292463	487809	529008	249173	600057	284339	432347	422105	350178
P08311	CTSG	Cathepsin G	CATG_HUMAN	6863.77	16792.2	23239.2	2541.31	17835	5258.6	39077.1	8908.89	13699.3	34433.4	11991.5	11914.4	10221.5	8367.21	34220.6	3010.36	36822	27431	9345.94	7364.22	11690.9	25812.8	17969.6	6906.5	21536.1	2190.63	14809.5	4965.93	17182.2	20756.7	8228.18	14802.1	38399.9	21408.7	36939.8	37220.4	13864.8	18029.1	7879.27	18251.2	20580.4	12505	4688.46	99515	5104.18	10555.7
P08319	ADH4	All-trans-retinol dehydrogenase [NAD(+)] ADH4	ADH4_HUMAN	28901.4	135781	5905.07	81565	36025.7	61577.6	20970.4	17385.5	27424	66748.9	43469.9	100261	NaN	104914	150199	1	NaN	194560	24163.6	32893.6	113007	66398	NaN	22822.6	22990.6	NaN	NaN	110262	NaN	10195.7	NaN	38714	72245.4	NaN	140422	NaN	NaN	NaN	NaN	4464.83	5246.85	11655.2	NaN	7555.59	NaN	11616.7
P08397	HMBS	Porphobilinogen deaminase	HEM3_HUMAN	11804.9	17322.9	7311.45	6053.5	NaN	9867.18	32827.2	4779.98	NaN	46592.5	12918.7	1526.79	NaN	NaN	NaN	6314.47	NaN	NaN	12739.6	4935.15	6817.84	12038.7	8468.22	13365.8	18220.5	NaN	8304.94	NaN	57169.2	18611	42368.7	14120.7	12144.7	16777.7	NaN	7132.81	81854.8	9593.2	5106.07	4833.98	8586.37	6688.03	28159.6	1.03556	4254.68	20812.7
P08473	MME	Neprilysin	NEP_HUMAN	1.39363	NaN	NaN	NaN	NaN	NaN	NaN	772.953	18298.9	NaN	37685.7	19125.1	NaN	1.48831	NaN	NaN	NaN	NaN	60009.5	NaN	21612.9	1542.37	NaN	NaN	NaN	NaN	NaN	1.6486	25646	NaN	18302.6	NaN	NaN	NaN	NaN	NaN	1.07838	NaN	8577.52	12830.9	NaN	1.61184	NaN	1791.22	NaN	11494.7
P08493	MGP	Matrix Gla protein	MGP_HUMAN	326666	218491	181961	127349	101643	338059	238686	239690	350601	270085	194806	394043	478452	390973	501276	197800	327452	273382	223063	223847	106244	284784	191941	311721	268043	390809	295835	389360	519240	427220	393137	319179	374220	189479	581259	114995	224419	245181	245795	258648	150179	223888	401202	757786	593049	484455
P08514	ITGA2B	Integrin alpha-IIb	ITA2B_HUMAN	47658.3	77469.6	35714.4	77276.9	47074.4	146091	58027.5	75849.1	30371.5	76567.6	10251.9	13659.5	45807.1	59888.4	16696	18352.8	33579.8	14454.5	34326.9	23077.5	7733.58	21950.7	10841.8	39704.3	32727.9	70045.5	15454.7	36317.9	12295.7	21594.6	13535.4	16722.5	71582.8	12242.8	62632.7	21589.8	14049.2	9499.19	58004.6	56445.4	93867.3	40234.2	52364.9	123194	197171	40175
P08519	LPA	Apolipoprotein(a)	APOA_HUMAN	3.73962e+06	3.14777e+06	2.42123e+06	943656	1.0558e+06	10121922	557349	327752	2.476e+06	2.62074e+06	9708931	367163	571185	4.03906e+06	2357919	2.63254e+06	478818	1.33391e+06	3274352	1.24886e+06	2.44771e+06	2.96917e+06	497730	801587	1082127	4598037	939292	2525014	4.97515e+06	969902	667402	818895	3.73381e+06	790629	461360	1.25773e+06	2.0923e+06	1.0852e+06	3.55694e+06	4.33055e+06	24141250	2.57292e+06	1.01916e+06	2.00634e+06	4457187	878079
P08567	PLEK	Pleckstrin	PLEK_HUMAN	4742.28	113069	16055.4	101625	188619	233140	1	99613.3	NaN	89871.9	NaN	12377.1	31468.6	54323	NaN	NaN	NaN	52661.8	82249.6	626.638	NaN	30590.1	NaN	1186.49	NaN	61637.5	30570.2	5039.96	NaN	NaN	NaN	NaN	81484	NaN	64212.3	NaN	NaN	NaN	231420	48728.8	212607	55368.2	1387.13	96935.1	193324	17941.5
P08571	CD14	Monocyte differentiation antigen CD14	CD14_HUMAN	6.8941e+06	5.63645e+06	3.92207e+06	3.02709e+06	3379108	3.38793e+06	3.53447e+06	3.93014e+06	4291230	5852530	3354480	6.40391e+06	4.25194e+06	6853425	2.99547e+06	5.91097e+06	2958224	6.87136e+06	4.56289e+06	3.7309e+06	4698147	4.55467e+06	4195482	4.14525e+06	3.68975e+06	7024037	5835195	2.43022e+06	3820883	2.83628e+06	4938097	4.07876e+06	7558036	4840484	5881679	5.96524e+06	4747942	3999660	7043756	6002664	4272966	4547211	5465392	7960407	3.27625e+06	5214793
P08572	COL4A2	Collagen alpha-2(IV) chain	CO4A2_HUMAN	506531	262267	389822	479532	490849	240817	324433	264501	136933	284316	439732	371659	440597	778783	304099	543165	NaN	529026	725941	361189	210716	176173	372282	365413	303526	NaN	341241	627476	306285	351466	320103	603140	338162	192415	214648	730336	321520	442528	518383	196518	166620	167033	273705	329136	481177	637503
P08575	PTPRC	Receptor-type tyrosine-protein phosphatase C	PTPRC_HUMAN	175589	96887.9	25117	170768	1.23112	94196.4	61885.4	28201.8	96236.2	63125.5	76703.8	71134.9	40851	105128	254552	13272	160221	499280	23770	33219	123512	46804.4	27138.7	22254.4	78411.2	175671	25971.3	100869	99345.9	1	40520	86917.2	65327	107505	35423.9	40936.8	93127.6	84458.1	173484	41247.2	31789.2	56671.8	20014.7	48321.2	48247.5	55596.3
P08581	MET	Hepatocyte growth factor receptor	MET_HUMAN	222699	247638	106622	154360	116054	199922	76082.4	137994	102624	368475	124080	282064	118816	178934	139392	87914.7	52051.4	63706.1	133266	132605	260472	135192	178755	123657	125269	212481	153877	131480	136594	85632.5	154532	97465.4	166910	228460	189862	92928.1	100598	100670	179352	92925.8	144199	188446	111351	123260	157253	80347.7
P08582	MELTF	Melanotransferrin	TRFM_HUMAN	6367.09	1.81311	1	NaN	NaN	1.24128	NaN	NaN	NaN	145097	1036.45	1.04698	NaN	56941.6	NaN	NaN	NaN	NaN	15655.5	1054.05	101918	NaN	1.04106	1	24540.5	1.49744	NaN	NaN	NaN	NaN	NaN	1.13404	1.08332	NaN	1.21631	1.0817	7721.6	NaN	101643	1063.62	1.14119	6349.49	1927.39	7029.63	NaN	1048.2
P08603	CFH	Complement factor H	CFAH_HUMAN	141058448	98563088	99027744	135756256	89620824	81769840	107229584	119202728	93504768	111294064	117116400	82891848	116193688	137330720	96292888	148558624	63302780	145714496	99131936	139784976	76512120	109365888	111000088	93301296	118369320	152466160	112963104	87143104	102013536	103526896	114221640	116399640	103101776	99677432	121868288	120672944	105837072	123574744	146600160	113533248	103710472	97691048	122237672	139360192	89939568	99927344
P08637	FCGR3A	Low affinity immunoglobulin gamma Fc region receptor III-A	FCG3A_HUMAN	833326	1.3298e+06	486953	465730	256128	544417	562465	664426	335950	767741	623339	688242	549138	986955	917810	541419	2731197	150628	617309	707991	708121	645945	633215	592588	738541	893466	469498	1.15406e+06	586437	730731	782762	422332	925938	526755	808808	617225	506529	873382	885702	502684	513220	1.09084e+06	536752	3821673	1.17011e+06	952680
P08648	ITGA5	Integrin alpha-5	ITA5_HUMAN	65475.1	20216.2	36541.1	70773.7	122394	76145.4	87888.2	55400.2	37628.8	71725.5	86121	111805	76538.8	74457.2	37063.2	77418.9	44615.5	257816	40117.8	36371	108492	108629	68330.4	81645.1	97557.9	75284.1	47291.9	80816.5	36059.1	105938	36006.6	46920.4	59635.9	54281.4	93329.4	54472	54497.4	60249	75427.3	82121	53379.5	68089.4	81012.3	114748	92538.3	65060.8
P08670	VIM	Vimentin	VIME_HUMAN	13923.7	3811.47	11140.4	954.757	12583	3753.8	15731.8	12674	2.70596	10691.2	17613.6	9455.73	29324.2	26955.8	7720.98	2714.37	98768.3	2730.57	19530.8	11127.8	21050.6	10204.4	4269.43	1469.17	5747.57	17705.9	24545.8	8472.71	2843.65	1	14513.7	3244.89	27626	7968.41	18380.9	10280.1	15280.6	32726.7	26349.8	16670.7	22777.4	8223.87	6729.59	29349.1	27578.6	12387.5
P08686	CYP21A2	Steroid 21-hydroxylase	CP21A_HUMAN	NaN	NaN	NaN	NaN	NaN	NaN	NaN	NaN	NaN	NaN	16786.1	12245.8	NaN	NaN	NaN	26410.8	3243.71	NaN	5670.07	NaN	NaN	12871.3	NaN	NaN	NaN	NaN	4511.74	NaN	NaN	NaN	NaN	NaN	NaN	NaN	38465.5	14704.5	NaN	NaN	NaN	5820.9	12797.2	NaN	NaN	NaN	NaN	NaN
P08697	SERPINF2	Alpha-2-antiplasmin	A2AP_HUMAN	46719960	49100048	28350828	37887800	25084014	31225234	29960344	26470314	20455392	29187626	30535802	24530152	30519708	51662256	38346636	29498466	33905068	25956180	29859984	31555512	23492156	28507372	37004408	32372054	37143388	49002584	39164408	39993668	45543548	29487464	32977462	32383348	36663128	35935104	38718120	40540596	29838368	29086286	40090208	27413904	30716144	46510124	26908548	29604006	33368912	35494976
P08709	F7	Coagulation factor VII	FA7_HUMAN	668268	650306	338224	524415	345066	471051	525207	443067	416286	399692	253147	396073	257968	665560	450518	366442	111405	413075	425625	378511	247500	474756	591203	405511	668316	731251	643973	367125	541077	507437	453113	347112	457160	359131	595000	410056	590631	249058	625457	457034	452240	525950	529577	489331	293171	460564
P08727	KRT19	Keratin, type I cytoskeletal 19	K1C19_HUMAN	NaN	NaN	NaN	NaN	NaN	NaN	NaN	9052173	32182.7	1	NaN	NaN	NaN	NaN	NaN	1	34758.4	NaN	NaN	68671.4	NaN	NaN	1.02053	NaN	NaN	NaN	4424.74	4768.69	NaN	NaN	31966.5	NaN	4587.13	3201.36	NaN	1	NaN	316804	NaN	NaN	1.14119	NaN	1	NaN	6081.83	1.31997
P08729	KRT7	Keratin, type II cytoskeletal 7	K2C7_HUMAN	10612508	6.15574e+06	4.23502e+06	3.92111e+06	2.50249e+06	3.59318e+06	4.21433e+06	2.12643e+06	910454	4.77943e+06	5.51183e+06	5109869	4.07048e+06	9027868	3.43485e+06	5.3206e+06	2.78571e+06	1802535	2.7892e+06	4.42409e+06	812660	4.06626e+06	4305910	3.51264e+06	3.61061e+06	16374044	4900283	3.45413e+06	6.96131e+06	2.1695e+06	4.06165e+06	3.32982e+06	4.982e+06	4.54658e+06	2.24385e+06	5.21866e+06	3.446e+06	1456444	11157555	1.77135e+06	3.05882e+06	4867503	3.96947e+06	3.61704e+06	2.38203e+06	3.85615e+06
P08758	ANXA5	Annexin A5	ANXA5_HUMAN	26.4746	35076.8	NaN	39062.4	NaN	9698.89	NaN	27016	NaN	4272.27	NaN	NaN	NaN	17912.4	NaN	NaN	NaN	NaN	792.447	NaN	NaN	NaN	NaN	NaN	2896.78	14614.1	2909.41	NaN	NaN	NaN	1.03778	1.13404	14979.7	NaN	18816.7	NaN	2282.05	17625.1	34897.8	5992.42	19805.5	13228.4	8431.93	6026.53	45475.9	15592.5
P08779	KRT16	Keratin, type I cytoskeletal 16	K1C16_HUMAN	3377.98	NaN	NaN	NaN	NaN	1.24128	NaN	26343480	297798	3555.26	24541.8	1.04697	1.05133	12812.8	2.07501	17804.1	292762	NaN	7191.69	879619	NaN	NaN	45594.9	1	1419.6	8906.64	33570.5	26620.6	1.27138	NaN	51603.8	NaN	173159	26533.2	1.21631	33860.7	1.07838	2.09496e+06	6424.05	7463.94	2290.91	1.61184	NaN	20963.1	NaN	12608.7
P08833	IGFBP1	Insulin-like growth factor-binding protein 1	IBP1_HUMAN	102880	40834.1	64664.1	NaN	103977	3159.95	29349.6	1.21511	50084.6	38749.8	11033.3	545294	17755.3	104144	109001	18695	297645	171870	84689.8	98747.1	497846	91037.4	229191	27194.3	NaN	111051	96810.9	52728.1	39617.6	53537.8	100286	107141	47372.5	37896.5	1.21629	29698	23634.7	270648	106136	196850	105699	93860.1	274483	27123.7	30194.5	75371.9
P08861	CELA3B	Chymotrypsin-like elastase family member 3B	CEL3B_HUMAN	69220.3	15865.3	NaN	33313.9	1.23112	35506.1	22826	1.21511	NaN	42430.9	52491.1	18440.4	NaN	78425.8	43913	13144.8	NaN	NaN	15590.9	18856.8	11790.3	38084.9	NaN	1	82448.1	65874	74870.5	NaN	45277.1	1	45056.4	16846.1	48521.2	33238.2	58724.8	1733.37	31082	24463.4	64998.4	62281.2	4593.99	54995.1	53700.5	40870.6	19489.3	13495
P08887	IL6R	Interleukin-6 receptor subunit alpha	IL6RA_HUMAN	300278	180352	121504	72625.2	119424	98370	92599.9	88949.8	57278.2	78753	53934.5	99188.9	83279.6	109528	113353	77875.6	70119.5	158488	78951.2	67623.1	127909	167714	75737.6	108951	98909.4	102992	61158	292702	199943	123474	63809.9	40397.3	65808.5	159066	71528.1	47079.7	70379.9	26545.2	30247.1	74097.7	184606	22473.1	116488	58397.5	221854	132652
P09093	CELA3A	Chymotrypsin-like elastase family member 3A	CEL3A_HUMAN	NaN	NaN	NaN	NaN	NaN	NaN	NaN	NaN	NaN	NaN	NaN	NaN	NaN	NaN	NaN	NaN	NaN	NaN	NaN	NaN	NaN	NaN	NaN	NaN	NaN	NaN	NaN	NaN	NaN	NaN	NaN	NaN	NaN	NaN	NaN	NaN	NaN	NaN	NaN	NaN	NaN	NaN	NaN	NaN	NaN	NaN
P09104	ENO2	Gamma-enolase	ENOG_HUMAN	1.39363	NaN	1	1.30709	NaN	42355.2	1097	1.21511	NaN	187595	169898	NaN	2982366	1.48831	NaN	NaN	NaN	NaN	6474.64	1	116528	10546	NaN	13136.8	1.27012	NaN	8117.33	1.64862	NaN	NaN	5925.87	1.13404	14678.9	NaN	NaN	NaN	1.07838	86523.1	NaN	NaN	6398.73	1.61184	NaN	1.03556	1.65534	1.31997
P09105	HBQ1	Hemoglobin subunit theta-1	HBAT_HUMAN	NaN	NaN	NaN	27044.7	NaN	2467.64	NaN	NaN	NaN	NaN	NaN	NaN	NaN	NaN	NaN	NaN	NaN	NaN	NaN	20262.2	9196.79	NaN	NaN	NaN	NaN	NaN	NaN	NaN	4901.26	NaN	NaN	NaN	NaN	NaN	NaN	NaN	4828.06	NaN	NaN	NaN	NaN	NaN	3173.94	NaN	NaN	NaN
P09110	ACAA1	3-ketoacyl-CoA thiolase, peroxisomal	THIK_HUMAN	1.39363	2474.32	NaN	110269	NaN	NaN	18643.6	8407.99	NaN	NaN	1	54136	6083.65	11497	NaN	NaN	44544.4	NaN	1	NaN	38476.8	1	NaN	NaN	37446.3	5240.57	1.14763	6578.06	NaN	NaN	1.03778	1.13404	1.08332	NaN	NaN	NaN	3041.94	NaN	NaN	78520.3	1.14119	9292.95	656463	NaN	NaN	NaN
P09172	DBH	Dopamine beta-hydroxylase	DOPO_HUMAN	1505229	2.21702e+06	1.0044e+06	879333	2.63929e+06	1.83443e+06	1.85097e+06	2.38956e+06	1603051	539672	3.29757e+06	483026	947902	1573666	3.20496e+06	1.88915e+06	5050691	2.67184e+06	1.33593e+06	1.47038e+06	1.01856e+06	1.35167e+06	1.16429e+06	2.02138e+06	3.87721e+06	1.61882e+06	473400	940838	1.91652e+06	705152	351847	1.85259e+06	881104	2.25318e+06	962067	2.924e+06	1.08077e+06	789153	1.56541e+06	574833	1.77054e+06	2.01068e+06	1477966	1.1138e+06	163764	2.7949e+06
P09211	GSTP1	Glutathione S-transferase P	GSTP1_HUMAN	78198.4	109117	102605	89512.1	51993.6	249699	104726	144130	72007.3	74532.1	20310.6	33776.9	131505	81754	49641.2	29037	NaN	80483.1	76445.9	47530	519407	54762.1	103785	26631.7	52051.2	176550	91207.5	37639.1	82493.7	33000.4	88582.4	64295.5	130731	50208.8	155108	48942.7	171200	223940	125133	58817.4	150390	93806.4	95702.2	220676	199054	96929
P09228	CST2	Cystatin-SA	CYTT_HUMAN	NaN	NaN	NaN	NaN	NaN	NaN	NaN	NaN	NaN	NaN	NaN	NaN	NaN	NaN	NaN	NaN	NaN	NaN	NaN	4172.43	NaN	NaN	NaN	NaN	NaN	NaN	NaN	NaN	NaN	NaN	NaN	NaN	NaN	NaN	NaN	NaN	NaN	NaN	NaN	NaN	NaN	NaN	NaN	NaN	NaN	NaN
P09238	MMP10	Stromelysin-2	MMP10_HUMAN	NaN	NaN	NaN	NaN	NaN	NaN	NaN	NaN	NaN	1754.42	NaN	NaN	NaN	NaN	NaN	NaN	NaN	NaN	1	NaN	NaN	NaN	NaN	NaN	NaN	NaN	NaN	NaN	NaN	NaN	NaN	NaN	NaN	NaN	NaN	NaN	NaN	NaN	NaN	NaN	NaN	NaN	NaN	NaN	NaN	NaN
P09326	CD48	CD48 antigen	CD48_HUMAN	47374.2	81179.2	15085.3	21737.4	11113.2	38166.5	11679.1	24897.2	41503.5	43306.4	13362.6	47028.2	18228.5	51758.1	50356.4	6706.91	84324.2	101723	29130.8	25654.3	33213.4	24022.9	20471.3	3138.34	24913.9	73273	31149.9	117185	34158.8	17721.4	34804.5	36642.2	50519.2	58656	NaN	1.0817	15224.4	17716.4	71399	44840.5	34346.1	55551.2	5867.77	72065.2	46919.4	45145
P09382	LGALS1	Galectin-1	LEG1_HUMAN	31179.4	1808.04	68731.8	29716.8	23963.5	116042	61587.1	102155	124924	61094.8	84942.2	94414.1	74822.4	59171.4	74976.7	53834.2	93818.4	45594.4	89870.8	33098.1	52572.6	97829.9	98821.5	61258.5	62383.4	90920.7	58484.2	84638.1	38332.3	28683.8	82656	73671.9	110446	105844	98996.9	79412.9	133950	62816.8	69934.6	95447.2	92095.1	86064.1	102577	107755	100908	125629
P09417	QDPR	Dihydropteridine reductase	DHPR_HUMAN	15660.7	27005.2	NaN	NaN	NaN	1.24128	25666.1	NaN	NaN	12809.2	7186.1	17607.3	NaN	31609.3	19220.7	NaN	NaN	NaN	7094.15	17711.3	25522.2	18197.6	18170	NaN	NaN	NaN	NaN	5461.75	1.27138	NaN	2400.43	8012.98	5794.27	NaN	1.2163	NaN	9876.13	228427	13001.1	1	8509.66	6246.53	NaN	NaN	9895.23	5180.08
P09455	RBP1	Retinol-binding protein 1	RET1_HUMAN	NaN	36756.6	NaN	NaN	NaN	NaN	NaN	37878.3	NaN	NaN	NaN	NaN	NaN	NaN	NaN	NaN	NaN	NaN	NaN	NaN	NaN	NaN	NaN	NaN	NaN	NaN	NaN	NaN	NaN	NaN	NaN	1.13404	NaN	70191.5	NaN	NaN	NaN	NaN	NaN	NaN	NaN	NaN	NaN	NaN	NaN	NaN
P09466	PAEP	Glycodelin	PAEP_HUMAN	NaN	NaN	NaN	NaN	71877.2	NaN	NaN	NaN	NaN	1714.51	NaN	NaN	NaN	NaN	NaN	NaN	NaN	33139.6	NaN	NaN	NaN	NaN	NaN	NaN	NaN	NaN	NaN	NaN	NaN	NaN	NaN	NaN	NaN	NaN	NaN	NaN	NaN	NaN	NaN	NaN	NaN	381995	NaN	26312.7	NaN	NaN
P09467	FBP1	Fructose-1,6-bisphosphatase 1	F16P1_HUMAN	101590	4061.55	31633.3	91265.6	1.23112	80851.8	98101.3	36856.5	2.70596	237931	17527.6	142469	281065	101446	24861	8334.88	223118	63270.3	60974.7	576893	184949	30937.4	NaN	53426.1	47511.7	62652.8	118974	964528	1.27138	44983.2	22644.6	11725.1	418249	90939.8	22000.2	NaN	105070	101432	75383.5	86287.2	15540.9	33666.1	13061.8	46474.9	711224	62493.5
P09486	SPARC	SPARC	SPRC_HUMAN	215797	727781	185954	259568	132372	1.54785e+06	178290	259625	72022	168548	135282	166966	120263	218601	91888	16623.1	194688	51765.1	162830	42709.6	58923.3	173617	176518	73703.6	90285.6	252652	154302	98794.8	63057.9	23611.8	122197	74727	237734	220246	447914	139762	52722.8	238397	205330	54051	756281	215760	129111	90588.2	287046	474841
P09493	TPM1	Tropomyosin alpha-1 chain	TPM1_HUMAN	1.39363	3357.95	9030.67	88899.7	1.23112	98596.1	NaN	24489.4	NaN	NaN	NaN	NaN	NaN	NaN	NaN	NaN	NaN	NaN	4650.02	NaN	NaN	12344.5	NaN	NaN	NaN	1.49744	NaN	1.6486	NaN	NaN	NaN	NaN	16227	NaN	54001.3	1.0817	15396	NaN	1.35088	5105.36	34090.1	3864.96	NaN	50000.6	71868.9	16668.2
P09525	ANXA4	Annexin A4	ANXA4_HUMAN	NaN	NaN	NaN	12566.5	NaN	740.097	NaN	1.21511	NaN	NaN	NaN	NaN	NaN	NaN	NaN	NaN	NaN	NaN	NaN	NaN	NaN	NaN	NaN	NaN	NaN	1.49742	1.14763	NaN	NaN	NaN	NaN	NaN	1.08332	1.23584	51325.9	NaN	64259.3	27697	NaN	NaN	64077.3	NaN	NaN	NaN	11776.9	NaN
P09603	CSF1	Macrophage colony-stimulating factor 1	CSF1_HUMAN	20833.2	49773.5	45396.2	66800.7	76172.9	41915	17613.9	21828.5	20136.6	50883.1	13921.5	37661.8	10232.8	32055	100414	40911.4	19809.3	34372	32520.6	32396.9	38505.4	32738.7	18587.6	21640.4	31318.3	27869.5	53378.8	32833.8	214847	53383.4	73669.9	17252.6	35542.9	19362.1	27943.9	43004.5	39105.8	14482	25154.7	27451.2	15599.5	31714.1	19763.9	65695.8	12745.8	16875.6
P09619	PDGFRB	Platelet-derived growth factor receptor beta	PGFRB_HUMAN	127582	204884	85776.8	104078	149844	226533	135932	173532	212975	38165.7	161520	154362	33656.1	137363	187330	87862.1	259466	37021.1	97932.4	98418	148360	109027	113621	102189	128725	128020	98824.4	258915	18428.5	100063	109699	123224	136763	187742	108876	90627	72300.3	30516.5	124523	146447	90014.7	141739	58452.7	69598.8	198394	118703
P09622	DLD	Dihydrolipoyl dehydrogenase, mitochondrial	DLDH_HUMAN	24281	22970.9	15039.5	7185.87	NaN	17359.2	74882.4	5797.54	NaN	17690	60530.8	20613.9	281814	65834.5	5765.73	11458.6	14524	1.03068	20757	61058.7	44028.1	8408.78	15278.5	55931.7	15900.6	109483	45817.8	20353.5	14197.1	3616.39	NaN	33252.7	59741.9	18903.7	18926.3	6526.29	10624.9	14384.9	80178.3	71857.8	13618	22858.4	31767	52394.5	20031.9	1.31997
P09668	CTSH	Pro-cathepsin H	CATH_HUMAN	37587.8	73881.3	38009.3	30146.3	60999.7	29313.4	38592.5	20916	36500.2	163762	31856.7	168851	95145.3	81602.2	129363	51975.8	75464.9	114858	40140.2	3341.33	115393	48340	45528.6	38083.2	16956.3	20577.8	234452	46822.7	27415.6	57021.6	77356.1	34894.2	95668.8	58527.3	7798.18	203493	33886.7	34294	92130.9	163279	10579.6	62511.7	26822.5	54812	16327.7	40721.3
P09871	C1S	Complement C1s subcomponent	C1S_HUMAN	43657344	34501260	24247084	25075912	22854296	22138580	28346330	29459852	17415296	31807372	28490410	33434320	28160750	45245648	33022364	34545328	20298474	29799316	27945410	30873052	29375034	29281324	31997682	29795206	31514766	49311332	41192580	31221246	30380960	29148916	34540308	32760952	34550624	30579148	37242832	30566912	30011420	33475228	42445844	34020160	27104368	32701122	29926126	41025260	25772164	29455142
P09884	POLA1	DNA polymerase alpha catalytic subunit	DPOLA_HUMAN	8322229	92018.3	857774	837861	1.23112	602467	550765	1.39184e+06	NaN	1030835	1.9121e+06	1.08512e+06	NaN	9282217	1.18825e+06	1715871	NaN	444927	1.25439e+06	1.21939e+06	1.56071e+06	1.04417e+06	1.45945e+06	935343	NaN	9203644	2.77935e+06	6.22297e+06	3211816	852034	2465392	1383607	5.25274e+06	2.38718e+06	2.33127e+06	2170809	1.63628e+06	NaN	8984901	497154	1.40696e+06	11213900	1.3063e+06	2.57875e+06	925778	1.0756e+06
P09914;Q13325	IFIT1;IFIT5	Interferon-induced protein with tetratricopeptide repeats 1;Interferon-induced protein with tetratricopeptide repeats 5	IFIT1_HUMAN;IFIT5_HUMAN	NaN	NaN	NaN	NaN	NaN	NaN	NaN	NaN	NaN	NaN	NaN	NaN	NaN	NaN	NaN	NaN	NaN	NaN	NaN	NaN	NaN	NaN	NaN	NaN	NaN	NaN	NaN	NaN	NaN	NaN	NaN	NaN	NaN	NaN	NaN	NaN	NaN	NaN	NaN	NaN	NaN	NaN	NaN	NaN	NaN	NaN
P09917	ALOX5	Polyunsaturated fatty acid 5-lipoxygenase	LOX5_HUMAN	NaN	NaN	NaN	NaN	NaN	NaN	NaN	NaN	NaN	NaN	NaN	NaN	NaN	NaN	NaN	NaN	NaN	NaN	NaN	NaN	NaN	NaN	NaN	NaN	NaN	NaN	NaN	NaN	NaN	NaN	NaN	NaN	NaN	NaN	NaN	NaN	NaN	NaN	NaN	NaN	NaN	NaN	NaN	NaN	NaN	NaN
P09923	ALPI	Intestinal-type alkaline phosphatase	PPBI_HUMAN	NaN	NaN	NaN	NaN	NaN	NaN	NaN	NaN	NaN	NaN	5430.72	13293.9	NaN	NaN	NaN	NaN	NaN	NaN	NaN	NaN	NaN	1180.73	3614.58	2179.95	NaN	NaN	NaN	NaN	NaN	NaN	NaN	NaN	NaN	8125.96	NaN	NaN	NaN	NaN	NaN	NaN	NaN	NaN	NaN	NaN	NaN	NaN
P09936	UCHL1	Ubiquitin carboxyl-terminal hydrolase isozyme L1	UCHL1_HUMAN	1.39363	NaN	NaN	NaN	NaN	NaN	NaN	NaN	NaN	NaN	NaN	NaN	77914.3	NaN	NaN	1	NaN	28930	NaN	NaN	112735	NaN	NaN	NaN	NaN	42443.5	NaN	NaN	NaN	NaN	NaN	NaN	NaN	NaN	NaN	NaN	NaN	NaN	NaN	42690.8	NaN	32694	NaN	79226.7	NaN	NaN
P09958	FURIN	Furin	FURIN_HUMAN	19814.4	NaN	12289.3	14756.9	5059.4	12150.5	21587	14842	NaN	21268.3	12201.8	6808.44	3289.85	21753.8	5614.44	10079.2	NaN	NaN	3588.59	7541.97	18864.7	8393.12	10729.3	11087.8	15218.8	20938.3	12928.7	3086.91	NaN	NaN	9113.26	14704.3	15271.8	8483.63	NaN	14924.9	11707.8	16939.5	18260.5	NaN	13765.6	8525.18	12463.1	4708.21	4637.43	19581
P09960	LTA4H	Leukotriene A-4 hydrolase	LKHA4_HUMAN	223791	249218	123427	132869	32180.3	133412	159899	164932	109753	192848	95947.7	251663	103413	211254	118859	134362	237826	83586.9	200679	144300	764391	159681	93860.8	123637	137976	211920	324133	149427	141495	66056	399024	127247	212983	218515	116718	129369	216018	110481	214202	211766	225846	325233	251834	199663	286239	298504
P09972	ALDOC	Fructose-bisphosphate aldolase C	ALDOC_HUMAN	389935	442822	177111	493088	161303	314003	411834	328638	208375	338814	256254	343819	340295	496247	1499016	131315	516524	133009	341463	172576	706065	237623	185579	232612	275301	792925	173473	329222	309218	163857	171129	321058	261662	244385	336587	181238	243009	202861	332663	240924	420845	391249	143618	275057	506586	222985
P0C0L4	C4A	Complement C4-A	CO4A_HUMAN	348972160	270220960	214751312	340428704	267900128	209969056	184214864	374565440	281666176	344705888	285430016	402863232	293759456	340494912	276463264	310622528	419047456	330021952	239579808	338156096	84553792	279702720	288586176	247425776	355319232	378910048	324514816	437911104	459013888	377168256	249626624	368416416	342393216	327844672	215666512	293574112	415855648	317747200	362001984	289670240	345782976	456399008	308513088	447180416	230925312	305914720
P0C0L5	C4B_2	Complement C4-B	CO4B_HUMAN	23880026	12329500	16403700	16780240	35459408	16926924	8077535	25881432	28704768	24056546	30934854	28128328	18497174	25552522	8.1364e+06	40325380	20330188	35725388	21019006	40766436	4005456	21432352	20246392	21838632	21113832	27312708	21079552	23578336	19624830	64568824	19903428	27004442	26234126	17233058	16532304	29605954	35117376	29193358	26722458	25736116	28718156	27795334	23285534	37108272	15103358	14662617
P0C626	OR5G3	Olfactory receptor 5G3	OR5G3_HUMAN	NaN	NaN	24751.6	NaN	22563.3	NaN	5359.83	NaN	NaN	NaN	NaN	NaN	NaN	21178.1	NaN	NaN	NaN	NaN	16132.4	NaN	NaN	NaN	16736.6	9432.88	NaN	NaN	NaN	NaN	NaN	NaN	NaN	24152.6	NaN	2645.35	NaN	NaN	NaN	1	NaN	NaN	NaN	NaN	7532.99	NaN	NaN	NaN
P0C6S8	LINGO3	Leucine-rich repeat and immunoglobulin-like domain-containing nogo receptor-interacting protein 3	LIGO3_HUMAN	NaN	NaN	NaN	NaN	NaN	NaN	NaN	221750	NaN	NaN	NaN	NaN	NaN	NaN	NaN	322037	NaN	NaN	192363	1	NaN	NaN	NaN	1	325381	NaN	NaN	NaN	513907	NaN	249967	365478	NaN	91451.9	485586	NaN	339858	NaN	NaN	NaN	83628.6	173129	NaN	178608	NaN	441033
P0C862	C1QTNF9	Complement C1q and tumor necrosis factor-related protein 9A	C1T9A_HUMAN	NaN	NaN	NaN	NaN	NaN	NaN	NaN	NaN	NaN	5723.68	NaN	1.04698	NaN	NaN	NaN	NaN	NaN	NaN	NaN	NaN	NaN	NaN	NaN	NaN	NaN	NaN	NaN	NaN	NaN	NaN	NaN	NaN	NaN	1.23584	NaN	NaN	NaN	NaN	NaN	NaN	1.14119	6242.71	NaN	NaN	NaN	NaN
P0CF74	IGLC6	Immunoglobulin lambda constant 6	IGLC6_HUMAN	428.43	NaN	NaN	NaN	2144.85	NaN	NaN	NaN	NaN	NaN	NaN	NaN	NaN	NaN	NaN	NaN	NaN	NaN	NaN	NaN	NaN	NaN	NaN	NaN	NaN	NaN	NaN	NaN	NaN	NaN	NaN	NaN	NaN	NaN	NaN	NaN	NaN	NaN	NaN	NaN	NaN	NaN	NaN	21399.5	NaN	NaN
P0CG38	POTEI	POTE ankyrin domain family member I	POTEI_HUMAN	NaN	NaN	NaN	NaN	NaN	NaN	NaN	NaN	NaN	NaN	1.42457e+06	NaN	NaN	NaN	NaN	NaN	NaN	NaN	NaN	1	NaN	26344.6	NaN	105409	NaN	NaN	NaN	NaN	NaN	NaN	NaN	NaN	NaN	NaN	NaN	150933	NaN	NaN	NaN	NaN	NaN	NaN	NaN	NaN	NaN	NaN
P0CG40	SP9	Transcription factor Sp9	SP9_HUMAN	153804	25201.9	NaN	NaN	NaN	NaN	30079.9	NaN	217372	56690.2	NaN	40169.6	25003.4	166979	75264.2	66856	37454.1	NaN	NaN	26564.2	NaN	78477.5	33766	NaN	49952.2	219780	NaN	NaN	NaN	NaN	NaN	26822.8	71549.7	NaN	75946	45750.3	14909.5	NaN	208147	NaN	42059.6	NaN	29258.7	NaN	10174.8	22320.8
P0CG47;P0CG48;P62979;P62987	UBB;UBC;RPS27A;UBA52	Polyubiquitin-B;Polyubiquitin-C;Ubiquitin-40S ribosomal protein S27a;Ubiquitin-60S ribosomal protein L40	UBB_HUMAN;UBC_HUMAN;RS27A_HUMAN;RL40_HUMAN	167957	104886	162711	282397	75150.8	396236	355175	362051	128053	310751	177502	183797	206594	270898	324893	168374	663267	198003	252736	212625	238309	268631	220546	104197	293583	320960	338603	420070	345871	189828	400968	212307	162496	164703	220253	245005	505248	727727	192751	157931	426761	228111	494614	257847	274338	226871
P0CH99;P0CI00	ZNF705D;ZNF705B	Zinc finger protein 705D;Putative zinc finger protein 705B	Z705D_HUMAN;Z705B_HUMAN	10597044	6016323	5589721	9343466	286542	4.15229e+06	3903673	11053302	4.31049e+06	12035377	6.30972e+06	10983637	4925712	12112348	8967118	7.14388e+06	6731195	42206	7.57124e+06	11222689	2.45285e+06	6705131	6518516	4561509	7666700	10157203	7.82168e+06	12211804	12525532	939522	6532147	10847559	10726652	9074434	7.51343e+06	7797718	9007843	5197264	10619754	6.48501e+06	9406312	10415073	7.6861e+06	14560529	6204189	8858887
P0CI25;P0CI26	TRIM49;TRIM49C	Tripartite motif-containing protein 49;Tripartite motif-containing protein 49C	TRI49_HUMAN;TR49C_HUMAN	NaN	42288.5	33169.1	NaN	NaN	19616.7	11455.6	1.21511	NaN	NaN	NaN	7539.78	NaN	NaN	NaN	79298.5	NaN	NaN	20865.2	33173.8	4140.19	NaN	32947.3	14998.8	NaN	NaN	20077	NaN	NaN	NaN	21366.4	NaN	NaN	26959.4	NaN	NaN	38083.1	NaN	NaN	NaN	1.14119	NaN	55116.7	NaN	NaN	19571.6
P0DJD8	PGA3	Pepsin A-3	PEPA3_HUMAN	80736.6	79743.2	89312.1	33476.1	37287.5	53699.9	39481	45007.4	24523.3	112041	50925.3	47672.9	30242	64670.6	53067.3	1	265268	62022.1	114649	38932.5	64914.5	69975.9	53042.4	77546.3	107421	96523.1	118819	60136.4	122413	61140.4	50638.8	46620	82488.6	66509.6	45361.3	22897.1	81967.1	130871	101812	40831.6	94917.4	150711	100495	26661.5	132711	176456
P0DJI8	SAA1	Serum amyloid A-1 protein	SAA1_HUMAN	4107767	242167	5.4507e+06	700563	262208	188619	2.51632e+06	340988	282828	19319058	374392	658887	724613	2.19128e+06	251023	18290554	226488	2000752	3678368	1.39652e+06	2096474	3337521	639197	823885	178223	4.40481e+06	303288	361127	1.02083e+06	328538	530869	828615	2.13996e+06	194564	216602	36302136	2.27657e+06	787501	3.92654e+06	248902	246474	2.08743e+06	2.00829e+06	23320258	178259	592886
P0DJI9	SAA2	Serum amyloid A-2 protein	SAA2_HUMAN	1.39451e+06	32724.7	4.38851e+06	106285	NaN	NaN	464009	24059.8	32708.8	4.32611e+06	203159	247656	139836	1.66333e+06	78756	3.59733e+06	97113.8	659748	2.1455e+06	313517	457935	2248502	186156	61223.8	101930	1.70143e+06	42647.9	NaN	60491.8	120503	177133	181274	315360	4575.61	NaN	40781920	776880	258359	1.64736e+06	2127.21	NaN	1.56802e+06	381240	30769592	190956	119720
P0DM35;P80294	MT1HL1;MT1H	Metallothionein 1H-like protein 1;Metallothionein-1H	M1BL1_HUMAN;MT1H_HUMAN	NaN	NaN	NaN	NaN	NaN	NaN	NaN	NaN	NaN	NaN	NaN	NaN	NaN	NaN	NaN	NaN	NaN	NaN	NaN	NaN	1.19808	NaN	NaN	NaN	NaN	NaN	NaN	NaN	NaN	NaN	NaN	NaN	NaN	NaN	NaN	NaN	NaN	NaN	NaN	NaN	NaN	NaN	NaN	NaN	NaN	NaN
P0DMM9;P0DMN0;P50225;P50226	SULT1A3;SULT1A4;SULT1A1;SULT1A2	Sulfotransferase 1A3;Sulfotransferase 1A4;Sulfotransferase 1A1;Sulfotransferase 1A2	ST1A3_HUMAN;ST1A4_HUMAN;ST1A1_HUMAN;ST1A2_HUMAN	NaN	2759.98	NaN	NaN	NaN	30866.5	NaN	2506.94	NaN	1	NaN	NaN	NaN	3415.9	2.07502	NaN	NaN	NaN	6896.92	NaN	NaN	NaN	NaN	NaN	NaN	NaN	NaN	NaN	NaN	NaN	NaN	NaN	23577.8	NaN	38242.7	NaN	1.07838	3136.05	NaN	NaN	17730.6	NaN	NaN	11553.8	7384.62	NaN
P0DMV1;P0DMV2;Q5DJT8	CT45A8;CT45A9;CT45A2	Cancer/testis antigen family 45 member A8;Cancer/testis antigen family 45 member A9;Cancer/testis antigen family 45 member A2	CT458_HUMAN;CT459_HUMAN;CT452_HUMAN	2018385	880844	271268	650547	295884	423506	382432	508426	433668	286052	706177	189811	305204	2.16424e+06	544206	477750	694910	255052	453219	226829	318867	436756	418310	333149	516194	2.91711e+06	620810	2.02859e+06	943210	373677	470208	404159	1.45581e+06	552928	603584	491325	240209	488545	2.5036e+06	399560	404480	3.48686e+06	364122	1.07726e+06	645838	518848
P0DMV8;P0DMV9	HSPA1A;HSPA1B	Heat shock 70 kDa protein 1A;Heat shock 70 kDa protein 1B	HS71A_HUMAN;HS71B_HUMAN	89479.9	121508	101069	230292	44725.4	250190	114778	228546	22373.6	189624	42416.6	90464.8	68144.7	111189	79628.9	69452.1	78393.4	23998.9	64779.3	62675.4	353512	105090	34507.7	43777.3	79695.9	142472	97296.7	82354.3	112223	24881	131978	77539.3	152987	25887.3	131303	59976	197613	632064	141051	68146.5	191549	113832	71249.2	237832	225987	97707.4
P0DN25	C1GALT1C1L	C1GALT1-specific chaperone 1-like protein	C1C1L_HUMAN	21528.2	NaN	9968.44	10808.3	NaN	NaN	963.142	NaN	NaN	NaN	6042.38	NaN	18956.9	33615.9	NaN	8666.73	NaN	NaN	6496.06	3357.74	3627.07	6396.55	10646.6	NaN	1.27011	NaN	10402.5	58812.4	21376	14446.9	13.2275	6200.11	1.08333	NaN	4441.78	NaN	1.07838	151537	17270	NaN	NaN	3840.08	NaN	7920.94	49798.8	6667.55
P0DOY2;P0DOY3	IGLC2;IGLC3	Immunoglobulin lambda constant 2;Immunoglobulin lambda constant 3	IGLC2_HUMAN;IGLC3_HUMAN	4096711	3011946	9900757	3671817	87192344	1.48214e+06	3.09024e+06	5052938	11519499	4415322	4064617	2.57969e+06	5.7106e+06	4573132	4.63676e+06	4501633	2.26846e+06	138311808	3.26394e+06	3.43085e+06	1.78278e+06	3.6753e+06	2398164	3.90938e+06	6.09962e+06	4.33078e+06	7669908	7627486	7.61392e+06	48393828	2.41242e+06	4.00667e+06	8409800	1.40374e+06	3029883	3.18548e+06	3.32061e+06	5.19352e+06	4.32921e+06	9544596	2988177	4.31603e+06	8421961	4.72699e+06	4010720	2388124
P0DP23;P0DP24;P0DP25	CALM1;CALM2;CALM3	Calmodulin-1;Calmodulin-2;Calmodulin-3	CALM1_HUMAN;CALM2_HUMAN;CALM3_HUMAN	92468.9	109968	147461	476029	204062	630156	183821	273372	1114.9	199489	53809.1	140280	89205.4	116445	85066.5	108719	58030.5	232983	162451	20829.5	246187	175734	76578.8	94001.1	170830	96401	114063	130819	133492	111502	152628	85252.6	208752	98695.5	304481	108747	182213	245764	111475	26458.5	336731	121709	112842	253356	307235	183546
P0DP57	SLURP2	Secreted Ly-6/uPAR domain-containing protein 2	SLUR2_HUMAN	NaN	NaN	40800.6	NaN	NaN	44304.6	9563.4	54530.9	78510.1	26157.6	20534.2	85904.3	24255.5	NaN	NaN	15084	44394.3	NaN	26554.7	NaN	NaN	29350.4	22062.5	18294.4	9455.84	NaN	26045.4	NaN	17002.8	NaN	6806.91	9465.49	8986.83	32237.9	13899.9	NaN	50578.1	236239	NaN	10684.4	34396.5	27309.3	76735.5	61202.9	NaN	24565.8
P0DPA2	VSIG8	V-set and immunoglobulin domain-containing protein 8	VSIG8_HUMAN	NaN	NaN	NaN	NaN	NaN	NaN	NaN	NaN	NaN	NaN	NaN	NaN	NaN	NaN	NaN	NaN	NaN	NaN	NaN	NaN	NaN	NaN	NaN	NaN	NaN	NaN	NaN	NaN	NaN	NaN	NaN	NaN	NaN	NaN	NaN	NaN	NaN	NaN	NaN	NaN	NaN	NaN	NaN	NaN	NaN	NaN
P0DPH7;P0DPH8	TUBA3C;TUBA3D	Tubulin alpha-3C chain;Tubulin alpha-3D chain	TBA3C_HUMAN;TBA3D_HUMAN	NaN	NaN	NaN	NaN	NaN	NaN	NaN	NaN	NaN	NaN	NaN	NaN	NaN	NaN	NaN	NaN	NaN	NaN	NaN	NaN	NaN	NaN	NaN	NaN	NaN	NaN	NaN	NaN	NaN	NaN	NaN	NaN	NaN	NaN	NaN	NaN	NaN	NaN	NaN	NaN	NaN	NaN	NaN	1.03557	NaN	NaN
P0DTE1	IGHV3-38-3	Probable non-functional immunoglobulin heavy variable 3-38-3	HV383_HUMAN	23154.6	168479	132009	121856	2.43486e+06	179830	NaN	NaN	NaN	NaN	31687.1	NaN	NaN	127257	NaN	134698	NaN	406780	76887.5	83892	24841.6	127741	133222	NaN	82898.1	69815.9	113813	NaN	NaN	242938	159711	NaN	74340.6	NaN	189244	90405.9	46563.1	105705	120628	115087	35146.6	85486.2	158393	69045.2	88851.5	NaN
P0DTE7;P0DTE8;P0DUB6	AMY1B;AMY1C;AMY1A	Alpha-amylase 1B;Alpha-amylase 1C;Alpha-amylase 1A	AMY1B_HUMAN;AMY1C_HUMAN;AMY1A_HUMAN	191372	56568.8	137646	48955.6	357461	232696	48935.3	62940.4	64307.8	68733.3	81383.2	70950.3	83294.4	142041	113413	21085.6	216798	130575	118065	147802	84609.2	129599	142459	37120.7	63775.7	181386	1.268e+06	164989	811508	147572	122083	197943	238466	174350	139117	81680.6	275079	97389.3	181237	184767	77940	216019	168749	126430	98571.4	36350.1
P10124	SRGN	Serglycin	SRGN_HUMAN	235449	848776	128786	138310	79254.3	1.04544e+06	155213	197852	78947.9	98123.7	44975.7	99113.9	45559.2	255848	NaN	NaN	229507	217291	149781	NaN	29616.5	140180	100030	32649.9	53108.3	237234	23404.5	NaN	72805.6	NaN	56453.9	15471.3	126622	209938	330658	49788.5	1.07838	168538	275504	50325.8	720808	146202	70456	99609.6	218597	176495
P10144	GZMB	Granzyme B	GRAB_HUMAN	NaN	NaN	1	NaN	NaN	NaN	9929.58	NaN	NaN	8666.19	1	NaN	NaN	NaN	NaN	6619.89	NaN	1.03068	6923.89	15710.4	NaN	1	NaN	NaN	1.27012	NaN	NaN	NaN	1.27138	15904.2	1.03778	NaN	137.928	9394.14	NaN	1.0817	1.07838	7739.78	5326.65	1	NaN	NaN	1	1.03557	NaN	5834.86
P10153	RNASE2	Non-secretory ribonuclease	RNAS2_HUMAN	266130	205196	172173	227394	96908.9	263565	169003	268998	182890	159151	123145	188596	232653	217133	243518	183733	306460	80662.8	132988	108039	148928	174000	195107	140379	185059	243202	247641	281861	133911	52237.7	216156	117320	100045	129947	171816	134182	173757	105802	205251	234154	129777	281420	225917	725075	168695	203751
P10253	GAA	Lysosomal alpha-glucosidase	LYAG_HUMAN	NaN	1.81312	NaN	NaN	NaN	NaN	15095.6	6651.78	7647.39	1	NaN	31796.2	NaN	NaN	10083.7	1	NaN	NaN	10335.4	NaN	6391.76	1	NaN	NaN	NaN	8791.36	NaN	NaN	1.27138	NaN	NaN	NaN	1.08332	NaN	1.21631	10682.7	2393.37	10963.9	NaN	NaN	NaN	7001.4	NaN	NaN	NaN	NaN
P10321	HLA-C	HLA class I histocompatibility antigen, C alpha chain	HLAC_HUMAN	443464	180260	169952	544593	36977.9	322709	139298	398985	243002	NaN	198913	150411	262237	463430	875211	249596	939436	9207.85	133368	277890	433491	254684	14070.2	245469	167096	333848	168160	NaN	143788	NaN	160016	287547	257093	229101	542157	294704	354100	149794	431227	472062	199931	506901	99240.1	380640	625982	251202
P10412	H1-4	Histone H1.4	H14_HUMAN	NaN	NaN	NaN	NaN	NaN	NaN	NaN	NaN	NaN	36194.4	NaN	NaN	NaN	NaN	NaN	NaN	NaN	NaN	NaN	NaN	NaN	NaN	NaN	NaN	NaN	NaN	NaN	NaN	NaN	1	NaN	NaN	NaN	1.23583	NaN	NaN	NaN	55126.7	NaN	NaN	NaN	NaN	NaN	NaN	NaN	NaN
P10451	SPP1	Osteopontin	OSTP_HUMAN	85445.6	54443.3	90474.6	41482.1	72270	79527.7	42443.3	68098.4	52012.6	149736	40947.5	140607	54388.5	117879	NaN	54055.2	274176	404469	108149	56604.7	234121	92914.5	88418.7	134691	92388.7	117579	290056	74628.7	136136	48635.3	64653.4	41624.5	117540	103426	76460.5	149269	187756	222592	61363.8	56776.5	30098.2	127525	121451	197124	41542.2	47116.9
P10586	PTPRF	Receptor-type tyrosine-protein phosphatase F	PTPRF_HUMAN	122364	123348	102171	81447.6	44923.2	117621	71821.7	155912	69420.4	228259	98984.8	137484	117293	119361	89103.1	134331	77590.8	46310.7	139342	92692.9	2.34063e+06	144943	126739	107523	98970.4	153952	203963	119260	141529	71043.8	75797.9	131418	149965	129778	189993	125756	186675	83153.2	121698	52420.3	98579.5	160315	121692	131642	130288	109250
P10599	TXN	Thioredoxin	THIO_HUMAN	494147	234266	316078	458268	172234	681530	652946	1.94918e+06	137978	617427	330295	382764	336910	626985	286170	317633	377416	165638	309189	307289	407557	328547	219099	163203	415507	580971	313754	614232	662435	322092	634784	334002	314865	252983	283970	434603	1.18714e+06	2783575	509044	196505	531203	423170	621171	515715	396374	335335
P10619	CTSA	Lysosomal protective protein	PPGB_HUMAN	1.39363	62811.6	1	1.30709	1.23112	4766.48	1	10262.6	NaN	2968.28	1	19243.5	1.05133	1.48831	NaN	6126.46	4.31492	NaN	1	NaN	1.19808	1	1.04106	1	3272.17	1.49744	11043.6	1.6486	NaN	NaN	20563.6	1.13404	1.08332	6926.21	12056.4	11771.1	1.07838	150007	1.35088	1	2222.29	17810.6	9218.53	10666	20954.2	10832.9
P10620	MGST1	Microsomal glutathione S-transferase 1	MGST1_HUMAN	1.39363	19394.6	10691.8	55780.5	1640.88	8763.11	11361.6	17074.6	9056.31	6873.54	NaN	NaN	1523.27	NaN	9335.92	9318.32	45382.3	5137.56	NaN	11019.9	5840.44	6029.61	3045.31	NaN	3464.25	NaN	23330.5	7522.2	10788.9	2807.87	3646.95	14562.2	1928.35	NaN	10780.8	11680.3	1429.53	1	NaN	3618.92	21468.9	55.0578	8998.35	16736.7	21524.7	15210.5
P10635	CYP2D6	Cytochrome P450 2D6	CP2D6_HUMAN	NaN	NaN	NaN	NaN	NaN	NaN	NaN	NaN	NaN	NaN	NaN	NaN	NaN	NaN	NaN	NaN	NaN	NaN	NaN	NaN	NaN	NaN	NaN	NaN	NaN	NaN	NaN	NaN	NaN	NaN	NaN	NaN	NaN	NaN	NaN	NaN	NaN	NaN	NaN	NaN	NaN	NaN	NaN	NaN	NaN	NaN
P10643	C7	Complement component C7	CO7_HUMAN	32828972	36196668	26062246	29923532	14395680	31019174	19662122	24806666	34322856	34287392	26609312	39109676	25272706	38253252	23027040	28524578	24734142	26903222	27829468	32041484	29670670	28335716	9174018	22775948	21778220	41675156	32858698	19515222	34495428	25861766	27906696	26128050	20585768	27614142	32363544	37122624	27568502	23748076	37519216	35251280	21247684	31163900	21986188	46117140	37566948	25564294
P10644	PRKAR1A	cAMP-dependent protein kinase type I-alpha regulatory subunit	KAP0_HUMAN	NaN	1.81311	NaN	NaN	NaN	11765.6	1	NaN	NaN	1	NaN	NaN	NaN	6896.25	NaN	NaN	NaN	NaN	NaN	1	NaN	1	NaN	1865.45	NaN	NaN	NaN	NaN	NaN	NaN	NaN	NaN	NaN	NaN	51503.8	NaN	NaN	NaN	NaN	1	45749	NaN	NaN	3580.01	13467.4	NaN
P10645	CHGA	Chromogranin-A	CMGA_HUMAN	92045.9	75804.1	113676	100962	15804.1	99491.4	17790.5	161025	26009.9	188451	38570.8	120017	127740	80526.8	57277	108841	306494	141550	122706	81648.3	51118.7	174349	118510	35659.8	23126.1	89611.3	189281	57245.4	75449.1	29061.2	119138	149934	65207.5	37601.8	117339	115017	115489	61363.5	83927.7	47125.4	96877.1	52584.6	123220	148924	195122	283848
P10646	TFPI	Tissue factor pathway inhibitor	TFPI1_HUMAN	99963.8	64858.7	67908.4	68840	118650	102284	86064.1	60476	247725	68642.9	39437.6	116610	76778.2	102031	91933.2	107679	44766.9	221346	73335.6	75606.9	48741.3	109150	66624.5	148111	124318	115880	100156	78161.9	85890.2	167350	87554.6	105089	152363	96180.9	95886	53875.5	67248.1	52553.4	89836.4	164714	106949	87020.2	148709	38375.5	93356.6	72248.1
P10720	PF4V1	Platelet factor 4 variant	PF4V_HUMAN	386859	3.61862e+06	620743	138115	325564	2.96835e+06	875904	299626	508510	77057.1	15935.6	301376	229063	174574	174690	186439	1.70552e+06	286510	154446	138016	NaN	113505	34822.8	352170	197152	339813	NaN	NaN	153386	NaN	57667.5	95840.5	217821	100338	526898	401.119	64339.9	582964	322836	NaN	1.17851e+06	86067.4	213309	141287	462364	356134
P10721	KIT	Mast/stem cell growth factor receptor Kit	KIT_HUMAN	237283	324296	190274	323289	216355	321516	177977	239879	104841	113823	230933	168186	238718	306075	208055	431581	397232	348678	242337	214570	2.50215e+06	251067	248557	267122	619599	350709	161406	231056	328955	184476	303620	147699	111548	220453	398929	260440	160637	108732	262366	238394	293261	417737	186021	99455.4	269977	464306
P10768	ESD	S-formylglutathione hydrolase	ESTD_HUMAN	31400.1	4775.89	241519	13276.2	NaN	49832.6	88526.4	8663.21	221473	20167.9	4845.7	25960.6	17320.2	50988.1	25738.2	30933.3	18147.9	29498.1	15339.5	10756.1	37030.7	20203.7	NaN	530434	15842.4	277258	13794	60490.5	47029.6	362509	34492.3	25592.6	4559.12	4839.59	9142.84	23439.9	58968.6	30973.5	197610	NaN	4473.49	16532	16595.5	15923.9	17788.6	6479.03
P10909	CLU	Clusterin	CLUS_HUMAN	155563680	149309744	109208600	145339536	106855184	116247784	99708544	139670096	89071264	111181648	122159648	111513232	122479264	171065600	139104768	113743232	60680532	143226176	97251744	102169424	68106912	116297760	124964840	94673160	134020176	168899040	128773248	83378936	139657168	101701728	107885872	100189200	122924720	110512408	150710496	99128224	104399792	98239856	153309456	103049536	112210320	121793848	112385296	140371744	104506024	94163056
P10912	GHR	Growth hormone receptor	GHR_HUMAN	12853.5	NaN	1	NaN	NaN	22454.4	29564.5	1.21511	12806.1	16089.3	NaN	NaN	NaN	16832.9	21707.6	32637.1	NaN	NaN	4428.05	20971	13341.8	4222	NaN	5724.15	15290.3	3623.22	NaN	23897.9	3217.75	NaN	NaN	25803.4	9078.29	7388.14	9918.45	NaN	24706.6	21660.9	13961.6	32784.5	NaN	13210.2	1674.91	8503.01	5389.44	50661.8
P11021	HSPA5	Endoplasmic reticulum chaperone BiP	BIP_HUMAN	1.24095e+06	756183	614462	741583	873834	1003075	657548	936827	532968	735964	757644	1.05234e+06	726342	1.27048e+06	873236	587363	805074	764550	772502	784301	937416	793359	785314	496189	676383	1.33721e+06	950775	828340	610248	740472	757425	709367	881148	939847	960700	622018	545120	975139	1.1365e+06	731688	843948	884172	670787	979504	850814	872700
P11047	LAMC1	Laminin subunit gamma-1	LAMC1_HUMAN	184007	76550.5	40590.7	50583.5	5577.96	106438	90330.4	42200	42916	128581	55552.4	118958	122296	211380	27042.3	29671.1	83076	38822.6	63840.3	45822.8	76798	44906.9	53799.1	44932.5	49663.8	192319	35826.3	62649.1	24606.9	10392.4	49244.9	55176.6	56127	77704.9	68572.1	39367.4	46008.1	29534.4	156952	35407.7	49529.1	69391	33956.6	43021.7	51276.5	56594
P11049	CD37	Leukocyte antigen CD37	CD37_HUMAN	NaN	NaN	NaN	NaN	NaN	NaN	NaN	NaN	NaN	NaN	NaN	NaN	5879.42	NaN	NaN	NaN	NaN	NaN	1	NaN	NaN	NaN	NaN	NaN	NaN	NaN	NaN	NaN	7601.66	NaN	NaN	NaN	NaN	NaN	NaN	6015.72	NaN	1	NaN	20230.1	NaN	NaN	NaN	76601.6	NaN	NaN
P11142	HSPA8	Heat shock cognate 71 kDa protein	HSP7C_HUMAN	101209	114700	85905.5	188777	74965	271920	112435	149014	35018.3	103486	34300.3	70727.2	52371.2	119684	23198.4	45588.9	13582.1	40941	97732	39203.3	405019	79819.6	25359.5	34093.8	75261.4	138966	80423.9	75556.4	91533.8	61325.8	84488.7	51974.9	133523	31316.7	139859	70813.5	169231	190189	117454	47704.9	156142	86076.9	79569.3	134552	224158	93793.8
P11150	LIPC	Hepatic triacylglycerol lipase	LIPC_HUMAN	131592	27420	53312.3	32609.1	65048.8	40072	40986.1	106925	90587.9	39787.6	56123.8	19908.3	78269	75674.3	54113.4	35177.3	NaN	63616.8	39163.2	48543.5	32775.6	92191.1	73870.4	76616.7	30890.8	167466	66137.4	61709.9	46037.5	116662	51643.9	85757.5	91311.4	27430.9	39119.7	28450.2	81800.1	59465	197559	95769.9	80163.3	26441.5	58844.4	43332.3	30677.4	67256.8
P11166	SLC2A1	Solute carrier family 2, facilitated glucose transporter member 1	GTR1_HUMAN	127165	12903.4	10724.1	6895.72	NaN	23973.6	19372.1	10805.2	8281.31	59257.7	NaN	3795.52	10084.9	15963.1	8452.11	51530.6	36614.3	NaN	56040	NaN	4448.88	1651.37	1537.32	14300.2	15850.6	30133.6	1376.51	11984.1	41342.5	44262.3	9602.77	14953.8	NaN	14931.8	NaN	12236.3	29315.9	9721.03	18062.7	NaN	12425.7	7779.31	14359.5	2206.84	28503.2	4312.9
P11169;Q8TDB8	SLC2A3;SLC2A14	Solute carrier family 2, facilitated glucose transporter member 3;Solute carrier family 2, facilitated glucose transporter member 14	GTR3_HUMAN;GTR14_HUMAN	NaN	NaN	NaN	NaN	1426.16	5326.09	NaN	NaN	NaN	NaN	NaN	NaN	NaN	NaN	NaN	NaN	NaN	NaN	NaN	NaN	NaN	NaN	NaN	1536.9	NaN	NaN	NaN	NaN	NaN	NaN	NaN	NaN	NaN	NaN	NaN	NaN	NaN	NaN	NaN	NaN	NaN	NaN	NaN	NaN	3962.04	968.878
P11171	EPB41	Protein 4.1	EPB41_HUMAN	NaN	NaN	45318.7	19750.5	1.23112	35441.4	71210.7	17172.6	NaN	NaN	NaN	NaN	3962.01	1.4883	NaN	1	NaN	NaN	NaN	9690.26	NaN	11928.2	NaN	5220.57	2902.6	3147.95	NaN	NaN	7163.82	1	NaN	1.13404	NaN	NaN	NaN	1.0817	11613.6	3118.57	1.35088	1	15864.8	1.61184	1	NaN	18975.5	18641.6
P11215	ITGAM	Integrin alpha-M	ITAM_HUMAN	39623	17993.2	12730.5	18457.1	32827.6	9604.27	57048	7399.75	30866.6	203803	17243.9	9879.97	6512.94	14286.5	NaN	14843.3	652727	24931.3	14741	24048.2	4625.65	12062.4	21823.1	41559.7	127969	18184.9	21465.8	11312.9	7781.08	18256.6	54423.7	15048.9	11411.1	84990.5	231237	11271.8	4048.12	7158.76	10084.7	34370	99650.3	8879.51	9658.46	24674.6	9389.19	19022.2
P11216	PYGB	Glycogen phosphorylase, brain form	PYGB_HUMAN	9875.62	NaN	2469.22	69892	1.23112	84709	NaN	40308.1	NaN	4473.32	NaN	NaN	NaN	NaN	NaN	NaN	NaN	NaN	NaN	NaN	14185.6	NaN	NaN	NaN	NaN	NaN	8442.22	1.64861	NaN	NaN	NaN	NaN	50352.8	NaN	37714.6	5424.33	NaN	20889.4	NaN	32825.9	34926	NaN	NaN	38936.1	43970.1	NaN
P11226	MBL2	Mannose-binding protein C	MBL2_HUMAN	5300095	7.96945e+06	3.05033e+06	3786683	1.14385e+06	478927	1.594e+06	2.00208e+06	423576	7626713	137905	4.95464e+06	2.30214e+06	6.24779e+06	3.5914e+06	11519240	2.1221e+06	1205230	4.14996e+06	7.51228e+06	9732759	3.82702e+06	4.70954e+06	2.93718e+06	2.96175e+06	6358655	3.13584e+06	3869873	1.69737e+06	855817	1.57153e+06	1726640	5266744	6.75337e+06	1.04043e+06	9142009	7.0494e+06	2.51848e+06	4749487	1.70286e+06	2.26683e+06	4.65046e+06	2.5607e+06	7.49742e+06	746707	4.62307e+06
P11233;P11234	RALA;RALB	Ras-related protein Ral-A;Ras-related protein Ral-B	RALA_HUMAN;RALB_HUMAN	3121.27	1415.89	1877.37	NaN	NaN	4820.28	2197.52	6162.13	NaN	5064.43	712.561	1842.59	1819.73	4292.34	NaN	1591.9	NaN	1.03068	3518.13	2868.87	3144.28	2967.46	NaN	1724.01	2137.1	4485.83	NaN	NaN	1764.72	NaN	1522.74	3652.65	2965.06	1373.24	2881.55	3302.79	NaN	14246.6	NaN	3395.24	3819.11	NaN	1534.28	19152.4	4987.79	2414.36
P11277	SPTB	Spectrin beta chain, erythrocytic	SPTB1_HUMAN	38289.7	1.81311	25128.7	227959	NaN	102558	16428	7864.42	4820.71	NaN	52152.7	69630	715.969	111536	29200.8	21812.8	9225.44	NaN	1	51196.4	20921	4379.77	NaN	10144.9	755.613	61481	374374	73608.3	22574.4	2892.18	54315.8	122902	64754.1	NaN	NaN	299.235	43030.6	140.82	12428.8	NaN	1068.86	427685	6995	4880.75	7413.35	101134
P11279	LAMP1	Lysosome-associated membrane glycoprotein 1	LAMP1_HUMAN	998840	977818	529332	1.04674e+06	591757	858050	482262	727432	536254	597502	616438	818055	781870	1.00311e+06	1248734	694543	1.7405e+06	609189	706477	597223	950983	615062	779381	911864	1.05784e+06	1.16476e+06	988382	1.29177e+06	768374	754957	635012	1.03463e+06	577247	924397	1.09529e+06	792274	670689	838082	1.05826e+06	643568	935622	1.16656e+06	517320	615805	1.01043e+06	910739
P11362	FGFR1	Fibroblast growth factor receptor 1	FGFR1_HUMAN	127733	105657	136247	120746	147596	133369	88247.8	96907.7	132554	139164	213199	137984	71159	147441	67965.8	168174	126517	318315	133473	113249	88746.6	162751	179770	129815	197122	144838	106083	103441	93356.4	148724	134826	119394	130073	165024	141985	94483.4	138099	122588	155345	121953	99117.8	153287	125776	146428	140050	116659
P11413	G6PD	Glucose-6-phosphate 1-dehydrogenase	G6PD_HUMAN	1.25103e+06	255672	331568	935906	4306.06	135251	555959	4969596	NaN	2.33398e+06	NaN	NaN	5418.86	2.00158e+06	NaN	1.14375e+06	68192.7	466112	1.21141e+06	3261.21	12806565	1404.01	NaN	NaN	372572	926308	1803.79	2122.1	653850	1	81700.7	19178120	1425205	1.23583	2.00641e+06	1.0817	5155591	1.05223e+06	255809	933.626	195526	NaN	1	715436	166901	NaN
P11474	ESRRA	Steroid hormone receptor ERR1	ERR1_HUMAN	NaN	NaN	NaN	125039	NaN	125856	NaN	NaN	NaN	NaN	NaN	NaN	NaN	NaN	985552	NaN	1.23956e+06	NaN	NaN	216448	NaN	NaN	NaN	NaN	257697	NaN	NaN	699173	NaN	NaN	172489	NaN	177636	NaN	9430.56	291337	NaN	NaN	NaN	NaN	257915	NaN	NaN	210142	335003	622373
P11532	DMD	Dystrophin	DMD_HUMAN	NaN	51321.4	61736.3	191581	NaN	NaN	1	367020	NaN	540316	359951	217630	NaN	NaN	252694	78017.3	NaN	NaN	66310.7	37965	58637.9	225837	NaN	111381	67721	196921	19855	97619.8	115084	NaN	92294.5	NaN	77280.1	141655	64664.3	129891	149255	132811	NaN	143083	60514.4	162718	NaN	131771	76566.4	111185
P11597	CETP	Cholesteryl ester transfer protein	CETP_HUMAN	373584	389591	416632	174941	262381	385389	357899	362202	463811	889494	439673	477361	431883	500996	520224	428625	540854	568614	514569	453786	219124	510235	546925	732631	1.04875e+06	441266	398399	426562	383582	443385	390534	412263	761511	478704	398943	705033	480784	503655	370793	680312	455219	277855	644665	353744	474895	501068
P11684	SCGB1A1	Uteroglobin	UTER_HUMAN	16623.5	14395.2	77585	68787	88127.3	123662	38492.5	224515	121377	101431	55091.5	89070.2	73290.4	47595.8	65214.6	91414.2	77690.1	94180.4	145169	106110	9778.11	107481	144521	44326.1	45529.4	65489.4	100498	325332	64432.5	53327.7	43818.8	148322	117200	103322	88992.4	25322	152620	78109.6	45937.1	86517.6	74233.2	190306	61167.9	291553	138088	65455
P11717	IGF2R	Cation-independent mannose-6-phosphate receptor	MPRI_HUMAN	224974	205220	151076	213524	126310	203121	213102	195248	260439	149237	183084	203647	124521	263864	135940	190785	141950	148273	162256	177882	199999	162991	143687	147933	186708	235193	140878	136374	158666	145706	157650	192735	195082	171495	216068	165318	156815	145552	283603	202134	209111	240080	115674	210776	208582	196501
P11766	ADH5	Alcohol dehydrogenase class-3	ADHX_HUMAN	98913.2	49656.5	1	25641.8	NaN	27329.8	30550.2	9723.57	NaN	427258	NaN	19717.5	NaN	NaN	12996.6	380276	NaN	NaN	193524	NaN	73795	17999.1	NaN	11066.8	34942.3	NaN	NaN	NaN	NaN	617323	NaN	6381.82	1.08332	NaN	144856	NaN	37141.6	NaN	1.19367e+06	13668	87241.6	34906.4	170594	1.03556	29784.8	2038.85
P11836	MS4A1	B-lymphocyte antigen CD20	CD20_HUMAN	NaN	NaN	NaN	NaN	NaN	NaN	NaN	NaN	NaN	NaN	NaN	NaN	NaN	NaN	NaN	NaN	NaN	NaN	NaN	NaN	NaN	NaN	NaN	NaN	NaN	NaN	NaN	NaN	NaN	NaN	NaN	NaN	NaN	NaN	NaN	NaN	NaN	NaN	NaN	NaN	NaN	NaN	NaN	NaN	NaN	NaN
P11940	PABPC1	Polyadenylate-binding protein 1	PABP1_HUMAN	NaN	NaN	NaN	NaN	1.23112	1.24127	NaN	590.015	NaN	1	32760.2	1.04698	NaN	NaN	2.075	NaN	NaN	1.03068	1	1	41738	1	NaN	1	NaN	NaN	34541.2	1.64861	NaN	NaN	1.03778	593.062	NaN	NaN	1.2163	NaN	NaN	35651.4	NaN	1	10667.7	5573.78	NaN	NaN	NaN	5177.06
P12035	KRT3	Keratin, type II cytoskeletal 3	K2C3_HUMAN	109837	151983	100314	709817	1.55763e+06	46238.2	27086314	566905	87303.1	51534.7	76289.6	120967	NaN	165642	398612	85170.2	1.53182e+06	788981	145201	219214	108686	NaN	224744	268226	NaN	82545.3	105340	1.44435e+06	NaN	468065	148637	76084.4	1.08332	149739	4864.69	100163	231066	3669150	21658082	219560	120241	NaN	NaN	466474	27156	1.10377e+06
P12036	NEFH	Neurofilament heavy polypeptide	NFH_HUMAN	39880.9	29149.2	NaN	48352.6	NaN	31167.4	35669.2	43923.7	18492.9	55584	NaN	36990.6	54186.5	36526.1	35299.9	NaN	NaN	13273.9	38528.2	NaN	23452.5	35778.9	32172.5	34608.3	36017.6	45992	40243.6	17141.5	38040.6	30034.2	36501.6	NaN	53391.6	37815.4	39564.1	57486.2	38538.2	26383.7	35359.1	18070.7	23782.3	13152	45159.2	29936.5	28024.6	29786.3
P12081	HARS1	Histidine--tRNA ligase, cytoplasmic	HARS1_HUMAN	NaN	NaN	NaN	NaN	NaN	924.016	NaN	1.21511	NaN	NaN	NaN	NaN	NaN	NaN	NaN	NaN	NaN	NaN	NaN	NaN	NaN	NaN	NaN	NaN	NaN	1.49743	NaN	NaN	NaN	NaN	NaN	NaN	NaN	NaN	NaN	NaN	NaN	34736.8	1.35088	NaN	NaN	NaN	NaN	NaN	NaN	NaN
P12104	FABP2	Fatty acid-binding protein, intestinal	FABPI_HUMAN	NaN	NaN	NaN	NaN	NaN	NaN	NaN	NaN	NaN	NaN	NaN	NaN	NaN	NaN	NaN	NaN	NaN	NaN	NaN	NaN	NaN	NaN	NaN	NaN	NaN	NaN	NaN	NaN	NaN	NaN	NaN	NaN	NaN	NaN	NaN	NaN	NaN	NaN	NaN	NaN	NaN	NaN	NaN	NaN	NaN	NaN
P12109	COL6A1	Collagen alpha-1(VI) chain	CO6A1_HUMAN	168116	230251	172527	84920.9	146062	166727	215741	245649	152023	182223	227551	197945	149667	179984	186174	179559	86599.4	111496	159299	144238	274287	181089	159641	153987	199425	179035	253043	98720.2	107084	172925	183102	123109	154691	168957	163752	132656	111727	133857	191723	245368	145680	119474	137693	188840	153671	208368
P12110	COL6A2	Collagen alpha-2(VI) chain	CO6A2_HUMAN	21408.7	1.81311	5023.52	10127	1.23112	16619.1	10242.8	1435.02	56097.8	9238.15	4448.19	20363.6	7216.89	9618.01	15017.3	14557.4	42007	2971.94	14791.4	21187.4	12220.6	9380.65	21983.6	1	32739.6	12439.5	24438.8	14218.1	4385.97	4721.42	11361.8	8770.64	12435.1	3658.02	21411.2	5661.45	12350.3	7912.54	2710.2	20355.5	3856.79	14761.8	4453.11	11929.2	18884.1	1452.25
P12111	COL6A3	Collagen alpha-3(VI) chain	CO6A3_HUMAN	95771.3	79520.1	81082	28387.9	150822	74146.8	56458.8	86116.3	105528	109039	148029	140636	103513	133491	91748.8	65692.6	179800	154748	75899.7	83139	133378	67219.3	101389	97445.4	159631	81069.5	105732	77753.3	46947.7	112839	78058.4	85322.4	59123.4	55430.6	59037	43872.1	95590.6	84871.1	102357	98605.5	90768.8	82100.8	146842	143308	78064.1	82649.5
P12259	F5	Coagulation factor V	FA5_HUMAN	1.40389e+06	2.68306e+06	1.57374e+06	3202602	1.79184e+06	2250567	1.79548e+06	1798416	3.63999e+06	1.71648e+06	1.19833e+06	1.6572e+06	1.3139e+06	1.29718e+06	2.08821e+06	1.8889e+06	1.91764e+06	2.40325e+06	1.38745e+06	2.36041e+06	1.44128e+06	1.93734e+06	1.82727e+06	1906184	2.06942e+06	1.72158e+06	2276953	1.50027e+06	2608979	2.02689e+06	1442401	1918129	1.55772e+06	1444635	1.7501e+06	2.11836e+06	1.62828e+06	1.71018e+06	1.67533e+06	1.93083e+06	2100968	1.43248e+06	1.83332e+06	1.79343e+06	1.83004e+06	1.50902e+06
P12268	IMPDH2	Inosine-5'-monophosphate dehydrogenase 2	IMDH2_HUMAN	NaN	NaN	NaN	NaN	NaN	NaN	NaN	NaN	NaN	2889.74	NaN	NaN	NaN	NaN	NaN	NaN	NaN	NaN	NaN	NaN	NaN	NaN	NaN	1	NaN	NaN	NaN	NaN	NaN	NaN	NaN	NaN	NaN	NaN	NaN	NaN	NaN	45209.1	NaN	NaN	1.14119	NaN	NaN	NaN	NaN	NaN
P12271	RLBP1	Retinaldehyde-binding protein 1	RLBP1_HUMAN	NaN	NaN	1	NaN	2918.94	NaN	1479.36	8441.66	NaN	NaN	NaN	NaN	NaN	NaN	NaN	7918.32	NaN	1.03068	NaN	NaN	8406.27	NaN	NaN	NaN	1482.5	NaN	1886.67	NaN	NaN	1	NaN	NaN	NaN	NaN	NaN	NaN	3909.82	NaN	NaN	11106.9	NaN	7661.26	1998.02	NaN	NaN	NaN
P12273	PIP	Prolactin-inducible protein	PIP_HUMAN	39689.7	50679.7	58206.2	24543	103967	51912.2	9700.64	78280.6	155146	41209.7	10274.9	89585.7	98204.2	41145.4	189164	43750.8	361830	1.03068	55616.2	NaN	NaN	55110.2	37003	36017.7	33438.7	43913.7	112686	82546.1	31316.3	152080	60832.2	58424.8	54948.4	43564.6	50948.1	23556.2	NaN	72302.8	32034.1	58754.5	50260.2	78122.5	42003.3	71700.6	75133.5	22228.1
P12277	CKB	Creatine kinase B-type	KCRB_HUMAN	NaN	NaN	NaN	NaN	NaN	27194.9	NaN	NaN	5687.25	NaN	NaN	NaN	NaN	NaN	NaN	NaN	NaN	NaN	NaN	NaN	1.19808	NaN	NaN	NaN	NaN	NaN	NaN	NaN	NaN	NaN	NaN	NaN	NaN	NaN	NaN	NaN	3322.92	4547.03	NaN	NaN	NaN	NaN	NaN	NaN	NaN	NaN
P12318	FCGR2A	Low affinity immunoglobulin gamma Fc region receptor II-a	FCG2A_HUMAN	331262	357439	211010	118296	121981	434359	329520	110491	1.66611e+06	383951	407613	395323	270881	184598	269016	289335	484459	498099	298978	78817.4	164705	278650	365398	231342	215090	397853	354275	528755	145967	290601	386762	231201	322419	305879	147358	NaN	177464	325375	309774	32165	255498	374655	276383	554550	458148	411900
P12429	ANXA3	Annexin A3	ANXA3_HUMAN	50462	16013.4	10364.7	13834.2	1.23112	31687.3	7399.52	15218.3	2.70599	6743.4	9601.32	27834.9	30079.5	49348.1	NaN	1	NaN	96321.1	4790.07	2486.44	6204.57	1855.44	1.04106	4148.45	6712.04	19005.5	5402.73	18782	1.27139	7646.34	6569.95	10288.4	24955.5	NaN	14943.8	3174.01	11727.7	5076.46	43204	9228.56	8422.34	1.61184	7251.59	33432.6	19265.3	5922.48
P12524	MYCL	Protein L-Myc	MYCL_HUMAN	162148	68346.7	152797	189042	152444	21259.3	113134	83227.8	205889	151197	166144	135192	237537	122332	125767	282683	NaN	257864	184886	183430	115910	201011	183380	184910	148041	142736	112318	115046	135995	179324	75520.8	96342.8	140499	160355	67917.5	194873	106974	300418	151265	112560	168025	169724	112399	238800	30132.8	131863
P12532	CKMT1B	Creatine kinase U-type, mitochondrial	KCRU_HUMAN	154306	NaN	1	1367.3	NaN	NaN	NaN	66748.9	NaN	61443.7	NaN	2346.61	3549.52	139819	1018.62	NaN	296133	NaN	829.366	451.333	546021	44393.8	3944.34	2770.04	NaN	NaN	NaN	5006.49	NaN	NaN	NaN	NaN	NaN	960.899	NaN	NaN	1447.9	103072	NaN	1	1729.85	NaN	NaN	NaN	595.759	1.31998
P12645	BMP3	Bone morphogenetic protein 3	BMP3_HUMAN	NaN	NaN	76614.5	NaN	NaN	NaN	94451	103980	NaN	NaN	38443	93503.1	NaN	105346	NaN	84127.1	NaN	79225.4	77985.3	NaN	45819	NaN	122682	122131	NaN	NaN	NaN	107549	NaN	NaN	NaN	118461	108354	NaN	82131.2	NaN	NaN	NaN	NaN	102873	132491	88249.9	NaN	NaN	NaN	124949
P12724	RNASE3	Eosinophil cationic protein	ECP_HUMAN	NaN	NaN	NaN	NaN	NaN	NaN	NaN	NaN	NaN	NaN	NaN	NaN	NaN	NaN	NaN	1	NaN	NaN	NaN	NaN	NaN	NaN	NaN	NaN	NaN	NaN	NaN	NaN	NaN	NaN	NaN	NaN	NaN	NaN	NaN	NaN	NaN	NaN	NaN	NaN	NaN	NaN	NaN	NaN	NaN	NaN
P12814	ACTN1	Alpha-actinin-1	ACTN1_HUMAN	75208.6	235367	98141.9	315755	99880.6	447510	29060.8	149980	20463	56257.5	11033.7	10750.5	23752.6	129211	61801.8	15616.3	37560.4	37454.8	81506.6	745.825	173001	69163.6	15159.7	66114.5	40548.2	77504.9	64233.2	215205	24117.6	4131.74	17125.2	206964	165547	26374.6	195208	23819.5	39983.3	146368	91890.8	104638	223749	91740.8	6645.79	191505	432962	137701
P12821	ACE	Angiotensin-converting enzyme	ACE_HUMAN	500318	699210	179352	485541	238393	248990	276715	222064	229581	305657	308447	412397	418209	467549	642679	177263	788709	112596	336727	188185	609576	290905	211090	677869	506873	540600	825309	400238	121898	169116	201348	320227	246868	513430	336441	164094	484950	335528	447269	209971	411945	562885	189527	440010	602212	249744
P12830	CDH1	Cadherin-1	CADH1_HUMAN	795615	383528	426962	242490	424991	642452	336551	527219	517677	561338	431528	683115	344481	670996	486816	391550	581744	320006	546850	354434	4.12506e+06	527316	318344	391984	346908	729374	753703	659530	420978	276602	412785	667766	797962	678319	334064	299997	695525	304584	660983	410601	354282	764704	382875	984210	512028	454398
P12838	DEFA4	Defensin alpha 4	DEF4_HUMAN	NaN	NaN	3914.29	NaN	NaN	NaN	NaN	NaN	NaN	2152.36	1721.51	NaN	6020.61	NaN	NaN	4439.76	NaN	NaN	5886.48	NaN	NaN	NaN	NaN	NaN	7980.53	NaN	NaN	NaN	11773.1	NaN	4838.39	NaN	2321.61	2060.69	6263.42	4023.04	1793.21	NaN	5605.06	7328.98	NaN	4048.78	1950.4	33188	NaN	NaN
P12883	MYH7	Myosin-7	MYH7_HUMAN	63774.4	NaN	42987	40246.5	NaN	31410	NaN	16959.9	NaN	48368.9	1327.28	15052.5	NaN	83064.1	NaN	28.5491	17684	NaN	31564.3	52388.4	NaN	39910.3	54507	51139.3	44510.4	63263.8	NaN	29013.7	NaN	NaN	NaN	15176.9	48016.6	NaN	43174.1	39476.6	1439.88	6442.77	26934.7	45522.2	2057.28	75853.3	53094.9	123.135	45917.5	302.127
P12931	SRC	Proto-oncogene tyrosine-protein kinase Src	SRC_HUMAN	NaN	NaN	4765.49	3170.12	NaN	1778.52	NaN	1.21511	NaN	2318.48	NaN	NaN	4948.89	NaN	NaN	NaN	NaN	NaN	NaN	1669.18	NaN	1	NaN	NaN	NaN	NaN	NaN	NaN	NaN	NaN	NaN	NaN	3219.2	NaN	NaN	1.08169	NaN	NaN	1.35086	5258.05	NaN	NaN	NaN	17424.6	6240.21	NaN
P12955	PEPD	Xaa-Pro dipeptidase	PEPD_HUMAN	1.37777e+06	1.67697e+06	674384	1.34648e+06	743265	1220460	733054	961878	715877	993296	1.08265e+06	1.17724e+06	1.01017e+06	1.30349e+06	1.53728e+06	671620	3.00365e+06	871252	939780	956861	1.85271e+06	809720	1.14606e+06	1.34449e+06	1.12093e+06	1.54908e+06	1.34864e+06	1.08664e+06	953542	569224	925651	597385	968664	1787833	1.33989e+06	865973	1.16667e+06	568061	1.41245e+06	954051	1.30324e+06	1.92819e+06	867866	750488	1.505e+06	1.46415e+06
P12956	XRCC6	X-ray repair cross-complementing protein 6	XRCC6_HUMAN	NaN	NaN	NaN	NaN	NaN	NaN	NaN	NaN	NaN	NaN	NaN	NaN	NaN	NaN	NaN	NaN	NaN	NaN	NaN	NaN	1.19808	NaN	NaN	NaN	NaN	NaN	NaN	NaN	NaN	NaN	NaN	NaN	NaN	NaN	NaN	NaN	NaN	36544.5	NaN	NaN	NaN	3117.01	NaN	1.03556	NaN	NaN
P13010	XRCC5	X-ray repair cross-complementing protein 5	XRCC5_HUMAN	1.39363	117454	456641	572400	NaN	NaN	622565	NaN	153300	590031	NaN	NaN	NaN	NaN	NaN	1.02024e+06	NaN	NaN	486271	NaN	281681	671573	NaN	596677	NaN	NaN	NaN	444976	690302	NaN	NaN	537018	728926	NaN	NaN	709306	NaN	NaN	NaN	1	146143	NaN	NaN	NaN	NaN	NaN
P13224	GP1BB	Platelet glycoprotein Ib beta chain	GP1BB_HUMAN	NaN	31042.8	16277.9	6139.45	NaN	52500.1	NaN	52855.4	NaN	74073.4	NaN	NaN	59721.6	NaN	NaN	10120.6	NaN	25638.6	32327.8	NaN	NaN	NaN	NaN	17019	NaN	NaN	NaN	1.6486	NaN	NaN	NaN	NaN	36505.7	NaN	NaN	NaN	NaN	NaN	21625.1	44439.8	46121.2	18182.3	NaN	114616	78231.2	NaN
P13284	IFI30	Gamma-interferon-inducible lysosomal thiol reductase	GILT_HUMAN	NaN	NaN	NaN	NaN	NaN	NaN	NaN	NaN	NaN	NaN	NaN	NaN	NaN	NaN	NaN	NaN	NaN	NaN	NaN	NaN	NaN	NaN	NaN	NaN	NaN	NaN	NaN	NaN	NaN	NaN	NaN	NaN	NaN	NaN	NaN	NaN	NaN	11947.6	NaN	NaN	NaN	NaN	NaN	NaN	NaN	NaN
P13473	LAMP2	Lysosome-associated membrane glycoprotein 2	LAMP2_HUMAN	1.22778e+06	1.16575e+06	886764	1.39705e+06	690754	855238	1.14024e+06	845393	1.46065e+06	786142	965614	1.01204e+06	757004	1.2642e+06	940232	1.12767e+06	1.44949e+06	1.30273e+06	1.01687e+06	837090	1.15948e+06	1.0891e+06	1.35185e+06	1.34873e+06	1.38066e+06	1371696	1.04917e+06	1.04791e+06	1350991	563239	1.03928e+06	1.01114e+06	1.133e+06	1.36261e+06	1.4179e+06	1.3376e+06	1.10406e+06	957437	1363834	1.55586e+06	1.22404e+06	1.53315e+06	755739	1.08692e+06	798634	1.21234e+06
P13489	RNH1	Ribonuclease inhibitor	RINI_HUMAN	68190.6	20048.7	33220.7	45306.1	113889	36494.8	128542	78207.8	38767.3	118926	64315.3	37118.5	77562.3	67962.6	18022.4	83907.7	20472.9	149953	55794.9	58449.8	402340	57520.6	14877.4	27784.5	84606.9	90153.2	53453.2	17102.4	69216.9	81692.9	125136	45105.3	93050.2	64233.2	19004.8	11824.5	202367	75726.3	88520.9	39315.2	69488.2	95770.6	61618.3	95220.8	58836.5	71145.6
P13497	BMP1	Bone morphogenetic protein 1	BMP1_HUMAN	10431.2	15309.6	6127.66	25403.5	13801.1	12455.5	15781.5	21333.2	34384.6	649.18	3518.24	5497.07	8663.17	9593.43	15950.8	12760.9	NaN	9254.65	2318.83	16336.6	12131.1	9707.09	8739.84	27955.6	16279.8	10388.1	45383.8	6832.86	5183.28	12383.4	5722.54	4705.55	2930.32	6387.66	14329.6	3749.42	8730.44	11106.6	11304.2	13853.1	6490.26	3349.65	3644.75	3496.23	5922.33	3170.98
P13521	SCG2	Secretogranin-2	SCG2_HUMAN	1.39363	NaN	NaN	NaN	NaN	1.24128	NaN	NaN	NaN	29993.4	NaN	NaN	NaN	NaN	NaN	NaN	NaN	NaN	NaN	NaN	NaN	NaN	NaN	NaN	NaN	NaN	NaN	NaN	NaN	NaN	NaN	NaN	NaN	NaN	NaN	NaN	NaN	NaN	1.35088	1	NaN	NaN	73585.5	NaN	1.65535	NaN
P13591	NCAM1	Neural cell adhesion molecule 1	NCAM1_HUMAN	1.13022e+06	818428	841373	918846	1.05385e+06	791098	619768	749429	971989	824887	824166	974923	577134	1.2836e+06	1.0836e+06	869917	1.51554e+06	665781	1.01808e+06	647310	2571270	1.02627e+06	875224	705576	1.07865e+06	1.279e+06	1.0268e+06	1.07877e+06	811730	640671	652631	769176	877336	934856	923492	1.06869e+06	766914	644718	1.21092e+06	1.01198e+06	950702	1.56134e+06	752112	940888	1.70868e+06	953698
P13598	ICAM2	Intercellular adhesion molecule 2	ICAM2_HUMAN	1.46324e+06	980180	1.04685e+06	919371	1.35581e+06	2.35603e+06	991892	1.42907e+06	910772	1.64422e+06	1.1918e+06	1.27507e+06	964258	1.50002e+06	1.41173e+06	1.4183e+06	1435440	1.32319e+06	1.2968e+06	967388	593276	1.41652e+06	1.43675e+06	1.10397e+06	1.21609e+06	1.51246e+06	1.61021e+06	1.77e+06	1.00996e+06	1.36105e+06	1.08912e+06	1.036e+06	1.64411e+06	1.77265e+06	1515741	1324119	820763	1.29671e+06	1422417	1.24566e+06	994691	1.27296e+06	1.13639e+06	1.71541e+06	1.12407e+06	1.00166e+06
P13611	VCAN	Versican core protein	CSPG2_HUMAN	42320.6	34592.6	117148	28630.1	278387	78943.5	95708.3	31980.5	8794.29	138460	45930	54209.8	40522.9	147383	54762.2	65201.5	206520	NaN	106675	94944.1	102760	55236.8	30698.9	46829.2	36051.1	75516.2	408476	83936.5	62549.2	148080	246282	68866.7	50587.9	62410.1	70055.6	49343.1	42535.6	84386.7	102507	140976	56833.7	123817	68993.5	135836	30042.1	62973.6
P13612	ITGA4	Integrin alpha-4	ITA4_HUMAN	NaN	NaN	NaN	NaN	NaN	NaN	NaN	NaN	NaN	NaN	NaN	NaN	NaN	NaN	NaN	NaN	NaN	NaN	NaN	NaN	NaN	NaN	NaN	NaN	NaN	NaN	NaN	NaN	NaN	NaN	NaN	NaN	NaN	NaN	NaN	NaN	NaN	NaN	NaN	NaN	NaN	NaN	NaN	NaN	NaN	NaN
P13639	EEF2	Elongation factor 2	EF2_HUMAN	2.57304e+06	1.81311	530694	2716206	589495	1.10568e+06	538416	854144	NaN	825512	1.81838e+06	1.06851e+06	1.77724e+06	2.71416e+06	2.07499	679481	6255.84	NaN	656916	968404	409936	1829477	754629	799108	NaN	1.47225e+06	789978	NaN	2.48829e+06	NaN	1.68638e+06	1.77774e+06	582563	1.95987e+06	2.73469e+06	767240	570458	661105	2.04071e+06	514270	542595	1.30444e+06	749505	887851	1877798	1.57804e+06
P13640	MT1G	Metallothionein-1G	MT1G_HUMAN	NaN	NaN	NaN	NaN	NaN	NaN	NaN	NaN	NaN	NaN	NaN	NaN	NaN	NaN	NaN	NaN	NaN	NaN	NaN	NaN	NaN	NaN	NaN	NaN	NaN	NaN	NaN	NaN	NaN	NaN	NaN	NaN	NaN	NaN	NaN	NaN	NaN	NaN	NaN	NaN	NaN	NaN	NaN	NaN	NaN	NaN
P13645	KRT10	Keratin, type I cytoskeletal 10	K1C10_HUMAN	1.04788e+06	496984	1.76299e+06	759970	2.19203e+06	608189	261802	9500564	138574	1.75496e+06	891461	516656	98271.1	1.72613e+06	1.17493e+06	461019	12364753	513387	1.38052e+06	2537939	238690	39092.4	2331732	862006	7525.41	1.48256e+06	1.50607e+06	1.78722e+06	18550.3	129045	1.479e+06	190962	147005	1.62318e+06	5095.13	520594	528610	85914136	1.33673e+06	277837	419790	24178.1	26515.6	2177022	692668	815205
P13646	KRT13	Keratin, type I cytoskeletal 13	K1C13_HUMAN	NaN	NaN	NaN	NaN	21405.7	NaN	NaN	NaN	NaN	NaN	NaN	NaN	NaN	51218.7	NaN	NaN	NaN	NaN	NaN	NaN	NaN	NaN	NaN	NaN	NaN	NaN	NaN	1.47519e+06	NaN	NaN	NaN	NaN	NaN	NaN	1.21629	NaN	NaN	51947.2	29171.4	NaN	NaN	NaN	NaN	NaN	NaN	NaN
P13647	KRT5	Keratin, type II cytoskeletal 5	K2C5_HUMAN	137571	73120.3	341996	45380.7	301035	28519.4	23290.9	14835732	165737	219326	172745	45845.8	1.81514e+06	342428	43969.5	52677.7	925792	68495.2	121583	704907	12621.2	47778.3	698930	53991.1	1294140	268872	746481	245659	238417	1	476922	4803.92	152210	562159	1.2163	123715	61751	34984108	366610	31270.8	103066	NaN	64742.2	432351	35361.3	256939
P13667	PDIA4	Protein disulfide-isomerase A4	PDIA4_HUMAN	124949	15062	107223	11117.2	23927.2	20017	5924.77	39078.8	26659.6	8603.5	42636.8	26723.6	61769.9	72623.9	21795.9	2981.79	35405.7	4630.68	10760.9	31568.3	31865.8	5297.9	11248.6	294682	29194	48379.9	10433.1	40785.8	62879.1	13203.5	33163.4	204546	13750.9	40754.7	6725.83	54294.1	38869.3	32365.3	117522	15864.1	14714.9	34600.4	211246	10248.9	49106.4	26428.3
P13671	C6	Complement component C6	CO6_HUMAN	16803328	14142315	15716458	9729214	14691722	11042218	16494902	11742513	14626166	13043423	16171444	11364256	12774245	18913074	10633545	23027146	7.70979e+06	19279214	13016410	20061444	7735203	15508549	17398118	12983591	14960509	18708858	16782060	7.28517e+06	18348604	15770094	19206756	17611590	20005174	15973401	17925360	28575822	15142266	17348646	18403342	16128097	16838982	9507461	20757538	18039198	8789892	11199180
P13688	CEACAM1	Carcinoembryonic antigen-related cell adhesion molecule 1	CEAM1_HUMAN	61404.5	57439.6	17004.5	37636.6	108265	44419.5	52283.1	79401.6	87605.5	33211.2	147428	100434	283557	152609	47412.5	21921.3	9519.43	40203.7	49580.1	22168.8	294254	61973.1	36450.2	43606.4	113942	169414	56557	105056	65150.2	66482.4	67354.8	17867.2	106713	65324.9	8193.36	47345.4	6400.93	31780.3	166191	116353	43234.2	107856	1	60872.7	25323.9	16182.9
P13693	TPT1	Translationally-controlled tumor protein	TCTP_HUMAN	NaN	6299.22	6833.82	12179	NaN	17205.6	896.968	21248.1	NaN	3592.93	NaN	NaN	NaN	NaN	NaN	NaN	NaN	NaN	NaN	NaN	NaN	8264.06	NaN	NaN	6200.51	NaN	9991.76	NaN	NaN	NaN	NaN	NaN	NaN	NaN	22413.3	NaN	8359.34	38504.6	1.35088	6273.9	20931.6	NaN	2935.54	17219.8	22891.2	7606.17
P13716	ALAD	Delta-aminolevulinic acid dehydratase	HEM2_HUMAN	63195	23578.6	30901	79941.9	11163.2	73282.5	143499	64967.2	17942.5	67755.8	43817.4	45037	34156.4	73544.8	98027.8	36729.6	77606.8	280899	39088.4	51436.9	22617.5	46443.2	12030.7	39184.8	105554	101491	49546.1	137846	113238	71175.2	130280	56075.7	34201	104289	35983.1	63342.5	307955	45658.9	76951.9	14783.1	70131.6	60074	81500	28716.9	53462.6	73448
P13727	PRG2	Bone marrow proteoglycan	PRG2_HUMAN	477873	524780	274563	358717	300287	410694	339928	370502	297217	368318	221976	428738	606027	523224	326622	305710	964442	322164	410663	574029	301162	397670	603886	382896	408693	480597	473348	926407	383877	458276	493458	477732	217830	305910	529546	274371	381261	319873	526786	1.16261e+06	367415	588845	450521	656060	882485	499453
P13796	LCP1	Plastin-2	PLSL_HUMAN	1.23981e+06	1.20693e+06	928330	1074519	669792	996614	1116294	833989	1.42121e+06	1.25417e+06	892466	832193	758258	1.39514e+06	645339	976174	359486	908395	948125	872559	1.37909e+06	1.04164e+06	1.01313e+06	875483	849528	1324497	771020	547008	532869	656224	1.25391e+06	1.00643e+06	1.55891e+06	783367	1.14938e+06	980687	703691	862602	1280599	2217804	1.12187e+06	977447	929509	1.62579e+06	921632	1.09316e+06
P13797	PLS3	Plastin-3	PLST_HUMAN	20142	16471.6	15137.3	22456.4	31180.4	27849.9	25779.9	39568.3	25807.2	34997.2	28313.7	32260.7	11575.5	27078.9	3561.71	23125.8	16523.4	12934.5	24443.4	18961.9	99302	24660	21942.7	17898.6	33000.6	24280	64755.3	8178.02	16966.7	28784	31893.2	19553.1	25582.1	27272.8	39396.5	11677.5	7853.6	88280.8	46398.7	37877.7	25291.8	13534.2	16385.8	33378.2	18060.7	29786.6
P13798	APEH	Acylamino-acid-releasing enzyme	ACPH_HUMAN	67109.6	21463.4	17172.3	23367	28678.4	25582.4	42430.6	33789.5	NaN	36106.4	14354.1	16416.3	15248.3	65979.3	NaN	17054.3	NaN	1.03068	16184.4	11890.7	11050.3	2809.53	10138.3	NaN	18091.9	1.49744	11519.6	26233.6	39003.8	30500.1	39843.9	13178.6	NaN	9731.91	6581.89	12185.1	77906.4	44154.8	14359.3	1917.71	17092.9	17356.4	34371.6	8169.87	9443.3	10522.7
P13861	PRKAR2A	cAMP-dependent protein kinase type II-alpha regulatory subunit	KAP2_HUMAN	1.39363	1.81311	1	111.202	NaN	1.24128	NaN	1.21511	NaN	1	1	1.04697	1.05133	1.48829	1350.55	1	1344.85	1.03068	1	1	867.596	1	1.04106	1	1.27012	1.49742	650.879	1.6486	1.27139	1	1513.06	1.13403	1.08332	462.137	541.611	533.916	1.07838	5943.07	24.724	1	2005.19	1091.7	1	1.03556	2780.14	1.31998
P13929	ENO3	Beta-enolase	ENOB_HUMAN	20642.8	27719	1	60670.1	NaN	74317	59212	15403.8	2.70596	23988.2	3827.83	5871.07	17313.6	11971.6	2.075	25055.7	5646.22	NaN	46494.4	5278.05	168945	14877.6	NaN	1	16063.9	21082.8	23003.8	22398.1	72235.4	24704.8	7595.2	9186.34	31167.2	35202.2	32388.4	4248.33	17699.9	113327	71460.2	31098.9	50032.5	27065.8	1	39158	38409.2	12175
P13942	COL11A2	Collagen alpha-2(XI) chain	COBA2_HUMAN	NaN	NaN	NaN	15028.1	NaN	16807.3	NaN	NaN	NaN	NaN	NaN	7612.49	NaN	NaN	NaN	NaN	NaN	NaN	NaN	NaN	NaN	1	NaN	NaN	NaN	NaN	NaN	NaN	NaN	24237.4	NaN	15971.8	1.08332	NaN	NaN	11778.6	NaN	1	NaN	NaN	8521.09	NaN	NaN	NaN	NaN	1.31997
P13984	GTF2F2	General transcription factor IIF subunit 2	T2FB_HUMAN	NaN	146790	111400	127288	120705	151728	147828	163894	242043	171332	55872.8	NaN	96440.9	172661	81674.1	NaN	26873.9	167500	124021	118188	74474.2	123351	192572	226977	248799	201084	158322	200467	195385	225059	120150	198091	198122	163315	112297	160135	202773	143284	175157	198736	213541	175381	160770	1032.14	99963.2	231694
P13987	CD59	CD59 glycoprotein	CD59_HUMAN	209325	125386	180848	170635	86850.6	211585	133101	190295	184445	162039	113943	248809	173051	189544	171703	181594	444363	96003.3	164169	176841	181232	205144	172992	121861	140355	265993	178439	301083	216351	88975.7	126263	144220	117924	166866	100199	134515	283908	153878	170775	95291.9	124931	238598	163329	291051	187689	180256
P14151	SELL	L-selectin	LYAM1_HUMAN	3.94104e+06	5784824	3770000	6094280	5.85814e+06	3.81821e+06	3.92128e+06	4.67313e+06	4774190	3.89794e+06	3.49668e+06	5220040	2.99581e+06	5233041	6.83775e+06	5.30882e+06	7.42613e+06	8845264	3.25491e+06	3105063	3.48881e+06	4.3729e+06	5369075	3.77364e+06	6.69647e+06	5902382	5.6251e+06	10805022	3.77182e+06	6554278	5795829	5159209	5769286	5243347	6.65968e+06	6.60801e+06	3157013	4365460	5.10954e+06	4.88788e+06	6479357	6831019	3.91855e+06	7.94948e+06	6367612	8.00493e+06
P14174	MIF	Macrophage migration inhibitory factor	MIF_HUMAN	10841.3	23067.3	47612.1	80318.1	19218.8	129099	76490.2	19870.7	19404.5	108757	17369.3	22277.4	5000.29	NaN	18746.9	17737.2	NaN	NaN	46159.6	10434.8	432535	37423.8	1.04106	9462.53	52184.1	1.49744	73984.7	89573	109914	32394.4	102769	77097.4	89151.3	67660.3	86917.9	63573.8	179534	88676.9	1.35088	12058.4	137920	104956	87749	99881.4	71895.9	94536.8
P14207	FOLR2	Folate receptor beta	FOLR2_HUMAN	15624.8	46581.1	54050.6	21027.4	NaN	52863.1	56162	65296.4	2.70596	226920	54515.1	43643	7301.28	37558.8	46638.7	62593.4	166517	NaN	69401.1	49707.4	22374	49186.1	61524	53441.8	68571.1	62915.4	53241.9	18004.2	62230.7	9092.78	42747.8	40750.1	65322.5	36119.8	39532.4	67864	58714.4	29421.8	66741.4	48938.1	12140	86431.5	75603.7	43325.7	41029.2	58728.6
P14209	CD99	CD99 antigen	CD99_HUMAN	16974.8	11291.6	28779.3	14709.9	NaN	56117.8	17909.9	23016.9	16498.8	39749.4	36508.4	39262.3	19476.9	34243.7	14523.2	38221.3	4048.71	66372.9	18158.9	4196.01	5947.07	48495.9	32856.5	25594.3	51706.6	44585.9	11480.6	NaN	31782.1	11812.4	12591.4	18812.1	11488.8	13114.1	39890.5	9457.19	19799.1	7080.33	44091.1	28263.2	118044	152426	27631.2	67742.7	14914.3	32429.9
P14222	PRF1	Perforin-1	PERF_HUMAN	NaN	NaN	NaN	NaN	NaN	NaN	NaN	NaN	NaN	NaN	NaN	NaN	NaN	NaN	NaN	NaN	NaN	NaN	NaN	NaN	NaN	NaN	NaN	NaN	NaN	NaN	NaN	NaN	NaN	NaN	NaN	NaN	NaN	NaN	NaN	NaN	NaN	NaN	NaN	NaN	NaN	NaN	NaN	NaN	NaN	NaN
P14314	PRKCSH	Glucosidase 2 subunit beta	GLU2B_HUMAN	228450	87129.6	108066	129428	151423	201520	115394	129690	53106.4	143649	157234	209003	75798.8	222140	174596	119975	214610	129076	187283	79991.5	256220	246675	224073	123677	125244	199524	166240	201238	122361	117601	123827	102443	127934	195370	120452	141323	162832	123909	194998	183848	161104	219204	145704	289914	246274	159941
P14324	FDPS	Farnesyl pyrophosphate synthase	FPPS_HUMAN	NaN	37480.8	NaN	84036.4	NaN	65888.6	18187.6	NaN	NaN	NaN	NaN	NaN	NaN	25997.4	NaN	NaN	NaN	NaN	8019.34	NaN	77192.8	NaN	NaN	NaN	NaN	NaN	NaN	NaN	NaN	NaN	NaN	NaN	30649.9	290998	NaN	NaN	NaN	15226.4	NaN	102537	70421.4	NaN	NaN	16495.2	14470.1	NaN
P14384	CPM	Carboxypeptidase M	CBPM_HUMAN	36984.6	33279.2	25193.1	61564	20957.8	18888.3	46656.4	54989.2	31381.1	54532	74497.3	119547	138635	48796.2	49852.9	29112.3	53202.1	16630	40374.1	17607.1	149970	39777.5	56306.5	30147.7	50800.1	58827.7	94352.8	42466	33067.6	48103.3	41282.6	34925.9	24895.9	42007	45506.7	32918	63839.2	50223.9	69686.2	34023	41378.4	55323.8	27066.3	28724.5	57895.3	72177.9
P14415	ATP1B2	Sodium/potassium-transporting ATPase subunit beta-2	AT1B2_HUMAN	NaN	NaN	NaN	NaN	NaN	NaN	NaN	NaN	NaN	NaN	NaN	822.862	NaN	NaN	NaN	NaN	NaN	NaN	NaN	NaN	NaN	NaN	NaN	NaN	NaN	NaN	NaN	NaN	NaN	NaN	NaN	NaN	NaN	NaN	NaN	NaN	NaN	NaN	NaN	NaN	NaN	NaN	NaN	NaN	NaN	NaN
P14543	NID1	Nidogen-1	NID1_HUMAN	153459	263968	136129	133866	190295	288830	122117	156804	301512	197177	98648.4	187393	151744	138504	81055.7	116617	35638.5	87337.7	125664	113687	243495	119230	92145.9	68339.8	111381	157538	180243	99378.6	72398.4	131566	93076	132877	185781	101915	134841	105965	78339.5	103788	151073	98166.7	136150	130564	50710.6	140951	153315	102186
P14550	AKR1A1	Aldo-keto reductase family 1 member A1	AK1A1_HUMAN	NaN	NaN	NaN	NaN	NaN	469.602	5170.65	2301.15	2.706	1028.42	NaN	4168.31	NaN	NaN	NaN	1	NaN	NaN	NaN	NaN	10493.3	NaN	NaN	NaN	NaN	NaN	4984.67	1.6486	NaN	NaN	405.67	NaN	1.08332	NaN	1.2163	NaN	9083.48	1	1.35088	3708.13	3664.09	1.61184	1650.43	1.03557	2257.79	10500.1
P14598	NCF1	Neutrophil cytosol factor 1	NCF1_HUMAN	26787.5	NaN	24379.2	NaN	NaN	NaN	NaN	NaN	35125.9	NaN	NaN	1600.61	25603.2	NaN	18964.9	NaN	NaN	NaN	1403.49	7716.08	NaN	21347.7	NaN	NaN	NaN	NaN	NaN	NaN	3115.63	NaN	NaN	NaN	NaN	NaN	NaN	NaN	NaN	24893.2	NaN	5581.95	NaN	NaN	NaN	1354.85	NaN	22531.2
P14618	PKM	Pyruvate kinase PKM	KPYM_HUMAN	78141.2	207906	166609	132584	331074	334760	158738	263220	1.01701e+06	174117	67496.4	103698	134726	118944	115611	62473.9	72717.9	42483.5	149758	94775.4	73026.9	177512	85709.4	123915	144246	140028	99830.6	55745.6	59769.2	68302.9	33630.1	89693.7	234495	96397.2	278629	102813	68526.4	690122	115660	151713	267038	142252	66521.6	271858	240555	117977
P14625	HSP90B1	Endoplasmin	ENPL_HUMAN	329443	249762	261115	191620	223106	326544	276688	289978	416985	440805	305331	308042	266807	335385	222811	171097	163687	382783	312347	167808	309897	334050	322861	225969	371949	341350	341103	126134	237781	286461	199797	272999	491918	201239	229202	359249	333122	391773	318728	487428	325415	255925	286136	462429	264638	264626
P14735	IDE	Insulin-degrading enzyme	IDE_HUMAN	22068256	44956700	8.30336e+06	11341720	14551954	8.17636e+06	6.86888e+06	9689256	12035264	8080767	10170139	9729537	9101549	17343696	14747297	26874310	19169286	6645022	13952903	14733299	8776967	9689099	12759619	8910334	26892734	48697012	15009981	13839619	31243962	16270872	10703441	12967415	10963536	29333916	11270716	17062324	8292667	8648296	24034692	16263761	8291715	12421081	14123424	14558627	7025371	11134139
P14770	GP9	Platelet glycoprotein IX	GPIX_HUMAN	NaN	16842.5	2504.69	NaN	1980.78	44945.3	NaN	31318.9	NaN	62218.5	NaN	NaN	50731.6	NaN	NaN	NaN	NaN	1.03068	NaN	NaN	NaN	5627.27	NaN	14851.7	NaN	NaN	NaN	75228.7	NaN	NaN	NaN	NaN	NaN	NaN	NaN	NaN	NaN	NaN	NaN	1	NaN	1.61184	NaN	55793.7	124108	NaN
P14778	IL1R1	Interleukin-1 receptor type 1	IL1R1_HUMAN	105410	1292.89	632.22	1341.09	NaN	NaN	NaN	1348.13	NaN	61126	NaN	4593.47	NaN	2540	3957.48	6770	NaN	NaN	1628.78	NaN	4106.4	10061.7	2320.11	37397.2	NaN	NaN	NaN	2605.79	NaN	5750.54	NaN	3257	40110.8	23259.5	NaN	1.0817	NaN	NaN	NaN	10537.1	NaN	NaN	3198.48	10790.1	NaN	1.31997
P14780	MMP9	Matrix metalloproteinase-9	MMP9_HUMAN	165421	65953.6	147556	120208	43372.1	105167	166534	109635	196488	161710	70619	94767.1	66529.5	191502	52213.2	44675.5	17070.6	149998	142785	105324	185132	143025	75963.7	142393	118639	202716	96254	74219.9	553018	136781	132010	70778.8	18550.1	154413	69221.4	214022	198470	82838.8	238091	49444.4	233064	132596	257138	1.43776e+06	94337.3	90092
P14859	POU2F1	POU domain, class 2, transcription factor 1	PO2F1_HUMAN	NaN	38952.4	NaN	NaN	1.23112	NaN	NaN	NaN	2.706	NaN	NaN	NaN	NaN	NaN	NaN	1	NaN	1.03068	NaN	NaN	NaN	NaN	NaN	NaN	NaN	NaN	NaN	NaN	1.27138	1	NaN	NaN	NaN	NaN	NaN	NaN	NaN	123643	NaN	NaN	NaN	NaN	1	NaN	NaN	NaN
P14866	HNRNPL	Heterogeneous nuclear ribonucleoprotein L	HNRPL_HUMAN	NaN	NaN	NaN	NaN	123510	110318	322227	NaN	NaN	353439	NaN	1.04698	NaN	NaN	NaN	339514	NaN	NaN	114713	NaN	NaN	106934	NaN	182148	38910.7	NaN	3993.24	NaN	NaN	168920	155197	NaN	NaN	NaN	225822	177792	NaN	291230	NaN	NaN	349976	NaN	NaN	NaN	NaN	249020
P14923	JUP	Junction plakoglobin	PLAK_HUMAN	NaN	NaN	3720.01	NaN	NaN	NaN	1	1343867	6810.11	31798.5	9621.75	NaN	1910.08	64060.8	68282.1	NaN	27683.8	NaN	3984.55	52201.3	38175.7	345.091	70054.1	NaN	71476.9	43751.5	30910.3	3720.19	1.27138	1	15185.8	NaN	5629.28	57837.5	NaN	13631.7	11854.1	3.64947e+06	1656.94	3392.56	4917.67	NaN	NaN	26692.3	7124.86	6218.71
P14927	UQCRB	Cytochrome b-c1 complex subunit 7	QCR7_HUMAN	8701894	15346867	18117426	944724	29101484	8711654	20945590	7.52698e+06	22548126	5.01344e+06	17510888	8435850	15201645	11624441	20143616	11324598	98911232	16500411	8219692	7128339	19609182	3.91351e+06	9173179	43372252	12403906	14252586	7.45976e+06	28378418	12941584	12454140	12118370	12512228	5.48375e+06	5806486	11472941	10655620	5758781	9631696	15192227	5.43658e+06	11771197	5620404	11773981	4.78401e+06	20408056	5411928
P15085	CPA1	Carboxypeptidase A1	CBPA1_HUMAN	25231.4	7157.95	16356.5	17707	82345.1	43352	21684.9	7636.7	4924.84	12932.4	5286.17	45864.8	24680.4	57544	11089.1	4676.06	10245.4	9810.18	45731.5	13865.6	1866	60240	46714.2	3898.14	32330.6	15503.7	43120.5	5651.42	53273.7	5501.18	6013.68	27438.3	23006.8	10762.1	21728.4	15773.2	8844.54	28710.9	21499.9	70865.1	24482.3	17280.7	47003.4	80976.7	1974.43	50241.3
P15086	CPB1	Carboxypeptidase B	CBPB1_HUMAN	35784.7	NaN	1	47057.9	47074.1	13297.2	1	2480.67	2.706	3004.03	25569.4	23699.6	1.05133	14795.6	29744	11709.3	NaN	NaN	38178.3	80544	1.19808	3807.08	2274.27	5481.92	28622.1	44736.5	91009.8	7920.95	27888.4	1	10915.9	1.13403	471.133	4042.15	6046.87	4872.74	3718.01	17037.9	8613.96	12995	44430.8	30409.7	6179.8	20261.3	12591.9	52967.3
P15088	CPA3	Mast cell carboxypeptidase A	CBPA3_HUMAN	512339	657022	105597	282218	41202.9	91753.5	146794	165824	244002	139881	210253	147998	150918	617287	271804	309320	402574	167302	822062	281698	112362	209403	599112	313103	198387	917470	147678	375352	139848	36804.2	87567.8	135496	246731	177849	115696	623184	366506	64952.9	1.06019e+06	125566	41857.1	333581	99783.6	320404	116429	100524
P15090	FABP4	Fatty acid-binding protein, adipocyte	FABP4_HUMAN	277066	28557.1	82662.4	62311.8	1.23112	108080	162568	108717	75194.3	86304.7	174090	99347.3	60665.6	168775	85859.4	82294.6	143831	63668.7	103357	100766	86660.1	101249	160576	80451.9	23352.1	288593	81154	171944	122698	14434.6	143377	73158.5	128252	89434.5	106885	43278.2	337832	116895	238967	101014	54742.7	153721	169801	181988	71454	225262
P15104	GLUL	Glutamine synthetase	GLNA_HUMAN	NaN	NaN	NaN	NaN	NaN	NaN	NaN	NaN	NaN	NaN	NaN	NaN	NaN	NaN	NaN	NaN	NaN	NaN	NaN	NaN	NaN	NaN	NaN	NaN	NaN	NaN	NaN	NaN	NaN	NaN	NaN	1.13404	NaN	NaN	NaN	NaN	NaN	13031.3	NaN	NaN	NaN	NaN	NaN	NaN	NaN	NaN
P15121	AKR1B1	Aldo-keto reductase family 1 member B1	ALDR_HUMAN	NaN	NaN	6601.58	3287.77	NaN	22246.7	11641.8	7246.17	NaN	4524.97	2147.44	1.04698	5529.38	3252.06	NaN	6670.72	NaN	NaN	5945.66	1	3163.24	6653.57	2108.72	2636.58	7220.86	NaN	5301.43	2824.19	NaN	NaN	11356.6	NaN	15877.7	7298.04	17103.6	1.0817	25508.4	6162.36	NaN	8386.98	15534.8	NaN	6386.98	9987.53	21004.9	9893
P15144	ANPEP	Aminopeptidase N	AMPN_HUMAN	1.47433e+06	1.0386e+06	1049611	1.2777e+06	811604	1207818	923078	947838	1286824	1.38209e+06	1.40396e+06	1921419	823882	1.57444e+06	1.43897e+06	1.01938e+06	1.40023e+06	854151	1231742	1.02839e+06	2.20323e+06	1.15887e+06	1.48927e+06	1.29569e+06	1.70595e+06	1.77188e+06	1.26647e+06	1.49275e+06	1461647	1.09258e+06	851246	1.38048e+06	975499	1645697	1.56071e+06	1067082	1.00416e+06	711036	1.55994e+06	1.58374e+06	1.26482e+06	1.69356e+06	839612	1.20366e+06	1605733	871264
P15151	PVR	Poliovirus receptor	PVR_HUMAN	456621	320422	293147	306622	302666	369762	443816	275038	540312	303936	281149	383841	253029	524789	688136	290938	751999	225984	405127	273732	554067	357394	272477	303956	368410	473854	420104	501157	470221	309978	367404	292203	407751	437007	406719	368397	412084	347118	456140	441554	398958	584704	247430	325308	417695	422184
P15153	RAC2	Ras-related C3 botulinum toxin substrate 2	RAC2_HUMAN	NaN	NaN	NaN	NaN	NaN	7328.09	NaN	NaN	NaN	NaN	NaN	NaN	NaN	NaN	NaN	NaN	NaN	NaN	NaN	NaN	NaN	NaN	NaN	NaN	NaN	NaN	NaN	NaN	NaN	NaN	NaN	NaN	NaN	NaN	NaN	NaN	NaN	NaN	NaN	NaN	NaN	NaN	NaN	17434.5	NaN	NaN
P15169	CPN1	Carboxypeptidase N catalytic chain	CBPN_HUMAN	11187064	9091269	7.02417e+06	7530910	5.28814e+06	7.63685e+06	7694488	9586254	7.24734e+06	8943599	9330539	6378612	7522520	10060999	9414693	8100200	9817180	7.46701e+06	8448479	11014166	10405328	7.28164e+06	8822065	8321154	8903932	12340460	10535887	8008954	6.34286e+06	7.46783e+06	4985772	5.44906e+06	10803630	9236664	9457451	13817970	7.00218e+06	7406479	10400320	7416037	5559558	10364044	8.0532e+06	7.11365e+06	8769952	6.90681e+06
P15259	PGAM2	Phosphoglycerate mutase 2	PGAM2_HUMAN	NaN	NaN	NaN	NaN	NaN	NaN	NaN	NaN	NaN	NaN	NaN	NaN	NaN	NaN	NaN	NaN	NaN	NaN	NaN	NaN	NaN	NaN	NaN	NaN	NaN	NaN	NaN	NaN	NaN	NaN	NaN	NaN	NaN	NaN	NaN	NaN	NaN	NaN	NaN	NaN	NaN	NaN	NaN	NaN	NaN	NaN
P15289	ARSA	Arylsulfatase A	ARSA_HUMAN	247330	NaN	9451.49	58680.8	NaN	65395.5	28048.5	63571.2	21315.4	75851.4	53715.1	51677.2	1.05134	369239	95105.1	87125.9	NaN	NaN	42623.6	5127.9	4142.21	NaN	71288.2	NaN	85279.8	332174	67169.4	42363.5	12428.7	NaN	124570	56518.8	69688.8	11888	144183	48034.9	31543.3	NaN	1.35088	37373.9	91820.3	177940	NaN	3822.42	14241.3	30043.8
P15291	B4GALT1	Beta-1,4-galactosyltransferase 1	B4GT1_HUMAN	105692	41657.7	63939.8	28492.8	56952.4	70267.3	44783.2	61545.1	84462.9	60072.1	39051	134546	31256.2	101145	37088.2	82152.3	23157.6	19222.7	34455.8	49371.6	69170.5	87344.7	63886.6	48079.2	96482	116462	99777.4	41828.4	75720.7	50068.9	69451.5	48779.5	43927.7	51882.4	55561.6	63832.4	91752.6	32801.7	104856	67245.7	49871.4	64167.9	69321.8	151143	71825.4	61329.3
P15309	ACP3	Prostatic acid phosphatase	PPAP_HUMAN	NaN	NaN	NaN	755541	1.23112	NaN	NaN	NaN	NaN	NaN	NaN	NaN	NaN	955013	NaN	NaN	NaN	NaN	6732.12	NaN	66719.8	NaN	934538	NaN	NaN	NaN	NaN	NaN	1.27138	NaN	NaN	NaN	NaN	1.23584	NaN	NaN	5534.03	15646.5	NaN	NaN	NaN	NaN	NaN	NaN	NaN	NaN
P15311	EZR	Ezrin	EZRI_HUMAN	NaN	NaN	NaN	NaN	NaN	NaN	NaN	NaN	NaN	NaN	NaN	NaN	NaN	NaN	NaN	NaN	NaN	NaN	NaN	NaN	NaN	NaN	NaN	NaN	NaN	NaN	NaN	NaN	NaN	NaN	NaN	NaN	NaN	NaN	NaN	NaN	NaN	NaN	NaN	NaN	NaN	NaN	NaN	NaN	NaN	NaN
P15374	UCHL3	Ubiquitin carboxyl-terminal hydrolase isozyme L3	UCHL3_HUMAN	2449.79	NaN	NaN	3892.36	NaN	25083.7	7596.67	NaN	NaN	11374.4	1	NaN	5216.98	NaN	649342	NaN	NaN	NaN	NaN	NaN	1809.27	NaN	NaN	NaN	1.27012	13154	NaN	9309.79	17354.2	NaN	5627.81	4274.46	1.08332	NaN	1.21629	NaN	23638.2	15627	NaN	5687.34	NaN	6399	1	7008.29	12874.8	1.31997
P15391	CD19	B-lymphocyte antigen CD19	CD19_HUMAN	NaN	NaN	NaN	16744.2	NaN	NaN	NaN	NaN	NaN	NaN	NaN	NaN	NaN	NaN	NaN	NaN	NaN	NaN	NaN	NaN	NaN	NaN	NaN	NaN	1.27012	NaN	NaN	NaN	1.27139	NaN	NaN	NaN	NaN	NaN	1.21631	NaN	NaN	NaN	NaN	NaN	NaN	NaN	NaN	NaN	NaN	NaN
P15515	HTN1	Histatin-1	HIS1_HUMAN	NaN	NaN	NaN	NaN	NaN	NaN	NaN	NaN	NaN	NaN	NaN	NaN	NaN	NaN	NaN	NaN	NaN	NaN	NaN	NaN	NaN	NaN	NaN	NaN	NaN	NaN	NaN	NaN	NaN	NaN	NaN	NaN	NaN	NaN	NaN	NaN	NaN	NaN	NaN	NaN	NaN	NaN	NaN	NaN	NaN	NaN
P15529	CD46	Membrane cofactor protein	MCP_HUMAN	39050.7	11995.5	10579	7548.09	NaN	27467.7	5861.35	13139.7	54458.1	22101.2	4576.67	138622	9412.03	23402.8	NaN	11472	43849	NaN	18412.1	NaN	648856	16842.6	20561.8	3160.23	4965.29	76342.1	32868.7	16381.6	10837.9	4732.26	8750.07	2770.31	12348.9	7343.93	3374.78	2632.47	5916.47	2122.94	25243.7	33753.4	9887.15	30139.4	17170.4	19000.3	16042.7	5826.23
P15531	NME1	Nucleoside diphosphate kinase A	NDKA_HUMAN	76950	56817.1	54518.1	126050	33675.4	189191	140929	103582	61197.7	82110.1	49802.5	35672.9	16107.5	79551.1	53121.2	81337.2	55224.6	20133.9	58361.6	32585.4	189640	50045.1	31178.8	40476.4	93394.4	96792.4	58321.2	118594	113824	16662.3	153680	73589.7	50734.2	54611.1	83748.1	64412	242676	117820	76441.1	61299.5	72857.2	85827.7	120468	63176.1	106820	70562.1
P15559	NQO1	NAD(P)H dehydrogenase [quinone] 1	NQO1_HUMAN	NaN	NaN	NaN	NaN	NaN	NaN	NaN	NaN	NaN	NaN	NaN	NaN	NaN	NaN	NaN	NaN	NaN	NaN	NaN	NaN	NaN	NaN	NaN	NaN	NaN	NaN	NaN	NaN	NaN	NaN	NaN	NaN	NaN	NaN	NaN	NaN	NaN	NaN	NaN	NaN	NaN	NaN	NaN	NaN	NaN	NaN
P15814	IGLL1	Immunoglobulin lambda-like polypeptide 1	IGLL1_HUMAN	1.39363	NaN	5369.2	NaN	81834.2	NaN	NaN	4451.08	49414	3393.55	3498.6	NaN	NaN	NaN	NaN	NaN	NaN	60323.6	NaN	1	NaN	NaN	NaN	3192.77	NaN	1.49744	NaN	2371.22	1594.04	13960.4	NaN	2910.72	NaN	NaN	NaN	NaN	NaN	NaN	1.35088	5092.7	NaN	NaN	4062.07	1.03556	NaN	NaN
P15822	HIVEP1	Zinc finger protein 40	ZEP1_HUMAN	27600.4	1.81312	1	NaN	409587	1.24128	NaN	1.21511	2.70598	7066	1	NaN	1.05134	1907.61	NaN	1	22991.9	NaN	8516.47	1	2469.42	1	1.04107	426.545	1.27012	13102.9	1.14763	1.64861	37881.7	219601	NaN	7637.86	1.08332	6164.28	1.21629	1.0817	7052.32	1	1620.84	1	NaN	1.61184	1	1.03557	5.7626	1.31997
P15907	ST6GAL1	Beta-galactoside alpha-2,6-sialyltransferase 1	SIAT1_HUMAN	NaN	NaN	NaN	NaN	NaN	NaN	7385.81	NaN	NaN	NaN	1	NaN	NaN	NaN	NaN	NaN	NaN	NaN	NaN	NaN	NaN	NaN	NaN	NaN	NaN	NaN	NaN	NaN	NaN	NaN	NaN	NaN	1.08332	NaN	NaN	1.0817	NaN	1	NaN	NaN	NaN	NaN	1	NaN	NaN	NaN
P15924	DSP	Desmoplakin	DESP_HUMAN	8788.78	3954.68	1779.2	18381.4	41608.6	1570.36	14275.6	455669	46365	65949.5	14491.7	35726.1	67402.6	19406.2	23416.9	24151.3	39338.9	1.03068	10174.1	12413.7	1726.81	18484.5	51356.7	14006.7	9723.95	5055.88	23651.6	45590.3	2597.19	14928	6292.76	73264.9	4548.63	39352.3	63678.2	7054.03	16481.3	4.90698e+06	114150	22873.2	36683	4680.47	17273.4	4656.72	7988.28	35692.4
P15941	MUC1	Mucin-1	MUC1_HUMAN	106506	82629.9	100156	12720.8	1.23112	39318	382568	20809	48816.6	79879.5	39105.2	247840	154838	114722	2.075	1955.71	259677	NaN	106428	18965.1	509590	139471	41159.2	96967	1.27012	46613	3.31381e+06	16051.1	484317	48202	23596.8	1.13403	23719.2	1.16494e+06	246422	94679	139094	22826.7	74777	45828.7	25974.9	132848	1	16982.7	8895.16	183826
P16035	TIMP2	Metalloproteinase inhibitor 2	TIMP2_HUMAN	26094.8	39212.6	45237.2	38961.8	48111	37311.5	26708.9	43980	101910	47138.4	52759.4	64826.1	40076.9	34276.2	63877.9	32521.6	78273.9	42867.7	51706.2	22688.7	44659.9	42864	28824.8	40281.7	60709.8	18771.3	32919	28898.2	29668.4	47259.2	43794.6	22592.1	16501.9	22516.3	64117	23063.4	43655	51280.1	47619.6	63003.6	19964.1	19845	57951.1	37975.2	24818.2	29071.7
P16070	CD44	CD44 antigen	CD44_HUMAN	4728209	3.96229e+06	3581334	3.85394e+06	3.09394e+06	4.46781e+06	2778487	3.73059e+06	5605958	7983344	3.12237e+06	5115140	3.23123e+06	4757057	4496044	3.77137e+06	9718681	1.43599e+06	4410482	2.99399e+06	58789800	4984441	4.87599e+06	3.02207e+06	5201560	4659689	5063020	7971695	3.48893e+06	3.49952e+06	5.89259e+06	4.10434e+06	5.50862e+06	3.81223e+06	4.31986e+06	4054695	3771526	2.87755e+06	4.11742e+06	6.58115e+06	5337917	8431133	4.29446e+06	7155227	5401793	5632412
P16083	NQO2	Ribosyldihydronicotinamide dehydrogenase [quinone]	NQO2_HUMAN	1.39363	11637.1	14490.7	34854.5	NaN	49064.9	11156.9	38431.3	6829.75	NaN	3634.9	1.04698	NaN	1.4883	NaN	3570.21	NaN	1.03068	6355.31	1113.49	16322.4	9546.75	NaN	12338.9	11833.5	1.49743	NaN	63805.3	29712.8	41898.6	3959.23	49026.5	5538.03	20124.9	NaN	NaN	25830.8	23375.1	21511.5	20701	NaN	60929.2	3267.69	8118.46	NaN	7547.42
P16109	SELP	P-selectin	LYAM3_HUMAN	83111.6	94617.9	49193.8	88220.5	23216.8	145655	40597.6	62529.1	51376.6	47517.4	76599.8	107630	61284.1	75629.7	55472.5	31500.2	70988.6	167811	50586.9	37165.3	86375.2	66718.5	32272.6	21584.1	66317.7	97643.9	29461.6	81684.8	31923.9	42458.4	39585.8	32865.8	63638.8	70907.4	97487.5	36593.1	32609.1	39314	76621.7	69354	96412.5	81472.8	46813.6	143316	78414.6	83401.1
P16112	ACAN	Aggrecan core protein	PGCA_HUMAN	39152.4	79357.8	62767.1	71688	107155	50396.1	50861.2	49391.6	125678	15932.8	17749.3	50340	26734	91948.3	65617.5	53501.5	274386	33321.2	35089.7	51646.3	32965.6	68840.7	61528.6	55090.5	93048.6	33938.3	73530.8	122620	77680.5	36970.9	56113.2	48674.3	52868.8	60580	129475	94787.4	63825.7	49156.7	78952.4	117547	120071	126109	80732.7	69667.5	120440	91346
P16150	SPN	Leukosialin	LEUK_HUMAN	NaN	NaN	NaN	NaN	NaN	NaN	NaN	NaN	NaN	NaN	NaN	NaN	NaN	NaN	NaN	NaN	NaN	NaN	NaN	NaN	NaN	NaN	NaN	NaN	NaN	NaN	NaN	137895	NaN	NaN	NaN	NaN	NaN	NaN	NaN	NaN	NaN	NaN	NaN	NaN	NaN	NaN	NaN	NaN	NaN	NaN
P16152	CBR1	Carbonyl reductase [NADPH] 1	CBR1_HUMAN	1.39363	7307.33	2978.69	11209.3	2364.45	13644.2	19594.1	14945.6	7190.68	60578.9	6081.08	4137.22	1357.89	20527.2	2.07502	1	NaN	43235	2729.27	2397.15	17225.1	7851.9	NaN	2114.07	1424.76	24216	3163.81	98583.5	4449.92	8233.28	14336.9	1.13404	2106.43	1.23584	5691.99	7034.56	28660.6	41268	11057	2785.28	8443.79	5669.59	5779.56	1.03556	13526.6	9796.65
P16157	ANK1	Ankyrin-1	ANK1_HUMAN	11725.3	7316.94	2332.93	1.30709	NaN	3834.8	10153.4	1522.69	1533.47	8522.55	32296.4	1.04698	3311.68	41816	2.07501	5873.79	1.30891e+06	642841	8720.19	1294.59	695299	1	1.04106	6881.09	4064.42	1.49742	NaN	2263.73	19683.9	7052.11	4863.61	867.199	6884.15	NaN	NaN	1529.17	8919.45	2417.58	7096.97	21563.2	2247.19	NaN	24616.4	19562.5	1.65535	1.31997
P16233	PNLIP	Pancreatic triacylglycerol lipase	LIPP_HUMAN	17051.5	NaN	6163.39	20367.8	4840.21	5990.59	9010.54	1.2151	NaN	12913.6	23089.8	4296.67	NaN	27637	6165.61	NaN	NaN	NaN	27746.2	1	1.19808	9148.83	11071.3	12043.2	20319.1	16678.9	19017.6	1.64861	10826.2	1	19085.2	1.13404	30993.7	1.23583	4004.32	1.0817	6111.56	10377.1	19789.9	18893.7	1.14119	4762.17	12143.7	4979.66	9395.26	20369.1
P16234	PDGFRA	Platelet-derived growth factor receptor alpha	PGFRA_HUMAN	NaN	NaN	NaN	NaN	NaN	9783.98	NaN	1.21511	NaN	1	1	4187.02	NaN	NaN	2.07502	1	NaN	1.03068	NaN	NaN	29110.1	NaN	NaN	11728.5	NaN	NaN	NaN	NaN	NaN	NaN	NaN	NaN	1.08332	1.23584	1.21629	NaN	1.07838	NaN	NaN	1	NaN	453.234	NaN	1.03556	1.65535	877.575
P16278	GLB1	Beta-galactosidase	BGAL_HUMAN	6969.89	NaN	NaN	NaN	NaN	1.24128	1	1.21511	NaN	NaN	NaN	6049.89	NaN	NaN	NaN	1	NaN	NaN	NaN	NaN	1.19808	1	1.04106	4924.77	NaN	6891.88	NaN	NaN	NaN	NaN	NaN	1.13404	5533.61	NaN	NaN	1.0817	NaN	6523.63	NaN	1	6099.28	8106.8	NaN	NaN	5672.67	6546.25
P16284	PECAM1	Platelet endothelial cell adhesion molecule	PECA1_HUMAN	99286.5	63017.8	51247	90071.1	33780.1	137493	67375.9	81080.6	16514.7	99577.6	59423.6	114036	52233.7	82686.7	59025.8	44419.7	88905.1	37989.5	78112.4	61716.5	59366.6	74356.8	73033.5	59908.5	111319	79880	66258.9	123288	27206.8	34254.5	66693	95860.3	59043	128291	106568	82569.8	19886.2	122814	86465.2	93064.8	43413.4	89063.6	38378.4	119890	131405	76015
P16401	H1-5	Histone H1.5	H15_HUMAN	NaN	NaN	NaN	NaN	NaN	NaN	NaN	NaN	NaN	NaN	NaN	NaN	NaN	NaN	NaN	NaN	NaN	NaN	NaN	NaN	NaN	NaN	NaN	NaN	NaN	NaN	NaN	NaN	NaN	NaN	NaN	NaN	NaN	NaN	NaN	NaN	NaN	80951	NaN	NaN	NaN	NaN	NaN	NaN	NaN	NaN
P16452	EPB42	Protein 4.2	EPB42_HUMAN	NaN	NaN	489717	NaN	NaN	NaN	92300.2	387541	NaN	NaN	NaN	NaN	NaN	5385.64	NaN	NaN	22432.5	NaN	NaN	NaN	NaN	NaN	NaN	140608	702645	NaN	NaN	NaN	160897	NaN	NaN	15525	NaN	NaN	NaN	NaN	49817.6	NaN	361665	NaN	NaN	NaN	NaN	NaN	NaN	NaN
P16499	PDE6A	Rod cGMP-specific 3',5'-cyclic phosphodiesterase subunit alpha	PDE6A_HUMAN	885843	281274	152397	226295	101724	40938.3	185368	133629	94305.3	234529	248565	114410	75302.1	1.0928e+06	184709	157746	NaN	NaN	176861	183574	108993	253243	221313	36340.3	192554	1157841	215794	426400	313952	124361	218676	53286.1	338383	161785	269771	326712	105075	114749	816887	157731	32341.7	504240	149942	308440	203028	211029
P16581	SELE	E-selectin	LYAM2_HUMAN	83233	24215	46037.2	80939.1	26958.6	46091.4	21660	82162.3	4120.89	73932.5	44376.3	68476.4	31578.2	61853.5	118331	25882.2	31947.7	60091.3	69699.7	25925.5	67226.8	74790.8	87805.6	35322	89132.2	106679	77193.2	43120.1	36781.8	73278.4	54040.7	52558.6	187787	47528	68069.7	54679.2	27975.6	48665.4	70578.3	78383.6	43866.9	99784	34140.4	332540	65844.3	33058.6
P16591	FER	Tyrosine-protein kinase Fer	FER_HUMAN	NaN	NaN	NaN	NaN	NaN	NaN	NaN	1.21511	NaN	NaN	1	NaN	NaN	NaN	NaN	NaN	4.31492	NaN	NaN	NaN	NaN	NaN	1.04107	NaN	NaN	NaN	NaN	NaN	NaN	NaN	NaN	NaN	NaN	NaN	NaN	NaN	NaN	395290	NaN	NaN	NaN	NaN	NaN	1.03557	NaN	NaN
P16615	ATP2A2	Sarcoplasmic/endoplasmic reticulum calcium ATPase 2	AT2A2_HUMAN	NaN	34690.6	NaN	NaN	NaN	5641.47	NaN	1.21511	NaN	1	1	NaN	1	1.48829	NaN	NaN	4.31492	NaN	NaN	1	1178.74	1	1	NaN	NaN	1.49742	2087.22	1.6486	NaN	NaN	NaN	1.13403	2359.82	NaN	NaN	1.08169	9270.52	3470.76	NaN	NaN	59786.6	NaN	1	3196.85	1.65533	NaN
P16671	CD36	Platelet glycoprotein 4	CD36_HUMAN	NaN	NaN	12320.8	NaN	NaN	27624.3	NaN	37998.3	NaN	52855.2	NaN	18128.7	14301.9	NaN	NaN	83874.2	NaN	NaN	15692.3	19655	22004.8	15737.1	NaN	45737.3	NaN	14094	NaN	NaN	7789.17	NaN	32912.8	25037.5	NaN	34427.5	22394.7	NaN	NaN	53129.8	NaN	55935.3	59115	NaN	NaN	15170.2	76183	90547.9
P16860	NPPB	Natriuretic peptides B	ANFB_HUMAN	NaN	NaN	NaN	NaN	NaN	NaN	NaN	NaN	NaN	NaN	NaN	NaN	NaN	NaN	NaN	NaN	NaN	NaN	NaN	NaN	65632.2	NaN	NaN	NaN	NaN	NaN	NaN	NaN	NaN	NaN	NaN	NaN	NaN	NaN	NaN	NaN	NaN	NaN	NaN	NaN	NaN	NaN	NaN	NaN	NaN	NaN
P16870	CPE	Carboxypeptidase E	CBPE_HUMAN	NaN	25253.1	NaN	NaN	NaN	NaN	NaN	NaN	NaN	9764.87	NaN	3967.01	NaN	NaN	NaN	NaN	NaN	8839.52	NaN	NaN	5070.15	NaN	NaN	NaN	NaN	NaN	NaN	NaN	NaN	1	NaN	4674.35	NaN	14282.5	NaN	NaN	NaN	NaN	NaN	6369.23	1445.54	NaN	NaN	NaN	NaN	NaN
P16871	IL7R	Interleukin-7 receptor subunit alpha	IL7RA_HUMAN	NaN	NaN	NaN	NaN	NaN	NaN	NaN	NaN	NaN	NaN	12572	8550.3	NaN	NaN	NaN	NaN	NaN	NaN	NaN	NaN	NaN	NaN	NaN	NaN	8969.83	3154.48	NaN	NaN	NaN	NaN	NaN	NaN	1.08332	13298.8	NaN	NaN	NaN	NaN	NaN	NaN	1.14119	NaN	NaN	NaN	9244.33	NaN
P16930	FAH	Fumarylacetoacetase	FAAA_HUMAN	413209	565819	212593	563772	223634	280065	307238	344595	405516	476191	530788	563477	237439	446063	536694	214319	525018	245446	242974	245232	1.34842e+06	256735	323067	338336	429723	583478	306922	466876	340061	256111	345103	446024	297777	396216	383882	185018	348047	75477.9	479308	361593	328221	600614	152973	264068	408649	347305
P17027	ZNF23	Zinc finger protein 23	ZNF23_HUMAN	206087	218414	18368	251655	NaN	101632	65184.4	47098.2	57709.3	239965	61175.2	699547	320746	504338	294001	388748	NaN	1.38749e+06	269073	NaN	270511	86890	209231	NaN	416211	560454	328767	361440	25203.5	484674	73858.7	490456	203471	341310	314035	166945	123105	181414	645222	45188.2	209008	57325.9	471626	374908	374511	187399
P17036	ZNF3	Zinc finger protein 3	ZNF3_HUMAN	NaN	18620.7	NaN	22607.6	39864.7	49814.2	54382.4	NaN	NaN	11525.2	38120.4	546867	57999.8	NaN	NaN	NaN	NaN	14812.8	NaN	NaN	NaN	24480	NaN	NaN	NaN	NaN	8931.94	NaN	NaN	NaN	NaN	NaN	NaN	NaN	10109.6	1738.87	NaN	NaN	NaN	NaN	44862.5	108792	26898.5	13548.2	40134.4	NaN
P17050	NAGA	Alpha-N-acetylgalactosaminidase	NAGAB_HUMAN	692226	20373.1	1.91525e+06	1.74982e+06	46903.6	1.57126e+06	NaN	NaN	22262.5	NaN	877092	16456.4	NaN	1.47028e+06	2.67592e+06	3789.35	1.30776e+06	9867.11	1	NaN	NaN	NaN	934290	4030.94	5954.52	950470	1.02877e+06	2.30662e+06	NaN	1.02475e+06	1565807	2.17521e+06	4619.85	900157	739316	4829.24	892046	1835.97	590530	NaN	1.99428e+06	813404	3971.93	NaN	2.41015e+06	453504
P17174	GOT1	Aspartate aminotransferase, cytoplasmic	AATC_HUMAN	126629	107634	73133.5	92935.3	49113.8	113798	103416	125659	61255	109399	93699.2	227903	46201.5	150613	122011	64576.9	251052	21254.6	114575	99108.7	592721	101589	69901.3	22735.8	99010.5	143461	103375	124100	86423.4	40877.5	112314	99373.8	133128	140344	76872.1	81860.8	111421	118260	173269	139461	115501	217188	64722.9	74781.6	175143	114602
P17181	IFNAR1	Interferon alpha/beta receptor 1	INAR1_HUMAN	12883.1	NaN	4194.42	4757.47	NaN	1084.58	2040.17	5300	NaN	1	NaN	NaN	1895.54	NaN	NaN	NaN	NaN	NaN	NaN	NaN	10170.4	5373.13	NaN	NaN	7285.5	10368.2	NaN	NaN	NaN	NaN	4332.91	NaN	NaN	NaN	8378.23	12174.7	NaN	1385.92	1.35088	NaN	10538.5	NaN	1336.09	5146.86	5692.66	9480.52
P17252	PRKCA	Protein kinase C alpha type	KPCA_HUMAN	1.39363	1.81311	1507.21	1.30708	4847	NaN	96.4948	925.327	NaN	1	264.124	982.946	4010.14	1.4883	2.07501	NaN	NaN	NaN	NaN	564.779	2366	550.042	NaN	7052.83	NaN	6559.02	NaN	1593.1	1773.2	1356.9	2171.48	1811.05	796.554	252.86	1.2163	1.0817	1.07838	1400.85	1.35088	NaN	1.14119	NaN	1	1.03557	4203.8	722.334
P17301	ITGA2	Integrin alpha-2	ITA2_HUMAN	50248.9	66341.7	36155.9	39049.7	79327.1	48172	43269.5	29534.1	56596.7	57525.2	70382.6	27704.1	61089.2	54810	4766.15	52654.2	21704.1	57349.8	48140.3	63848.6	6459.67	30494.2	88660.7	36199.9	52219.9	50875.4	38365.2	20202	30401.5	23874.3	70793.5	39233	19493.6	23891.5	44246.8	56907.1	45437.9	55921.2	46185.2	26238.1	57305.3	34824.7	35519.5	27128.5	72423.9	49448.5
P17405	SMPD1	Sphingomyelin phosphodiesterase	ASM_HUMAN	NaN	6512.61	8555.54	8390	16679.9	6894.56	NaN	6047.18	4370.59	15708	NaN	11582.1	NaN	7422.3	NaN	9756.18	NaN	NaN	16187	11797.7	1682.09	NaN	9317.69	19410.8	11532.5	3198.08	NaN	NaN	NaN	NaN	NaN	NaN	3234.53	NaN	NaN	1.08169	NaN	1371.85	NaN	3932.62	5738.29	NaN	1744.29	7944.59	8649.18	3698.58
P17481	HOXB8	Homeobox protein Hox-B8	HXB8_HUMAN	1.39363	1.81311	1	731.102	NaN	326.593	159.315	1.21511	NaN	1	1	NaN	569.973	1.48829	NaN	775.482	1996.19	NaN	1	1	1.19808	1	413.856	1	1.27012	NaN	1.14764	1.6486	1.27139	1	1.03778	NaN	1.08332	1.23584	1.21631	1.08169	1.07838	NaN	673.366	1	1.14119	NaN	NaN	1.03556	1.65533	1.31998
P17655	CAPN2	Calpain-2 catalytic subunit	CAN2_HUMAN	NaN	769711	NaN	1.1912e+06	NaN	98384.2	824711	NaN	NaN	54599.5	605825	NaN	NaN	NaN	NaN	743610	NaN	NaN	1.04723e+06	NaN	594760	NaN	1194562	NaN	1.83602e+06	NaN	NaN	NaN	NaN	NaN	NaN	1.11198e+06	NaN	1.33509e+06	1.42715e+06	NaN	978904	418570	1.27813e+06	NaN	NaN	1.10379e+06	NaN	NaN	NaN	NaN
P17661	DES	Desmin	DESM_HUMAN	1.39363	NaN	NaN	NaN	NaN	NaN	NaN	NaN	NaN	NaN	NaN	NaN	21094.6	NaN	NaN	10311.8	NaN	NaN	1	37133.3	NaN	NaN	NaN	NaN	NaN	NaN	NaN	NaN	NaN	NaN	NaN	NaN	NaN	NaN	NaN	NaN	NaN	NaN	50166.6	NaN	21319.2	NaN	NaN	NaN	NaN	24628.2
P17813	ENG	Endoglin	EGLN_HUMAN	179667	183646	163052	203644	101285	145166	144703	114459	75756	139464	222090	252672	149682	206601	194655	140633	148378	129184	187765	154301	150245	176408	200506	221396	238910	194524	184296	182614	154615	174977	203324	187039	198837	251527	289249	177843	115874	131082	220909	186341	239635	226729	73305.4	110299	195507	158617
P17844	DDX5	Probable ATP-dependent RNA helicase DDX5	DDX5_HUMAN	33741.3	208556	57962.7	236352	51442.4	274879	137830	149472	293355	244344	22231.4	101925	140081	76943.2	44310.4	NaN	120312	148392	165614	84139.8	22885.2	168122	248435	233286	257043	170473	83499.9	229495	217531	205174	95507.4	234520	195787	142748	165977	153924	240555	144005	146792	254344	216186	219579	271104	84549.7	117649	260570
P17900	GM2A	Ganglioside GM2 activator	SAP3_HUMAN	85809	57074.1	80000.5	12209.7	33376.4	83924.7	41989.7	97899.9	36104.5	58893.9	58924.9	130003	40179.1	88698.8	44562	70735	82127.6	66325.8	69459.6	37438.3	92226.5	58645.2	112180	46209.4	63502.2	92713.4	63385.2	72336.4	37081.7	1	72256.9	72934.2	41952.3	58906.8	47492.3	37537.7	139685	103052	91880.8	50131.1	36357.6	63540.5	103888	138556	84350.4	78306.1
P17927	CR1	Complement receptor type 1	CR1_HUMAN	8389.86	146054	15416.8	24041.7	NaN	123591	14265.9	110828	20456.6	30409.7	18561.9	11132.6	1169.13	12249.8	19211.7	152742	NaN	1.03068	50832.9	18530.9	131996	130295	301393	31297.6	129095	10412.5	1400.02	15983.2	220302	6844.9	102350	21549.5	16560.8	229240	26938.1	34475.4	20406.2	19622.5	20366.6	138168	10923.1	29897	217835	127433	13720.9	330735
P17931	LGALS3	Galectin-3	LEG3_HUMAN	67662.6	30716	82622.8	86576.8	35344.8	81854	76461.1	32604.6	119815	82576.7	93464.3	83349.5	77758.1	66271.2	66369.5	88288.1	78679.7	51826.4	75407.8	84891.3	72273.7	93251.2	44611.7	87308.9	66152.2	77109.9	160865	81099.2	76507.7	57980.3	45026.8	37329	81695.8	112541	68666.1	66168.1	58242	156166	29946.4	53609.3	35585	39607.1	47243.4	97921.7	57537.6	52738.1
P17936	IGFBP3	Insulin-like growth factor-binding protein 3	IBP3_HUMAN	1338869	2.00903e+06	1.51795e+06	1.17298e+06	1.79732e+06	958758	1.56653e+06	1.20663e+06	1749969	531525	999130	132096	2.30699e+06	1.36185e+06	2118348	1235854	1.44766e+06	1.87998e+06	1.00928e+06	719353	645730	883218	712629	2151449	2.04967e+06	1528645	1.60772e+06	797906	1.95598e+06	1363122	641427	536642	695408	609051	869475	823474	1.00082e+06	1.00641e+06	1.24213e+06	354118	1.16049e+06	457742	1.39762e+06	891166	624758	1.09256e+06
P17980	PSMC3	26S proteasome regulatory subunit 6A	PRS6A_HUMAN	NaN	NaN	NaN	NaN	NaN	NaN	38359.9	NaN	NaN	NaN	NaN	NaN	NaN	NaN	NaN	NaN	NaN	NaN	NaN	NaN	NaN	NaN	NaN	NaN	NaN	NaN	NaN	NaN	45007.6	NaN	NaN	NaN	NaN	NaN	NaN	NaN	1258.88	18011.6	NaN	NaN	NaN	NaN	NaN	NaN	NaN	NaN
P17987	TCP1	T-complex protein 1 subunit alpha	TCPA_HUMAN	NaN	NaN	NaN	NaN	NaN	NaN	6103.95	NaN	NaN	2474.28	NaN	NaN	NaN	NaN	NaN	1	NaN	NaN	NaN	NaN	NaN	NaN	NaN	NaN	NaN	NaN	NaN	NaN	2522.82	NaN	NaN	NaN	NaN	NaN	NaN	NaN	17064.1	32704.3	NaN	NaN	NaN	NaN	NaN	8483.53	NaN	NaN
P18054	ALOX12	Polyunsaturated fatty acid lipoxygenase ALOX12	LOX12_HUMAN	NaN	5601.02	NaN	NaN	NaN	27099.2	NaN	10022.3	NaN	NaN	NaN	NaN	NaN	NaN	NaN	NaN	NaN	NaN	NaN	NaN	NaN	NaN	NaN	NaN	NaN	NaN	NaN	NaN	NaN	NaN	NaN	NaN	1748.08	NaN	NaN	NaN	NaN	6023.84	NaN	7675.54	11007.4	NaN	NaN	13786.2	18077.2	1.31997
P18065	IGFBP2	Insulin-like growth factor-binding protein 2	IBP2_HUMAN	44867.2	279931	134858	NaN	51617.4	38365.2	73717.2	10189.2	133828	2861.17	20033.1	95998.2	138828	65040.7	51467.3	16560.2	674043	77413.6	57370.7	10690.4	357294	12382.5	11761.4	100539	67676.7	52758.4	41148.1	41575.1	129895	21983.8	13157.2	16006.3	15455.2	2294.92	1.2163	1.0817	17816.6	30750.6	22423.9	34387.7	51559.7	20176.2	54496.9	24883.9	199157	NaN
P18085	ARF4	ADP-ribosylation factor 4	ARF4_HUMAN	156085	NaN	NaN	NaN	1.23112	17330.3	NaN	20722.2	NaN	NaN	NaN	22244	NaN	252214	NaN	NaN	NaN	NaN	NaN	20491.8	NaN	NaN	NaN	NaN	NaN	NaN	NaN	NaN	38279.1	NaN	143457	169877	NaN	NaN	NaN	NaN	NaN	1097.58	NaN	1	78441.7	NaN	NaN	3721.58	1.65533	NaN
P18124	RPL7	60S ribosomal protein L7	RL7_HUMAN	NaN	NaN	NaN	NaN	NaN	NaN	NaN	NaN	NaN	NaN	NaN	NaN	NaN	1.4883	NaN	NaN	NaN	NaN	NaN	NaN	NaN	NaN	NaN	NaN	NaN	NaN	NaN	NaN	NaN	NaN	NaN	NaN	NaN	NaN	NaN	NaN	NaN	57499.9	NaN	NaN	NaN	NaN	NaN	NaN	NaN	NaN
P18206	VCL	Vinculin	VINC_HUMAN	300802	420130	202045	669412	278552	1.11699e+06	147285	375673	82765.1	404620	156789	208977	166692	387752	111375	80171.6	85126.7	82295.2	263809	175124	322554	252467	121943	128122	183413	378051	235304	97126.3	84058.8	37547.8	128148	83005.4	503698	109969	725236	187164	191980	273413	328893	366121	589210	175573	74381.6	555910	871980	362714
P18428	LBP	Lipopolysaccharide-binding protein	LBP_HUMAN	1.97816e+06	1.57749e+06	2.76936e+06	671132	1.5157e+06	1.22524e+06	2.58796e+06	1.84026e+06	4.33109e+06	4389531	1.62096e+06	1.9155e+06	1.74056e+06	3055885	615089	2765814	858016	2.46641e+06	2327672	2116810	2.88234e+06	2.28796e+06	2.5206e+06	1.11168e+06	2.30038e+06	2.70737e+06	1.73116e+06	1419019	1068959	1.31863e+06	2100939	2.16785e+06	3756298	2.45768e+06	1.7673e+06	6551172	2.67257e+06	2.00645e+06	2.85723e+06	1.18874e+06	1513670	1.39315e+06	3.47e+06	5.88873e+06	1.20181e+06	1.86732e+06
P18510	IL1RN	Interleukin-1 receptor antagonist protein	IL1RA_HUMAN	NaN	NaN	NaN	NaN	NaN	NaN	NaN	NaN	NaN	NaN	NaN	NaN	NaN	NaN	NaN	NaN	NaN	NaN	NaN	NaN	NaN	NaN	NaN	NaN	NaN	NaN	NaN	NaN	NaN	NaN	NaN	NaN	NaN	NaN	NaN	NaN	NaN	37014.9	NaN	NaN	NaN	NaN	NaN	NaN	NaN	NaN
P18583	SON	Protein SON	SON_HUMAN	15756.2	1707.27	2296.02	NaN	NaN	NaN	1359.64	2271.58	NaN	NaN	2884.01	1.04698	34063.8	13327	NaN	NaN	NaN	NaN	4589.55	5607.21	1237.16	1	NaN	NaN	7938.21	11398.6	NaN	2235.05	NaN	NaN	NaN	5318.58	3163.39	4049.72	3328.99	1865.68	NaN	1781	NaN	1129.39	7102.96	NaN	1345.06	5126.28	9200.86	NaN
P18669	PGAM1	Phosphoglycerate mutase 1	PGAM1_HUMAN	68762.5	54300.1	49007.8	58136.5	31966.4	130591	57084.2	52553.7	60661.9	67942	28945.9	21816.4	4352.98	101550	9743.55	56574.5	221440	197273	62946	17177.3	326121	58962.4	14361.6	73644.3	65554.5	44498.7	67416.6	83126.2	112735	26946.1	59480.5	55435.4	68930.8	71290.3	68261.7	55808.7	34798.9	114706	74503.5	58558.8	56001.7	112542	57147.7	76193.9	84678.2	79076.4
P18827	SDC1	Syndecan-1	SDC1_HUMAN	34493.4	NaN	100962	33004	NaN	NaN	12476.6	22497	NaN	229335	21237.5	57344.7	6874.23	133800	NaN	NaN	71109.4	NaN	91180.4	NaN	2.31337e+06	105040	NaN	NaN	72027.5	100959	86857.2	55197.9	138766	NaN	50143.7	18641.7	117464	59209.8	NaN	41628.1	54273.2	67143.3	167048	133256	NaN	117310	NaN	191106	NaN	20717.1
P18848	ATF4	Cyclic AMP-dependent transcription factor ATF-4	ATF4_HUMAN	NaN	NaN	NaN	NaN	NaN	NaN	NaN	NaN	NaN	NaN	NaN	1487.58	NaN	NaN	2.07501	NaN	NaN	NaN	NaN	NaN	NaN	NaN	NaN	NaN	NaN	NaN	NaN	NaN	NaN	NaN	NaN	NaN	NaN	NaN	NaN	NaN	NaN	NaN	NaN	NaN	NaN	NaN	NaN	NaN	NaN	NaN
P18850	ATF6	Cyclic AMP-dependent transcription factor ATF-6 alpha	ATF6A_HUMAN	40964	83986.5	31610.4	37502.3	5436.69	41083.4	30729.8	23875.8	47144.9	73875.3	8012.15	58031	84809.9	48515.3	131801	41336.9	53575.3	34400.7	37248.7	42535.1	45839.4	46946.1	42390.5	61183.9	51883.8	38592.8	40031.3	32331.3	56783.6	30943.1	55284.6	42178.6	28811	34149.6	40712	42552.1	44035.5	42390.2	98929.2	70604.9	58033.5	46398.6	31718.9	55489.3	43361.9	33841.5
P19012	KRT15	Keratin, type I cytoskeletal 15	K1C15_HUMAN	1126.71	NaN	NaN	NaN	1105.58	NaN	NaN	8695.25	24095.8	4415.42	NaN	NaN	1.05133	NaN	NaN	NaN	4.31492	1.03068	1	1	1.19808	NaN	NaN	NaN	NaN	NaN	1.14763	1.6486	NaN	1	1.03778	NaN	NaN	1.23583	NaN	1.08169	NaN	20797.7	NaN	NaN	NaN	NaN	1	1.03556	NaN	NaN
P19013	KRT4	Keratin, type II cytoskeletal 4	K2C4_HUMAN	NaN	NaN	NaN	NaN	NaN	28224.5	NaN	6665.62	233947	NaN	2835.08	NaN	1.05133	NaN	NaN	NaN	NaN	296735	NaN	616757	NaN	NaN	15286.4	NaN	NaN	NaN	7279.43	NaN	NaN	NaN	26495.1	NaN	NaN	NaN	NaN	NaN	1.07838	27108.6	NaN	NaN	1.14119	5142	1	1.03556	NaN	NaN
P19021	PAM	Peptidyl-glycine alpha-amidating monooxygenase	AMD_HUMAN	39231.4	71648.9	39835.2	21862.9	48101.6	53514.5	50782	36723.9	102355	38163.8	72921.2	69885.2	39352.7	47529.7	35002.2	37594	75154.6	52076.9	21007.1	59959.7	48755.1	51359.5	70715.6	39430.5	62239.3	44808.6	54206.3	14046.5	29490.8	41393.4	53427.2	26366.7	21855.5	18762.8	38292.5	55610.7	50062	35899	38886.8	77814.2	43647.1	28152.1	66523.1	41843.4	35114.8	39400.4
P19022	CDH2	Cadherin-2	CADH2_HUMAN	249058	130996	88756.4	98868.2	441491	143040	134070	136992	139844	113773	136800	188800	72171.1	158063	127045	117255	149612	87334	101535	89599.4	183102	104003	79662.3	70102.7	85410.9	156956	59159.2	138050	87062.2	609068	81702.9	102853	142251	100062	41862.3	74123	98777.4	88269.8	151733	147010	74761.8	98583.2	60903.5	179252	204037	118380
P19237	TNNI1	Troponin I, slow skeletal muscle	TNNI1_HUMAN	93253.4	NaN	NaN	NaN	NaN	NaN	90465.2	19350.4	NaN	98613.7	1	NaN	NaN	99206.8	NaN	NaN	NaN	NaN	1	NaN	10699.1	NaN	NaN	NaN	NaN	168460	NaN	72735.9	99406.7	NaN	53148.9	NaN	NaN	15109.3	NaN	27911.7	167331	NaN	135415	NaN	27354.3	NaN	25811	NaN	NaN	NaN
P19256	CD58	Lymphocyte function-associated antigen 3	LFA3_HUMAN	132181	428810	186918	455019	95814.5	321202	NaN	102967	122172	28706	132653	124397	NaN	97477.4	107303	125992	437973	99721.7	329613	180251	165487	171242	212097	130391	671044	191733	86094	513264	255060	155643	21732.2	384653	159274	312473	357952	108597	267451	226185	261027	155887	251099	177885	29817.1	103563	557307	402397
[truncated: 2,572 more rows]
[truncated: 668 more columns]

## Sheet: Key
new_id	plate	coordinate
Pool 11	1	D3
Pool 12	1	G10
Pool 13	1	A2
Pool 14	1	B5
Pool 15	1	H2
Pool 16	1	B9
Pool 21	2	H1
Pool 22	2	E2
Pool 23	2	C2
Pool 24	2	B7
Pool 25	2	F3
Pool 26	2	H11
Pool 31	3	H4
Pool 32	3	B11
Pool 33	3	A10
Pool 34	3	A3
Pool 35	3	H6
Pool 36	3	G10
Pool 41	4	C5
Pool 42	4	C6
Pool 43	4	H2
Pool 44	4	F7
Pool 45	4	A9
Pool 46	4	F3
Pool 51	5	G11
Pool 52	5	C5
Pool 53	5	H6
Pool 54	5	A12
Pool 55	5	G9
Pool 56	5	D1
Pool 61	6	H10
Pool 62	6	E2
Pool 63	6	C9
[truncated: 623 more rows]
