# Supplementary material for: Multidimensional proteomics and explainable AI feature selection identify cross-platform lung cancer molecular signature in blood plasma
Source: Research Square preprint supplement (doi:10.21203/rs.3.rs-7660411/v1), 2025-10-31
Supplement: Supplementary file 4 [file b976933f2ef85e64ba84cc2d.xlsx]

## Sheet: DNA-APT data
PlateId	PlateRunDate	ScannerID	PlatePosition	SlideId	Subarray	SampleId	SampleType	PercentDilution	SampleMatrix	Barcode	Barcode2d	SampleName	SampleNotes	AliquotingNotes	SampleDescription	AssayNotes	TimePoint	ExtIdentifier	SsfExtId	SampleGroup	SiteId	SubjectID	CLI	RMA	HybControlNormScale	RowCheck	NormScale_20	NormScale_0_005	NormScale_0_5	ANMLFractionUsed_20	ANMLFractionUsed_0_005	ANMLFractionUsed_0_5	seq.10047.12	seq.10076.1	seq.10623.19	seq.11232.46	seq.11265.8	seq.11388.75	seq.11450.110	seq.11568.2	seq.11615.16	seq.11617.1	seq.11636.33	seq.12014.19	seq.12376.85	seq.12580.7	seq.13722.105	seq.14110.200	seq.15509.2
PLT35083	2024-10-30	SG14464449	G9	258740119478	7	230420	Calibrator	20	NA	0443934024	0443934024	650-00075 11K Plasma Calibrator	NA	NA	11K Plasma Calibrator	NA	NA	EXID40000012002431	EID1348559	NA	NA	NA	NA	NA	0.922527	PASS	1.0262	1.11258	1.0457	NA	NA	NA	351.5	1028.7	416.1	2204.2	1458.7	3611	4132.6	1334.2	33494.9	866.7	8831.1	395.5	1790	644.4	81330.5	3112.8	6969.1
PLT35083	2024-10-30	SG14464449	H12	258740119427	8	230420	Calibrator	20	NA	0443933990	0443933990	650-00075 11K Plasma Calibrator	NA	NA	11K Plasma Calibrator	NA	NA	EXID40000012002449	EID1348561	NA	NA	NA	NA	NA	0.862861	PASS	1	1.00681	1	NA	NA	NA	352.7	1060.3	426.5	2165.9	1455.4	3391.9	4192.9	1429.7	24454.4	919.9	8346.2	392.6	1755.6	740.2	71393.9	3099.3	6805.7
PLT35082	2024-10-30	SG16064525	G3	258740119677	7	230420	Calibrator	20	NA	0443933996	0443933996	650-00075 11K Plasma Calibrator	NA	NA	11K Plasma Calibrator	NA	NA	EXID40000012003459	EID1348657	NA	NA	NA	NA	NA	1	PASS	1.04307	1.04654	1.05578	NA	NA	NA	355.8	1051.3	405.8	2236.2	1407.1	4057.8	3897.7	1353.5	36859.8	862.7	8819	405.4	1962.7	653.8	80697.6	3112.8	7173.4
PLT35083	2024-10-30	SG14464449	B5	258740119474	2	230420	Calibrator	20	NA	0443933991	0443933991	650-00075 11K Plasma Calibrator	NA	NA	11K Plasma Calibrator	NA	NA	EXID40000012002868	EID1348557	NA	NA	NA	NA	NA	1.05462	PASS	0.988957	1	0.968537	NA	NA	NA	358	1013	436.4	2229.9	1458.5	3763.6	3966.1	1317.3	34198.7	897.8	7956.8	406.3	1889.7	675.6	71406.6	3183.9	6453
PLT35083	2024-10-30	SG14464449	C11	258740119426	3	230420	Calibrator	20	NA	0443934025	0443934025	650-00075 11K Plasma Calibrator	NA	NA	11K Plasma Calibrator	NA	NA	EXID40000012002446	EID1348562	NA	NA	NA	NA	NA	0.938844	PASS	1.02688	0.983681	1	NA	NA	NA	429.8	1060.8	419	2195.9	1396.6	3621.5	3939	1228.2	31919.5	887.3	8319.8	405.4	1819	697.1	75327.6	3099.5	6287.9
PLT35082	2024-10-30	SG16064525	C1	258740119675	3	230420	Calibrator	20	NA	0443934008	0443934008	650-00075 11K Plasma Calibrator	NA	NA	11K Plasma Calibrator	NA	NA	EXID40000012003096	EID1348656	NA	NA	NA	NA	NA	1.13421	PASS	0.939003	0.979264	0.946174	NA	NA	NA	427.9	1078.7	442.6	2178.6	1463.2	3588.6	3721.4	1221.3	31919.5	932	7751.4	408.2	1790	842	68439.3	3192.3	6317.4
PLT35193	2024-11-01	SG15214477	B4	258740119658	2	230420	Calibrator	20	NA	0443934031	0443934031	650-00075 11K Plasma Calibrator	NA	NA	11K Plasma Calibrator	NA	NA	EXID40000012005927	EID1349047	NA	NA	NA	NA	NA	1.09457	PASS	0.980235	1	0.981036	NA	NA	NA	344.3	1059.5	419.3	2112	1379.4	3861.7	3843.9	1309.8	33700.5	879.1	7723.9	405.4	1952	697.1	73903.5	3159.2	6435.4
PLT35193	2024-11-01	SG15214477	E7	258740119661	5	230420	Calibrator	20	NA	0443933989	0443933989	650-00075 11K Plasma Calibrator	NA	NA	11K Plasma Calibrator	NA	NA	EXID40000012005926	EID1349042	NA	NA	NA	NA	NA	0.850128	PASS	1.10891	1.07521	1.04333	NA	NA	NA	340.5	1060.3	426.5	2195.9	1459.1	3840.3	3966.1	1393.1	36576.4	878.8	8417	392.8	1880.5	630	80004.4	2989	6780.9
PLT35082	2024-10-30	SG16064525	E12	258740119618	5	230420	Calibrator	20	NA	0443934005	0443934005	650-00075 11K Plasma Calibrator	NA	NA	11K Plasma Calibrator	NA	NA	EXID40000012003661	EID1348649	NA	NA	NA	NA	NA	0.909623	PASS	1	1	1.01039	NA	NA	NA	358	1060.3	413.7	2212.2	1455.4	3611	3978.4	1326.9	29435.8	889.4	8319.8	398.5	1711.6	694.1	72961.9	2968.3	6404.1
PLT35082	2024-10-30	SG16064525	F6	258740119680	6	230420	Calibrator	20	NA	0443933995	0443933995	650-00075 11K Plasma Calibrator	NA	NA	11K Plasma Calibrator	NA	NA	EXID40000012003655	EID1348658	NA	NA	NA	NA	NA	1	PASS	0.953244	0.998887	0.983899	NA	NA	NA	364.3	1049.2	431.7	2082.5	1401.7	3862.4	4038.9	1317.3	31567.3	897.8	8356	436.6	1913.5	865.5	73546	3126.8	6797.8
PLT35193	2024-11-01	SG15214477	A9	258740119663	1	230420	Calibrator	20	NA	0443934030	0443934030	650-00075 11K Plasma Calibrator	NA	NA	11K Plasma Calibrator	NA	NA	EXID40000012005535	EID1349041	NA	NA	NA	NA	NA	0.928948	PASS	1	1.01093	1	NA	NA	NA	371.3	1055.6	426	2321.8	1545	3611	4062	1251.6	30485.5	897.8	8319.8	389.7	1616	1034.4	63275.8	3091.1	6453
PLT35083	2024-10-30	SG14464449	F2	258740119471	6	230420	Calibrator	20	NA	0443934026	0443934026	650-00075 11K Plasma Calibrator	NA	NA	11K Plasma Calibrator	NA	NA	EXID40000012003064	EID1348556	NA	NA	NA	NA	NA	1.09628	PASS	0.963007	0.916299	0.949598	NA	NA	NA	388.3	1079.5	428	2075.1	1409.5	3516.1	3761	1203.3	31832.4	931.2	7963.6	415.4	1728.8	738.1	73546	3277.4	6286.9
PLT35082	2024-10-30	SG16064525	A7	258740119681	1	230420	Calibrator	20	NA	0443934007	0443934007	650-00075 11K Plasma Calibrator	NA	NA	11K Plasma Calibrator	NA	NA	EXID40000012003086	EID1348655	NA	NA	NA	NA	NA	0.998946	PASS	1.00784	1	1	NA	NA	NA	356.2	1083.4	426.5	2195.9	1461	3410.4	3966.1	1208.8	34007.2	925.5	7607.9	394.9	1759.4	697.1	75045.8	2938.7	6453
PLT35193	2024-11-01	SG15214477	F12	258740119650	6	230420	Calibrator	20	NA	0443934021	0443934021	650-00075 11K Plasma Calibrator	NA	NA	11K Plasma Calibrator	NA	NA	EXID40000012006104	EID1349046	NA	NA	NA	NA	NA	0.893933	PASS	0.999492	1	1	NA	NA	NA	373	1077.1	429.8	2208	1446.5	3513.6	4033.5	1317.3	30367.3	943.8	8338.1	408.1	1702.4	713.9	73546	3211.2	7098.1
PLT35193	2024-11-01	SG15214477	H2	258740119656	8	230420	Calibrator	20	NA	0443933992	0443933992	650-00075 11K Plasma Calibrator	NA	NA	11K Plasma Calibrator	NA	NA	EXID40000012005548	EID1349048	NA	NA	NA	NA	NA	1.08562	PASS	1	0.938993	1	NA	NA	NA	358	1124.4	435	2191.5	1455.4	3602.6	3770.2	1335.2	31919.5	954	7757	408	1790	691.9	72722.8	3112.8	6233.1
PLT35083	2024-10-30	SG14464449	A6	258740119475	1	230421	QC	20	NA	0443701333	0443701333	650-00076 11K Plasma QC1 Sample	NA	NA	11K Plasma QC1 Sample	NA	NA	EXID40000012002852	EID1348553	NA	NA	NA	NA	NA	0.995411	PASS	0.987143	1.10101	1.03128	0.94	0.982	0.955	485	910.1	322.6	2154.1	1795.7	3558.9	4046.2	501.9	19629.6	743.6	4410.9	178.4	1252.9	529.8	78984.6	2161.5	5223.6
PLT35083	2024-10-30	SG14464449	E10	258740119479	5	230421	QC	20	NA	0443701268	0443701268	650-00076 11K Plasma QC1 Sample	NA	NA	11K Plasma QC1 Sample	NA	NA	EXID40000012002444	EID1348560	NA	NA	NA	NA	NA	0.965196	PASS	1.01565	1.04243	1.06744	0.939	0.959	0.956	500.1	877	328.8	2103.8	1625	3834.7	4088.9	503.9	23332.4	715.3	4384.6	188.3	1316.3	512.3	86958.8	2204.9	5429.1
PLT35082	2024-10-30	SG16064525	D4	258740119678	4	230421	QC	20	NA	0443701284	0443701284	650-00076 11K Plasma QC1 Sample	NA	NA	11K Plasma QC1 Sample	NA	NA	EXID40000012003100	EID1348653	NA	NA	NA	NA	NA	1.09914	PASS	0.900055	1.03901	0.950864	0.942	0.982	0.955	465.7	894.9	317.2	2013.9	1538.6	3827.9	3636.5	487.1	20792	784.8	4412.5	193.2	1250.9	718.1	79537.2	2240.7	5118.1
PLT35083	2024-10-30	SG14464449	H4	258740119473	8	230421	QC	20	NA	0443701282	0443701282	650-00076 11K Plasma QC1 Sample	NA	NA	11K Plasma QC1 Sample	NA	NA	EXID40000012003060	EID1348554	NA	NA	NA	NA	NA	1.06794	PASS	0.959071	0.98805	0.949912	0.935	0.982	0.953	480.9	909.7	316	2124	1683.2	3519.6	3853.4	505.7	21918.9	751.5	4830.7	190.8	1189.7	530.5	82202.5	2344.2	5358
PLT35193	2024-11-01	SG15214477	G10	258740119664	7	230421	QC	20	NA	0443701288	0443701288	650-00076 11K Plasma QC1 Sample	NA	NA	11K Plasma QC1 Sample	NA	NA	EXID40000012005945	EID1349040	NA	NA	NA	NA	NA	0.925848	PASS	1.06158	1.14534	1.10641	0.938	0.968	0.955	456.3	905.3	318.4	2247.8	1597.8	3785.4	3870.3	486.3	24031.8	746.2	4820.6	181.1	1203.7	538.4	79334.3	2349.8	5749.2
PLT35082	2024-10-30	SG16064525	B5	258740119679	2	230421	QC	20	NA	0443701633	0443701633	650-00076 11K Plasma QC1 Sample	NA	NA	11K Plasma QC1 Sample	NA	NA	EXID40000012003465	EID1348651	NA	NA	NA	NA	NA	1.0983	PASS	0.980627	1.16836	1.0112	0.939	0.973	0.953	456.4	921.3	318.9	2182.6	1695.6	3930.9	3872.5	466.1	22768.2	751.1	4374.2	180.9	1232.5	624.2	76463.5	2205.3	4954.5
PLT35082	2024-10-30	SG16064525	G11	258740119617	7	230421	QC	20	NA	0443701324	0443701324	650-00076 11K Plasma QC1 Sample	NA	NA	11K Plasma QC1 Sample	NA	NA	EXID40000012003480	EID1348650	NA	NA	NA	NA	NA	0.899213	PASS	1.08419	1.35517	1.17784	0.934	0.946	0.955	528	919.4	313.9	2141.3	1665.9	3702.4	4085.1	503.7	20611.7	743.3	4647.2	181.5	1145.9	577.4	86869.9	2162.4	5171.2
PLT35193	2024-11-01	SG15214477	D1	258740119655	4	230421	QC	20	NA	0443701297	0443701297	650-00076 11K Plasma QC1 Sample	NA	NA	11K Plasma QC1 Sample	NA	NA	EXID40000012005915	EID1349045	NA	NA	NA	NA	NA	1	PASS	0.974418	1.0668	1.0415	0.93	0.919	0.945	438.3	969.4	280.5	2135.6	1550.3	3656.4	3639.1	513.8	16727.2	781.1	4614.7	196.6	1167.9	582.6	71838.1	2163.1	4929.9
PLT35193	2024-11-01	SG15214477	F3	258740119657	6	230421	QC	20	NA	0443701298	0443701298	650-00076 11K Plasma QC1 Sample	NA	NA	11K Plasma QC1 Sample	NA	NA	EXID40000012005526	EID1349050	NA	NA	NA	NA	NA	1.00355	PASS	0.958953	1.14853	1.0528	0.944	0.973	0.959	446.9	894.3	322	2051	1565.8	3675.2	3550.7	461.3	23354.6	771.9	4529.6	194.3	1238.1	631.7	81744.3	2277.5	5080.2
PLT35083	2024-10-30	SG14464449	C1	258740119470	3	240432	Buffer	20	NA	0409258330	0409258330	650-00033 Filled Tube, Blank	NA	NA	Filled Tube, Blank	NA	NA	EXID40000012003062	EID1348558	NA	NA	NA	NA	NA	1.50045	PASS	1.01622	1	1.12436	NA	NA	NA	138.7	309.4	67	200.2	118.1	137.9	134	111.5	12	337	297	35.7	183.7	65.5	265	151	114
PLT35082	2024-10-30	SG16064525	E2	258740119676	5	240432	Buffer	20	NA	0409258333	0409258333	650-00033 Filled Tube, Blank	NA	NA	Filled Tube, Blank	NA	NA	EXID40000012003075	EID1348652	NA	NA	NA	NA	NA	1.03637	PASS	1.02097	1.00614	1	NA	NA	NA	101.4	304.2	74	192.7	118.4	136.8	107.7	109.8	13.5	352.8	265.5	35.9	185.9	74.7	239.8	154	101.8
PLT35193	2024-11-01	SG15214477	C6	258740119660	3	240432	Buffer	20	NA	0421964803	0421964803	650-00033 Filled Tube, Blank	NA	NA	Filled Tube, Blank	NA	NA	EXID40000012005937	EID1349044	NA	NA	NA	NA	NA	1.04528	PASS	0.988086	1.01678	0.943239	NA	NA	NA	117.8	351.9	88.6	250.4	136.8	139.5	123.4	121.5	15.1	401.1	395.7	42.2	200	95	296.5	195.5	140.7
PLT35083	2024-10-30	SG14464449	D8	258740119477	4	240432	Buffer	20	NA	0409258329	0409258329	650-00033 Filled Tube, Blank	NA	NA	Filled Tube, Blank	NA	NA	EXID40000012002428	EID1348552	NA	NA	NA	NA	NA	0.99239	PASS	1	1.02521	1	NA	NA	NA	117.4	288.6	72.5	194.4	119	132.5	128.4	112.7	15.6	335.3	285.1	35	180.4	74.9	208.5	157.4	124.9
PLT35193	2024-11-01	SG15214477	G5	258740119659	7	240432	Buffer	20	NA	0421964804	0421964804	650-00033 Filled Tube, Blank	NA	NA	Filled Tube, Blank	NA	NA	EXID40000012006101	EID1349049	NA	NA	NA	NA	NA	1.11686	PASS	1.02929	0.994034	1.01235	NA	NA	NA	109.7	362.1	80.9	239.7	137.1	140.2	137	130.2	17	391.3	376.9	38.1	197.7	82.6	246.4	202.7	143.6
PLT35083	2024-10-30	SG14464449	F7	258740119476	6	240432	Buffer	20	NA	0409258328	0409258328	650-00033 Filled Tube, Blank	NA	NA	Filled Tube, Blank	NA	NA	EXID40000012002855	EID1348555	NA	NA	NA	NA	NA	1.09107	PASS	0.983736	0.888935	0.907045	NA	NA	NA	113	298.2	71.5	189.2	118.9	135.8	130.5	103.2	21.5	334.6	273.3	39.7	186.3	73.4	198.6	149.3	125.4
PLT35193	2024-11-01	SG15214477	D11	258740119619	4	240432	Buffer	20	NA	0421964805	0421964805	650-00033 Filled Tube, Blank	NA	NA	Filled Tube, Blank	NA	NA	EXID40000012005524	EID1349043	NA	NA	NA	NA	NA	1	PASS	1	1	1	NA	NA	NA	115.2	336	85.5	247.4	132.8	140.9	136.1	132.4	11.8	392	374.8	37.2	175.6	91.2	399.8	202.3	137.7
PLT35082	2024-10-30	SG16064525	B10	258740119684	2	240432	Buffer	20	NA	0409258332	0409258332	650-00033 Filled Tube, Blank	NA	NA	Filled Tube, Blank	NA	NA	EXID40000012003474	EID1348654	NA	NA	NA	NA	NA	0.997586	PASS	0.878698	1	0.983967	NA	NA	NA	103	270.5	73.3	187.3	119.4	135.5	112.6	108.2	19.1	333.6	271.2	33.8	197.8	73.3	175	150.8	104.5
PLT35082	2024-10-30	SG16064525	H8	258740119682	8	240432	Buffer	20	NA	0409258331	0409258331	650-00033 Filled Tube, Blank	NA	NA	Filled Tube, Blank	NA	NA	EXID40000012003091	EID1348648	NA	NA	NA	NA	NA	0.916469	PASS	1	0.893629	1	NA	NA	NA	103.7	304.6	69.5	184.8	111	138.5	109.5	109.6	15.1	349.6	273.7	31.8	177	80	181.5	151.7	98.8
PLT35082	2024-10-30	SG16064525	E7	258740119681	5	OX_LC_00003	Sample	20	EDTA Plasma	a0y4W000016HHsCQAW	3536737134	a0y4W000016H72qQAC	NA	NA	NA	NA	NA	EXID40000012003094	EID1348633	NA	NA	TH1593	NA	SS-2489724	0.992145	PASS	0.841145	0.977855	0.902033	0.885	0.715	0.878	425.3	754.7	347.9	1443.7	1986.8	7142.3	3239.9	364.4	5377.4	905.6	2647.3	242.2	694.5	846.9	93285.7	1784.9	7750.9
PLT35082	2024-10-30	SG16064525	F3	258740119677	6	OX_LC_00008	Sample	20	EDTA Plasma	a0y4W000016HHrZQAW	0452531087	a0y4W000016H728QAC	NA	NA	NA	NA	NA	EXID40000012003475	EID1348621	NA	NA	TH1733	NA	SS-2489724	1.03953	PASS	1.38728	0.966403	1.22065	0.867	0.887	0.835	716	836.9	435.6	2775.8	2246.9	5203.3	3574	344.2	9225.3	793.2	2578.7	166.8	907.3	437.8	68740.5	2031.3	6902.2
PLT35083	2024-10-30	SG14464449	D6	258740119475	4	OX_LC_00010	Sample	20	EDTA Plasma	a0y4W000016HHsZQAW	3536737146	a0y4W000016H72aQAC	NA	NA	NA	NA	NA	EXID40000012003065	EID1348540	NA	NA	TH1759	NA	SS-2489724	1.00376	PASS	0.828258	1.00584	0.859304	0.938	0.828	0.922	986.7	946.6	324.2	2025.7	2095.8	6176.2	4687.8	350.4	9172.6	747.1	3453.5	269.8	1493.1	1264.9	109885	2149.4	6056.8
PLT35082	2024-10-30	SG16064525	E9	258740119683	5	OX_LC_00012	Sample	20	EDTA Plasma	a0y4W000016HHspQAG	3536737137	a0y4W000016H73HQAS	NA	NA	NA	NA	NA	EXID40000012003481	EID1348634	NA	NA	TH1793	NA	SS-2489724	0.920525	PASS	0.762468	1.07657	0.926917	0.856	0.896	0.923	358	889.2	330.5	2730.2	3453	4994.2	3026.5	319.2	4254.9	938	4697.6	294.7	863.4	1005.5	122894	1826.7	1326.7
PLT35083	2024-10-30	SG14464449	H5	258740119474	8	OX_LC_00027	Sample	20	EDTA Plasma	a0y4W000016HHrRQAW	0452531088	a0y4W000016H729QAC	NA	NA	NA	NA	NA	EXID40000012002882	EID1348519	NA	NA	TH1855	NA	SS-2489724	1.04821	PASS	0.733019	0.796996	0.68964	0.814	0.882	0.875	469.5	924.5	387	2224.7	1608	7784.4	4645.6	287.3	6573.1	831.2	3477	269	938.6	1049.2	101416	2673.9	4434.1
PLT35082	2024-10-30	SG16064525	A11	258740119617	1	OX_LC_00030	Sample	20	EDTA Plasma	a0y4W000016HHsPQAW	3536737153	a0y4W000016H72bQAC	NA	NA	NA	NA	NA	EXID40000012003095	EID1348642	NA	NA	TH1869	NA	SS-2489724	0.992678	PASS	1.10086	1.13936	1.06604	0.908	0.977	0.933	358.2	849.4	346	2695.6	1344.4	4523.3	2691.7	587.6	3124	836.3	2156.1	192.5	627.6	651.2	51766.9	1937.2	2462.9
PLT35083	2024-10-30	SG14464449	E12	258740119427	5	OX_LC_00037	Sample	20	EDTA Plasma	a0y4W000016HHskQAG	3536737141	a0y4W000016H72rQAC	NA	NA	NA	NA	NA	EXID40000012002853	EID1348538	NA	NA	TH1895	NA	SS-2489724	0.8025	PASS	0.920048	1.00147	0.893901	0.908	0.896	0.923	2946.4	833	439	2262.3	2794.4	9543.8	2966.6	287.5	2747.8	730.7	2942.5	217.6	621	705.4	106100	2138	3390.1
PLT35082	2024-10-30	SG16064525	F1	258740119675	6	OX_LC_00044	Sample	20	EDTA Plasma	a0y4W000016HHqzQAG	0452531089	a0y4W000016H72AQAS	NA	NA	NA	NA	NA	EXID40000012003478	EID1348622	NA	NA	TH1926	NA	SS-2489724	1.06186	PASS	1.09392	0.978826	1.08201	0.927	0.973	0.95	398.3	946	334.5	1853	1753	4020.2	2808.7	337.4	5760.2	812.5	2645.9	189	755.2	595.1	79372	2234.4	4871.4
PLT35083	2024-10-30	SG14464449	B10	258740119479	2	OX_LC_00050	Sample	20	EDTA Plasma	a0y4W000016HHr7QAG	0452531090	a0y4W000016H72BQAS	NA	NA	NA	NA	NA	EXID40000012002890	EID1348520	NA	NA	TH1965	NA	SS-2489724	0.878786	PASS	0.835778	0.936034	0.80891	0.888	0.905	0.852	1413.3	877.8	387.4	1710.1	2922.9	4723.9	3542.9	321.9	6250.9	831.8	3671.9	202.8	982.5	805.6	91570.8	1921	4308.7
PLT35193	2024-11-01	SG15214477	F11	258740119619	6	OX_LC_00061	Sample	20	EDTA Plasma	a0y4W000016HHszQAG	3536737147	a0y4W000016H72jQAC	NA	NA	NA	NA	NA	EXID40000012005925	EID1349028	NA	NA	TH2018	NA	SS-2489724	0.944424	PASS	0.784443	0.962463	0.844542	0.891	0.9	0.908	483.8	816.1	336.4	1696.2	1888.1	8747	2982.8	269.1	2689.1	804.5	2407.2	232	624.4	736.7	110567	2291.9	4326
PLT35082	2024-10-30	SG16064525	B6	258740119680	2	OX_LC_00067	Sample	20	EDTA Plasma	a0y4W000016HHsNQAW	3536737148	a0y4W000016H72sQAC	NA	NA	NA	NA	NA	EXID40000012003494	EID1348640	NA	NA	TH2048	NA	SS-2489724	1.01883	PASS	0.80935	0.984904	0.854213	0.912	0.977	0.941	310.8	783.7	341.6	1985.8	1822.8	4760.7	3667.6	274.3	2737.5	806	2316.3	206	687.1	861.3	67511.2	1921.5	5729.6
PLT35082	2024-10-30	SG16064525	H11	258740119617	8	OX_LC_00073	Sample	20	EDTA Plasma	a0y4W000016HHr0QAG	0452531091	a0y4W000016H72CQAS	NA	NA	NA	NA	NA	EXID40000012003654	EID1348623	NA	NA	TH2082	NA	SS-2489724	0.920385	PASS	0.854673	0.906153	0.739492	0.85	0.86	0.843	5952.6	815.7	339.9	3294.9	690.6	6549.4	3257.5	416.4	2360.4	717.5	4472	185.5	801.6	768.3	66270.4	3251.9	4818.5
PLT35193	2024-11-01	SG15214477	G9	258740119663	7	OX_LC_00081	Sample	20	EDTA Plasma	a0y4W000016HHrIQAW	0452531092	a0y4W000016H72DQAS	NA	NA	NA	NA	NA	EXID40000012005910	EID1349018	NA	NA	TH2107	NA	SS-2489724	0.938953	PASS	1.11449	1.03499	1.07669	0.936	0.982	0.955	353.2	865.5	327.3	2120.2	2341.7	5321.4	2483	971.3	8906.3	815	2676	185	749.3	640.6	74928.9	2351.6	6078.8
PLT35083	2024-10-30	SG14464449	E6	258740119475	5	OX_LC_00082	Sample	20	EDTA Plasma	a0y4W000016HHsQQAW	3536737155	a0y4W000016H72tQAC	NA	NA	NA	NA	NA	EXID40000012003058	EID1348545	NA	NA	TH2111	NA	SS-2489724	1.00021	PASS	0.845448	0.987748	0.779009	0.873	0.882	0.9	319.8	810.9	343.9	1698.3	4226.5	6047.6	3120	277.9	4613.5	736.5	2591.8	220	723.5	652.2	105698	1956.4	3051.6
PLT35083	2024-10-30	SG14464449	G2	258740119471	7	OX_LC_00083	Sample	20	EDTA Plasma	a0y4W000016HHsgQAG	3536737154	a0y4W000016H72kQAC	NA	NA	NA	NA	NA	EXID40000012002856	EID1348544	NA	NA	TH2112	NA	SS-2489724	1.10084	PASS	0.799824	0.820595	0.747579	0.927	0.968	0.932	319.6	813.5	380	2660.9	2693.2	5750.1	2886.3	280.5	4051.7	785.9	2588.7	218.5	665.9	785.2	77014.4	2143	6171.3
PLT35082	2024-10-30	SG16064525	B11	258740119617	2	OX_LC_00085	Sample	20	EDTA Plasma	a0y4W000016HHsmQAG	3536737159	a0y4W000016H72cQAC	NA	NA	NA	NA	NA	EXID40000012003500	EID1348645	NA	NA	TH2123	NA	SS-2489724	0.978206	PASS	0.987153	1.1425	1.12798	0.931	0.914	0.952	399.1	1573.7	658.5	2257.7	2529	2578.3	2339.8	664.6	3961.5	848.8	2291.9	294.9	693.6	810.1	104300	1925.7	3308
PLT35083	2024-10-30	SG14464449	H9	258740119478	8	OX_LC_00088	Sample	20	EDTA Plasma	a0y4W000016HHsaQAG	3536737161	a0y4W000016H72uQAC	NA	NA	NA	NA	NA	EXID40000012002434	EID1348547	NA	NA	TH2127	NA	SS-2489724	1.06963	PASS	0.428016	0.875683	0.542546	0.793	0.715	0.754	5656	833.7	386.3	1051.4	5275.8	4478.6	2007.9	388.5	8613.8	907	2646.5	243.2	1037	1312	148610	2150.7	1430
PLT35083	2024-10-30	SG14464449	G10	258740119479	7	OX_LC_00090	Sample	20	EDTA Plasma	a0y4W000016HHs7QAG	3536737165	a0y4W000016H72dQAC	NA	NA	NA	NA	NA	EXID40000012003059	EID1348550	NA	NA	TH2132	NA	SS-2489724	0.961198	PASS	0.8166	0.846553	0.857458	0.888	0.932	0.906	340.5	948	3407.7	1805.3	2377.5	5793.7	3984.6	274.9	2481.5	746.1	2521.3	208.3	703.6	735.3	94396.5	2121.8	3476
PLT35082	2024-10-30	SG16064525	B8	258740119682	2	OX_LC_00092	Sample	20	EDTA Plasma	a0y4W000016HHsSQAW	3536737167	a0y4W000016H72vQAC	NA	NA	NA	NA	NA	EXID40000012003468	EID1348647	NA	NA	TH2140	NA	SS-2489724	0.974685	PASS	0.866188	1.13386	0.946655	0.883	0.896	0.931	340.9	785.5	314.8	2297.1	3294.9	6775.7	3069.5	258	2278.2	780.1	2453.1	236.2	711.7	724	96864.7	1991.6	4550.7
PLT35083	2024-10-30	SG14464449	F12	258740119427	6	OX_LC_00093	Sample	20	EDTA Plasma	a0y4W000016HHsVQAW	3536737114	a0y4W000016H72wQAC	NA	NA	NA	NA	NA	EXID40000012002897	EID1348526	NA	NA	TH2144	NA	SS-2489724	0.785894	PASS	0.61776	0.721548	0.606145	0.879	0.846	0.867	336.3	800.5	404.3	1471.3	2723.4	5123.1	2273.8	295.2	2403.9	809.1	2635.6	229.3	640.1	861	98386.3	1945.6	2588.8
PLT35193	2024-11-01	SG15214477	E8	258740119662	5	OX_LC_00104	Sample	20	EDTA Plasma	a0y4W000016HHsIQAW	3536737160	a0y4W000016H72lQAC	NA	NA	NA	NA	NA	EXID40000012005924	EID1349029	NA	NA	TH2182	NA	SS-2489724	0.892037	PASS	1.06419	1.04213	1.05587	0.91	0.76	0.879	486.9	765.6	328.9	1915.2	1940.2	12544.5	4128.8	298.1	5700	795.1	3222	234.4	821.2	670.7	122662	2032.7	7330.3
PLT35082	2024-10-30	SG16064525	B7	258740119681	2	OX_LC_00128	Sample	20	EDTA Plasma	a0y4W000016HHrJQAW	0452531093	a0y4W000016H72EQAS	NA	NA	NA	NA	NA	EXID40000012003487	EID1348624	NA	NA	TH2271	NA	SS-2489724	1.00967	PASS	1.02148	1.21214	1.09514	0.886	0.946	0.909	387.4	980.6	383.5	2146.6	4641.3	2779.7	3268.4	286.6	3428.4	817.3	2187.9	189.3	671.5	799.3	73154.2	1932.6	2162.3
PLT35083	2024-10-30	SG14464449	A11	258740119426	1	OX_LC_00144	Sample	20	EDTA Plasma	a0y4W000016HHsWQAW	3536737121	a0y4W000016H72xQAC	NA	NA	NA	NA	NA	EXID40000012002440	EID1348529	NA	NA	TH2310	NA	SS-2489724	1.19984	PASS	0.737209	0.90893	0.868253	0.656	0.81	0.826	1877.1	1924.3	372.1	3538.4	1703.3	5525.7	12939.7	337.9	4157.5	2643	2954	221.8	778.9	1175.3	87961.3	2287.2	3649.8
PLT35082	2024-10-30	SG16064525	C10	258740119684	3	OX_LC_00152	Sample	20	EDTA Plasma	a0y4W000016HHsKQAW	3536737128	a0y4W000016H72yQAC	NA	NA	NA	NA	NA	EXID40000012003484	EID1348631	NA	NA	TH2334	NA	SS-2489724	0.958364	PASS	1.06643	1.0664	1.00715	0.902	0.9	0.911	345.7	876.4	310.5	3262	1104.6	8750.5	3381.9	350.1	4659.4	780.9	2932.8	189.9	739.8	553.8	102787	2394.6	4822.3
PLT35193	2024-11-01	SG15214477	B8	258740119662	2	OX_LC_00163	Sample	20	EDTA Plasma	a0y4W000016HHr8QAG	0452531094	a0y4W000016H72FQAS	NA	NA	NA	NA	NA	EXID40000012005902	EID1349019	NA	NA	TH2369	NA	SS-2489724	0.905185	PASS	0.963598	0.981537	0.884125	0.864	0.896	0.856	7720.5	778.1	448.8	2357.8	1327.6	7767	4232.3	314.2	4090.7	789.5	2997.6	176.7	635.5	561	78294.1	2481.7	9426.2
PLT35083	2024-10-30	SG14464449	H11	258740119426	8	OX_LC_00166	Sample	20	EDTA Plasma	a0y4W000016HHrtQAG	0452531095	a0y4W000016H72GQAS	NA	NA	NA	NA	NA	EXID40000012002442	EID1348521	NA	NA	TH2379	NA	SS-2489724	1.02331	PASS	0.932381	0.955463	0.910838	0.9	0.905	0.857	7111.8	771.4	375.7	2098	2079.5	5354.2	2627.6	317	2541.8	804.4	2890.7	189.6	659.5	846.1	112761	2675.9	6256.2
PLT35082	2024-10-30	SG16064525	A10	258740119684	1	OX_LC_00167	Sample	20	EDTA Plasma	a0y4W000016HHsEQAW	3536737144	a0y4W000016H73IQAS	NA	NA	NA	NA	NA	EXID40000012003497	EID1348638	NA	NA	TH2382	NA	SS-2489724	0.93727	PASS	0.697742	0.903201	0.725964	0.662	0.905	0.853	349.3	2910.6	277.3	1807.8	6772.3	8700.8	2915.7	1182.8	3418.7	918.6	2988.7	213.6	2774.4	2301.7	85861.9	1963	3320.8
PLT35083	2024-10-30	SG14464449	G6	258740119475	7	OX_LC_00168	Sample	20	EDTA Plasma	a0y4W000016HHrKQAW	0452531096	a0y4W000016H72HQAS	NA	NA	NA	NA	NA	EXID40000012002443	EID1348522	NA	NA	TH2389	NA	SS-2489724	0.959557	PASS	0.728123	0.821955	0.677745	0.869	0.932	0.86	3570.7	766.3	396.7	1327.8	2996.2	3507.4	2590.9	288.6	1447.9	765.6	2826.1	209.6	663.2	943	77526.6	2800.6	4104.5
PLT35082	2024-10-30	SG16064525	B9	258740119683	2	OX_LC_00169	Sample	20	EDTA Plasma	a0y4W000016HHsMQAW	3536737139	a0y4W000016H72ZQAS	NA	NA	NA	NA	NA	EXID40000012003473	EID1348636	NA	NA	TH2390	NA	SS-2489724	0.967012	PASS	0.909041	1.30961	0.941091	0.875	0.891	0.888	1434.8	984.4	316.4	1478.6	6013.6	4199	2127.1	302.8	11599.4	775.5	3227	252.9	1723.3	888.2	55465	2469	1587
PLT35083	2024-10-30	SG14464449	F6	258740119475	6	OX_LC_00173	Sample	20	EDTA Plasma	a0y4W000016HHr9QAG	0452531097	a0y4W000016H72IQAS	NA	NA	NA	NA	NA	EXID40000012003068	EID1348523	NA	NA	TH2405	NA	SS-2489724	1.03039	PASS	1.06775	1.05305	1.02514	0.938	0.882	0.934	1696.3	848.8	411.3	2357.2	1838.8	6048	5308.1	362.2	10945.6	712.7	3298.1	205	797.2	627.2	83832	2191.7	6408.8
PLT35083	2024-10-30	SG14464449	D12	258740119427	4	OX_LC_00179	Sample	20	EDTA Plasma	a0y4W000016HHruQAG	0452531098	a0y4W000016H72JQAS	NA	NA	NA	NA	NA	EXID40000012002870	EID1348524	NA	NA	TH2424	NA	SS-2489724	0.921294	PASS	0.803691	1.02255	0.805696	0.946	0.891	0.921	327.8	843.6	346.7	1872.4	2689.3	9381.9	4454.2	454.3	16279.8	797.3	4998	216.1	1367.2	789.9	81257.2	2190.5	3961.7
PLT35082	2024-10-30	SG16064525	D11	258740119617	4	OX_LC_00183	Sample	20	EDTA Plasma	a0y4W000016HHrAQAW	0452531099	a0y4W000016H72KQAS	NA	NA	NA	NA	NA	EXID40000012003085	EID1348625	NA	NA	TH2433	NA	SS-2489724	0.891997	PASS	0.895104	1.09276	0.914183	0.964	0.986	0.961	681.7	918	336	2230.1	1943.8	2950.6	5114.2	417.8	17665.9	814.5	4053.5	198.6	1271.8	808.2	60837.7	2484.7	2958.7
PLT35082	2024-10-30	SG16064525	F11	258740119617	6	OX_LC_00187	Sample	20	EDTA Plasma	a0y4W000016HHscQAG	3536737112	a0y4W000016H72eQAC	NA	NA	NA	NA	NA	EXID40000012003099	EID1348627	NA	NA	TH2445	NA	SS-2489724	0.866349	PASS	0.989765	1.18598	1.05704	0.906	0.941	0.933	399.9	811.8	338.6	1391.1	3186.2	3402.5	2050.2	288.3	3153.2	767.3	2355.5	2883.4	687.3	744.7	73175.8	1910.2	13773.9
PLT35193	2024-11-01	SG15214477	D8	258740119662	4	OX_LC_00188	Sample	20	EDTA Plasma	a0y4W000016HHsxQAG	3536737135	a0y4W000016H72zQAC	NA	NA	NA	NA	NA	EXID40000012005514	EID1349027	NA	NA	TH2451	NA	SS-2489724	0.975476	PASS	1.06957	1.29287	1.17368	0.899	0.9	0.924	401	983.6	320.1	2724.1	4239.8	9221.4	2995	291.3	4240.4	753.6	2580.9	205.6	660	574.4	110697	1741.5	5965.4
PLT35193	2024-11-01	SG15214477	D10	258740119664	4	OX_LC_00189	Sample	20	EDTA Plasma	a0y4W000016HHrBQAW	0452531100	a0y4W000016H72LQAS	Low Volume	NA	NA	NA	NA	EXID40000012005931	EID1349020	NA	NA	TH2452	NA	SS-2489724	0.961669	FLAG	3.64467	1.13907	14.6962	0.377	0.009	0.41	1887	1293.5	325.1	1134.6	2295.5	873.6	2521.9	470.9	242.7	1474.6	1561	142.5	805.1	369.2	1681.7	848.5	1993.6
PLT35083	2024-10-30	SG14464449	E11	258740119426	5	OX_LC_00217	Sample	20	EDTA Plasma	a0y4W000016HHslQAG	3536737142	a0y4W000016H730QAC	NA	NA	NA	NA	NA	EXID40000012003057	EID1348539	NA	NA	TH2566	NA	SS-2489724	0.778516	PASS	0.878312	0.919921	0.838818	0.94	0.95	0.966	325	846.6	350.2	1937.5	1961.5	5566.5	3098.3	342.5	8303	956.5	2855.2	253.8	867.6	749	91145.5	2359.1	6611.4
PLT35083	2024-10-30	SG14464449	G11	258740119426	7	OX_LC_00218	Sample	20	EDTA Plasma	a0y4W000016HHs5QAG	3536737149	a0y4W000016H731QAC	NA	NA	NA	NA	NA	EXID40000012003052	EID1348541	NA	NA	TH2569	NA	SS-2489724	0.812777	PASS	0.919498	1.04828	0.971561	0.918	0.955	0.95	350	928	372.5	1825.3	1750.1	10892.8	3748.3	317.5	6541.3	1768.3	3218.4	182.3	709.8	658.2	93284.8	2350.5	7086.1
PLT35083	2024-10-30	SG14464449	D10	258740119479	4	OX_LC_00228	Sample	20	EDTA Plasma	a0y4W000016HHsGQAW	3536737156	a0y4W000016H732QAC	NA	NA	NA	NA	NA	EXID40000012003069	EID1348546	NA	NA	TH2616	NA	SS-2489724	0.944184	PASS	0.92275	0.952504	0.886301	0.915	0.923	0.908	335	923.3	466.1	2888.7	5671.1	5951.2	3307.7	455.8	3030.7	772.2	2225.1	190.9	645.4	751	63761.3	2381.4	5372.6
PLT35083	2024-10-30	SG14464449	F11	258740119426	6	OX_LC_00243	Sample	20	EDTA Plasma	a0y4W000016HHshQAG	3536737162	a0y4W000016H733QAC	NA	NA	NA	NA	NA	EXID40000012002427	EID1348548	NA	NA	TH2667	NA	SS-2489724	0.816177	PASS	0.829194	1.01193	0.83385	0.917	0.923	0.943	323	862.6	402.4	1333	5013.5	6901.3	2830.9	352.2	5299	862.5	3258	225.7	854.7	1391.8	109236	2550.6	6459.3
PLT35082	2024-10-30	SG16064525	H9	258740119683	8	OX_LC_00248	Sample	20	EDTA Plasma	a0y4W000016HHs8QAG	3536737110	a0y4W000016H72MQAS	NA	NA	NA	NA	NA	EXID40000012003656	EID1348626	NA	NA	TH2692	NA	SS-2489724	0.890063	PASS	0.79292	1.00405	0.818813	0.909	0.959	0.909	537.6	986.6	366.8	1821.5	1749.2	4598.1	3296.5	283.5	5302.3	769.6	2550.1	237	1027.5	784.9	79973.2	2680.1	4585.1
PLT35193	2024-11-01	SG15214477	F8	258740119662	6	OX_LC_00258	Sample	20	EDTA Plasma	a0y4W000016HHsjQAG	3536737117	a0y4W000016H72NQAS	NA	NA	NA	NA	NA	EXID40000012005923	EID1349022	NA	NA	TH2751	NA	SS-2489724	0.914651	PASS	1.01112	1.07708	1.1042	0.905	0.882	0.935	361.4	900	311.9	2468.5	3017.2	6571.9	3623.1	304.4	2499.5	827.5	2652	210.2	821.2	771.5	85799.5	2115.5	6243.2
PLT35193	2024-11-01	SG15214477	B10	258740119664	2	OX_LC_00267	Sample	20	EDTA Plasma	a0y4W000016HHsTQAW	3536737168	a0y4W000016H734QAC	NA	NA	NA	NA	NA	EXID40000012005935	EID1349031	NA	NA	TH2796	NA	SS-2489724	0.9537	PASS	1.00567	0.991714	1.03229	0.928	0.95	0.932	360	851.6	312.1	2510.1	1606.3	7415.4	2210.7	260.1	4772.3	788.4	2380.9	196.9	691.4	725.5	93202.2	2125	6996.9
PLT35193	2024-11-01	SG15214477	C10	258740119664	3	OX_LC_00268	Sample	20	EDTA Plasma	a0y4W000016HHsAQAW	3536737124	a0y4W000016H72OQAS	NA	NA	NA	NA	NA	EXID40000012005946	EID1349025	NA	NA	TH2797	NA	SS-2489724	0.952414	PASS	0.742486	0.873646	0.721003	0.895	0.896	0.898	520.8	810.1	337.3	3050	2823.7	4815.9	3139.4	307.4	9691.5	756.8	3414.1	227.9	956.6	827.1	62807.1	2703.4	6029.1
PLT35082	2024-10-30	SG16064525	B2	258740119676	2	OX_LC_00276	Sample	20	EDTA Plasma	a0y4W000016HHsbQAG	3536737166	a0y4W000016H72mQAC	NA	NA	NA	NA	NA	EXID40000012003660	EID1348646	NA	NA	TH2822	NA	SS-2489724	1.08483	PASS	1.01818	1.03326	1.00075	0.907	0.923	0.926	674.7	1071.2	350.5	1748.7	2298.7	8260.7	3128.9	322.1	2486.5	777.4	2457.3	194.6	738.5	755.5	79861.7	2001.7	5185.9
PLT35083	2024-10-30	SG14464449	E3	258740119472	5	OX_LC_00278	Sample	20	EDTA Plasma	a0y4W000016HHstQAG	3536737115	a0y4W000016H735QAC	NA	NA	NA	NA	NA	EXID40000012002437	EID1348527	NA	NA	TH2827	NA	SS-2489724	1.11811	PASS	0.592027	0.701243	0.55652	0.867	0.67	0.764	323.2	785.5	379.3	4742	1062.1	6311.8	2458.8	379.1	17059.7	768.7	4495	284	1280.3	904.6	114652	2569.3	4440.4
PLT35083	2024-10-30	SG14464449	C5	258740119474	3	OX_LC_00286	Sample	20	EDTA Plasma	a0y4W000016HHsfQAG	3536737131	a0y4W000016H72PQAS	NA	NA	NA	NA	NA	EXID40000012002426	EID1348534	NA	NA	TH2850	NA	SS-2489724	1.07201	PASS	0.950143	0.943758	0.856306	0.926	0.937	0.919	402.8	900.8	374.3	1899.9	1110.7	5574.5	3740.5	335.7	5582	797.8	2527.3	207.2	958.5	668.1	71220.4	2467.8	7147.3
PLT35082	2024-10-30	SG16064525	G6	258740119680	7	OX_LC_00287	Sample	20	EDTA Plasma	a0y4W000016HHsYQAW	3536737138	a0y4W000016H72QQAS	NA	NA	NA	NA	NA	EXID40000012003077	EID1348635	NA	NA	TH2852	NA	SS-2489724	0.982532	PASS	0.693383	1.03447	0.833129	0.856	0.928	0.904	772.4	969.5	343.8	2306.1	3363.8	5674.9	2439.1	292	4940	767.2	2901.9	314	816.6	747.5	90197	2034.7	4191.3
PLT35082	2024-10-30	SG16064525	C8	258740119682	3	OX_LC_00291	Sample	20	EDTA Plasma	a0y4W000016HHsFQAW	3536737145	a0y4W000016H72RQAS	NA	NA	NA	NA	NA	EXID40000012003081	EID1348639	NA	NA	TH2869	NA	SS-2489724	0.961433	PASS	1.15143	1.01187	1.04913	0.946	0.982	0.967	341.3	888.1	331.3	2811.9	1938.5	5535.5	3267.5	302.6	6047.9	758.1	2650.6	185.4	761.9	689.5	68836	2056.2	7637.5
PLT35083	2024-10-30	SG14464449	C8	258740119477	3	OX_LC_00298	Sample	20	EDTA Plasma	a0y4W000016HHsOQAW	3536737152	a0y4W000016H72SQAS	NA	NA	NA	NA	NA	EXID40000012002858	EID1348543	NA	NA	TH2891	NA	SS-2489724	0.97072	PASS	0.831823	0.895169	0.798026	0.948	0.986	0.962	314.7	947.5	331.9	1430.9	1439.8	3225.4	3350	614	32457.6	755.4	12553.1	215.4	1407.3	824.4	92293.3	2583.7	4359
PLT35082	2024-10-30	SG16064525	F9	258740119683	6	OX_LC_00310	Sample	20	EDTA Plasma	a0y4W000016HHsnQAG	3536737113	a0y4W000016H72nQAC	NA	NA	NA	NA	NA	EXID40000012003477	EID1348628	NA	NA	TH2960	NA	SS-2489724	0.908454	PASS	0.86666	0.876386	0.886548	0.936	0.964	0.955	323.8	1197.5	328.1	2631.4	1724.4	6836	4671	376.7	12772.9	838.8	3908.9	189.5	851.2	1019.2	66677	2405.6	4726.1
PLT35193	2024-11-01	SG15214477	C8	258740119662	3	OX_LC_00323	Sample	20	EDTA Plasma	a0y4W000016HHsvQAG	3536737119	a0y4W000016H72fQAC	NA	NA	NA	NA	NA	EXID40000012005534	EID1349023	NA	NA	TH3026	NA	SS-2489724	0.968116	PASS	0.897334	0.931791	0.86613	0.908	0.928	0.921	332.5	817.3	373.8	1693	1627.2	5471.4	2651.5	298	6099.3	743.2	2429.6	208.1	821.1	683.6	93433.7	1967.5	7770.6
PLT35083	2024-10-30	SG14464449	D2	258740119471	4	OX_LC_00333	Sample	20	EDTA Plasma	a0y4W000016HHsoQAG	3536737122	a0y4W000016H736QAC	NA	NA	NA	NA	NA	EXID40000012002432	EID1348530	NA	NA	TH3082	NA	SS-2489724	1.24269	PASS	0.911092	0.931886	0.868401	0.922	0.819	0.921	327.6	914.2	362.9	1321.6	1767.8	8521.5	2355.1	355	5646.5	743.9	3013.8	223.1	699.9	704.3	134025	2097.1	4442.3
PLT35083	2024-10-30	SG14464449	G3	258740119472	7	OX_LC_00337	Sample	20	EDTA Plasma	a0y4W000016HHsqQAG	3536737140	a0y4W000016H72iQAC	NA	NA	NA	NA	NA	EXID40000012002892	EID1348537	NA	NA	TH3093	NA	SS-2489724	0.971808	PASS	1.17286	1.00736	1.0888	0.909	0.977	0.916	359.3	989.1	748.8	3037.8	5043	4396.1	3559.4	288.1	1939.4	774.4	2484.9	173.9	717.6	532.7	82788.9	2656.1	4293.9
PLT35082	2024-10-30	SG16064525	G10	258740119684	7	OX_LC_00343	Sample	20	EDTA Plasma	a0y4W000016HHsHQAW	3536737158	a0y4W000016H72TQAS	NA	NA	NA	NA	NA	EXID40000012003467	EID1348644	NA	NA	TH3107	NA	SS-2489724	0.929904	PASS	0.9235	0.965686	0.837508	0.897	0.914	0.906	295.6	817.9	319.7	1831.6	3577.5	4104.6	2862.9	243.4	2189.1	740.3	2339.1	219.4	739.8	864.8	50477.2	2412.3	3582.9
PLT35193	2024-11-01	SG15214477	A10	258740119664	1	OX_LC_00346	Sample	20	EDTA Plasma	a0y4W000016HHseQAG	3536737129	a0y4W000016H737QAC	NA	NA	NA	NA	NA	EXID40000012005938	EID1349026	NA	NA	TH3128	NA	SS-2489724	0.903769	PASS	0.816739	0.95825	0.828104	0.865	0.941	0.903	473.9	759.6	344.1	1732.1	2893.1	5815.5	3719.1	302.6	6357.3	862.6	2830.7	234.4	895.7	862.3	74095.2	2368.1	3571.4
PLT35193	2024-11-01	SG15214477	A11	258740119619	1	OX_LC_00348	Sample	20	EDTA Plasma	a0y4W000016HHsJQAW	3536737164	a0y4W000016H72UQAS	NA	NA	NA	NA	NA	EXID40000012005531	EID1349030	NA	NA	TH3147	NA	SS-2489724	0.853008	PASS	0.875096	1.00264	0.822214	0.902	0.846	0.921	933.3	775.3	314.9	2671.6	1254.1	4772.9	3378.8	418.3	3204.9	784.4	3168.2	192.4	639	716.4	61794.1	2323.1	3200
PLT35082	2024-10-30	SG16064525	H1	258740119675	8	OX_LC_00354	Sample	20	EDTA Plasma	a0y4W000016HHsBQAW	3536737126	a0y4W000016H72gQAC	NA	NA	NA	NA	NA	EXID40000012003469	EID1348630	NA	NA	TH3168	NA	SS-2489724	1.09264	PASS	0.95283	0.91783	0.909777	0.932	0.977	0.951	334	907.9	343.3	2032.1	1404.6	3852.5	3091	356	6444.1	746.8	4138.7	194.7	729.9	645.9	61855.7	2040.8	5983.1
PLT35083	2024-10-30	SG14464449	F9	258740119478	6	OX_LC_00374	Sample	20	EDTA Plasma	a0y4W000016HHsyQAG	3536737136	a0y4W000016H738QAC	NA	NA	NA	NA	NA	EXID40000012002864	EID1348536	NA	NA	TH3252	NA	SS-2489724	0.963296	PASS	0.912398	1.01208	0.980431	0.915	0.855	0.933	382.6	777.6	309.9	2985.4	3823.5	72187.1	3675.8	1304.4	12733.8	744.8	3697.8	197.5	1095.7	802.7	132474	1995.4	13260.9
PLT35083	2024-10-30	SG14464449	E4	258740119473	5	OX_LC_00376	Sample	20	EDTA Plasma	a0y4W000016HHsiQAG	3536737111	a0y4W000016H72VQAS	NA	NA	NA	NA	NA	EXID40000012002871	EID1348525	NA	NA	TH3268	NA	SS-2489724	1.08849	PASS	0.755074	0.925837	0.795329	0.851	0.932	0.875	338.6	971.3	422.5	2093.8	2119.2	4631.2	3791.9	248.1	1487.5	713	2218.6	209.6	812.8	736.8	79299.2	50000.6	5626.9
PLT35083	2024-10-30	SG14464449	B8	258740119477	2	OX_LC_00401	Sample	20	EDTA Plasma	a0y4W000016HHs9QAG	3536737120	a0y4W000016H72oQAC	NA	NA	NA	NA	NA	EXID40000012002425	EID1348528	NA	NA	TH3417	NA	SS-2489724	0.924515	PASS	0.529429	0.899137	0.737213	0.797	0.95	0.897	299.7	947.7	418.1	1548.8	2635.7	3447.2	3450.9	279.2	1614.7	854.2	2148.8	253.4	609.1	892	76753.6	1962.4	3594.7
PLT35082	2024-10-30	SG16064525	A8	258740119682	1	OX_LC_00417	Sample	20	EDTA Plasma	a0y4W000016HHsDQAW	3536737143	a0y4W000016H739QAC	NA	NA	NA	NA	NA	EXID40000012003455	EID1348637	NA	NA	TH3583	NA	SS-2489724	0.93331	PASS	0.863441	1.04344	0.950502	0.889	0.973	0.927	369	809.1	310.1	1603.2	2380.6	4295.6	3006.2	312.6	2611.4	826.1	2623	235.9	752.4	907.2	76438.1	2030.6	4412.9
PLT35082	2024-10-30	SG16064525	C11	258740119617	3	OX_LC_00422	Sample	20	EDTA Plasma	a0y4W000016HHsrQAG	3536737150	a0y4W000016H73AQAS	NA	NA	NA	NA	NA	EXID40000012003088	EID1348641	NA	NA	TH3622	NA	SS-2489724	0.942565	PASS	0.74091	1.12509	0.889954	0.891	0.878	0.889	395.2	804.6	395.7	1573.9	4147.5	6277.8	4143	293.3	4664.3	858.3	2749.1	215	892.6	1093.5	104735	1988.1	2567.8
PLT35082	2024-10-30	SG16064525	C9	258740119683	3	OX_LC_00436	Sample	20	EDTA Plasma	a0y4W000016HHsdQAG	3536737118	a0y4W000016H72WQAS	NA	NA	NA	NA	NA	EXID40000012003472	EID1348629	NA	NA	TH3803	NA	SS-2489724	0.958032	PASS	0.879	1.00594	0.86146	0.921	0.973	0.945	472.7	898.1	345.6	2600.3	2740.1	6711	2432.6	250.5	5422.5	758	2590.7	198.8	964.3	735.5	74900.3	3002.1	6711.6
PLT35083	2024-10-30	SG14464449	A9	258740119478	1	OX_LC_00444	Sample	20	EDTA Plasma	a0y4W000016HHsXQAW	3536737125	a0y4W000016H72XQAS	NA	NA	NA	NA	NA	EXID40000012002883	EID1348531	NA	NA	TH3887	NA	SS-2489724	0.980812	PASS	1.08639	1.09999	1.10725	0.915	0.955	0.94	380.2	822.3	491.4	2747.9	2389.3	5622	4155.8	269.4	1864.8	802.2	2416.4	206.7	678.2	620.2	80295.1	1892.7	5112.1
PLT35082	2024-10-30	SG16064525	F8	258740119682	6	OX_LC_00445	Sample	20	EDTA Plasma	a0y4W000016HHsRQAW	3536737157	a0y4W000016H73BQAS	NA	NA	NA	NA	NA	EXID40000012003664	EID1348643	NA	NA	TH3898	NA	SS-2489724	0.92308	PASS	0.866799	0.9321	0.810518	0.888	0.946	0.924	413.8	803.1	412.2	1713.2	1617.2	5891.5	2848.6	271	3404.3	745.9	2936.1	222.2	625.9	879.5	98974.6	2345.6	7579.9
PLT35082	2024-10-30	SG16064525	D3	258740119677	4	OX_LC_00446	Sample	20	EDTA Plasma	a0y4W000016HHs4QAG	3536737132	a0y4W000016H72YQAS	NA	NA	NA	NA	NA	EXID40000012003093	EID1348632	NA	NA	TH3903	NA	SS-2489724	1.09628	PASS	0.670101	0.792881	0.753651	0.855	0.932	0.88	312.8	838.8	841.3	2671.2	1466.3	2715.7	2474.2	321	7764.3	828.8	2640.3	225.2	813.6	1049.3	65784.1	2211.3	7255.7
PLT35083	2024-10-30	SG14464449	H10	258740119479	8	OX_LC_00453	Sample	20	EDTA Plasma	a0y4W000016HHs3QAG	3536737127	a0y4W000016H72pQAC	NA	NA	NA	NA	NA	EXID40000012002869	EID1348532	NA	NA	TH4075	NA	SS-2489724	1.01409	PASS	0.695486	0.694212	0.646991	0.873	0.923	0.844	282.1	775.3	364.2	2426.8	1277.1	3116.5	3921.6	253.9	1070.6	798.6	2216.4	223.1	624.5	893.8	64490.2	2253.6	5736.2
PLT35083	2024-10-30	SG14464449	G12	258740119427	7	OX_LC_00463	Sample	20	EDTA Plasma	a0y4W000016HHssQAG	3536737163	a0y4W000016H73CQAS	NA	NA	NA	NA	NA	EXID40000012002857	EID1348549	NA	NA	TH4291	NA	SS-2489724	0.811328	PASS	0.61397	0.74157	0.685904	0.69	0.846	0.821	583.2	885.6	379.8	2386.9	1205	10076.9	4738.1	697.3	1275.7	3603.5	3747	207.8	484.6	853.2	77770.8	11067.5	4034.3
PLT35083	2024-10-30	SG14464449	A7	258740119476	1	OX_LC_00464	Sample	20	EDTA Plasma	a0y4W000016HHsUQAW	3536737169	a0y4W000016H73DQAS	NA	NA	NA	NA	NA	EXID40000012002884	EID1348551	NA	NA	TH4347	NA	SS-2489724	0.977057	PASS	1.10862	1.14779	1.14129	0.869	0.928	0.904	510.6	877.7	319	1521.4	2198.9	14996.7	5537.5	301	2619.8	954.6	2741.3	183.8	643.6	591.4	67812.2	1963.3	6028.6
PLT35193	2024-11-01	SG15214477	G8	258740119662	7	OX_LC_00470	Sample	20	EDTA Plasma	a0y4W000016HHsuQAG	3536737116	a0y4W000016H73EQAS	Low Volume	NA	NA	NA	NA	EXID40000012005940	EID1349021	NA	NA	TH4377	NA	SS-2489724	0.940806	PASS	1.2072	1.26948	1.16281	0.875	0.851	0.869	473.4	818.8	393.8	1589.8	2205	10103.9	3079.3	281.6	1573.8	777.1	2751.7	167.1	720	580.9	88098.6	2220.8	5877.3
PLT35193	2024-11-01	SG15214477	A8	258740119662	1	OX_LC_00474	Sample	20	EDTA Plasma	a0y4W000016HHs2QAG	3536737123	a0y4W000016H73FQAS	NA	NA	NA	NA	NA	EXID40000012005542	EID1349024	NA	NA	TH4536	NA	SS-2489724	0.921331	PASS	0.692632	0.955627	0.948067	0.778	0.792	0.888	467.6	1121.6	743.5	1220.6	2898.8	7419.1	4233	343.8	1325.8	700.5	1825.8	237.8	576.1	450	113268	1971.4	2651.7
PLT35083	2024-10-30	SG14464449	B7	258740119476	2	OX_LC_00488	Sample	20	EDTA Plasma	a0y4W000016HHsLQAW	3536737130	a0y4W000016H73GQAS	NA	NA	NA	NA	NA	EXID40000012002898	EID1348533	NA	NA	TH4724	NA	SS-2489724	0.94428	PASS	0.872065	0.895868	0.835883	0.925	0.968	0.942	311.8	795.9	351.5	2929.1	2180.4	11768.4	3196.7	354.1	8200.6	780.1	3119.4	205.8	801.3	672.8	83716.8	1988.8	8754.7
PLT35083	2024-10-30	SG14464449	C10	258740119479	3	OX_CF_00003	Sample	20	EDTA Plasma	a0y4W000016HHqSQAW	0452530260	a0y4W000016H70NQAS	NA	NA	NA	NA	NA	EXID40000012002445	EID1348476	NA	NA	UT0041	NA	SS-2489724	0.997345	PASS	1.07292	0.994196	1.02675	0.929	0.959	0.918	392.5	1198	305.8	2457.5	949.6	5475.7	4449.1	1286.5	35565.2	810.1	8399.4	190.9	1909.5	512.9	76502.9	2151.3	10578.2
PLT35083	2024-10-30	SG14464449	B3	258740119472	2	OX_CF_00005	Sample	20	EDTA Plasma	a0y4W000016HHqLQAW	0452530261	a0y4W000016H70OQAS	NA	NA	NA	NA	NA	EXID40000012002896	EID1348477	NA	NA	UT0053	NA	SS-2489724	1.10641	PASS	0.770044	0.928247	0.846449	0.848	0.833	0.853	357.7	796.9	480.4	2298.6	812.4	7874.9	3757.8	697.5	15815.1	716.9	3632.7	194.2	1224.5	533.2	66873.1	1805.2	4706
PLT35082	2024-10-30	SG16064525	E3	258740119677	5	OX_CF_00006	Sample	20	EDTA Plasma	a0y4W000016HHpvQAG	0452530262	a0y4W000016H70PQAS	NA	NA	NA	NA	NA	EXID40000012003651	EID1348570	NA	NA	UT0057	NA	SS-2489724	0.985872	PASS	0.971471	0.993292	0.917228	0.942	0.937	0.938	951.3	867.1	396.7	1775.8	1022.6	3826.8	3057.5	973.6	55872.3	773.1	5918.8	306.2	2787.2	685.5	76870.9	2255.3	4326.3
PLT35082	2024-10-30	SG16064525	A9	258740119683	1	OX_CF_00007	Sample	20	EDTA Plasma	a0y4W000016HHqDQAW	0452530263	a0y4W000016H70QQAS	NA	NA	NA	NA	NA	EXID40000012003666	EID1348571	NA	NA	UT0089	NA	SS-2489724	0.952518	PASS	1.02668	1.09814	0.966406	0.933	0.887	0.888	8406.8	968.6	326.3	2152.2	710	2989.5	3449.7	810	46855.2	748.7	9200.5	206.8	2393.7	546.2	48273.5	2751.8	5403.6
PLT35082	2024-10-30	SG16064525	D7	258740119681	4	OX_CF_00008	Sample	20	EDTA Plasma	a0y4W000016HHqPQAW	0452526705	a0y4W000016H709QAC	NA	NA	NA	NA	NA	EXID40000012003471	EID1348563	NA	NA	UT0090	NA	SS-2489724	1.12597	PASS	1.04268	0.952447	0.873259	0.721	0.937	0.853	238.9	918.5	287.2	2420.3	1094.2	10226.7	3387.6	218.4	3518	747.6	2684.2	146	632.8	883	97496.4	2559.8	6013.6
PLT35083	2024-10-30	SG14464449	D7	258740119476	4	OX_CF_00010	Sample	20	EDTA Plasma	a0y4W000016HHpmQAG	0452530264	a0y4W000016H70RQAS	NA	NA	NA	NA	NA	EXID40000012002433	EID1348478	NA	NA	UT0099	NA	SS-2489724	0.993118	PASS	0.873633	0.959416	0.82344	0.867	0.959	0.926	314.1	814.2	1691.9	2166	2877.1	4984.2	3259.2	272.7	1268.2	708.2	2227.1	219.4	644.7	776	74992.7	2512.2	4908.6
PLT35083	2024-10-30	SG14464449	F8	258740119477	6	OX_CF_00011	Sample	20	EDTA Plasma	a0y4W000016HHqTQAW	0452530265	a0y4W000016H70SQAS	NA	NA	NA	NA	NA	EXID40000012002436	EID1348479	NA	NA	UT0152	NA	SS-2489724	0.904144	PASS	0.769886	0.855117	0.717087	0.864	0.919	0.903	322.4	939.6	343.3	1804.5	1205.8	7840.3	4476.6	269.8	1407.9	816.4	2834.6	228.3	599.9	814.5	86966.8	2473.4	4972.4
PLT35082	2024-10-30	SG16064525	A6	258740119680	1	OX_CF_00013	Sample	20	EDTA Plasma	a0y4W000016HHqCQAW	0452530259	a0y4W000016H70MQAS	NA	NA	NA	NA	NA	EXID40000012003482	EID1348569	NA	NA	UT0241	NA	SS-2489724	1.00515	PASS	0.894866	0.938409	0.850418	0.886	0.919	0.917	331.2	807.3	362.2	2813.1	1432.4	5709.2	5870.3	301.1	4110.7	709.5	2396.9	224.7	611.7	645.4	61647.3	2232.5	4310.6
PLT35193	2024-11-01	SG15214477	H10	258740119664	8	OX_CF_00014	Sample	20	EDTA Plasma	a0y4W000016HHpnQAG	0452530266	a0y4W000016H70TQAS	NA	NA	NA	NA	NA	EXID40000012005912	EID1349003	NA	NA	UT0251	NA	SS-2489724	0.954026	PASS	0.79204	0.937478	0.781619	0.942	0.959	0.926	298	907.5	333	1732.5	1165.7	3196	3640.2	745.2	32847.1	819.6	6772.7	208	2312.4	802.8	55413.7	2492.9	5063.8
PLT35083	2024-10-30	SG14464449	G5	258740119474	7	OX_CF_00015	Sample	20	EDTA Plasma	a0y4W000016HHqUQAW	0452530251	a0y4W000016H70UQAS	NA	NA	NA	NA	NA	EXID40000012002900	EID1348480	NA	NA	UT0253	NA	SS-2489724	1.00409	PASS	0.761051	1.02309	0.80364	0.913	0.869	0.917	545.9	956.8	326.3	1738.3	3191.1	3003.7	2899.3	994.2	41133.1	778.1	10231.1	236.3	3049.2	663.6	65096.8	2484.3	3564.6
PLT35082	2024-10-30	SG16064525	F4	258740119678	6	OX_CF_00019	Sample	20	EDTA Plasma	a0y4W000016HHq2QAG	0452530252	a0y4W000016H70VQAS	NA	NA	NA	NA	NA	EXID40000012003084	EID1348572	NA	NA	UT0282	NA	SS-2489724	0.998848	PASS	0.870078	0.907319	0.836791	0.866	0.937	0.909	301.7	813.4	374.7	2066.7	1188.5	4755.7	3907	311.8	4434.4	739.2	2507	237.9	659.8	1043.1	79234.6	2231.1	4753.3
PLT35082	2024-10-30	SG16064525	E10	258740119684	5	OX_CF_00021	Sample	20	EDTA Plasma	a0y4W000016HHpuQAG	0452530361	a0y4W000016H70KQAS	NA	NA	NA	NA	NA	EXID40000012003498	EID1348568	NA	NA	UT0377	NA	SS-2489724	0.927927	PASS	1.09233	1.00933	0.995969	0.917	0.95	0.935	320	815.5	335.5	2894.4	1734.4	5013.8	3242.4	280	1527	732.7	2629.4	213.5	672.5	728	59250.2	2389.4	4239.5
PLT35082	2024-10-30	SG16064525	F12	258740119618	6	OX_CF_00023	Sample	20	EDTA Plasma	a0y4W000016HHqMQAW	0452530253	a0y4W000016H70WQAS	NA	NA	NA	NA	NA	EXID40000012003493	EID1348573	NA	NA	UT0436	NA	SS-2489724	0.836722	PASS	1.0894	1.15735	1.08624	0.883	0.923	0.898	379.6	780.8	415.4	2198	733.5	4641.1	7094.4	300.2	1706.8	839.3	2285.3	211.5	533.5	691.6	118946	2226.1	7907.4
PLT35082	2024-10-30	SG16064525	G12	258740119618	7	OX_CF_00025	Sample	20	EDTA Plasma	a0y4W000016HHqRQAW	0452530356	a0y4W000016H70FQAS	NA	NA	NA	NA	NA	EXID40000012003080	EID1348565	NA	NA	UT0495	NA	SS-2489724	0.837731	PASS	1.15202	1.33583	1.26327	0.9	0.923	0.934	366.2	850.5	382.1	2015.7	2676.6	4584.8	3165	391.2	823.2	783.7	2040	1969.5	527.9	662.3	87674.3	2295.4	3594.5
PLT35083	2024-10-30	SG14464449	A2	258740119471	1	OX_CF_00027	Sample	20	EDTA Plasma	a0y4W000016HHptQAG	0452530352	a0y4W000016H70AQAS	NA	NA	NA	NA	NA	EXID40000012002448	EID1348470	NA	NA	UT0632	NA	SS-2489724	1.1139	PASS	0.917585	0.941127	0.906642	0.924	0.959	0.939	364.6	895.4	363	2071.8	1531.7	11426.1	4148.1	1072.1	49109	807.3	8245.4	204.6	2795.2	570.3	42603.2	3093.6	3213.2
PLT35082	2024-10-30	SG16064525	H3	258740119677	8	OX_CF_00031	Sample	20	EDTA Plasma	a0y4W000016HHqbQAG	0452530255	a0y4W000016H70YQAS	NA	NA	NA	NA	NA	EXID40000012003457	EID1348575	NA	NA	UT0876	NA	SS-2489724	1.02721	PASS	0.8475	1.05358	0.869092	0.836	0.937	0.883	347.1	878.6	379.9	1954.2	760.5	4372.3	3804.5	340.9	2806.7	816	2481.6	209.6	1174.3	725.9	75480.3	2141.3	4601.8
PLT35082	2024-10-30	SG16064525	A4	258740119678	1	OX_CF_00032	Sample	20	EDTA Plasma	a0y4W000016HHq3QAG	0452530256	a0y4W000016H70ZQAS	NA	NA	NA	NA	NA	EXID40000012003657	EID1348576	NA	NA	UT0965	NA	SS-2489724	1.02213	PASS	1.04256	1.10379	1.01942	0.905	0.914	0.906	337.3	833.7	379.6	2287.8	1356.3	4112.1	3189.4	295.6	3605.5	786.8	2227.6	194.4	662	852.8	55465.9	2204.7	5118.8
PLT35082	2024-10-30	SG16064525	H4	258740119678	8	OX_CF_00033	Sample	20	EDTA Plasma	a0y4W000016HHqEQAW	0452530257	a0y4W000016H70aQAC	NA	NA	NA	NA	NA	EXID40000012003665	EID1348577	NA	NA	UT1013	NA	SS-2489724	1.09215	PASS	0.811318	0.899118	0.81174	0.897	0.769	0.896	383	870.2	332.4	1489.9	2481.8	5817.6	4077.8	329.1	5156.5	730	3867.1	251.5	778.7	770.3	60366.6	1893.4	6675.3
PLT35083	2024-10-30	SG14464449	D1	258740119470	4	OX_CF_00034	Sample	20	EDTA Plasma	a0y4W000016HHqNQAW	0452530258	a0y4W000016H70bQAC	NA	NA	NA	NA	NA	EXID40000012002885	EID1348481	NA	NA	UT1054	NA	SS-2489724	1.44415	PASS	1.25035	1.10439	1.14465	0.76	0.828	0.834	416.5	870.6	487.9	2737.5	1000.4	3963.6	3271.6	1789.1	56876.6	854.9	12444.6	162.4	3965.1	616.4	72992	3936.3	3558
PLT35082	2024-10-30	SG16064525	G4	258740119678	7	OX_CF_00035	Sample	20	EDTA Plasma	a0y4W000016HHpoQAG	0452530243	a0y4W000016H70cQAC	NA	NA	NA	NA	NA	EXID40000012003483	EID1348578	NA	NA	UT1122	NA	SS-2489724	1.05239	PASS	0.876211	1.09353	0.907102	0.887	0.959	0.917	294	861.8	342.4	1662.2	2157.5	3861.6	3339.5	294.3	7395.8	865.3	2847.2	215.7	757.2	1144.5	58687.1	2380.4	4129.1
PLT35082	2024-10-30	SG16064525	C3	258740119677	3	OX_CF_00036	Sample	20	EDTA Plasma	a0y4W000016HHrTQAW	0452531120	a0y4W000016H71FQAS	NA	NA	NA	NA	NA	EXID40000012003072	EID1348597	NA	NA	UT1168	NA	SS-2489724	1.08762	PASS	0.781621	0.837975	0.756008	0.884	0.964	0.923	342.2	818.8	373.2	1651.8	1551.8	6774.2	5494.1	2084.3	4222.6	993.7	2346.4	219.9	742.3	915.3	86166	2010.3	6348.8
PLT35082	2024-10-30	SG16064525	C12	258740119618	3	OX_CF_00038	Sample	20	EDTA Plasma	a0y4W000016HHqcQAG	0452530244	a0y4W000016H70dQAC	NA	NA	NA	NA	NA	EXID40000012003653	EID1348579	NA	NA	UT1185	NA	SS-2489724	0.91692	PASS	0.963859	1.11725	0.957673	0.909	0.928	0.94	344.7	884.3	326.1	2219.7	1665.9	5920.6	4192.6	281.5	1772.1	854.2	2360.5	186.7	550.1	738.4	71815.5	2266.6	7133
PLT35083	2024-10-30	SG14464449	F1	258740119470	6	OX_CF_00040	Sample	20	EDTA Plasma	a0y4W000016HHqmQAG	0452530245	a0y4W000016H70eQAC	NA	NA	NA	NA	NA	EXID40000012003067	EID1348482	NA	NA	UT1252	NA	SS-2489724	1.15468	PASS	0.663161	0.874873	0.775217	0.79	0.91	0.854	383.9	1039.4	1357.5	1680	2018.4	2530.6	3086	889.1	23451.3	778	6401.6	212	1670.3	1024.9	65814.4	1541.7	5304.8
PLT35082	2024-10-30	SG16064525	H2	258740119676	8	OX_CF_00041	Sample	20	EDTA Plasma	a0y4W000016HHpxQAG	0452530248	a0y4W000016H70hQAC	NA	NA	NA	NA	NA	EXID40000012003083	EID1348581	NA	NA	UT1259	NA	SS-2489724	1.00977	PASS	0.677596	0.927843	0.725338	0.904	0.91	0.885	973.6	951.9	416.7	1881.8	1076.5	3411.5	5530.6	1374.5	49678.9	751.6	13282.2	274.8	3339.1	868.1	87943	2688.7	4746.7
PLT35083	2024-10-30	SG14464449	H2	258740119471	8	OX_CF_00042	Sample	20	EDTA Plasma	a0y4W000016HHqVQAW	0452530246	a0y4W000016H70fQAC	NA	NA	NA	NA	NA	EXID40000012003070	EID1348483	NA	NA	UT1272	NA	SS-2489724	1.069	PASS	0.954312	0.87786	0.870897	0.916	0.941	0.931	311.3	890.7	337.2	2087.5	952.8	3254	3162.7	864	60606.9	727.2	6005.6	197.4	2897.3	574.9	72875.1	3166.4	3447.8
PLT35083	2024-10-30	SG14464449	D5	258740119474	4	OX_CF_00048	Sample	20	EDTA Plasma	a0y4W000016HHqWQAW	0452530249	a0y4W000016H70iQAC	NA	NA	NA	NA	NA	EXID40000012002863	EID1348484	NA	NA	UT1468	NA	SS-2489724	1.06365	PASS	0.746226	0.920238	0.724021	0.926	0.941	0.93	392	857	1020.2	1703.7	1824	3415.4	3718.8	336.5	9024.3	788.5	2907.4	225.4	910.2	914.3	84339.6	2161.1	2878.4
PLT35193	2024-11-01	SG15214477	H7	258740119661	8	OX_CF_00049	Sample	20	EDTA Plasma	a0y4W000016HHqQQAW	0452530353	a0y4W000016H70BQAS	NA	NA	NA	NA	NA	EXID40000012005932	EID1349002	NA	NA	UT1482	NA	SS-2489724	0.85569	PASS	0.908189	0.998404	0.827439	0.92	0.959	0.945	279.7	1021	335.4	2098.4	1494.8	6861.7	3931.7	1097.8	52601.1	741.9	11645.5	211.3	2523.4	665.8	63373.1	2824.7	4684.9
PLT35083	2024-10-30	SG14464449	H8	258740119477	8	OX_CF_00050	Sample	20	EDTA Plasma	a0y4W000016HHqoQAG	0452530250	a0y4W000016H70jQAC	NA	NA	NA	NA	NA	EXID40000012002894	EID1348485	NA	NA	UT1483	NA	SS-2489724	0.968718	PASS	1.03773	0.895004	0.912962	0.919	0.919	0.93	346.5	907.2	466	2038.9	1302.9	2969.2	3314.6	751.7	6047.1	751.4	2868.7	192.1	698.1	651.9	71233.9	1940.1	7861.5
PLT35082	2024-10-30	SG16064525	B4	258740119678	2	OX_CF_00051	Sample	20	EDTA Plasma	a0y4W000016HHqnQAG	0452530247	a0y4W000016H70gQAC	NA	NA	NA	NA	NA	EXID40000012003496	EID1348580	NA	NA	UT1577	NA	SS-2489724	1.03513	PASS	1.55303	1.45604	1.36468	0.895	0.878	0.938	389.8	861.5	369.5	1650.9	658.5	5659.4	3884.2	592.5	22519.6	818.3	3865.5	223.9	1542.3	469.3	80075.9	1999.2	6298.8
PLT35082	2024-10-30	SG16064525	H10	258740119684	8	OX_CF_00054	Sample	20	EDTA Plasma	a0y4W000016HHqdQAG	0452530235	a0y4W000016H70kQAC	NA	NA	NA	NA	NA	EXID40000012003659	EID1348582	NA	NA	UT1639	NA	SS-2489724	0.953556	PASS	0.756031	1.11119	0.943529	0.808	0.946	0.873	341	1386.9	311.7	1732.4	1869.2	2444.9	2888.3	1328.3	85763.7	731	17366.8	190.5	8565.4	614.4	30839	3297	3666.5
PLT35082	2024-10-30	SG16064525	C5	258740119679	3	OX_CF_00058	Sample	20	EDTA Plasma	a0y4W000016HHqXQAW	0452530236	a0y4W000016H70lQAC	NA	NA	NA	NA	NA	EXID40000012003452	EID1348583	NA	NA	UT1800	NA	SS-2489724	1.10881	PASS	0.754495	0.922835	0.701141	0.889	0.914	0.914	2484.5	754.1	330.5	2047.5	2439.4	5467.8	7275.3	325.8	4487.1	774.6	4617.4	246	692.7	917.5	80455.4	2173.5	5555
PLT35193	2024-11-01	SG15214477	B11	258740119619	2	OX_CF_00059	Sample	20	EDTA Plasma	a0y4W000016HHqFQAW	0452530237	a0y4W000016H70mQAC	NA	NA	NA	NA	NA	EXID40000012005906	EID1349004	NA	NA	UT1845	NA	SS-2489724	0.921547	PASS	1.077	1.04582	1.02112	0.902	0.878	0.896	339.3	864.8	345.5	2941.8	1327.2	9035.3	3030.2	359.8	5189.1	787.4	3085.3	186.9	679.5	526.1	67197.7	2393.4	4391.7
PLT35083	2024-10-30	SG14464449	H1	258740119470	8	OX_CF_00060	Sample	20	EDTA Plasma	a0y4W000016HHpsQAG	0452526703	a0y4W000016H707QAC	NA	NA	NA	NA	NA	EXID40000012003054	EID1348468	NA	NA	UT1885	NA	SS-2489724	1.04079	PASS	0.824642	0.736747	0.73452	0.923	0.919	0.924	310.3	833.1	366.5	2244.1	2387.5	4337	2748.4	302	1652.7	754	2423.4	252.9	585.4	788	83270.7	2289.7	4427.5
PLT35083	2024-10-30	SG14464449	A5	258740119474	1	OX_CF_00062	Sample	20	EDTA Plasma	a0y4W000016HHq1QAG	0452530362	a0y4W000016H70LQAS	NA	NA	NA	NA	NA	EXID40000012002878	EID1348475	NA	NA	UT1949	NA	SS-2489724	1.03426	PASS	0.799446	0.930378	0.80708	0.938	0.955	0.919	355	766.8	378.1	2028.3	4019.6	3858.5	3038.2	599.2	22131.2	771.5	5642.7	219	2219.5	688.2	81353.4	1953.4	6980.8
PLT35082	2024-10-30	SG16064525	B1	258740119675	2	OX_CF_00063	Sample	20	EDTA Plasma	a0y4W000016HHqeQAG	0452530238	a0y4W000016H70nQAC	NA	NA	NA	NA	NA	EXID40000012003071	EID1348584	NA	NA	UT1987	NA	SS-2489724	1.15442	PASS	0.861247	0.950409	0.842567	0.905	0.896	0.899	629.1	999.7	306.1	2156.4	970	9906.6	4172.4	1065.8	53109.8	760.5	11992.5	289.7	3072.2	633.7	85526.1	2060.9	7919.3
PLT35083	2024-10-30	SG14464449	A10	258740119479	1	OX_CF_00069	Sample	20	EDTA Plasma	a0y4W000016HHqAQAW	0452531046	a0y4W000016H706QAC	NA	NA	NA	NA	NA	EXID40000012002441	EID1348467	NA	NA	UT2175	NA	SS-2489724	0.891013	PASS	0.919969	0.989386	0.906208	0.897	0.928	0.923	403.1	1073.1	385.3	2035.2	1245.7	6946.8	3032.4	299.2	4031.9	761.5	2662.6	191.9	714.3	638.6	86267.2	2196.7	7210.9
PLT35082	2024-10-30	SG16064525	C7	258740119681	3	OX_CF_00070	Sample	20	EDTA Plasma	a0y4W000016HHqpQAG	0452530239	a0y4W000016H70oQAC	NA	NA	NA	NA	NA	EXID40000012003456	EID1348585	NA	NA	UT2387	NA	SS-2489724	1.04924	PASS	0.911379	1.07554	0.926481	0.92	0.959	0.937	344.2	793.1	339.2	2341.8	2002.8	3804.1	2277.9	450.9	12759.3	758.1	3563.3	212.7	1056.7	805.5	84025.4	1915.7	5192.9
PLT35082	2024-10-30	SG16064525	F7	258740119681	6	OX_CF_00071	Sample	20	EDTA Plasma	a0y4W000016HHqqQAG	0452530240	a0y4W000016H70pQAC	NA	NA	NA	NA	NA	EXID40000012003076	EID1348586	NA	NA	UT2480	NA	SS-2489724	0.980806	PASS	0.841402	1.10043	0.843146	0.823	0.937	0.841	302.3	951.5	381	1421.6	1535.4	3359	4186.6	3162.6	95391.5	721.4	19072.3	280.3	8761.2	649.1	27467.8	3215.2	3725.1
PLT35082	2024-10-30	SG16064525	A5	258740119679	1	OX_CF_00072	Sample	20	EDTA Plasma	a0y4W000016HHqGQAW	0452530241	a0y4W000016H70qQAC	NA	NA	NA	NA	NA	EXID40000012003089	EID1348587	NA	NA	UT2495	NA	SS-2489724	0.999533	PASS	0.807303	0.96833	0.870194	0.874	0.955	0.881	377.2	1094.6	335.4	2075.8	1318.6	3063.5	3075.2	1550.1	70311.8	870.5	13943.7	213.8	5283.2	800	73891.2	2522.3	3261.7
PLT35082	2024-10-30	SG16064525	H7	258740119681	8	OX_CF_00073	Sample	20	EDTA Plasma	a0y4W000016HHqHQAW	0452530242	a0y4W000016H70rQAC	NA	NA	NA	NA	NA	EXID40000012003462	EID1348588	NA	NA	UT2500	NA	SS-2489724	0.971576	PASS	0.862691	0.904599	0.848199	0.914	0.959	0.937	569.2	856.3	378.5	2104.2	1441.6	4886.7	4247	316.7	3942	2951.1	2501.3	257.4	657.2	805.1	88045.2	2429.3	3957.4
PLT35082	2024-10-30	SG16064525	E1	258740119675	5	OX_CF_00074	Sample	20	EDTA Plasma	a0y4W000016HHqYQAW	0452531047	a0y4W000016H70sQAC	NA	NA	NA	NA	NA	EXID40000012003658	EID1348589	NA	NA	UT2522	NA	SS-2489724	0.942665	PASS	0.963813	1.03365	0.939015	0.884	0.968	0.93	378.1	998.1	426.9	1944.3	1766.9	4849.8	3033.3	274.7	1364.4	804.4	2237.7	208.6	531.4	719.1	97082.7	15416.5	8956.8
PLT35082	2024-10-30	SG16064525	A12	258740119618	1	OX_CF_00075	Sample	20	EDTA Plasma	a0y4W000016HHpwQAG	0452530254	a0y4W000016H70XQAS	NA	NA	NA	NA	NA	EXID40000012003097	EID1348574	NA	NA	UT2546	NA	SS-2489724	0.950036	PASS	1.15002	1.3848	1.27814	0.861	0.914	0.926	394.6	842.4	343.5	2063.1	535.9	3951.4	3477.6	535.3	17726.4	4919.7	5192.7	161.9	1616.6	801.2	74194	1811.2	9888.3
PLT35083	2024-10-30	SG14464449	A12	258740119427	1	OX_CF_00077	Sample	20	EDTA Plasma	a0y4W000016HHqOQAW	0452526706	a0y4W000016H708QAC	NA	NA	NA	NA	NA	EXID40000012002875	EID1348469	NA	NA	UT2656	NA	SS-2489724	1.03046	PASS	1.33176	1.36549	1.34943	0.765	0.914	0.859	1213.7	885	433.6	1831.2	1354.2	5380	3508.7	308.8	2060.8	921	2196.2	171	581.8	805.8	101570	1944.4	5210.9
PLT35083	2024-10-30	SG14464449	E1	258740119470	5	OX_CF_00078	Sample	20	EDTA Plasma	a0y4W000016HHqrQAG	0452531104	a0y4W000016H70tQAC	NA	NA	NA	NA	NA	EXID40000012002859	EID1348486	NA	NA	UT2689	NA	SS-2489724	1.08459	PASS	0.939824	0.886089	0.866153	0.957	0.959	0.957	342.2	831.4	319.6	2008	962.8	3987.8	3418	868.3	35385.6	908.2	8177.6	221.5	2373.8	1037.3	72856.8	2643	4953.2
PLT35082	2024-10-30	SG16064525	D6	258740119680	4	OX_CF_00079	Sample	20	EDTA Plasma	a0y4W000016HHqkQAG	0452530358	a0y4W000016H70HQAS	NA	NA	NA	NA	NA	EXID40000012003652	EID1348566	NA	NA	UT2879	NA	SS-2489724	0.961674	PASS	1.01801	1.05239	0.968108	0.933	0.964	0.95	316.4	826.2	342.5	2474.3	1031.5	6266.8	4303.4	384.2	11469	779.7	3249.4	213.5	893.6	753	92078	2186.5	3336.1
PLT35082	2024-10-30	SG16064525	A1	258740119675	1	OX_CF_00080	Sample	20	EDTA Plasma	a0y4W000016HHpyQAG	0452531105	a0y4W000016H70uQAC	NA	NA	NA	NA	NA	EXID40000012003087	EID1348590	NA	NA	UT2882	NA	SS-2489724	1.23284	PASS	1.23113	0.884116	0.981087	0.636	0.86	0.76	383.5	780.5	204.7	2597.2	1964.3	4034.9	3137.7	958.4	69831.6	850.8	9713.5	187.6	4580	591.6	40533.7	3165.7	4999.7
PLT35193	2024-11-01	SG15214477	E9	258740119663	5	OX_CF_00081	Sample	20	EDTA Plasma	a0y4W000016HHppQAG	0452531106	a0y4W000016H70vQAC	NA	NA	NA	NA	NA	EXID40000012005518	EID1349005	NA	NA	UT2931	NA	SS-2489724	0.900919	PASS	0.905159	0.901909	0.871052	0.898	0.986	0.937	321	1079.8	332.4	1965.3	1739.6	4082.1	3310.1	263.6	1151.1	821.6	2674.4	215.2	546.3	806.9	61733.7	2070.8	4123.4
PLT35082	2024-10-30	SG16064525	D10	258740119684	4	OX_CF_00082	Sample	20	EDTA Plasma	a0y4W000016HHqBQAW	0452530359	a0y4W000016H70IQAS	NA	NA	NA	NA	NA	EXID40000012003460	EID1348567	NA	NA	UT2960	NA	SS-2489724	0.937707	PASS	0.701777	0.992312	0.780837	0.906	0.896	0.9	510.2	803.7	404.6	1756.5	1353.4	2495.5	3003.4	1013.4	35933.7	800.9	7840	216.1	2777.1	899.5	64833.3	3125.2	4541.8
PLT35082	2024-10-30	SG16064525	D9	258740119683	4	OX_CF_00083	Sample	20	EDTA Plasma	a0y4W000016HHqsQAG	0452531107	a0y4W000016H70wQAC	NA	NA	NA	NA	NA	EXID40000012003491	EID1348591	NA	NA	UT2964	NA	SS-2489724	0.928869	PASS	1.02072	1.18625	0.986102	0.95	0.964	0.932	393.4	960.1	322	1970.6	2154.8	4993.4	3919.4	377	12388.2	735.9	3632.9	196.8	1221.9	703.2	68926.7	3120.6	4555.1
PLT35083	2024-10-30	SG14464449	G4	258740119473	7	OX_CF_00087	Sample	20	EDTA Plasma	a0y4W000016HHq4QAG	0452531108	a0y4W000016H70xQAC	NA	NA	NA	NA	NA	EXID40000012002851	EID1348487	NA	NA	UT3207	NA	SS-2489724	1.02816	PASS	0.946602	0.907426	0.851524	0.938	0.937	0.944	609.6	834.2	337.1	2029.5	1095.1	3823.5	3860	848.3	42761.1	741.1	6311	221.4	2433.4	786.2	75773.5	2203.2	5498.7
PLT35082	2024-10-30	SG16064525	F5	258740119679	6	OX_CF_00088	Sample	20	EDTA Plasma	a0y4W000016HHq5QAG	0452531109	a0y4W000016H70yQAC	NA	NA	NA	NA	NA	EXID40000012003092	EID1348592	NA	NA	UT3208	NA	SS-2489724	1.00462	PASS	1.13442	1.10794	1.07596	0.922	0.977	0.949	763.9	841.5	339.2	2259	1119.4	3552	3240.7	416	14954	763.7	3411.3	182.4	942.3	575.6	61980.6	2649.2	4060
PLT35083	2024-10-30	SG14464449	D9	258740119478	4	OX_CF_00089	Sample	20	EDTA Plasma	a0y4W000016HHpqQAG	0452530234	a0y4W000016H70zQAC	NA	NA	NA	NA	NA	EXID40000012002865	EID1348488	NA	NA	UT3280	NA	SS-2489724	0.978424	PASS	0.919711	0.999541	0.916158	0.944	0.914	0.922	464.5	862.8	335.3	1792.3	1092.8	4406.7	4358.4	873.4	17950.4	756.9	4514.3	216.4	1164.4	644.4	61706.5	2091.8	6137.4
PLT35083	2024-10-30	SG14464449	B2	258740119471	2	OX_CF_00090	Sample	20	EDTA Plasma	a0y4W000016HHqjQAG	0452530357	a0y4W000016H70GQAS	NA	NA	NA	NA	NA	EXID40000012002876	EID1348473	NA	NA	UT3403	NA	SS-2489724	1.14285	PASS	0.909108	0.868358	0.823509	0.866	0.923	0.82	315.1	723.4	345.6	1649	648	5600.7	3118.9	266.5	2390.2	794.8	2597.2	229.4	658.9	871.7	73440.5	2362.8	6030.4
PLT35083	2024-10-30	SG14464449	B12	258740119427	2	OX_CF_00092	Sample	20	EDTA Plasma	a0y4W000016HHqIQAW	0452531031	a0y4W000016H710QAC	NA	NA	NA	NA	NA	EXID40000012002891	EID1348489	NA	NA	UT3448	NA	SS-2489724	0.85954	PASS	1.07491	1.14436	1.12746	0.909	0.95	0.93	394.6	838.4	341.8	1863.9	750.7	2590.2	3689.5	728.6	23675.4	818.1	5919.1	169.5	1835.5	542.4	63091.7	1911	4108.5
PLT35082	2024-10-30	SG16064525	G1	258740119675	7	OX_CF_00094	Sample	20	EDTA Plasma	a0y4W000016HHpzQAG	0452531032	a0y4W000016H711QAC	NA	NA	NA	NA	NA	EXID40000012003461	EID1348593	NA	NA	UT3536	NA	SS-2489724	0.97893	PASS	1.01588	1.05637	0.982953	0.882	0.801	0.918	334.4	768.8	326	1948.9	1360.6	4026.2	3087	321	1330.7	1756.3	2152.9	196.3	548.3	702.5	76747.6	2040.6	4549.4
PLT35082	2024-10-30	SG16064525	G5	258740119679	7	OX_CF_00096	Sample	20	EDTA Plasma	a0y4W000016HHqfQAG	0452531033	a0y4W000016H712QAC	NA	NA	NA	NA	NA	EXID40000012003663	EID1348594	NA	NA	UT3593	NA	SS-2489724	1.01817	PASS	0.67506	1.03343	0.882323	0.874	0.928	0.895	678.5	1064.6	313.1	1730.5	1036.4	2789.1	3745	507	26154.2	903.8	5076.4	268.5	1723.4	653.7	67751.8	2022.8	2766.7
PLT35082	2024-10-30	SG16064525	D5	258740119679	4	OX_CF_00098	Sample	20	EDTA Plasma	a0y4W000016HHq6QAG	0452531034	a0y4W000016H713QAC	NA	NA	NA	NA	NA	EXID40000012003454	EID1348595	NA	NA	UT3609	NA	SS-2489724	1.07874	PASS	0.797722	0.964437	0.784742	0.911	0.91	0.891	401.1	754.8	370.1	2296.9	594.8	6357.3	2630.5	462.6	19256.8	796.3	4636.3	196.1	1226.2	744.4	57016	2001.6	7244.8
PLT35083	2024-10-30	SG14464449	H7	258740119476	8	OX_CF_00099	Sample	20	EDTA Plasma	a0y4W000016HHqKQAW	0452531045	a0y4W000016H70DQAS	NA	NA	NA	NA	NA	EXID40000012002880	EID1348472	NA	NA	UT3745	NA	SS-2489724	0.99622	PASS	0.93313	0.959996	0.909384	0.892	0.919	0.903	307.8	795.4	338.2	1726.7	1418.2	3585.9	2430.4	311.5	3595.4	817.2	3106.1	208.7	643.5	713.9	66096	2216.2	5056.1
PLT35082	2024-10-30	SG16064525	H12	258740119618	8	OX_CF_00103	Sample	20	EDTA Plasma	a0y4W000016HHqJQAW	0452531035	a0y4W000016H714QAC	NA	NA	NA	NA	NA	EXID40000012003458	EID1348596	NA	NA	UT4135	NA	SS-2489724	0.94807	PASS	1.03566	1.23366	1.10657	0.864	0.941	0.897	384	974	336.4	1777.1	1152.5	3476.1	2853.4	1047.6	33701.7	801.7	7715.6	162.5	2471.7	512.5	62672	2206.1	4805.6
PLT35083	2024-10-30	SG14464449	C2	258740119471	3	OX_CF_00104	Sample	20	EDTA Plasma	a0y4W000016HHq7QAG	0452531036	a0y4W000016H715QAC	NA	NA	NA	NA	NA	EXID40000012002874	EID1348490	NA	NA	UT4138	NA	SS-2489724	1.14143	PASS	0.931902	0.956915	0.891226	0.942	0.937	0.923	340.9	883.4	376.7	5232	649.5	5784.7	3992	825.9	25535.3	790.1	5262.9	201.1	1327.9	655.8	67694.4	2147.5	5135.2
PLT35083	2024-10-30	SG14464449	F10	258740119479	6	OX_CF_00105	Sample	20	EDTA Plasma	a0y4W000016HHprQAG	0452531037	a0y4W000016H716QAC	NA	NA	NA	NA	NA	EXID40000012002862	EID1348491	NA	NA	UT4139	NA	SS-2489724	0.953698	PASS	0.89581	0.994794	0.955731	0.93	0.91	0.926	350.5	820.6	393.1	1669.7	898.3	5213.9	3267.4	537.6	23809.3	763	4839.1	183.9	1496.8	642.4	79677.4	3311.7	6503.1
PLT35193	2024-11-01	SG15214477	G7	258740119661	7	OX_CF_00106	Sample	20	EDTA Plasma	a0y4W000016HHqgQAG	0452531038	a0y4W000016H717QAC	NA	NA	NA	NA	NA	EXID40000012005904	EID1349006	NA	NA	UT4140	NA	SS-2489724	0.847918	PASS	0.835225	0.994973	0.798432	0.926	0.941	0.907	707.9	997.5	366.2	1769.1	1249.8	3145.6	3191.7	1198.4	53589.4	751.6	9796.1	249.3	2994.1	742.3	73618.4	2257.5	2052.9
PLT35083	2024-10-30	SG14464449	G7	258740119476	7	OX_CF_00107	Sample	20	EDTA Plasma	a0y4W000016HHqZQAW	0452531039	a0y4W000016H718QAC	NA	NA	NA	NA	NA	EXID40000012002429	EID1348492	NA	NA	UT4142	NA	SS-2489724	0.990156	PASS	0.774422	1.05207	0.948488	0.899	0.891	0.895	359.6	788.2	352.7	2066.1	748.9	2679.6	3328.1	676.9	39035	799.6	7323	232.2	2039.5	624.7	79917.5	2289.4	3147.5
PLT35083	2024-10-30	SG14464449	C6	258740119475	3	OX_CF_00110	Sample	20	EDTA Plasma	a0y4W000016HHqhQAG	0452531040	a0y4W000016H719QAC	NA	NA	NA	NA	NA	EXID40000012002447	EID1348493	NA	NA	UT4146	NA	SS-2489724	1.05217	PASS	1.00006	1.02299	0.980928	0.919	0.9	0.904	403.1	846.9	387.5	1990.8	884.9	4500.4	3400.3	941.3	28822.4	776.8	7881.5	213.1	2236.3	615.1	57586.4	2697.2	2810.9
PLT35083	2024-10-30	SG14464449	H6	258740119475	8	OX_CF_00112	Sample	20	EDTA Plasma	a0y4W000016HHq8QAG	0452531041	a0y4W000016H71AQAS	NA	NA	NA	NA	NA	EXID40000012002881	EID1348494	NA	NA	UT4155	NA	SS-2489724	0.991719	PASS	0.819095	0.866707	0.777872	0.951	0.923	0.927	950.9	994.4	370.7	1865.9	1132.2	2587.2	3297.1	977.4	36069.8	733.5	8346.9	212.2	2172.6	706.9	36076.5	2644	4027.8
PLT35083	2024-10-30	SG14464449	E9	258740119478	5	OX_CF_00115	Sample	20	EDTA Plasma	a0y4W000016HHqtQAG	0452531042	a0y4W000016H71BQAS	NA	NA	NA	NA	NA	EXID40000012002450	EID1348495	NA	NA	UT4292	NA	SS-2489724	0.92057	PASS	0.848514	1.00638	0.889589	0.913	0.923	0.923	338	799.5	368.3	2039.7	4512.9	4419.9	2792.1	270	2358.3	783.2	2246.4	191.5	712.8	664.5	49514.3	2404.8	3254.2
PLT35083	2024-10-30	SG14464449	E8	258740119477	5	OX_CF_00116	Sample	20	EDTA Plasma	a0y4W000016HHq9QAG	0452531043	a0y4W000016H71CQAS	NA	NA	NA	NA	NA	EXID40000012002435	EID1348496	NA	NA	UT4394	NA	SS-2489724	0.945661	PASS	0.813954	0.918302	0.760555	0.95	0.914	0.903	373.2	834.5	383.4	2209.6	1547.7	2642	4253.9	672.7	24041.5	737.8	5852.7	222	1489.1	808.3	72999.7	2382.4	5645
PLT35193	2024-11-01	SG15214477	G11	258740119619	7	OX_CF_00117	Sample	20	EDTA Plasma	a0y4W000016HHqaQAG	0452531044	a0y4W000016H71DQAS	NA	NA	NA	NA	NA	EXID40000012005934	EID1349007	NA	NA	UT4595	NA	SS-2489724	0.939533	PASS	1.07014	1.01036	1.09716	0.905	0.941	0.918	318.2	1009.1	476.4	2206.1	2145.4	3628.2	4636.3	335.2	3961.7	768.8	2959.4	189.7	888.6	654.3	54677	2111.8	6549.7
PLT35083	2024-10-30	SG14464449	B4	258740119473	2	OX_CF_00118	Sample	20	EDTA Plasma	a0y4W000016HHrSQAW	0452531119	a0y4W000016H71EQAS	NA	NA	NA	NA	NA	EXID40000012002867	EID1348497	NA	NA	UT4623	NA	SS-2489724	1.05308	PASS	0.874275	0.974786	0.89559	0.893	0.977	0.924	324.4	908.4	428.4	2187.6	1791.8	4312.4	2720.4	276	2168.3	769.9	2257.7	218.8	750.1	790.1	69187.5	2128.2	10338.2
PLT35083	2024-10-30	SG14464449	F5	258740119474	6	OX_CF_00120	Sample	20	EDTA Plasma	a0y4W000016HHqlQAG	0452530360	a0y4W000016H70JQAS	NA	NA	NA	NA	NA	EXID40000012002866	EID1348474	NA	NA	UT4659	NA	SS-2489724	1.00925	PASS	1.06245	0.996992	1.07191	0.897	0.955	0.924	338.8	924.2	337.5	2016	1747.3	5484.2	2973.2	329.5	3269.4	763.9	2703.7	212.5	651.9	629.8	81924.2	2374.5	6877.9
PLT35082	2024-10-30	SG16064525	F10	258740119684	6	OX_CF_00121	Sample	20	EDTA Plasma	a0y4W000016HHq0QAG	0452530355	a0y4W000016H70EQAS	NA	NA	NA	NA	NA	EXID40000012003489	EID1348564	NA	NA	UT4699	NA	SS-2489724	0.912585	PASS	0.776166	0.941786	0.813459	0.868	0.946	0.898	314.2	775.3	349.4	2052	835.3	4148.4	2538.6	375.9	4483.2	790.5	2961.1	246.4	767.6	936.6	87962.5	2086.2	6276.1
PLT35083	2024-10-30	SG14464449	D3	258740119472	4	OX_CF_00124	Sample	20	EDTA Plasma	a0y4W000016HHqiQAG	0452530354	a0y4W000016H70CQAS	NA	NA	NA	NA	NA	EXID40000012003055	EID1348471	NA	NA	UT4721	NA	SS-2489724	1.0339	PASS	1.08883	1.33638	1.19929	0.84	0.81	0.889	357.9	817.4	321.6	1611.7	1936.5	5542.9	2472.2	329.4	4786.1	809.5	3302.8	172.7	877.9	549.8	97161.1	2375.9	6803.5
[truncated: 95 more columns]

## Sheet: Sequence key
Name	Sequence ID	Uniprot ID	Entrez Gene Name
seq.10047.12	10047-12	P19878	NCF2
seq.10076.1	10076-1	O00189	AP4M1
seq.10623.19	10623-19	P15941	MUC1
seq.11232.46	11232-46	P20061	TCN1
seq.11265.8	11265-8	P00352	ALDH1A1
seq.11388.75	11388-75	Q14508	WFDC2
seq.11450.110	11450-110	P07237	P4HB
seq.11568.2	11568-2	P68106	FKBP1B
seq.11615.16	11615-16	Q9UN19	DAPP1
seq.11617.1	11617-1	P20701	ITGAL
seq.11636.33	11636-33	P37802	TAGLN2
seq.12014.19	12014-19	Q03393	PTS
seq.12376.85	12376-85	P55273	CDKN2D
seq.12580.7	12580-7	P28074	PSMB5
seq.13722.105	13722-105	P02748	C9
seq.14110.200	14110-200	P09486	SPARC
seq.15509.2	15509-2	P54802	NAGLU
seq.15515.2	15515-2	P0DJI8	SAA1
seq.15565.102	15565-102	Q8WXI7	MUC16
seq.15606.19	15606-19	P08727	KRT19
seq.16583.8	16583-8	P50583	NUDT2
seq.16765.52	16765-52	P02775	PPBP
seq.17137.160	17137-160	P68871	HBB
seq.17176.13	17176-13	O75475	PSIP1
seq.17411.55	17411-55	Q92890	UFD1
seq.17694.32	17694-32	Q9UL46	PSME2
seq.17750.8	17750-8	P31350	RRM2
seq.17805.35	17805-35	O75940	SMNDC1
seq.18158.45	18158-45	Q14790	CASP8
seq.18212.43	18212-43	P46439	GSTM5
seq.18386.36	18386-36	P35754	GLRX
seq.18891.98	18891-98	P32456	GBP2
seq.19113.66	19113-66	Q9UJC5	SH3BGRL2
seq.19267.14	19267-14	Q16775	HAGH
seq.19488.1	19488-1	O75340	PDCD6
seq.20243.26	20243-26	P07737	PFN1
seq.20586.18	20586-18	Q9P232	CNTN3
seq.20592.8	20592-8	Q9BS40	LXN
seq.21429.50	21429-50	P52888	THOP1
seq.21885.196	21885-196	P31483	TIA1
seq.23371.5	23371-5	Q9GZT8	NIF3L1
seq.24217.2	24217-2	P05109	S100A8
seq.2475.1	2475-1	P10721	KIT
seq.25076.2	25076-2	Q13228	SELENBP1
seq.25446.34	25446-34	Q5TDH0	DDI2
seq.2579.17	2579-17	P14780	MMP9
seq.2670.67	2670-67	P06732	CKM
seq.2695.25	2695-25	P16284	PECAM1
seq.2697.7	2697-7	P02776	PF4
seq.2754.50	2754-50	P01024	C3
seq.2789.26	2789-26	P09237	MMP7
seq.28253.7	28253-7	Q9H6Q3	SLA2
seq.2836.68	2836-68	P80188	LCN2
seq.2879.9	2879-9	P01011	SERPINA3
seq.2986.49	2986-49	P19876	CXCL3
seq.3000.66	3000-66	P11226	MBL2
seq.3042.7	3042-7	P02144	MB
seq.30457.3	30457-3	P26378	ELAVL4
seq.3050.7	3050-7	P04275	VWF
seq.3074.6	3074-6	P18428	LBP
seq.30824.52	30824-52	Q8WVC0	LEO1
seq.31089.1	31089-1	O75083	WDR1
seq.31621.59	31621-59	P80108	GPLD1
seq.31683.149	31683-149	Q9HCM4	EPB41L5
seq.31986.1	31986-1	O14578	CIT
seq.3204.2	3204-2	P09960	LTA4H
seq.32685.35	32685-35	P02750	LRG1
seq.3285.23	3285-23	P00736	C1R
seq.32992.4	32992-4	Q9UKV0	HDAC9
seq.33058.107	33058-107	P68133	ACTA1
seq.33158.135	33158-135	O00186	STXBP3
seq.3339.33	3339-33	P35442	THBS2
seq.33697.2	33697-2	P06731	CEACAM5
seq.3420.21	3420-21	Q8N1Q1	CA13
seq.3474.19	3474-19	P07996	THBS1
seq.35197.113	35197-113	Q08043	ACTN3
seq.3666.17	3666-17	Q9BXR6	CFHR5
seq.3860.7	3860-7	P60900	PSMA6
seq.4337.49	4337-49	P02741	CRP
seq.4342.10	4342-10	P05362	ICAM1
seq.4420.7	4420-7	O43184	ADAM12
seq.4496.60	4496-60	P39900	MMP12
seq.4719.58	4719-58	P30101	PDIA3
seq.4905.63	4905-63	Q14019	COTL1
seq.5006.71	5006-71	O15264	MAPK13
seq.5339.49	5339-49	P06702	S100A9
seq.5581.28	5581-28	Q08830	FGL1
seq.5717.2	5717-2	O75339	CILP
seq.5858.6	5858-6	P63104	YWHAZ
seq.5897.58	5897-58	P07492	GRP
seq.6565.68	6565-68	Q9H5V8	CDCP1
seq.6645.53	6645-53	Q15063	POSTN
seq.6992.67	6992-67	P02042	HBD
seq.7755.37	7755-37	P18084	ITGB5
seq.8243.55	8243-55	P00995	SPINK1
seq.8795.48	8795-48	P02786	TFRC
seq.9749.190	9749-190	P13796	LCP1
seq.9863.1	9863-1	P67936	TPM4
seq.9876.20	9876-20	P09972	ALDOC
seq.9883.29	9883-29	Q04760	GLO1
